# Supplementary material for: Partner Bereavement and Risk of Herpes Zoster: Results from Two Population-Based Case-Control Studies in Denmark and the United Kingdom
Source: PubMed Central journal article supplement (PMC5850543; doi:10.1093/cid/ciw840), 2016-12-15
Supplement: ciw840_suppl_supplementary_appendix_4.pdf [file ciw840_suppl_supplementary_appendix_4.pdf]

## Protocol

# Partner bereavement and risk of herpes zoster: a nationwide Danish case-control study

**Authors:** Sigrun Alba Johannesdottir Schmidt,<sup>1</sup> Henrik Søndergaard Pedersen,<sup>2</sup> Morten Fenger-Grøn,<sup>2</sup> Henrik Carl Schønheyder,<sup>3</sup> Sinéad Langan,<sup>4</sup> Henrik Toft Sørensen,<sup>1</sup> Mogens Vestergaard<sup>2</sup> Sigrun A J Schmidt,<sup>1</sup> Mogens Vestergaard,<sup>2</sup> Henrik S Pedersen,<sup>2</sup> Henrik C Schønheyder,<sup>3</sup> Sara L Thomas,<sup>4</sup> Liam Smeeth,<sup>4</sup> Kathryn E Mansfield,<sup>4</sup> Henrik T Sørensen,<sup>1</sup> Harriet J Forbes,<sup>4</sup> Sinéad M Langan<sup>4</sup>

### **Affiliations:**

<sup>1</sup>Department of Clinical Epidemiology, Aarhus University Hospital, Aarhus, Denmark

<sup>2</sup>Research Unit and Section for General Practice, Department of Public Health, Aarhus University, Denmark

<sup>3</sup>Department of Clinical Microbiology, Aalborg University Hospital, Aalborg, Denmark

<sup>4</sup>Faculty of Epidemiology and Population Health, London School of Hygiene and Tropical Medicine, United Kingdom

## **Protocol**

### **Amendments**

October 31, 2016: We have changed the prescription-based definition to include the zoster-specific tablet doses only (acyclovir in 800 mg tablet dose in packages with 35 pills or a 500 mg tablet dose of valacyclovir or famciclovir) in the main analysis (instead of as a sensitivity analysis). This change is based on preliminary data from an ongoing Danish validation study, which suggests that the algorithm including only the zoster-specific tablet doses is more specific than the broader definition including all tablet doses.

## Protocol

### BACKGROUND

Herpes zoster (HZ) is a frequent neurocutaneous disease caused by reactivation of varicella zoster virus (VZV), which lies latent in the sensory ganglia after the primary infection chickenpox.<sup>1,2</sup>

Reactivation occurs when the cell-mediated immunity towards VZV wanes below a certain critical level. Accordingly, the risk of HZ is increased among elderly because of immunosenescence, among patients with inherited cell-mediated immunodeficiency, and among patients with immunosuppression acquired by drugs (*e.g.*, patients receiving corticosteroids or chemotherapy), radiotherapy, viral infections (*i.e.*, human immunodeficiency virus [HIV]), or malignancy.<sup>2,3</sup>

Psychological stress is associated with activation of the hypothalamic-pituitary-adrenal axis and thereby suppression of the immune system,<sup>4-6</sup> which could in turn increase the risk of HZ. For example, it has been demonstrated that VZV-specific cell-mediated immunity is reduced in patients with major depression<sup>7</sup> and correlates negatively with severity of depressive symptoms.<sup>8</sup> Furthermore, the immunological response to the zoster vaccine is reduced in patients with untreated depression compared with individuals treated with antidepressants and individuals without depression.<sup>9</sup> Data on the association between psychological stressors other than psychiatric diagnoses and HZ are lacking.

Bereavement of a spouse or partner is considered one of the most stressful life events.<sup>10</sup> However, only four studies have examined spousal bereavement as a risk factor for HZ, showing conflicting results.<sup>11-14</sup> Comparison of the studies is hampered by study limitations and differences in methods used. First, previous studies may have been affected volunteer bias.<sup>12-14</sup> Second, various exposure windows and definitions have been employed by grouping spousal death together with other catastrophic health events in a spouse,<sup>11</sup> other spousal events (divorce, separation or marriage),<sup>13</sup> or other negative life events (*e.g.* health troubles or becoming unemployed).<sup>12,15</sup> Third, exposure definitions may have been prone to misclassification of spousal death due to recall

## **Protocol**

bias,<sup>12,13,15</sup> lack of interviewer blinding,<sup>12,13</sup> or use of claims data to identify spousal events.<sup>11</sup>

Finally, studies have been limited by small study size<sup>11-13,15</sup> and only one study performed detailed analysis according to timing of the life event.<sup>11</sup>

## **OBJECTIVE**

The objective of this study is to examine whether experiencing the death of a partner is associated with an increased risk of herpes zoster. Specifically, we will examine whether the association varies with time since bereavement, underlying immunosuppression, and diagnosis of depression/anxiety.

## **MATERIAL AND METHODS**

### **Setting and design**

We will conduct this study in Denmark, which has a population of approximately 5.6 million inhabitants. The Danish welfare system guarantees unfettered access to hospitals and general practitioners, as well as reimbursement of medication to various degrees.<sup>16</sup> Healthcare services provided are registered in various databases using the unique central personal register (CPR) number assigned to all residents at birth or upon immigration.<sup>16</sup> This study will be designed as a density case-control study using such databases. The study period will commence on January 1, 1997 with continuation until December 31, 2013, which ensures at least two years of prescription history for all study participants. All registry codes for the study are provided in the Supplementary Table S1.

### **Data sources**

The Danish National Patient Registry (DNPR) records data for the Danish hospital sector, including data on all admissions to non-psychiatric hospitals with nationwide coverage since 1978,

## Protocol

admissions to psychiatric wards since 1994, and visits to all outpatient hospital-based specialty clinics and emergency rooms since 1994.<sup>17</sup> Each registry record includes data pertaining to the patient (e.g. CPR number), dates of admission and discharge or start and end of outpatient follow-up, procedures, the primary diagnosis, and one or more secondary diagnoses.<sup>17</sup> Diagnoses are classified according to the *International Classification of Diseases*, 8<sup>th</sup> revision (ICD-8) until the end of 1993 and the 10<sup>th</sup> revision (ICD-10) thereafter. Surgical procedures are coded according to a Danish classification (1977 through 1995) and a Danish version of the Nordic Medico-Statistical Committee (NOMESCO) Classification of Surgical Procedures (from 1996 on). General practitioners and practicing specialists do not report to the DNPR.

The Danish Psychiatric Central Research Register (PCRR) collects data on all admissions to psychiatric departments since 1970 and on outpatient treatment and emergency room contacts since 1995.<sup>18</sup> The registry structure resembles that described for the DNPR, providing data on relevant dates and diagnosis codes for each hospital contact.<sup>18</sup>

The Danish National Prescription Registry provides information on computerized prescription drugs since 1995.<sup>19</sup> Each time a prescription is redeemed at the pharmacy, the patient's CPR number, the date, and the type and quantity of drug redeemed is recorded electronically for the database.<sup>19</sup> The type of drug is registered according to World Health Organization's *Anatomical Therapeutic Chemical Classification System*. Indication codes for treatment are available since 2004, but are used inconsistently (73% complete in 2012) and can be too unspecific for use in research.

The Danish National Diabetes Register includes data on diabetic patients since 1995.<sup>20</sup> The registry population is identified using an algorithm that combines diagnostic data from the DNPR, blood-glucose measurements from the National Health Service Register, prescriptions for anti-

## **Protocol**

diabetics according to the Danish National Prescription Registry, and civic data from the Civil Registration System.<sup>20</sup>

The Civil Registration System data on age, sex, address, and vital statistics for the entire population since 1968.<sup>16</sup> The registry also contains data on civil status (single, married, divorced, widow or widower, registered partnership, or dissolved registered partnership), CPR number of spouse or registered partner, and CPR numbers of children. As of 1989, information in the Civil Registration System is updated daily.

Linkage of all registries will be performed on the secure servers at Statistics Denmark, the central authority on Danish statistics, which collects, processes, and publishes information relating to the Danish society. Statistics Denmark also collects data from Danish education registers, such as the Population Education Register,<sup>21</sup> which was included in the present study.

## **Herpes zoster**

Cases will be defined through two sources:

- 1) DNPR: all patients with a first-time hospital diagnosis (inpatient, outpatient, emergency room) of HZ during 1997 through 2013. For inclusion of cases with hospital diagnosis of HZ (see Table below for codes), we will only consider those with a first-listed (primary=A) diagnosis of HZ (to avoid including long-term complications with inaccurate diagnosis date of primary HZ). The date of admission or start of outpatient follow-up will be considered the diagnosis date. We will restrict to patients aged 18 years or older because of differences in the epidemiology of HZ in children and adults.
- 2) The Prescription Registry: all individuals aged  $\geq 40$  years with a first-time prescription record for acyclovir, valacyclovir or famciclovir during 1997 through 2013.

## Protocol

### Codes used to identify case population (all sub-codes included unless otherwise stated)

| <i>Herpes zoster</i>                                  |                                                                                                                      |
|-------------------------------------------------------|----------------------------------------------------------------------------------------------------------------------|
| Hospital diagnosis (DNPR)                             | ICD-8: 053; ICD-10: B02, H03.1F, H13.1M, H19.0D, H19.2D, H19.2J, H22.0C, H62.1B, G05.1I, G05.1M                      |
| Treatment in general practice (Prescription Registry) |                                                                                                                      |
| Acyclovir                                             | ATC: J05AB01 (HZ-specific dose: 800 mg in packages of 35 tablets)                                                    |
| Valacyclovir                                          | ATC: J05AB11 (HZ-specific dose: 500 mg)                                                                              |
| Famciclovir                                           | ATC: J05AB09 (HZ-specific dose: 500 mg)                                                                              |
| <i>Postherpetic neuralgia (PHN)</i>                   | ICD-10: G530 or B022 (if specifically coded, if B02 is coded without further specification it is not defined as PHN) |

We will only consider patients with no previous codes for HZ or PHN in the DNPR (ICD codes in any position (inpatient, outpatient, emergency room, primary and secondary diagnoses) or the Prescription Registry (ATC codes). Thus, if the earliest mention of HZ in the data is a secondary 053, B02 or H03.1F, H13.1M, H19.0D, H19.2D, H19.2J, H22.0C, H62.1B, G05.1I, G05.1M code in DNPR or a primary or secondary PHN code, we will exclude the patient from the case population and the person will no longer be at risk of HZ (that is, not eligible as a control either).

The date of diagnosis (DNPR) or prescription (Prescription Registry), whichever comes first, will be considered the index date for HZ cases.

### Population Controls

We will use the Civil Registration System to individually match up to 4 population controls to each HZ case by age ( $\pm 2$  months) and sex. We will sample controls using risk-set sampling; that is, only individuals alive and with no previous primary or secondary diagnosis of HZ or PHN (ICD-8: 053; ICD-10: B02, G530) and no previous HZ related prescription (ATC: J05AB01, J05AB11, J05AB09) ever before the index date of the case will be eligible for inclusion. Controls will be assigned an index date identical to that of their case.

## Protocol

### Partner bereavement

We will use the Civil Registration System to retrieve information on marital status, corresponding partner, and all partner deaths for cases and controls prior to the index date. Partners will be identified using an algorithm developed by Statistics Denmark. From the DNPR, we will ascertain the entire hospital diagnosis history for deceased partners at one month before their date of death and compute their age-adjusted Charlson Comorbidity Index (ACCI)<sup>22</sup> as a proxy measure of whether the death of the partner was unforeseen. The original Charlson Comorbidity Index assigns 0 to 6 points to a range of chronic diseases according to their ability to predict death.<sup>22</sup> In the age-adjusted index points are also given according to age (1 point: 50-59 years; 2 point: 60-69 years; 3 points: 70-79 years; 4 points: 80-89 years; 5 points: 90-99 years).<sup>22</sup> The codes used for the index are shown below. Based on the total ACCI score, we will group study participants into three categories of risk of partner death: lowest risk (0–3 points), intermediate risk (4–6 points), or highest risk ( $\geq 7$  points).

### The age-adjusted Charlson Comorbidity Index

| <i>Score 1</i>              |                                                                                                           |
|-----------------------------|-----------------------------------------------------------------------------------------------------------|
| Myocardial infarction       | ICD-8: 410; ICD-10: I21, I22, I23                                                                         |
| Congestive heart failure    | ICD-8: 427.09, 427.10, 427.11, 427.19, 428.99, 782.49; ICD-10: I50, I11.0, I13.0, I13.2                   |
| Peripheral vascular disease | ICD-8: 440, 441, 442, 443, 444, 445; ICD-10: I70, I71, I72, I73, I74, I77                                 |
| Cerebrovascular disease     | ICD-8: 430–438; ICD-10: I60–I69, G45, G46                                                                 |
| Dementia                    | ICD-8: 290.09–290.19, 293.09; ICD-10: F00–F03, F05.1, G30                                                 |
| Chronic pulmonary disease   | ICD-8: 490–493, 515–518, ICD-10: J40–J47, J60–J67, J68.4, J70.1, J70.3, J84.1, J92.0, J96.1, J98.2, J98.3 |
| Connective tissue disease   | ICD-8: 712, 716, 734, 446, 135.99; ICD-10: M05, M06, M08, M09, M30, M31, M32, M33, M34, M35, M36, D86     |
| Ulcer disease               | ICD-8: 530.91, 530.98, 531–534; ICD-10: K22.1, K25–K28                                                    |
| Mild liver disease          | ICD-8: 571, 573.01, 573.04; ICD-10: B18, K70.0–K70.3, K70.9, K71, K73, K74, K76.0                         |



## Protocol

|                                     |                                                                                                                                  |
|-------------------------------------|----------------------------------------------------------------------------------------------------------------------------------|
| Diabetes type 1 and 2               | Registrations in the National Diabetes Register                                                                                  |
| <i>Score 2</i>                      |                                                                                                                                  |
| Hemiplegia                          | ICD-8: 344; ICD-10: G81, G82                                                                                                     |
| Moderate to severe renal disease    | ICD-8: 403, 404, 580–583, 584, 590.09, 593.19, 753.10–753.19, 792; ICD-10: I2, I13, N00–N05, N07, N11, N14, N17–N19, Q61         |
| Diabetes with end organ damage      | ICD-8: 249.01–249.05, 249.08, 250.01–250.05, 250.08; ICD-10: E10.2–E10.8, E11.2–E11.8, E14.2–E14.8                               |
| Any tumor                           | ICD-8: 140–194; ICD-10: C00–C75                                                                                                  |
| Leukemia                            | ICD-8: 204–207; ICD-10: C91–C95                                                                                                  |
| Lymphoma                            | ICD-8: 200–203, 275.59; ICD-10: C81–C85, C88, C90, C96                                                                           |
| <i>Score 3</i>                      |                                                                                                                                  |
| Moderate to severe liver disease    | ICD-8: 070.00, 070.02, 070.04, 070.06, 070.08, 573.00, 456.00–456.09; ICD-10: B15.0, B16.0, B16.2, B19.0, K70.4, K72, K76.6, I85 |
| <i>Score 6</i>                      |                                                                                                                                  |
| Metastatic solid tumor              | ICD-8: 195–198, 199; ICD-10: C76–C80                                                                                             |
| Acquired immune deficiency syndrome | ICD-8: 079.83; ICD-10: B21–B24                                                                                                   |
| <i>Age-scores</i>                   |                                                                                                                                  |
| 1 point: 50-59 years                |                                                                                                                                  |
| 2 point: 60-69 years                |                                                                                                                                  |
| 3 points: 70-79 years               |                                                                                                                                  |
| 4 points: 80-89 years               |                                                                                                                                  |
| 5 points: 90-99 years               |                                                                                                                                  |

## Covariables

Using the DNPR, the Prescription Registry, and the Danish National Diabetes Registry, we will identify previous records of: rheumatoid arthritis, systemic/subacute lupus erythematosus, inflammatory bowel disease, chronic obstructive pulmonary disease, asthma, diabetes (type I, type II, or unknown type), chronic kidney disease (chronic kidney disease stage 3 or higher, renal failure, chronic uraemia, dialysis or renal transplantation), human immunodeficiency virus infection, haematopoietic stem cell or bone marrow transplantation, solid organ transplantation (excluding renal transplants), or other cellular immune deficiency at any time before index date; leukaemia, lymphoma or myeloma within two years before the index date; and prescription records for oral glucocorticoids, other immunosuppressant drugs, or inhaled glucocorticoids within 90 days before the index date. For chronic obstructive pulmonary disease, we will include diagnoses of chronic

## **Protocol**

bronchitis and emphysema and required that patients were aged 35 years or older at first diagnosis. To capture active asthma, we will require that patients with a record of asthma also have an asthma-related prescription within the year before index date. Asthma patients are also required not to be classified as having chronic obstructive pulmonary disease. Diabetes will be identified using the Danish National Diabetes Registry. For descriptive purposes, we aimed to classify the type of diabetes as type I, type II, or unknown based on information on age at first record, age at first treatment and type of treatment. We will define type I diabetes as (1) age at first diagnosis  $\leq 35$  years and exclusive treatment with insulin prior to index date or (2)  $\geq 2$  insulin prescriptions at age  $\leq 35$  years but no diabetes diagnosis. Type II diabetes was defined as (1) age at first diabetes diagnosis  $> 35$  years or (2) exclusive treatment with oral anti-diabetics at age  $> 35$  years. We will classify remaining patients with diabetes as having unknown type.

We will also categorize educational level based on highest achieved education at index date as short ( $\leq 10$  years), medium ( $> 10$ – $15$  years), or long ( $> 15$  years). Educational level is included as a measure of socioeconomic status, which may be associated with health-seeking behavior.

We hypothesize that psychiatric disease, particularly depression and anxiety, may partly mediate the association between partner bereavement and HZ. We will therefore identify recent history of depression or anxiety, which we define as a diagnosis of depression, diagnosis of anxiety, or use of antidepressants within the past 90 days. We will exclude tricyclic antidepressant prescriptions among the antidepressants, because the competing indications insomnia and/or pain.

Code lists for all covariables are presented in the Appendix.

## **Statistical analysis**

In the following, each step of the statistical analyses is described:

## Protocol

- 1) We will produce descriptive statistics for all variables, including exposure. We will also stratify further by partner bereavement (overall and within 30 days before index date). With this information we can produce Table 1 and Appendix Table e1.

**Table 1.** Characteristics of herpes zoster cases and matched controls, Denmark, 1997–2013

|                                                     | <b>Cases (n=)</b> | <b>Controls (n=)</b> |
|-----------------------------------------------------|-------------------|----------------------|
| <b>Total</b>                                        | x (x.x%)          | x (x.x%)             |
| <b>Matching factors</b>                             |                   |                      |
| <b>Sex</b>                                          | x (x.x%)          | x (x.x%)             |
| Males                                               | x (x.x%)          | x (x.x%)             |
| Females                                             | x (x.x%)          | x (x.x%)             |
| <b>Age at index date (years)</b>                    |                   |                      |
| 30–49                                               | x (x.x%)          | x (x.x%)             |
| 50–59                                               | x (x.x%)          | x (x.x%)             |
| 60–69                                               | x (x.x%)          | x (x.x%)             |
| 70–79                                               | x (x.x%)          | x (x.x%)             |
| 80–89                                               | x (x.x%)          | x (x.x%)             |
| ≥90                                                 | x (x.x%)          | x (x.x%)             |
| <b>Herpes zoster risk factors</b>                   |                   |                      |
| Rheumatoid arthritis                                | x (x.x%)          | x (x.x%)             |
| Lupus erythematosus                                 | x (x.x%)          | x (x.x%)             |
| Inflammatory bowel disease                          | x (x.x%)          | x (x.x%)             |
| Chronic obstructive pulmonary disease               | x (x.x%)          | x (x.x%)             |
| Asthma                                              | x (x.x%)          | x (x.x%)             |
| Chronic kidney disease                              | x (x.x%)          | x (x.x%)             |
| Diabetes                                            | x (x.x%)          | x (x.x%)             |
| Type I                                              | x (x.x%)          | x (x.x%)             |
| Type II                                             | x (x.x%)          | x (x.x%)             |
| Unknown                                             | x (x.x%)          | x (x.x%)             |
| Inhaled corticosteroids                             | x (x.x%)          | x (x.x%)             |
| Solid organ transplantation                         | x (x.x%)          | x (x.x%)             |
| HIV infection                                       | x (x.x%)          | x (x.x%)             |
| Leukemia                                            | x (x.x%)          | x (x.x%)             |
| Lymphoma                                            | x (x.x%)          | x (x.x%)             |
| Myeloma                                             | x (x.x%)          | x (x.x%)             |
| Hematopoietic stem cell/bone marrow transplantation | x (x.x%)          | x (x.x%)             |
| Other unspecified cellular immune deficiencies      | x (x.x%)          | x (x.x%)             |
| Oral corticosteroids                                | x (x.x%)          | x (x.x%)             |
| Other immunosuppressive treatment                   | x (x.x%)          | x (x.x%)             |

For presentation in text also compute:

- Median (interquartile range) of age.
- Partner status
- Highest achieved education

## Protocol

|                                 |          |          |
|---------------------------------|----------|----------|
| Highest achieved education (DK) |          |          |
| Short                           | x (x.x%) | x (x.x%) |
| Medium                          | x (x.x%) | x (x.x%) |
| Long                            | x (x.x%) | x (x.x%) |
| Missing                         | x (x.x%) | x (x.x%) |
| <b>Civil status</b>             |          |          |
| Partner                         | x (x.x%) | x (x.x%) |
| No partner                      | x (x.x%) | x (x.x%) |
| Recently bereaved*              | x (x.x%) | x (x.x%) |

\*Civil status is updated 1<sup>st</sup> of January each year. Thus, a person carries the civil status from January to the end of the year. For persons who loose their partner (bereaved persons) in the index year, we will not be able to know if a person is single or has already found a new partner. Thus a category for “recently bereaved” is included showing if a person was bereaved within the last year.

**Supplementary Table e1.** Characteristics of herpes zoster cases and matched controls, Denmark, 1997–2013, by previous partner bereavement (yes/no)

|                                       | Cases (n=)                     |                                            |                             | Controls (n=)                  |                                            |                             |
|---------------------------------------|--------------------------------|--------------------------------------------|-----------------------------|--------------------------------|--------------------------------------------|-----------------------------|
|                                       | Partner bereavement, ever (n=) | Partner bereavement, previous 30 days (n=) | No partner bereavement (n=) | Partner bereavement, ever (n=) | Partner bereavement, previous 30 days (n=) | No partner bereavement (n=) |
| <b>Matching factors</b>               |                                |                                            |                             |                                |                                            |                             |
| Sex                                   | x (x.x%)                       | x (x.x%)                                   | x (x.x%)                    | x (x.x%)                       | x (x.x%)                                   | x (x.x%)                    |
| Males                                 | x (x.x%)                       | x (x.x%)                                   | x (x.x%)                    | x (x.x%)                       | x (x.x%)                                   | x (x.x%)                    |
| Females                               | x (x.x%)                       | x (x.x%)                                   | x (x.x%)                    | x (x.x%)                       | x (x.x%)                                   | x (x.x%)                    |
| Age at index date (years)             |                                |                                            |                             |                                |                                            |                             |
| 18–50                                 | x (x.x%)                       | x (x.x%)                                   | x (x.x%)                    | x (x.x%)                       | x (x.x%)                                   | x (x.x%)                    |
| 50–59                                 | x (x.x%)                       | x (x.x%)                                   | x (x.x%)                    | x (x.x%)                       | x (x.x%)                                   | x (x.x%)                    |
| 60–69                                 | x (x.x%)                       | x (x.x%)                                   | x (x.x%)                    | x (x.x%)                       | x (x.x%)                                   | x (x.x%)                    |
| 70–79                                 | x (x.x%)                       | x (x.x%)                                   | x (x.x%)                    | x (x.x%)                       | x (x.x%)                                   | x (x.x%)                    |
| 80–89                                 | x (x.x%)                       | x (x.x%)                                   | x (x.x%)                    | x (x.x%)                       | x (x.x%)                                   | x (x.x%)                    |
| 90–100                                | x (x.x%)                       | x (x.x%)                                   | x (x.x%)                    | x (x.x%)                       | x (x.x%)                                   | x (x.x%)                    |
| <b>Herpes zoster risk factors</b>     |                                |                                            |                             |                                |                                            |                             |
| Rheumatoid arthritis                  | x (x.x%)                       | x (x.x%)                                   | x (x.x%)                    | x (x.x%)                       | x (x.x%)                                   | x (x.x%)                    |
| Lupus erythematosus                   | x (x.x%)                       | x (x.x%)                                   | x (x.x%)                    | x (x.x%)                       | x (x.x%)                                   | x (x.x%)                    |
| Inflammatory bowel disease            | x (x.x%)                       | x (x.x%)                                   | x (x.x%)                    | x (x.x%)                       | x (x.x%)                                   | x (x.x%)                    |
| Chronic obstructive pulmonary disease | x (x.x%)                       | x (x.x%)                                   | x (x.x%)                    | x (x.x%)                       | x (x.x%)                                   | x (x.x%)                    |
| Asthma                                | x (x.x%)                       | x (x.x%)                                   | x (x.x%)                    | x (x.x%)                       | x (x.x%)                                   | x (x.x%)                    |
| Chronic kidney disease                | x (x.x%)                       | x (x.x%)                                   | x (x.x%)                    | x (x.x%)                       | x (x.x%)                                   | x (x.x%)                    |
| Diabetes                              | x (x.x%)                       | x (x.x%)                                   | x (x.x%)                    | x (x.x%)                       | x (x.x%)                                   | x (x.x%)                    |
| Type I                                | x (x.x%)                       | x (x.x%)                                   | x (x.x%)                    | x (x.x%)                       | x (x.x%)                                   | x (x.x%)                    |
| Type II                               | x (x.x%)                       | x (x.x%)                                   | x (x.x%)                    | x (x.x%)                       | x (x.x%)                                   | x (x.x%)                    |
| Unknown                               | x (x.x%)                       | x (x.x%)                                   | x (x.x%)                    | x (x.x%)                       | x (x.x%)                                   | x (x.x%)                    |
| Inhaled corticosteroids               | x (x.x%)                       | x (x.x%)                                   | x (x.x%)                    | x (x.x%)                       | x (x.x%)                                   | x (x.x%)                    |
| Solid organ transplantation           | x (x.x%)                       | x (x.x%)                                   | x (x.x%)                    | x (x.x%)                       | x (x.x%)                                   | x (x.x%)                    |

## Protocol

|                                                     |          |          |          |          |          |          |
|-----------------------------------------------------|----------|----------|----------|----------|----------|----------|
| HIV infection                                       | x (x.x%) | x (x.x%) | x (x.x%) | x (x.x%) | x (x.x%) | x (x.x%) |
| Leukemia                                            | x (x.x%) | x (x.x%) | x (x.x%) | x (x.x%) | x (x.x%) | x (x.x%) |
| Lymphoma                                            | x (x.x%) | x (x.x%) | x (x.x%) | x (x.x%) | x (x.x%) | x (x.x%) |
| Myeloma                                             | x (x.x%) | x (x.x%) | x (x.x%) | x (x.x%) | x (x.x%) | x (x.x%) |
| Hematopoietic stem cell/bone marrow transplantation | x (x.x%) | x (x.x%) | x (x.x%) | x (x.x%) | x (x.x%) | x (x.x%) |
| Other unspecified cellular immune deficiencies      | x (x.x%) | x (x.x%) | x (x.x%) | x (x.x%) | x (x.x%) | x (x.x%) |
| Oral corticosteroids                                | x (x.x%) | x (x.x%) | x (x.x%) | x (x.x%) | x (x.x%) | x (x.x%) |
| Other immunosuppressive treatment                   | x (x.x%) | x (x.x%) | x (x.x%) | x (x.x%) | x (x.x%) | x (x.x%) |

- 2) We will use conditional logistic regression to compute unadjusted odds ratios (ORs) with 99% confidence intervals (CIs), associating partner bereavement with HZ. We will then fit a multivariable conditional logistic regression model with adjustment for HZ risk factors. We will perform analyses overall and by time between bereavement and index date. The reference group for all analyses will be persons who have not previously experienced partner death. From this we can produce Table 2.

**Table 2.** Odds ratios for the association between partner bereavement and herpes zoster

|                                 | Cases, n (%) | Controls, n (%) | Unadjusted odds ratio (99% confidence interval) | Adjusted odds ratio (99% confidence interval)* |
|---------------------------------|--------------|-----------------|-------------------------------------------------|------------------------------------------------|
| No previous partner bereavement |              |                 | –                                               | –                                              |
| Partner bereavement             |              |                 |                                                 |                                                |
| 0–7 days                        |              |                 |                                                 |                                                |
| 8–14 days                       |              |                 |                                                 |                                                |
| 15–30 days                      |              |                 |                                                 |                                                |
| 31–90 days                      |              |                 |                                                 |                                                |
| 91–365 days                     |              |                 |                                                 |                                                |
| 366–1095 days                   |              |                 |                                                 |                                                |
| >1095 days                      |              |                 |                                                 |                                                |

## Protocol

\*Adjusted for rheumatoid arthritis, lupus erythematosus, inflammatory bowel disease, asthma, chronic kidney disease, diabetes, inhaled corticosteroids, solid organ transplantation, HIV infection, leukaemia, lymphoma, myeloma, hematopoietic stem cell/bone marrow transplantation, Other unspecified cellular immune deficiencies, oral glucocorticoids, other immunosuppressive treatment.

- 3) We will stratify the results for bereavement within 30 days before the index date by categories of risk of partner death, age, sex, and recent depression/anxiety. We will additionally perform this analysis for bereavement within 90 days before index date and present in Appendix Table e2.

**Table 3.** Odds ratios for the association between partner bereavement within previous 30 days and herpes zoster, subgroup analysis

|                                                                                                                                                                                                                                                                                                                                                                                                 | Cases, number (%) | Controls, number (%) | Unadjusted odds ratio (99% confidence interval) | Adjusted odds ratio (99% confidence interval)* |
|-------------------------------------------------------------------------------------------------------------------------------------------------------------------------------------------------------------------------------------------------------------------------------------------------------------------------------------------------------------------------------------------------|-------------------|----------------------|-------------------------------------------------|------------------------------------------------|
| Partners ACCI                                                                                                                                                                                                                                                                                                                                                                                   |                   |                      |                                                 |                                                |
| Low                                                                                                                                                                                                                                                                                                                                                                                             |                   |                      |                                                 |                                                |
| Intermediate                                                                                                                                                                                                                                                                                                                                                                                    |                   |                      |                                                 |                                                |
| High                                                                                                                                                                                                                                                                                                                                                                                            |                   |                      |                                                 |                                                |
| Partner terminal                                                                                                                                                                                                                                                                                                                                                                                |                   |                      |                                                 |                                                |
| No                                                                                                                                                                                                                                                                                                                                                                                              |                   |                      |                                                 |                                                |
| Yes                                                                                                                                                                                                                                                                                                                                                                                             |                   |                      |                                                 |                                                |
| Sex                                                                                                                                                                                                                                                                                                                                                                                             |                   |                      |                                                 |                                                |
| Female                                                                                                                                                                                                                                                                                                                                                                                          |                   |                      |                                                 |                                                |
| Male                                                                                                                                                                                                                                                                                                                                                                                            |                   |                      |                                                 |                                                |
| Age at index date (years)                                                                                                                                                                                                                                                                                                                                                                       |                   |                      |                                                 |                                                |
| 18–50                                                                                                                                                                                                                                                                                                                                                                                           |                   |                      |                                                 |                                                |
| 50–59                                                                                                                                                                                                                                                                                                                                                                                           |                   |                      |                                                 |                                                |
| 60–69                                                                                                                                                                                                                                                                                                                                                                                           |                   |                      |                                                 |                                                |
| 70–79                                                                                                                                                                                                                                                                                                                                                                                           |                   |                      |                                                 |                                                |
| 80–89                                                                                                                                                                                                                                                                                                                                                                                           |                   |                      |                                                 |                                                |
| 90–100                                                                                                                                                                                                                                                                                                                                                                                          |                   |                      |                                                 |                                                |
| Recent diagnosis of depression/anxiety                                                                                                                                                                                                                                                                                                                                                          |                   |                      |                                                 |                                                |
| No                                                                                                                                                                                                                                                                                                                                                                                              |                   |                      |                                                 |                                                |
| Yes                                                                                                                                                                                                                                                                                                                                                                                             |                   |                      |                                                 |                                                |
| *Adjusted for rheumatoid arthritis, lupus erythematosus, inflammatory bowel disease, asthma, chronic kidney disease, diabetes, inhaled corticosteroids, solid organ transplantation, HIV infection, leukaemia, lymphoma, myeloma, hematopoietic stem cell/bone marrow transplantation, Other unspecified cellular immune deficiencies, oral glucocorticoids, other immunosuppressive treatment. |                   |                      |                                                 |                                                |

## Protocol

**Supplementary Table e2.** Odds ratios for the association between partner bereavement within previous 90 days and herpes zoster, subgroup analysis

|                                                                                                                                                                                                                                                                                                                                                                                                 | Cases, number (%) | Controls, number (%) | Unadjusted odds ratio (99% confidence interval) | Adjusted odds ratio (99% confidence interval)* |
|-------------------------------------------------------------------------------------------------------------------------------------------------------------------------------------------------------------------------------------------------------------------------------------------------------------------------------------------------------------------------------------------------|-------------------|----------------------|-------------------------------------------------|------------------------------------------------|
| Partners ACCI                                                                                                                                                                                                                                                                                                                                                                                   |                   |                      |                                                 |                                                |
| Low                                                                                                                                                                                                                                                                                                                                                                                             |                   |                      |                                                 |                                                |
| Intermediate                                                                                                                                                                                                                                                                                                                                                                                    |                   |                      |                                                 |                                                |
| High                                                                                                                                                                                                                                                                                                                                                                                            |                   |                      |                                                 |                                                |
| Partner terminal                                                                                                                                                                                                                                                                                                                                                                                |                   |                      |                                                 |                                                |
| No                                                                                                                                                                                                                                                                                                                                                                                              |                   |                      |                                                 |                                                |
| Yes                                                                                                                                                                                                                                                                                                                                                                                             |                   |                      |                                                 |                                                |
| Sex                                                                                                                                                                                                                                                                                                                                                                                             |                   |                      |                                                 |                                                |
| Female                                                                                                                                                                                                                                                                                                                                                                                          |                   |                      |                                                 |                                                |
| Male                                                                                                                                                                                                                                                                                                                                                                                            |                   |                      |                                                 |                                                |
| Age at index date (years)                                                                                                                                                                                                                                                                                                                                                                       |                   |                      |                                                 |                                                |
| 18–50                                                                                                                                                                                                                                                                                                                                                                                           |                   |                      |                                                 |                                                |
| 50–59                                                                                                                                                                                                                                                                                                                                                                                           |                   |                      |                                                 |                                                |
| 60–69                                                                                                                                                                                                                                                                                                                                                                                           |                   |                      |                                                 |                                                |
| 70–79                                                                                                                                                                                                                                                                                                                                                                                           |                   |                      |                                                 |                                                |
| 80–89                                                                                                                                                                                                                                                                                                                                                                                           |                   |                      |                                                 |                                                |
| 90–100                                                                                                                                                                                                                                                                                                                                                                                          |                   |                      |                                                 |                                                |
| Recent diagnosis of depression/anxiety                                                                                                                                                                                                                                                                                                                                                          |                   |                      |                                                 |                                                |
| No                                                                                                                                                                                                                                                                                                                                                                                              |                   |                      |                                                 |                                                |
| Yes                                                                                                                                                                                                                                                                                                                                                                                             |                   |                      |                                                 |                                                |
| *Adjusted for rheumatoid arthritis, lupus erythematosus, inflammatory bowel disease, asthma, chronic kidney disease, diabetes, inhaled corticosteroids, solid organ transplantation, HIV infection, leukaemia, lymphoma, myeloma, hematopoietic stem cell/bone marrow transplantation, Other unspecified cellular immune deficiencies, oral glucocorticoids, other immunosuppressive treatment. |                   |                      |                                                 |                                                |

- 4) We will perform a sensitivity analysis repeating the main analysis among those who have a partner to see if using only persons who have a partner in the reference group affects the results.

**Supplementary Table e3.** Sensitivity analysis restricting to persons with partners

|  | Cases, n (%) | Controls, n (%) | Unadjusted odds ratio (99% confidence interval) | Adjusted odds ratio (99% confidence interval)* |
|--|--------------|-----------------|-------------------------------------------------|------------------------------------------------|
|  |              |                 |                                                 |                                                |

## Protocol

|                                                                                                                                                                                                                                                                                                                                                                                                 |  |  |   |   |
|-------------------------------------------------------------------------------------------------------------------------------------------------------------------------------------------------------------------------------------------------------------------------------------------------------------------------------------------------------------------------------------------------|--|--|---|---|
| No previous partner bereavement                                                                                                                                                                                                                                                                                                                                                                 |  |  | – | – |
| Partner bereavement                                                                                                                                                                                                                                                                                                                                                                             |  |  |   |   |
| 0–7 days                                                                                                                                                                                                                                                                                                                                                                                        |  |  |   |   |
| 8–14 days                                                                                                                                                                                                                                                                                                                                                                                       |  |  |   |   |
| 15–30 days                                                                                                                                                                                                                                                                                                                                                                                      |  |  |   |   |
| 31–90 days                                                                                                                                                                                                                                                                                                                                                                                      |  |  |   |   |
| 91–365 days                                                                                                                                                                                                                                                                                                                                                                                     |  |  |   |   |
| 366–1095 days                                                                                                                                                                                                                                                                                                                                                                                   |  |  |   |   |
| >1095 days                                                                                                                                                                                                                                                                                                                                                                                      |  |  |   |   |
| No partner identified (vs. those with partner)                                                                                                                                                                                                                                                                                                                                                  |  |  |   |   |
| *Adjusted for rheumatoid arthritis, lupus erythematosus, inflammatory bowel disease, asthma, chronic kidney disease, diabetes, inhaled corticosteroids, solid organ transplantation, HIV infection, leukaemia, lymphoma, myeloma, hematopoietic stem cell/bone marrow transplantation, Other unspecified cellular immune deficiencies, oral glucocorticoids, other immunosuppressive treatment. |  |  |   |   |

- 5) We will perform a sensitivity analysis adjusting for education as a measure of socioeconomic status. In the analyses, persons with missing data on education will be included in the lower group.

**Supplementary Table e4.** Sensitivity analysis additionally adjusting for measures of patient level socioeconomic status, measured by the length of education in the Danish data

|                                                                                                                                                                                                                                                                                                                                                                                                 | Adjusted odds ratio (99% confidence interval)*, fully adjusted model |
|-------------------------------------------------------------------------------------------------------------------------------------------------------------------------------------------------------------------------------------------------------------------------------------------------------------------------------------------------------------------------------------------------|----------------------------------------------------------------------|
| No previous partner bereavement                                                                                                                                                                                                                                                                                                                                                                 | –                                                                    |
| Partner bereavement                                                                                                                                                                                                                                                                                                                                                                             |                                                                      |
| 0–7 days                                                                                                                                                                                                                                                                                                                                                                                        |                                                                      |
| 8–14 days                                                                                                                                                                                                                                                                                                                                                                                       |                                                                      |
| 15–30 days                                                                                                                                                                                                                                                                                                                                                                                      |                                                                      |
| 31–90 days                                                                                                                                                                                                                                                                                                                                                                                      |                                                                      |
| 91–365 days                                                                                                                                                                                                                                                                                                                                                                                     |                                                                      |
| 366–1095 days                                                                                                                                                                                                                                                                                                                                                                                   |                                                                      |
| >1095 days                                                                                                                                                                                                                                                                                                                                                                                      |                                                                      |
| *Adjusted for rheumatoid arthritis, lupus erythematosus, inflammatory bowel disease, asthma, chronic kidney disease, diabetes, inhaled corticosteroids, solid organ transplantation, HIV infection, leukaemia, lymphoma, myeloma, hematopoietic stem cell/bone marrow transplantation, Other unspecified cellular immune deficiencies, oral glucocorticoids, other immunosuppressive treatment. |                                                                      |



## Protocol

6) Finally, we will perform two sensitivity analyses to examine the robustness of our prescription-based definition of HZ. In a stepwise manner, we will aim to increase the positive predictive value of our algorithm by making it more and more restrictive by each step. After each step, we will compute the adjusted odds ratio, to assess the effect of the increasing restriction. The steps are as follows:

- a. First, we will restrict to those with prescriptions for acyclovir in 800 mg tablet-dose in packages with 35 pills, valacyclovir in 500 mg tablet-dose, or famciclovir in 500 mg tablet-dose. This will be done by using the specific product number for the agents, which are:

| Treatment in general practice (Prescription Registry) | VNR (Varenummer)                                                                                                               |
|-------------------------------------------------------|--------------------------------------------------------------------------------------------------------------------------------|
| Acyclovir (J05AB01), 800 mg in packages of 35 tablets | 005404, 007109, 044597, 057554, 078015, 082158, 106864, 397653, 434183, 447144, 470021, 480533, 496455, 515258, 516328, 560359 |
| Valacyclovir (J05AB11), 500 mg                        | All VNR for the ATC code except for 030449, 172940, 447695, 498063, 534343                                                     |
| Famciclovir (J05AB09), 500 mg                         | 088196, 455584, 494756, 550906                                                                                                 |

- b. Second, we will also restrict to cases with indication codes explicitly stating HZ (INDO 0000135 and 0000314):.
- c. Third, we will also restrict the analysis to those diagnosed in 2000 or later to ensure a prescription history of at least five years for ascertaining first-time prescription for antiviral drug and covariables.

**Table e6.** Sensitivity analysis testing the robustness of the prescription-based definition of herpes zoster in Danish data.

|                                 | Adjusted odds ratio (99% confidence interval)*      |                                                                                     |                                                 |
|---------------------------------|-----------------------------------------------------|-------------------------------------------------------------------------------------|-------------------------------------------------|
|                                 | Step 1. Restricting to herpes zoster specific doses | Step 2. Restricting to those with indication codes explicitly stating herpes zoster | Step 3. Restrict study period to 2000 or later. |
| No previous partner bereavement |                                                     |                                                                                     |                                                 |

## Protocol

|                                                                                                                                                                                                                                                                                                                                                                                                 |  |  |  |
|-------------------------------------------------------------------------------------------------------------------------------------------------------------------------------------------------------------------------------------------------------------------------------------------------------------------------------------------------------------------------------------------------|--|--|--|
| Partner bereavement, overall                                                                                                                                                                                                                                                                                                                                                                    |  |  |  |
| Partner bereavement, by time                                                                                                                                                                                                                                                                                                                                                                    |  |  |  |
| 0–7 days                                                                                                                                                                                                                                                                                                                                                                                        |  |  |  |
| 8–14 days                                                                                                                                                                                                                                                                                                                                                                                       |  |  |  |
| 15–30 days                                                                                                                                                                                                                                                                                                                                                                                      |  |  |  |
| 31–90 days                                                                                                                                                                                                                                                                                                                                                                                      |  |  |  |
| 91–365 days                                                                                                                                                                                                                                                                                                                                                                                     |  |  |  |
| 366–1095 days                                                                                                                                                                                                                                                                                                                                                                                   |  |  |  |
| *Adjusted for rheumatoid arthritis, lupus erythematosus, inflammatory bowel disease, asthma, chronic kidney disease, diabetes, inhaled corticosteroids, solid organ transplantation, HIV infection, leukaemia, lymphoma, myeloma, hematopoietic stem cell/bone marrow transplantation, Other unspecified cellular immune deficiencies, oral glucocorticoids, other immunosuppressive treatment. |  |  |  |

## DATA SOURCES

- The Danish National Patient Registry
- The Danish Psychiatric Central Research Register
- The Danish National Prescription Registry
- The Danish National Diabetes Register
- The Civil Registration System
- Danish education registers at Statistics Denmark

## APPROVALS

The study is approved by the Data Protection Agency.

## Protocol

## REFERENCES

- 1 Serraino D, Franceschi S, Talamini R, Frustaci S, La Vecchia C. Non-occupational risk factors for adult soft-tissue sarcoma in northern Italy. *Cancer Causes Control* 1991; **2**: 157–64.
- 2 Wilson JF. Herpes zoster. *Ann Intern Med* 2011; **154**: ITC31–15.
- 3 Sheu J-J, Keller JJ, Lin HC. Increased risk of cancer after Bell's palsy: a 5-year follow-up study. *J Neurooncol* 2012; **110**: 215–20.
- 4 Smith JB, Fenske NA. Herpes zoster and internal malignancy. *South Med J* 1995; **88**: 1089–92.
- 5 Reiche EMV, Nunes SOV, Morimoto HK. Stress, depression, the immune system, and cancer. *Lancet Oncol* 2004; **5**: 617–25.
- 6 Glaser R, Kiecolt-Glaser JK. Stress-induced immune dysfunction: implications for health. *Nat Rev Immunol* 2005; **5**: 243–51.
- 7 Irwin M, Costlow C, Williams H, *et al.* Cellular immunity to varicella-zoster virus in patients with major depression. *J Infect Dis* 1998; **178 Suppl 1**: S104–8.
- 8 Irwin MR, Levin MJ, Carrillo C, *et al.* Major depressive disorder and immunity to varicella-zoster virus in the elderly. *Brain Behav Immun* 2011; **25**: 759–66.
- 9 Irwin MR, Levin MJ, Laudenslager ML, *et al.* Varicella zoster virus-specific immune responses to a herpes zoster vaccine in elderly recipients with major depression and the impact of antidepressant medications. *Clin Infect Dis* 2013; **56**: 1085–93.
- 10 Miller MA, Rahe RH. Life changes scaling for the 1990s. *J Psychosom Res* 1997; **43**: 279–92.
- 11 Harpaz R, Leung JW, Brown CJ, Zhou FJ. Psychological stress as a trigger for herpes zoster: might the conventional wisdom be wrong? *Clin Infect Dis* 2015; **60**: 781–5.
- 12 Lasserre A, Blaizeau F, Gorwood P, *et al.* Herpes zoster: family history and psychological stress-case-control study. *J Clin Virol* 2012; **55**: 153–7.
- 13 Schmader K, Studenski S, MacMillan J, Grufferman S, Cohen HJ. Are stressful life events risk factors for herpes zoster? *J Am Geriatr Soc* 1990; **38**: 1188–94.
- 14 Schmader K, George LK, Burchett BM, Hamilton JD, Pieper CF. Race and stress in the incidence of herpes zoster in older adults. *J Am Geriatr Soc* 1998; **46**: 973–7.
- 15 Schmader K, George LK, Burchett BM, Pieper CF. Racial and psychosocial risk factors for herpes zoster in the elderly. *J Infect Dis* 1998; **178 Suppl 1**: S67–70.
- 16 Schmidt M, Pedersen L, Sørensen HT. The Danish Civil Registration System as a tool in epidemiology. *Eur J Epidemiol* 2014; **29**: 541–9.
- 17 Lynge E, Sandegaard JL, Rebolj M. The Danish National Patient Register. *Scand J Public Health* 2011; **39**: 30–3.

## Protocol

- 18 Mors O, Perto GP, Mortensen PB. The Danish Psychiatric Central Research Register. *Scand J Public Health* 2011; **39**: 54–7.
- 19 Kildemoes HW, Sørensen HT, Hallas J. The Danish National Prescription Registry. *Scand J Public Health* 2011; **39**: 38–41.
- 20 Carstensen B, Kristensen JK, Marcussen MM, Borch-Johnsen K. The National Diabetes Register. *Scand J Public Health* 2011; **39**: 58–61.
- 21 Jensen VM, Rasmussen AW. Danish Education Registers. *Scand J Public Health* 2011; **39**: 91–4.
- 22 Charlson M, Szatrowski TP, Peterson J, Gold J. Validation of a combined comorbidity index. *J Clin Epidemiol* 1994; **47**: 1245–51.

## Protocol

### Appendix. Codes used to identify covariables

**Table 1. International classification of diseases (ICD) version 10 codes**

#### *Depression*

|        |                                                                                        |
|--------|----------------------------------------------------------------------------------------|
| DF0003 | Dementia in early onset Alzheimers disease with depressive symptoms                    |
| DF0013 | Dementia in late onset Alzheimers disease with depressive symptoms                     |
| DF0023 | Dementia in atypical Alzheimers disease with depressive symptoms                       |
| DF0093 | Dementia in Alzheimers disease with depressive symptoms, without further specification |
| DF0103 | Vascular dementia with acute debut with depressive symptoms                            |
| DF0113 | Multi-infarction dementia with depressive symptoms                                     |
| DF0123 | Subcortical vascular dementia with depressive symptoms                                 |
| DF0133 | Mixed cortical and subcortical vascular dementia with depressive symptoms              |
| DF0183 | Other vascular dementia with depressive symptoms                                       |
| DF0193 | Vascular dementia with depressive symptoms, without further specification              |
| DF0203 | Dementia in Picks disease with depressive symptoms                                     |
| DF0213 | Dementia in Creutzfeldt-Jakobs disease with depressive symptoms                        |
| DF0223 | Dementia in Huntingtons disease with depressive symptoms                               |
| DF0233 | Dementia in Parkinsons disease with depressive symptoms                                |
| DF0243 | Dementia in HIV with depressive symptoms                                               |
| DF0283 | Dementia with depressive symptoms in other disease                                     |
| DF0393 | Dementia with depressive symptoms, without further specification                       |
| DF0632 | Organic depressive mental disease                                                      |
| DF1054 | Alkoholbetinget psykotisk tilstand, med depressive symptome                            |
| DF1154 | Psykotisk tilstand opioidbetinget, med depressive                                      |
| DF1254 | Cannabisbetinget psykotisk tilstand med depressive                                     |
| DF1354 | Sedativa-hypnotikabetinget psykotisk tilst, depressi                                   |
| DF1454 | Kokainbetinget psykotisk tilstand med depressive                                       |
| DF1554 | Stimulantiabetinget psykotisk tilstand, depressive                                     |
| DF1654 | Hallucinogenbetinget psykotisk tilstand, depressi                                      |
| DF1854 | Snifferstofbetinget psykotisk tilstand, depressi                                       |
| DF1954 | Psykotisk tilstand flere/andre stoffer, depressive                                     |
| DF204  | Post-skizofren depression                                                              |
| DF2040 | Kontinuerlig post-skizofren depression                                                 |
| DF2041 | Episodisk post-skizofren depression m fremadskridende defekt                           |
| DF2042 | Episodisk post-skizofren depression med stabil defekt                                  |
| DF2043 | Episodisk remitterende post-skizofren depression                                       |
| DF2044 | Post-skizofren depression med inkomplet remission                                      |
| DF2045 | Post-skizofren depression med komplet remission                                        |
| DF2048 | Post-skizofren depression med andet forløb                                             |
| DF2049 | Post-skizofren depression med ubestemt forløb                                          |

## Protocol

|        |                                                               |
|--------|---------------------------------------------------------------|
| DF25   | Skizoaffektive psykoser                                       |
| DF250  | Skizoaffektiv psykose af manisk type                          |
| DF2500 | Skizoaffektiv manisk psykose med samtidige symptomer          |
| DF2501 | Skizoaffektiv manisk psykose med varige skizofrene symptomer  |
| DF251  | Skizoaffektiv psykose af depressiv type                       |
| DF2510 | Skizoaffektiv depressiv psykose med samtidige symptomer       |
| DF2511 | Skizoaffektiv depressiv psykose med varige skizofrene sympt.  |
| DF252  | Skizoaffektiv blandet manisk-depressiv psykose                |
| DF2520 | Skizoaffektiv bland. man-depr. psykose m samtidige symptomer  |
| DF2521 | Skizoaffektiv man-depr. psykose m varige skizofrene symptomer |
| DF258  | Skizoaffektiv psykose af anden type                           |
| DF2580 | Anden skizoaffektiv psykose med samtidige symptomer           |
| DF2581 | Anden skizoaffektiv psykose med varige skizofrene symptomer   |
| DF259  | Skizoaffektiv psykose UNS                                     |
| DF2590 | Skizoaffektiv psykose UNS med samtidige symtomer              |
| DF2591 | Skizoaffektiv psykose UNS med varige skizofrene symptomer     |
| DF32   | Depressiv enkeltepisode                                       |
| DF320  | Depressiv enkeltepisode af lettere grad                       |
| DF3200 | Depressiv non-melankoliform enkeltepisode af lettere grad     |
| DF3201 | Depressiv melankoliform enkeltepisode af lettere grad         |
| DF321  | Depressiv enkeltepisode af moderat grad                       |
| DF3210 | Depressiv non-melankoliform enkeltepisode af moderat grad     |
| DF3211 | Depressiv melankoliform enkeltepisode af moderat grad         |
| DF322  | Depress. enkeltepisode af svær grad u psykot. sympt.          |
| DF323  | Depressiv enkeltepisode af svær grad m. psykotiske symptomer  |
| DF3230 | Depress. enkeltepisode, svær grad, stemn.kongr.psykot. Sympt  |
| DF3231 | Depress.enkeltepisode, svær grad, stemn.inkongr.psykot.sympt  |
| DF328  | Depressiv enkeltepisode af anden type                         |
| DF329  | Depressiv enkeltepisode UNS                                   |
| DF329A | Depressiv tilstand uden specifikation                         |
| DF33   | Periodisk depression                                          |
| DF330  | Periodisk depression i episode af lettere grad                |
| DF3300 | Periodisk non-melankoliform depression i episode af let grad  |
| DF3301 | Periodisk melankoliform depression i episode af let grad      |
| DF331  | Periodisk depression i episode af moderat grad                |
| DF3310 | Periodisk non-melankoliform depression, moderat grad          |
| DF3311 | Periodisk melankoliform depression i episode af moderat grad  |
| DF332  | Periodisk depression i episode af svær grad u psykot. sympt.  |
| DF333  | Periodisk depression i episode af svær grad m psykot. sympt.  |
| DF3330 | Periodisk depression, svær grad, stemningskongr.psykot.sympt  |
| DF3331 | Periodisk depression, svær grad, stemn.inkongr. psykot.sympt  |
| DF334  | Periodisk depression i remission                              |
| DF338  | Periodisk depression af anden type                            |

## Protocol

|         |                                                                    |
|---------|--------------------------------------------------------------------|
| DF339   | Periodisk depression UNS                                           |
| DF341   | Dystymi                                                            |
| DF3410  | Depressiv personlighedsstruktur                                    |
| DF3411  | Kronisk lettere depressionstilstand                                |
| DF3810  | Affektiv sindslid. m. tilbagevend., kortvarige depressioner        |
| DF530   | Lettere psykisk lidelse i barselsperioden IKA                      |
| DF530A  | Barselsdepression                                                  |
| DO993B2 | Depression som komplicerer graviditet, fødsel eller barselsperiode |

### *Anxiety*

|         |                                                                       |
|---------|-----------------------------------------------------------------------|
| DF064   | Organisk angsttilstand                                                |
| DF40    | Fobiske angsttilstande                                                |
| DF400   | Agorafobi                                                             |
| DF4000  | Agorafobi uden panikangst                                             |
| DF4001  | Agorafobi med panikangst                                              |
| DF401   | Socialfobi                                                            |
| DF402   | Enkelfobi                                                             |
| DF402A  | Parasitofobi                                                          |
| DF408   | Fobisk angst af anden type                                            |
| DF408A  | Venerofobi                                                            |
| DF409   | Fobisk angst UNS                                                      |
| DF41    | Andre angsttilstande                                                  |
| DF410   | Panikangst                                                            |
| DF4100  | Moderat panikangst                                                    |
| DF4101  | Svær panikangst                                                       |
| DF411   | Generaliseret angst                                                   |
| DF412   | Lettere angst-depressionstilstand                                     |
| DF413   | Anden blandet angsttilstand                                           |
| DF418   | Anden angsttilstand                                                   |
| DF418A  | Fødselsangst                                                          |
| DF418B  | Angsthysteri                                                          |
| DF419   | Angsttilstand UNS                                                     |
| DO993B3 | Angsttilstand som komplicerer graviditet, fødsel eller barselsperiode |

### *Rheumatoid arthritis*

|        |                                                           |
|--------|-----------------------------------------------------------|
| DG737D | Myopathy, arthritis rheumatoides                          |
| DI328A | Rheumatoid pericarditis                                   |
| DI398E | Rheumatoid endocarditis                                   |
| DI418A | Rheumatoid myocarditis                                    |
| DI528A | Rheumatoid carditis                                       |
| DJ990  | Rheumatoid lung disease                                   |
| DM05   | Seropositive rheumatoid arthritis                         |
| DM050  | Felty's syndrome                                          |
| DM050A | Arthritis rheumatoides med splenoadenomegali og leukopeni |
| DM051  | Rheumatoid lung disease                                   |
| DM051  | Reumatoid lungesygdom                                     |

## Protocol

|        |                                                             |
|--------|-------------------------------------------------------------|
| DM051A | Reumatoid arthritis med Caplans syndrom                     |
| DM051B | Effusio pleurae rheumatoides                                |
| DM051B | Reumatoid arthritis med pleural effusion                    |
| DM051C | Fibrosis pulmonis interstitialis diffusa rheumatoides       |
| DM051C | Reumatoid arthritis med interstitiel diffus lungefibrose    |
| DM051D | Pleuritis rheumatoides                                      |
| DM051D | Reumatoid arthritis med pleuritis                           |
| DM051E | Noduli rheumatici pulmonis                                  |
| DM051E | Reumatoid arthritis med noduli rheumatici pulmonis          |
| DM051F | Granuloma pulmonis rheumatoides                             |
| DM051F | Reumatoid arthritis med granulomer i lungerne               |
| DM052  | Rheumatoid vasculitis                                       |
| DM052  | Vasculitis rheumatoides                                     |
| DM052  | Reumatoid vaskulitis                                        |
| DM053  | Rheumatoid arthritis with involvement of oth organs and sys |
| DM053  | Arthritis rheumatoides med involvering af andre organsyst   |
| DM053  | Reumatoid arthritis med involvering af andre organsystemer  |
| DM053A | Arthritis rheumatoides med endocardit                       |
| DM053B | Arthritis rheumatoides med myocardit                        |
| DM053C | Arthritis rheumatoides med myopati                          |
| DM053D | Polyneuropathia rheumatoides                                |
| DM053E | Arthritis rheumatoides med pericardit                       |
| DM058  | Other seropositive rheumatoid arthritis                     |
| DM059  | Seropositive rheumatoid arthritis, unspecified              |
| DM060  | Seronegative rheumatoid arthritis                           |
| DM061  | Adult-onset Still's disease                                 |
| DM062  | Rheumatoid bursitis                                         |
| DM063  | Rheumatoid nodule                                           |
| DM068  | Other specified rheumatoid arthritis                        |
| DM069  | Rheumatoid arthritis, unspecified                           |
| DM080  | Juvenile rheumatoid arthritis                               |
| DM080A | Juvenil reumatoid arthritis med rheumafaktor                |
| DM080B | Arthritis juvenilis chronica uden rheumafaktor              |
| DM082  | Juvenile arthritis with systemic onset                      |
| DM082A | Stills sygdom med debut før det fyldte 16 år                |
| DM082B | Still's sygdom uden specifikation                           |
| DM083  | Juvenile polyarthritis (seronegative)                       |
| DM084  | Pauciarticular juvenile arthritis                           |

### *Lupus erythematosus*

|        |                                                           |
|--------|-----------------------------------------------------------|
| DL931  | Subacute cutaneous lupus erythematosus                    |
| DG058A | Encephalitis, systemisk lupus erythematosus               |
| DG737C | Myopathia, systemisk lupus erythematosus                  |
| DI328B | Pericarditis, systemisk lupus erythematosus               |
| DI398C | Endocarditis, Libman-Sacks, systemisk lupus erythematosus |
| DJ991C | Lungesygdom, systemisk lupus erythematosus                |



## Protocol

|        |                                                            |
|--------|------------------------------------------------------------|
| DL932  | Anden form for lokaliseret lupus erythematosus             |
| DL932A | Lupus erythematosus profundus                              |
| DL932B | Lupus panniculitis                                         |
| DL932C | Lupus erythematosus tumidus                                |
| DM32   | Systemic lupus erythematosus                               |
| DM320  | Systemisk lupus erythematosus forårsaget af lægemiddel     |
| DM321  | Systemisk lupus erythematosus med organinvolvering         |
| DM321A | Libman-Sacks' endocarditis (systemisk lupus erythematosus) |
| DM321B | Glomerulonephritis ved systemisk lupus erythematosus       |
| DM321C | Pleuritis ved systemisk lupus erythematosus                |
| DM321D | Polyserositis, systemisk lupus erythematosus               |
| DM321E | Lupus pericarditis                                         |
| DM328  | Systemisk lupus erythematosus, andre former                |
| DM329  | Systemisk lupus erythematosus UNS                          |
| DN085A | Glomerulonephropathia ved systemisk lupus erythematosus    |
| DN164B | Nephropathia tubulointerstit ved syst lupus erythematosus  |

### *Inflammatory bowel disease*

|        |                                              |
|--------|----------------------------------------------|
| DK50   | Crohn's sygdom                               |
| DK500  | Crohns sygdom i tyndtarmen                   |
| DK500A | Crohns sygdom i duodenum                     |
| DK500B | Crohns sygdom i ileum                        |
| DK500C | Crohns sygdom i jejunum                      |
| DK500D | Ileitis terminalis                           |
| DK501  | Crohns sygdom i tyktarmen                    |
| DK501A | Colitis granulomatosa                        |
| DK501B | Colitis regionalis                           |
| DK501C | Enteritis regionalis coli                    |
| DK501D | Enteritis regionalis recti                   |
| DK508  | Anden form for Crohns sygdom                 |
| DK508A | Crohns sygdom i både tyndtarmen og tyktarmen |
| DK508B | Enteritis regionalis, både tynd- og tyktarm  |
| DK508C | Crohns sygdom med forandringer i mundhulen   |
| DK508D | Crohns sygdom med ileocøkal lokalisering     |
| DK509  | Crohns sygdom UNS                            |
| DK51   | Ulcerøs colitis                              |
| DK510  | Ulcerøs pancolitis                           |
| DK511  | Ileocolitis (chronica) ulcerosa              |
| DK512  | Ulcerøs proktitis                            |
| DK512A | Proctitis haemorrhagica ulcerosa             |
| DK513  | Ulcerøs proktosigmoiditis                    |
| DK513A | Rectosigmoiditis haemorrhagica ulcerosa      |
| DK514  | Inflammatoriske polypper                     |
| DK515  | Venstresidig ulcerøs colitis                 |
| DK515A | Venstresidig proktocolitis                   |
| DK515B | Venstresidig hemicolitis                     |

## Protocol

|        |                                              |
|--------|----------------------------------------------|
| DK518  | Anden form for ulcerøs colitis               |
| DK518A | Pancolitis ulcerosa                          |
| DK518B | Ulcerøs colitis med forandringer i mundhulen |
| DK519  | Ulcerøs colitis UNS                          |
| DM074  | Arthritis enteropathica ved Crohn's sygdom   |
| DM075  | Artropati ved colitis ulcerosa               |
| DM091  | Juvenil arthritis ved Crohns sygdom          |
| DM092  | Juvenil arthritis ved ulcerøs colitis        |

### *Chronic obstructive pulmonary disease*

|        |                                                            |
|--------|------------------------------------------------------------|
| DJ41   | Kronisk bronkitis uden obstruktion                         |
| DJ410  | Simpel kronisk bronkitis                                   |
| DJ411  | Mukopurulent kronisk bronkitis                             |
| DJ418  | Blandet simpel og mukopurulent kronisk bronkitis           |
| DJ42   | Kronisk bronkitis ikke spec.                               |
| DJ429  | Kronisk bronkitis UNS                                      |
| DJ429A | Tracheobronchitis chronica                                 |
| DJ429B | Kronisk trakeitis                                          |
| DJ43   | Lungeemfysem                                               |
| DJ430  | Enkeltsidigt lungeemfysem                                  |
| DJ430A | Emphysema pulmonum unilaterale                             |
| DJ431  | Panlobulært lungeemfysem                                   |
| DJ431A | Panacinært emfysem                                         |
| DJ432  | Centrilobulært emfysem                                     |
| DJ438  | Anden form for lungeemfysem                                |
| DJ439  | Lungeemfysem UNS                                           |
| DJ439A | Bulløst lungeemfysem                                       |
| DJ44   | Kronisk obstruktiv lungesygdom                             |
| DJ440  | Kronisk obstr. lungesygd. m. akut nedre luftvejs infektion |
| DJ441  | Kronisk obstruktiv lungesygdom med akut eksacerbation UNS  |
| DJ448  | Anden form for kronisk obstruktiv lungesygdom              |
| DJ448A | Kronisk obstruktiv bronkitis                               |
| DJ448B | Kronisk astmatisk bronkitis                                |
| DJ448C | Kronisk bronkitis med emfysem                              |
| DJ449  | Kronisk obstruktiv lungesygdom UNS                         |

### *Asthma*

|        |                                       |
|--------|---------------------------------------|
| DJ45   | Astma                                 |
| DJ450  | Asthma bronchiale allergicum          |
| DJ450A | Erhvervsbetinget allergisk astma      |
| DJ451  | Asthma bronchiale non allergicum      |
| DJ451A | Erhvervsbetinget ikke-allergisk astma |
| DJ458  | Astma af blandet type                 |
| DJ459  | Astma UNS                             |
| DJ459A | Astmatisk bronkitis                   |
| DJ46   | Status astmaticus                     |
| DJ469  | Status asthmaticus UNS                |

## Protocol

### *Chronic kidney disease*

|         |                                                             |
|---------|-------------------------------------------------------------|
| DL298C  | Uræmisk kløe                                                |
| DG638A  | Neuropathia uraemica                                        |
| DE853B  | Amyloidosis ved hæmodialyse                                 |
| DT825A  | Malfunktion af a-v fistel                                   |
| DT825B  | Malfunktion af hæmodialyse kateter                          |
| DT825C  | Malfunktion af peritonealdialyse kateter                    |
| DT856C  | Complicatio katheterisationis intraperitonealis dialyseos   |
| DI120   | Morbus hypertensivus renalis med nyresvigt                  |
| DI131   | Morbus cordis et renalis hypertensivus med nyresvigt        |
| DI132   | Mb cordis et renalis hypertens med hjertesvigt og nyresvigt |
| DI770   | Erhvervet arteriovenøs fistel                               |
| DI770A  | Aneurysma varicosum                                         |
| DN165   | Nefropati ved afstødning af transplantat                    |
| DN180   | Terminal nyreinsufficiens                                   |
| DN183   | Kronisk nyreinsufficiens, stadie 3                          |
| DN184   | Kronisk nyreinsufficiens, stadie 4                          |
| DN185   | Kronisk nyreinsufficiens, terminal stadie 5                 |
| DN188   | Kronisk nyreinsufficiens, andre former                      |
| DN188A  | Neuropathia, uræmisk                                        |
| DN188B  | Pericarditis, uræmisk                                       |
| DN189   | Kronisk nyreinsufficiens UNS                                |
| DN19    | Nyreinsufficiens UNS                                        |
| DN199   | Uræmi uden specifikation                                    |
| DT824   | Complicatio katheterisationis vasorum dialyseos             |
| DT861   | Svigt eller afstødning af transplanteret nyre               |
| DT861A  | Insufficiencia transplantationis renis                      |
| DT861B  | Afstødning af nyretransplantat                              |
| DZ49    | Dialysebehandling                                           |
| DZ490   | Forbehandling m henblik på dialyse                          |
| DZ491   | Ekstracorporal dialyse                                      |
| DZ492   | Dialyse, anden                                              |
| DZ94    | Tilstand med transplanteret organ eller væv                 |
| DZ940   | Tilstand m transplanteret nyre                              |
| DZ940   | Nyretransplanteret                                          |
| DZ992   | Afhængighed af renal dialyse                                |
| DT817E1 | Lymphocele efter nyretransplantation                        |

### *Diabetes type 1 (used to identify subtypes)*

|        |                                           |
|--------|-------------------------------------------|
| DE10   | Type 1-diabetes                           |
| DE100  | Type 1-diabetes med koma                  |
| DE100A | Coma diabeticum, hyperosmolær ved IDDM    |
| DE100B | Coma diabeticum ved IDDM med ketoacidose  |
| DE100C | Coma diabeticum ved IDDM uden ketoacidose |
| DE100D | Coma diabeticum, hyperglykæmisk ved IDDM  |

## Protocol

|        |                                                              |
|--------|--------------------------------------------------------------|
| DE100E | Coma diabeticum, hypoglykæmisk ved IDDM                      |
| DE100F | Diabetes mellitus insulino dependente med coma diabeticum    |
| DE101  | Type 1-diabetes med ketoacidose                              |
| DE102  | Type 1-diabetes med nyrekomplikation                         |
| DE103  | Type 1-diabetes med øjenkomplikation                         |
| DE104  | Type 1-diabetes med neurologisk komplikation                 |
| DE105  | Type 1-diabetes med komplikationer i perifere karsystem      |
| DE105A | Type 1-diabetes med perifer angiopati                        |
| DE105B | Type 1-diabetes med fodsår                                   |
| DE105C | Type 1-diabetes med gangræn                                  |
| DE105D | Type 1-diabetes med mikroangiopati                           |
| DE106  | Type 1-diabetes med anden komplikation                       |
| DE107  | Type 1-diabetes med multiple komplikationer                  |
| DE108  | Type 1-diabetes med komplikation UNS                         |
| DE109  | Type 1-diabetes uden komplikationer                          |
| DE109A | Type 1-diabetes UNS                                          |
| DO240  | Graviditet, fødsel el. barsel m. forud best. type 1-diabetes |
| DO240A | Svangerskab med forud bestående type 1-diabetes              |
| DO240B | Fødsel med forud bestående type 1-diabetes                   |
| DO240C | Barsel med forud bestående type 1-diabetes                   |

### *Diabetes type 2 (used to identify subtypes)*

|        |                                                              |
|--------|--------------------------------------------------------------|
| DE11   | Type 2-diabetes                                              |
| DE110  | Type 2-diabetes med koma                                     |
| DE110A | Coma diabeticum ved NIDDM uden ketoacidose                   |
| DE110B | Coma diabeticum, hypoglykæmisk ved NIDDM                     |
| DE110C | Coma diabeticum, hyperosmolær ved NIDDM                      |
| DE110D | Coma diabeticum, hyperglykæmisk ved NIDDM                    |
| DE110E | Coma diabeticum ved NIDDM med ketoacidose                    |
| DE111  | Type 2-diabetes med ketoacidose                              |
| DE112  | Type 2-diabetes med nyrekomplikation                         |
| DE113  | Type 2-diabetes med øjenkomplikation                         |
| DE114  | Type 2-diabetes med neurologisk komplikation                 |
| DE115  | Type 2-diabetes med komplikationer i perifere karsystem      |
| DE115A | Type 2-diabetes med perifer angiopati                        |
| DE115B | Type 2-diabetes med fodsår                                   |
| DE115C | Type 2-diabetes med gangræn                                  |
| DE115D | Type 2-diabetes med mikroangiopati                           |
| DE116  | Type 2-diabetes med anden komplikation                       |
| DE117  | Type 2-diabetes med multiple komplikationer                  |
| DE118  | Type 2-diabetes med komplikation UNS                         |
| DE119  | Type 2-diabetes uden komplikationer                          |
| DE119A | Type 2-diabetes UNS                                          |
| DO241  | Graviditet, fødsel el. barsel m. forud best. type 2-diabetes |
| DO241A | Svangerskab med forud bestående type 2-diabetes              |
| DO241B | Fødsel med forud bestående type 2-diabetes                   |
| DO241C | Barsel med forud bestående type 2-diabetes                   |

## Protocol

### *HIV*

|        |                                                              |
|--------|--------------------------------------------------------------|
| DB20   | HIV sygdom medførende infektiøse og parasitære sygdomme      |
| DB200  | HIV-sygdom med mykobakteriel infektion                       |
| DB200A | HIV-sygdom med tuberkulose                                   |
| DB201  | HIV-sygdom med andre bakterielle sygdomme                    |
| DB202  | HIV-sygdom med cytomegalvirus sygdom                         |
| DB203  | HIV-sygdom med andre virus infektioner                       |
| DB204  | HIV-sygdom med candidiasis                                   |
| DB205  | HIV-sygdom med andre svampeinfektioner                       |
| DB206  | HIV-sygdom med Pneumocystis jirovecii pneumoni               |
| DB207  | HIV-sygdom med multiple infektioner                          |
| DB208  | HIV-sygdom med andre infektiøse og parasitære sygdomme       |
| DB209  | HIV-sygdom med infektiøs eller parasitær sygdom UNS          |
| DB21   | Humant immundefekt-virus (HIV) sygdom med neoplastisk sygdom |
| DB210  | HIV-sygdom med Kaposi's sarkom                               |
| DB210A | HIV-infektion med Kaposi sarkom                              |
| DB211  | HIV-sygdom med Burkitt's lymfom                              |
| DB212  | HIV-sygdom med andet non-Hodgkin's lymfom                    |
| DB213  | HIV-sygdom med anden neoplasi i lymfoidt og bloddannende væv |
| DB217  | HIV-sygdom med multiple neoplasier                           |
| DB218  | HIV-sygdom med anden neoplasi                                |
| DB219  | HIV sygdom med neoplasi UNS                                  |
| DB22   | HIV sygdom med andre specificerede sygdomme                  |
| DB220  | HIV-encefalopati                                             |
| DB220A | HIV-demens                                                   |
| DB221  | HIV-lymfoid interstitiel pneumonitis                         |
| DB222  | HIV-wasting syndrome                                         |
| DB227  | HIV-sygdom med multiple sygdomme klassificeret andetsteds    |
| DB23   | Andre tilstande ved HIV-sygdom                               |
| DB230  | Akut HIV-sygdom                                              |
| DB231  | HIV-sygdom med (persisterende) generaliseret lymfadenopati   |
| DB232  | HIV-sygdom med hæmatologiske og immunologiske forandr. IKA   |
| DB238  | Anden eller ikke specificeret symptomatisk HIV-sygdom        |
| DB238A | HIV-associeret lipodystrofi (HALS)                           |
| DB24   | HIV-sygdom og AIDS uden specificering                        |
| DB240  | HIV infektion, uden symptomer                                |
| DB249  | AIDS UNS                                                     |
| DF024  | Demens ved HIV-sygdom                                        |
| DF0240 | Demens ved HIV-sygdom uden andre symptomer                   |
| DF0241 | Demens ved HIV-sygdom med paranoide symptomer                |
| DF0242 | Demens ved HIV-sygdom med hallucinationer                    |
| DF0243 | Demens ved HIV-sygdom med depressive symptomer               |
| DF0244 | Demens ved HIV-sygdom med blandede symptomer                 |
| DZ21   | Asymptomatisk HIV-infektion                                  |
| DZ219  | Asymptomatisk HIV-infektion UNS                              |

## Protocol

### *Lymphoma*

|        |                                                            |
|--------|------------------------------------------------------------|
| DC81   | Hodgkin lymfomer                                           |
| DC810  | Nodulært lymfocyttdomineret Hodgkin lymfom                 |
| DC811  | Klassisk Hodgkin lymfom med nodulær sklerose               |
| DC812  | Klassisk Hodgkin lymfom med blandet cellularitet           |
| DC813  | Lymphoma Hodgkin 'lymphocytic depletion'                   |
| DC814  | Klassisk lymfocytrigt Hodgkin lymfom                       |
| DC817  | Andet klassisk Hodgkin lymfom                              |
| DC819  | Hodgkin lymfom UNS                                         |
| DC82   | Follikulære lymfomer                                       |
| DC820  | Follikulært lymfom, grad I                                 |
| DC821  | Follikulært lymfom, grad II                                |
| DC822  | Follikulært lymfom, grad III                               |
| DC825  | Diffust follikelcenter lymfom                              |
| DC826  | Kutant follikelcenter lymfom                               |
| DC827  | Andet follikulært lymfom                                   |
| DC829  | Follikulært lymfom UNS                                     |
| DC83   | Ikke-follikulære lymfomer                                  |
| DC830  | Småcellet B-celle lymfom                                   |
| DC830B | Lymfoplasmacytært lymfom                                   |
| DC830C | Nodalt marginalzonelymfom                                  |
| DC830D | Splenisk marginalzonelymfom                                |
| DC831  | Mantelcelle lymfom                                         |
| DC831A | Centrocytisk lymfom                                        |
| DC831B | Malign lymfomatøs polypose                                 |
| DC832  | Lymph mal non-Hodg af diff type mixed small and large cell |
| DC833  | Diffust storcellet B-celle lymfom                          |
| DC833A | Anaplastisk diffust storcellet B-celle lymfom              |
| DC833B | CD30-positivt diffust storcellet B-celle lymfom            |
| DC833C | Centroblastært diffust storcellet B-celle lymfom           |
| DC833D | Immunoblastært diffust storcellet B-celle lymfom           |
| DC833E | Plasmablastært diffust storcellet B-celle lymfom           |
| DC833F | T-cellerigt diffust storcellet B-celle lymfom              |
| DC834  | Lymphoma mal non-Hodgkin af diffus immunoblastær type      |
| DC835  | Lymfoblastært lymfom                                       |
| DC835A | Lymfoblastært B-celle lymfom                               |
| DC835B | Lymfoblastært T-celle lymfom                               |
| DC835C | Lymfoblastært lymfom UNS                                   |
| DC836  | Lymphoma mal non-Hodgkin af diffus udifferentieret type    |
| DC837  | Burkitt lymfom                                             |
| DC837A | Atypisk Burkitt lymfom                                     |
| DC837B | Burkitt-lignende lymfom                                    |
| DC838  | Andet ikke-follikulært lymfom                              |
| DC838A | Primært effusionslymfom (af B-celle type)                  |
| DC838B | Intravaskulært storcellet B-celle lymfom                   |
| DC839  | Ikke-follikulært (diffust) lymfom UNS                      |

## Protocol

|        |                                                              |
|--------|--------------------------------------------------------------|
| DC84   | Modne NK/T-celle lymfomer                                    |
| DC840  | Mycosis fungoides                                            |
| DC840A | Mycosis fungoides associeret med follikulær mucinose         |
| DC840B | Pagetoid retikulose                                          |
| DC840C | Granulomatøs slack skin (lymphoma malignum)                  |
| DC841  | Morbus Sézary                                                |
| DC842  | Lymphoma mal T-zone                                          |
| DC843  | Lymphoma mal lymfoepiteloidt                                 |
| DC844  | Perifert T-celle lymfom UNS                                  |
| DC844A | Storcellet Pleomorft CD30+ T-celle lymfom                    |
| DC844B | Storcellet Pleomorft CD30- T-celle lymfom                    |
| DC844C | Storcellet immunoblastisk CD30+ T-celle lymfom               |
| DC844D | Storcellet immunoblastisk CD30- T-celle lymfom               |
| DC844E | Middel-småcellet pleomorft T-celle lymfom                    |
| DC844F | Lymfoepiteloidt lymfom                                       |
| DC844H | Modent T-celle lymfom UNS                                    |
| DC845  | Andet modent NK/T-celle lymfom                               |
| DC845A | Storcellet anaplastisk CD30+ T-celle lymfom                  |
| DC845B | Storcellet anaplastisk CD30+ T-celle lymfom, primært i huden |
| DC845C | Subkutant pannikulitrelateret T-lymfom                       |
| DC845D | Angiocentrisk T-/NK-celle lymfom                             |
| DC846  | Anaplastisk storcellet lymfom, ALK-positivt                  |
| DC846A | Anaplastisk storcellet lymfom, CD30-positivt                 |
| DC847  | Anaplastisk storcellet lymfom, ALK-negativt                  |
| DC848  | Kutant T-celle lymfom UNS                                    |
| DC849  | Modent NK/T-celle lymfom UNS                                 |
| DC85   | Andre og ikke specificerede non-Hodgkin lymfomer             |
| DC850  | Lymphosarcoma                                                |
| DC851  | B-celle lymfom UNS                                           |
| DC851A | Follikelcenter B-celle lymfom                                |
| DC851B | Marginal zone B-celle lymfom (immunocytom)                   |
| DC851C | Diffust storcellet B-celle lymfom                            |
| DC851D | T-cellerigt B-celle lymfom                                   |
| DC851E | Storcellet intravaskulært B-celle lymfom                     |
| DC852  | Mediastinalt (tymisk) storcellet B-celle lymfom              |
| DC857  | Andet non-Hodgkin lymfom                                     |
| DC857A | Reticulosis lymphatica follicularis                          |
| DC857B | Polymorf posttransplantations lymfoproliferativ sygd. (PTLD) |
| DC859  | Lymfom (neoplasi) UNS                                        |
| DC859A | Malignt lymfom uden specifikation                            |
| DC859B | Lymfom uden specifikation                                    |
| DC86   | Andre NK/T-celle lymfomer                                    |
| DC860  | Ekstranodalt NK/T-celle lymfom, nasal type                   |
| DC861  | Hepatosplenisk T-celle lymfom                                |
| DC862  | Enteropati-type (intestinalt) T-celle lymfom                 |
| DC863  | Subkutant panniculitis-lignende T-celle lymfom               |

## Protocol

|        |                                                              |
|--------|--------------------------------------------------------------|
| DC864  | Blastisk NK-celle lymfom                                     |
| DC865  | Angioimmunoblastært T-celle lymfom                           |
| DC866  | Primært kutane CD30-positive T-celle proliferationer         |
| DC866A | Lymfomatoid papulose                                         |
| DC866B | Primært kutant anaplastisk storcellet lymfom                 |
| DC866C | Primært kutant CD30-positivt storcellet lymfom               |
| DC88   | Maligne immunoproliferative sygdomme                         |
| DC880  | Waldenströms makroglobulinæmi                                |
| DC881  | Paraproteinaemia alpha heavy chain                           |
| DC882  | Anden heavy chain disease                                    |
| DC882A | Gamma heavy chain disease                                    |
| DC882B | My heavy chain disease                                       |
| DC883  | Neopl mal immunoproliferativum intestini tenuis              |
| DC883A | Alpha heavy chain disease                                    |
| DC883B | Middelhavs lymfom                                            |
| DC884  | Ekstranodalt marginalzone B-celle lymfom                     |
| DC884A | Lymfom af mucosa-associeret lymfoidt væv (MALT-lymfom)       |
| DC884B | Lymfom af hud-associeret lymfoidt væv (SALT-lymfom)          |
| DC884C | Lymfom af bronkie-associeret lymfoidt væv (BALT-lymfom)      |
| DC887  | Anden malign immunoproliferativ sygdom                       |
| DC889  | Malign immunoproliferativ sygdom UNS                         |
| DC96   | An/ikke-spec maligne neoplasier fra lymfoidt/hæmatopoidt væv |
| DC960  | Multifokal og multisyst. Langerhans-celle histiocytosis      |
| DC960A | Histiocytosis X, multisystemisk                              |
| DC961  | Histiocytosis maligna                                        |
| DC962  | Malign mastcelle tumor                                       |
| DC962B | Mastcelle sarkom                                             |
| DC963  | Lymphoma mal histiocycticum verum                            |
| DC964  | Dendritcelle sarkom (accessoriske celler)                    |
| DC964A | Interdigiterende dendritcelle sarkom                         |
| DC964B | Langerhans-celle sarkom                                      |
| DC964C | Follikulært dendritcelle sarkom                              |
| DC965  | Multifokal og unisystemisk Langerhans-celle histiocytose     |
| DC965A | Hand-Schüller-Christian sygdom                               |
| DC965B | Histiocytosis X, multifokal                                  |
| DC966  | Unifokal Langerhans-celle histiocytose                       |
| DC966A | Eosinofilt granulom                                          |
| DC966B | Histiocytosis X, unifokal                                    |
| DC966C | Histiocytosis X UNS                                          |
| DC966D | Langerhans-celle histiocytose UNS                            |
| DC967  | Anden malign neoplasi fra lymfoidt eller hæmatopoietisk væv  |
| DC967A | Histiocytært sarkom                                          |
| DC968  | Malign histiocytose UNS                                      |
| DC969  | Malign neoplasi fra lymfoidt eller hæmatopoietisk væv UNS    |

### *Leukaemia*

|      |                      |
|------|----------------------|
| DC91 | Lymfatiske leukæmier |
|------|----------------------|



## Protocol

|        |                                                              |
|--------|--------------------------------------------------------------|
| DC910  | Akut lymfoblastær leukæmi (ALL)                              |
| DC911  | Leukaemia lymphatica chronica                                |
| DC911A | Lymfoplasmacytær leukæmi                                     |
| DC911B | Richter syndrom                                              |
| DC912  | Leukaemia lymphatica subacuta                                |
| DC913  | Leukaemia prolymphocytica                                    |
| DC914  | Hårcele leukæmi                                              |
| DC914A | Reticuloendotheliosis leucaemica                             |
| DC915  | Leukaemia T-lymfocytær hos voksne                            |
| DC915A | Adult T-celle lymfom/leukæmi (HTLV-1-assoc.), akut variant   |
| DC915B | Adult T-celle lymfom/leukæmi (HTLV-1-assoc.), kron. Variant  |
| DC915C | Adult T-celle lymfom/leukæmi (HTLV-1-assoc), lymfomatoid var |
| DC915D | Adult T-celle lymfom/leukæmi (HTLV-1-assoc), smouldering var |
| DC916  | Prolymfocyt leukæmi af T-celle type                          |
| DC917  | Leukaemia lymphatica anden form                              |
| DC917A | Leukaemia aleukaemica lymphatica                             |
| DC917B | Large granular T-celle lymfocytær leukæmi                    |
| DC918  | Moden B-celle leukæmi af Burkitt-type                        |
| DC919  | Leukaemia lymphatica uden specifikation                      |
| DC92   | Myeloide leukæmier                                           |
| DC920  | Leukaemia myeloblastica acuta                                |
| DC920A | Akut myeloblastær leukæmi med minimal differentiering        |
| DC920B | Akut myeloblastær leukæmi med modning                        |
| DC920C | Akut myeloblastær leukæmi, AML1/ETO                          |
| DC920D | Akut myeloblastær leukæmi, AML M0                            |
| DC920E | Akut myeloblastær leukæmi, AML M1                            |
| DC920F | Akut myeloblastær leukæmi, AML M2                            |
| DC920G | Akut myeloblastær leukæmi, AML med t(8;21)                   |
| DC920H | Akut myeloblastær leukæmi UNS (uden FAB-klassificering)      |
| DC920J | Refraktær anæmi m overskud af blaster i transformation       |
| DC921  | Leukaemia myeloides chronica                                 |
| DC921A | Kronisk myeloid leukæmi med blastkrise                       |
| DC922  | Leukaemia myeloides subacuta                                 |
| DC923  | Myeloidt sarkom                                              |
| DC923A | Chloroma                                                     |
| DC923B | Granulocytært sarkom                                         |
| DC924  | Leukaemia promyelocytica                                     |
| DC924A | Akut myeloblastær leukæmi M3 med t(15;17) og varianter       |
| DC925  | Leukaemia myelomonocytica acuta                              |
| DC925A | Akut myeloblastær leukæmi M4 Eo med inv(16) eller t(16;16)   |
| DC926  | Akut myeloblastær leukæmi med 11q23-abnormalitet             |
| DC926A | Akut myeloblastær leukæmi med variation af MLL-gen           |
| DC927  | Leukaemia myeloides anden form                               |
| DC927A | Leukaemia aleukaemica myeloides                              |
| DC927B | Kronisk neutrofil leukæmi                                    |
| DC928  | Akut myeloid leukæmi med multilinje dysplasi                 |

## Protocol

|        |                                                        |
|--------|--------------------------------------------------------|
| DC929  | Leukaemia myeloides uden specifikation                 |
| DC93   | Monocytære leukæmier                                   |
| DC930  | Leukaemia monocytica acuta                             |
| DC930A | Akut monoblastær, AML M5a                              |
| DC930B | Akut monoblastær, AML M5b                              |
| DC931  | Leukaemia monocytica chronica                          |
| DC931A | Kronisk myelomonocytær leukæmi, CMML-1                 |
| DC931B | Kronisk myelomonocytær leukæmi, CMML-2                 |
| DC931C | Kronisk myelomonocytær, CMML med eosinofili            |
| DC932  | Leukaemia monocytica subacuta                          |
| DC933  | Juvenil myelomonocytær leukæmi                         |
| DC937  | Leukaemia monocytica anden form                        |
| DC939  | Monocytær leukæmi UNS                                  |
| DC94   | Leukæmi, anden spec                                    |
| DC940  | Akut erytroid leukæmi, M6 (a)(b)                       |
| DC940A | Erytroleukæmi UNS                                      |
| DC941  | Erythroleukaemia chronica                              |
| DC942  | Leukaemia megakaryoblastica acuta                      |
| DC943  | Mastcelle leukæmi                                      |
| DC943A | Mastcelleleukæmi                                       |
| DC944  | Panmyelosis acuta                                      |
| DC945  | Myelofibrosis acuta                                    |
| DC946  | Uklassificerbar myelodysplasi/myeloproliferativ sygdom |
| DC947  | Leukaemia anden spec form                              |
| DC947A | Leukaemia eosinophila                                  |
| DC947B | Aggressiv NK-celle leukæmi                             |
| DC947C | Akut basofil leukæmi                                   |
| DC95   | Leukæmi uden specifikation                             |
| DC950  | Leukaemia acuta uden specifikation                     |
| DC950A | Blastcelleleukæmi                                      |
| DC950B | Leukaemia acuta, stamcelleleukæmi                      |
| DC950C | Akut bilineær leukæmi                                  |
| DC950D | Akut leukæmi af blandet linearitet                     |
| DC951  | Leukaemia chronica uden specifikation                  |
| DC952  | Leukaemia subacuta uden specifikation                  |
| DC957  | Leukaemia anden form uden specifikation                |
| DC959  | Leukaemia uden specifikation                           |

### *Myeloma*

|        |                                |
|--------|--------------------------------|
| DC90   | Maligne plasmacelle neoplasier |
| DC900  | Myelomatose                    |
| DC901  | Plasmacelle leukæmi            |
| DC902  | Plasmacytoma extramedullare    |
| DC902A | Myeloma solitarium             |
| DC903  | Solitært ossøst plasmacytom    |

### *Stem cell transplantation*

## Protocol

|         |                                                                                                                                                                                                       |
|---------|-------------------------------------------------------------------------------------------------------------------------------------------------------------------------------------------------------|
| DT860   | Afstødning af knoglemarvstransplantat                                                                                                                                                                 |
| DT860A  | Graft-versus-host reaction                                                                                                                                                                            |
| DZ948C  | Knoglemarvstransplanteret                                                                                                                                                                             |
| DZ948C1 | Tilstand med transplanteret knoglemarv, alloge                                                                                                                                                        |
| DZ948C2 | Knoglemarvstransplanteret med autolog knoglemarv                                                                                                                                                      |
| DZ948   | If not DZ948A, DZ948B, DZ948C and if coded as a B-diagnosis or additional diagnosis together with one of the following A-diagnoses C770, C81–C96, D45–D47, D50–D85, D87–D89, T86.0, T86.0A, or T88.8N |

### *Solid organ transplantation*

|        |                                                    |
|--------|----------------------------------------------------|
| DT862  | Svigt eller afstødning af transplanteret hjerte    |
| DT862A | Svigt af hjertettransplantat                       |
| DT862B | Afstødning af hjertettransplantat                  |
| DT863  | Svigt eller afstødning af hjerte-lungetransplantat |
| DT863A | Svigt af hjerte-lungetransplantat                  |
| DT863B | Afstødning af hjerte-lungetransplantat             |
| DT864  | Svigt eller afstødning af transplanteret lever     |
| DT864A | Svigt af levertransplantat                         |
| DT864B | Afstødning af levertransplantat                    |
| DT868B | Svigt af transplanteret tyndtarm                   |
| DT868D | Svigt af transplanteret pankreas                   |
| DT868E | Svigt af transplanteret lunge                      |
| DT868G | Afstødning af transplanteret tyndtarm              |
| DT868I | Afstødning af transplanteret pankreas              |
| DT868J | Afstødning af transplanteret lunge                 |
| DZ941  | Hjertettransplanteret                              |
| DZ942  | Lungetransplanteret                                |
| DZ943  | Hjerte-lungetransplanteret                         |
| DZ944  | Levertransplanteret                                |
| DZ948A | Pancreastransplanteret                             |
| DZ948B | Tyndtarmstransplanteret                            |

### *Other immunosuppressive disease*

|        |                                                              |
|--------|--------------------------------------------------------------|
| DD611  | Aplastisk anæmi, medicininduceret                            |
| DD612  | Aplastisk anæmi forårsaget af anden ydre påvirkning          |
| DD613  | Idiopatisk aplastisk anæmi                                   |
| DD618  | Anden aplastisk anæmi                                        |
| DD619  | Aplastisk anæmi UNS                                          |
| DD619A | Pancytopeni UNS                                              |
| DD619B | Hypoplastisk anæmi UNS                                       |
| DD619C | Medullær hypoplasi                                           |
| DD619D | Panmyelophthisis                                             |
| DD81   | Kombinerede immundefekter                                    |
| DD810  | Svær kombineret immundefekt (SCID) med retikulær dysgenesi   |
| DD811  | Svær kombineret immundefekt (SCID), lavt antal T-/B-celler   |
| DD812  | Svær kombineret immundefekt (SCID), lavt/norm antal B-celler |
| DD813  | Adenosindeaminase (ADA) mangel                               |

## Protocol

|        |                                                             |
|--------|-------------------------------------------------------------|
| DD814  | Nezelofs syndrom                                            |
| DD815  | Purinnukleosidfosforylase (PNP) mangel                      |
| DD816  | Histokompatibilitetskompleksmangel, klasse I                |
| DD817  | Histokompatibilitetskompleksmangel, klasse II               |
| DD818  | Anden kombineret immundefekt                                |
| DD819  | Kombineret immundefekt UNS                                  |
| DD819A | Svær kombineret immundefekt (SCID) UNS                      |
| DD820  | Wiskott-Aldrichs syndrom                                    |
| DD821  | Di Georges syndrom                                          |
| DD821A | Aplasia thymi med immundefekt                               |
| DD822  | Immundefekt med korte ekstremiteter                         |
| DD83   | Almindelige variable immundefekter                          |
| DD830  | Immundefekt med overvejende abnormt B-celletal og -funktion |
| DD831  | Immundefekt med overvejende forstyrrelse i T-celler         |
| DD832  | Immundefekt med autoantistoffer mod B- eller T-celler       |
| DD838  | Anden almindelig variabel immundefekt                       |
| DD839  | Almindelig variabel immundefekt UNS                         |

## Protocol

**Table 2. International classification of diseases (ICD) version 8 codes**

### *Depression*

|        |                                               |
|--------|-----------------------------------------------|
| 296.09 | Melancholia involutionis                      |
| 296.29 | Psychosis manio-depressiva, typus depressivus |
| 296.99 | Psychosis manio-depressiva                    |
| 298.09 | Psychosis reactiva depressiva                 |
| 300.49 | Neurosis depressiva                           |
| 295.79 | Schizophrenia, typus schizo-affectivus        |
| 300.19 | Neurosis hysterica                            |

### *Anxiety*

|        |                  |
|--------|------------------|
| 300.09 | Neurosis anxiosa |
| 300.29 | Neurosis phobica |

### *Rheumatoid arthritis*

|        |                                                                         |
|--------|-------------------------------------------------------------------------|
| 712.09 | Arthritis rheumatoides juvenilis (Morbus Still)                         |
| 712.19 | Arthritis rheumatoides cum splenomegalia et leukopenia (Syndroma Felty) |
| 712.29 | Arthritis palindromica                                                  |
| 712.39 | Arthritis rheumatoides alia et non specificata                          |
| 712.59 | Fibrositis rheumatoides chronica nodularis                              |

### *Lupus erythematosus*

|        |                                  |
|--------|----------------------------------|
| 734.19 | Lupus erythematosus disseminatus |
|--------|----------------------------------|

### *Inflammatory bowel disease*

|        |                                               |
|--------|-----------------------------------------------|
| 563.01 | Enteritis regionalis granulomatosa (Crohn)    |
| 563.19 | Colitis ulcerosa, proctocolitis haemorrhagica |
| 569.04 | Proctitis haemorrhagica                       |

### *Chronic obstructive pulmonary disease*

|        |                                           |
|--------|-------------------------------------------|
| 491    | Bronchitis chronica                       |
| 491.00 | Bronchitis chronica non purulenta         |
| 491.01 | Bronchitis chronica purulenta             |
| 491.02 | Bronchitis chronica cum emphysemate       |
| 491.03 | Bronchitis chronica asthmatica            |
| 491.04 | Tracheobronchitis chronica                |
| 491.08 | Bronchitis chronica alia definita         |
| 491.09 | Bronchitis chronica                       |
| 492    | Emphysema pulmonum                        |
| 492.00 | Emphysema pulmonum generalisatum          |
| 492.01 | Emphysema pulmonum localisatum (bullosum) |
| 492.08 | Emphysema pulmonum aliud definitum        |
| 492.09 | Emphysema pulmonum                        |

### *Asthma*

|     |        |
|-----|--------|
| 493 | Asthma |
|-----|--------|

## Protocol

|        |                                           |
|--------|-------------------------------------------|
| 493.00 | Asthma bronchiale                         |
| 493.01 | Status asthmaticus                        |
| 493.02 | Asthma bronchiale cum rhinitide allergica |
| 493.08 | Asthma aliud definitum                    |
| 493.09 | Asthma                                    |

### *Chronic kidney disease*

|        |                                          |
|--------|------------------------------------------|
| 584    | Sclerosis renalis                        |
| 792    | Uraemia                                  |
| 997.7  | Complicatio post transplantationem renis |
| Y95.09 | Transplantatio renis                     |

### *Diabetes type I*

|        |                                                                            |
|--------|----------------------------------------------------------------------------|
| 249    | Diabetes mellitus, Insulino dependente                                     |
| 249.00 | Diabetes mellitus, insulino dependente, sine complicatione                 |
| 249.01 | Cataracts, retinopathia diabetics. insulino dependente                     |
| 249.02 | Nepbrophathia diabetics, syndroma K.immelstiel-Wilson, insulino dependente |
| 249.03 | Neuropathia, polyneuritis wabetica, insulino dependente                    |
| 249.04 | Angiopathia diabetics extremitatum. insulino dependente                    |
| 249.05 | Gangraena diabetics. insulino dependente                                   |
| 249.06 | Coma diabeticum sine ketonuria, insulino dependente                        |
| 249.07 | Coma (inclusum praecoma) diabeticum, insulino dependente                   |
| 249.08 | Diabetes mellitus, insulino dependente, cum complicatione alia delinita    |
| 249.09 | Diabetes mellitus, insulino dependente                                     |

### *Diabetes type II*

|        |                                                                               |
|--------|-------------------------------------------------------------------------------|
| 250    | Diabetes mellitus, Inaulino Independente                                      |
| 250.00 | Diabetes mellitus, insulino independente, sine complicatione                  |
| 250.01 | Cataracta, retinopatbia diabetics, insulino independente                      |
| 250.02 | Nepbrophathia diabetics, syndroma K.immelstiel-Wi.lson, insulino independente |
| 250.03 | Neuropathia, polyneuritis diabetica, insulino independente                    |
| 250.04 | Angiopathia diabetics ex.tremitatum, insulino independente                    |
| 250.05 | Gangra.ena diabetics, insulino independente                                   |
| 250.06 | Coma dlabeticum sine ketonuria, insulino independente                         |
| 250.07 | Coma (inclusum praecoma) diabeticum, insulino indepeodente                    |
| 250.08 | Diabetes mellitus, insulino independente, cum complicatione alia definita     |
| 250.09 | Diabetes mellitus, insulino independente                                      |

### *HIV*

|        |                                      |
|--------|--------------------------------------|
| 079.83 | AIDS (Erhvervet immundefekt syndrom) |
|--------|--------------------------------------|

### *Lymphoma*

|        |                                   |
|--------|-----------------------------------|
| 200    | Retliculosarcoma et lymphosarcoma |
| 200.09 | Reticulosarcoma                   |
| 200.19 | Lymphosarcoma                     |

## Protocol

|        |                                                          |
|--------|----------------------------------------------------------|
| 201    | Lymphogranulomatosis maligne Hodgkin                     |
| 201.99 | Lymphogranulomatosis maligna Hodgkin                     |
| 202    | Neoplasmata alia telae lymphaticae                       |
| 202.09 | Lymphoma giganto-folliculare Brili-Symer                 |
| 202.19 | Mycosis fungoides                                        |
| 202.29 | Neoplasma malignum primarium telae lymphaticae aliae     |
| 202.99 | Lymphomata alia definita                                 |
| 202.20 | Neoplasma malignum lienis primarium                      |
| 202.90 | Neoplasma benignum sive non specificatum medullae osseae |

### *Leukaemia*

|        |                                     |
|--------|-------------------------------------|
| 204    | Leukaemia lymphatica                |
| 204.09 | Leukaemia lymphatica acuta          |
| 204.19 | Leukaemia lymphatica chronica       |
| 204.99 | Leukaemia lymphatica                |
| 205    | Leukaemia myeloides                 |
| 205.09 | Leukaemia myeloides acuta           |
| 205.19 | Leukaemia myeloides chronica        |
| 205.99 | Leukaemia myeloides                 |
| 206    | Leukaemia monocytica                |
| 206.09 | Leukaemia monocytica acuta          |
| 206.19 | Leukaemia monocytica chronica       |
| 206.99 | Leukaemia monocytica                |
| 207    | Leukaemia alia alva non specificata |
| 207.09 | Leukaemia acuta (stamcelleleukaemi) |
| 207.19 | Leukaemia chronica                  |
| 207.29 | Erythroleukaemia (Di Guglielmo)     |
| 207.99 | Leukaemia non specificata           |

### *Myeloma*

|        |                                 |
|--------|---------------------------------|
| 203    | Myelomatosis, myeloma multiplex |
| 203.99 | Myelomatosis                    |

### *Solid organ transplantation*

|        |                                      |
|--------|--------------------------------------|
| Y95.49 | Transplantatio pancreatis            |
| Y95.89 | Transplantatio alia definita         |
| 997.79 | Complicatio transplantationis organi |

### *Other immunosuppressive disease*

|        |                                        |
|--------|----------------------------------------|
| 284.01 | Anaemia aplastica acquisita primaria   |
| 284.02 | Anaemia aplastica acquisita secundaria |
| 284.08 | Anaemia aplastica alia definita        |
| 284.09 | Anaemia aplastica                      |
| 758.30 | Aplasia thymi                          |

## Protocol

**Table 3. Anatomical Therapeutic Chemical Classification System codes**

### *Antidepressants*

|                                       |
|---------------------------------------|
| N06AA                                 |
| N06AB                                 |
| N06AF                                 |
| N06AG                                 |
| N06AX (excluding N06AX05 and N06AX12) |
| N06CA01                               |
| N06CA02                               |
| N06CA03                               |

### *Antidiabetics*

|                          |
|--------------------------|
| A10A                     |
| A10B (excluding A10BE01) |
| B04AX07                  |
| C10AX04                  |

### *Inhaled corticosteroids*

|         |
|---------|
| R03BA*  |
| R03AK06 |
| R03AK07 |
| R03AK08 |
| R03AK09 |
| R03AK10 |
| R03AK11 |

### *Oral corticosteroids*

|                               |
|-------------------------------|
| H02AB* (excluding injections) |
|-------------------------------|

### *Other immunosuppressants*

|         |
|---------|
| L01*    |
| L04*    |
| V02CA01 |
| V02CA02 |



## Protocol

**Table 4. NOMESCO surgical codes**

### *Chronic kidney disease*

|        |                                                             |
|--------|-------------------------------------------------------------|
| KJAK10 | Laparotomi med indlæggelse af kateter til peritonealdialyse |
| KJAK11 | Laparoskopisk indl. af kateter til peritonealdialyse        |
| KJAK13 | Laparotomi m. omlejring af peritonealt dialysekateter       |
| KJAK14 | Laparoskopisk omlejring af peritonealt dialysekateter       |
| KTJA30 | Perkutan indlæggelse af kateter til peritonealdialyse       |
| KTJA32 | Omljring af peritoneal dialyse kateter (ikke operativt)     |
| KTJA35 | Fjernelse af peritonealdialyse kateter                      |
| KKAS   | Nyretransplantationer og op. i forbindelse hermed           |
| KKAS00 | Autolog nyretransplantation                                 |
| KKAS10 | Allogen nyretransplantation m. nyre fra kadaverdonor        |
| KKAS20 | Allogen nyretransplantation m. nyre fra levende donor       |
| KKAS40 | Excision af transplanteret nyre                             |
| KKAS41 | Perkut. endoskopisk excision af transplanteret nyre         |
| KKAS50 | Pyelocystotomi på transplanteret nyre                       |
| KKAS60 | Operation for lymfocele v. transplanteret nyre              |
| KKAS61 | Perkut. endoskop. op. for lymfocele v. transplanteret nyre  |
| KKAS70 | Uretertransposition til transplanteret urinleder/nyrebækken |
| KKAS96 | Anden operation i forbindelse m. nyretransplantation        |
| KKAS97 | An. perkut. endoskop. op. i forb. m. nyretransplant.        |

### *Solid organ transplanatation*

|        |                                                              |
|--------|--------------------------------------------------------------|
| KFQ    | Transplantationer af hjerte og lunger                        |
| KFQA   | Transplantationer af hjerte                                  |
| KFQA00 | Ortotop hjertetransplantation                                |
| KFQA10 | Ortotop hjertetransplantation m. bicaval anastom.            |
| KFQA20 | Ortotop hjertetranspl./rekonstr.af forbind. til atr./sys-vv. |
| KFQA30 | Heterotop hjertetransplantation                              |
| KFQA40 | Hjertetransplantation med levende donor                      |
| KFQA96 | Anden transplantation af hjerte                              |
| KFQB   | Transplantationer af hjerte og lunger                        |
| KFQB00 | Hjerte-lungetransplantation                                  |
| KFQB10 | Hjerte-lungetransplantation m. bicaval anastom.              |
| KFQB20 | Hjerte-lungetransplant./rekonstr. af forbind. atr/syst-vv.   |
| KFQB30 | Hjerte-lungetransplant./revaskularis. af bronkial-arterier   |
| KFQB96 | Anden transplantation af hjerte og lunge                     |
| KFQW   | Andre op. v. transplantation af hjerte og lunger             |
| KFQW96 | Anden procedure v. transplantation af hjerte og lunger       |
| KGDG   | Lungetransplantationer                                       |
| KGDG00 | Transplantation af enkelt lunge                              |
| KGDG03 | Transplant., en lunge m. revaskularisering af bronkial-art.  |
| KGDG10 | Transplantation af begge lunger                              |
| KGDG13 | Enbloc transplant., lunger m.revaskular. af bronkial-art.    |

## Protocol

|         |                                                              |
|---------|--------------------------------------------------------------|
| KGDG30  | Lungetransplantation fra levende donor                       |
| KGDG96  | Anden lungetransplantation                                   |
| KGDG99  | Lungetransplantation, anden                                  |
| KJLE    | Transplantationer af pancreas og op. i forb. Hermed          |
| KJLE00  | Allo-total transplant. af pancreas m. pankreatikocystostomi  |
| KJLE03  | Allo-total transplant. af pancreas m. pankreatikoenterostomi |
| KJLE10  | Allogen segmental transplantation af pancreas                |
| KJLE16  | Allo-segmental transplant. af pancreas fra levende donor     |
| KJLE20  | Allogen ø-celle transplantation                              |
| KJLE30  | Xenogen ø-celle transplantation                              |
| KJLE40  | Total excision af transplanteret pancreas                    |
| KJLE50  | Okklusion af pancreasgang på transplanteret pancreas         |
| KJLE56  | Omlægn. af pankreatikocystostomi til pankreatikoenterostomi  |
| KJLE96  | An. pancreastranspl. el. op. i forb. Hermed                  |
| KJLE99  | Pancreastransplant. og dermed relaterede operationer, anden  |
| KJJC    | Levertransplantation og op. i forbindelse hermed             |
| KJJC00  | Allogen levertransplantation                                 |
| KJJC10  | Allogen partiel levertransplantation                         |
| KJJC20  | Allogen partiel levertransplantation fra levende donor       |
| KJJC30  | Xenogen levertransplantation                                 |
| KJJC40  | Xenogen partiel levertransplantation                         |
| KJJC50  | Resektion af donorlever i forbindelse m. transplantation     |
| KJJC60  | Fjernelse af transplanteret lever                            |
| KJJC96  | An. levertransplantation el. op. i forb. Hermed              |
| KJJC96A | Bench kirurgi (back-table kirurgi) mhp. Leverimplantation    |

## Protocol

**Table 5. Procedure codes**

*Chronic kidney disease*

|         |                                                        |
|---------|--------------------------------------------------------|
| BJFD2   | Dialyse ved kronisk nyresygdom                         |
| BJFD20  | Hæmodialyse ved kronisk nyresygdom                     |
| BJFD21  | Kontinuerlig ambulant peritonealdialyse, CAPD          |
| BJFD22  | Intermitterende peritonealdialyse, IPD                 |
| BJFD23  | Natlig peritonealdialyse, NPD                          |
| BJFD24  | Kontinuerlig cyklisk peritonealdialyse, CCPD           |
| BJFD25  | Daglig ambulant peritonealdialyse, DAPD                |
| BJFD26  | Hæmodiafiltration                                      |
| BJFD27  | Automatisk peritonealdialyse, APD                      |
| BJFZ    | Delprocedurer ved dialysebehandling                    |
| BJFZ0   | Tilslutning af dialyseapparat til patient              |
| BJFZ00  | Tilslutning af hæmodialyseapparat til patient          |
| BJFZ01  | Tilslutning af peritonealdialyseapparat til patient    |
| BJFZ1   | Fjernelse af dialyseapparat fra patient                |
| BJFZ10  | Fjernelse af hæmodialyseapparat fra patient            |
| BJFZ11  | Fjernelse af peritonealdialyseapparat fra patient      |
| BJFZ4   | Delprocedure vedrørende dialysekateter                 |
| BJFZ40  | Anlæggelse af hæmodialysekateter                       |
| BJFZ40A | Anlæggelse af tunnelleret hæmodialysekateter           |
| BJFZ41  | Skift af hæmodialysekateter                            |
| BJFZ41A | Skiftning af tunnelleret hæmodialysekateter            |
| BJFZ42  | Skylning af hæmodialysekateter                         |
| BJFZ43  | Fjernelse af hæmodialysekateter                        |
| BJFZ43A | Fjernelse af tunnelleret hæmodialysekateter            |
| BJFZ44  | Omlægning af hæmodialysekateter                        |
| BJFZ45  | Anlæggelse af peritonealdialysekateter                 |
| BJFZ46  | Skift af peritonealdialysekateter                      |
| BJFZ47  | Skylning af peritonealdialysekateter                   |
| BJFZ48  | Fjernelse af peritonealdialysekateter                  |
| BJFZ49  | Omlægning af peritonealdialysekateter                  |
| BJFZ4A  | Tætning af peritoneal dialysekateter uden omlægning    |
| BJFZ5   | Procedure vedrørende dialysekateter                    |
| BJFZ50  | Skift af hæmodialysekateter                            |
| BJFZ51  | Skylning af hæmodialysekateter                         |
| BJFZ52  | Skift af peritonealdialysekateter                      |
| BJFZ53  | Skylning af peritonealdialysekateter                   |
| BJFZ6   | Slangeskift ved dialysebehandling                      |
| BJFZ60  | Slangeskift ved peritonealdialysekateter               |
| BJFZ9   | Tilpasning af dialyseapparat til patient               |
| BJFZ90  | Programmering af kort til individuel dialysebehandling |

## Protocol

|          |                                                             |
|----------|-------------------------------------------------------------|
| BJFZ91   | Justering af individuel dialysebehandling                   |
| BJKB     | Pædagogiske handlinger i relation til dialyse               |
| BJKB0    | Oplæring i brug af kronisk peritonealdialyse, CAPD          |
| BJKB1    | Oplæring i brug af maskine til peritonealdialyse            |
| BJKB2    | Oplæring i brug af maskine til hæmodialyse                  |
| BUBA2    | Hæmodialysediæt                                             |
| BUFC1    | Diætvejledning ved dialysebehandling                        |
| BUFC10   | Initial diætvejledning ved dialyse                          |
| BUFC11   | Opfølgende diætvejledning ved dialyse                       |
| BWDC5    | Tilsætning af medicin til peritonealdialysevæske            |
| ZZ0151A  | Kontrol i forbindelse med hjemmedialysebehandling           |
| ZZ0151A1 | Kontrol i forbindelse med hjemmehæmodialysebehandling       |
| ZZ0151A2 | Kontrol i forbindelse med hjemmeperitonealdialysebehandling |
| ZZ4341   | Hæmodialyse, kronisk                                        |
| ZZ4342   | Hæmodialyse, kronisk i dialysecenter                        |
| ZZ4343   | Hæmodialyse, kronisk i hjemmet                              |
| ZZ4346   | Peritonealdialyse, kronisk                                  |
| ZZ4347   | Peritonealdialyse, kronisk i dialysecenter                  |
| ZZ4348   | Peritonealdialyse, kronisk i hjemmet                        |
| ZZ4350   | Haemofiltratio                                              |

### *Stem cell transplantation*

|        |                                                                       |
|--------|-----------------------------------------------------------------------|
| BOQE   | Behandling med stamcellekoncentrat                                    |
| BOQE0  | Behandling med stamcellekoncentrat fra knoglemarv                     |
| BOQE00 | Behandling med stamcellekoncentrat fra autolog knoglemarv             |
| BOQE01 | Beh.m. oprenset stamcellekoncentrat fra autolog knoglemarv            |
| BOQE02 | Beh.m.stamcellekonc.fra aut.knoglemarv,stimul.in vitro m.vækstfakt    |
| BOQE03 | Beh.m.oprens.stamcel.konc.fra aut.knoglemarv stim.in vitro m vækstfak |
| BOQE04 | Behandling med stamcellekoncentrat fra allogen knoglemarv             |
| BOQE05 | Beh.m. oprenset stamcellekonc fra allogen knoglemarv                  |
| BOQE06 | Beh.m.stamcellekonc.fra allogen knoglemarv stim.in vitro m.vækstfakt  |
| BOQE07 | Beh.m.oprens.stamcellekonc.fra allog.knoglemarv stim.in vitro væ.fakt |
| BOQE1  | Behandling med stamcellekoncentrat fra autolog knoglemarv             |
| BOQE10 | Beh.m.uoprenset,ikke-stim.stamcellekonc.fra autolog knoglem.          |
| BOQE11 | Beh.m. oprenset stamcellekoncentrat fra autolog knoglemarv            |
| BOQE12 | Beh.m.stamcellekonc.fra aut.knoglemarv,stim.in vitro/vækstf.          |
| BOQE13 | Beh.m.oprens.stamcel.konc/aut.knoglem. stim.in vitro/vækstf.          |
| BOQE14 | Behandling med stamcellekoncentrat fra allogent perifert blod         |
| BOQE15 | Beh.m.oprenset stamcellekonc.fra allogent perifert blod               |
| BOQE16 | Beh.m.stamcellekonc.fra allo.perif.blod stim.in vitro m vækstfakt     |
| BOQE17 | Beh.m.oprens.stamcelkonc.fra allo.perif.blod stim.in vitro vækstfak   |
| BOQE2  | Behandling m. stamcellekoncentrat fra autologt perifert blod          |
| BOQE20 | Beh.m.uoprenset,ikke-stim.stamcellekonc/autologt perif.blod           |

## Protocol

|        |                                                              |
|--------|--------------------------------------------------------------|
| BOQE21 | Beh. m. oprenset stamcellekonc. fra autologt perifert blod   |
| BOQE22 | Beh.m.stamcellekonc./aut.perif.blod stim.in vitro m.vækstfak |
| BOQE23 | Beh.m.oprens.stamcel.konc/aut.per.blod stim.in vitro/vækstf. |
| BOQE3  | Beh.m.stamcellekonc. fra allogen knoglemarv fra familiedonor |
| BOQE30 | Beh.m.uoprens.ikke-stim.stamcel.konc/allo.knoglem/fam.donor  |
| BOQE31 | Beh.m. oprens. stamcellekonc/allogen knoglemarv/familiedonor |
| BOQE32 | Beh.m.stamc.konc/allo.knoglem/fam.donor/stim.in vitro/vækstf |
| BOQE33 | Beh.m.oprens.stamc/allo.knoglem/fam.donor/stim.in vitro/v.fa |
| BOQE4  | Beh.m.stamcellekonc./allogent perifert blod fra familiedonor |
| BOQE40 | Beh.m.uoprens,ikke-stim.stamc.konc/allo.perf.blod/fam.donor  |
| BOQE41 | Beh.m. oprens. stamcellekonc/allogent perf. blod/fam.donor   |
| BOQE42 | Beh.m.stamc.konc/allo.perf.blod/fam.donor/stim.in vitro/v.fa |
| BOQE43 | Beh/oprens.stamc/allo.perf.blod/fam.donor/stim.in vitro/v.fa |
| BOQE5  | Beh. m. stamcellekonc. fra allogen knoglemarv/fremmed donor  |
| BOQE50 | Beh.m.uoprens.ikke-stim.stamcel.konc/allo.knoglem/frem.donor |
| BOQE51 | Beh.m. oprens.stamcellekonc/allogen knoglemarv/fremmed donor |
| BOQE52 | Beh.m.stamc.konc/allo.knoglem/fr.donor/stim.in vitro/vækstfa |
| BOQE53 | Beh.m.oprens.stamc/allo.knoglem/fr.donor/stim.in vitro/v.fak |
| BOQE6  | Beh.m.stamcellekonc.fra allogent perifert blod/fremmed donor |
| BOQE60 | Beh.m.uoprens, ikke-stim.stamc.konc/allo.perf.blod/fr.donor  |
| BOQE61 | Beh.m. oprens. stamcellekonc/allogent perf. blod/frem.donor  |
| BOQE62 | Beh.m.stamc.konc/allo.perf.blod/fr.donor/stim.in vitro/v.fak |
| BOQE63 | Beh/oprens.stamc/allo.perf.blod/fr.donor/stim.in vitro/v.fak |
| BOQE7  | Behandling med stamcellekoncentrat fra placenta og navlesnor |
| BOQE70 | Beh.m.uoprens. stamcellekoncentrat fra placenta og navlesnor |
| BOQE71 | Beh.m. oprens. stamcellekoncentrat fra placenta og navlesnor |
| BOQF   | Knoglemarvstransplantation (KMT)                             |
| BOQF0  | Autolog knoglemarvstransplantation                           |
| BOQF1  | Allogen knoglemarvstransplantation                           |
| BOQF11 | Allogen knoglemarvstransplantation, familiedoner             |
| BOQF12 | Allogen knoglemarvstransplantation, matched unrelated donor  |
| BOQF2  | Non myeloablativ knoglemarvstransplantation (mini-KMT)       |
| BOQF21 | Non myeloablativ KMT (mini-KMT), familiedonor                |
| BOQF22 | Non myeloablativ KMT (mini-KMT), matched unrelated donor     |

### *Other immunosuppressants*

|       |                                                                                         |
|-------|-----------------------------------------------------------------------------------------|
| BOHJ* | Antibody or immune-modulating therapy                                                   |
| BWG*  | Cytostatic treatment                                                                    |
| BWHB* | Biological therapies                                                                    |
|       | Or any ATC code for L01*, L04*, V02CA01, or V02CA02 used as additional code in the DNPR |
