# Supplementary material for: Partner Bereavement and Risk of Herpes Zoster: Results from Two Population-Based Case-Control Studies in Denmark and the United Kingdom
Source: PubMed Central journal article supplement (PMC5850543; doi:10.1093/cid/ciw840), 2016-12-15
Supplement: ciw840_suppl_supplementary_appendix_5.pdf [file ciw840_suppl_supplementary_appendix_5.pdf]

## **Psychological stress and risk of herpes zoster**

Sigrún Alba Jóhannesdóttir Schmidt  
Department of Clinical Epidemiology  
Aarhus University Hospital  
Olof Palmes Allé 43-45  
8200 Aarhus N  
Denmark  
E-mail: [saj@clin.au.dk](mailto:saj@clin.au.dk)

Sinéad Langan  
Department of Non-communicable Disease Epidemiology  
Faculty of Epidemiology & Population Health  
London School of Hygiene and Tropical Medicine  
Keppel Street  
London WC1E 7HT  
United Kingdom  
E-mail: [Sinead.Langan@lshtm.ac.uk](mailto:Sinead.Langan@lshtm.ac.uk)

Harriet Forbes  
Department of Non-communicable Disease Epidemiology  
Faculty of Epidemiology & Population Health  
London School of Hygiene and Tropical Medicine  
Keppel Street  
London WC1E 7HT  
United Kingdom  
E-mail: [Harriet.Forbes@lshtm.ac.uk](mailto:Harriet.Forbes@lshtm.ac.uk)

Sara Thomas  
Department of Infectious Disease Epidemiology  
Faculty of Epidemiology & Population Health  
London School of Hygiene and Tropical Medicine  
Keppel Street  
London WC1E 7HT  
United Kingdom  
E-mail: [sara.thomas@lshtm.ac.uk](mailto:sara.thomas@lshtm.ac.uk)

Liam Smeeth  
Department of Non-communicable Disease Epidemiology  
Faculty of Epidemiology & Population Health  
London School of Hygiene and Tropical Medicine  
Keppel Street  
London WC1E 7HT  
United Kingdom  
E-mail: [liam.smeeth@lshtm.ac.uk](mailto:liam.smeeth@lshtm.ac.uk)

Kathryn Mansfield  
Department of Non-communicable Disease Epidemiology

Faculty of Epidemiology & Population Health  
London School of Hygiene and Tropical Medicine  
Keppel Street  
London WC1E 7HT  
United Kingdom  
E-mail: [kathryn.mansfield@lshtm.ac.uk](mailto:kathryn.mansfield@lshtm.ac.uk)

Henrik Toft Sørensen  
Department of Clinical Epidemiology  
Aarhus University Hospital  
Olof Palmes Allé 43-45  
8200 Aarhus N  
Denmark  
E-mail: [hts@clin.au.dk](mailto:hts@clin.au.dk)

Mogens Vestergaard  
Research Unit and Section for General Practice  
Department of Public Health, Aarhus University  
Bartolins Allé 2  
8000 Aarhus C  
Denmark  
E-mail: [mv@ph.au.dk](mailto:mv@ph.au.dk)

Henrik Søndergaard Pedersen  
Research Unit and Section for General Practice  
Department of Public Health, Aarhus University  
Bartolins Allé 2  
8000 Aarhus C  
Denmark  
E-mail: [henrikp@ph.au.dk](mailto:henrikp@ph.au.dk)

Henrik Carl Schönheyder  
Department of Clinical Microbiology and Department of Clinical Medicine  
Aalborg University Hospital  
Mølleparksvej 10  
9000 Aalborg  
Denmark  
E-mail: [hcs@rn.dk](mailto:hcs@rn.dk)

### **A. Lay Summary (Max. 200 words)**

Herpes zoster, also known as shingles, is a frequent skin infection caused by reactivation of varicella zoster virus (VZV), which lies latent in the sensory ganglia after the primary infection chickenpox. Reactivation of the virus occurs when the immunity towards VZV wanes below a certain critical level. An increased risk of herpes zoster is thus observed among patient with immunosuppression, including those with inherited immunodeficiency and immunosuppression induced by drugs (*e.g.* chemotherapy), radiotherapy, or other disease (*e.g.* human immunodeficiency virus [HIV] or cancer).

Psychological stress may result in suppression of the immune system and thus possibly an increased risk of herpes zoster. However, data from large epidemiological studies on psychological stressors as risk factors for herpes zoster are sparse and conflicting.

Using data from the UK Clinical Practice Research Datalink (CPRD) and Hospital Episode Statistics (HES), we will investigate whether individuals diagnosed with herpes zoster have more frequent history of psychological stress than individuals without zoster, including partner bereavement, depressive disorder, anxiety disorder, and stress or adjustment disorder. We will explore the impact of recentness and severity of stress. Data will be published together with results from parallel analyses conducted on Danish data. The study is a health research study.

### **B. Technical Summary (Max. 200 words)**

We will use CPRD and HES data to conduct a case-control study of the association between psychological stress and the risk of herpes zoster.

We will identify all adults with a first-time diagnosis of herpes zoster between 2000 to 2014. We will use incidence density sampling to select four controls per case matched by age, sex and practice. The date of herpes zoster diagnosis will be considered the index date for cases and their matched controls.

We will identify history of partner bereavement, depressive disorder, anxiety disorder, and stress or adjustment disorder prior to index date. We will categorise bereavement according to whether the partner death was foreseen, as measured by the age-adjusted Charlson Comorbidity Index and codes indicating terminal disease. For the psychiatric diagnoses, we will categorise severity as severe (requiring inpatient admission), moderate (requiring referral to other mental health service) or mild (remaining patients) based on healthcare records within 90 days before index date.

Using conditional logistic regression, we will compute odds ratios with 99% confidence intervals for the association between each psychological stressor and herpes zoster adjusting for risk factors for herpes zoster. We will examine the robustness of our results through several sensitivity analyses.

### **C. Objectives, Specific Aims and Rationale**

The objective of this study is to use data from CPRD and HES to examine the association between various psychological stressors and the risk of herpes zoster. Specifically, we will examine the risk

of herpes zoster following partner bereavement, depressive disorder, anxiety disorder, or stress or adjustment disorder, focusing on the recentness and severity of these stressors. The results from our study will contribute to the understanding of the epidemiology of herpes zoster and may confirm the presumed suppressive effect of psychological stress on varicella-zoster cell-mediated immunity.

#### **D. Background**

Herpes zoster, also known as shingles, is a frequent neurocutaneous infection caused by reactivation of VZV, which lies latent in the sensory ganglia after the primary infection chickenpox.<sup>1</sup> Reactivation occurs when the cell-mediated immunity towards VZV wanes below a certain critical level.<sup>1</sup> Accordingly, the risk of herpes zoster is increased among elderly because of immunosenescence, among patients with inherited cell-mediated immunodeficiency, and among patients with immunosuppression acquired by drugs (*e.g.* patients receiving corticosteroids or chemotherapy), radiotherapy, or the disease (*e.g.* HIV or haematological cancer).<sup>1,2</sup>

Psychological stress is associated with activation of the hypothalamic-pituitary-adrenal axis and thereby suppression of the immune system.<sup>3,4</sup> It is therefore possible that psychological stress increases the risk of herpes zoster. For example, it has been demonstrated that VZV-specific cell-mediated immunity is reduced in patients with major depression<sup>5</sup> and that it correlates negatively with the severity of depressive symptoms.<sup>6</sup> Furthermore, the immunological response to the zoster vaccine is reduced in patients with untreated depression compared with individuals treated with antidepressants and individuals without depression.<sup>7</sup> However, data from large epidemiological studies on the association between psychological stressors and risk of herpes zoster are sparse and conflicting.

Previous epidemiological studies on psychiatric disease and risk of herpes zoster have considered primarily depression without examining the association by timing and severity.<sup>2,8-15</sup> Studies on negative life events, such as partner bereavement, are also sparse<sup>15-19</sup> and interpretation is hampered by study limitations, such as potential selection bias (non-response and volunteer bias),<sup>15,17-19</sup> lack of interviewer blinding,<sup>15,17</sup> and small study size.<sup>15,17-19</sup> Furthermore, various exposure windows and definitions have been employed<sup>15-19</sup> and only one study performed detailed analyses according to time passed between the life event and diagnosis of herpes zoster.<sup>16</sup>

#### **E. Study Type**

The study is hypothesis testing. The null hypothesis is that psychological stress is not associated with an increased risk of being diagnosed with herpes zoster.

#### **F. Study Design**

We propose to conduct a matched case-control study using data from CPRD linked to HES. This design is efficient for examining the wide range of psychological stressors considered in this study.

#### **G. Sample Size**

Table 1 provides power calculations for selected psychological stressors, assuming a case: control ratio of 4, an alpha-level of 0.05, and inclusion of 144,000 incident cases of herpes zoster.<sup>2</sup> Stata 14 was used for all calculations.

**Table 1.** Power calculation for the proposed study

| Exposure                                         | Prevalence         | Power to detect an OR of 1.1 | Power to detect an OR of 1.2 | Power to detect an OR of 1.3 |
|--------------------------------------------------|--------------------|------------------------------|------------------------------|------------------------------|
| Any depression diagnosis                         | 4% <sup>2</sup>    | 100%                         | 100%                         | 100%                         |
| Referral to psychiatrist, any                    | 5.1% <sup>20</sup> | 100%                         | 100%                         | 100%                         |
| Referral to psychologist/psychiatrist, past year | 1.1% <sup>20</sup> | 93%                          | 100%                         | 100%                         |
| Spousal bereavement past 30 days                 | 0.4% <sup>21</sup> | 56%                          | 98%                          | 100%                         |

### H. Data Linkage Required (if applicable)

The CPRD data will be linked to inpatient HES data to obtain data on diagnoses of herpes zoster, exposures and covariates in the hospital-based setting. Identification of diagnoses in the hospital-based setting is important for completeness of variables and thus the study validity. Furthermore, we will obtain data on socioeconomic status (for the area of residence through linkage to the Index of Multiple Deprivation, version 2010). The HES data will be included in the main analysis to increase completeness of diagnoses and the accuracy of timing, although only 60% of patients from the CPRD have data available in the HES database. Socioeconomic status as measured by the Index of Multiple Deprivation will be included in the multivariable models in a sensitivity analysis restricting to patients without missing data on this variable (approximately 60%).

### I. Study Population

We will use CPRD and HES to identify all patients with a record of herpes zoster between 1 January 2000 and 31 December 2014 (or 31 March 2014 if a more up to date version of HES does not become available during the study) and at least 12 months of follow-up before diagnosis. We will restrict to patients aged 18 years or older because of differences in the epidemiology of herpes zoster in children and adults. For inclusion of cases with hospital diagnosis of herpes zoster, we will only consider those with a first-listed (primary) diagnosis of herpes zoster. The date of diagnosis in the CPRD or admission in HES will be considered the index date. In case of diagnosis in both CPRD and HES, we will consider the earliest diagnosis. We will only consider patients with no previous codes for herpes zoster or postherpetic neuralgia in the CPRD or HES (Read codes or ICD-10 codes in any position). Thus, if the earliest mention of herpes zoster in the data is a secondary code in HES, we will exclude the patient from the study. We expect to identify approximately 144,000 incident cases of herpes zoster.<sup>2</sup> We will define herpes zoster according to a code list used in a previously published study on risk factors for herpes zoster conducted by our research group (Supplementary Appendix).<sup>2</sup> The list will be updated slightly to include new codes.

### J. Selection of comparison group(s) or controls

We will use incidence density sampling to randomly select up to four controls per case matched by practice, sex and age (within 1 year). Controls have to be registered in the practice at the index date

of the case and for at least 12 months before and should have no history of herpes zoster or post-herpetic neuralgia. Matching by practice controls for practice-level socioeconomic status. Controls will be assigned an index date identical to that of their case. We will exclude inactive controls, defined as individuals with no contact with their practice (*i.e.* no consultation records of any kind, including repeat prescriptions, face to face consultations, and telephone consultations) from six months before to 12 months after the index date.

## **K. Exposures, Outcomes and Covariates**

Definitions of exposures and covariates are described in the following. The definition of the outcome, herpes zoster, is described in section I. Preliminary code lists for exposures are provided in the Supplementary Appendix. When necessary, we will differentiate between codes of psychiatric disease that indicate definite, possible (e.g. “depression interim review”) or non-specific/other diagnoses. Code lists for covariates will be based on modified versions of lists in Caliber<sup>22</sup> and the previous study on herpes zoster risk factors.<sup>2</sup>

### **Partner bereavement**

We will define partner bereavement as the death of a cohabitee prior to the index date, as previously described by Shah *et al.*<sup>23</sup> Cohabitees will be identified through CPRD using the family practice number, which identifies people who are living in the same household or otherwise are associated (*e.g.* live in the same institution). To avoid including the death of children in families, we will restrict to couples of the opposite sex, with an age gap of 10 years or less and with no younger adult in the household within 15 years of either of the couple.<sup>23</sup> Also, we will exclude couples where 1) a patient has codes in the primary care record that indicate residence in a communal establishment before the index date and/or 2) both individuals in the couple are 95 years of age or older. Through comparison with contemporary national representative household surveys in England, it has been shown that among persons aged  $\geq 60$  years, couples of the opposite sex with an age difference of less than 10 years who live together, 99.4% identify themselves as married or cohabitating.<sup>23</sup> Because the validity of our algorithm is expected to be lower for younger persons, we will restrict the study population to persons aged 40 years or older. Also, we will stratify the results by age.

We will use the CPRD death date in the deceased partner’s primary care record as the date of bereavement. In analyses, we will consider any prior bereavement as well as differentiate between whether partner bereavement occurred within 0–7 days, 8–14 days, 15–30 days, 31–90 days, 91–365 days, 366–1095 days or >1095 days before the index date. The reference group for the analyses will be persons who have not previously experienced partner death.

We will aim to explore whether the association between bereavement and herpes zoster depends on whether the death of partner was unforeseen. We will ascertain the primary care (CPRD) and hospital record (HES) for deceased partners at one month before their date of death and compute their age-adjusted Charlson Comorbidity Index (ACCI), which is widely used to predict mortality.<sup>24</sup> The original Charlson Comorbidity Index assigns 0 to 6 points to a range of chronic diseases according to their ability to predict death.<sup>24</sup> In the age-adjusted index, additional points are given according to age (1 point: 50–59 years; 2 point: 60–69 years; 3 points: 70–79 years; 4 points: 80–89 years; 5 points: 90–99 years).<sup>24</sup> Based on the total ACCI score, we will the group study participants

into three categories of risk of partner death: lowest risk (0–5 points), intermediate risk (6–8 points), or highest risk (9–16 points). The CCI has previously been used to estimate risk of death in studies of bereavement.<sup>21,25</sup> As the ACCI includes a wide range of diseases, which may not all help partners to predict the expectedness of death, we will perform analyses according to whether partners had a previous healthcare record of terminal disease (as indicated by *e.g.* stay at hospice or metastatic cancer).

### **Diagnoses or symptoms of psychiatric disease or stress**

Using CPRD and HES data, we will identify any history of depressive disorder, anxiety disorder (phobic anxiety disorders and other anxiety disorders) or acute stress and adjustment disorder in the electronic medical record prior to the index date. Since 2004, there has been an increasing use of symptoms rather than diagnosis codes for depression in CPRD.<sup>26</sup> Thus, to increase the completeness of our codes lists, we will include both Read codes for diagnoses and symptoms of depression and anxiety disorders.

The reference group for all analyses will be persons with no record of any of the psychiatric diseases or symptoms prior to index date. We will examine the association by timing and severity of these diseases. Based on the most recent record of psychological stress prior to index date, we will define timing as current ( $\leq 90$  days before index date), recent ( $>90$  days to 365 days before index date), former ( $>365$  days before index date), and no (no previous record) psychological distress. Furthermore, we will subdivide the current group into newly diagnosed (first-ever record 90 days or less before the index date) and chronic (others). We will categorise severity as severe (requiring inpatient admission for  $>1$  day), moderate (requiring referral from general practice to other mental health service) or mild (remaining patients) based on healthcare records within 90 days before index date. For the definition of severe disease, we will only consider those admitted with one of the psychiatric diseases (depressive disorder, anxiety disorder, or acute stress and adjustment disorder) as primary diagnosis for more than one day.

### **Covariates**

From CPRD and HES, we will retrieve data on potential risk factors prior to index date index date (as defined in the study by Forbes *et al.*)<sup>2</sup>: Rheumatoid arthritis; systemic lupus erythematosus; inflammatory bowel disease; chronic obstructive pulmonary disease; asthma; chronic kidney disease (including those with kidney transplant or kidney dialysis); diabetes (type I, type II, or missing); human immunodeficiency virus infection, haematopoietic stem cell transplantation, myeloma, or “other unspecified cellular immune deficiencies” (for example, pancytopenia); recent history (less than two years before index date) of leukaemia, lymphoma, or bone marrow transplant; use of oral corticosteroids, other immunosuppressive treatments or use of inhaled corticosteroids within prior three months; smoking status (current smoker, ex-smoker, non-smoker); alcohol consumption (current drinker, ex-drinker, non-drinker); and body mass index (underweight ( $<18.5$  kg/m<sup>2</sup>), normal weight (18.5–24.9 kg/m<sup>2</sup>), overweight (25–29.9 kg/m<sup>2</sup>), obese ( $\geq 30$  kg/m<sup>2</sup>)). Read codes for BMI category will not be used, because they are rarely recorded. The categorisation of lifestyle variables will be pragmatically based on status recorded closest to the index date, with records within -1 year to +1 month from index date regarded as the best, +1 months to +1 years

from index date being second best, the nearest before -1 year from index date as the third best, and within +1 year from index date being least best.<sup>2</sup>

## **L. Data/ Statistical analysis**

We will keep the analysis of bereavement and the psychiatric diseases separate, as we intend to publish them separately (see section Q).

We will characterise the population by case-control status and exposures. We will use conditional logistic regression to compute unadjusted odds ratios, associating the various measures of psychological stress with herpes zoster. We will consider the psychiatric diseases both together and separately. Definitions and reference groups described in section K will be applied. We will use 99% confidence intervals to account for the multiple measures included and to reduce the chance of detecting clinically insignificant associations. Please see amendment regarding choice of precision by the end of the protocol.

Given the density case-control study design, the odds ratios provide an unbiased estimate of the incidence rate ratios.<sup>27</sup> To account for potential confounding, we will fit two multivariable conditional logistic regression models. The first model will include all the aforementioned pre-specified covariates except for lifestyle factors and the second model will additionally account for lifestyle factors. The second model will include only those with complete data for all variables (estimated 90% of cases and controls).<sup>2</sup> We will control for age, sex and practice-level socioeconomic status by conditioning on matching factors.

We will examine for presence of effect measure modification by stratifying the results for current psychological stress by categories of age (<50, 50–59, 60–69, and ≥70 years) and sex. For bereavement, we will use both a 30-day and 90-day exposure window in the stratified analyses. To examine whether any association between bereavement and herpes zoster is mediated through depression or anxiety, we will also stratify the results by recent diagnoses of these conditions.

To quantify the effects of the psychological stress factors in absolute terms, we will compute the age-specific rate of zoster for each factor by multiplying the age-specific effect estimates by the age-specific rate of zoster in the general population in 2010 (estimated from CPRD).

We will perform a number of sensitivity analyses to address potential limitations of our data:

1. We will repeat analyses for the association between bereavement and herpes zoster after restricting to persons with evidence of having a partner, to examine whether using only persons who have a partner in the reference group affects the results.
2. We will test the completeness of our bereavement algorithm by examining how many of the bereaved subjects are identified by using CPRD codes for partner bereavement. Bereavement codes will however not be used in the main analysis, because they may be coded differentially (depending on consulting behaviour) and because timing of partner death is assumed to be less accurate than that derived from our algorithm.
3. We will examine the impact of using various cut-offs between current and recent (7, 14, 15, 30, and 180 days) psychiatric stress instead of 90 days.
4. We will perform analyses separating definite (with and without symptoms included), possible and unspecific/other diagnoses of psychiatric disease.



5. Under the assumption that patients who receive pharmacological therapy are more likely to have severe depression, we will change the severity definition to include the following categories: very severe (requiring inpatient admission for >1 day), severe (written prescription for an antidepressant recorded within 2 weeks to 90 days prior to index date), moderate (requiring referral from general practice to other mental health service) or mild (remaining patients) based on healthcare records within 2 weeks to 90 days before index date. The 2-weekiSimilarly, we will perform analyses after excluding those with previous antidepressant prescription from the reference group for psychiatric diseases.
6. We will repeat analyses examining each association for persons with a record of that psychological stressor only (e.g. ‘depression only’), as some persons may have overlapping conditions.
7. We will perform the analysis after multiple imputation of missing information on lifestyle factors using chained equations,<sup>28</sup> as described by Forbes *et al.*<sup>2</sup>
8. We will additionally adjust for Index of Multiple Deprivation score (categorised in quintiles) among the approximately 60% who have agreed their electronic medical records linked to other dataset.

All analyses will be performed using STATA statistical software package.

#### **M. Plan for addressing confounding**

We will use multivariable conditional regression to adjust for risk factors listed in section K and (through conditioning) for matching factors (age, sex and practice). These covariables were selected based on the literature.

#### **N. Plan for addressing missing data**

Please see section L.

#### **O. Limitations of the study design, data sources and analytical methods**

There are some potential limitations to the proposed study, which we discuss in the following.

Partner bereavement and psychiatric diseases may affect disease perception and health-seeking behaviour, and thus the chance of having herpes zoster diagnosed. For example, depressive patients may have a stronger perception of mild skin symptoms.<sup>29</sup> On the other hand, patients experiencing psychological stress may not have energy to seek treatment for minor health problems. It is therefore difficult to predict in which direction such bias would affect our results. We will partly account for health-seeking behaviour by including data on participants’ socioeconomic status. Also, due to the painful symptoms, we believe that individuals with herpes zoster would present to their general practitioner.<sup>30,31</sup>

Some misclassification of partner bereavement is possible, as our definition of partners requires that couples are registered with the same general practice and have an age difference of 10 years or less. Also, the nature of the relationship may be misclassified, as some ‘partners’ may be otherwise

associated (*e.g.* friends). Finally, we could miss some partners if the family practice identifier is used inconsistently in some practices or if the partner of a case or control uses a different general practitioner, who does not report in the CPRD. However, we do not believe that this misclassification is differential. Thus, if we find an association between bereavement and herpes zoster, it cannot be explained by such misclassification. Also, the sensitivity analysis restricting to partners only would limit such bias.

Expectation of death is difficult to categorise using data from electronic medical records and the psychological distress associated with expected death from a spouse may vary depending on the type of chronic disease. As we rely completely on the age-adjusted Charlson Comorbidity Index and utilisation of health services, the effect of probability of death may represent a mixed group of patients. This mix could possibly attenuate any true difference between groups of expected and unexpected partner death. We will explore the effect of expected death in various sensitivity analyses, which may point to limitations in our main definition.

We may underestimate use of prescription medications, because the electronic records do not include prescriptions written by hospital physicians. However, prescription treatment initiated by specialists is typically repeated by the general practitioner, so this likely affects mainly first-time prescriptions. Also, written prescriptions do not necessarily correspond to use. Nonetheless, we believe this is a minor issue, as we are interested in using prescriptions as a proxy measure of underlying psychological stress rather than the effect of the drug in itself.

Although we will adjust for various comorbidities and lifestyle factors, we may have residual confounding as partners typically share health characteristics and psychological stress may be associated with unhealthy lifestyle.

Misclassification of herpes zoster is possible, as it is usually a clinical diagnosis. However, because other validation studies report a high positive predictive value of physician-diagnosed herpes zoster,<sup>32-36</sup> we believe that the impact of misclassification on our results will be small.

Finally, we will not include outpatient HES data and inpatient HES data and the Index of Multiple Deprivation scores are only available for approximately 60% of the study population. Because herpes zoster is treated primarily in general practice, this lack of data will have only minor effect on the study population sample. However, it may result in misclassification of exposure and residual confounding. The sensitivity analysis restricting to the study subjects with HES inpatient data and the Index of Multiple Deprivation scores may aid in uncovering such bias.

#### **P. Patient or user group involvement (if applicable)**

Patients have not been involved in the planning of the study to date. We aim to disseminate any important findings to the public and appropriate patient groups as part of the publication process.

#### **Q. Plans for disseminating and communicating study results, including the presence or absence of any restrictions on the extent and timing of publication**

We intend to publish our findings in a peer-reviewed journal and to present them at relevant scientific conferences. Parallel analyses will be conducted on nationwide Danish registry data. All

approvals have been obtained for conducting the Danish study. We aim to publish the results from UK and Denmark together in two papers on partner bereavement and psychiatric disease (remaining exposures) respectively. This distinction will be made because partner bereavement is considered a natural response to a life event, whereas the psychiatric diseases (e.g. depression) are considered pathological reactions. Necessary approvals for use of the Danish data have already been obtained.

### **Amendments**

- Originally, we stated that we used 99% confidence intervals "to account for the multiple measures included and to reduce the chance of detecting clinically insignificant associations" (L. Data/ Statistical analysis). However, we want to specify that in reality we consider the choice of precision arbitrary. We will base our interpretations on clinical significance of the point estimates rather than dichotomising to statistical significance according to an arbitrary significance level.<sup>37</sup>
- Final code lists used are attached as an appendix.

## R. References

- 1 Wilson JF. Herpes zoster. *Ann Intern Med* 2011; **154**: ITC31–15.
- 2 Forbes HJ, Bhaskaran K, Thomas SL, Smeeth L, Clayton T, Langan SM. Quantification of risk factors for herpes zoster: population based case-control study. *BMJ* 2014; **348**: g2911.
- 3 Reiche EMV, Nunes SOV, Morimoto HK. Stress, depression, the immune system, and cancer. *Lancet Oncol* 2004; **5**: 617–25.
- 4 Glaser R, Kiecolt-Glaser JK. Stress-induced immune dysfunction: implications for health. *Nat Rev Immunol* 2005; **5**: 243–51.
- 5 Irwin M, Costlow C, Williams H, *et al.* Cellular immunity to varicella-zoster virus in patients with major depression. *J Infect Dis* 1998; **178 Suppl 1**: S104–8.
- 6 Irwin MR, Levin MJ, Carrillo C, *et al.* Major depressive disorder and immunity to varicella-zoster virus in the elderly. *Brain Behav Immun* 2011; **25**: 759–66.
- 7 Irwin MR, Levin MJ, Laudenslager ML, *et al.* Varicella zoster virus-specific immune responses to a herpes zoster vaccine in elderly recipients with major depression and the impact of antidepressant medications. *Clin Infect Dis* 2013; **56**: 1085–93.
- 8 Hata A, Kuniyoshi M, Ohkusa Y. Risk of Herpes zoster in patients with underlying diseases: a retrospective hospital-based cohort study. *Infection* 2011; **39**: 537–44.
- 9 Joesoef RM, Harpaz R, Leung J, Bialek SR. Chronic medical conditions as risk factors for herpes zoster. *Mayo Clin Proc* 2012; **87**: 961–7.
- 10 Ogunjimi B, Buntinx F, Bartholomeeusen S, *et al.* Herpes zoster is associated with herpes simplex and other infections in under 60 year-olds. *J Infect* 2015; **70**: 171–7.
- 11 Hoover DR, Cohen M, Mutimura E, Cohen HW, Anastos K. Prevalence of shingles and association with PTSD and depression among HIV infected women in Rwanda. *Translational Science 2012 Meeting abstracts* 2012; : 1–70.
- 12 Temmerman G, Van Nimmen L. Investigation of zona (Herpes zoster) in 1966 by the research group of the general practitioners of Northern Belgium. Results and conclusions. *Tijdschrift voor Geneeskunde*. 1974; **30**: 411–26.
- 13 Tseng HF, Smith N, Marcy SM, Sy LS, Chao CR, Jacobsen SJ. Risk factors of herpes zoster among children immunized with varicella vaccine: results from a nested case-control study. *Pediatr Infect Dis J* 2010; **29**: 205–8.
- 14 Yang Y-W, Chen YH, Lin H-W. Risk of herpes zoster among patients with psychiatric diseases: a population-based study. *J Eur Acad Dermatol Venereol* 2011; **25**: 447–53.
- 15 Lasserre A, Blaizeau F, Gorwood P, *et al.* Herpes zoster: family history and psychological stress-case-control study. *J Clin Virol* 2012; **55**: 153–7.

- 16 Harpaz R, Leung JW, Brown CJ, Zhou FJ. Psychological stress as a trigger for herpes zoster: might the conventional wisdom be wrong? *Clin Infect Dis* 2015; **60**: 781–5.
- 17 Schmader K, Studenski S, MacMillan J, Grufferman S, Cohen HJ. Are stressful life events risk factors for herpes zoster? *J Am Geriatr Soc* 1990; **38**: 1188–94.
- 18 Schmader K, George LK, Burchett BM, Hamilton JD, Pieper CF. Race and stress in the incidence of herpes zoster in older adults. *J Am Geriatr Soc* 1998; **46**: 973–7.
- 19 Schmader K, George LK, Burchett BM, Pieper CF. Racial and psychosocial risk factors for herpes zoster in the elderly. *J Infect Dis* 1998; **178 Suppl 1**: S67–70.
- 20 Spoenclin J, Bichsel F, Voegel JJ, Jick SS, Meier CR. The association between psychiatric diseases, psychotropic drugs and the risk of incident rosacea. *Br J Dermatol* 2014; **170**: 878–83.
- 21 Graff S, Christensen B, Fenger-Grøn M, *et al*. Long-term risk of atrial fibrillation after the death of a spouse: A nationwide population-based case-control study.
- 22 Denaxas SC, George J, Herrett E, *et al*. Data resource profile: cardiovascular disease research using linked bespoke studies and electronic health records (CALIBER). *Int J Epidemiol* 2012; **41**: 1625–38.
- 23 Shah SM, Carey IM, Harris T, DeWilde S, Victor CR, Cook DG. Do good health and material circumstances protect older people from the increased risk of death after bereavement? *Am J Epidemiol* 2012; **176**: 689–98.
- 24 Charlson M, Szatrowski TP, Peterson J, Gold J. Validation of a combined comorbidity index. *J Clin Epidemiol* 1994; **47**: 1245–51.
- 25 Shah SM, Carey IM, Harris T, DeWilde S, Victor CR, Cook DG. The effect of unexpected bereavement on mortality in older couples. *Am J Public Health* 2013; **103**: 1140–5.
- 26 Rait G, Walters K, Griffin M, Buszewicz M, Petersen I, Nazareth I. Recent trends in the incidence of recorded depression in primary care. *Br J Psychiatry* 2009; **195**: 520–4.
- 27 Pearce N. What does the odds ratio estimate in a case-control study? *Int J Epidemiol* 1993; **22**: 1189–92.
- 28 White IR, Royston P, Wood AM. Multiple imputation using chained equations: Issues and guidance for practice. *Stat Med* 2011.
- 29 Abram K, Silm H, Maaros H-I, Oona M. Subjective disease perception and symptoms of depression in relation to healthcare-seeking behaviour in patients with rosacea. *Acta Derm Venerol* 2008; **89**: 488–91.
- 30 Lu P-J, Euler GL, Jumaan AO, Harpaz R. Herpes zoster vaccination among adults aged 60 years or older in the United States, 2007: uptake of the first new vaccine to target seniors. *Vaccine* 2009; **27**: 882–7.

- 31 Østergaard K, Damgaard M, Kristiansen TB, Madsen KG. Herpes zoster incidence in persons above 50 years of age (article in Danish). *Ugeskr Laeg* 2009; **171**: 2194–7.
- 32 Oxman MN, Levin M, Johnson GR, *et al.* A vaccine to prevent herpes zoster and postherpetic neuralgia in older adults. *N Engl J Med* 2005; **352**: 2271–84.
- 33 Rübber A, Baron JM, Grussendorf-Conen EI. Routine detection of herpes simplex virus and varicella zoster virus by polymerase chain reaction reveals that initial herpes zoster is frequently misdiagnosed as herpes simplex. *Br J Dermatol* 1997; **137**: 259–61.
- 34 Scott FT, Johnson RW, Leedham-Green M, Davies E, Edmunds WJ, Breuer J. The burden of Herpes Zoster: a prospective population based study. *Vaccine* 2006; **24**: 1308–14.
- 35 Weinmann S, Chun C, Schmid DS, *et al.* Incidence and clinical characteristics of herpes zoster among children in the varicella vaccine era, 2005-2009. *J Infect Dis* 2013; **208**: 1859–68.
- 36 Rimland D, Moanna A. Increasing incidence of herpes zoster among Veterans. *Clin Infect Dis* 2010; **50**: 1000–5.
- 37 Rothman KJ. Six persistent research misconceptions. *J Gen Intern Med* 2014; **29**: 1060–4.

## Supplementary appendix

Table 1. *Preliminary* list of CPRD codes

| Medcode                             | Readterm                                                     | Group (if applicable)* |
|-------------------------------------|--------------------------------------------------------------|------------------------|
| <i>Herpes zoster</i>                |                                                              |                        |
| 390                                 | Herpes zoster                                                |                        |
| 516                                 | Shingles                                                     |                        |
| 7331                                | Ramsey Hunt Syndrome                                         |                        |
| 8936                                | Ophthalmic herpes zoster infection                           |                        |
| 14718                               | Herpes zoster with ophthalmic complication                   |                        |
| 14793                               | Herpes zoster otitis externa                                 |                        |
| 18918                               | Herpes zoster ophthalmicus                                   |                        |
| 21069                               | Herpes zoster with unspecified complication                  |                        |
| 21471                               | Herpes zoster NOS                                            |                        |
| 25320                               | Herpes zoster with dermatitis of eyelid                      |                        |
| 27403                               | Geniculate herpes zoster                                     |                        |
| 27546                               | Herpes zoster with keratoconjunctivitis                      |                        |
| 31681                               | Herpes zoster - otitis externa                               |                        |
| 33810                               | Herpes zoster with other ophthalmic complication             |                        |
| 38531                               | Herpes zoster with other specified complication NOS          |                        |
| 39692                               | Polyneuropathy in herpes zoster                              |                        |
| 43235                               | Herpes zoster with other specified complication              |                        |
| 44944                               | Herpes zoster with meningitis                                |                        |
| 47375                               | Zoster encephalitis                                          |                        |
| 50537                               | Herpes zoster with other CNS complications                   |                        |
| 51692                               | Encephalitis due to herpes zoster                            |                        |
| 52126                               | Herpes zoster with other central nervous system complication |                        |
| 52319                               | Disseminated zoster                                          |                        |
| 55940                               | Herpes zoster iridocyclitis                                  |                        |
| 57895                               | Herpes zoster meningitis                                     |                        |
| 62558                               | Infective otitis externa due to herpes zoster                |                        |
| 63739                               | Herpes zoster with other CNS complication NOS                |                        |
| 69405                               | Herpes zoster encephalitis                                   |                        |
| 70197                               | [X]Zoster without complications                              |                        |
| 71464                               | Meningitis due to herpes zoster virus                        |                        |
| <i>Chronic zoster complications</i> |                                                              |                        |
| 1598                                | Post-herpetic neuralgia                                      |                        |
| 7584                                | Post-herpetic trigeminal neuralgia                           |                        |
| 10223                               | Postherpetic neuralgia                                       |                        |
| 11498                               | Postherpetic trigeminal neuralgia                            |                        |

|                                                                       |                                    |              |
|-----------------------------------------------------------------------|------------------------------------|--------------|
| 17180                                                                 | Postzoster neuralgia               |              |
| 31709                                                                 | Postherpetic polyneuropathy        |              |
| <i>Residence in a communal establishment (for partner definition)</i> |                                    |              |
| 21280                                                                 | Resident in part III accomodation  |              |
| 36096                                                                 | Part 3 accomodation                |              |
| 27425                                                                 | Part III accommodation             |              |
| 13360                                                                 | Nursing/other home                 |              |
| 13359                                                                 | Lives in a nursing home            |              |
| 11419                                                                 | Lives in an old peoples home       |              |
| 15840                                                                 | Lives in a welfare home            |              |
| 27968                                                                 | Residential institution            |              |
| 24956                                                                 | Lives in a residential home        |              |
| 59548                                                                 | Lives in an old peoples home       |              |
| 68005                                                                 | Lives in a welfare home            |              |
| 49681                                                                 | Lives in care home                 |              |
| <i>Partner bereavement (for sensitivity analysis)</i>                 |                                    |              |
| 207                                                                   | Death of spouse                    |              |
| 11251                                                                 | Death of wife                      |              |
| 12076                                                                 | Husband died                       |              |
| 12325                                                                 | Death of husband                   |              |
| 17802                                                                 | Husband died                       |              |
| 25097                                                                 | Death of husband                   |              |
| 28440                                                                 | Death of partner                   |              |
| 36947                                                                 | Partner dying                      |              |
| <i>Depression</i>                                                     |                                    |              |
| 324                                                                   | Depressive disorder NEC            | Definite (1) |
| 543                                                                   | [X]Depression NOS                  | Definite (1) |
| 595                                                                   | Endogenous depression              | Definite (1) |
| 1055                                                                  | Agitated depression                | Definite (1) |
| 1908                                                                  | O/E - depressed                    | Definite (1) |
| 1996                                                                  | Depressed                          | Definite (1) |
| 2147                                                                  | Poor self esteem                   | Definite (1) |
| 2560                                                                  | Depressive psychoses               | Definite (1) |
| 2930                                                                  | C/O - feeling unhappy              | Definite (1) |
| 2970                                                                  | [X]Depressive episode, unspecified | Definite (1) |
| 3291                                                                  | [X]Depressive disorder NOS         | Definite (1) |
| 3292                                                                  | [X]Recurrent depressive disorder   | Definite (1) |
| 4323                                                                  | Chronic depression                 | Definite (1) |
| 4639                                                                  | [X]Depressive episode              | Definite (1) |
| 4824                                                                  | C/O - feeling depressed            | Definite (1) |



|       |                                                              |              |
|-------|--------------------------------------------------------------|--------------|
| 5879  | Agitated depression                                          | Definite (1) |
| 6482  | Recurrent depression                                         | Definite (1) |
| 6546  | Endogenous depression first episode                          | Definite (1) |
| 6854  | [X]Other depressive episodes                                 | Definite (1) |
| 6932  | Endogenous depression - recurrent                            | Definite (1) |
| 6950  | Endogenous depression first episode                          | Definite (1) |
| 7011  | Single major depressive episode NOS                          | Definite (1) |
| 7412  | Loss of confidence                                           | Definite (1) |
| 8826  | [X]SAD - Seasonal affective disorder                         | Definite (1) |
| 8928  | Low mood                                                     | Definite (1) |
| 9183  | Masked depression                                            | Definite (1) |
| 9211  | [X]Moderate depressive episode                               | Definite (1) |
| 9667  | [X]Severe depressive episode without psychotic symptoms      | Definite (1) |
| 9796  | Symptoms of depression                                       | Definite (1) |
| 10015 | Depressed mood                                               | Definite (1) |
| 10438 | Depressive symptoms                                          | Definite (1) |
| 10610 | Single major depressive episode                              | Definite (1) |
| 10667 | [X]Mild depression                                           | Definite (1) |
| 10720 | [X]Atypical depression                                       | Definite (1) |
| 10825 | Seasonal affective disorder                                  | Definite (1) |
| 11252 | [X]Major depression, recurrent without psychotic symptoms    | Definite (1) |
| 11329 | [X]Endogenous depression without psychotic symptoms          | Definite (1) |
| 11717 | [X]Mild depressive episode                                   | Definite (1) |
| 12099 | [X]Severe depressive episode with psychotic symptoms         | Definite (1) |
| 14709 | Recurrent major depressive episodes, moderate                | Definite (1) |
| 15099 | Recurrent major depressive episode                           | Definite (1) |
| 15155 | Single major depressive episode, moderate                    | Definite (1) |
| 15219 | Single major depressive episode, severe, without psychosis   | Definite (1) |
| 16506 | Single major depressive episode, mild                        | Definite (1) |
| 16861 | [X]Recurrent severe episodes of psychotic depression         | Definite (1) |
| 18510 | [X]Single episode of psychogenic depression                  | Definite (1) |
| 19696 | [X]Recurrent episodes of psychogenic depression              | Definite (1) |
| 22806 | [X]Single episode major depression w/out psychotic symptoms  | Definite (1) |
| 23731 | [X]Endogenous depression with psychotic symptoms             | Definite (1) |
| 24112 | [X]Single episode of psychotic depression                    | Definite (1) |
| 24117 | [X]Single episode of major depression and psychotic symptoms | Definite (1) |
| 24171 | Recurrent major depressive episodes, severe, with psychosis  | Definite (1) |
| 25435 | Loss of capacity for enjoyment                               | Definite (1) |
| 25563 | Recurrent major depressive episode NOS                       | Definite (1) |
| 25697 | Recurrent major depressive episodes, severe, no psychosis    | Definite (1) |
| 26028 | Sad mood                                                     | Definite (1) |
| 27491 | Atypical depressive disorder                                 | Definite (1) |
| 28756 | [X]Seasonal depressive disorder                              | Definite (1) |

|        |                                                              |                         |
|--------|--------------------------------------------------------------|-------------------------|
| 29342  | Recurrent major depressive episodes, mild                    | Definite (1)            |
| 29520  | [X]Recurrent depressive disorder, current episode moderate   | Definite (1)            |
| 29784  | [X]Recurrent depressive disorder, current episode mild       | Definite (1)            |
| 30740  | Loss of interest                                             | Definite (1)            |
| 31757  | [X]Recurr severe episodes/psychogenic depressive psychosis   | Definite (1)            |
| 32159  | Single major depressive episode, severe, with psychosis      | Definite (1)            |
| 32941  | [X]Recurr severe episodes/major depression+psychotic symptom | Definite (1)            |
| 33469  | [X]Recurr depress disorder cur epi severe without psyc sympt | Definite (1)            |
| 34390  | Single major depressive episode, unspecified                 | Definite (1)            |
| 35671  | Recurrent major depressive episodes, unspecified             | Definite (1)            |
| 36616  | [X]Monopolar depression NOS                                  | Definite (1)            |
| 41989  | [X]Single episode agitated depressn w/out psychotic symptoms | Definite (1)            |
| 44300  | [X]Recurrent depressive disorder, unspecified                | Definite (1)            |
| 47009  | [X]Recurrent depress disorder cur epi severe with psyc symp  | Definite (1)            |
| 47731  | [X]Other recurrent depressive disorders                      | Definite (1)            |
| 52678  | [X]Single episode of psychogenic depressive psychosis        | Definite (1)            |
| 53148  | Loss of hope for the future                                  | Definite (1)            |
| 56609  | [X]Single episode of masked depression NOS                   | Definite (1)            |
| 59386  | [X]Single episode vital depression w/out psychotic symptoms  | Definite (1)            |
| 59869  | Loss of interest in previously enjoyable activity            | Definite (1)            |
| 73991  | [X]Vital depression, recurrent without psychotic symptoms    | Definite (1)            |
| 98252  | [X]Major depression, moderately severe                       | Definite (1)            |
| 98346  | [X]Major depression, mild                                    | Definite (1)            |
| 98414  | [X]Major depression, severe without psychotic symptoms       | Definite (1)            |
| 98417  | [X]Major depression, severe with psychotic symptoms          | Definite (1)            |
| 5987   | [X] Reactive depression NOS                                  | Definite (1)            |
| 7604   | [X]Single episode of reactive depression                     | Definite (1)            |
| 8478   | Reactive depressive psychosis                                | Definite (1)            |
| 8851   | [X]Recurrent episodes of depressive reaction                 | Definite (1)            |
| 8902   | [X]Recurrent episodes of reactive depression                 | Definite (1)            |
| 9055   | [X]Single episode of depressive reaction                     | Definite (1)            |
| 17770  | Psychotic reactive depression                                | Definite (1)            |
| 37764  | [X]Recurrent severe episodes/reactive depressive psychosis   | Definite (1)            |
| 101422 | Feeling low or worried                                       | Definite (1)            |
| 12122  | Depression medication review                                 | Possible depression (2) |
| 12399  | Depression annual review                                     | Possible depression (2) |
| 30405  | Depression interim review                                    | Possible depression (2) |
| 44848  | Depression management programme                              | Possible depression (2) |
| 30583  | Depression - enhanced services administration                | Possible depression (2) |
| 42931  | On depression register                                       | Possible depression (2) |
| 48970  | Exception reporting: depression quality indicators           | Possible depression (2) |
| 51258  | Depression monitoring administration                         | Possible depression (2) |

|        |                                                              |                         |
|--------|--------------------------------------------------------------|-------------------------|
| 65435  | Depression - enhanced service completed                      | Possible depression (2) |
| 71009  | Depression monitoring first letter                           | Possible depression (2) |
| 72966  | Depression monitoring second letter                          | Possible depression (2) |
| 85852  | Depression monitoring telephone invite                       | Possible depression (2) |
| 88644  | Depression monitoring verbal invite                          | Possible depression (2) |
| 91105  | Depression monitoring third letter                           | Possible depression (2) |
| 96995  | On full dose long term treatment depression - enh serv admin | Possible depression (2) |
| 28970  | Excepted from depression quality indicators: Patient unsuita | Possible depression (2) |
| 30405  | Depression interim review                                    | Possible depression (2) |
| 30483  | Patient given advice about management of depression          | Possible depression (2) |
| 100977 | Suspected depression                                         | Possible depression (2) |
| 11055  | [X]Schizoaffective disorder, depressive type                 | Non-specific/other (3)  |
| 20785  | [X]Post-schizophrenic depression                             | Non-specific/other (3)  |
| 35274  | [X]Schizoaffective psychosis, depressive type                | Non-specific/other (3)  |
| 41022  | [X]Schizophreniform psychosis, depressive type               | Non-specific/other (3)  |
| 8584   | [X]Depressive neurosis                                       | Non-specific/other (3)  |
| 7737   | [X]Neurotic depression                                       | Non-specific/other (3)  |
| 7953   | [X]Dysthymia                                                 | Non-specific/other (3)  |
| 10290  | [X]Depressive personality disorder                           | Non-specific/other (3)  |
| 10455  | Depressive personality disorder                              | Non-specific/other (3)  |
| 15220  | [X]Persistant anxiety depression                             | Non-specific/other (3)  |
| 1131   | Neurotic depression reactive type                            | Non-specific/other (3)  |
| 21887  | Senile dementia with depression                              | Non-specific/other (3)  |
| 27677  | Presenile dementia with depression                           | Non-specific/other (3)  |
| 27759  | [X] Senile dementia, depressed or paranoid type              | Non-specific/other (3)  |
| 41089  | Senile dementia with depressive or paranoid features NOS     | Non-specific/other (3)  |
| 43292  | Arteriosclerotic dementia with depression                    | Non-specific/other (3)  |
| 44674  | Senile dementia with depressive or paranoid features         | Non-specific/other (3)  |
| 2972   | Postviral depression                                         | Non-specific/other (3)  |
| 29527  | [D]Postoperative depression                                  | Non-specific/other (3)  |
| 46244  | Drug-induced depressive state                                | Non-specific/other (3)  |
| 2639   | Postnatal depression                                         | Non-specific/other (3)  |
| 103677 | [X]Antenatal depression                                      | Non-specific/other (3)  |
| 2923   | Puerperal depression                                         | Non-specific/other (3)  |
| 4979   | [X]Postpartum depression NOS                                 | Non-specific/other (3)  |
| 13307  | [X]Postnatal depression NOS                                  | Non-specific/other (3)  |
| 19054  | [X]Recurrent brief depressive episodes                       | Non-specific/other (3)  |
| 55384  | Recurrent major depressive episodes, in full remission       | Non-specific/other (3)  |
| 56273  | Recurrent major depressive episodes,partial/unspec remission | Non-specific/other (3)  |
| 22116  | [X]Recurrent depressive disorder, currently in remission     | Non-specific/other (3)  |
| 43324  | Single major depressive episode, partial or unspec remission | Non-specific/other (3)  |
| 2716   | H/O: depression                                              | Non-specific/other (3)  |
| 19439  | Depression resolved                                          | Non-specific/other (3)  |
| 57409  | Single major depressive episode, in full remission           | Non-specific/other (3)  |

| <i>Phobic anxiety</i> |                                                  |                        |
|-----------------------|--------------------------------------------------|------------------------|
| 1723                  | Claustrophobia                                   | Definite (1)           |
| 1907                  | Phobic disorders                                 | Definite (1)           |
| 2300                  | Phobia unspecified                               | Definite (1)           |
| 2366                  | Dental phobia                                    | Definite (1)           |
| 2571                  | [X]Agoraphobia                                   | Definite (1)           |
| 3076                  | Agoraphobia with panic attacks                   | Definite (1)           |
| 7222                  | [X]Phobia NOS                                    | Definite (1)           |
| 9386                  | [X]Phobic anxiety disorders                      | Definite (1)           |
| 9785                  | [X]Specific (isolated) phobias                   | Definite (1)           |
| 9944                  | Phobic anxiety                                   | Definite (1)           |
| 11280                 | [X]Claustrophobia                                | Definite (1)           |
| 11602                 | [X]Social phobias                                | Definite (1)           |
| 12508                 | [X]Needle phobia                                 | Definite (1)           |
| 12635                 | [X]Simple phobia                                 | Definite (1)           |
| 12838                 | Agoraphobia without mention of panic attacks     | Definite (1)           |
| 14729                 | Phobic disorder NOS                              | Definite (1)           |
| 14890                 | [X]Panic disorder with agoraphobia               | Definite (1)           |
| 16199                 | Social phobia, fear of eating in public          | Definite (1)           |
| 16638                 | Social phobic disorders                          | Definite (1)           |
| 16729                 | [X]Agoraphobia without history of panic disorder | Definite (1)           |
| 18248                 | [X]Animal phobias                                | Definite (1)           |
| 18603                 | Social phobia, fear of public washing            | Definite (1)           |
| 20802                 | Flying phobia                                    | Definite (1)           |
| 25749                 | Phobia counselling                               | Possible phobia (2)    |
| 27685                 | [X]Other phobic anxiety disorders                | Definite (1)           |
| 28106                 | Acrophobia                                       | Definite (1)           |
| 28938                 | Animal phobia                                    | Definite (1)           |
| 31957                 | Social phobia, fear of public speaking           | Definite (1)           |
| 42788                 | [X]Social neurosis                               | Definite (1)           |
| 34064                 | [X]Phobic anxiety disorder, unspecified          | Definite (1)           |
| 42788                 | [X]Social neurosis                               | Definite (1)           |
| 63521                 | Antiphobic therapy                               | Possible phobia (2)    |
| 67898                 | [X]Phobic state NOS                              | Definite (1)           |
| 67965                 | [X]Acrophobia                                    | Definite (1)           |
| 4167                  | Fear of flying                                   | Definite (1)           |
| 5347                  | Fear                                             | Definite (1)           |
| 10390                 | Fear of death                                    | Definite (1)           |
| 18672                 | Specific fear                                    | Definite (1)           |
| 26331                 | O/E - fearful mood                               | Definite (1)           |
| 28129                 | Examination fear                                 | Definite (1)           |
| 31672                 | Fear of crowds                                   | Definite (1)           |
| 53067                 | Encounter for fear                               | Definite (1)           |
| 3407                  | H/O: anxiety state                               | Non-specific/other (3) |

| <i>Other anxiety disorder</i> |                                                 |                      |
|-------------------------------|-------------------------------------------------|----------------------|
| 462                           | Panic attack                                    | Definite (1)         |
| 636                           | Anxiety states                                  | Definite (1)         |
| 655                           | Anxiety with depression                         | Definite (1)         |
| 962                           | [X]Anxiety neurosis                             | Definite (1)         |
| 1758                          | Chronic anxiety                                 | Definite (1)         |
| 4069                          | Panic disorder                                  | Definite (1)         |
| 4081                          | [X]Panic state                                  | Definite (1)         |
| 4534                          | Anxiety state NOS                               | Definite (1)         |
| 4634                          | Recurrent anxiety                               | Definite (1)         |
| 4659                          | Generalised anxiety disorder                    | Definite (1)         |
| 5385                          | [X]Other anxiety disorders                      | Definite (1)         |
| 6408                          | [X]Panic attack                                 | Definite (1)         |
| 6939                          | Anxiety state unspecified                       | Definite (1)         |
| 7749                          | [X]Mild anxiety depression                      | Definite (1)         |
| 7999                          | Anxiety counselling                             | Possible anxiety (2) |
| 8205                          | [X]Panic disorder [episodic paroxysmal anxiety] | Definite (1)         |
| 9125                          | Anxiety management training                     | Possible anxiety (2) |
| 10344                         | [X]Generalized anxiety disorder                 | Definite (1)         |
| 11913                         | [X]Mixed anxiety and depressive disorder        | Definite (1)         |
| 22159                         | Acknowledging anxiety                           | Possible anxiety (2) |
| 23838                         | [X]Anxiety disorder, unspecified                | Definite (1)         |
| 24066                         | [X]Other specified anxiety disorders            | Definite (1)         |
| 25638                         | [X]Anxiety NOS                                  | Definite (1)         |
| 26295                         | Reducing anxiety                                | Possible anxiety (2) |
| 28167                         | [X]Anxiety hysteria                             | Definite (1)         |
| 28381                         | Alleviating anxiety                             | Possible anxiety (2) |
| 44321                         | [X]Other mixed anxiety disorders                | Definite (1)         |
| 962                           | [X]Anxiety neurosis                             | Definite (1)         |
| 50191                         | [X]Anxiety state                                | Definite (1)         |
| 62935                         | Recognising anxiety                             | Possible anxiety (2) |
| 131                           | Anxiousness                                     | Definite (1)         |
| 514                           | Tension - nervous                               | Definite (1)         |
| 2509                          | [D]Nervousness                                  | Definite (1)         |
| 2524                          | Worried                                         | Definite (1)         |
| 3328                          | General nervous symptoms                        | Definite (1)         |
| 3586                          | nerves                                          | Definite (1)         |
| 5902                          | Anxiousness - symptom                           | Definite (1)         |
| 10723                         | [D]Nervous tension                              | Definite (1)         |
| 11890                         | C/O - panic attack                              | Definite (1)         |
| 19000                         | O/E - panic attack                              | Definite (1)         |
| 20089                         | General nervous symptom NOS                     | Definite (1)         |
| 20163                         | Apprehension                                    | Definite (1)         |
| 20375                         | [V]"Worried well"                               | Definite (1)         |

|       |                             |                        |
|-------|-----------------------------|------------------------|
| 28408 | Worried well                | Definite (1)           |
| 29608 | nervousness                 | Definite (1)           |
| 93401 | Anxious                     | Definite (1)           |
| 35825 | [X]Anxiety reaction         | Definite (1)           |
| 17853 | [D]Nerves                   | Definite (1)           |
| 8725  | O/E - nervous               | Definite (1)           |
| 13124 | O/E - anxious               | Definite (1)           |
| 19129 | Frightened                  | Definite (1)           |
| 20773 | [X]Organic anxiety disorder | Non-specific/other (3) |
| 3407  | H/O: anxiety state          | Non-specific/other (3) |

---

*Severe stress and adjustment disorder*

|       |                                                              |  |
|-------|--------------------------------------------------------------|--|
| 276   | Acute reaction to stress                                     |  |
| 4171  | [X]Post - traumatic stress disorder                          |  |
| 7813  | [X]Psychic shock                                             |  |
| 10535 | [X]Acute reaction to stress                                  |  |
| 11098 | [X]Reaction to severe stress, and adjustment disorders       |  |
| 11607 | [X]Acute stress reaction                                     |  |
| 15551 | Acute stupor state due to acute stress reaction              |  |
| 20245 | Acute situational disturbance                                |  |
| 21559 | [X]Crisis state                                              |  |
| 21753 | [X]Other reactions to severe stress                          |  |
| 23869 | Stress reaction causing mixed disturbance of emotion/conduct |  |
| 24847 | Acute posttrauma stress state                                |  |
| 26138 | Acute stress reaction NOS                                    |  |
| 29707 | Other acute stress reaction NOS                              |  |
| 31515 | [X]Reaction to severe stress, unspecified                    |  |
| 32182 | [X]Traumatic neurosis                                        |  |
| 32387 | Other post-traumatic stress disorder                         |  |
| 36374 | [X]Acute crisis reaction                                     |  |
| 38640 | Other acute stress reactions                                 |  |
| 42737 | Acute fugue state due to acute stress reaction               |  |
| 43550 | Combat fatigue                                               |  |
| 70779 | [X]Combat fatigue                                            |  |
| 2826  | Adjustment reaction                                          |  |
| 6075  | Adjustment reaction with aggression                          |  |
| 8250  | [D]State of emotional shock and stress, unspecified          |  |
| 11336 | [X]Adjustment disorders                                      |  |
| 15665 | Adjustment reaction with disturbance of other emotion NOS    |  |
| 16415 | Adjustment reaction with predominant disturbance of conduct  |  |
| 19921 | Other adjustment reaction with withdrawal                    |  |
| 23462 | Other adjustment reactions NOS                               |  |
| 27390 | Adjustment reaction due to hospitalisation                   |  |

|        |                                                              |
|--------|--------------------------------------------------------------|
| 35632  | Adjustment reaction with physical symptoms                   |
| 35914  | Adjustment reaction with antisocial behaviour                |
| 37669  | Adjustment reaction NOS                                      |
| 41455  | Other adjustment reactions                                   |
| 48588  | Adjustment reaction with mixed disturbance of emotion        |
| 56020  | [X]State of emotional shock and stress, unspecified          |
| 56924  | Adjustment reaction with anxious mood                        |
| 66398  | Adjustment reaction with destructiveness                     |
| 101725 | [X]Chron post-traumatic stress disorder follow military comb |
| 101785 | [X]Acute post-traumatic stress disorder follow military comb |
| 104891 | Adjustment reaction with predominant disturbance conduct NOS |
| 32182  | [X]Traumatic neurosis                                        |
| 36228  | [X]Culture shock                                             |
| 58013  | Culture shock                                                |
| 2775   | Grief reaction                                               |
| 21197  | [X]Grief reaction                                            |
| 56924  | Adjustment reaction with anxious mood                        |
| 11940  | Acute panic state due to acute stress reaction               |
| 1533   | Brief depressive reaction                                    |
| 16632  | Prolonged depressive reaction                                |
| 28248  | [X]Prolonged single episode of reactive depression           |
| 28863  | [X]Single episode of reactive depressive psychosis           |
| 36246  | Brief depressive reaction NOS                                |

*Referral to mental health service*

|       |                                                       |
|-------|-------------------------------------------------------|
| 1690  | Refer to psychologist                                 |
| 2189  | Psychiatric referral                                  |
| 5338  | Referral to psychogeriatrician                        |
| 9868  | Referral to psychiatric nurse                         |
| 10002 | Referral to psychiatrist                              |
| 10236 | Referral to community mental health team              |
| 10669 | Referral to psychotherapist                           |
| 10828 | Referral to mental health counsellor                  |
| 10967 | Refer to psychologist                                 |
| 11270 | Referral to psychologist                              |
| 11449 | Referral to mental health crisis team                 |
| 11958 | Referral to psychotherapist                           |
| 12053 | Referral to mental health team                        |
| 12365 | Referral to older age community mental health team    |
| 12447 | Referral to primary care mental health gateway worker |
| 13677 | Private referral to psychiatrist                      |
| 13703 | Referral to non NHS mental health community service   |
| 18956 | Referral to bereavement counsellor                    |

|        |                                                              |
|--------|--------------------------------------------------------------|
| 24504  | Refer to mental health worker                                |
| 25950  | Referral to clinical physiologist                            |
| 26178  | Referral to psychosis early intervention service             |
| 27640  | Psychiatric self-referral                                    |
| 28925  | Referral for guided self-help for anxiety                    |
| 30861  | Referral to nurse behavioural therapist                      |
| 32841  | Referral for guided self-help for depression                 |
| 34532  | Private referral to psychogeriatrician                       |
| 34538  | Referral to nurse psychotherapist                            |
| 36728  | Referral to liaison psychiatrist                             |
| 40894  | Referral to psychiatrist for mental handicap                 |
| 41040  | Referral to primary care mental health graduate worker       |
| 41071  | Referral for mental health self-help literature              |
| 41267  | Referral to complementary therapist                          |
| 42932  | Referral to bereavement counsellor                           |
| 44910  | Referral to rehabilitation psychiatrist                      |
| 84212  | Referral to primary care mental health team                  |
| 95163  | Emergency voluntary psychiatric admission Mental Health Act  |
| 95936  | Urgent referral to psychiatrist                              |
| 97420  | Referral to improving access to psychological therapies prog |
| 99630  | Referral for cognitive behavioural therapy                   |
| 100992 | Improving Access to Psychological Therapies pro phobia scale |
| 105244 | Referral to IAPT (imp acc to psych thera) programme declined |
| 105357 | Private referral to psychologist                             |
| 102636 | Patient initiated encounter with mental health crisis team   |
| 10308  | Under care of mental health team                             |
| 108558 | Under care of mental health in-reach team                    |
| 32602  | Under care of mental health counsellor                       |
| 11425  | Seen by mental health counsellor                             |

*BNF codes for antidepressant drugs (for sensitivity analysis)*

BNF section 4.3.2 Monoamine oxidase inhibitors

BNF section 4.3.4. Other antidepressants

BNF section 4.3.3. Serotonin re-uptake inhibitors (SSRIs) antidepressants

BNF section 4.3.1. Tricyclic antidepressants (TCAs)

\*We will not include psychiatric disorders limited to childhood. Organic depression/anxiety will be included in the "non-specific/other" group, they are not classified with depression according to the ICD-10. Similarly, codes which are unspecific with regard to timing (codes indicating e.g. remission) will be categorised as non-specific/other. Furthermore, "non-specific/other depression" includes also codes for schizoaffective disorder with depression, post-schizophrenic depression, drug-induced depression, depression in association with pregnancy, and dysthymia.



Table 2. *Preliminary* list of HES codes

| <b>ICD-10 code</b>                  | <b>Text descriptor</b>                                                                 | <b>Group (if applicable)</b> |
|-------------------------------------|----------------------------------------------------------------------------------------|------------------------------|
| <i>Herpes zoster</i>                |                                                                                        |                              |
| B02                                 | Zoster [herpes zoster]                                                                 |                              |
| <i>Chronic zoster complications</i> |                                                                                        |                              |
| G530                                | Postzoster neuralgia                                                                   |                              |
| <i>Depression</i>                   |                                                                                        |                              |
| F320                                | Mild depressive episode                                                                | Definite (1)                 |
| F321                                | Moderate depressive episode                                                            | Definite (1)                 |
| F322                                | Severe depressive episode without psychotic symptoms                                   | Definite (1)                 |
| F323                                | Severe depressive episode with psychotic symptoms                                      | Definite (1)                 |
| F328                                | Other depressive episodes                                                              | Definite (1)                 |
| F329                                | Depressive episode, unspecified                                                        | Definite (1)                 |
| F331                                | Recurrent depressive disorder, current episode moderate                                | Definite (1)                 |
| F332                                | Recurrent depressive disorder, current episode severe without psychotic symptoms       | Definite (1)                 |
| F333                                | Recurrent depressive disorder, current episode severe with psychotic symptoms          | Definite (1)                 |
| F330                                | Recurrent depressive disorder, current episode mild                                    | Definite (1)                 |
| F334                                | Recurrent depressive disorder, currently in remission                                  | Non-specific/other (3)       |
| F338                                | Other recurrent depressive disorders                                                   | Definite (1)                 |
| F339                                | Recurrent depressive disorder, unspecified                                             | Definite (1)                 |
| F25                                 | Schizoaffective disorder                                                               | Non-specific/other (3)       |
| F250                                | Schizoaffective disorder, manic type                                                   | Non-specific/other (3)       |
| F251                                | Schizoaffective disorder, depressive tyoe                                              | Non-specific/other (3)       |
| F252                                | Schizoaffective disorder, mixed manio-depressive type                                  | Non-specific/other (3)       |
| F258                                | Schizoaffective disorder, other type                                                   | Non-specific/other (3)       |
| F259                                | Schizoaffective disorder, unspecified                                                  | Non-specific/other (3)       |
| F204                                | Post-schizophrenic depression                                                          | Non-specific/other (3)       |
| F0003                               | Dementia in early onset Alzheimers disease with depressive symptoms                    | Non-specific/other (3)       |
| F0013                               | Dementia in late onset Alzheimers disease with depressive symptoms                     | Non-specific/other (3)       |
| F0023                               | Dementia in atypical Alzheimers disease with depressive symptoms                       | Non-specific/other (3)       |
| F0093                               | Dementia in Alzheimers disease with depressive symptoms, without further specification | Non-specific/other (3)       |
| F0103                               | Vascular dementia with acute debut with depressive symptoms                            | Non-specific/other (3)       |
| F0113                               | Multi-infarction dementia with depressive symptoms                                     | Non-specific/other (3)       |
| F0123                               | Subcortical vascular dementia with depressive symptoms                                 | Non-specific/other (3)       |
| F0133                               | Mixed cortical and subcortical vascular dementia with depressive symptoms              | Non-specific/other (3)       |

|                                       |                                                                           |                        |
|---------------------------------------|---------------------------------------------------------------------------|------------------------|
| F0183                                 | Other vascular dementia with depressive symptoms                          | Non-specific/other (3) |
| F0193                                 | Vascular dementia with depressive symptoms, without further specification | Non-specific/other (3) |
| F0203                                 | Dementia in Picks disease with depressive symptoms                        | Non-specific/other (3) |
| F0213                                 | Dementia in Creutzfeldt-Jakobs disease with depressive symptoms           | Non-specific/other (3) |
| F0223                                 | Dementia in Huntingtons disease with depressive symptoms                  | Non-specific/other (3) |
| F0233                                 | Dementia in Parkinsons disease with depressive symptoms                   | Non-specific/other (3) |
| F0243                                 | Dementia in HIV with depressive symptoms                                  | Non-specific/other (3) |
| F0283                                 | Dementia with depressive symptoms in other disease                        | Non-specific/other (3) |
| F0393                                 | Dementia with depressive symptoms, without further specification          | Non-specific/other (3) |
| F0632                                 | Organic depressive mental disease                                         | Non-specific/other (3) |
| F1x54                                 | Drug-induced depression                                                   | Non-specific/other (3) |
| F341                                  | Dysthymia                                                                 | Non-specific/other (3) |
| F530                                  | Puerperal depression                                                      | Non-specific/other (3) |
| F3810                                 | Recurrent brief depressive disorder                                       | Non-specific/other (3) |
| <i>Phobic anxiety</i>                 |                                                                           |                        |
| F40.0                                 | Agrophobia                                                                | Definite (1)           |
| F40.1                                 | Social phobias                                                            | Definite (1)           |
| F40.2                                 | Specific (isolated phobias)                                               | Definite (1)           |
| F40.8                                 | Other phobic anxiety disorders                                            | Definite (1)           |
| F40.9                                 | Phobic anxiety disorders, unspecified                                     | Definite (1)           |
| <i>Other anxiety disorders</i>        |                                                                           |                        |
| F41.0                                 | Panic disorders (episodic paroxysmal anxiety)                             | Definite (1)           |
| F41.1                                 | Generalized anxiety disorder                                              | Definite (1)           |
| F41.2                                 | Mixed anxiety and depressive disorder                                     | Definite (1)           |
| F41.3                                 | Other mixed anxiety disorders                                             | Definite (1)           |
| F41.8                                 | Other specified anxiety disorders                                         | Definite (1)           |
| F41.9                                 | Anxiety disorder, unspecified                                             | Definite (1)           |
| F064                                  | Organic anxiety disorder                                                  | Non-specific/other (3) |
| <i>Stress and adjustment disorder</i> |                                                                           |                        |
| F430                                  | Acute stress reaction                                                     |                        |
| F431                                  | Post-traumatic stress disorder                                            |                        |
| F432                                  | Adjustment disorder                                                       |                        |
| F438                                  | Other reactions to severe stress                                          |                        |
| F439                                  | Reaction to severe stress, unspecified                                    |                        |



## Appendix: Final code lists

|                                          |     |
|------------------------------------------|-----|
| Herpes zoster                            | 3   |
| Longer-term zoster complications         | 5   |
| Depression                               | 6   |
| Anxiety disorder                         | 10  |
| Partner bereavement                      | 13  |
| Residence in communal establishment      | 14  |
| Stress and adjustment disorder           | 16  |
| Referral to mental health service        | 18  |
| Antidepressants                          | 20  |
| Rheumatoid arthritis                     | 36  |
| Lupus erythematosus                      | 39  |
| Chronic obstructive pulmonary disease    | 42  |
| Asthma                                   | 45  |
| Antiasthmatics                           | 48  |
| Inhaled steroids                         | 71  |
| Chronic kidney disease                   | 79  |
| Diabetes                                 | 85  |
| Antidiabetics                            | 101 |
| Human immunodeficiency virus infection   | 119 |
| Lymphoma                                 | 122 |
| Leukaemia                                | 131 |
| Myeloma                                  | 136 |
| Haematopoietic stem cell transplantation | 137 |
| Other immunosuppressive disease          | 139 |
| Oral glucocorticoids                     | 141 |
| Other immunosuppressants                 | 146 |
| Solid organ transplant                   | 164 |
| Alcohol use                              | 167 |
| Smoking                                  | 173 |
| Myocardial infarction                    | 181 |
| Other ischaemic heart disease            | 184 |
| Hypertension                             | 192 |

|                            |     |
|----------------------------|-----|
| Alcoholic liver disease    | 195 |
| Pancreatitis               | 197 |
| Peripheral artery disease  | 198 |
| Heart failure              | 204 |
| Cerebrovascular disease    | 206 |
| Charlson Comorbidity Index | 215 |

## Herpes zoster

| Medcode | Readterm                                                     |
|---------|--------------------------------------------------------------|
| 390     | Herpes zoster                                                |
| 516     | Shingles                                                     |
| 7331    | Ramsey Hunt Syndrome                                         |
| 8936    | Ophthalmic herpes zoster infection                           |
| 14718   | Herpes zoster with ophthalmic complication                   |
| 14793   | Herpes zoster otitis externa                                 |
| 18918   | Herpes zoster ophthalmicus                                   |
| 21069   | Herpes zoster with unspecified complication                  |
| 21471   | Herpes zoster NOS                                            |
| 25320   | Herpes zoster with dermatitis of eyelid                      |
| 27403   | Geniculate herpes zoster                                     |
| 27546   | Herpes zoster with keratoconjunctivitis                      |
| 31681   | Herpes zoster - otitis externa                               |
| 33810   | Herpes zoster with other ophthalmic complication             |
| 38531   | Herpes zoster with other specified complication NOS          |
| 39692   | Polyneuropathy in herpes zoster                              |
| 43235   | Herpes zoster with other specified complication              |
| 44944   | Herpes zoster with meningitis                                |
| 47375   | Zoster encephalitis                                          |
| 50537   | Herpes zoster with other CNS complications                   |
| 51692   | Encephalitis due to herpes zoster                            |
| 52126   | Herpes zoster with other central nervous system complication |
| 52319   | Disseminated zoster                                          |
| 55940   | Herpes zoster iridocyclitis                                  |
| 57895   | Herpes zoster meningitis                                     |
| 62558   | Infective otitis externa due to herpes zoster                |
| 63739   | Herpes zoster with other CNS complication NOS                |
| 69405   | Herpes zoster encephalitis                                   |
| 70197   | [X]Zoster without complications                              |
| 71464   | Meningitis due to herpes zoster virus                        |
| 105157  | Hutchinson's sign - herpes zoster involving nose tip         |

| ICD-10 code | ICD term              |
|-------------|-----------------------|
| B02         | Herpes zoster         |
| B02.0       | Zoster encephalitis   |
| B02.1       | Zoster meningitis     |
| B02.3       | Zoster ocular disease |
| B02.7       | Disseminated zoster   |

|       |                                 |
|-------|---------------------------------|
| B02.8 | Zoster with other complications |
| B02.9 | Zoster without complications    |

### Longer-term zoster complications

| Medcode | Readterm                           |
|---------|------------------------------------|
| 1598    | Post-herpetic neuralgia            |
| 7584    | Post-herpetic trigeminal neuralgia |
| 10223   | Postherpetic neuralgia             |
| 11498   | Postherpetic trigeminal neuralgia  |
| 17180   | Postzoster neuralgia               |
| 31709   | Postherpetic polyneuropathy        |

| ICD-10 code | ICD term                          |
|-------------|-----------------------------------|
| B02.2       | Zoster other nervous complication |
| G53.0       | PHN or Ramsey Hunt                |



## Depression

| Medcode | Readterm                                                  | Subgroup |
|---------|-----------------------------------------------------------|----------|
| 324     | Depressive disorder NEC                                   | Definite |
| 543     | [X]Depression NOS                                         | Definite |
| 595     | Endogenous depression                                     | Definite |
| 1055    | Agitated depression                                       | Definite |
| 1908    | O/E - depressed                                           | Definite |
| 1996    | Depressed                                                 | Definite |
| 2147    | Poor self esteem                                          | Definite |
| 2560    | Depressive psychoses                                      | Definite |
| 2930    | C/O - feeling unhappy                                     | Definite |
| 2970    | [X]Depressive episode, unspecified                        | Definite |
| 3291    | [X]Depressive disorder NOS                                | Definite |
| 3292    | [X]Recurrent depressive disorder                          | Definite |
| 4323    | Chronic depression                                        | Definite |
| 4639    | [X]Depressive episode                                     | Definite |
| 4824    | C/O - feeling depressed                                   | Definite |
| 5879    | Agitated depression                                       | Definite |
| 6482    | Recurrent depression                                      | Definite |
| 6546    | Endogenous depression first episode                       | Definite |
| 6854    | [X]Other depressive episodes                              | Definite |
| 6932    | Endogenous depression - recurrent                         | Definite |
| 6950    | Endogenous depression first episode                       | Definite |
| 7011    | Single major depressive episode NOS                       | Definite |
| 7412    | Loss of confidence                                        | Definite |
| 8826    | [X]SAD - Seasonal affective disorder                      | Definite |
| 8928    | Low mood                                                  | Definite |
| 9183    | Masked depression                                         | Definite |
| 9211    | [X]Moderate depressive episode                            | Definite |
| 9667    | [X]Severe depressive episode without psychotic symptoms   | Definite |
| 9796    | Symptoms of depression                                    | Definite |
| 10015   | Depressed mood                                            | Definite |
| 10438   | Depressive symptoms                                       | Definite |
| 10610   | Single major depressive episode                           | Definite |
| 10667   | [X]Mild depression                                        | Definite |
| 10720   | [X]Atypical depression                                    | Definite |
| 10825   | Seasonal affective disorder                               | Definite |
| 11252   | [X]Major depression, recurrent without psychotic symptoms | Definite |
| 11329   | [X]Endogenous depression without psychotic symptoms       | Definite |
| 11717   | [X]Mild depressive episode                                | Definite |
| 12099   | [X]Severe depressive episode with psychotic symptoms      | Definite |
| 14709   | Recurrent major depressive episodes, moderate             | Definite |

|       |                                                              |          |
|-------|--------------------------------------------------------------|----------|
| 15099 | Recurrent major depressive episode                           | Definite |
| 15155 | Single major depressive episode, moderate                    | Definite |
| 15219 | Single major depressive episode, severe, without psychosis   | Definite |
| 16506 | Single major depressive episode, mild                        | Definite |
| 16861 | [X]Recurrent severe episodes of psychotic depression         | Definite |
| 18510 | [X]Single episode of psychogenic depression                  | Definite |
| 19696 | [X]Recurrent episodes of psychogenic depression              | Definite |
| 22806 | [X]Single episode major depression w/out psychotic symptoms  | Definite |
| 23731 | [X]Endogenous depression with psychotic symptoms             | Definite |
| 24112 | [X]Single episode of psychotic depression                    | Definite |
| 24117 | [X]Single episode of major depression and psychotic symptoms | Definite |
| 24171 | Recurrent major depressive episodes, severe, with psychosis  | Definite |
| 25435 | Loss of capacity for enjoyment                               | Definite |
| 25563 | Recurrent major depressive episode NOS                       | Definite |
| 25697 | Recurrent major depressive episodes, severe, no psychosis    | Definite |
| 26028 | Sad mood                                                     | Definite |
| 27491 | Atypical depressive disorder                                 | Definite |
| 28756 | [X]Seasonal depressive disorder                              | Definite |
| 29342 | Recurrent major depressive episodes, mild                    | Definite |
| 29520 | [X]Recurrent depressive disorder, current episode moderate   | Definite |
| 29784 | [X]Recurrent depressive disorder, current episode mild       | Definite |
| 30740 | Loss of interest                                             | Definite |
| 31757 | [X]Recurr severe episodes/psychogenic depressive psychosis   | Definite |
| 32159 | Single major depressive episode, severe, with psychosis      | Definite |
| 32941 | [X]Recurr severe episodes/major depression+psychotic symptom | Definite |
| 33469 | [X]Recurr depress disorder cur epi severe without psyc sympt | Definite |
| 34390 | Single major depressive episode, unspecified                 | Definite |
| 35671 | Recurrent major depressive episodes, unspecified             | Definite |
| 36616 | [X]Monopolar depression NOS                                  | Definite |
| 41989 | [X]Single episode agitated depressn w/out psychotic symptoms | Definite |
| 44300 | [X]Recurrent depressive disorder, unspecified                | Definite |
| 47009 | [X]Recurrent depress disorder cur epi severe with psyc symp  | Definite |
| 47731 | [X]Other recurrent depressive disorders                      | Definite |
| 52678 | [X]Single episode of psychogenic depressive psychosis        | Definite |
| 53148 | Loss of hope for the future                                  | Definite |
| 56609 | [X]Single episode of masked depression NOS                   | Definite |
| 59386 | [X]Single episode vital depression w/out psychotic symptoms  | Definite |
| 59869 | Loss of interest in previously enjoyable activity            | Definite |
| 73991 | [X]Vital depression, recurrent without psychotic symptoms    | Definite |
| 98252 | [X]Major depression, moderately severe                       | Definite |
| 98346 | [X]Major depression, mild                                    | Definite |
| 98414 | [X]Major depression, severe without psychotic symptoms       | Definite |
| 98417 | [X]Major depression, severe with psychotic symptoms          | Definite |

|        |                                                               |                  |
|--------|---------------------------------------------------------------|------------------|
| 5987   | [X] Reactive depression NOS                                   | Definite         |
| 7604   | [X]Single episode of reactive depression                      | Definite         |
| 8478   | Reactive depressive psychosis                                 | Definite         |
| 8851   | [X]Recurrent episodes of depressive reaction                  | Definite         |
| 8902   | [X]Recurrent episodes of reactive depression                  | Definite         |
| 9055   | [X]Single episode of depressive reaction                      | Definite         |
| 17770  | Psychotic reactive depression                                 | Definite         |
| 37764  | [X]Recurrent severe episodes/reactive depressive psychosis    | Definite         |
| 101422 | Feeling low or worried                                        | Definite         |
| 12122  | Depression medication review                                  | Possible         |
| 12399  | Depression annual review                                      | Possible         |
| 43239  | Excepted from depression quality indicators: Informed dissent | Possible         |
| 28970  | Excepted from depression quality indicators: Patient unsuita  | Possible         |
| 30405  | Depression interim review                                     | Possible         |
| 30483  | Patient given advice about management of depression           | Possible         |
| 30583  | Depression - enhanced services administration                 | Possible         |
| 42931  | On depression register                                        | Possible         |
| 44848  | Depression management programme                               | Possible         |
| 48970  | Exception reporting: depression quality indicators            | Possible         |
| 51258  | Depression monitoring administration                          | Possible         |
| 65435  | Depression - enhanced service completed                       | Possible         |
| 71009  | Depression monitoring first letter                            | Possible         |
| 72966  | Depression monitoring second letter                           | Possible         |
| 85852  | Depression monitoring telephone invite                        | Possible         |
| 88644  | Depression monitoring verbal invite                           | Possible         |
| 91105  | Depression monitoring third letter                            | Possible         |
| 96995  | On full dose long term treatment depression - enh serv admin  | Possible         |
| 100977 | Suspected depression                                          | Possible         |
| 11055  | [X]Schizoaffective disorder, depressive type                  | Unspecific/other |
| 20785  | [X]Post-schizophrenic depression                              | Unspecific/other |
| 35274  | [X]Schizoaffective psychosis, depressive type                 | Unspecific/other |
| 41022  | [X]Schizophreniform psychosis, depressive type                | Unspecific/other |
| 8584   | [X]Depressive neurosis                                        | Unspecific/other |
| 7737   | [X]Neurotic depression                                        | Unspecific/other |
| 7953   | [X]Dysthymia                                                  | Unspecific/other |
| 10290  | [X]Depressive personality disorder                            | Unspecific/other |
| 10455  | Depressive personality disorder                               | Unspecific/other |
| 15220  | [X]Persistant anxiety depression                              | Unspecific/other |
| 1131   | Neurotic depression reactive type                             | Unspecific/other |
| 21887  | Senile dementia with depression                               | Unspecific/other |
| 27677  | Presenile dementia with depression                            | Unspecific/other |
| 27759  | [X] Senile dementia, depressed or paranoid type               | Unspecific/other |
| 41089  | Senile dementia with depressive or paranoid features NOS      | Unspecific/other |

|        |                                                              |                  |
|--------|--------------------------------------------------------------|------------------|
| 43292  | Arteriosclerotic dementia with depression                    | Unspecific/other |
| 44674  | Senile dementia with depressive or paranoid features         | Unspecific/other |
| 2972   | Postviral depression                                         | Unspecific/other |
| 29527  | [D]Postoperative depression                                  | Unspecific/other |
| 46244  | Drug-induced depressive state                                | Unspecific/other |
| 2639   | Postnatal depression                                         | Unspecific/other |
| 103677 | [X]Antenatal depression                                      | Unspecific/other |
| 2923   | Puerperal depression                                         | Unspecific/other |
| 4979   | [X]Postpartum depression NOS                                 | Unspecific/other |
| 13307  | [X]Postnatal depression NOS                                  | Unspecific/other |
| 19054  | [X]Recurrent brief depressive episodes                       | Unspecific/other |
| 55384  | Recurrent major depressive episodes, in full remission       | Unspecific/other |
| 56273  | Recurrent major depressive episodes,partial/unspec remission | Unspecific/other |
| 22116  | [X]Recurrent depressive disorder, currently in remission     | Unspecific/other |
| 101153 | [X]Recurr major depr ep, severe with psych, psych in remiss  | Unspecific/other |

| ICD-10 code | ICD term                                                                         | Subgroup         |
|-------------|----------------------------------------------------------------------------------|------------------|
| F32         | Depressive episode                                                               | Definite         |
| F32.0       | Mild depressive episode                                                          | Definite         |
| F32.1       | Moderate depressive episode                                                      | Definite         |
| F32.2       | Severe depressive episode without psychotic symptoms                             | Definite         |
| F32.3       | Severe depressive episode with psychotic symptoms                                | Definite         |
| F32.8       | Other depressive episodes                                                        | Definite         |
| F32.9       | Depressive episode, unspecified                                                  | Definite         |
| F33         | Recurrent depressive disorder                                                    | Definite         |
| F33.0       | Recurrent depressive disorder, current episode mild                              | Definite         |
| F33.1       | Recurrent depressive disorder, current episode moderate                          | Definite         |
| F33.2       | Recurrent depressive disorder, current episode severe without psychotic symptoms | Definite         |
| F33.3       | Recurrent depressive disorder, current episode severe with psychotic symptoms    | Definite         |
| F33.4       | Recurrent depressive disorder, currently in remission                            | Unspecific/other |
| F33.8       | Other recurrent depressive disorders                                             | Definite         |
| F33.9       | Recurrent depressive disorder, unspecified                                       | Definite         |
| F25         | Schizoaffective disorder                                                         | Unspecific/other |
| F25.0       | Schizoaffective disorder, manic type                                             | Unspecific/other |
| F25.1       | Schizoaffective disorder, depressive type                                        | Unspecific/other |
| F25.2       | Schizoaffective disorder, mixed manio-depressive type                            | Unspecific/other |
| F25.8       | Schizoaffective disorder, other type                                             | Unspecific/other |
| F25.9       | Schizoaffective disorder, unspecified                                            | Unspecific/other |
| F20.4       | Post-schizophrenic depression                                                    | Unspecific/other |
| F34.1       | Dysthymia                                                                        | Unspecific/other |
| F53.0       | Puerperal depression                                                             | Unspecific/other |

## Anxiety disorder

| Medcode | Readterm                                         | Subgroup |
|---------|--------------------------------------------------|----------|
| 1723    | Claustrophobia                                   | Definite |
| 1907    | Phobic disorders                                 | Definite |
| 2300    | Phobia unspecified                               | Definite |
| 2571    | [X]Agoraphobia                                   | Definite |
| 3076    | Agoraphobia with panic attacks                   | Definite |
| 7222    | [X]Phobia NOS                                    | Definite |
| 9386    | [X]Phobic anxiety disorders                      | Definite |
| 9785    | [X]Specific (isolated) phobias                   | Definite |
| 9944    | Phobic anxiety                                   | Definite |
| 11280   | [X]Claustrophobia                                | Definite |
| 11602   | [X]Social phobias                                | Definite |
| 12635   | [X]Simple phobia                                 | Definite |
| 12838   | Agoraphobia without mention of panic attacks     | Definite |
| 14729   | Phobic disorder NOS                              | Definite |
| 14890   | [X]Panic disorder with agoraphobia               | Definite |
| 16199   | Social phobia, fear of eating in public          | Definite |
| 16638   | Social phobic disorders                          | Definite |
| 16729   | [X]Agoraphobia without history of panic disorder | Definite |
| 18248   | [X]Animal phobias                                | Definite |
| 18603   | Social phobia, fear of public washing            | Definite |
| 25749   | Phobia counselling                               | Possible |
| 27685   | [X]Other phobic anxiety disorders                | Definite |
| 28106   | Acrophobia                                       | Definite |
| 28938   | Animal phobia                                    | Definite |
| 31957   | Social phobia, fear of public speaking           | Definite |
| 42788   | [X]Social neurosis                               | Definite |
| 34064   | [X]Phobic anxiety disorder, unspecified          | Definite |
| 63521   | Antiphobic therapy                               | Possible |
| 67898   | [X]Phobic state NOS                              | Definite |
| 67965   | [X]Acrophobia                                    | Definite |
| 31672   | Fear of crowds                                   | Definite |
| 462     | Panic attack                                     | Definite |
| 655     | Anxiety with depression                          | Definite |
| 962     | [X]Anxiety neurosis                              | Definite |
| 1758    | Chronic anxiety                                  | Definite |
| 4069    | Panic disorder                                   | Definite |
| 4081    | [X]Panic state                                   | Definite |
| 4534    | Anxiety state NOS                                | Definite |
| 4634    | Recurrent anxiety                                | Definite |
| 4659    | Generalised anxiety disorder                     | Definite |

|       |                                                 |                  |
|-------|-------------------------------------------------|------------------|
| 5385  | [X]Other anxiety disorders                      | Definite         |
| 6408  | [X]Panic attack                                 | Definite         |
| 6939  | Anxiety state unspecified                       | Definite         |
| 7749  | [X]Mild anxiety depression                      | Definite         |
| 7999  | Anxiety counselling                             | Possible         |
| 8205  | [X]Panic disorder [episodic paroxysmal anxiety] | Definite         |
| 9125  | Anxiety management training                     | Possible         |
| 10344 | [X]Generalized anxiety disorder                 | Definite         |
| 11913 | [X]Mixed anxiety and depressive disorder        | Definite         |
| 20773 | [X]Organic anxiety disorder                     | Unspecific/other |
| 22159 | Acknowledging anxiety                           | Possible         |
| 23838 | [X]Anxiety disorder, unspecified                | Definite         |
| 24066 | [X]Other specified anxiety disorders            | Definite         |
| 25638 | [X]Anxiety NOS                                  | Definite         |
| 28167 | [X]Anxiety hysteria                             | Definite         |
| 35825 | [X]Anxiety reaction                             | Definite         |
| 44321 | [X]Other mixed anxiety disorders                | Definite         |
| 50191 | [X]Anxiety state                                | Definite         |
| 62935 | Recognising anxiety                             | Possible         |
| 2366  | Dental phobia                                   | Possible         |
| 12508 | [X]Needle phobia                                | Possible         |
| 20802 | Flying phobia                                   | Possible         |
| 4167  | Fear of flying                                  | Possible         |
| 636   | Anxiety states                                  | Possible         |
| 11890 | C/O - panic attack                              | Possible         |
| 19000 | O/E - panic attack                              | Possible         |
| 26295 | Reducing anxiety                                | Possible         |
| 28381 | Alleviating anxiety                             | Possible         |

| icd   | icd_description                               | Subgroup |
|-------|-----------------------------------------------|----------|
| F40   | Phobic anxiety disorders                      | Definite |
| F40.0 | Agrophobia                                    | Definite |
| F40.1 | Social phobias                                | Definite |
| F40.2 | Specific (isolated phobias)                   | Definite |
| F40.8 | Other phobic anxiety disorders                | Definite |
| F40.9 | Phobic anxiety disorders, unspecified         | Definite |
| F41   | Other anxiety disorders                       | Definite |
| F41.0 | Panic disorders (episodic paroxysmal anxiety) | Definite |
| F41.1 | Generalized anxiety disorder                  | Definite |
| F41.2 | Mixed anxiety and depressive disorder         | Definite |
| F41.3 | Other mixed anxiety disorders                 | Definite |

|       |                                   |                  |
|-------|-----------------------------------|------------------|
| F41.8 | Other specified anxiety disorders | Definite         |
| F41.9 | Anxiety disorder, unspecified     | Definite         |
| F06.4 | Organic anxiety disorder          | Unspecific/other |

**Partner bereavement**

| <b>Medcode</b> | <b>Readterm</b>  |
|----------------|------------------|
| 207            | Death of spouse  |
| 11251          | Death of wife    |
| 12076          | Husband died     |
| 12325          | Death of husband |
| 17802          | Husband died     |
| 25097          | Death of husband |
| 28440          | Death of partner |
| 36947          | Partner dying    |



## Residence in communal establishment

| Medcode | Readterm                                                   |
|---------|------------------------------------------------------------|
| 1123    | In prison                                                  |
| 7101    | Seen in old people's home                                  |
| 7653    | Seen in nursing home                                       |
| 10993   | Discharge to nursing home                                  |
| 11419   | Lives in an old peoples home                               |
| 13359   | Lives in a nursing home                                    |
| 13360   | Nursing/other home                                         |
| 15840   | Lives in a welfare home                                    |
| 17782   | Seen in institution                                        |
| 21280   | Resident in part III accomodation                          |
| 24494   | [V]Institution resident                                    |
| 24816   | Residential care                                           |
| 24828   | Nursing home care                                          |
| 24956   | Lives in a residential home                                |
| 27360   | Part III accomodation arranged                             |
| 27425   | Part III accommodation                                     |
| 27936   | Delayed discharge to nursing home                          |
| 27968   | Residential institution                                    |
| 28655   | [V]Imprisonment                                            |
| 36096   | Part 3 accomodation                                        |
| 41505   | Patient in institution-perm.                               |
| 42191   | Discharge to residential home                              |
| 43915   | Discharge to private nursing home                          |
| 46303   | [X]Unspecified fall, occurrence in residential institution |
| 46642   | Other residential care homes managed by local authority    |
| 47055   | [V]Imprisonment and other incarceration                    |
| 49681   | Lives in care home                                         |
| 50792   | Seen in Part 3 accomodation                                |
| 52249   | Lives on council site                                      |
| 52682   | Prison medical examination                                 |
| 53140   | Local authority residential care                           |
| 53439   | [V]Prison medical                                          |
| 55276   | Lives in a community                                       |
| 59548   | Lives in an old peoples home                               |
| 66122   | Part 3 accomodation arranged                               |
| 68005   | Lives in a welfare home                                    |
| 69028   | Discharge to part III residential home                     |
| 73083   | Nursing home visit note                                    |
| 73321   | Nursing home                                               |
| 93998   | Residential home visit note                                |

|        |                                                          |
|--------|----------------------------------------------------------|
| 94070  | Provision of continuing care in nursing home             |
| 95555  | Lives in a commune                                       |
| 95795  | FP22 - removal from residential institute                |
| 99148  | Other residential care home man voluntary/private agents |
| 101003 | Home visit request by residential institution            |
| 102493 | Admission to nursing home                                |
| 102598 | Discharge to nursing home                                |
| 107443 | Care home visit for initial patient assessment           |
| 107602 | Care home visit for follow-up patient review             |
| 107757 | Care home visit                                          |

## Stress and adjustment disorder

| Medcode | Readterm                                                     |
|---------|--------------------------------------------------------------|
| 276     | Acute reaction to stress                                     |
| 1533    | Brief depressive reaction                                    |
| 2775    | Grief reaction                                               |
| 2826    | Adjustment reaction                                          |
| 4171    | [X]Post - traumatic stress disorder                          |
| 6075    | Adjustment reaction with aggression                          |
| 7813    | [X]Psychic shock                                             |
| 8250    | [D]State of emotional shock and stress, unspecified          |
| 10535   | [X]Acute reaction to stress                                  |
| 11098   | [X]Reaction to severe stress, and adjustment disorders       |
| 11336   | [X]Adjustment disorders                                      |
| 11607   | [X]Acute stress reaction                                     |
| 11940   | Acute panic state due to acute stress reaction               |
| 15551   | Acute stupor state due to acute stress reaction              |
| 15665   | Adjustment reaction with disturbance of other emotion NOS    |
| 16415   | Adjustment reaction with predominant disturbance of conduct  |
| 16632   | Prolonged depressive reaction                                |
| 19921   | Other adjustment reaction with withdrawal                    |
| 20245   | Acute situational disturbance                                |
| 21197   | [X]Grief reaction                                            |
| 21559   | [X]Crisis state                                              |
| 21753   | [X]Other reactions to severe stress                          |
| 23462   | Other adjustment reactions NOS                               |
| 23869   | Stress reaction causing mixed disturbance of emotion/conduct |
| 24847   | Acute posttrauma stress state                                |
| 26138   | Acute stress reaction NOS                                    |
| 27390   | Adjustment reaction due to hospitalisation                   |
| 28248   | [X]Prolonged single episode of reactive depression           |
| 28863   | [X]Single episode of reactive depressive psychosis           |
| 29707   | Other acute stress reaction NOS                              |
| 31515   | [X]Reaction to severe stress, unspecified                    |
| 32182   | [X]Traumatic neurosis                                        |
| 32387   | Other post-traumatic stress disorder                         |
| 35632   | Adjustment reaction with physical symptoms                   |
| 35914   | Adjustment reaction with antisocial behaviour                |
| 36228   | [X]Culture shock                                             |
| 36246   | Brief depressive reaction NOS                                |
| 36374   | [X]Acute crisis reaction                                     |
| 37669   | Adjustment reaction NOS                                      |
| 38640   | Other acute stress reactions                                 |

|        |                                                              |
|--------|--------------------------------------------------------------|
| 41455  | Other adjustment reactions                                   |
| 42737  | Acute fugue state due to acute stress reaction               |
| 43550  | Combat fatigue                                               |
| 48588  | Adjustment reaction with mixed disturbance of emotion        |
| 56020  | [X]State of emotional shock and stress, unspecified          |
| 56924  | Adjustment reaction with anxious mood                        |
| 58013  | Culture shock                                                |
| 66398  | Adjustment reaction with destructiveness                     |
| 70779  | [X]Combat fatigue                                            |
| 101725 | [X]Chron post-traumatic stress disorder follow military comb |
| 101785 | [X]Acute post-traumatic stress disorder follow military comb |
| 104891 | Adjustment reaction with predominant disturbance conduct NOS |

| icd   | icd_description                                     |
|-------|-----------------------------------------------------|
| F43   | Reaction to severe stress, and adjustment disorders |
| F43.0 | Acute stress reaction                               |
| F43.1 | Post-traumatic stress disorder                      |
| F43.2 | Adjustment disorder                                 |
| F43.8 | Other reactions to severe stress                    |
| F43.9 | Reaction to severe stress, unspecified              |

## Referral to mental health service

| Medcode | Readterm                                                     |
|---------|--------------------------------------------------------------|
| 1690    | Refer to psychologist                                        |
| 2189    | Psychiatric referral                                         |
| 5338    | Referral to psychogeriatrician                               |
| 9868    | Referral to psychiatric nurse                                |
| 10002   | Referral to psychiatrist                                     |
| 10236   | Referral to community mental health team                     |
| 10669   | Referral to psychotherapist                                  |
| 10828   | Referral to mental health counsellor                         |
| 10967   | Refer to psychologist                                        |
| 11270   | Referral to psychologist                                     |
| 11449   | Referral to mental health crisis team                        |
| 11958   | Referral to psychotherapist                                  |
| 12053   | Referral to mental health team                               |
| 12365   | Referral to older age community mental health team           |
| 12447   | Referral to primary care mental health gateway worker        |
| 13677   | Private referral to psychiatrist                             |
| 13703   | Referral to non NHS mental health community service          |
| 18956   | Referral to bereavement counsellor                           |
| 24504   | Refer to mental health worker                                |
| 25950   | Referral to clinical physiologist                            |
| 26178   | Referral to psychosis early intervention service             |
| 27640   | Psychiatric self-referral                                    |
| 28925   | Referral for guided self-help for anxiety                    |
| 30861   | Referral to nurse behavioural therapist                      |
| 32841   | Referral for guided self-help for depression                 |
| 34532   | Private referral to psychogeriatrician                       |
| 34538   | Referral to nurse psychotherapist                            |
| 36728   | Referral to liaison psychiatrist                             |
| 40894   | Referral to psychiatrist for mental handicap                 |
| 41040   | Referral to primary care mental health graduate worker       |
| 41071   | Referral for mental health self-help literature              |
| 41267   | Referral to complementary therapist                          |
| 42932   | Referral to bereavement counsellor                           |
| 44910   | Referral to rehabilitation psychiatrist                      |
| 84212   | Referral to primary care mental health team                  |
| 95163   | Emergency voluntary psychiatric admission Mental Health Act  |
| 95936   | Urgent referral to psychiatrist                              |
| 97420   | Referral to improving access to psychological therapies prog |
| 99630   | Referral for cognitive behavioural therapy                   |
| 105357  | Private referral to psychologist                             |

|        |                                                              |
|--------|--------------------------------------------------------------|
| 102636 | Patient initiated encounter with mental health crisis team   |
| 10308  | Under care of mental health team                             |
| 108558 | Under care of mental health in-reach team                    |
| 32602  | Under care of mental health counsellor                       |
| 11425  | Seen by mental health counsellor                             |
| 105244 | Referral to IAPT (imp acc to psych thera) programme declined |

## Antidepressants

### MAO inhibitors

| Prodcode | Product name                                           |
|----------|--------------------------------------------------------|
| 2883     | Moclobemide 150mg tablets                              |
| 3349     | Nardil 15mg tablets (Archimedes Pharma UK Ltd)         |
| 3356     | Parstelin Tablet (GlaxoSmithKline Consumer Healthcare) |
| 3783     | Tranlycypromine 10mg tablets                           |
| 3955     | Tranlycypromine with trifluoperazine Tablet            |
| 4321     | Phenelzine 15mg tablets                                |
| 5187     | Moclobemide 300mg tablets                              |
| 5832     | Manerix 300mg tablets (Meda Pharmaceuticals Ltd)       |
| 9206     | Manerix 150mg tablets (Meda Pharmaceuticals Ltd)       |
| 10787    | Parnate 10mg Tablet (Goldshield Pharmaceuticals Ltd)   |
| 12207    | Isocarboxazid 10mg tablets                             |
| 12503    | Marplan 10mg Tablet (Cambridge Laboratories Ltd)       |
| 18290    | Marsilid 25mg Tablet (Roche Products Ltd)              |
| 23728    | MARSILID 50 MG TAB                                     |
| 24890    | Trifluoperazine with tranlycypromine 1mg + 10mg Tablet |
| 25945    | Iproniazid 25mg                                        |
| 41654    | Tranlycypromine 10mg tablets (AMCo)                    |
| 41731    | Isocarboxazid 10mg Tablet (Cambridge Laboratories Ltd) |
| 41747    | Moclobemide 150mg tablets (Teva UK Ltd)                |
| 55620    | Flupentixol Liquid                                     |

### SSRIs

| Prodcode | Product name                                       |
|----------|----------------------------------------------------|
| 22       | Fluoxetine 20mg capsules                           |
| 50       | Paroxetine 20mg tablets                            |
| 67       | Citalopram 20mg tablets                            |
| 252      | Prozac 20mg/5ml liquid (Eli Lilly and Company Ltd) |
| 418      | Prozac 20mg capsules (Eli Lilly and Company Ltd)   |
| 476      | Citalopram 10mg tablets                            |
| 488      | Sertraline 50mg tablets                            |
| 513      | Citalopram 40mg/ml oral drops sugar free           |
| 527      | Paroxetine 10mg/5ml oral suspension sugar free     |
| 603      | Escitalopram 10mg tablets                          |
| 648      | Ciprallex 10mg tablets (Lundbeck Ltd)              |
| 727      | Sertraline 100mg tablets                           |
| 785      | Ciprallex 5mg tablets (Lundbeck Ltd)               |
| 815      | Cipramil 40mg/ml drops (Lundbeck Ltd)              |
| 841      | Seroxat 20mg tablets (GlaxoSmithKline UK Ltd)      |
| 1397     | Paroxetine 30mg tablets                            |

|       |                                                                                      |
|-------|--------------------------------------------------------------------------------------|
| 1575  | Seroxat 30mg tablets (GlaxoSmithKline UK Ltd)                                        |
| 1612  | Lustral 50mg tablets (Pfizer Ltd)                                                    |
| 1712  | Cipramil 20mg tablets (Lundbeck Ltd)                                                 |
| 2290  | Fluvoxamine 100mg tablets                                                            |
| 2408  | Cipramil 40mg tablets (Lundbeck Ltd)                                                 |
| 2548  | Fluoxetine 20mg/5ml oral solution                                                    |
| 2880  | Fluvoxamine 50mg tablets                                                             |
| 2897  | Faverin 50mg tablets (BGP Products Ltd)                                              |
| 3391  | Dutonin 100mg tablets (Bristol-Myers Squibb Pharmaceuticals Ltd)                     |
| 3601  | Seroxat 20mg/10ml liquid (GlaxoSmithKline UK Ltd)                                    |
| 3861  | Cipramil 10mg tablets (Lundbeck Ltd)                                                 |
| 4011  | Nefazodone 200mg tablets                                                             |
| 4075  | Fluoxetine 60mg capsules                                                             |
| 4297  | Dutonin 200mg tablets (Bristol-Myers Squibb Pharmaceuticals Ltd)                     |
| 4352  | Lustral 100mg tablets (Pfizer Ltd)                                                   |
| 4554  | Nefazodone 100mg tablets                                                             |
| 4770  | Citalopram 40mg tablets                                                              |
| 4907  | Prozac 60mg capsules (Eli Lilly and Company Ltd)                                     |
| 6218  | Escitalopram 20mg tablets                                                            |
| 6360  | Cipralext 20mg tablets (Lundbeck Ltd)                                                |
| 6405  | Escitalopram 5mg tablets                                                             |
| 7328  | Sertraline 50mg/5ml oral suspension                                                  |
| 9496  | Dutonin tablets treatment initiation pack (Bristol-Myers Squibb Pharmaceuticals Ltd) |
| 12123 | Faverin 100mg tablets (BGP Products Ltd)                                             |
| 14740 | Oxactin 20mg capsules (Discovery Pharmaceuticals Ltd)                                |
| 19183 | Fluoxetine 20mg capsules (A A H Pharmaceuticals Ltd)                                 |
| 19470 | Fluoxetine 20mg capsules (Ranbaxy (UK) Ltd)                                          |
| 20152 | Escitalopram 10mg/ml oral drops sugar free                                           |
| 23334 | FAVERIN                                                                              |
| 26016 | Citalopram 20mg tablets (Sandoz Ltd)                                                 |
| 26056 | Cipralext 10mg/ml oral drops (Lundbeck Ltd)                                          |
| 29756 | Paxoran 20mg Tablet (Ranbaxy (UK) Ltd)                                               |
| 29786 | Ranflutin 20mg capsules (Ranbaxy (UK) Ltd)                                           |
| 30258 | Fluoxetine 20mg/5ml oral solution (Teva UK Ltd)                                      |
| 32401 | Sertraline 50mg tablets (A A H Pharmaceuticals Ltd)                                  |
| 32546 | Paxoran 10mg Tablet (Ranbaxy (UK) Ltd)                                               |
| 32848 | Citalopram 10mg tablets (Actavis UK Ltd)                                             |
| 32899 | Paroxetine 20mg tablets (Actavis UK Ltd)                                             |
| 33071 | Feliciuim 20mg capsules (Opus Pharmaceuticals Ltd)                                   |
| 33410 | Fluoxetine 20mg capsules (Zentiva)                                                   |
| 33720 | Citalopram 10mg tablets (IVAX Pharmaceuticals UK Ltd)                                |
| 33779 | Prozit 20mg/5ml oral solution (Pinewood Healthcare)                                  |
| 33978 | Paroxetine 20mg tablets (Generics (UK) Ltd)                                          |



|       |                                                                 |
|-------|-----------------------------------------------------------------|
| 34202 | Fluoxetine 20mg capsules (Genus Pharmaceuticals Ltd)            |
| 34216 | Fluoxetine 20mg/5ml oral solution (A A H Pharmaceuticals Ltd)   |
| 34288 | Fluoxetine 20mg capsules (Generics (UK) Ltd)                    |
| 34294 | Fluoxetine 20mg capsules (IVAX Pharmaceuticals UK Ltd)          |
| 34351 | Paroxetine 20mg tablets (IVAX Pharmaceuticals UK Ltd)           |
| 34356 | Citalopram 20mg tablets (A A H Pharmaceuticals Ltd)             |
| 34413 | Citalopram 10mg tablets (Zentiva)                               |
| 34415 | Citalopram 20mg tablets (Generics (UK) Ltd)                     |
| 34419 | Paroxetine 20mg tablets (A A H Pharmaceuticals Ltd)             |
| 34436 | Citalopram 10mg tablets (Generics (UK) Ltd)                     |
| 34456 | Fluoxetine 20mg capsules (Teva UK Ltd)                          |
| 34466 | Citalopram 40mg tablets (Sandoz Ltd)                            |
| 34498 | Citalopram 10mg Tablet (Neo Laboratories Ltd)                   |
| 34499 | Citalopram 10mg tablets (Sandoz Ltd)                            |
| 34586 | Citalopram 10mg tablets (A A H Pharmaceuticals Ltd)             |
| 34587 | Paroxetine 30mg tablets (A A H Pharmaceuticals Ltd)             |
| 34603 | Citalopram 40mg tablets (Generics (UK) Ltd)                     |
| 34722 | Citalopram 20mg Tablet (Neo Laboratories Ltd)                   |
| 34822 | Citalopram 20mg tablets (Zentiva)                               |
| 34849 | Fluoxetine 20mg capsules (Tillomed Laboratories Ltd)            |
| 34856 | Fluoxetine 60mg capsules (Generics (UK) Ltd)                    |
| 34871 | Citalopram 20mg tablets (Actavis UK Ltd)                        |
| 34966 | Citalopram 20mg tablets (Teva UK Ltd)                           |
| 34970 | Citalopram 20mg tablets (Niche Generics Ltd)                    |
| 35021 | Paroxetine 10mg tablets                                         |
| 35112 | Seroxat 10mg tablets (GlaxoSmithKline UK Ltd)                   |
| 36746 | Citalopram 40mg tablets (A A H Pharmaceuticals Ltd)             |
| 36893 | Fluoxetine 20mg/5ml oral solution sugar free                    |
| 37256 | Prozep 20mg/5ml oral solution (Chemidex Pharma Ltd)             |
| 38890 | Fluoxetine 20mg Capsule (Milpharm Ltd)                          |
| 40165 | Paroxetine 30mg tablets (Actavis UK Ltd)                        |
| 40726 | Escitalopram 20mg/ml oral drops sugar free                      |
| 40892 | Paroxetine 20mg tablets (Genus Pharmaceuticals Ltd)             |
| 41062 | Ciprallex 20mg/ml oral drops (Lundbeck Ltd)                     |
| 41528 | Citalopram 10mg tablets (Teva UK Ltd)                           |
| 42107 | Fluoxetine 20mg capsules (Niche Generics Ltd)                   |
| 42387 | Sertraline 50mg tablets (Actavis UK Ltd)                        |
| 42499 | Fluoxetine 10mg tablets                                         |
| 42660 | Citalopram 10mg tablets (Almus Pharmaceuticals Ltd)             |
| 42803 | Fluoxetine 20mg/5ml oral solution (IVAX Pharmaceuticals UK Ltd) |
| 43518 | Fluvoxamine 100mg tablets (IVAX Pharmaceuticals UK Ltd)         |
| 43519 | Citalopram 40mg Tablet (Neo Laboratories Ltd)                   |
| 44861 | Fluvoxamine 100mg tablets (Actavis UK Ltd)                      |

|       |                                                                      |
|-------|----------------------------------------------------------------------|
| 44944 | Sertraline 100mg tablets (Teva UK Ltd)                               |
| 45223 | Citalopram 40mg tablets (Niche Generics Ltd)                         |
| 45224 | Fluoxetine 20mg capsules (Sandoz Ltd)                                |
| 45247 | Fluoxetine 20mg capsules (Fannin UK Ltd)                             |
| 45286 | Citalopram 10mg tablets (Niche Generics Ltd)                         |
| 45304 | Citalopram 40mg tablets (Teva UK Ltd)                                |
| 45316 | Fluoxetine 20mg capsules (Wockhardt UK Ltd)                          |
| 45329 | Fluoxetine 20mg capsules (Actavis UK Ltd)                            |
| 45915 | Sertraline 50mg tablets (Almus Pharmaceuticals Ltd)                  |
| 46926 | Citalopram 40mg tablets (Zentiva)                                    |
| 46977 | Citalopram 40mg tablets (Actavis UK Ltd)                             |
| 48026 | Citalopram 20mg tablets (Almus Pharmaceuticals Ltd)                  |
| 48045 | Fluvoxamine 100mg tablets (A A H Pharmaceuticals Ltd)                |
| 48220 | Prozac 20mg capsules (Lexon (UK) Ltd)                                |
| 49165 | Citalopram 10mg tablets (Alliance Healthcare (Distribution) Ltd)     |
| 49519 | Sertraline 100mg/5ml oral suspension                                 |
| 52100 | Citalopram 10mg tablets (Arrow Generics Ltd)                         |
| 52354 | Citalopram 20mg tablets (DE Pharmaceuticals)                         |
| 52408 | Citalopram 10mg tablets (Kent Pharmaceuticals Ltd)                   |
| 52607 | Citalopram 20mg tablets (Bristol Laboratories Ltd)                   |
| 52824 | Citalopram 10mg tablets (PLIVA Pharma Ltd)                           |
| 53394 | Citalopram 20mg tablets (Alliance Healthcare (Distribution) Ltd)     |
| 53787 | Citalopram 10mg tablets (Bristol Laboratories Ltd)                   |
| 54081 | Sertraline 25mg/5ml oral suspension                                  |
| 54826 | Sertraline 150mg/5ml oral suspension                                 |
| 54827 | Citalopram 10mg/5ml oral suspension                                  |
| 54933 | Sertraline 100mg tablets (PLIVA Pharma Ltd)                          |
| 55023 | Paroxetine 20mg tablets (Medreich Plc)                               |
| 55033 | Citalopram 40mg tablets (DE Pharmaceuticals)                         |
| 55146 | Sertraline 100mg tablets (A A H Pharmaceuticals Ltd)                 |
| 55488 | Sertraline 50mg tablets (Teva UK Ltd)                                |
| 55537 | Seroxat 30mg tablets (Lexon (UK) Ltd)                                |
| 56009 | Citalopram 20mg tablets (Arrow Generics Ltd)                         |
| 56292 | Citalopram 40mg/ml oral drops sugar free (Actavis UK Ltd)            |
| 56355 | Citalopram 10mg tablets (Waymade Healthcare Plc)                     |
| 57532 | Prozac 20mg capsules (Waymade Healthcare Plc)                        |
| 57936 | Citalopram 40mg/ml oral drops sugar free (A A H Pharmaceuticals Ltd) |
| 58476 | Citalopram 20mg tablets (Aurobindo Pharma Ltd)                       |
| 58664 | Sertraline 50mg tablets (Generics (UK) Ltd)                          |
| 58723 | Sertraline 50mg tablets (Accord Healthcare Ltd)                      |
| 59193 | Citalopram 10mg tablets (Ranbaxy (UK) Ltd)                           |
| 59288 | Paroxetine 10mg tablets (Actavis UK Ltd)                             |
| 59358 | Fluoxetine 20mg capsules (Milpharm Ltd)                              |

|       |                                                                   |
|-------|-------------------------------------------------------------------|
| 59600 | Sertraline 100mg tablets (Almus Pharmaceuticals Ltd)              |
| 59650 | Citalopram 10mg tablets (Aurobindo Pharma Ltd)                    |
| 60138 | Fluoxetine 20mg orodispersible tablets sugar free                 |
| 60534 | Fluoxetine 20mg dispersible tablets sugar free                    |
| 60568 | Citalopram 20mg tablets (Waymade Healthcare Plc)                  |
| 60619 | Fluoxetine 20mg/5ml oral solution (Kent Pharmaceuticals Ltd)      |
| 60839 | Citalopram 40mg tablets (Almus Pharmaceuticals Ltd)               |
| 60888 | Citalopram 10mg tablets (Sigma Pharmaceuticals Plc)               |
| 60962 | Fluoxetine 20mg capsules (Alliance Healthcare (Distribution) Ltd) |
| 61335 | Prozac 20mg capsules (Mawdsley-Brooks & Company Ltd)              |
| 61503 | Sertraline 100mg tablets (Actavis UK Ltd)                         |
| 62155 | Fluoxetine 20mg capsules (Phoenix Healthcare Distribution Ltd)    |
| 62335 | Olena 20mg dispersible tablets (AMCo)                             |
| 62692 | Sertraline 100mg tablets (Bristol Laboratories Ltd)               |
| 62693 | Sertraline 50mg tablets (Bristol Laboratories Ltd)                |
| 62819 | Sertraline 12.5mg/5ml oral suspension                             |
| 62927 | Sertraline 50mg tablets (Wockhardt UK Ltd)                        |
| 62950 | Sertraline 100mg tablets (Accord Healthcare Ltd)                  |
| 63441 | Citalopram 10mg tablets (Rivopharm (UK) Ltd)                      |
| 63481 | Sertraline 50mg tablets (Aurobindo Pharma Ltd)                    |
| 63827 | Dutonin 50mg tablets (Bristol-Myers Squibb Pharmaceuticals Ltd)   |
| 63916 | Escitalopram 10mg tablets (Actavis UK Ltd)                        |

#### TCAs

| Prodcode | Product name                                                 |
|----------|--------------------------------------------------------------|
| 49       | Amitriptyline 25mg tablets                                   |
| 74       | Dosulepin 75mg tablets                                       |
| 83       | Amitriptyline 10mg tablets                                   |
| 84       | Dosulepin 25mg capsules                                      |
| 114      | Lofepamine 70mg tablets                                      |
| 182      | Tryptizol 10mg/ml Injection (Merck Sharp & Dohme Ltd)        |
| 487      | Amitriptyline 25mg modified-release capsules                 |
| 595      | Amitriptyline 25mg / Perphenazine 2mg tablets                |
| 873      | AMITRIPTYLINE 100 MG TAB                                     |
| 1169     | Prothiaden 25mg capsules (Teofarma)                          |
| 1208     | Triptafen tablets (AMCo)                                     |
| 1310     | Imipramine 10mg tablets                                      |
| 1453     | Triptafen m 2mg+10mg Tablet (Goldshield Pharmaceuticals Ltd) |
| 1730     | Trazodone 100mg capsules                                     |
| 1809     | Imipramine 25mg tablets                                      |
| 1888     | Amitriptyline 50mg tablets                                   |
| 1940     | Dothapax 25 capsules (Ashbourne Pharmaceuticals Ltd)         |

|      |                                                           |
|------|-----------------------------------------------------------|
| 2039 | Trimipramine 25mg tablets                                 |
| 2093 | Gamanil 70mg tablets (Merck Serono Ltd)                   |
| 2320 | Prothiaden 75mg tablets (Teofarma)                        |
| 2486 | Lentizol 25mg modified-release capsules (Pfizer Ltd)      |
| 2525 | Amitriptyline 75mg modified-release capsules              |
| 2531 | Surmontil 50mg capsules (Sanofi)                          |
| 2532 | Surmontil 25mg tablets (Sanofi)                           |
| 2533 | TRIMIPRAMINE 50 MG TAB                                    |
| 2579 | Tofranil 10mg Tablet (Novartis Pharmaceuticals UK Ltd)    |
| 2936 | Motival 10mg/500microgram tablets (Sanofi)                |
| 2985 | Lentizol 50mg modified-release capsules (Pfizer Ltd)      |
| 3083 | Mianserin 10mg tablets                                    |
| 3183 | Nortriptyline 10mg tablets                                |
| 3194 | Clomipramine 10mg capsules                                |
| 3195 | CLOMIPRAMINE 25 MG TAB                                    |
| 3196 | Trimipramine 50mg capsules                                |
| 3351 | Amoxapine 50mg tablets                                    |
| 3355 | Trazodone 50mg capsules                                   |
| 3490 | Amitriptyline 10mg / Perphenazine 2mg tablets             |
| 3554 | Doxepin 25mg capsules                                     |
| 3652 | Amoxapine 100mg tablets                                   |
| 3657 | Anafranil 25mg capsules (Novartis Pharmaceuticals UK Ltd) |
| 3668 | IMIPRAMINE 100 MG TAB                                     |
| 3670 | Clomipramine 25mg capsules                                |
| 3771 | AMITRIPTYLINE 75 MG TAB                                   |
| 3777 | Amitriptyline 10mg/5ml sugar free oral solution           |
| 3842 | Doxepin 10mg capsules                                     |
| 3903 | Nortriptyline 25mg tablets                                |
| 3925 | Clomipramine 50mg capsules                                |
| 4003 | Molipaxin 150mg tablets (Zentiva)                         |
| 4020 | Trazodone 150mg tablets                                   |
| 4118 | Nortriptyline 10mg Capsule                                |
| 4149 | PROTRIPTYLINE HCl 10 MG TAB                               |
| 4194 | Molipaxin 100mg capsules (Zentiva)                        |
| 4218 | Lofepamine 70mg/5ml oral suspension sugar free            |
| 4310 | Trimipramine 10mg tablets                                 |
| 4329 | Mianserin 20mg tablets                                    |
| 4411 | Amoxapine 150mg tablets                                   |
| 4682 | Amitriptyline 50mg modified-release capsules              |
| 4690 | Amitriptyline 50mg/5ml oral solution sugar free           |
| 4874 | Molipaxin 50mg capsules (Zentiva)                         |
| 5073 | Doxepin 50mg capsules                                     |
| 6054 | Dosulepin 25mg/5ml oral solution sugar free               |

|       |                                                                         |
|-------|-------------------------------------------------------------------------|
| 6255  | Mianserin 30mg tablets                                                  |
| 6312  | Amitriptyline 25mg/5ml oral solution sugar free                         |
| 6442  | Trazodone 50mg/5ml oral solution sugar free                             |
| 6894  | Perphenazine 2mg with Amitriptyline 25mg tablet                         |
| 7059  | Doxepin 75mg capsules                                                   |
| 7468  | Bolvidon 10mg Tablet (Organon Laboratories Ltd)                         |
| 7475  | AMOXAPINE 25 MG TAB                                                     |
| 7515  | Anafranil 10mg capsules (Novartis Pharmaceuticals UK Ltd)               |
| 7573  | IMIPRAMINE 25 MG CAP                                                    |
| 7677  | Allegron 10mg tablets (King Pharmaceuticals Ltd)                        |
| 7678  | Nortriptyline 25mg Capsule                                              |
| 7693  | Anafranil 50mg capsules (Novartis Pharmaceuticals UK Ltd)               |
| 7751  | Tryptizol 25mg Tablet (Merck Sharp & Dohme Ltd)                         |
| 7755  | Concordin 10 Tablet (Merck Sharp & Dohme Ltd)                           |
| 7756  | Protriptyline 5mg tablet                                                |
| 7780  | Nortriptyline 10mg / Fluphenazine 500microgram tablets                  |
| 7784  | IMIPRAMINE 50 MG TAB                                                    |
| 7816  | Concordin 5 Tablet (Merck Sharp & Dohme Ltd)                            |
| 7894  | Anafranil SR 75mg tablets (Novartis Pharmaceuticals UK Ltd)             |
| 7910  | Tofranil 25mg tablets (Novartis Pharmaceuticals UK Ltd)                 |
| 7979  | Pertofran 25mg Tablet (Novartis Pharmaceuticals UK Ltd)                 |
| 7981  | Desipramine 25mg tablets                                                |
| 8055  | Imipramine 25mg/5ml oral solution                                       |
| 8144  | Bolvidon 20mg Tablet (Organon Laboratories Ltd)                         |
| 8174  | Molipaxin 50mg/5ml oral liquid (Sanofi)                                 |
| 8250  | AMITRIPTYLINE S/F 25 MG/5ML SYR                                         |
| 8332  | Tryptizol 50mg Tablet (Merck Sharp & Dohme Ltd)                         |
| 8493  | Motipress tablets (Sanofi-Synthelabo Ltd)                               |
| 8585  | Bolvidon 30mg Tablet (Organon Laboratories Ltd)                         |
| 8640  | Allegron 25mg tablets (King Pharmaceuticals Ltd)                        |
| 8661  | Clomipramine 75mg modified-release tablets                              |
| 8719  | Anafranil 25mg/5ml syrup (Novartis Pharmaceuticals UK Ltd)              |
| 8720  | Clomipramine 25mg/5ml oral solution                                     |
| 8726  | Tryptizol 10mg Tablet (Merck Sharp & Dohme Ltd)                         |
| 8826  | TOFRANIL 50 MG TAB                                                      |
| 8831  | Tryptizol mr 75mg Modified-release capsule (Merck Sharp & Dohme Ltd)    |
| 8878  | Tryptizol 10mg/5ml sugar free Oral solution (Merck Sharp and Dohme Ltd) |
| 8928  | Surmontil 10mg tablets (Sanofi)                                         |
| 10413 | Sinequan 10mg capsules (Pfizer Ltd)                                     |
| 10649 | IMIPRAMINE 75 MG TAB                                                    |
| 10948 | Dosulepin 75mg/5ml oral solution sugar free                             |
| 11187 | Protriptyline 10mg tablet                                               |
| 11956 | Norval 20mg Tablet (Bencard)                                            |

|       |                                                                     |
|-------|---------------------------------------------------------------------|
| 11963 | Limbitrol 10 Capsule (Roche Products Ltd)                           |
| 12111 | Vivalan 50mg Tablet (AstraZeneca UK Ltd)                            |
| 12125 | Sinequan 50mg capsules (Pfizer Ltd)                                 |
| 12129 | Sinequan 25mg capsules (Pfizer Ltd)                                 |
| 12192 | Norval 30mg Tablet (Bencard)                                        |
| 12194 | NORTRIPTYLINE 10 MG ELI                                             |
| 12227 | Butriptyline 25mg tablets                                           |
| 12309 | Viloxazine hcl 50mg tablets                                         |
| 12353 | Aventyl 25mg Capsule (Eli Lilly and Company Ltd)                    |
| 12368 | Norval 10mg Tablet (Bencard)                                        |
| 12549 | Aventyl 10mg/5ml Liquid (Eli Lilly and Company Ltd)                 |
| 12710 | Trazodone 150mg modified-release tablets                            |
| 13318 | ANAFRANIL 25 MG INJ                                                 |
| 13496 | AMITRIPTYLINE 200 MG TAB                                            |
| 13621 | Molipaxin CR 150mg tablets (Aventis Pharma)                         |
| 14398 | Asendis 50mg Tablet (Wyeth Pharmaceuticals)                         |
| 14519 | Sinequan 75mg capsules (Pfizer Ltd)                                 |
| 14521 | SINEQUAN 15 MG TAB                                                  |
| 14534 | Limbitrol 5 Capsule (Roche Products Ltd)                            |
| 14578 | Nortriptyline 30mg / Fluphenazine 1.5mg tablets                     |
| 15380 | Asendis 25mg Tablet (Wyeth Pharmaceuticals)                         |
| 15632 | Dothapax 75 tablets (Ashbourne Pharmaceuticals Ltd)                 |
| 16323 | Perphenazine 2mg with Amitriptyline 10mg tablet                     |
| 17183 | Aventyl 10mg Capsule (Eli Lilly and Company Ltd)                    |
| 17319 | Amoxapine 25mg tablets                                              |
| 18342 | Amitriptyline 25mg / Chlordiazepoxide 10mg capsules                 |
| 18932 | Evadyne 25mg Tablet (Wyeth Pharmaceuticals)                         |
| 19168 | Dosulepin 25mg/5ml mixture                                          |
| 19181 | Trazodone 100mg capsules (Generics (UK) Ltd)                        |
| 19186 | Dosulepin 75mg tablets (Actavis UK Ltd)                             |
| 19779 | Amitriptyline 10mg/ml injection                                     |
| 20026 | Domical 25mg Tablet (Berk Pharmaceuticals Ltd)                      |
| 20061 | PERPHENAZINE 8 MG TAB                                               |
| 20571 | Fluphenazine with nortriptyline 500microgramswith10mg Tablet        |
| 20712 | AMITRIPTYLINE S/R                                                   |
| 20715 | LIMBITROL 5                                                         |
| 21081 | Amitriptyline 12.5mg / Chlordiazepoxide 5mg capsules                |
| 21157 | Thaden 75mg tablets (Opus Pharmaceuticals Ltd)                      |
| 21357 | Asendis 100mg Tablet (Wyeth Pharmaceuticals)                        |
| 21819 | Prepadine 75mg tablets (Teva UK Ltd)                                |
| 21820 | Prepadine 25mg capsules (Teva UK Ltd)                               |
| 22006 | TRYPTIZOL                                                           |
| 22070 | Amitriptyline 10mg/5ml Oral solution (Rosemont Pharmaceuticals Ltd) |

|       |                                                                                      |
|-------|--------------------------------------------------------------------------------------|
| 22872 | DOXEPIN HCL                                                                          |
| 23426 | Dosulepin 25mg capsules (A A H Pharmaceuticals Ltd)                                  |
| 23497 | AMITRIPTYLINE 300 MG TAB                                                             |
| 24134 | Amitriptyline 25mg tablets (Kent Pharmaceuticals Ltd)                                |
| 24141 | Amitriptyline 10mg tablets (Actavis UK Ltd)                                          |
| 24145 | Amitriptyline 25mg tablets (Actavis UK Ltd)                                          |
| 24147 | Amitriptyline 25mg tablets (Teva UK Ltd)                                             |
| 24152 | Amitriptyline 10mg tablets (Teva UK Ltd)                                             |
| 24680 | Elavil 10mg Tablet (DDSA Pharmaceuticals Ltd)                                        |
| 24700 | Prondol 15mg Tablet (Wyeth Pharmaceuticals)                                          |
| 24723 | Asendis 150mg Tablet (Wyeth Pharmaceuticals)                                         |
| 25036 | CLOMIPRAMINE HYDROCHLORIDE                                                           |
| 25045 | TRIMIPRAMINE                                                                         |
| 25070 | LOFEPRAMINE                                                                          |
| 25085 | TRIMIPRAMINE                                                                         |
| 25444 | Lomont 70mg/5ml oral suspension (Rosemont Pharmaceuticals Ltd)                       |
| 26213 | Domical 10mg Tablet (Berk Pharmaceuticals Ltd)                                       |
| 26715 | BOLVIDON 60 MG TAB                                                                   |
| 26822 | PROTHIADEN                                                                           |
| 27008 | Domical 50mg Tablet (Berk Pharmaceuticals Ltd)                                       |
| 27476 | Iprindole hc 15mg                                                                    |
| 27568 | SURMONTIL                                                                            |
| 27616 | PROTHIADEN                                                                           |
| 27733 | Iprindole hc 30mg                                                                    |
| 27876 | AMITRIPTYLINE                                                                        |
| 29339 | Trazodone 50mg capsules (Generics (UK) Ltd)                                          |
| 29857 | Trazodone 150mg tablets (Teva UK Ltd)                                                |
| 29875 | Dosulepin 25mg capsules (Generics (UK) Ltd)                                          |
| 30375 | Anafranil 25mg/2ml solution for injection ampoules (Novartis Pharmaceuticals UK Ltd) |
| 30376 | Thaden 25mg capsules (Opus Pharmaceuticals Ltd)                                      |
| 30738 | AMITRIPTYLINE S/F                                                                    |
| 30983 | Trazodone 150mg tablets (Generics (UK) Ltd)                                          |
| 31672 | Prondol 30mg Tablet (Wyeth Pharmaceuticals)                                          |
| 31824 | Dosulepin 25mg capsules (IVAX Pharmaceuticals UK Ltd)                                |
| 31826 | Dosulepin 75mg tablets (IVAX Pharmaceuticals UK Ltd)                                 |
| 32121 | Dosulepin 75mg tablets (A A H Pharmaceuticals Ltd)                                   |
| 32439 | Amitriptyline 25mg Tablet (Sussex Pharmaceutical Ltd)                                |
| 32457 | Butriptyline 50mg tablets                                                            |
| 32863 | Imipramine 10mg tablets (Teva UK Ltd)                                                |
| 33074 | Praminil 10mg Tablet (DDSA Pharmaceuticals Ltd)                                      |
| 33090 | Amitriptyline 10mg tablets (A A H Pharmaceuticals Ltd)                               |
| 33164 | Dosulepin 25mg capsules (Sandoz Ltd)                                                 |
| 33624 | Amitriptyline 50mg tablets (Teva UK Ltd)                                             |

|       |                                                                                |
|-------|--------------------------------------------------------------------------------|
| 34003 | Trazodone 50mg capsules (A A H Pharmaceuticals Ltd)                            |
| 34046 | Lofepamine 70mg tablets (A A H Pharmaceuticals Ltd)                            |
| 34058 | Dosulepin 75mg tablets (Teva UK Ltd)                                           |
| 34107 | Amitriptyline 50mg tablets (Wockhardt UK Ltd)                                  |
| 34129 | Amitriptyline 25mg tablets (Wockhardt UK Ltd)                                  |
| 34182 | Amitriptyline 50mg tablets (Kent Pharmaceuticals Ltd)                          |
| 34197 | Amitriptyline 25mg Tablet (Berk Pharmaceuticals Ltd)                           |
| 34222 | Imipramine 10mg tablets (Actavis UK Ltd)                                       |
| 34223 | Dosulepin 25mg capsules (Teva UK Ltd)                                          |
| 34224 | Amitriptyline 25mg/5ml oral solution sugar free (Rosemont Pharmaceuticals Ltd) |
| 34245 | Clomipramine 25mg capsules (A A H Pharmaceuticals Ltd)                         |
| 34251 | Amitriptyline 50mg/5ml oral solution sugar free (Rosemont Pharmaceuticals Ltd) |
| 34274 | Amitriptyline 50mg tablets (A A H Pharmaceuticals Ltd)                         |
| 34355 | Imipramine 25mg tablets (Actavis UK Ltd)                                       |
| 34401 | Amitriptyline 10mg tablets (Wockhardt UK Ltd)                                  |
| 34421 | Trazodone 50mg capsules (Zentiva)                                              |
| 34470 | Trazodone 150mg tablets (Zentiva)                                              |
| 34474 | Amitriptyline 25mg Tablet (Regent Laboratories Ltd)                            |
| 34503 | Amitriptyline 25mg tablets (IVAX Pharmaceuticals UK Ltd)                       |
| 34525 | Dosulepin 75mg tablets (Generics (UK) Ltd)                                     |
| 34578 | Lofepamine 70mg tablets (IVAX Pharmaceuticals UK Ltd)                          |
| 34580 | Trazodone 100mg capsules (A A H Pharmaceuticals Ltd)                           |
| 34634 | Amitriptyline 50mg tablets (Actavis UK Ltd)                                    |
| 34641 | Dosulepin 25mg capsules (Sovereign Medical Ltd)                                |
| 34643 | Dosulepin 25mg capsules (Almus Pharmaceuticals Ltd)                            |
| 34672 | Lofepamine 70mg tablets (Sterwin Medicines)                                    |
| 34731 | Amitriptyline 10mg tablets (Kent Pharmaceuticals Ltd)                          |
| 34745 | Dosulepin 25mg capsules (Actavis UK Ltd)                                       |
| 34782 | Amitriptyline 25mg tablets (A A H Pharmaceuticals Ltd)                         |
| 34813 | Imipramine 25mg tablets (A A H Pharmaceuticals Ltd)                            |
| 34866 | Clomipramine 10mg capsules (A A H Pharmaceuticals Ltd)                         |
| 34872 | Imipramine 25mg Tablet (C P Pharmaceuticals Ltd)                               |
| 34916 | Amitriptyline 10mg Tablet (Berk Pharmaceuticals Ltd)                           |
| 34950 | Lofepamine 70mg tablets (Actavis UK Ltd)                                       |
| 35258 | Sinepin 25mg capsules (Marlborough Pharmaceuticals Ltd)                        |
| 35493 | Sinepin 50mg capsules (Marlborough Pharmaceuticals Ltd)                        |
| 38274 | Clomipramine 50mg/5ml oral suspension                                          |
| 38827 | Triptafen-M tablets (Mercury Pharma Group Ltd)                                 |
| 39145 | Nortriptyline 10mg/5ml Liquid                                                  |
| 40396 | Amitriptyline 50mg Tablet (Berk Pharmaceuticals Ltd)                           |
| 40777 | Doxepin 25mg/5ml oral suspension                                               |
| 41408 | Imipramine 25mg tablets (Teva UK Ltd)                                          |
| 41563 | Clomipramine 25mg capsules (IVAX Pharmaceuticals UK Ltd)                       |



|       |                                                                     |
|-------|---------------------------------------------------------------------|
| 41597 | Clomipramine 50mg capsules (IVAX Pharmaceuticals UK Ltd)            |
| 41609 | Trazodone 50mg capsules (Teva UK Ltd)                               |
| 41627 | Lofepramine 70mg Tablet (Teva UK Ltd)                               |
| 41628 | Clomipramine 10mg capsules (IVAX Pharmaceuticals UK Ltd)            |
| 41681 | Imipramine 10mg tablets (A A H Pharmaceuticals Ltd)                 |
| 41709 | Trazodone 100mg capsules (Teva UK Ltd)                              |
| 41710 | Trazodone 100mg capsules (Zentiva)                                  |
| 41729 | Amitriptyline 25mg Tablet (Celltech Pharma Europe Ltd)              |
| 42078 | Amitriptyline 25mg tablets (Almus Pharmaceuticals Ltd)              |
| 42228 | Trimipramine 10mg tablets (A A H Pharmaceuticals Ltd)               |
| 42247 | Imipramine 25mg/5ml oral solution sugar free                        |
| 42394 | Amitriptyline 25mg Tablet (Crosspharma Ltd)                         |
| 42734 | Dosulepin 75mg tablets (Almus Pharmaceuticals Ltd)                  |
| 43024 | Dosulepin 100mg/5ml oral solution                                   |
| 43534 | Lofepramine 70mg/5ml Oral suspension (Rosemont Pharmaceuticals Ltd) |
| 43561 | Clomipramine 10mg capsules (Teva UK Ltd)                            |
| 44853 | Dosulepin 25mg capsules (Kent Pharmaceuticals Ltd)                  |
| 45226 | Trimipramine 25mg tablets (A A H Pharmaceuticals Ltd)               |
| 45233 | Amitriptyline 10mg tablets (IVAX Pharmaceuticals UK Ltd)            |
| 45242 | Amitriptyline 10mg Tablet (Sussex Pharmaceutical Ltd)               |
| 45318 | Clomipramine 50mg capsules (A A H Pharmaceuticals Ltd)              |
| 45350 | Clomipramine 25mg capsules (Teva UK Ltd)                            |
| 45737 | Dosulepin 25mg/5ml Oral solution (Rosemont Pharmaceuticals Ltd)     |
| 46801 | Amitriptyline 10mg/5ml oral solution                                |
| 46818 | Amitriptyline 10mg/5ml oral suspension                              |
| 46970 | Amitriptyline 50mg tablets (IVAX Pharmaceuticals UK Ltd)            |
| 47363 | Mianserin 20mg Tablet (Berk Pharmaceuticals Ltd)                    |
| 48065 | Amitriptyline oral solution                                         |
| 48216 | Nortriptyline 25mg tablets (A A H Pharmaceuticals Ltd)              |
| 50722 | Dosulepin 25mg/5ml oral solution                                    |
| 51758 | Prothiaden 25mg capsules (Stephar (U.K.) Ltd)                       |
| 52867 | Amitriptyline 10mg tablets (Accord Healthcare Ltd)                  |
| 53161 | Clomipramine 50mg/5ml oral solution                                 |
| 53187 | Clomipramine 50mg capsules (Kent Pharmaceuticals Ltd)               |
| 53808 | Trimipramine 10mg tablets (Phoenix Healthcare Distribution Ltd)     |
| 54877 | Amitriptyline 25mg tablets (Accord Healthcare Ltd)                  |
| 55137 | Trazodone 150mg/5ml oral suspension                                 |
| 55138 | Trazodone 250mg/5ml oral solution                                   |
| 55139 | Amitriptyline 25mg tablets (Alliance Healthcare (Distribution) Ltd) |
| 55289 | Asendis 50mg tablets (Mercury Pharma Group Ltd)                     |
| 55491 | Amitriptyline 10mg tablets (Almus Pharmaceuticals Ltd)              |
| 55970 | Nortriptyline 10mg tablets (King Pharmaceuticals Ltd)               |
| 56229 | Lofepramine 70mg/5ml oral solution                                  |

|       |                                                                         |
|-------|-------------------------------------------------------------------------|
| 56501 | Tofranil 25mg tablets (Lexon (UK) Ltd)                                  |
| 56703 | Lofepamine 70mg tablets (Sandoz Ltd)                                    |
| 57107 | Amitriptyline 10mg tablets (Phoenix Healthcare Distribution Ltd)        |
| 57226 | Trazodone 25mg/5ml oral suspension                                      |
| 57926 | Dosulepin 75mg/5ml oral solution                                        |
| 57972 | Amitriptyline 10mg tablets (Alliance Healthcare (Distribution) Ltd)     |
| 57978 | Trimipramine 25mg tablets (Waymade Healthcare Plc)                      |
| 58450 | Fefrapax 70mg tablets (Ashbourne Pharmaceuticals Ltd)                   |
| 59161 | Amitriptyline 10mg tablets (Waymade Healthcare Plc)                     |
| 59820 | Amitriptyline 50mg/5ml oral solution sugar free (Wockhardt UK Ltd)      |
| 59931 | Trazodone 50mg/5ml oral solution sugar free (A A H Pharmaceuticals Ltd) |
| 60355 | Amitriptyline 25mg tablets (Phoenix Healthcare Distribution Ltd)        |
| 60410 | Amitriptyline 25mg/5ml oral solution sugar free (Wockhardt UK Ltd)      |
| 60591 | Lofepamine 70mg tablets (Teva UK Ltd)                                   |
| 60929 | Protriptyline 5mg tablets                                               |
| 61657 | Trazodone 75mg/5ml oral solution                                        |
| 61835 | Amitriptyline 10mg tablets (DE Pharmaceuticals)                         |
| 61842 | Trazodone 50mg/5ml oral solution                                        |
| 62620 | Clomipramine 10mg capsules (Generics (UK) Ltd)                          |
| 62681 | Dosulepin 75mg tablets (Sandoz Ltd)                                     |
| 63276 | Nortriptyline 25mg tablets (Alliance Healthcare (Distribution) Ltd)     |

### **Other**

| <b>Prodcode</b> | <b>Product name</b>                            |
|-----------------|------------------------------------------------|
| 301             | Venlafaxine 37.5mg tablets                     |
| 470             | Venlafaxine 75mg modified-release capsules     |
| 600             | Flupentixol 1mg tablets                        |
| 623             | Efexor 37.5mg tablets (Wyeth Pharmaceuticals)  |
| 742             | Mirtazapine 30mg tablets                       |
| 1222            | Venlafaxine 75mg tablets                       |
| 1474            | Efexor XL 75mg capsules (Pfizer Ltd)           |
| 2275            | Flupentixol 500microgram tablets               |
| 2356            | Reboxetine 4mg tablets                         |
| 2617            | Venlafaxine 50mg tablets                       |
| 2654            | Venlafaxine 150mg modified-release capsules    |
| 3353            | L-TRYPTOPHAN 500 MG CAP                        |
| 3951            | Fluanxol 1mg tablets (Lundbeck Ltd)            |
| 3953            | Fluanxol 500microgram tablets (Lundbeck Ltd)   |
| 3954            | OPTIMAX TAB                                    |
| 4422            | Tryptophan 500mg tablets                       |
| 4726            | Zispin 30mg tablets (Organon Laboratories Ltd) |
| 5611            | Optimax 500mg tablets (Merck Serono Ltd)       |

|       |                                                                     |
|-------|---------------------------------------------------------------------|
| 5710  | Efexor XL 150mg capsules (Pfizer Ltd)                               |
| 6274  | Efexor 50mg tablets (Wyeth Pharmaceuticals)                         |
| 6421  | Mirtazapine 15mg orodispersible tablets                             |
| 6481  | Mirtazapine 45mg orodispersible tablets                             |
| 6488  | Mirtazapine 30mg orodispersible tablets                             |
| 6795  | Mirtazapine 15mg tablets                                            |
| 6846  | Zispin SolTab 15mg orodispersible tablets (Merck Sharp & Dohme Ltd) |
| 6854  | Mirtazapine 45mg tablets                                            |
| 6895  | Duloxetine 60mg gastro-resistant capsules                           |
| 7122  | Duloxetine 30mg gastro-resistant capsules                           |
| 8844  | Tryptophan with ascorbic acid and pyridoxine powder                 |
| 8845  | OPTIMAX 6 GM POW                                                    |
| 9182  | Efexor 75mg tablets (Wyeth Pharmaceuticals)                         |
| 9534  | Nefazodone Starter pack                                             |
| 10083 | Zispin SolTab 30mg orodispersible tablets (Merck Sharp & Dohme Ltd) |
| 12221 | Pacitron 500mg Tablet (Rorer Pharmaceuticals Ltd)                   |
| 13151 | Cymbalta 30mg gastro-resistant capsules (Eli Lilly and Company Ltd) |
| 13237 | Venlafaxine 37.5mg/5ml oral suspension                              |
| 14849 | Cymbalta 60mg gastro-resistant capsules (Eli Lilly and Company Ltd) |
| 15163 | Edronax 4mg tablets (Pfizer Ltd)                                    |
| 15268 | Zispin SolTab 45mg orodispersible tablets (Merck Sharp & Dohme Ltd) |
| 16154 | Mirtazapine 15mg/ml oral solution sugar free                        |
| 20504 | Optimax wv Tablet (E. Merck)                                        |
| 27565 | FLUANXOL                                                            |
| 31168 | MIRTAZAPINE                                                         |
| 33337 | Mirtazapine 45mg tablets (A A H Pharmaceuticals Ltd)                |
| 39359 | Venlafaxine 75mg modified-release tablets                           |
| 39360 | Venlafaxine 150mg modified-release tablets                          |
| 39770 | Tifaxin XL 75mg capsules (Genus Pharmaceuticals Ltd)                |
| 39809 | Tifaxin XL 150mg capsules (Genus Pharmaceuticals Ltd)               |
| 40048 | ViePax XL 75mg tablets (Dexcel-Pharma Ltd)                          |
| 40049 | ViePax XL 150mg tablets (Dexcel-Pharma Ltd)                         |
| 40054 | Venlafaxine 225mg modified-release tablets                          |
| 40059 | Venlalic XL 75mg tablets (DB Ashbourne Ltd)                         |
| 40062 | Venlalic XL 150mg tablets (DB Ashbourne Ltd)                        |
| 40092 | Vensir XL 150mg capsules (Morningside Healthcare Ltd)               |
| 40160 | Mirtazapine 30mg tablets (Actavis UK Ltd)                           |
| 40277 | Vensir XL 75mg capsules (Morningside Healthcare Ltd)                |
| 40295 | Valdoxan 25mg tablets (Servier Laboratories Ltd)                    |
| 40407 | Venlalic XL 225mg tablets (DB Ashbourne Ltd)                        |
| 40494 | Agomelatine 25mg tablets                                            |
| 40514 | Venaxx XL 150mg capsules (AMCo)                                     |
| 40515 | Venaxx XL 75mg capsules (AMCo)                                      |

|       |                                                                             |
|-------|-----------------------------------------------------------------------------|
| 40517 | Vexarin XL 150mg capsules (Generics (UK) Ltd)                               |
| 40764 | ViePax 37.5mg tablets (Dexcel-Pharma Ltd)                                   |
| 40815 | Tardcaps XL 75mg capsules (IXL Pharma Ltd)                                  |
| 40817 | Tardcaps XL 150mg capsules (IXL Pharma Ltd)                                 |
| 40917 | ViePax 75mg tablets (Dexcel-Pharma Ltd)                                     |
| 41033 | Rodomel XL 75mg capsules (Teva UK Ltd)                                      |
| 41299 | Politid XL 75mg capsules (Actavis UK Ltd)                                   |
| 41314 | Rodomel XL 150mg capsules (Teva UK Ltd)                                     |
| 42600 | Vexarin XL 75mg capsules (Generics (UK) Ltd)                                |
| 43203 | Venlafaxine 75mg modified-release capsules (Sandoz Ltd)                     |
| 43234 | Mirtazapine 45mg orodispersible tablets (Teva UK Ltd)                       |
| 43235 | Mirtazapine 45mg orodispersible tablets (A A H Pharmaceuticals Ltd)         |
| 43236 | Mirtazapine 45mg orodispersible tablets (Actavis UK Ltd)                    |
| 43237 | Mirtazapine 15mg orodispersible tablets (Teva UK Ltd)                       |
| 43239 | Mirtazapine 15mg tablets (A A H Pharmaceuticals Ltd)                        |
| 43241 | Mirtazapine 15mg orodispersible tablets (Aurobindo Pharma Ltd)              |
| 43242 | Mirtazapine 15mg tablets (Genus Pharmaceuticals Ltd)                        |
| 43246 | Mirtazapine 15mg orodispersible tablets (Genus Pharmaceuticals Ltd)         |
| 43247 | Mirtazapine 45mg orodispersible tablets (Genus Pharmaceuticals Ltd)         |
| 43248 | Mirtazapine 15mg orodispersible tablets (Focus Pharmaceuticals Ltd)         |
| 43250 | Mirtazapine 30mg orodispersible tablets (A A H Pharmaceuticals Ltd)         |
| 43253 | Mirtazapine 15mg orodispersible tablets (A A H Pharmaceuticals Ltd)         |
| 43256 | Mirtazapine 45mg orodispersible tablets (Focus Pharmaceuticals Ltd)         |
| 43257 | Mirtazapine 15mg tablets (Teva UK Ltd)                                      |
| 43334 | Venlafaxine 150mg modified-release capsules (Sandoz Ltd)                    |
| 43673 | Politid XL 150mg capsules (Actavis UK Ltd)                                  |
| 43968 | Foraven XL 75mg capsules (Forum Products Ltd)                               |
| 44936 | Venlaneo XL 150mg capsules (Kent Pharmaceuticals Ltd)                       |
| 44937 | Venlaneo XL 75mg capsules (Kent Pharmaceuticals Ltd)                        |
| 45664 | Depefex XL 150mg capsules (Chiesi Ltd)                                      |
| 45806 | Venlafaxine 37.5mg modified-release tablets                                 |
| 45818 | Venlalic XL 37.5mg tablets (DB Ashbourne Ltd)                               |
| 45959 | Depefex XL 75mg capsules (Chiesi Ltd)                                       |
| 46668 | Mirtazapine 15mg tablets (Arrow Generics Ltd)                               |
| 47945 | Mirtazapine 30mg tablets (A A H Pharmaceuticals Ltd)                        |
| 47966 | Mirtazapine 15mg/ml oral solution sugar free (Rosemont Pharmaceuticals Ltd) |
| 48185 | Mirtazapine 30mg orodispersible tablets (Almus Pharmaceuticals Ltd)         |
| 48199 | Ranfaxine XL 75mg capsules (Ranbaxy (UK) Ltd)                               |
| 48698 | Mirtazapine 15mg orodispersible tablets sugar free                          |
| 49511 | Venlablue XL 75mg capsules (Bluefish Pharmaceuticals AB)                    |
| 49820 | Mirtazapine 45mg orodispersible tablets sugar free                          |
| 50081 | Venlablue XL 150mg capsules (Bluefish Pharmaceuticals AB)                   |
| 50592 | Fluanxol 1mg tablets (Sigma Pharmaceuticals Plc)                            |

|       |                                                                               |
|-------|-------------------------------------------------------------------------------|
| 50892 | Zispin SolTab 15mg orodispersible tablets (Necessity Supplies Ltd)            |
| 50934 | Venlafaxine 150mg/5ml oral solution                                           |
| 51280 | Efexor XL 150mg capsules (Waymade Healthcare Plc)                             |
| 51361 | Venlafaxine 37.5mg tablets (Ranbaxy (UK) Ltd)                                 |
| 51383 | Duloxetine 60mg gastro-resistant capsules (Sigma Pharmaceuticals Plc)         |
| 51699 | Venlafaxine 37.5mg/5ml oral solution                                          |
| 52074 | Alventa XL 75mg capsules (Consilient Health Ltd)                              |
| 52516 | Alventa XL 150mg capsules (Consilient Health Ltd)                             |
| 52716 | Tonpular XL 75mg capsules (Wockhardt UK Ltd)                                  |
| 53321 | Mirtazapine 15mg/ml oral solution sugar free (A A H Pharmaceuticals Ltd)      |
| 53326 | Venlafaxine 75mg/5ml oral solution                                            |
| 53543 | Zispin SolTab 30mg orodispersible tablets (Necessity Supplies Ltd)            |
| 53648 | Mirtazapine 30mg orodispersible tablets (Actavis UK Ltd)                      |
| 53699 | Mirtazapine 15mg tablets (Actavis UK Ltd)                                     |
| 54012 | Mirtazapine 15mg orodispersible tablets sugar free (Sandoz Ltd)               |
| 54342 | Mirtazapine 15mg tablets (Medreich Plc)                                       |
| 54644 | Mirtazapine 15mg tablets (Pfizer Ltd)                                         |
| 54686 | Tryptophan 500mg capsules                                                     |
| 54747 | Optimax 500mg capsules (Merck Serono Ltd)                                     |
| 54792 | Mirtazapine 30mg tablets (Alliance Healthcare (Distribution) Ltd)             |
| 55424 | Venlafaxine                                                                   |
| 55482 | Mirtazapine 15mg orodispersible tablets (Generics (UK) Ltd)                   |
| 55501 | Venlafaxine 150mg Modified-release capsule (Hillcross Pharmaceuticals Ltd)    |
| 56209 | Mirtazapine 30mg tablets (Phoenix Healthcare Distribution Ltd)                |
| 56457 | Venlafaxine 75mg tablets (Teva UK Ltd)                                        |
| 56662 | Venlafaxine 37.5mg tablets (A A H Pharmaceuticals Ltd)                        |
| 57751 | Tonpular XL 150mg capsules (Wockhardt UK Ltd)                                 |
| 58291 | Mirtazapine 15mg orodispersible tablets (Pfizer Ltd)                          |
| 58625 | Mirtazapine 45mg tablets (Actavis UK Ltd)                                     |
| 58681 | Venladex XL 75mg tablets (Dexcel-Pharma Ltd)                                  |
| 58726 | Venladex XL 150mg tablets (Dexcel-Pharma Ltd)                                 |
| 58837 | Venlafaxine 37.5mg modified-release capsules                                  |
| 59035 | Venlablue XL 37.5mg capsules (Bluefish Pharmaceuticals AB)                    |
| 59563 | Venlafaxine 75mg modified-release capsules (Kent Pharmaceuticals Ltd)         |
| 59593 | Fluanxol 500microgram tablets (Lexon (UK) Ltd)                                |
| 59694 | Mirtazapine 30mg orodispersible tablets (Phoenix Healthcare Distribution Ltd) |
| 59753 | Sunveniz XL 150mg tablets (Sun Pharmaceuticals UK Ltd)                        |
| 59923 | Venlafaxine 37.5mg tablets (Bristol Laboratories Ltd)                         |
| 59953 | Mirtazapine 15mg tablets (Almus Pharmaceuticals Ltd)                          |
| 59954 | Mirtazapine 45mg tablets (Almus Pharmaceuticals Ltd)                          |
| 60370 | Zispin SolTab 15mg orodispersible tablets (Mawdsley-Brooks & Company Ltd)     |
| 60449 | Venlafaxine 75mg tablets (A A H Pharmaceuticals Ltd)                          |
| 60538 | Mirtazapine 30mg tablets (DE Pharmaceuticals)                                 |

|       |                                                                           |
|-------|---------------------------------------------------------------------------|
| 60549 | Venlafaxine 150mg modified-release capsules (Kent Pharmaceuticals Ltd)    |
| 60843 | Sunveniz XL 75mg tablets (Sun Pharmaceuticals UK Ltd)                     |
| 60895 | Venlafaxine 37.5mg tablets (Teva UK Ltd)                                  |
| 61236 | Bonilux XL 150mg capsules (Sandoz Ltd)                                    |
| 61547 | Mirtazapine 15mg/ml oral solution sugar free (DE Pharmaceuticals)         |
| 61856 | Mirtazapine 15mg orodispersible tablets (Consilient Health Ltd)           |
| 62688 | Duloxetine 30mg gastro-resistant capsules (Sigma Pharmaceuticals Plc)     |
| 62734 | Venlafaxine 150mg/5ml oral suspension                                     |
| 63216 | Cymbalta 60mg gastro-resistant capsules (Mawdsley-Brooks & Company Ltd)   |
| 63268 | Venlafaxine 75mg/5ml oral suspension                                      |
| 63370 | Duloxetine 30mg gastro-resistant capsules (Mawdsley-Brooks & Company Ltd) |
| 63403 | Mirtazapine 30mg tablets (Teva UK Ltd)                                    |
| 63763 | Duloxetine 60mg gastro-resistant capsules (A A H Pharmaceuticals Ltd)     |
| 63859 | Venlafaxine 75mg tablets (Waymade Healthcare Plc)                         |

## Rheumatoid arthritis

| Medcode | Readterm                                                     |
|---------|--------------------------------------------------------------|
| 844     | Rheumatoid arthritis                                         |
| 4186    | Juvenile rheumatoid arthritis - Still's disease              |
| 5723    | Rheumatoid nodule                                            |
| 6916    | Seronegative rheumatoid arthritis                            |
| 8350    | Flare of rheumatoid arthritis                                |
| 9707    | Seropositive erosive rheumatoid arthritis                    |
| 9954    | Rheumatoid lung                                              |
| 12019   | Seropositive rheumatoid arthritis, unspecified               |
| 18155   | Rheumatoid bursitis                                          |
| 21358   | Rheumatoid arthritis of shoulder                             |
| 21533   | Pauciarticular juvenile rheumatoid arthritis                 |
| 23552   | Felty's syndrome                                             |
| 23834   | Adult Still's Disease                                        |
| 27557   | Juvenile rheumatoid arthritis NOS                            |
| 28853   | Fibrosing alveolitis associated with rheumatoid arthritis    |
| 30548   | Rheumatoid vasculitis                                        |
| 31054   | Rheumatoid arthritis - multiple joint                        |
| 31209   | Myopathy due to rheumatoid arthritis                         |
| 31360   | Juvenile rheumatoid arthritis                                |
| 31724   | Rheumatoid lung                                              |
| 32001   | Adult-onset Still's disease                                  |
| 33264   | O/E-hands-rheumatoid spindling                               |
| 36276   | Monarticular juvenile rheumatoid arthritis                   |
| 37431   | Rheumatoid arthropathy + visceral/systemic involvement NOS   |
| 41941   | Rheumatoid arthritis of PIP joint of finger                  |
| 42299   | Rheumatoid arthritis of MCP joint                            |
| 43816   | Rheumatoid carditis                                          |
| 44203   | Other rheumatoid arthritis of spine                          |
| 44743   | Rheumatoid arthritis of cervical spine                       |
| 46436   | Rheumatoid lung disease                                      |
| 47831   | Acute polyarticular juvenile rheumatoid arthritis            |
| 48832   | Rheumatoid arthritis of wrist                                |
| 49067   | Rheumatoid arthritis of hip                                  |
| 49227   | Other rheumatoid arthropathy + visceral/systemic involvement |
| 49787   | Rheumatoid myocarditis                                       |
| 50644   | Juvenile rheumatoid arthropathy unspecified                  |
| 50863   | Rheumatoid arthritis of knee                                 |
| 51238   | Rheumatoid arthritis of 1st MTP joint                        |
| 51239   | Rheumatoid arthritis of ankle                                |
| 53621   | Rheumatoid nodule                                            |

|        |                                                             |
|--------|-------------------------------------------------------------|
| 56202  | [X]Seropositive rheumatoid arthritis, unspecified           |
| 56838  | Caplan's syndrome                                           |
| 59738  | Rheumatoid arthritis of elbow                               |
| 62401  | Polyneuropathy in rheumatoid arthritis                      |
| 63198  | Rheumatoid arthritis of DIP joint of finger                 |
| 63365  | Rheumatoid arthritis of distal radio-ulnar joint            |
| 70221  | [X]Other specified rheumatoid arthritis                     |
| 70658  | Rheumatoid arthritis of talonavicular joint                 |
| 71784  | Rheumatoid arthritis of other tarsal joint                  |
| 73619  | Rheumatoid arthritis of subtalar joint                      |
| 93715  | [X]Other seropositive rheumatoid arthritis                  |
| 99414  | Rheumatoid arthritis of lesser MTP joint                    |
| 100776 | Rheumatoid arthritis of sacro-iliac joint                   |
| 100914 | Rheumatoid arthritis of acromioclavicular joint             |
| 106440 | [X]Rheumatoid arthritis+involvement/other organs or systems |
| 107112 | Rheumatoid arthritis of IP joint of toe                     |
| 107791 | Rheumatoid arthritis of tibio-fibular joint                 |
| 107963 | Rheumatoid arthritis of sternoclavicular joint              |
| 27603  | Rheumatoid arthritis and other inflammatory polyarthropathy |
| 6639   | H/O: rheumatoid arthritis                                   |
| 102088 | Delivery of rehabilitation for rheumatoid arthritis         |
| 105507 | Rheumatoid arthritis annual review                          |

| icd   | icd_description                                             |
|-------|-------------------------------------------------------------|
| I52.8 | Rheumatoid carditis                                         |
| J99.0 | Rheumatoid lung disease                                     |
| M05   | Seropositive rheumatoid arthritis                           |
| M05.0 | Felty's syndrome                                            |
| M05.1 | Rheumatoid lung disease                                     |
| M05.2 | Rheumatoid vasculitis                                       |
| M05.3 | Rheumatoid arthritis with involvement of oth organs and sys |
| M05.8 | Other seropositive rheumatoid arthritis                     |
| M05.9 | Seropositive rheumatoid arthritis, unspecified              |
| M06.0 | Seronegative rheumatoid arthritis                           |
| M06.1 | Adult-onset Still's disease                                 |
| M06.2 | Rheumatoid bursitis                                         |
| M06.3 | Rheumatoid nodule                                           |
| M06.8 | Other specified rheumatoid arthritis                        |
| M06.9 | Rheumatoid arthritis, unspecified                           |
| M08.0 | Juvenile rheumatoid arthritis                               |
| M08.2 | Juvenile arthritis with systemic onset                      |



|       |                                       |
|-------|---------------------------------------|
| M08.3 | Juvenile polyarthritis (seronegative) |
| M08.4 | Pauciarticular juvenile arthritis     |

## Lupus erythematosus

| Medcode | Readterm                                              |
|---------|-------------------------------------------------------|
| 4125    | Lupus erythematosus                                   |
| 7522    | Lupus erythematosus NOS                               |
| 7871    | Systemic lupus erythematosus                          |
| 11920   | Systemic lupus erythematosus with pericarditis        |
| 20007   | Disseminated lupus erythematosus                      |
| 22205   | Lupus nephritis                                       |
| 25390   | Subacute cutaneous lupus erythematosus                |
| 29519   | Systemic lupus erythematosus with organ or sys involv |
| 31564   | Lung disease with systemic lupus erythematosus        |
| 33449   | Lupus erythematosus chronicus                         |
| 36942   | Drug-induced systemic lupus erythematosus             |
| 40797   | Lupus erythematosus migrans                           |
| 42719   | Systemic lupus erythematosus NOS                      |
| 44095   | Polyneuropathy in disseminated lupus erythematosus    |
| 44984   | Lupus erythematosus tumidus                           |
| 46148   | Lupus erythematosus profundus                         |
| 47672   | Nephrotic syndrome in systemic lupus erythematosus    |
| 51798   | Systemic lupus activity measure                       |
| 58706   | [X]Other forms of systemic lupus erythematosus        |
| 63955   | Lupus erythematosus unguium mutilans                  |
| 65391   | Lupus erythematosus nodularis                         |
| 99435   | Neonatal lupus erythematosus                          |
| 101433  | Cerebral lupus                                        |
| 41148   | Renal tubulo-interstitial disorder in SLE             |
| 57675   | Libman-Sacks disease                                  |
| 108072  | Myopathy due to disseminated lupus erythematosus      |

| icd   | icd_description                                       |
|-------|-------------------------------------------------------|
| L93.1 | Subacute cutaneous lupus erythematosus                |
| L93.2 | Other local lupus erythematosus                       |
| M32   | Systemic lupus erythematosus                          |
| M32.0 | Drug-induced systemic lupus erythematosus             |
| M32.1 | Systemic lupus erythematosus with organ or sys involv |
| M32.8 | Other forms of systemic lupus erythematosus           |
| M32.9 | Systemic lupus erythematosus, unspecified             |

## Inflammatory bowel disease

| Medcode | Readterm                                           |
|---------|----------------------------------------------------|
| 593     | Crohn's disease                                    |
| 704     | Ulcerative colitis                                 |
| 1784    | Ulcerative colitis and/or proctitis                |
| 1796    | Inflammatory bowel disease                         |
| 5133    | Idiopathic proctocolitis                           |
| 5749    | H/O: ulcerative colitis                            |
| 6538    | Crohn's colitis                                    |
| 6650    | Ulcerative proctocolitis                           |
| 8347    | Ulcerative proctitis                               |
| 9359    | Crohn's disease of the small bowel NOS             |
| 11286   | Regional enteritis - Crohn's disease               |
| 12575   | Juvenile arthritis in Crohn's disease              |
| 15207   | Idiopathic proctocolitis NOS                       |
| 15773   | Regional ileocolitis                               |
| 17641   | Arthropathy in ulcerative colitis                  |
| 20480   | Arthropathy in Crohn's disease                     |
| 20688   | Crohn's disease of the large bowel NOS             |
| 22516   | Exacerbation of ulcerative colitis                 |
| 24550   | Other idiopathic proctocolitis                     |
| 24858   | Ulcerative rectosigmoiditis                        |
| 28476   | Crohn's disease of the terminal ileum              |
| 29616   | Orofacial Crohn's disease                          |
| 30433   | Ulcerative (chronic) enterocolitis                 |
| 33456   | Ulcerative proctocolitis NOS                       |
| 36913   | Exacerbation of Crohn's disease of small intestine |
| 39037   | Exacerbation of Crohn's disease of large intestine |
| 39278   | Crohn's disease of the ileum NOS                   |
| 42822   | Ulcerative (chronic) ileocolitis                   |
| 43090   | Other idiopathic proctocolitis NOS                 |
| 44426   | Regional enteritis of the large bowel              |
| 48732   | Ulcerative ileocolitis                             |
| 51576   | Regional enteritis of the small bowel              |
| 51578   | Granulomatous enteritis                            |
| 52449   | Regional enteritis NOS                             |
| 53743   | [X]Other ulcerative colitis                        |
| 59994   | Crohn's disease NOS                                |
| 62628   | Regional enteritis of the colon                    |
| 63036   | Regional enteritis of the jejunum                  |
| 64773   | Regional enteritis of the rectum                   |
| 66238   | Crohn's disease of the ileum unspecified           |

|        |                                          |
|--------|------------------------------------------|
| 69959  | [X]Other Crohn's disease                 |
| 71083  | Juvenile arthritis in ulcerative colitis |
| 71945  | Regional enteritis of the duodenum       |
| 107313 | Management of inflammatory bowel disease |

| icd   | icd_description                                       |
|-------|-------------------------------------------------------|
| K50   | Crohn's disease [regional enteritis]                  |
| K50.0 | Crohn's disease of small intestine                    |
| K50.1 | Crohn's disease of large intestine                    |
| K50.8 | Other Crohn's disease                                 |
| K50.9 | Crohn's disease, unspecified                          |
| K51   | Ulcerative colitis                                    |
| K51.0 | Ulcerative (chronic) enterocolitis                    |
| K51.1 | Ulcerative (chronic) ileocolitis                      |
| K51.2 | Ulcerative (chronic) proctitis                        |
| K51.3 | Ulcerative (chronic) rectosigmoiditis                 |
| K51.4 | Pseudopolyposis of colon                              |
| K51.5 | Mucosal proctocolitis                                 |
| K51.8 | Other ulcerative colitis                              |
| K51.9 | Ulcerative colitis, unspecified                       |
| M07.4 | Arthropathy in Crohn's disease [regional enteritis]   |
| M07.5 | Arthropathy in ulcerative colitis                     |
| M09.1 | Juvenile arthritis in Crohn's disease [reg enteritis] |
| M09.2 | Juvenile arthritis in ulcerative colitis              |

## Chronic obstructive pulmonary disease

| Medcode | Readterm                                                     |
|---------|--------------------------------------------------------------|
| 794     | emphysema                                                    |
| 998     | chronic obstructive airways disease                          |
| 1001    | chronic obstructive pulmonary disease                        |
| 1446    | acute exacerbation of chronic obstructive airways disease    |
| 3243    | chronic bronchitis                                           |
| 4084    | Airways obstructn irreversible                               |
| 5710    | chronic obstructive airways disease nos                      |
| 5798    | Chronic asthmatic bronchitis                                 |
| 5909    | Chronic wheezy bronchitis                                    |
| 7884    | chron obstruct pulmonary dis wth acute exacerbation, unspec  |
| 9876    | severe chronic obstructive pulmonary disease                 |
| 10802   | moderate chronic obstructive pulmonary disease               |
| 10863   | mild chronic obstructive pulmonary disease                   |
| 10980   | centrilobular emphysema                                      |
| 11019   | admit copd emergency                                         |
| 11150   | Mucopurulent chronic bronchitis                              |
| 11287   | chronic obstructive pulmonary disease annual review          |
| 12166   | other specified chronic obstructive airways disease          |
| 14798   | emphysematous bronchitis                                     |
| 15157   | chronic bronchitis nos                                       |
| 15626   | chronic catarrhal bronchitis                                 |
| 16410   | Other emphysema NOS                                          |
| 18476   | copd follow-up                                               |
| 18501   | copd self-management plan given                              |
| 18621   | chronic obstructive pulmonary disease follow-up              |
| 19003   | emergency copd admission since last appointment              |
| 19106   | copd accident and emergency attendance since last visit      |
| 21061   | chronic obstruct pulmonary dis with acute lower resp infectn |
| 23492   | chronic bullous emphysema nos                                |
| 23618   | Chronic tracheitis                                           |
| 24248   | mixed simple and mucopurulent chronic bronchitis             |
| 25603   | simple chronic bronchitis                                    |
| 26306   | chronic bullous emphysema                                    |
| 27819   | obstructive chronic bronchitis                               |
| 28743   | Number of COPD exacerbations in past year                    |
| 33450   | emphysema nos                                                |
| 37247   | chronic obstructive pulmonary disease nos                    |
| 37959   | fetid chronic bronchitis                                     |
| 40159   | purulent chronic bronchitis                                  |
| 40788   | Other emphysema                                              |

|        |                                                               |
|--------|---------------------------------------------------------------|
| 42624  | coad follow-up                                                |
| 44525  | obstructive chronic bronchitis nos                            |
| 45089  | Chronic tracheobronchitis                                     |
| 45770  | chronic obstructive pulmonary disease disturbs sleep          |
| 45771  | chronic obstructive pulmonary disease does not disturb sleep  |
| 45777  | chronic obstructive pulmonary disease clini management plan   |
| 46036  | multiple copd emergency hospital admissions                   |
| 46578  | panlobular emphysema                                          |
| 56860  | segmental bullous emphysema                                   |
| 60188  | giant bullous emphysema                                       |
| 61118  | simple chronic bronchitis nos                                 |
| 61513  | mucopurulent chronic bronchitis nos                           |
| 63479  | MacLeod's unilateral emphysema                                |
| 65733  | [x]other specified chronic obstructive pulmonary disease      |
| 66043  | other chronic bronchitis                                      |
| 66058  | [X]Other emphysema                                            |
| 67040  | other specified chronic obstructive pulmonary disease         |
| 68066  | other chronic bronchitis nos                                  |
| 68662  | Zonal bullous emphysema                                       |
| 93568  | very severe chronic obstructive pulmonary disease             |
| 98283  | copd structured smoking assessment declined - enh serv admin  |
| 98284  | refer copd structured smoking assessment - enhanc serv admin  |
| 99536  | bullous emphysema with collapse                               |
| 99948  | copd patient unsuitable for pulmonary rehab - enh serv admin  |
| 101042 | issue of chronic obstructive pulmonary disease rescue pack    |
| 102685 | chronic obstructive pulmonary disease 3 monthly review        |
| 103007 | chronic obstructive pulmonary disease 6 monthly review        |
| 103400 | referred for copd structured smoking assessment               |
| 103494 | History of chronic obstructive pulmonary disease              |
| 103558 | Preferred place of care for next exacerbation of COPD         |
| 103678 | Chronic obstructiv pulmonary disease medication optimisation  |
| 103864 | COPD patient unsuitable for pulmonary rehabilitation          |
| 104117 | COPD self-management plan agreed                              |
| 104169 | COPD self-management plan review                              |
| 104265 | GP OOH service notified of COPD care plan                     |
| 104481 | Has chronic obstructive pulmonary disease care plan           |
| 104608 | End stage chronic obstructive airways disease                 |
| 104710 | On COPD (chr obstruc pulmonary disease) supportv cre pathway  |
| 104985 | On chronic obstructive pulmonary disease supprtv cre pathway  |
| 104998 | Chronic obstructive pulmonry disease rescue pack not indicatd |
| 105457 | Chronic obstructive pulmonary disease care pathway            |
| 106805 | Chronic asthma with fixed airflow obstruction                 |
| 106945 | Chronic obstructive pulmonary disease rescue pack declined    |

| icd   | icd_description                                             |
|-------|-------------------------------------------------------------|
| J41   | Simple and mucopurulent chronic bronchitis                  |
| J41.0 | Simple chronic bronchitis                                   |
| J41.1 | Mucopurulent chronic bronchitis                             |
| J41.8 | Mixed simple and mucopurulent chronic bronchitis            |
| J42   | Unspecified chronic bronchitis                              |
| J43   | Emphysema                                                   |
| J43.0 | MacLeod's syndrome                                          |
| J43.1 | Panlobular emphysema                                        |
| J43.2 | Centrilobular emphysema                                     |
| J43.8 | Other emphysema                                             |
| J43.9 | Emphysema, unspecified                                      |
| J44   | Other chronic obstructive pulmonary disease                 |
| J44.0 | Chronic obstruct pulmonary dis with acute lower resp infec  |
| J44.1 | Chron obstruct pulmonary dis wth acute exacerbation, unspec |
| J44.8 | Other specified chronic obstructive pulmonary disease       |
| J44.9 | Chronic obstructive pulmonary disease, unspecified          |

## Asthma

| Medcode | Readterm                                    |
|---------|---------------------------------------------|
| 78      | asthma                                      |
| 185     | acute exacerbation of asthma                |
| 232     | asthma attack                               |
| 233     | severe asthma attack                        |
| 1208    | childhood asthma                            |
| 1555    | bronchial asthma                            |
| 2290    | allergic asthma                             |
| 3018    | mild asthma                                 |
| 3366    | severe asthma                               |
| 3458    | occasional asthma                           |
| 3665    | late onset asthma                           |
| 4442    | asthma unspecified                          |
| 4606    | exercise induced asthma                     |
| 4836    | nocturnal cough / wheeze                    |
| 4892    | status asthmaticus nos                      |
| 5267    | intrinsic asthma                            |
| 5627    | hay fever with asthma                       |
| 5867    | exercise induced asthma                     |
| 6707    | extrinsic asthma with asthma attack         |
| 7058    | emergency admission, asthma                 |
| 7146    | extrinsic (atopic) asthma                   |
| 7191    | asthma limiting activities                  |
| 7229    | asthma prophylactic medication used         |
| 7416    | asthma disturbing sleep                     |
| 7731    | pollen asthma                               |
| 8335    | asthma attack nos                           |
| 9018    | number of asthma exacerbations in past year |
| 10487   | asthma - currently active                   |
| 11022   | asthma trigger                              |
| 11370   | asthma confirmed                            |
| 12987   | late-onset asthma                           |
| 13064   | asthma severity                             |
| 13065   | moderate asthma                             |
| 13173   | asthma not disturbing sleep                 |
| 13174   | asthma not limiting activities              |
| 13175   | asthma disturbs sleep frequently            |
| 14777   | extrinsic asthma without status asthmaticus |
| 15248   | hay fever with asthma                       |
| 16070   | asthma nos                                  |
| 16667   | asthma control step 2                       |



|        |                                                           |
|--------|-----------------------------------------------------------|
| 16785  | asthma control step 1                                     |
| 18224  | asthma control step 3                                     |
| 18323  | intrinsic asthma with asthma attack                       |
| 19519  | asthma treatment compliance unsatisfactory                |
| 19520  | asthma treatment compliance satisfactory                  |
| 20860  | asthma control step 5                                     |
| 20886  | asthma control step 4                                     |
| 21232  | allergic asthma nec                                       |
| 22752  | occupational asthma                                       |
| 24479  | emergency asthma admission since last appointment         |
| 24506  | further asthma - drug prevent.                            |
| 24884  | asthma causes daytime symptoms 1 to 2 times per week      |
| 25181  | asthma restricts exercise                                 |
| 25796  | mixed asthma                                              |
| 26501  | asthma never causes daytime symptoms                      |
| 26503  | asthma causes daytime symptoms most days                  |
| 26504  | asthma never restricts exercise                           |
| 26506  | asthma severely restricts exercise                        |
| 26861  | asthma sometimes restricts exercise                       |
| 27926  | extrinsic asthma with status asthmaticus                  |
| 29325  | intrinsic asthma without status asthmaticus               |
| 29645  | asthma control step 0                                     |
| 30815  | asthma causing night waking                               |
| 31167  | asthma night-time symptoms                                |
| 31225  | asthma causes daytime symptoms 1 to 2 times per month     |
| 38143  | asthma never disturbs sleep                               |
| 38144  | asthma limits walking up hills or stairs                  |
| 38145  | asthma limits walking on the flat                         |
| 38146  | asthma disturbs sleep weekly                              |
| 39478  | wood asthma                                               |
| 39570  | asthma causes night symptoms 1 to 2 times per month       |
| 40823  | brittle asthma                                            |
| 41017  | aspirin induced asthma                                    |
| 41020  | absent from work or school due to asthma                  |
| 42824  | asthma daytime symptoms                                   |
| 45073  | intrinsic asthma nos                                      |
| 45782  | extrinsic asthma nos                                      |
| 47337  | asthma accident and emergency attendance since last visit |
| 47684  | detergent asthma                                          |
| 58196  | intrinsic asthma with status asthmaticus                  |
| 73522  | work aggravated asthma                                    |
| 102301 | asthma trigger - seasonal                                 |
| 102341 | asthma trigger - pollen                                   |

|        |                                                              |
|--------|--------------------------------------------------------------|
| 102395 | asthma causes symptoms most nights                           |
| 102400 | asthma causes night time symptoms 1 to 2 times per week      |
| 102449 | asthma trigger - respiratory infection                       |
| 102713 | asthma limits activities 1 to 2 times per month              |
| 102871 | asthma trigger - exercise                                    |
| 102888 | asthma limits activities 1 to 2 times per week               |
| 102952 | asthma trigger - warm air                                    |
| 103321 | asthma trigger - animals                                     |
| 32727  | Hyperreactive airways disease                                |
| 103612 | Asthma never causes night symptoms                           |
| 103813 | Asthma trigger - cold air                                    |
| 103944 | Asthma trigger - airborne dust                               |
| 103945 | Asthma trigger - damp                                        |
| 103952 | Asthma trigger - emotion                                     |
| 103955 | Asthma trigger - tobacco smoke                               |
| 103998 | Asthma limits activities most days                           |
| 93353  | Sequoiosis (red-cedar asthma)                                |
| 9552   | change in asthma management plan                             |
| 9663   | step up change in asthma management plan                     |
| 10043  | asthma annual review                                         |
| 10274  | asthma medication review                                     |
| 13176  | asthma follow-up                                             |
| 47993  | Does not have asthma management plan                         |
| 105420 | Asthma self-management plan review                           |
| 105674 | Asthma self-management plan agreed                           |
| 107167 | Number days absent from school due to asthma in past 6 month |
| 99793  | patient has a written asthma personal action plan            |
| 7378   | asthma management plan given                                 |
| 18223  | step down change in asthma management plan                   |
| 25791  | asthma clinical management plan                              |

| icd   | icd_description               |
|-------|-------------------------------|
| J45   | Asthma                        |
| J45.0 | Predominantly allergic asthma |
| J45.1 | Nonallergic asthma            |
| J45.8 | Mixed asthma                  |
| J45.9 | Asthma, unspecified           |
| J46   | Status asthmaticus            |

## Antiasthmatics

| Prodcod e | Product name                                                                      |
|-----------|-----------------------------------------------------------------------------------|
| 17894     | accolate                                                                          |
| 1973      | accolate tablets 20mg [astrazenec]                                                |
| 1861      | aerobec autohaler 100micrograms/actuation [meda]                                  |
| 2159      | aerobec autohaler 50micrograms/actuation [meda]                                   |
| 4499      | aerobec forte autohaler 250micrograms/actuation [meda]                            |
| 39200     | aerobec forte autohaler 250micrograms/actuation [meda]                            |
| 10360     | aerocrom aerosol inhaler [castlemead]                                             |
| 18314     | aerocrom sincroner [castlemead]                                                   |
| 34134     | aerolin 400 aerosol inhaler 100micrograms/actuation [3m]                          |
| 20680     | aerolin autohaler                                                                 |
| 942       | aerolin autohaler breath actuated inhaler 100micrograms/actuation [3m]            |
| 30240     | aerolin autohaler cfc free breath actuated inhaler 100micrograms/actuation [3m]   |
| 3322      | aerolin inh 400 100 mcg aer                                                       |
| 12479     | aerolin inh auto refil 100 mcg aer                                                |
| 26654     | aerolin inhaler auto refil                                                        |
| 26716     | airomir autohaler cfc free b/a                                                    |
| 5740      | airomir autohaler cfc free breath actuated inhaler 100micrograms/actuation [ivax] |
| 2655      | airomir cfc free inhaler 100micrograms/inhalation [teva]                          |
| 8508      | alupent aerosol inhaler 750micrograms/inhalation [boeh ingl]                      |
| 8149      | alupent aerosol refill 750micrograms/inhalation [boeh ingl]                       |
| 12470     | alupent expectorant mixture [boeh ingl]                                           |
| 22082     | alupent expectorant tablets [boeh ingl]                                           |
| 2901      | alupent sugar free oral solution 10mg/5ml [boeh ingl]                             |
| 8321      | alupent tablets 20mg [boeh ingl]                                                  |
| 6839      | alvesco cfc free inhaler 160micrograms/actuation [nycomed]                        |
| 21224     | alvesco cfc free inhaler 80micrograms/actuation [nycomed]                         |
| 8610      | aminophylline 1 gm sup                                                            |
| 218       | aminophylline 100 mg cap                                                          |
| 18308     | aminophylline 100 mg sup                                                          |
| 25022     | aminophylline 150 mg sup                                                          |
| 20171     | aminophylline 180 mg sup                                                          |
| 27842     | aminophylline 2 ml inj                                                            |
| 22080     | aminophylline 20 ml inj                                                           |
| 10289     | aminophylline 200 mg sup                                                          |
| 8470      | aminophylline 225 mg sup                                                          |
| 15025     | aminophylline 25 mg sup                                                           |
| 24117     | aminophylline 300 mg sup                                                          |
| 27593     | aminophylline 350 mg sup                                                          |
| 8653      | aminophylline 360 mg sup                                                          |
| 20225     | aminophylline 500 mg inj                                                          |

|       |                                                                               |
|-------|-------------------------------------------------------------------------------|
| 19350 | aminophylline 62.5 mg sup                                                     |
| 6988  | aminophylline hydrate modified release tablet 100mg                           |
| 17002 | aminophylline hydrate modified release tablet 225mg                           |
| 16994 | aminophylline hydrate modified release tablet 350mg                           |
| 14991 | aminophylline injection 250mg/10ml                                            |
| 42910 | aminophylline injection 250mg/10ml [martindale]                               |
| 10561 | aminophylline injection 250mg/ml                                              |
| 42511 | aminophylline injection 25mg/ml [celltech]                                    |
| 25937 | aminophylline intramuscular 500 mg inj                                        |
| 8057  | aminophylline modified release tablet 100mg                                   |
| 555   | aminophylline modified release tablet 225mg                                   |
| 30596 | aminophylline modified release tablet 225mg [actavis]                         |
| 29273 | aminophylline modified release tablet 225mg [hillcross]                       |
| 4514  | aminophylline modified release tablet 350mg                                   |
| 23572 | aminophylline sr tablets 225mg [ivax]                                         |
| 25125 | aminophylline suppository 360mg                                               |
| 8056  | aminophylline tablets 100mg                                                   |
| 17140 | aminophylline tablets 200mg                                                   |
| 13529 | amnivent sustained release tablets 225mg [ashbourne]                          |
| 4601  | asmabec clickhaler dry powder inhaler 100micrograms [focus]                   |
| 14567 | asmabec clickhaler dry powder inhaler 250micrograms [focus]                   |
| 9577  | asmabec clickhaler dry powder inhaler 50micrograms [focus]                    |
| 9477  | asmabec spacehaler 100micrograms/actuation [celltech]                         |
| 14590 | asmabec spacehaler 250micrograms/actuation [celltech]                         |
| 19389 | asmabec spacehaler 50micrograms/actuation [celltech]                          |
| 16433 | asmanex twisthaler dry powder inhaler 200micrograms/actuation [m s d]         |
| 17590 | asmanex twisthaler dry powder inhaler 400micrograms/actuation [m s d]         |
| 1087  | asmasal clickhaler dry powder inhaler 95micrograms [focus]                    |
| 9651  | asmasal spacehaler 100micrograms/inhalation [celltech]                        |
| 21859 | asmaven aerosol inhaler 100micrograms [berk]                                  |
| 25784 | atimos modulite cfc free inhaler 12micrograms/actuation [chiesi]              |
| 19805 | atrovent                                                                      |
| 2994  | atrovent aerocaps 40mcg [boeh ingl]                                           |
| 43090 | atrovent aerocaps inhalation powder capsules 40mcg [boeh ingl]                |
| 9681  | atrovent aerohaler 40mcg [boeh ingl]                                          |
| 43105 | atrovent aerohaler inhalation powder capsules with device 40mcg [boeh ingl]   |
| 534   | atrovent aerosol inhaler 20micrograms/actuation [boeh ingl]                   |
| 1697  | atrovent autohaler breath actuated inhaler 20micrograms/actuation [boeh ingl] |
| 6512  | atrovent cfc free inhaler 20micrograms/actuation [boeh ingl]                  |
| 20720 | atrovent forte                                                                |
| 3306  | atrovent forte aerosol inhaler 40micrograms/actuation [boeh ingl]             |
| 19737 | atrovent nebuliser solution (1ml vial)                                        |
| 1962  | atrovent udvs nebuliser solution 0.25mg/ml [boeh ingl]                        |

|       |                                                                                 |
|-------|---------------------------------------------------------------------------------|
| 6911  | atrovent udvs nebuliser solution 250micrograms/1ml [boeh ingl]                  |
| 7140  | atrovent udvs nebuliser solution 500micrograms/2ml [boeh ingl]                  |
| 14527 | bambec tablets 10mg [astrazenec]                                                |
| 13575 | bambec tablets 20mg [astrazenec]                                                |
| 7192  | bambuterol tablets 10mg                                                         |
| 12144 | bambuterol tablets 20mg                                                         |
| 19031 | bdp spacehaler 100micrograms/actuation [celltech]                               |
| 14524 | bdp spacehaler 250micrograms/actuation [celltech]                               |
| 18394 | bdp spacehaler 50micrograms/actuation [celltech]                                |
| 13815 | beclazone aerosol inhaler 100micrograms/actuation [actavis]                     |
| 1100  | beclazone aerosol inhaler 100micrograms/actuation [ivax]                        |
| 1885  | beclazone aerosol inhaler 200micrograms/actuation [ivax]                        |
| 4803  | beclazone aerosol inhaler 250micrograms/actuation [actavis]                     |
| 1551  | beclazone aerosol inhaler 250micrograms/actuation [ivax]                        |
| 9599  | beclazone aerosol inhaler 50micrograms/actuation [actavis]                      |
| 2992  | beclazone aerosol inhaler 50micrograms/actuation [ivax]                         |
| 895   | beclazone easi-breathe breath actuated inhaler 100micrograms/actuation [ivax]   |
| 1243  | beclazone easi-breathe breath actuated inhaler 250micrograms/actuation [ivax]   |
| 1725  | beclazone easi-breathe breath actuated inhaler 50micrograms/actuation [ivax]    |
| 20763 | becloforte                                                                      |
| 1236  | becloforte aerosol inhaler 250micrograms/actuation [a & h]                      |
| 3363  | becloforte diskhaler 400micrograms/actuation [a & h]                            |
| 2892  | becloforte disks (refill pack) 400micrograms/actuation [a & h]                  |
| 1552  | becloforte easi-breathe breath actuated inhaler 250micrograms/actuation [a & h] |
| 3119  | becloforte integra inhaler with compact spacer 250micrograms/actuation [glaxo]  |
| 8111  | becloforte vm pack 250micrograms/actuation [a & h]                              |
| 38    | beclometasone aerosol inhaler 100micrograms/actuation                           |
| 28640 | beclometasone aerosol inhaler 100micrograms/actuation [actavis]                 |
| 26063 | beclometasone aerosol inhaler 100micrograms/actuation [aps]                     |
| 21482 | beclometasone aerosol inhaler 100micrograms/actuation [gen (uk)]                |
| 25204 | beclometasone aerosol inhaler 100micrograms/actuation [hillcross]               |
| 33849 | beclometasone aerosol inhaler 100micrograms/actuation [neolab]                  |
| 1259  | beclometasone aerosol inhaler 200micrograms/actuation                           |
| 34794 | beclometasone aerosol inhaler 200micrograms/actuation [hillcross]               |
| 1242  | beclometasone aerosol inhaler 250micrograms/actuation                           |
| 34315 | beclometasone aerosol inhaler 250micrograms/actuation [actavis]                 |
| 30210 | beclometasone aerosol inhaler 250micrograms/actuation [aps]                     |
| 29325 | beclometasone aerosol inhaler 250micrograms/actuation [gen (uk)]                |
| 33258 | beclometasone aerosol inhaler 250micrograms/actuation [hillcross]               |
| 34859 | beclometasone aerosol inhaler 250micrograms/actuation [neolab]                  |
| 41412 | beclometasone aerosol inhaler 400micrograms/actuation                           |
| 3018  | beclometasone aerosol inhaler 50micrograms/actuation                            |
| 32874 | beclometasone aerosol inhaler 50micrograms/actuation [actavis]                  |

|       |                                                                                                         |
|-------|---------------------------------------------------------------------------------------------------------|
| 34739 | beclometasone aerosol inhaler 50micrograms/actuation [aps]                                              |
| 31774 | beclometasone aerosol inhaler 50micrograms/actuation [gen (uk)]                                         |
| 34919 | beclometasone aerosol inhaler 50micrograms/actuation [hillcross]                                        |
| 34428 | beclometasone aerosol inhaler 50micrograms/actuation [neolab]                                           |
| 1734  | beclometasone breath actuated inhaler 100micrograms/actuation                                           |
| 27679 | beclometasone breath actuated inhaler 100micrograms/actuation [aps]                                     |
| 2600  | beclometasone breath actuated inhaler 250micrograms/actuation                                           |
| 28073 | beclometasone breath actuated inhaler 250micrograms/actuation [aps]                                     |
| 2160  | beclometasone breath actuated inhaler 50micrograms/actuation                                            |
| 30238 | beclometasone breath actuated inhaler 50micrograms/actuation [aps]                                      |
| 4759  | beclometasone capsules (for inhalation) 100micrograms                                                   |
| 9233  | beclometasone capsules (for inhalation) 200micrograms                                                   |
| 7653  | beclometasone capsules (for inhalation) 400micrograms                                                   |
| 15326 | beclometasone cfc free inhaler 100micrograms/actuation                                                  |
| 14321 | beclometasone cfc free inhaler 200micrograms/actuation                                                  |
| 21005 | beclometasone cfc free inhaler 250micrograms/actuation                                                  |
| 16584 | beclometasone cfc free inhaler 50micrograms/actuation                                                   |
| 46157 | beclometasone cyclocaps capsules (for inhalation) 200micrograms [teva]                                  |
| 41269 | beclometasone cyclocaps capsules (for inhalation) 400micrograms [teva]                                  |
| 4365  | beclometasone disc 100micrograms                                                                        |
| 2893  | beclometasone disc 200micrograms                                                                        |
| 2148  | beclometasone disc 400micrograms                                                                        |
| 5522  | beclometasone dry powder inhaler 100micrograms/actuation                                                |
| 5521  | beclometasone dry powder inhaler 200micrograms/actuation                                                |
| 5804  | beclometasone dry powder inhaler 250micrograms/actuation                                                |
| 11497 | beclometasone dry powder inhaler 400micrograms/actuation                                                |
| 5992  | beclometasone dry powder inhaler 50micrograms/actuation                                                 |
| 9921  | beclometasone extrafine particle cfc free breath actuated inhaler 100micrograms/actuation               |
| 11732 | beclometasone extrafine particle cfc free breath actuated inhaler 50micrograms/actuation                |
| 3150  | beclometasone extrafine particle cfc free inhaler 100micrograms/actuation                               |
| 10090 | beclometasone extrafine particle cfc free inhaler 50micrograms/actuation                                |
| 37470 | beclometasone extrafine particle with formoterol cfc free inhaler 100micrograms + 6micrograms/actuation |
| 35652 | beclometasone inhalation powder blisters (refill) 100micrograms                                         |
| 35113 | beclometasone inhalation powder blisters (refill) 200micrograms                                         |
| 35288 | beclometasone inhalation powder blisters (refill) 400micrograms                                         |
| 35580 | beclometasone inhalation powder blisters with device 100micrograms                                      |
| 35293 | beclometasone inhalation powder blisters with device 200micrograms                                      |
| 35107 | beclometasone inhalation powder blisters with device 400micrograms                                      |
| 19401 | beclometasone inhaler with compact spacer 250micrograms/actuation                                       |
| 7964  | beclometasone nebuliser suspension 50micrograms/ml                                                      |
| 15706 | beclometasone vortex metered dose inhaler 100micrograms/actuation                                       |
| 9571  | beclometasone vortex metered dose inhaler 250micrograms/actuation                                       |

|       |                                                                                       |
|-------|---------------------------------------------------------------------------------------|
| 11198 | beclometasone vortex metered dose inhaler 50micrograms/actuation                      |
| 3556  | beclometasone with salbutamol aerosol inhaler 50micrograms + 100micrograms/inhalation |
| 19121 | beclometasone with salbutamol capsules (for inhalation) 100micrograms + 200micrograms |
| 19376 | beclometasone with salbutamol capsules (for inhalation) 200micrograms + 400micrograms |
| 22225 | beclomethasone /salbutamol                                                            |
| 2229  | becodisks disc 100micrograms [a & h]                                                  |
| 883   | becodisks disc 200micrograms [a & h]                                                  |
| 1951  | becodisks disc 400micrograms [a & h]                                                  |
| 35106 | becodisks diskhaler inhalation powder 100micrograms [a & h]                           |
| 35430 | becodisks diskhaler inhalation powder 200micrograms [a & h]                           |
| 35118 | becodisks diskhaler inhalation powder 400micrograms [a & h]                           |
| 35408 | becodisks inhalation powder (refill) 100micrograms [a & h]                            |
| 35071 | becodisks inhalation powder (refill) 200micrograms [a & h]                            |
| 35299 | becodisks inhalation powder (refill) 400micrograms [a & h]                            |
| 20707 | becotide 100                                                                          |
| 99    | becotide 100 aerosol inhaler 100micrograms/actuation [a & h]                          |
| 1258  | becotide 200 aerosol inhaler 200micrograms/actuation [a & h]                          |
| 27525 | becotide 50                                                                           |
| 1406  | becotide 50 aerosol inhaler 50micrograms/actuation [a & h]                            |
| 896   | becotide easi-breathe breath actuated inhaler 100micrograms/actuation [a & h]         |
| 1727  | becotide easi-breathe breath actuated inhaler 50micrograms/actuation [a & h]          |
| 19563 | BECOTIDE FOR NEBULISER                                                                |
| 1269  | becotide nebuliser suspension 50micrograms/ml [a & h]                                 |
| 24219 | becotide rotacaps                                                                     |
| 3947  | becotide rotacaps 100micrograms [a & h]                                               |
| 1537  | becotide rotacaps 200micrograms [a & h]                                               |
| 3075  | becotide rotacaps 400micrograms [a & h]                                               |
| 9356  | becotide rotahaler insufflator [a & h]                                                |
| 3437  | becotide rotahaler type 4 insufflator [a & h]                                         |
| 19736 | becotide susp for nebulisation                                                        |
| 1794  | berotec aerosol inhaler 100micrograms/actuation [boeh ingl]                           |
| 2020  | berotec aerosol inhaler 200micrograms/actuation [boeh ingl]                           |
| 13365 | berotec nebuliser solution 5mg/ml [boeh ingl]                                         |
| 22827 | betamethasone .1 mg pel                                                               |
| 21465 | betamethasone .1 mg tab                                                               |
| 25087 | betamethasone /clioquinol                                                             |
| 24205 | betamethasone /neomycin                                                               |
| 22180 | betamethasone 0.1%/neomycin 0.5% een dro                                              |
| 29322 | betamethasone loz                                                                     |
| 27970 | betamethasone sod phos 0.1%/neomycin 0.5                                              |
| 24660 | betamethasone valerate                                                                |
| 27083 | betamethasone valerate .1 mg tab                                                      |
| 7724  | betamethasone valerate aerosol inhaler 100micrograms/actuation                        |

|       |                                                                      |
|-------|----------------------------------------------------------------------|
| 30805 | betamethasone valerate pel                                           |
| 3065  | bextasol aerosol inhaler [a & h]                                     |
| 10831 | biophylline syrup 125mg/5ml [lorex]                                  |
| 24418 | biophylline tablets 350mg [lorex]                                    |
| 24674 | biophylline tablets 500mg [lorex]                                    |
| 26829 | brelomax tablets 2mg [abbott]                                        |
| 14482 | bricanyl 2.5 mg inj                                                  |
| 235   | bricanyl aerosol inhaler [astrazenec]                                |
| 26987 | bricanyl compound tablets [astrazenec]                               |
| 15483 | bricanyl expectorant [astrazenec]                                    |
| 35744 | bricanyl injection 2.5mg/5ml [astrazenec]                            |
| 35522 | bricanyl injection 500micrograms/1ml [astrazenec]                    |
| 13307 | bricanyl injection 500micrograms/ml [astrazenec]                     |
| 17901 | bricanyl nebule 2.5 ml                                               |
| 2758  | bricanyl refill canister [astrazenec]                                |
| 4222  | bricanyl respirator solution 10mg/ml [astrazenec]                    |
| 3764  | bricanyl respules (5mg/2ml) 2.5 mg/ml inh                            |
| 43085 | bricanyl respules unit dose nebuliser solution 5mg/2ml [astrazenec]  |
| 4541  | bricanyl sa tablets 7.5mg [astrazenec]                               |
| 7954  | bricanyl spacer inhaler [astrazenec]                                 |
| 3584  | bricanyl sugar free oral solution 1.5mg/5ml [astrazenec]             |
| 3534  | bricanyl tablets 5mg [astrazenec]                                    |
| 907   | bricanyl turbohaler 500micrograms [astrazenec]                       |
| 42886 | bricanyl turbohaler dry powder inhaler 500micrograms [astrazenec]    |
| 4640  | bricanyl unit dose nebuliser solution 5mg/2ml [astrazenec]           |
| 12486 | bronchodil aerosol inhaler 500micrograms/dose [viatris]              |
| 25820 | bronchodil elixir 10mg/5ml [viatris]                                 |
| 15075 | bronchodil tablets 20mg [viatris]                                    |
| 35724 | budelin novolizer inhalation powder (refill) 200micrograms [meda]    |
| 35631 | budelin novolizer inhalation powder with device 200micrograms [meda] |
| 8433  | budesonide aerosol inhaler 100micrograms/actuation                   |
| 909   | budesonide aerosol inhaler 200micrograms/actuation                   |
| 14700 | budesonide aerosol inhaler 400micrograms/actuation                   |
| 959   | budesonide aerosol inhaler 50micrograms/actuation                    |
| 10321 | budesonide capsules (for inhalation) 400micrograms                   |
| 39102 | budesonide cfc free inhaler 100micrograms                            |
| 39879 | budesonide cfc free inhaler 200micrograms                            |
| 35602 | budesonide dry powder inhalation cartridge (refill) 200micrograms    |
| 35510 | budesonide dry powder inhalation cartridge with device 200micrograms |
| 7788  | budesonide dry powder inhaler 100micrograms/actuation                |
| 2092  | budesonide dry powder inhaler 200micrograms/actuation                |
| 1642  | budesonide dry powder inhaler 400micrograms/actuation                |
| 4801  | budesonide nebuliser suspension 0.5mg/2ml                            |



|       |                                                                                      |
|-------|--------------------------------------------------------------------------------------|
| 4942  | budesonide nebuliser suspension 1mg/2ml                                              |
| 3570  | budesonide refill canister 200micrograms/actuation                                   |
| 947   | budesonide refill canister 50micrograms/actuation                                    |
| 16054 | budesonide refillable breath actuated dry powder inhaler 200micrograms/actuation     |
| 10218 | budesonide with formoterol dry powder inhaler 100micrograms + 6micrograms/actuation  |
| 6796  | budesonide with formoterol dry powder inhaler 200micrograms + 6micrograms/actuation  |
| 6746  | budesonide with formoterol dry powder inhaler 400micrograms + 12micrograms/actuation |
| 8511  | cam sugar free liquid 4mg/5ml [cambhealth]                                           |
| 27558 | choledyl                                                                             |
| 3187  | choledyl syrup 62.5mg/5ml [parke]                                                    |
| 4591  | choledyl tablets 100mg [parke]                                                       |
| 4592  | choledyl tablets 200mg [parke]                                                       |
| 22669 | choline theophyllinate 270 mg tab                                                    |
| 18988 | choline theophyllinate syrup 62.5mg/5ml                                              |
| 18288 | choline theophyllinate tablets 100mg                                                 |
| 7832  | choline theophyllinate tablets 200mg                                                 |
| 10102 | ciclesonide cfc free inhaler 160micrograms/actuation                                 |
| 7356  | ciclesonide cfc free inhaler 80micrograms/actuation                                  |
| 13290 | clenil modulite cfc free inhaler 100micrograms/actuation [chiesi]                    |
| 16151 | clenil modulite cfc free inhaler 200micrograms/actuation [chiesi]                    |
| 16148 | clenil modulite cfc free inhaler 250micrograms/actuation [chiesi]                    |
| 16158 | clenil modulite cfc free inhaler 50micrograms/actuation [chiesi]                     |
| 19732 | cobutolin inh                                                                        |
| 26873 | cobutolin tablets 2mg [actavis]                                                      |
| 556   | combivent aerosol inhaler 20mcg + 100mcg [boeh ingl]                                 |
| 3305  | combivent udvs nebuliser solution 2.5ml [boeh ingl]                                  |
| 1422  | cromogen aerosol inhaler 5mg/inhalation [ivax]                                       |
| 1728  | cromogen easi-breathe breath actuated inhaler 5mg/inhalation [ivax]                  |
| 22550 | duovent                                                                              |
| 2722  | duovent aerosol inhaler 40micrograms + 100micrograms/actuation [boeh ingl]           |
| 2862  | duovent autohaler breath actuated inhaler [boeh ingl]                                |
| 16207 | duovent udvs nebuliser solution [boeh ingl]                                          |
| 17654 | easyhaler beclometasone dry powder inhaler 200micrograms/actuation [orion]           |
| 17670 | easyhaler budesonide dry powder inhaler 100micrograms/actuation [orion]              |
| 27188 | easyhaler budesonide dry powder inhaler 200micrograms/actuation [orion]              |
| 30649 | easyhaler budesonide dry powder inhaler 400micrograms/actuation [orion]              |
| 35725 | easyhaler formoterol dry powder inhaler 12micrograms/actuation [orion]               |
| 13181 | easyhaler salbutamol dry powder inhaler 100micrograms/actuation [orion]              |
| 16577 | easyhaler salbutamol dry powder inhaler 200micrograms/actuation [orion]              |
| 15561 | ephedrine 11mg/theophylline 120mg 11 mg tab                                          |
| 26420 | exirel 10 mg tab                                                                     |
| 8504  | exirel 15 mg tab                                                                     |
| 12563 | exirel aerosol inhaler [3m]                                                          |

|       |                                                                                                   |
|-------|---------------------------------------------------------------------------------------------------|
| 23787 | exirel capsules 10mg [3m]                                                                         |
| 8012  | exirel capsules 15mg [3m]                                                                         |
| 25821 | exirel syrup 7.5mg/5ml [3m]                                                                       |
| 26744 | expulin decongestant sugar free linctus [shire]                                                   |
| 4842  | fenoterol aerosol inhaler 100micrograms/actuation                                                 |
| 5185  | fenoterol aerosol inhaler 200micrograms/actuation                                                 |
| 15441 | fenoterol hydrobromide .5 % sol                                                                   |
| 8339  | fenoterol hydrobromide complete unit inh                                                          |
| 3786  | fenoterol with ipratropium bromide aerosol inhaler 100micrograms + 40micrograms/actuation         |
| 12808 | fenoterol with ipratropium bromide breath actuated inhaler 100micrograms + 40micrograms/actuation |
| 18299 | fenoterol with ipratropium bromide unit dose nebulising solution 1.25mg + 500micrograms/4ml       |
| 3927  | filair aerosol inhaler 100micrograms/actuation [meda]                                             |
| 3743  | filair aerosol inhaler 50micrograms/actuation [meda]                                              |
| 3993  | filair forte aerosol inhaler 250micrograms/actuation [meda]                                       |
| 4926  | flixtide accuhaler 100micrograms/inhalation [a & h]                                               |
| 911   | flixtide accuhaler 250micrograms/inhalation [a & h]                                               |
| 2440  | flixtide accuhaler 500micrograms/inhalation [a & h]                                               |
| 5580  | flixtide accuhaler 50micrograms/inhalation [a & h]                                                |
| 42928 | flixtide accuhaler dry powder inhaler 100micrograms/inhalation [a & h]                            |
| 42994 | flixtide accuhaler dry powder inhaler 250micrograms/inhalation [a & h]                            |
| 43074 | flixtide accuhaler dry powder inhaler 500micrograms/inhalation [a & h]                            |
| 42985 | flixtide accuhaler dry powder inhaler 50micrograms/inhalation [a & h]                             |
| 1676  | flixtide aerosol inhaler 125micrograms/actuation [a & h]                                          |
| 1412  | flixtide aerosol inhaler 250micrograms/actuation [a & h]                                          |
| 3289  | flixtide aerosol inhaler 25micrograms/actuation [a & h]                                           |
| 1518  | flixtide aerosol inhaler 50micrograms/actuation [a & h]                                           |
| 3989  | flixtide disc 100micrograms [a & h]                                                               |
| 1424  | flixtide disc 250micrograms [a & h]                                                               |
| 1426  | flixtide disc 500micrograms [a & h]                                                               |
| 8635  | flixtide disc 50micrograms [a & h]                                                                |
| 36090 | flixtide diskhaler (refill) inhalation powder 100micrograms [a & h]                               |
| 35611 | flixtide diskhaler (refill) inhalation powder 250micrograms [a & h]                               |
| 35374 | flixtide diskhaler (refill) inhalation powder 500 micrograms [a & h]                              |
| 35986 | flixtide diskhaler (refill) inhalation powder 50micrograms [a & h]                                |
| 35225 | flixtide diskhaler inhalation powder 100micrograms [a & h]                                        |
| 35461 | flixtide diskhaler inhalation powder 250micrograms [a & h]                                        |
| 35392 | flixtide diskhaler inhalation powder 500 micrograms [a & h]                                       |
| 36290 | flixtide diskhaler inhalation powder 50micrograms [a & h]                                         |
| 3988  | flixtide diskhaler-community pack 100 mcg                                                         |
| 3753  | flixtide diskhaler-community pack 250 mcg                                                         |
| 8450  | flixtide diskhaler-community pack 50 mcg                                                          |
| 5718  | flixtide evohaler cfc free inhaler 125micrograms/actuation [a & h]                                |
| 5683  | flixtide evohaler cfc free inhaler 250micrograms/actuation [a & h]                                |

|       |                                                                                        |
|-------|----------------------------------------------------------------------------------------|
| 5309  | flioxotide evohaler cfc free inhaler 50micrograms/actuation [a & h]                    |
| 5551  | flioxotide nebulus unit dose nebulising suspension 500micrograms/2ml [a & h]           |
| 4132  | fluticasone aerosol inhaler 125micrograms/actuation                                    |
| 2951  | fluticasone aerosol inhaler 250micrograms/actuation                                    |
| 2723  | fluticasone aerosol inhaler 25micrograms/actuation                                     |
| 4688  | fluticasone aerosol inhaler 50micrograms/actuation                                     |
| 5975  | fluticasone cfc free inhaler 125micrograms/actuation                                   |
| 5822  | fluticasone cfc free inhaler 250micrograms/actuation                                   |
| 5223  | fluticasone cfc free inhaler 50micrograms/actuation                                    |
| 4131  | fluticasone disc 100micrograms                                                         |
| 7638  | fluticasone disc 250micrograms                                                         |
| 7891  | fluticasone disc 500micrograms                                                         |
| 7602  | fluticasone disc 50micrograms                                                          |
| 5885  | fluticasone dry powder inhaler 100micrograms/inhalation                                |
| 7948  | fluticasone dry powder inhaler 250micrograms/inhalation                                |
| 2282  | fluticasone dry powder inhaler 500micrograms/inhalation                                |
| 9164  | fluticasone dry powder inhaler 50micrograms/inhalation                                 |
| 35772 | fluticasone inhalation powder blisters (refill) 100micrograms                          |
| 35905 | fluticasone inhalation powder blisters (refill) 250micrograms                          |
| 36462 | fluticasone inhalation powder blisters (refill) 500 micrograms                         |
| 37447 | fluticasone inhalation powder blisters (refill) 50micrograms                           |
| 35638 | fluticasone inhalation powder blisters with device 100micrograms                       |
| 36401 | fluticasone inhalation powder blisters with device 250micrograms                       |
| 35700 | fluticasone inhalation powder blisters with device 500 micrograms                      |
| 36021 | fluticasone inhalation powder blisters with device 50micrograms                        |
| 27915 | fluticasone prop disk refill                                                           |
| 11478 | fluticasone unit dose nebulising suspension 2mg/2ml                                    |
| 17465 | fluticasone unit dose nebulising suspension 500micrograms/2ml                          |
| 11588 | fluticasone with salmeterol cfc free inhaler 125micrograms + 25micrograms/actuation    |
| 11618 | fluticasone with salmeterol cfc free inhaler 250micrograms + 25micrograms/actuation    |
| 12994 | fluticasone with salmeterol cfc free inhaler 50micrograms + 25micrograms/actuation     |
| 13273 | fluticasone with salmeterol dry powder inhaler 100micrograms + 50micrograms/inhalation |
| 13040 | fluticasone with salmeterol dry powder inhaler 250micrograms + 50micrograms/inhalation |
| 11410 | fluticasone with salmeterol dry powder inhaler 500micrograms + 50micrograms/inhalation |
| 10968 | foradil capsules (for inhalation) 12mcg [nov/ciba]                                     |
| 6526  | formoterol fumarate capsules (for inhalation) 12mcg                                    |
| 14306 | formoterol fumarate cfc free inhaler 12micrograms/actuation                            |
| 7133  | formoterol fumarate dry powder inhaler 12micrograms/actuation                          |
| 9711  | formoterol fumarate dry powder inhaler 6 micrograms/actuation                          |
| 37432 | fostair cfc free inhaler 100micrograms + 6micrograms/actuation [chiesi]                |
| 7477  | franor plus tablets [sanofi/ave]                                                       |
| 2609  | franor tablets [sanofi s]                                                              |
| 19597 | intal                                                                                  |

|       |                                                                                                                |
|-------|----------------------------------------------------------------------------------------------------------------|
| 24387 | intal                                                                                                          |
| 314   | intal aerosol inhaler [aventis]                                                                                |
| 4100  | intal autohaler 5mg/inhalation [aventis]                                                                       |
| 38501 | intal cfc free inhaler 5mg [sanofi/ave]                                                                        |
| 2610  | intal compound capsules (for inhalation) [rhone]                                                               |
| 7972  | intal fisonair aerosol inhaler 5mg/inhalation [aventis]                                                        |
| 19643 | intal nebuliser solution (2ml)                                                                                 |
| 1629  | intal nebuliser solution 10mg/ml [aventis]                                                                     |
| 28977 | intal spincaps                                                                                                 |
| 1683  | intal spincaps inhalation powder capsules [aventis]                                                            |
| 2260  | intal spinhaler insufflator [aventis]                                                                          |
| 10361 | intal synchroner 5 mg inh                                                                                      |
| 4647  | intal synchroner 5mg/inhalation [aventis]                                                                      |
| 7580  | intal whistle                                                                                                  |
| 35557 | ipramol steri-neb unit dose nebulising solution 500micrograms + 2.5mg/2.5ml [ivax]                             |
| 25020 | ipratropium bromide (forte)                                                                                    |
| 1409  | ipratropium bromide aerosol inhaler 20micrograms/dose                                                          |
| 4268  | ipratropium bromide aerosol inhaler 40micrograms/metered inhalation                                            |
| 6081  | ipratropium bromide breath actuated inhaler 20micrograms/dose                                                  |
| 8333  | ipratropium bromide capsules (for inhalation) 40mcg                                                            |
| 11779 | ipratropium bromide capsules for inhalation + inhaler 40mcg                                                    |
| 6522  | ipratropium bromide cfc free inhaler 20micrograms/actuation                                                    |
| 37791 | ipratropium bromide inhalation solution 250micrograms/ml                                                       |
| 23961 | ipratropium bromide inhalation solution 250micrograms/ml [galen]                                               |
| 20803 | ipratropium bromide nebuliser solution                                                                         |
| 1410  | ipratropium bromide nebuliser solution 0.25mg/ml                                                               |
| 6772  | ipratropium bromide unit dose nebuliser solution 250micrograms/ml                                              |
| 30229 | ipratropium bromide unit dose nebuliser solution 250micrograms/ml [galen]                                      |
| 6719  | ipratropium bromide unit dose nebuliser solution 500micrograms/2ml                                             |
| 1411  | ipratropium bromide unit dose nebulising solution 250micrograms/ml                                             |
| 40177 | ipratropium bromide unit dose nebulising solution 250micrograms/ml [hillcross]                                 |
| 26616 | ipratropium bromide with fenoterol hydrobromide aerosol inhaler 40micrograms + 100micrograms/actuation         |
| 27505 | ipratropium bromide with fenoterol hydrobromide breath actuated inhaler 40micrograms + 100micrograms/actuation |
| 9270  | ipratropium bromide with fenoterol hydrobromide unit dose nebulising solution 500micrograms + 1.25mg/4ml       |
| 2152  | ipratropium bromide with salbutamol aerosol inhaler 20mcg + 100mcg                                             |
| 11046 | ipratropium bromide with salbutamol unit dose nebulising solution 500micrograms + 2.5mg/2.5ml                  |
| 33461 | iso-autohaler aerosol inhaler [3m]                                                                             |
| 42921 | isoprenaline sulphate aerosol inhaler 400micrograms/actuation                                                  |
| 10490 | isoprenaline sulphate aerosol inhaler 80micrograms/actuation                                                   |
| 21769 | lasma tablets 300mg [pharmax]                                                                                  |
| 7935  | maxivent aerosol inhaler 100micrograms/inhalation [ashbourne]                                                  |

|       |                                                                                        |
|-------|----------------------------------------------------------------------------------------|
| 23269 | maxivent steripoule unit dose nebulising solution 2.5mg/2.5ml [ashbourne]              |
| 25339 | maxivent steripoule unit dose nebulising solution 5mg/2.5ml [ashbourne]                |
| 8872  | medihaler -iso aerosol [3m]                                                            |
| 2259  | medihaler -iso forte aerosol inhaler [3m]                                              |
| 28241 | min-i-jet aminophylline injection 250mg/10ml [ucb]                                     |
| 16018 | mometasone furoate dry powder inhaler 200micrograms/actuation                          |
| 10254 | mometasone furoate dry powder inhaler 400micrograms/actuation                          |
| 17874 | monovent syrup 1.5mg/5ml [lagap]                                                       |
| 41832 | monovent syrup 1.5mg/5ml [sandoz]                                                      |
| 622   | montelukast (as sodium salt) chewable tablet 4mg                                       |
| 5957  | montelukast (as sodium salt) chewable tablet 5mg                                       |
| 7088  | montelukast (as sodium salt) granules 4mg/sachet                                       |
| 808   | montelukast (as sodium salt) tablets 10mg                                              |
| 8608  | nedocromil sodium aerosol inhaler 2mg/inhalation                                       |
| 13256 | nedocromil sodium cfc free inhaler 2mg/inhalation                                      |
| 33434 | noradran syrup 7.5mg + 15mg/5ml [norma]                                                |
| 14739 | norphyllin sr tablets 225mg [ivax]                                                     |
| 23741 | novolizer budesonide breath actuated dry powder inhaler 200micrograms/actuation [meda] |
| 10331 | nuelin liquid 60mg/5ml [3m]                                                            |
| 2995  | nuelin sa tablets 175mg [meda]                                                         |
| 5261  | nuelin sa-250 tablets [meda]                                                           |
| 7841  | nuelin tablets 125mg [3m]                                                              |
| 32812 | numotac tablets 10mg [3m]                                                              |
| 461   | orciprenaline aerosol inhaler 750micrograms/inhalation                                 |
| 8151  | orciprenaline aerosol refill 750micrograms/inhalation                                  |
| 32283 | orciprenaline injection 0.5mg/ml                                                       |
| 2490  | orciprenaline sugar free oral solution 10mg/5ml                                        |
| 7943  | orciprenaline tablets 20mg                                                             |
| 31262 | orciprenaline with bromhexine hydrochloride mixture                                    |
| 1974  | oxis 12 turbohaler dry powder inhaler 12micrograms/actuation [astrazenec]              |
| 1975  | oxis 6 turbohaler dry powder inhaler 6 micrograms/actuation [astrazenec]               |
| 2437  | oxitropium bromide aerosol inhaler 100micrograms/actuation                             |
| 9658  | oxitropium bromide breath actuated inhaler 100micrograms/actuation                     |
| 3039  | oxivent aerosol inhaler 100micrograms/actuation [boeh ingl]                            |
| 3850  | oxivent autohaler breath actuated inhaler 100micrograms/actuation [boeh ingl]          |
| 12699 | pecram sustained release tablets 225mg [novartis]                                      |
| 27040 | phyllocontin continus                                                                  |
| 8806  | phyllocontin continus forte tablets 350mg [napppharm]                                  |
| 590   | phyllocontin continus tablets 225mg [napppharm]                                        |
| 39040 | phyllocontin forte continus tablets 350mg [napppharm]                                  |
| 180   | phyllocontin sup                                                                       |
| 12463 | pirbuterol 15 mg tab                                                                   |
| 16236 | pirbuterol acetate aerosol inhaler                                                     |

|       |                                                                                         |
|-------|-----------------------------------------------------------------------------------------|
| 22661 | pirbuterol capsules 10mg                                                                |
| 8252  | pirbuterol capsules 15mg                                                                |
| 25829 | pirbuterol syrup 7.5mg/5ml                                                              |
| 11993 | pro-vent capsules 300mg [wellcome]                                                      |
| 3758  | pulmadil aerosol inhaler [3m]                                                           |
| 10858 | pulmadil auto aerosol inhaler [3m]                                                      |
| 27583 | pulmicort                                                                               |
| 454   | pulmicort aerosol inhaler 200micrograms [astrazenec]                                    |
| 39099 | pulmicort cfc free inhaler 100micrograms [astrazenec]                                   |
| 40057 | pulmicort cfc free inhaler 200micrograms [astrazenec]                                   |
| 26665 | pulmicort complete                                                                      |
| 3442  | pulmicort complete 200 mcg inh                                                          |
| 3188  | pulmicort complete 50 mcg inh                                                           |
| 23675 | pulmicort l.s. refill                                                                   |
| 1680  | pulmicort ls aerosol inhaler 50micrograms [astrazenec]                                  |
| 4545  | pulmicort ls refill canister 50micrograms [astrazenec]                                  |
| 2124  | pulmicort refill 200 mcg inh                                                            |
| 8251  | pulmicort refill 50 mg inh                                                              |
| 20812 | pulmicort refill                                                                        |
| 2125  | pulmicort refill canister 200micrograms [astrazenec]                                    |
| 1959  | pulmicort respules nebuliser suspension 0.5mg/2ml [astrazenec]                          |
| 1956  | pulmicort respules nebuliser suspension 1mg/2ml [astrazenec]                            |
| 960   | pulmicort turbohaler dry powder inhaler 100micrograms/actuation [astrazenec]            |
| 956   | pulmicort turbohaler dry powder inhaler 200micrograms/actuation [astrazenec]            |
| 908   | pulmicort turbohaler dry powder inhaler 400micrograms/actuation [astrazenec]            |
| 14757 | pulvinal beclometasone dipropionate dry powder inhaler 100micrograms/actuation [chiesi] |
| 13037 | pulvinal beclometasone dipropionate dry powder inhaler 200micrograms/actuation [chiesi] |
| 14736 | pulvinal beclometasone dipropionate dry powder inhaler 400micrograms/actuation [chiesi] |
| 13038 | pulvinal salbutamol dry powder inhaler 200micrograms/actuation [chiesi]                 |
| 4413  | qvar autohaler cfc free breath actuated inhaler 100micrograms/actuation [ivax]          |
| 3220  | qvar autohaler cfc free breath actuated inhaler 50micrograms/actuation [ivax]           |
| 2335  | qvar cfc free inhaler 100micrograms/actuation [ivax]                                    |
| 3546  | qvar cfc free inhaler 50micrograms/actuation [ivax]                                     |
| 18848 | qvar easi-breathe cfc free breath actuated inhaler 100micrograms/actuation [ivax]       |
| 14294 | qvar easi-breathe cfc free breath actuated inhaler 50micrograms/actuation [ivax]        |
| 15165 | reproterol aerosol inhaler 500micrograms/dose                                           |
| 36677 | reproterol elixir 10mg/5ml                                                              |
| 22790 | reproterol respirator solution 10mg/ml                                                  |
| 22663 | respacal tablets 2mg [ucb]                                                              |
| 18421 | respontin nebules unit dose nebulising solution 250micrograms/ml [glaxo]                |
| 23567 | respontin nebules unit dose nebulising solution 250micrograms/ml [glaxo]                |
| 18140 | respontin nebules unit dose nebulising solution 500micrograms/2ml [glaxo]               |
| 8572  | rimiterol aerosol inhaler                                                               |

|       |                                                                                          |
|-------|------------------------------------------------------------------------------------------|
| 18937 | sabidal sr 270 270 mg tab                                                                |
| 1093  | salamol aerosol inhaler 100micrograms/actuation [ivax]                                   |
| 5170  | salamol cfc free inhaler 100micrograms/inhalation [ivax]                                 |
| 5889  | salamol cfc free inhaler 100micrograms/inhalation [kent]                                 |
| 13996 | salamol cfc free inhaler 100micrograms/inhalation [sandoz]                               |
| 957   | salamol easi-breathe breath actuated inhaler 100micrograms/actuation [ivax]              |
| 5516  | salamol easi-breathe cfc free breath actuated inhaler 100micrograms/actuation [ivax]     |
| 5898  | salamol steri-neb unit dose nebulising solution 2.5mg/2.5ml [numark]                     |
| 5837  | salamol steri-neb unit dose nebulising solution 5mg/2.5ml [numark]                       |
| 31845 | salapin syrup 2mg/5ml [pinewood]                                                         |
| 18622 | Salbulin 2mg Tablet (3M Health Care Ltd)                                                 |
| 862   | salbulin aerosol inhaler [3m]                                                            |
| 31290 | salbulin cfc free                                                                        |
| 4665  | salbulin cfc free inhaler 100micrograms/actuation [3m]                                   |
| 38226 | salbulin mdpi novolizer dry powder inhalation cartridge (refill) 100micrograms [meda]    |
| 38136 | salbulin mdpi novolizer dry powder inhalation cartridge with device 100micrograms [meda] |
| 4055  | salbulin syrup 2mg/5ml [3m]                                                              |
| 3254  | salbulin tablets 4mg [3m]                                                                |
| 25073 | salbutamol                                                                               |
| 10958 | salbutamol .25 mg inj                                                                    |
| 2395  | salbutamol 2 mg/5ml syr                                                                  |
| 3838  | salbutamol 400mcg/beclometh.100mcg r/cap inh                                             |
| 8     | salbutamol aerosol inhaler 100micrograms/inhalation                                      |
| 34311 | salbutamol aerosol inhaler 100micrograms/inhalation [berk]                               |
| 44713 | salbutamol aerosol inhaler 100micrograms/inhalation [celltech]                           |
| 34702 | salbutamol aerosol inhaler 100micrograms/inhalation [cp pharm]                           |
| 33588 | salbutamol aerosol inhaler 100micrograms/inhalation [gen (uk)]                           |
| 31933 | salbutamol aerosol inhaler 100micrograms/inhalation [hillcross]                          |
| 28508 | salbutamol aerosol inhaler 100micrograms/inhalation [ivax]                               |
| 33089 | salbutamol aerosol inhaler 100micrograms/inhalation [kent]                               |
| 1698  | salbutamol breath actuated inhaler 100micrograms/actuation                               |
| 30230 | salbutamol breath actuated inhaler 100micrograms/actuation                               |
| 882   | salbutamol capsules (for inhalation) 200micrograms                                       |
| 30204 | salbutamol capsules (for inhalation) 200micrograms                                       |
| 2850  | salbutamol capsules (for inhalation) 400micrograms                                       |
| 34029 | salbutamol capsules (for inhalation) 400micrograms                                       |
| 1741  | salbutamol cfc free breath actuated inhaler 100micrograms/actuation                      |
| 17    | salbutamol cfc free inhaler 100micrograms/inhalation                                     |
| 33817 | salbutamol cfc free inhaler 100micrograms/inhalation [actavis]                           |
| 30118 | salbutamol cfc free inhaler 100micrograms/inhalation [aps]                               |
| 34310 | salbutamol cfc free inhaler 100micrograms/inhalation [hillcross]                         |
| 34619 | salbutamol cfc free inhaler 100micrograms/inhalation [kent]                              |
| 46551 | salbutamol cfc free inhaler 100micrograms/inhalation [neolab]                            |

|       |                                                                      |
|-------|----------------------------------------------------------------------|
| 25218 | salbutamol cfc/free b/a                                              |
| 18968 | salbutamol concentrate for solution for infusion 5mg/5ml             |
| 38097 | salbutamol cyclocaps 200micrograms [du pont]                         |
| 38416 | salbutamol cyclocaps 400micrograms [du pont]                         |
| 33373 | salbutamol cyclocaps capsules (for inhalation) 200micrograms [teva]  |
| 32050 | salbutamol cyclocaps capsules (for inhalation) 400micrograms [teva]  |
| 30212 | salbutamol cyclohaler                                                |
| 27793 | salbutamol cyclohaler type 5 insufflator [bms]                       |
| 3163  | salbutamol disc 200micrograms                                        |
| 5753  | salbutamol disc 400micrograms                                        |
| 38214 | salbutamol dry powder inhalation cartridge (refill) 100micrograms    |
| 38079 | salbutamol dry powder inhalation cartridge with device 100micrograms |
| 7017  | salbutamol dry powder inhaler 100micrograms/actuation                |
| 2978  | salbutamol dry powder inhaler 200micrograms/actuation                |
| 6462  | salbutamol dry powder inhaler 95micrograms                           |
| 9805  | salbutamol infusion 100micrograms/ml                                 |
| 22512 | salbutamol inhaler                                                   |
| 1346  | salbutamol injection 0.05mg/ml                                       |
| 15613 | salbutamol injection 500micrograms/1ml                               |
| 9384  | salbutamol modified release capsules 4mg                             |
| 696   | salbutamol modified release capsules 8mg                             |
| 3994  | salbutamol modified release tablet 4mg                               |
| 2869  | salbutamol modified release tablet 8mg                               |
| 22467 | salbutamol respirator soln                                           |
| 7965  | salbutamol respirator solution 5mg/ml                                |
| 20675 | salbutamol rotahaler complete unit                                   |
| 3443  | salbutamol spacehaler 100micrograms/inhalation [celltech]            |
| 28881 | salbutamol sugar free oral solution [hillcross]                      |
| 282   | salbutamol sugar free oral solution 2mg/5ml                          |
| 41691 | salbutamol sugar free oral solution 2mg/5ml [sandoz]                 |
| 21102 | salbutamol sugar free syrup 2mg/5ml [lagap]                          |
| 881   | salbutamol tablets 2mg                                               |
| 34618 | salbutamol tablets 2mg [actavis]                                     |
| 41548 | salbutamol tablets 2mg [aps]                                         |
| 41549 | salbutamol tablets 2mg [cp pharm]                                    |
| 860   | salbutamol tablets 4mg                                               |
| 34938 | salbutamol tablets 4mg [actavis]                                     |
| 32102 | salbutamol tablets 4mg [hillcross]                                   |
| 42497 | salbutamol tablets 8mg                                               |
| 20781 | salbutamol u.dose nebulising 2.5mg/2.5ml                             |
| 1630  | salbutamol unit dose nebulising solution 2.5mg/2.5ml                 |
| 34162 | salbutamol unit dose nebulising solution 2.5mg/2.5ml [galen]         |
| 40709 | salbutamol unit dose nebulising solution 2.5mg/2.5ml [hillcross]     |



|       |                                                                                               |
|-------|-----------------------------------------------------------------------------------------------|
| 1711  | salbutamol unit dose nebulising solution 5mg/2.5ml                                            |
| 34018 | salbutamol unit dose nebulising solution 5mg/2.5ml [galen]                                    |
| 45863 | salbutamol unit dose nebulising solution 5mg/2.5ml [gen (uk)]                                 |
| 14525 | salbutamol vortex metered dose inhaler 100micrograms/inhalation                               |
| 11307 | salbutamol with beclometasone aerosol inhaler 100mcg + 50mcg                                  |
| 18456 | salbutamol with beclometasone capsules (for inhalation) 200micrograms + 100micrograms         |
| 14561 | salbutamol with beclometasone capsules (for inhalation) 400micrograms + 200micrograms         |
| 12909 | salbutamol with ipratropium bromide aerosol inhaler 100micrograms + 20micrograms/actuation    |
| 12822 | salbutamol with ipratropium bromide unit dose nebulising solution 2.5mg + 500micrograms/2.5ml |
| 40655 | salbuvent aerosol inhaler 100micrograms/actuation [pharmacia]                                 |
| 3189  | salbuvent inh inh                                                                             |
| 27340 | salbuvent injection 0.5mg/ml [pharmacia]                                                      |
| 31082 | salbuvent respirator solution 5mg/ml [pharmacia]                                              |
| 10353 | salbuvent rondo                                                                               |
| 1635  | salbuvent syrup 2mg/5ml [pharmacia]                                                           |
| 20838 | salbuvent tablets 2mg [pharmacia]                                                             |
| 29267 | salbuvent tablets 4mg [pharmacia]                                                             |
| 43046 | salipraneb unit dose nebulising solution 500micrograms + 2.5mg/2.5ml [breath]                 |
| 465   | salmeterol aerosol inhaler 25micrograms/actuation                                             |
| 7270  | salmeterol cfc free inhaler 25micrograms/actuation                                            |
| 3297  | salmeterol disc 50micrograms                                                                  |
| 719   | salmeterol dry powder inhaler 50micrograms/actuation                                          |
| 35503 | salmeterol inhalation powder blisters (refill) 50micrograms                                   |
| 35542 | salmeterol inhalation powder blisters with device 50micrograms                                |
| 6569  | salmeterol with fluticasone cfc free inhaler 25micrograms + 125micrograms/actuation           |
| 5864  | salmeterol with fluticasone cfc free inhaler 25micrograms + 250micrograms/actuation           |
| 6616  | salmeterol with fluticasone cfc free inhaler 25micrograms + 50micrograms/actuation            |
| 6938  | salmeterol with fluticasone dry powder inhaler 50micrograms + 100micrograms/inhalation        |
| 5942  | salmeterol with fluticasone dry powder inhaler 50micrograms + 250micrograms/inhalation        |
| 5558  | salmeterol with fluticasone dry powder inhaler 50micrograms+ 500micrograms/inhalation         |
| 665   | seretide 100 accuhaler dry powder inhaler [glaxo]                                             |
| 5161  | seretide 125 evohaler cfc free inhaler [a & h]                                                |
| 638   | seretide 250 accuhaler dry powder inhaler [glaxo]                                             |
| 5172  | seretide 250 evohaler cfc free inhaler [a & h]                                                |
| 5143  | seretide 50 evohaler cfc free inhaler [a & h]                                                 |
| 3666  | seretide 500 accuhaler dry powder inhaler [glaxo]                                             |
| 2224  | serevent accuhaler 50micrograms/actuation [glaxo]                                             |
| 549   | serevent aerosol inhaler 25micrograms/actuation [glaxo]                                       |
| 35825 | serevent diskhaler (refill) inhalation powder 50micrograms [glaxo]                            |
| 910   | serevent diskhaler 50micrograms [glaxo]                                                       |
| 35165 | serevent diskhaler inhalation powder 50micrograms [glaxo]                                     |
| 7268  | serevent evohaler cfc free inhaler 25micrograms/actuation [glaxo]                             |
| 695   | singulair tablets 10mg [m s d]                                                                |

|       |                                                                                             |
|-------|---------------------------------------------------------------------------------------------|
| 863   | slo-phyllin capsules 125mg [lipha]                                                          |
| 15284 | slo-phyllin capsules 125mg [merck ser]                                                      |
| 2757  | slo-phyllin capsules 250mg [lipha]                                                          |
| 6315  | slo-phyllin capsules 250mg [merck ser]                                                      |
| 1097  | slo-phyllin capsules 60mg [lipha]                                                           |
| 11719 | slo-phyllin capsules 60mg [merck ser]                                                       |
| 37615 | sodium cromoglicate aerosol inhaler 1mg/inhalation                                          |
| 964   | sodium cromoglicate aerosol inhaler 5mg/inhalation                                          |
| 2158  | sodium cromoglicate breath actuated inhaler 5mg/inhalation                                  |
| 2911  | sodium cromoglicate capsules (for inhalation) 20mg                                          |
| 38471 | sodium cromoglicate cfc free inhaler 5mg                                                    |
| 14603 | sodium cromoglicate inhaler and spacer 5mg/actuation                                        |
| 15765 | sodium cromoglicate inhaler and spacer 5mg/inhalation                                       |
| 8498  | sodium cromoglicate nebuliser solution 10mg/ml                                              |
| 20180 | sodium cromoglicate with isoprenaline capsules (for inhalation)                             |
| 8267  | sodium cromoglicate with salbutamol aerosol inhaler                                         |
| 24380 | sodium cromoglicate with salbutamol inhaler and spacer                                      |
| 24898 | spacehaler bdp spacehaler 100micrograms/actuation [celltech]                                |
| 20825 | spacehaler bdp spacehaler 250micrograms/actuation [celltech]                                |
| 28761 | spacehaler bdp spacehaler 50micrograms/actuation [celltech]                                 |
| 22430 | spacehaler salbutamol spacehaler 100micrograms/inhalation [celltech]                        |
| 6050  | spiriva capsules (for inhalation) 18 micrograms [boeh ingl]                                 |
| 35000 | spiriva inhalation powder capsules (refill) 18 micrograms [boeh ingl]                       |
| 34995 | spiriva inhalation powder capsules with device 18 micrograms [boeh ingl]                    |
| 36869 | spiriva respimat inhalation solution 2.5 micrograms/actuation [boeh ingl]                   |
| 3585  | steri-neb cromogen nebuliser solution 10mg/ml [ivax]                                        |
| 1415  | steri-neb ipratropium unit dose nebulising solution 250micrograms/ml [ivax]                 |
| 6758  | steri-neb ipratropium unit dose nebulising solution 250micrograms/ml [ivax]                 |
| 23709 | steri-neb ipratropium unit dose nebulising solution 500micrograms/2ml [ivax]                |
| 2149  | steri-neb salamol 2.5 mg inh                                                                |
| 4634  | steri-neb salamol unit dose nebulising solution 2.5mg/2.5ml [ivax]                          |
| 1414  | steri-neb salamol unit dose nebulising solution 5mg/2.5ml [ivax]                            |
| 40637 | steripoule ipratropium unit dose nebuliser solution 250micrograms/ml [galen]                |
| 40832 | steripoule ipratropium unit dose nebuliser solution 500micrograms/2ml [galen]               |
| 42279 | steripoule salbutamol unit dose nebuliser solution 2.5mg/2.5ml [galen]                      |
| 40599 | steripoule salbutamol unit dose nebuliser solution 5mg/2.5ml [galen]                        |
| 7013  | symbicort turbohaler dry powder inhaler 100micrograms + 6micrograms/actuation [astrazenec]  |
| 6325  | symbicort turbohaler dry powder inhaler 200micrograms + 6micrograms/actuation [astrazenec]  |
| 6780  | symbicort turbohaler dry powder inhaler 400micrograms + 12micrograms/actuation [astrazenec] |
| 27944 | tedral elixir [parke]                                                                       |
| 12274 | tedral tablets [parke]                                                                      |
| 1620  | terbutaline aerosol inhaler 250micrograms/actuation                                         |
| 1619  | terbutaline dry powder inhaler 500micrograms                                                |

|       |                                                                |
|-------|----------------------------------------------------------------|
| 35861 | terbutaline injection 2.5mg/5ml                                |
| 35862 | terbutaline injection 500micrograms/1ml                        |
| 14483 | terbutaline injection 500micrograms/ml                         |
| 8522  | terbutaline modified release tablet 7.5mg                      |
| 1628  | terbutaline refill canister 250micrograms/actuation            |
| 8676  | terbutaline respirator solution 10mg/ml                        |
| 3763  | terbutaline respules inh                                       |
| 7711  | terbutaline spacer inhaler 250micrograms/actuation             |
| 7953  | terbutaline sugar free oral solution 1.5mg/5ml                 |
| 38419 | terbutaline syrup 1.5mg/5ml [hillcross]                        |
| 42867 | terbutaline syrup 1.5mg/5ml [sandoz]                           |
| 10825 | terbutaline tablets 5mg                                        |
| 5308  | terbutaline unit dose nebuliser solution 5mg/2ml               |
| 37612 | terbutaline unit dose nebulising solution 2.5mg/ml [galen]     |
| 17875 | terbutaline with guaifenesin expectorant                       |
| 7731  | theo-dur tablets 200mg [astrazenec]                            |
| 7730  | theo-dur tablets 300mg [astrazenec]                            |
| 1832  | theograd tablets 350mg [abbott]                                |
| 8955  | theophylline 100 mg tab                                        |
| 32893 | theophylline 100mg/lysine 74mg mg tab                          |
| 273   | theophylline 200 mg cap                                        |
| 15409 | theophylline 3 mg sol                                          |
| 10432 | theophylline 300 mg sup                                        |
| 10744 | theophylline 80 mg eli                                         |
| 10433 | theophylline liquid 60mg/5ml                                   |
| 879   | theophylline modified release capsules 125mg                   |
| 2147  | theophylline modified release capsules 250mg                   |
| 12240 | theophylline modified release capsules 300mg                   |
| 880   | theophylline modified release capsules 60mg                    |
| 3388  | theophylline modified release tablet 175mg                     |
| 1833  | theophylline modified release tablet 200mg                     |
| 7733  | theophylline modified release tablet 250mg                     |
| 7732  | theophylline modified release tablet 300mg                     |
| 9092  | theophylline modified release tablet 350mg                     |
| 1834  | theophylline modified release tablet 400mg                     |
| 38120 | theophylline modified release tablet 500mg                     |
| 15365 | theophylline sugar free elixir 10mg/5ml                        |
| 10723 | theophylline syrup 125mg/5ml                                   |
| 4593  | theophylline tablets 125mg                                     |
| 19953 | theophylline with ephedrine and caffeine tablets               |
| 15153 | theophylline with ephedrine hydrochloride tablets 120mg + 11mg |
| 26860 | theophylline with ephedrine sulphate tablets 120mg + 15mg      |
| 20817 | tilade aerosol                                                 |

|       |                                                                               |
|-------|-------------------------------------------------------------------------------|
| 8215  | tilade aerosol inhaler 2mg/inhalation [sanofi/ave]                            |
| 25119 | tilade cfc free inhaler 2mg/inhalation [sanofi/ave]                           |
| 3688  | tilade mint inhaler 2mg/inhalation [sanofi/ave]                               |
| 10597 | tilade mint syncroner 2mg/inhalation [sanofi/ave]                             |
| 746   | tiotropium capsules (for inhalation) 18 micrograms                            |
| 35011 | tiotropium inhalation powder capsules (refill) 18 micrograms                  |
| 35014 | tiotropium inhalation powder capsules with device 18 micrograms               |
| 36864 | tiotropium inhalation solution 2.5 micrograms/actuation                       |
| 42103 | tulobuterol sugar free syrup 1mg/5ml                                          |
| 19799 | tulobuterol tablets 2mg                                                       |
| 19735 | uniphyllin continus                                                           |
| 31758 | uniphyllin continus                                                           |
| 1423  | uniphyllin continus prolonged release tablet 200mg [napppharm]                |
| 5941  | uniphyllin continus prolonged release tablet 300mg [napppharm]                |
| 5453  | uniphyllin continus prolonged release tablet 400mg [napppharm]                |
| 1801  | ventide aerosol inhaler [a & h]                                               |
| 16625 | ventide rotacaps [a & h]                                                      |
| 17696 | ventmax sr modified release capsules 4mg [opus]                               |
| 22313 | ventmax sr modified release capsules 8mg [opus]                               |
| 1882  | ventodisks disc 200micrograms/blister [a & h]                                 |
| 1950  | ventodisks disc 400micrograms/blister [a & h]                                 |
| 26525 | ventolin                                                                      |
| 27573 | ventolin                                                                      |
| 7452  | ventolin .25 mg inj                                                           |
| 4497  | ventolin accuhaler 200micrograms/actuation [glaxo]                            |
| 42858 | ventolin accuhaler dry powder inhaler 200micrograms/actuation [glaxo]         |
| 31    | ventolin aerosol inhaler 100micrograms/inhalation [glaxo]                     |
| 24645 | ventolin concentrate for solution for infusion 5mg/5ml [a & h]                |
| 10458 | ventolin cr tablets 4mg [a & h]                                               |
| 12042 | ventolin cr tablets 8mg [a & h]                                               |
| 958   | ventolin easi-breathe breath actuated inhaler 100micrograms/actuation [a & h] |
| 898   | ventolin evohaler 100micrograms/inhalation [glaxo]                            |
| 42830 | ventolin evohaler cfc free inhaler 100micrograms/inhalation [glaxo]           |
| 8429  | ventolin i/v 5 mg inj                                                         |
| 17185 | ventolin injection 500micrograms/1ml [a & h]                                  |
| 28577 | ventolin injection 50micrograms/ml [a & h]                                    |
| 19642 | ventolin nebules                                                              |
| 674   | ventolin nebules unit dose nebulising solution 2.5mg [a & h]                  |
| 1957  | ventolin nebules unit dose nebulising solution 5mg [a & h]                    |
| 19653 | ventolin respirator                                                           |
| 510   | ventolin respirator solution 5mg/ml [a & h]                                   |
| 23688 | ventolin rotacaps                                                             |
| 2851  | ventolin rotacaps 200micrograms [a & h]                                       |

|       |                                                                                                           |
|-------|-----------------------------------------------------------------------------------------------------------|
| 1952  | ventolin rotacaps 400micrograms [a & h]                                                                   |
| 19649 | ventolin rotahaler                                                                                        |
| 4908  | ventolin rotahaler insufflator [a & h]                                                                    |
| 19726 | ventolin s/r                                                                                              |
| 8636  | ventolin s/r 8 mg spa                                                                                     |
| 856   | ventolin syrup 2mg/5ml [a & h]                                                                            |
| 4171  | ventolin tablets 2mg [a & h]                                                                              |
| 987   | ventolin tablets 4mg [a & h]                                                                              |
| 1961  | volmax tablets 4mg [a & h]                                                                                |
| 1960  | volmax tablets 8mg [a & h]                                                                                |
| 17701 | zafirlukast                                                                                               |
| 7132  | zafirlukast tablets 20mg                                                                                  |
| 58269 | AirSalb 100micrograms/dose inhaler CFC free (Sandoz Ltd)                                                  |
| 50018 | Aminophylline 250mg/10ml solution for injection ampoules                                                  |
| 57228 | Aminophylline 250mg/10ml solution for injection ampoules (A A H Pharmaceuticals Ltd)                      |
| 58600 | Aminophylline 250mg/10ml solution for injection ampoules (AMCo)                                           |
| 61346 | Aminophylline 360mg suppositories (Special Order)                                                         |
| 57249 | Asmavent 100micrograms/dose inhaler CFC free (Kent Pharmaceuticals Ltd)                                   |
| 50810 | Atrovent 20micrograms/dose inhaler CFC free (DE Pharmaceuticals)                                          |
| 57557 | Atrovent 20micrograms/dose inhaler CFC free (Lexon (UK) Ltd)                                              |
| 60920 | Atrovent 20micrograms/dose inhaler CFC free (Sigma Pharmaceuticals Plc)                                   |
| 55132 | Atrovent 500micrograms/2ml nebuliser liquid UDV's (Waymade Healthcare Plc)                                |
| 47943 | Beclazone easi-breathe (roi) 100microgram/actuation Pressurised inhalation (Ivax Pharmaceuticals Ireland) |
| 57589 | Becloforte 250micrograms/dose inhaler (Dowelhurst Ltd)                                                    |
| 62030 | Beclometasone 100micrograms/dose / Formoterol 6micrograms/dose dry powder inhaler                         |
| 62518 | Beclometasone 100micrograms/dose inhaler CFC free (Ennogen Healthcare Ltd)                                |
| 63585 | Beclometasone 50micrograms/dose inhaler (Almus Pharmaceuticals Ltd)                                       |
| 56471 | Becodisks 200microgram (Mawdsley-Brooks & Company Ltd)                                                    |
| 56462 | Becodisks 400microgram (Waymade Healthcare Plc)                                                           |
| 62341 | Becotide 50 inhaler (Dowelhurst Ltd)                                                                      |
| 50701 | Becotide Rotahaler (GlaxoSmithKline UK Ltd)                                                               |
| 32533 | BRONTISOL INH                                                                                             |
| 18537 | Budesonide 200microgram inhalation powder capsules                                                        |
| 61975 | Budesonide 500micrograms/2ml nebuliser liquid unit dose vials (Almus Pharmaceuticals Ltd)                 |
| 32461 | CHOLINE THEOPHYLLINATE 90 MG TAB                                                                          |
| 48340 | Clenil Modulite 100micrograms/dose inhaler (Mawdsley-Brooks & Company Ltd)                                |
| 49412 | Clenil Modulite 200micrograms/dose inhaler (Mawdsley-Brooks & Company Ltd)                                |
| 49367 | Clenil Modulite 50micrograms/dose inhaler (Mawdsley-Brooks & Company Ltd)                                 |
| 51903 | Combivent nebuliser liquid 2.5ml UDV's (DE Pharmaceuticals)                                               |
| 49904 | Combivent nebuliser liquid 2.5ml UDV's (Lexon (UK) Ltd)                                                   |
| 25674 | CROMOGEN STERI-NEB 10 MG/ML SOL                                                                           |
| 61782 | DuoResp Spiromax 160micrograms/dose / 4.5micrograms/dose dry powder inhaler (Teva UK Ltd)                 |

|       |                                                                                                    |
|-------|----------------------------------------------------------------------------------------------------|
| 61666 | DuoResp Spiromax 320micrograms/dose / 9micrograms/dose dry powder inhaler (Teva UK Ltd)            |
| 56477 | Flixotide 100micrograms/dose Accuhaler (Waymade Healthcare Plc)                                    |
| 56474 | Flixotide 125micrograms/dose Evohaler (DE Pharmaceuticals)                                         |
| 57555 | Flixotide 125micrograms/dose Evohaler (Dowelhurst Ltd)                                             |
| 57525 | Flixotide 250micrograms/dose Accuhaler (Stephar (U.K.) Ltd)                                        |
| 56484 | Flixotide 250micrograms/dose Accuhaler (Waymade Healthcare Plc)                                    |
| 51815 | Flixotide 250micrograms/dose Evohaler (Waymade Healthcare Plc)                                     |
| 16305 | Flixotide 2mg/2ml Nebules (GlaxoSmithKline UK Ltd)                                                 |
| 56499 | Flixotide 500micrograms/dose Accuhaler (Waymade Healthcare Plc)                                    |
| 57579 | Flixotide 50micrograms/dose Accuhaler (DE Pharmaceuticals)                                         |
| 56475 | Flixotide 50micrograms/dose Accuhaler (Sigma Pharmaceuticals Plc)                                  |
| 53057 | Flixotide 50micrograms/dose Evohaler (Lexon (UK) Ltd)                                              |
| 51209 | Fluticasone 125micrograms/dose / Formoterol 5micrograms/dose inhaler CFC free                      |
| 49868 | Fluticasone 250micrograms/dose / Formoterol 10micrograms/dose inhaler CFC free                     |
| 49772 | Fluticasone 250micrograms/dose Evohaler (Sigma Pharmaceuticals Plc)                                |
| 51270 | Fluticasone 50micrograms/dose / Formoterol 5micrograms/dose inhaler CFC free                       |
| 59899 | Fluticasone furoate 184micrograms/dose / Vilanterol 22micrograms/dose dry powder inhaler           |
| 59439 | Fluticasone furoate 92micrograms/dose / Vilanterol 22micrograms/dose dry powder inhaler            |
| 50036 | Flutiform 125micrograms/dose / 5micrograms/dose inhaler (Napp Pharmaceuticals Ltd)                 |
| 48666 | Flutiform 250micrograms/dose / 10micrograms/dose inhaler (Napp Pharmaceuticals Ltd)                |
| 50689 | Flutiform 50micrograms/dose / 5micrograms/dose inhaler (Napp Pharmaceuticals Ltd)                  |
| 61644 | Fostair NEXThaler 100micrograms/dose / 6micrograms/dose dry powder inhaler (Chiesi Ltd)            |
| 53174 | Ipratropium bromide 500micrograms/2ml nebuliser liquid unit dose vials (A A H Pharmaceuticals Ltd) |
| 32222 | Isoprenaline hc 500micrograms + 50micrograms/metered Pressurised inhalation                        |
| 28614 | ISOPRENALINE SULPHATE COMPLETE UNIT INH                                                            |
| 31570 | ISOPRENALINE SULPHATE REFILL VIAL INH                                                              |
| 54641 | Isoprenaline sulphate with sodium cromoglicate inhalation Capsule                                  |
| 31354 | ISOPRENALINE/PHENYLEPHRINE 400-DOSE COMP INH                                                       |
| 41830 | Medihaler -duo Inhalation powder (3M Health Care Ltd)                                              |
| 20824 | MEDIHALER-DUO INH                                                                                  |
| 23385 | MEDIHALER-EPI                                                                                      |
| 21875 | MEDIHALER-ISO                                                                                      |
| 20673 | MEDIHALER-ISO FORTE                                                                                |
| 62490 | Montelukast 10mg tablets (A A H Pharmaceuticals Ltd)                                               |
| 59819 | Montelukast 10mg tablets (Actavis UK Ltd)                                                          |
| 62410 | Montelukast 10mg tablets (Alliance Healthcare (Distribution) Ltd)                                  |
| 60331 | Montelukast 10mg tablets (Ranbaxy (UK) Ltd)                                                        |
| 59263 | Montelukast 10mg tablets (Teva UK Ltd)                                                             |
| 56604 | Montelukast 4mg chewable tablets sugar free (Actavis UK Ltd)                                       |
| 56756 | Montelukast 4mg granules sachets sugar free (A A H Pharmaceuticals Ltd)                            |
| 63457 | Montelukast 5mg chewable tablets sugar free (Accord Healthcare Ltd)                                |
| 59968 | Montelukast 5mg chewable tablets sugar free (Teva UK Ltd)                                          |
| 59898 | Nedocromil 2mg/dose inhaler                                                                        |

|       |                                                                                                        |
|-------|--------------------------------------------------------------------------------------------------------|
| 63644 | Nedocromil 2mg/dose inhaler with spacer                                                                |
| 47638 | Neovent 25micrograms/dose inhaler CFC free (Kent Pharmaceuticals Ltd)                                  |
| 15413 | ORCIPRENALINE SULPHATE 5 % SOL                                                                         |
| 56482 | Oxis 12 Turbohaler (Waymade Healthcare Plc)                                                            |
| 57558 | Oxis 6 Turbohaler (Lexon (UK) Ltd)                                                                     |
| 52732 | Pulmicort 0.5mg Respules (Necessity Supplies Ltd)                                                      |
| 50037 | Pulmicort 0.5mg Respules (Waymade Healthcare Plc)                                                      |
| 60937 | Pulmicort 200 Turbohaler (Dowelhurst Ltd)                                                              |
| 56498 | Pulmicort 200 Turbohaler (Waymade Healthcare Plc)                                                      |
| 49711 | Pulmicort 200micrograms/dose inhaler (AstraZeneca UK Ltd)                                              |
| 51480 | Qvar 100 Autohaler (DE Pharmaceuticals)                                                                |
| 52806 | Qvar 100 Autohaler (Lexon (UK) Ltd)                                                                    |
| 54399 | Qvar 100 Autohaler (Sigma Pharmaceuticals Plc)                                                         |
| 53480 | Qvar 100 Autohaler (Stephar (U.K.) Ltd)                                                                |
| 50287 | Qvar 100 inhaler (DE Pharmaceuticals)                                                                  |
| 51681 | Qvar 100 inhaler (Sigma Pharmaceuticals Plc)                                                           |
| 51234 | Qvar 100 inhaler (Waymade Healthcare Plc)                                                              |
| 50129 | Qvar 100micrograms/dose Easi-Breathe inhaler (DE Pharmaceuticals)                                      |
| 48709 | Qvar 100micrograms/dose Easi-Breathe inhaler (Sigma Pharmaceuticals Plc)                               |
| 54207 | Qvar 50 inhaler (DE Pharmaceuticals)                                                                   |
| 51415 | Qvar 50 inhaler (Mawdsley-Brooks & Company Ltd)                                                        |
| 56493 | Qvar 50micrograms/dose Easi-Breathe inhaler (Sigma Pharmaceuticals Plc)                                |
| 17695 | QVAR AUTOHALER                                                                                         |
| 17702 | QVAR AUTOHALER                                                                                         |
| 17726 | QVAR CFC FREE                                                                                          |
| 59573 | Relvar Ellipta 184micrograms/dose / 22micrograms/dose dry powder inhaler (GlaxoSmithKline UK Ltd)      |
| 59327 | Relvar Ellipta 92micrograms/dose / 22micrograms/dose dry powder inhaler (GlaxoSmithKline UK Ltd)       |
| 60923 | Salamol 100micrograms/dose Easi-Breathe inhaler (DE Pharmaceuticals)                                   |
| 48547 | Salamol 100micrograms/dose inhaler CFC free (Arrow Generics Ltd)                                       |
| 61591 | Salbutamol 100micrograms/dose inhaler CFC free (Phoenix Healthcare Distribution Ltd)                   |
| 49591 | Salbutamol 100micrograms/dose inhaler CFC free (Sandoz Ltd)                                            |
| 59409 | Salbutamol 100micrograms/dose inhaler CFC free (Waymade Healthcare Plc)                                |
| 48410 | Salbutamol 2.5mg/2.5ml / Ipratropium bromide 500micrograms/2.5ml nebuliser liquid ampoules             |
| 48607 | Salbutamol 2.5mg/2.5ml / Ipratropium bromide 500micrograms/2.5ml nebuliser liquid unit dose vials      |
| 61330 | Salbutamol 2.5mg/2.5ml nebuliser liquid unit dose vials (Alliance Healthcare (Distribution) Ltd)       |
| 49369 | Salbutamol 200microgram inhalation powder blisters                                                     |
| 50315 | Salbutamol 200microgram inhalation powder blisters with device                                         |
| 52543 | Salbutamol 400microgram inhalation powder blisters                                                     |
| 52799 | Salbutamol 400microgram inhalation powder blisters with device                                         |
| 60601 | Salbutamol 5mg/2.5ml nebuliser liquid unit dose vials (Alliance Healthcare (Distribution) Ltd)         |
| 54742 | Salmeterol 25micrograms/dose inhaler CFC free (A A H Pharmaceuticals Ltd)                              |
| 53982 | Seebri Breezhaler 44microgram inhalation powder capsules with device (Novartis Pharmaceuticals UK Ltd) |
| 62126 | Seretide 100 Accuhaler (DE Pharmaceuticals)                                                            |

|       |                                                                                                            |
|-------|------------------------------------------------------------------------------------------------------------|
| 53283 | Seretide 100 Accuhaler (Waymade Healthcare Plc)                                                            |
| 51027 | Seretide 125 Evohaler (DE Pharmaceuticals)                                                                 |
| 51151 | Seretide 125 Evohaler (Lexon (UK) Ltd)                                                                     |
| 53230 | Seretide 250 Accuhaler (DE Pharmaceuticals)                                                                |
| 50560 | Seretide 250 Accuhaler (Sigma Pharmaceuticals Plc)                                                         |
| 61280 | Seretide 250 Accuhaler (Waymade Healthcare Plc)                                                            |
| 48739 | Seretide 250 Evohaler (DE Pharmaceuticals)                                                                 |
| 63252 | Seretide 250 Evohaler (Lexon (UK) Ltd)                                                                     |
| 51909 | Seretide 250 Evohaler (Necessity Supplies Ltd)                                                             |
| 50886 | Seretide 250 Evohaler (Stephar (U.K.) Ltd)                                                                 |
| 49000 | Seretide 250 Evohaler (Waymade Healthcare Plc)                                                             |
| 51593 | Seretide 500 Accuhaler (DE Pharmaceuticals)                                                                |
| 55677 | Seretide 500 Accuhaler (Lexon (UK) Ltd)                                                                    |
| 51861 | Seretide 500 Accuhaler (Mawdsley-Brooks & Company Ltd)                                                     |
| 51394 | Seretide 500 Accuhaler (Waymade Healthcare Plc)                                                            |
| 50051 | Serevent 25micrograms/dose Evohaler (Waymade Healthcare Plc)                                               |
| 56478 | Serevent 50micrograms/dose Accuhaler (DE Pharmaceuticals)                                                  |
| 57544 | Serevent 50micrograms/dose Accuhaler (Waymade Healthcare Plc)                                              |
| 48396 | Singulair 10mg tablets (Necessity Supplies Ltd)                                                            |
| 22892 | SODIUM CROMOGLYCATE 5 MG INH                                                                               |
| 7579  | SODIUM CROMOGLYCATE COMPLETE UNIT INH                                                                      |
| 7578  | SODIUM CROMOGLYCATE INSUF CARTS 20 MG                                                                      |
| 7577  | SODIUM CROMOGLYCATE SPINHALER UNIT                                                                         |
| 9860  | Space chamber type 3 device Device (Pari Medical Ltd)                                                      |
| 6525  | Space chamber type 3 with child mask 0-1 years Device (Pari Medical Ltd)                                   |
| 6220  | Space chamber type 3 with child mask 1-4 years Device (Pari Medical Ltd)                                   |
| 17583 | Space chamber type 3 with child mask 4-7 years Device (Pari Medical Ltd)                                   |
| 51967 | Spiriva 18microgram inhalation powder capsules (Mawdsley-Brooks & Company Ltd)                             |
| 50292 | Spiriva 18microgram inhalation powder capsules (Sigma Pharmaceuticals Plc)                                 |
| 50577 | Spiriva 18microgram inhalation powder capsules with HandiHaler (DE Pharmaceuticals)                        |
| 59638 | Spiriva 18microgram inhalation powder capsules with HandiHaler (Sigma Pharmaceuticals Plc)                 |
| 50103 | Spiriva 18microgram inhalation powder capsules with HandiHaler (Waymade Healthcare Plc)                    |
| 61582 | Spiriva Respimat 2.5micrograms/dose solution for inhalation cartridge with device (Waymade Healthcare Plc) |
| 50945 | Symbicort 100/6 Turbohaler (Mawdsley-Brooks & Company Ltd)                                                 |
| 49114 | Symbicort 100/6 Turbohaler (Sigma Pharmaceuticals Plc)                                                     |
| 51570 | Symbicort 200/6 Turbohaler (DE Pharmaceuticals)                                                            |
| 51759 | Symbicort 200/6 Turbohaler (Mawdsley-Brooks & Company Ltd)                                                 |
| 53491 | Symbicort 200/6 Turbohaler (Sigma Pharmaceuticals Plc)                                                     |
| 53237 | Symbicort 400/12 Turbohaler (DE Pharmaceuticals)                                                           |
| 50739 | Symbicort 400/12 Turbohaler (Mawdsley-Brooks & Company Ltd)                                                |
| 7617  | TEDRAL SA TAB                                                                                              |
| 24023 | Theodrox Tablet (3M Health Care Ltd)                                                                       |



|       |                                                                           |
|-------|---------------------------------------------------------------------------|
| 48484 | Theophylline 250mg/5ml oral suspension                                    |
| 51430 | Theophylline 60mg/5ml oral suspension                                     |
| 25093 | THEOPHYLLINE S/R                                                          |
| 13781 | Ventide Rotahaler (GlaxoSmithKline UK Ltd)                                |
| 49370 | Ventodisks 200microgram (GlaxoSmithKline UK Ltd)                          |
| 49368 | Ventodisks 200microgram with Diskhaler (GlaxoSmithKline UK Ltd)           |
| 48742 | Ventodisks 400microgram (GlaxoSmithKline UK Ltd)                          |
| 48809 | Ventodisks 400microgram with Diskhaler (GlaxoSmithKline UK Ltd)           |
| 48490 | Ventolin 100micrograms/dose Evohaler (DE Pharmaceuticals)                 |
| 48741 | Ventolin 100micrograms/dose Evohaler (Mawdsley-Brooks & Company Ltd)      |
| 48519 | Ventolin 100micrograms/dose Evohaler (Waymade Healthcare Plc)             |
| 53019 | Ventolin 2.5mg Nebules (Mawdsley-Brooks & Company Ltd)                    |
| 50956 | Ventolin 200micrograms/dose Accuhaler (DE Pharmaceuticals)                |
| 57524 | Ventolin 200micrograms/dose Accuhaler (Dowelhurst Ltd)                    |
| 50557 | Ventolin 200micrograms/dose Accuhaler (Lexon (UK) Ltd)                    |
| 50503 | Ventolin 200micrograms/dose Accuhaler (Mawdsley-Brooks & Company Ltd)     |
| 53297 | Ventolin 200micrograms/dose Accuhaler (Sigma Pharmaceuticals Plc)         |
| 57694 | Vertine 25micrograms/dose inhaler CFC free (Teva UK Ltd)                  |
| 15032 | SODIUM CROMOGLYCATE 10 MG/ML SOL                                          |
| 17691 | QVAR CFC FREE                                                             |
| 24291 | FRANOL PLUS                                                               |
| 19360 | ISO-AUTOHALER COMPLETE UNIT                                               |
| 33149 | ISO-AUTOHALER REFIL                                                       |
| 19358 | DUO-AUTOHALER COMPLETE                                                    |
| 59626 | Duo-autohaler Inhalation powder (3M Health Care Ltd)                      |
| 33135 | DUO-AUTOHALER REFIL                                                       |
| 10407 | phyllocontin continus paediatric tablets 100mg [nappharm]                 |
| 14162 | singulair paediatric chewable tablet 4mg [m s d]                          |
| 5594  | singulair paediatric chewable tablet 5mg [m s d]                          |
| 14200 | singulair paediatric granules 4mg/sachet [m s d]                          |
| 26079 | uniphyllin paediatric continus                                            |
| 18484 | ventide paediatric rotacaps [a & h]                                       |
| 24207 | aminophylline paed 50 mg sup                                              |
| 57621 | Singulair Paediatric 4mg granules sachets (Mawdsley-Brooks & Company Ltd) |
| 8705  | ephedrine hcl 24mg/theophylline 120mg mg tab                              |
| 28786 | ephedrine hcl 25mg/aminophylline 130mg mg cap                             |
| 26724 | ephedrine hcl/aminophylline e/c tab                                       |
| 18948 | EPHEDRINE /GUAIPHENESIN /PHENOBARB/ THEO 4.75 MG ELI                      |
| 24035 | EPHEDRINE 15MG/THEOPHYLLINE 120MG 15 MG TAB                               |
| 28394 | ALUPENT .5 MG INJ                                                         |
| 13319 | Nethaprin dospan Tablet (Marion Merrell Dow Ltd)                          |

## Inhaled steroids

| Prodcod e | Product name                                                                                              |
|-----------|-----------------------------------------------------------------------------------------------------------|
| 638       | salmeterol xinafoate/fluticasone propionate                                                               |
| 665       | salmeterol xinafoate/fluticasone propionate                                                               |
| 1801      | beclometasone dipropionate/salbutamol                                                                     |
| 3556      | beclometasone dipropionate/salbutamol                                                                     |
| 3666      | salmeterol xinafoate/fluticasone propionate                                                               |
| 5143      | salmeterol xinafoate/fluticasone propionate                                                               |
| 5161      | salmeterol xinafoate/fluticasone propionate                                                               |
| 5172      | salmeterol xinafoate/fluticasone propionate                                                               |
| 6325      | budesonide/formoterol fumarate dihydrate                                                                  |
| 6780      | budesonide/formoterol fumarate dihydrate                                                                  |
| 7013      | budesonide/formoterol fumarate dihydrate                                                                  |
| 11307     | beclometasone dipropionate/salbutamol                                                                     |
| 14561     | beclometasone dipropionate/salbutamol                                                                     |
| 16625     | beclometasone dipropionate/salbutamol                                                                     |
| 18456     | beclometasone dipropionate/salbutamol                                                                     |
| 18484     | beclometasone dipropionate/salbutamol                                                                     |
| 19121     | beclometasone dipropionate/salbutamol                                                                     |
| 19376     | beclometasone dipropionate/salbutamol                                                                     |
| 27915     | fluticasone                                                                                               |
| 3437      | Becotide rotahaler type 4 insufflator Inhalation powder (Allen and Hanburys Ltd)                          |
| 6839      | Alvesco 160 inhaler (Takeda UK Ltd)                                                                       |
| 7356      | Ciclesonide 80micrograms/dose inhaler CFC free                                                            |
| 9356      | Becotide rotahaler insufflator Inhalation powder (Allen and Hanburys Ltd)                                 |
| 10102     | Ciclesonide 160micrograms/dose inhaler CFC free                                                           |
| 10254     | Mometasone 400micrograms/dose dry powder inhaler                                                          |
| 16018     | Mometasone 200micrograms/dose dry powder inhaler                                                          |
| 16433     | Asmanex 200micrograms/dose Twisthaler (Merck Sharp & Dohme Ltd)                                           |
| 17590     | Asmanex 400micrograms/dose Twisthaler (Merck Sharp & Dohme Ltd)                                           |
| 21224     | Alvesco 80 inhaler (Takeda UK Ltd)                                                                        |
| 22225     | BECLOMETHASONE /SALBUTAMOL                                                                                |
| 46157     | Beclometasone 200 Cyclocaps (Teva UK Ltd)                                                                 |
| 47943     | Beclazone easi-breathe (roi) 100microgram/actuation Pressurised inhalation (Ivax Pharmaceuticals Ireland) |
| 48340     | Clenil Modulite 100micrograms/dose inhaler (Mawdsley-Brooks & Company Ltd)                                |
| 48709     | Qvar 100micrograms/dose Easi-Breathe inhaler (Sigma Pharmaceuticals Plc)                                  |
| 49367     | Clenil Modulite 50micrograms/dose inhaler (Mawdsley-Brooks & Company Ltd)                                 |
| 49412     | Clenil Modulite 200micrograms/dose inhaler (Mawdsley-Brooks & Company Ltd)                                |
| 49711     | Pulmicort 200micrograms/dose inhaler (AstraZeneca UK Ltd)                                                 |
| 49772     | Fluticasone 250micrograms/dose Evohaler (Sigma Pharmaceuticals Plc)                                       |
| 49868     | Fluticasone 250micrograms/dose / Formoterol 10micrograms/dose inhaler CFC free                            |

|       |                                                                                           |
|-------|-------------------------------------------------------------------------------------------|
| 50037 | Pulmicort 0.5mg Respules (Waymade Healthcare Plc)                                         |
| 50129 | Qvar 100micrograms/dose Easi-Breathe inhaler (DE Pharmaceuticals)                         |
| 50287 | Qvar 100 inhaler (DE Pharmaceuticals)                                                     |
| 50701 | Becotide Rotahaler (GlaxoSmithKline UK Ltd)                                               |
| 51209 | Fluticasone 125micrograms/dose / Formoterol 5micrograms/dose inhaler CFC free             |
| 51234 | Qvar 100 inhaler (Waymade Healthcare Plc)                                                 |
| 51270 | Fluticasone 50micrograms/dose / Formoterol 5micrograms/dose inhaler CFC free              |
| 51415 | Qvar 50 inhaler (Mawdsley-Brooks & Company Ltd)                                           |
| 51480 | Qvar 100 Autohaler (DE Pharmaceuticals)                                                   |
| 51681 | Qvar 100 inhaler (Sigma Pharmaceuticals Plc)                                              |
| 51815 | Flixotide 250micrograms/dose Evohaler (Waymade Healthcare Plc)                            |
| 52732 | Pulmicort 0.5mg Respules (Necessity Supplies Ltd)                                         |
| 52806 | Qvar 100 Autohaler (Lexon (UK) Ltd)                                                       |
| 53057 | Flixotide 50micrograms/dose Evohaler (Lexon (UK) Ltd)                                     |
| 53480 | Qvar 100 Autohaler (Stephar (U.K.) Ltd)                                                   |
| 54207 | Qvar 50 inhaler (DE Pharmaceuticals)                                                      |
| 54399 | Qvar 100 Autohaler (Sigma Pharmaceuticals Plc)                                            |
| 56462 | Becodisks 400microgram (Waymade Healthcare Plc)                                           |
| 56471 | Becodisks 200microgram (Mawdsley-Brooks & Company Ltd)                                    |
| 56474 | Flixotide 125micrograms/dose Evohaler (DE Pharmaceuticals)                                |
| 56475 | Flixotide 50micrograms/dose Accuhaler (Sigma Pharmaceuticals Plc)                         |
| 56477 | Flixotide 100micrograms/dose Accuhaler (Waymade Healthcare Plc)                           |
| 56484 | Flixotide 250micrograms/dose Accuhaler (Waymade Healthcare Plc)                           |
| 56493 | Qvar 50micrograms/dose Easi-Breathe inhaler (Sigma Pharmaceuticals Plc)                   |
| 56498 | Pulmicort 200 Turbohaler (Waymade Healthcare Plc)                                         |
| 56499 | Flixotide 500micrograms/dose Accuhaler (Waymade Healthcare Plc)                           |
| 57525 | Flixotide 250micrograms/dose Accuhaler (Stephar (U.K.) Ltd)                               |
| 57555 | Flixotide 125micrograms/dose Evohaler (Dowelhurst Ltd)                                    |
| 57579 | Flixotide 50micrograms/dose Accuhaler (DE Pharmaceuticals)                                |
| 57589 | Becloforte 250micrograms/dose inhaler (Dowelhurst Ltd)                                    |
| 59439 | Fluticasone furoate 92micrograms/dose / Vilanterol 22micrograms/dose dry powder inhaler   |
| 59899 | Fluticasone furoate 184micrograms/dose / Vilanterol 22micrograms/dose dry powder inhaler  |
| 60937 | Pulmicort 200 Turbohaler (Dowelhurst Ltd)                                                 |
| 61644 | Fostair NEXThaler 100micrograms/dose / 6micrograms/dose dry powder inhaler (Chiesi Ltd)   |
| 61664 | Clenil Modulite 250micrograms/dose inhaler (Waymade Healthcare Plc)                       |
| 61975 | Budesonide 500micrograms/2ml nebuliser liquid unit dose vials (Almus Pharmaceuticals Ltd) |
| 62030 | Beclometasone 100micrograms/dose / Formoterol 6micrograms/dose dry powder inhaler         |
| 62341 | Becotide 50 inhaler (Dowelhurst Ltd)                                                      |
| 62518 | Beclometasone 100micrograms/dose inhaler CFC free (Ennogen Healthcare Ltd)                |
| 63585 | Beclometasone 50micrograms/dose inhaler (Almus Pharmaceuticals Ltd)                       |
| 38    | beclometasone dipropionate                                                                |
| 99    | beclometasone dipropionate                                                                |
| 454   | budesonide                                                                                |

|      |                            |
|------|----------------------------|
| 883  | beclometasone dipropionate |
| 895  | beclometasone dipropionate |
| 896  | beclometasone dipropionate |
| 908  | budesonide                 |
| 909  | budesonide                 |
| 911  | fluticasone propionate     |
| 947  | budesonide                 |
| 956  | budesonide                 |
| 959  | budesonide                 |
| 960  | budesonide                 |
| 1100 | beclometasone dipropionate |
| 1236 | beclometasone dipropionate |
| 1242 | beclometasone dipropionate |
| 1243 | beclometasone dipropionate |
| 1258 | beclometasone dipropionate |
| 1259 | beclometasone dipropionate |
| 1269 | beclometasone dipropionate |
| 1406 | beclometasone dipropionate |
| 1412 | fluticasone propionate     |
| 1424 | fluticasone propionate     |
| 1426 | fluticasone propionate     |
| 1518 | fluticasone propionate     |
| 1537 | beclometasone dipropionate |
| 1551 | beclometasone dipropionate |
| 1552 | beclometasone dipropionate |
| 1642 | budesonide                 |
| 1676 | fluticasone propionate     |
| 1680 | budesonide                 |
| 1725 | beclometasone dipropionate |
| 1727 | beclometasone dipropionate |
| 1734 | beclometasone dipropionate |
| 1861 | beclometasone dipropionate |
| 1885 | beclometasone dipropionate |
| 1951 | beclometasone dipropionate |
| 1956 | budesonide                 |
| 1959 | budesonide                 |
| 2092 | budesonide                 |
| 2124 | budesonide                 |
| 2125 | budesonide                 |
| 2148 | beclometasone dipropionate |
| 2159 | beclometasone dipropionate |
| 2160 | beclometasone dipropionate |
| 2229 | beclometasone dipropionate |

|      |                            |
|------|----------------------------|
| 2282 | fluticasone propionate     |
| 2335 | beclometasone dipropionate |
| 2440 | fluticasone propionate     |
| 2600 | beclometasone dipropionate |
| 2723 | fluticasone propionate     |
| 2892 | beclometasone dipropionate |
| 2893 | beclometasone dipropionate |
| 2951 | fluticasone propionate     |
| 2992 | beclometasone dipropionate |
| 3018 | beclometasone dipropionate |
| 3065 | betamethasone valerate     |
| 3075 | beclometasone dipropionate |
| 3119 | beclometasone dipropionate |
| 3150 | beclometasone dipropionate |
| 3188 | budesonide                 |
| 3220 | beclometasone dipropionate |
| 3289 | fluticasone propionate     |
| 3363 | beclometasone dipropionate |
| 3442 | budesonide                 |
| 3546 | beclometasone dipropionate |
| 3570 | budesonide                 |
| 3743 | beclometasone dipropionate |
| 3753 | fluticasone                |
| 3838 | beclomethasone             |
| 3927 | beclometasone dipropionate |
| 3947 | beclometasone dipropionate |
| 3988 | fluticasone                |
| 3989 | fluticasone propionate     |
| 3993 | beclometasone dipropionate |
| 4131 | fluticasone propionate     |
| 4132 | fluticasone propionate     |
| 4365 | beclometasone dipropionate |
| 4413 | beclometasone dipropionate |
| 4499 | beclometasone dipropionate |
| 4545 | budesonide                 |
| 4601 | beclometasone dipropionate |
| 4688 | fluticasone propionate     |
| 4759 | beclometasone dipropionate |
| 4801 | budesonide                 |
| 4803 | beclometasone dipropionate |
| 4926 | fluticasone propionate     |
| 4942 | budesonide                 |
| 5223 | fluticasone propionate     |

|       |                                             |
|-------|---------------------------------------------|
| 5309  | fluticasone propionate                      |
| 5521  | beclometasone dipropionate                  |
| 5522  | beclometasone dipropionate                  |
| 5551  | fluticasone propionate                      |
| 5558  | salmeterol xinafoate/fluticasone propionate |
| 5580  | fluticasone propionate                      |
| 5683  | fluticasone propionate                      |
| 5718  | fluticasone propionate                      |
| 5804  | beclometasone dipropionate                  |
| 5822  | fluticasone propionate                      |
| 5864  | salmeterol xinafoate/fluticasone propionate |
| 5885  | fluticasone propionate                      |
| 5942  | salmeterol xinafoate/fluticasone propionate |
| 5975  | fluticasone propionate                      |
| 5992  | beclometasone dipropionate                  |
| 6569  | salmeterol xinafoate/fluticasone propionate |
| 6616  | salmeterol xinafoate/fluticasone propionate |
| 6746  | budesonide/formoterol fumarate dihydrate    |
| 6796  | budesonide/formoterol fumarate dihydrate    |
| 6938  | salmeterol xinafoate/fluticasone propionate |
| 7602  | fluticasone propionate                      |
| 7638  | fluticasone propionate                      |
| 7653  | beclometasone dipropionate                  |
| 7724  | betamethasone valerate                      |
| 7788  | budesonide                                  |
| 7891  | fluticasone propionate                      |
| 7948  | fluticasone propionate                      |
| 7964  | beclometasone dipropionate                  |
| 8111  | beclometasone dipropionate                  |
| 8251  | budesonide                                  |
| 8433  | budesonide                                  |
| 8450  | fluticasone                                 |
| 8635  | fluticasone propionate                      |
| 9164  | fluticasone propionate                      |
| 9233  | beclometasone dipropionate                  |
| 9477  | beclometasone dipropionate                  |
| 9571  | beclometasone dipropionate                  |
| 9577  | beclometasone dipropionate                  |
| 9599  | beclometasone dipropionate                  |
| 9921  | beclometasone dipropionate                  |
| 10090 | beclometasone dipropionate                  |
| 10218 | budesonide/formoterol fumarate dihydrate    |
| 10321 | budesonide                                  |

|       |                                             |
|-------|---------------------------------------------|
| 11198 | beclometasone dipropionate                  |
| 11410 | salmeterol xinafoate/fluticasone propionate |
| 11478 | fluticasone propionate                      |
| 11497 | beclometasone dipropionate                  |
| 11588 | salmeterol xinafoate/fluticasone propionate |
| 11618 | salmeterol xinafoate/fluticasone propionate |
| 11732 | beclometasone dipropionate                  |
| 12994 | salmeterol xinafoate/fluticasone propionate |
| 13037 | beclometasone dipropionate                  |
| 13040 | salmeterol xinafoate/fluticasone propionate |
| 13273 | salmeterol xinafoate/fluticasone propionate |
| 13290 | beclometasone dipropionate                  |
| 13815 | beclometasone dipropionate                  |
| 14294 | beclometasone dipropionate                  |
| 14321 | beclometasone dipropionate                  |
| 14524 | beclometasone dipropionate                  |
| 14567 | beclometasone dipropionate                  |
| 14590 | beclometasone dipropionate                  |
| 14700 | budesonide                                  |
| 14736 | beclometasone dipropionate                  |
| 14757 | beclometasone dipropionate                  |
| 15326 | beclometasone dipropionate                  |
| 15706 | beclometasone dipropionate                  |
| 16054 | budesonide                                  |
| 16148 | beclometasone dipropionate                  |
| 16151 | beclometasone dipropionate                  |
| 16158 | beclometasone dipropionate                  |
| 16305 | fluticasone propionate                      |
| 16584 | beclometasone dipropionate                  |
| 17465 | fluticasone propionate                      |
| 17654 | beclometasone dipropionate                  |
| 17670 | budesonide                                  |
| 18394 | beclometasone dipropionate                  |
| 18537 | budesonide                                  |
| 18848 | beclometasone dipropionate                  |
| 19031 | beclometasone dipropionate                  |
| 19389 | beclometasone dipropionate                  |
| 19401 | beclometasone dipropionate                  |
| 19563 | beclometasone                               |
| 19736 | beclometasone                               |
| 20707 | beclometasone                               |
| 20763 | beclometasone                               |
| 20812 | budesonide                                  |

|       |                            |
|-------|----------------------------|
| 20825 | beclometasone dipropionate |
| 21005 | beclometasone dipropionate |
| 21482 | beclometasone dipropionate |
| 23675 | budesonide                 |
| 23741 | budesonide                 |
| 24219 | beclometasone              |
| 24898 | beclometasone dipropionate |
| 25204 | beclometasone dipropionate |
| 26063 | beclometasone dipropionate |
| 26665 | budesonide                 |
| 27188 | budesonide                 |
| 27525 | beclometasone              |
| 27583 | budesonide                 |
| 27679 | beclometasone dipropionate |
| 28073 | beclometasone dipropionate |
| 28640 | beclometasone dipropionate |
| 28761 | beclometasone dipropionate |
| 29325 | beclometasone dipropionate |
| 30210 | beclometasone dipropionate |
| 30238 | beclometasone dipropionate |
| 30649 | budesonide                 |
| 31774 | beclometasone dipropionate |
| 32874 | beclometasone dipropionate |
| 33258 | beclometasone dipropionate |
| 33849 | beclometasone dipropionate |
| 34315 | beclometasone dipropionate |
| 34428 | beclometasone dipropionate |
| 34739 | beclometasone dipropionate |
| 34794 | beclometasone dipropionate |
| 34859 | beclometasone dipropionate |
| 34919 | beclometasone dipropionate |
| 35071 | beclometasone dipropionate |
| 35106 | beclometasone dipropionate |
| 35107 | beclometasone dipropionate |
| 35113 | beclometasone dipropionate |
| 35118 | beclometasone dipropionate |
| 35225 | fluticasone propionate     |
| 35288 | beclometasone dipropionate |
| 35293 | beclometasone dipropionate |
| 35299 | beclometasone dipropionate |
| 35374 | fluticasone propionate     |
| 35392 | fluticasone propionate     |
| 35408 | beclometasone dipropionate |



|       |                                                          |
|-------|----------------------------------------------------------|
| 35430 | beclometasone dipropionate                               |
| 35461 | fluticasone propionate                                   |
| 35510 | budesonide                                               |
| 35580 | beclometasone dipropionate                               |
| 35602 | budesonide                                               |
| 35611 | fluticasone propionate                                   |
| 35631 | budesonide                                               |
| 35638 | fluticasone propionate                                   |
| 35652 | beclometasone dipropionate                               |
| 35700 | fluticasone propionate                                   |
| 35724 | budesonide                                               |
| 35772 | fluticasone propionate                                   |
| 35905 | fluticasone propionate                                   |
| 35986 | fluticasone propionate                                   |
| 36021 | fluticasone propionate                                   |
| 36090 | fluticasone propionate                                   |
| 36290 | fluticasone propionate                                   |
| 36401 | fluticasone propionate                                   |
| 36462 | fluticasone propionate                                   |
| 37432 | beclometasone dipropionate/formoterol fumarate dihydrate |
| 37447 | fluticasone propionate                                   |
| 37470 | beclometasone dipropionate/formoterol fumarate dihydrate |
| 39099 | budesonide                                               |
| 39102 | budesonide                                               |
| 39200 | beclometasone dipropionate                               |
| 39879 | budesonide                                               |
| 40057 | budesonide                                               |
| 41269 | beclometasone dipropionate                               |
| 41412 | beclometasone dipropionate                               |
| 42928 | fluticasone propionate                                   |
| 42985 | fluticasone propionate                                   |
| 42994 | fluticasone propionate                                   |
| 43074 | fluticasone propionate                                   |

## Chronic kidney disease

| Medcode | Readterm                                             |
|---------|------------------------------------------------------|
| 512     | Chronic renal failure                                |
| 6712    | End stage renal failure                              |
| 8330    | End-stage renal disease                              |
| 12479   | Chronic kidney disease stage 4                       |
| 12566   | Chronic kidney disease stage 3                       |
| 12585   | Chronic kidney disease stage 5                       |
| 12720   | Chronic renal impairment                             |
| 53852   | End stage renal failure                              |
| 89332   | predicted stage chronic kidney disease               |
| 94793   | Chronic kidney disease stage 3 with proteinuria      |
| 94965   | Chronic kidney disease stage 3A                      |
| 95121   | Chronic kidney disease stage 2 without proteinuria   |
| 95122   | Chronic kidney disease stage 4 with proteinuria      |
| 95123   | Chronic kidney disease stage 3 without proteinuria   |
| 95145   | CKD stage 3 with proteinuria                         |
| 95175   | Chronic kidney disease stage 3A without proteinuria  |
| 95176   | CKD stage 3A without proteinuria                     |
| 95177   | Chronic kidney disease stage 3B without proteinuria  |
| 95178   | Chronic kidney disease stage 3B with proteinuria     |
| 95179   | Chronic kidney disease stage 3B                      |
| 95180   | CKD stage 3B with proteinuria                        |
| 95188   | CKD stage 3 without proteinuria                      |
| 95405   | Chronic kidney disease stage 5 without proteinuria   |
| 95406   | Chronic kidney disease stage 4 without proteinuria   |
| 95408   | Chronic kidney disease stage 3A with proteinuria     |
| 95508   | Chronic kidney disease stage 5 with proteinuria      |
| 95571   | CKD stage 3A with proteinuria                        |
| 97587   | CKD stage 4 without proteinuria                      |
| 97683   | CKD stage 5 without proteinuria                      |
| 99160   | CKD stage 5 with proteinuria                         |
| 99312   | CKD stage 4 with proteinuria                         |
| 100633  | CKD stage 3B without proteinuria                     |
| 105151  | chronic kidney disease stage 5                       |
| 2994    | Peritoneal dialysis                                  |
| 2995    | Acquired arteriovenous fistula                       |
| 2996    | Haemodialysis NEC                                    |
| 3205    | Creation of arteriovenous fistula NEC                |
| 8037    | Insertion of ambulatory peritoneal dialysis catheter |
| 9765    | Ligation of acquired arteriovenous fistula           |
| 11773   | Dialysis for renal failure                           |

|       |                                                              |
|-------|--------------------------------------------------------------|
| 18779 | Repair of acquired arteriovenous fistula                     |
| 20073 | Renal dialysis                                               |
| 20196 | H/O: renal dialysis                                          |
| 22252 | [V]Renal dialysis status                                     |
| 23773 | Removal of ambulatory peritoneal dialysis catheter           |
| 24151 | Arteriovenous shunt                                          |
| 25521 | Creation of brachial-cephalic fistula                        |
| 28158 | Kidney dialysis with complication without blame              |
| 28269 | Creation of radial-cephalic fistula                          |
| 30709 | Insertion of temporary peritoneal dialysis catheter          |
| 30756 | Continuous ambulatory peritoneal dialysis                    |
| 31478 | Removal of infected arteriovenous shunt                      |
| 31549 | Compensation for renal failure                               |
| 35921 | Failure of sterile precautions during perfusion              |
| 36442 | Placement ambulatory dialysis apparatus - compens renal fail |
| 44422 | H/O: kidney dialysis                                         |
| 45160 | [V]Aftercare involving peritoneal dialysis                   |
| 46145 | [V]Aftercare involving renal dialysis NOS                    |
| 46438 | [X] Peritoneal dialysis associated peritonitis               |
| 48022 | Other specified compensation for renal failure               |
| 48639 | Mechanical complication of dialysis catheter                 |
| 48713 | mechanical complication of arterio-venous surgical fistula   |
| 49028 | h/o: kidney recipient                                        |
| 52088 | [V]Preparatory care for dialysis                             |
| 54844 | [X]Failure sterile precautions dur kidney dialys/other perf  |
| 56760 | Placement ambulatory apparatus compensation renal failure    |
| 58618 | Arteriovenous shunt NOS                                      |
| 59194 | Placement ambulatory apparatus- compensate renal failure OS  |
| 59315 | Stenosis of arteriovenous dialysis fistula                   |
| 60302 | Creation of graft fistula for dialysis                       |
| 60446 | Care of haemodialysis equipment                              |
| 60498 | Reversing haemodialysis lines                                |
| 60743 | [V]Aftercare involving intermittent dialysis                 |
| 63038 | [V]Unspecified aftercare involving intermittent dialysis     |
| 63063 | Insertion of arteriovenous prosthesis                        |
| 63190 | Attention to arteriovenous shunt                             |
| 63305 | Thrombectomy of arteriovenous fistula                        |
| 63488 | [V]Other specified aftercare involving intermittent dialysis |
| 63502 | Peritoneal dialysis bag procedure                            |
| 64636 | Compensation for renal failure NOS                           |
| 64828 | Peritoneal dialysis NEC                                      |
| 65089 | Placement other apparatus- compensate for renal failure NOS  |
| 65398 | Other specified arteriovenous shunt                          |

|        |                                                              |
|--------|--------------------------------------------------------------|
| 66714  | Renal dialysis with complication without blame               |
| 69266  | Failure of sterile precautions during kidney dialysis        |
| 69427  | Accid cut puncture perf h'ge - perfusion NOS                 |
| 69760  | [X]Other dialysis                                            |
| 71124  | Haemofiltration                                              |
| 72336  | Priming haemodialysis lines                                  |
| 74905  | Haemodialysis training                                       |
| 83513  | Placement other apparatus for compensation for renal failure |
| 86419  | dialysis fluid glucose level                                 |
| 88597  | Automated peritoneal dialysis                                |
| 96131  | Banding of arteriovenous fistula                             |
| 96184  | Accid cut puncture perf h'ge - kidney dialysis               |
| 96347  | Ligation of arteriovenous dialysis fistula                   |
| 98888  | peritoneal dialysis sample                                   |
| 99692  | [v]aftercare involving extracorporeal dialysis               |
| 100235 | Ligation of acquired arteriovenous fistula                   |
| 101124 | continuous ambulatory peritoneal dialysis associated perit   |
| 101736 | dialysis fluid urea level                                    |
| 101756 | Thomas intravascular shunt for dialysis                      |
| 101912 | dialysis training                                            |
| 104586 | flushing of peritoneal dialysis catheter                     |
| 104719 | peritoneal dialysis training                                 |
| 105436 | anaphylactoid reaction due to haemodialysis                  |
| 105742 | aneurysm of anastomotic site of dialysis av fistula          |
| 105760 | ruptured aneurysm of dialysis vascular access                |
| 106720 | thrombosis of dialysis arteriovenous fistula                 |
| 106975 | haemorrhage of dialysis arteriovenous fistula                |
| 107082 | occlusion of dialysis arteriovenous fistula                  |
| 107188 | aneurysm of dialysis arteriovenous fistula                   |
| 107217 | arteriovenous fistula thrombosis                             |
| 107220 | aneurysm of needle site of dialysis arteriovenous fistula    |
| 107260 | infection of dialysis arteriovenous fistula                  |
| 107719 | ligation of arteriovenous dialysis graft                     |
| 107746 | stenosis of dialysis vascular access                         |
| 107900 | disorders associated with peritoneal dialysis                |
| 108116 | occlusion of dialysis vascular access                        |
| 108213 | infection of dialysis arteriovenous graft                    |
| 108423 | rupture of dialysis arteriovenous graft                      |
| 16929  | Anaemia secondary to renal failure                           |
| 25394  | Anaemia secondary to chronic renal failure                   |
| 28684  | Hypertensive heart and renal disease with renal failure      |
| 32423  | Hypertensive renal disease with renal failure                |
| 53940  | [X]Other chronic renal failure                               |

|        |                                                             |
|--------|-------------------------------------------------------------|
| 57987  | Hyperten heart&renal dis+both(congestv)heart and renal fail |
| 107901 | placement other apparatus- compensate for renal failure os  |
| 70712  | det.ren.func.after ren.transpl                              |
| 72004  | Excision of rejected transplanted kidney                    |
| 93366  | Interventions associated with transplantation of kidney     |
| 103429 | post-transplantation of kidney examination, recipient       |
| 103649 | transplantation surgery                                     |
| 104049 | interventions associated with transplantation of kidney nos |
| 104050 | os interventions associated with transplantation of kidney  |
| 105328 | Cadaveric renal transplant                                  |
| 105724 | unexplained episode of renal transplant dysfunction         |
| 105787 | Xenograft renal transplant                                  |
| 106620 | chronic rejection of renal transplant                       |
| 106866 | vascular complication of renal transplant                   |
| 107183 | discussion about kidney transplantation                     |
| 107752 | urological complication of renal transplant                 |
| 109455 | Allotransplantation of kidney from cadaver NEC              |
| 2997   | Transplantation of kidney                                   |
| 5504   | Transplantation of kidney NOS                               |
| 5911   | [V]Kidney transplanted                                      |
| 11553  | Kidney transplant failure and rejection                     |
| 11745  | Transplantation of kidney from live donor                   |
| 17253  | Renal transplant planned                                    |
| 18774  | Renal transplant with complication, without blame           |
| 24361  | Transplantation of kidney from cadaver                      |
| 26862  | Exploration of renal transplant                             |
| 48057  | Renal tubulo-interstitial disordrs in transplant rejectn    |
| 48121  | Transplant nephrectomy                                      |
| 54990  | Kidney transplant with complication, without blame          |
| 55151  | Autotransplant of kidney                                    |
| 66705  | Allotransplantation of kidney from live donor               |
| 70874  | Other specified transplantation of kidney                   |
| 89924  | Allotransplantation of kidney from cadaver, heart-beating   |
| 90952  | Pre-transplantation of kidney work-up, recipient            |
| 96133  | Allotransplantation kidney from cadaver, heart non-beating  |
| 98364  | Allotransplantation of kidney from cadaver                  |
| 100693 | [X]Renal tubulo-interstitial disorders/transplant rejection |
| 105811 | renal transplant rejection                                  |
| 10081  | Chronic uraemia                                             |

| icd   | icd_description                               |
|-------|-----------------------------------------------|
| I12.0 | Hypertensive renal disease with renal failure |

|       |                                                             |
|-------|-------------------------------------------------------------|
| I13.1 | Hypertensive heart and renal disease with renal failure     |
| I13.2 | Hyper heart and renal dis both (cong) heart and renal fail  |
| I77.0 | arteriovenous fistula, acquired                             |
| N16.5 | renal tubulo-interstitial disorders in transplant rejection |
| N18.0 | End-stage renal disease                                     |
| N18.3 | Chronic kidney disease, stage 3                             |
| N18.4 | Chronic kidney disease, stage 4                             |
| N18.5 | chronic kidney disease, stage 5                             |
| N18.8 | Other chronic renal failure                                 |
| N18.9 | Chronic renal failure, unspecified                          |
| N19   | Unspecified kidney failure                                  |
| T82.4 | mechanical complication of vascular dialysis catheter       |
| T86.1 | kidney transplant failure and rejection                     |
| Y60.2 | during kidney dialysis or other perfusion                   |
| Y61.2 | during kidney dialysis or other perfusion                   |
| Y62.2 | during kidney dialysis or other perfusion                   |
| Y84.1 | kidney dialysis                                             |
| Z49   | care involving dialysis                                     |
| Z49.0 | preparatory care for dialysis                               |
| Z49.1 | extracorporeal dialysis                                     |
| Z49.2 | other dialysis                                              |
| Z94.0 | kidney transplant status                                    |
| Z99.2 | dependence on renal dialysis                                |

| opcs | description                                                  |
|------|--------------------------------------------------------------|
| L742 | creation of arteriovenous fistula nec                        |
| L746 | creation of graft fistula for dialysis                       |
| M01  | Transplantation of kidney                                    |
| M011 | Autotransplantation of kidney                                |
| M012 | Allotransplantation of kidney from live donor                |
| M013 | Allotransplantation of kidney from cadaver NEC               |
| M014 | Allotransplantation of kidney from cadaver heart beating     |
| M015 | Allotransplantation of kidney from cadaver heart non-beating |
| M018 | Other specified transplantation of kidney                    |
| M019 | Unspecified transplantation of kidney                        |
| M026 | Excision of rejected transplanted kidney                     |
| M027 | excision of transplanted kidney nec                          |
| M084 | Exploration of transplanted kidney                           |
| M172 | Pre-transplantation of kidney work-up - recipient            |
| M174 | Post-transplantation of kidney examination - recipient       |
| X401 | Renal dialysis                                               |

|      |                                                                      |
|------|----------------------------------------------------------------------|
| X402 | Peritoneal dialysis NEC                                              |
| X403 | Haemodialysis NEC                                                    |
| X404 | Haemofiltration                                                      |
| X405 | Automated peritoneal dialysis                                        |
| X406 | Continuous ambulatory peritoneal dialysis                            |
| X41  | Placement of ambulatory apparatus for compensation for renal failure |
| X411 | Insertion of ambulatory peritoneal dialysis catheter                 |
| X412 | Removal of ambulatory peritoneal dialysis catheter                   |
| X421 | Insertion of temporary peritoneal dialysis catheter                  |

## Diabetes

| Medcode | Readterm                                                      | Diabetes category |
|---------|---------------------------------------------------------------|-------------------|
| 54846   | Diabetes monitoring deleted                                   | Possible          |
| 72333   | Listed for Diabetology admissn                                | Possible          |
| 103743  | Diabetes care plan declined                                   | Possible          |
| 103761  | Insulin alert pat information booklet information discussed   | Possible          |
| 103816  | Insulin alert patient information booklet given               | Possible          |
| 104374  | Provision of diabetes clinical summary                        | Possible          |
| 104669  | Prof judgemnt not to engage pt wt insulin alert requirements  | Possible          |
| 105207  | Referral to community diabetes clinic                         | Possible          |
| 105446  | Insulin administration education                              | Possible          |
| 105937  | Referral to community diabetes specialist nurse declined      | Possible          |
| 106218  | Declined diabetic retinopathy screening                       | Possible          |
| 106269  | Diabetic retinopathy screening administrative status          | Possible          |
| 106327  | Excluded from diabetic retinopathy screening                  | Possible          |
| 106328  | Excluded diabetic retinop screen as under care ophthalmolgist | Possible          |
| 106329  | Excluded from diabetic retinopathy screening as blind         | Possible          |
| 106332  | Eligible for diabetic retinopathy screening                   | Possible          |
| 106350  | Excluded from diabetic retinopathy screening as moved away    | Possible          |
| 106351  | Excluded from diabetic retinop screen as no longer diabetic   | Possible          |
| 106352  | Excluded from diabetic retinopathy screening as deceased      | Possible          |
| 106441  | Ineligible for diabetic retinopathy screening                 | Possible          |
| 106445  | Excluded from diabetic retinopathy screen physical disorder   | Possible          |
| 106679  | Provision of written information about diabetes and driving   | Possible          |
| 106722  | Diabetic foot screening invitation second letter              | Possible          |
| 106723  | Diabetic foot screening invitation first letter               | Possible          |
| 106738  | Diabetic foot screening invitation                            | Possible          |
| 106778  | Excluded frm diabetic retinopathy screen as terminal illness  | Possible          |
| 106953  | Referral to DAFNE diabetes structured educn prog declined     | Possible          |
| 107361  | Education about diabetes and driving                          | Possible          |
| 107414  | Diabetes structured education programme not available         | Possible          |
| 107452  | Further diabetic monitoring                                   | Possible          |
| 107597  | Excluded from diabetic retinophy screen as learn disability   | Possible          |
| 107739  | Advice about diabetes and driving                             | Possible          |
| 107793  | Diabetic foot screening invitation third letter               | Possible          |
| 109520  | Eligibility permanently inactive for diabetic retinop screen  | Possible          |
| 109521  | Eligibility temporarily inactive for diabetic retinop screen  | Possible          |
| 104287  | Referral to community diabetes service                        | Possible          |
| 608     | Follow-up diabetic assessment                                 | Possible          |
| 2379    | Seen in diabetic clinic                                       | Possible          |
| 3550    | Diabetic monitoring                                           | Possible          |
| 7777    | Referral to diabetologist                                     | Possible          |



|       |                                                             |          |
|-------|-------------------------------------------------------------|----------|
| 8306  | Referral to diabetes nurse                                  | Possible |
| 8414  | Pt advised re diabetic diet                                 | Possible |
| 8618  | Seen by diabetic liaison nurse                              | Possible |
| 9145  | DNA - Did not attend diabetic clinic                        | Possible |
| 9897  | Diabetes monitoring admin.                                  | Possible |
| 11041 | Excepted from diabetes qual indicators: Patient unsuitable  | Possible |
| 11348 | Excepted from diabetes quality indicators: Informed dissent | Possible |
| 11977 | Referral to diabetes nurse                                  | Possible |
| 12030 | Diabetes monitoring 3rd letter                              | Possible |
| 12225 | Refer, diabetic liaison nurse                               | Possible |
| 12483 | Advice about blood glucose control                          | Possible |
| 12507 | Seen by diabetic liaison nurse                              | Possible |
| 13067 | Diabetic monitoring NOS                                     | Possible |
| 13070 | Initial diabetic assessment                                 | Possible |
| 13191 | Diabetes clinic administration                              | Possible |
| 13192 | Diabetes monitor. check done                                | Possible |
| 13194 | Diabetes monitoring 1st letter                              | Possible |
| 13195 | Diabetes monitoring 2nd letter                              | Possible |
| 13197 | Attends diabetes monitoring                                 | Possible |
| 13678 | Referral to diabetic liaison nurse                          | Possible |
| 17478 | Self monitoring of blood glucose                            | Possible |
| 17846 | Self monitoring of urine glucose                            | Possible |
| 18824 | Diabetic foot examination declined                          | Possible |
| 20900 | Diabetes monitored                                          | Possible |
| 22130 | Diabetes monitoring default                                 | Possible |
| 26603 | Refuses diabetes monitoring                                 | Possible |
| 28574 | Exception reporting: diabetes quality indicators            | Possible |
| 31141 | Diabetes monitor.phone invite                               | Possible |
| 31240 | Diabetes monitor.verbal invite                              | Possible |
| 31241 | Diabetes monitoring admin.NOS                               | Possible |
| 32739 | Seen in community diabetes specialist clinic                | Possible |
| 32770 | Glucose tol. test diabetic                                  | Possible |
| 34541 | Private referral to diabetologist                           | Possible |
| 36669 | Diabetic monitoring not required                            | Possible |
| 38103 | Seen in diabetic nurse consultant clinic                    | Possible |
| 38129 | Seen in community diabetic specialist nurse clinic          | Possible |
| 42217 | Self monitoring of blood and urine glucose                  | Possible |
| 46521 | Seen by diabetologist                                       | Possible |
| 47011 | Referral to diabetes structured education programme         | Possible |
| 47058 | Discharged from care of diabetes specialist nurse           | Possible |
| 50937 | Referral to diabetes preconception counselling clinic       | Possible |
| 55123 | Date diabetic treatment stopp.                              | Possible |
| 58133 | Discharge by diabetic liaison nurse                         | Possible |

|        |                                                              |          |
|--------|--------------------------------------------------------------|----------|
| 58159  | Insulin therapy declined                                     | Possible |
| 58639  | Patient held diabetic record declined                        | Possible |
| 61470  | Diabetic monitoring - higher risk albumin excretion          | Possible |
| 66475  | Diabetic monitoring - lower risk albumin excretion           | Possible |
| 69163  | Referral to multidisciplinary diabetic clinic                | Possible |
| 82474  | Referral to community diabetes specialist nurse              | Possible |
| 93657  | Referral to DESMOND diabetes structured education programme  | Possible |
| 93704  | Referral to DAFNE diabetes structured education programme    | Possible |
| 93854  | Diabetes structured education programme declined             | Possible |
| 93870  | Referral to XPERT diabetes structured education programme    | Possible |
| 94330  | Referral to diabetes special interest general practitioner   | Possible |
| 94955  | Did not attend XPERT diabetes structured education programme | Possible |
| 94956  | Did not complete XPERT diabetes structured education program | Possible |
| 95093  | Did not complete DESMOND diabetes structured educat program  | Possible |
| 95094  | Did not complete diabetes structured education programme     | Possible |
| 95159  | Did not attend DESMOND diabetes structured education program | Possible |
| 95553  | Did not attend diabetes structured education programme       | Possible |
| 95813  | Seen in multidisciplinary diabetic clinic                    | Possible |
| 97281  | Seen by general practitioner special interest in diabetes    | Possible |
| 97809  | Did not complete DAFNE diabetes structured education program | Possible |
| 99277  | Did not attend DAFNE diabetes structured education programme | Possible |
| 100422 | Discharged from diabetes shared care programme               | Possible |
| 100791 | Insulin treatment stopped                                    | Possible |
| 101190 | Declined consent for diabetes year of care programme         | Possible |
| 101455 | Diabetes monitor invitation by SMS (short message service)   | Possible |
| 101456 | Diabetic dietary review declined                             | Possible |
| 101834 | Excepted from diabetes qual indicators: service unavailable  | Possible |
| 102316 | Suspected diabetes mellitus                                  | Possible |
| 102490 | Diabetic assessment of erectile dysfunction                  | Possible |
| 12682  | Patient offered diabetes structured education programme      | Possible |
| 12703  | Education score - diabetes                                   | Possible |
| 13057  | Health education - diabetes                                  | Possible |
| 26605  | Attended diabetes structured education programme             | Possible |
| 32619  | Patient diabetes education review                            | Possible |
| 34528  | Diabetes well being questionnaire                            | Possible |
| 67664  | Education score - diabetes                                   | Possible |
| 68546  | Diabetes clinic satisfaction questionnaire                   | Possible |
| 68818  | DTSQ - Diabetes treatment satisfaction questionnaire         | Possible |
| 93390  | Attended DAFNE diabetes structured education programme       | Possible |
| 93491  | DAFNE diabetes structured education programme completed      | Possible |
| 93529  | DESMOND diabetes structured education programme completed    | Possible |
| 93631  | XPERT diabetes structured education programme completed      | Possible |
| 94011  | Attended XPERT diabetes structured education programme       | Possible |

|        |                                                              |                 |
|--------|--------------------------------------------------------------|-----------------|
| 94186  | Diabetes structured education programme completed            | Possible        |
| 94699  | Diabetes treatment satisfaction questionnaire                | Possible        |
| 100436 | Education in self management of diabetes                     | Possible        |
| 38130  | Diabetes wellbeing questionnaire                             | Possible        |
| 91164  | CSQ - Diabetes clinic satisfaction questionnaire             | Possible        |
| 97824  | DWBQ - Diabetes wellbeing questionnaire                      | Possible        |
| 98954  | Diabetes treatment satisfaction questionnaire                | Possible        |
| 30648  | Did not attend diabetic retinopathy clinic                   | Possible        |
| 55140  | Self monitoring urine ketones                                | Possible        |
| 102434 | Diabetic erectile dysfunction review                         | Possible        |
| 102549 | Insulin dose                                                 | Possible        |
| 102768 | Did not attend diabetes foot screening                       | Possible        |
| 6430   | Attending diabetes clinic                                    | Possible        |
| 46963  | Insulin-dependent diabetes mellitus with renal complications | Type I diabetes |
| 102946 | Insulin-dependent diabetes mellitus with renal complications | Type I diabetes |
| 104453 | Type 1 diabetic dietary review                               | Type I diabetes |
| 105337 | Type I diabetes mellitus - poor control                      | Type I diabetes |
| 108007 | Type I diabetes mellitus with multiple complications         | Type I diabetes |
| 108724 | Type I diabetes mellitus with gastroparesis                  | Type I diabetes |
| 109051 | Insulin dependent diabetes mellitus with gangrene            | Type I diabetes |
| 109837 | Type I diabetes mellitus with renal complications            | Type I diabetes |
| 109878 | Diet advice for insulin-dependent diabetes                   | Type I diabetes |
| 1038   | Insulin dependent diabetes mellitus                          | Type I diabetes |
| 1549   | Type 1 diabetes mellitus                                     | Type I diabetes |
| 1647   | Insulin dependent diabetes mellitus                          | Type I diabetes |
| 6509   | Insulin dependent diabetes mellitus with retinopathy         | Type I diabetes |
| 6791   | Insulin dependent diabetes mellitus - poor control           | Type I diabetes |
| 10418  | Type 1 diabetes mellitus with nephropathy                    | Type I diabetes |
| 10692  | Type 1 diabetes mellitus with ketoacidosis                   | Type I diabetes |
| 12455  | Type I diabetes mellitus                                     | Type I diabetes |
| 17545  | Type I diabetes mellitus with diabetic cataract              | Type I diabetes |
| 17858  | Type 1 diabetes mellitus                                     | Type I diabetes |
| 18230  | Type 1 diabetes mellitus with neuropathic arthropathy        | Type I diabetes |
| 18387  | Type 1 diabetes mellitus with retinopathy                    | Type I diabetes |
| 18505  | IDDM-Insulin dependent diabetes mellitus                     | Type I diabetes |
| 18642  | Type 1 diabetes mellitus with arthropathy                    | Type I diabetes |
| 18683  | Type 1 diabetes mellitus with ulcer                          | Type I diabetes |
| 21983  | Type 1 diabetes mellitus with renal complications            | Type I diabetes |
| 22871  | Type 1 diabetes mellitus with exudative maculopathy          | Type I diabetes |
| 24423  | Type I diabetes mellitus                                     | Type I diabetes |
| 24490  | Diabetes mellitus, juvenile type, no mention of complication | Type I diabetes |
| 24694  | Insulin dependent diabetes mellitus with mononeuropathy      | Type I diabetes |
| 26855  | Unstable insulin dependent diabetes mellitus                 | Type I diabetes |

|       |                                                              |                 |
|-------|--------------------------------------------------------------|-----------------|
| 30294 | Type 1 diabetes mellitus with persistent microalbuminuria    | Type I diabetes |
| 30323 | Type 1 diabetes mellitus with persistent proteinuria         | Type I diabetes |
| 31310 | Insulin dependent diabetes maturity onset                    | Type I diabetes |
| 32359 | Perceived control of insulin-dependent diabetes              | Type I diabetes |
| 35288 | Type 1 diabetes mellitus - poor control                      | Type I diabetes |
| 38076 | Insulin lipohypertrophy                                      | Type I diabetes |
| 38161 | Type I diabetes mellitus with retinopathy                    | Type I diabetes |
| 39070 | Type 1 diabetes mellitus with hypoglycaemic coma             | Type I diabetes |
| 39809 | Insulin dependent diab mell with neuropathic arthropathy     | Type I diabetes |
| 40023 | Diabetes mellitus, juvenile type, with hyperosmolar coma     | Type I diabetes |
| 40682 | Type 1 diabetes mellitus maturity onset                      | Type I diabetes |
| 40837 | Type 1 diabetes mellitus with ketoacidotic coma              | Type I diabetes |
| 41049 | Type 1 diabetes mellitus with retinopathy                    | Type I diabetes |
| 41716 | Insulin dependent diabetes mellitus with polyneuropathy      | Type I diabetes |
| 42567 | Diabetes mellitus, juvenile type, with ketoacidotic coma     | Type I diabetes |
| 42729 | Type I diabetes mellitus with hypoglycaemic coma             | Type I diabetes |
| 42831 | Type 1 diabetes mellitus with neurological complications     | Type I diabetes |
| 43493 | Insulin site lipohypertrophy                                 | Type I diabetes |
| 43921 | Unstable type 1 diabetes mellitus                            | Type I diabetes |
| 44260 | Insulin dependent diabetes mellitus with diabetic cataract   | Type I diabetes |
| 44440 | Insulin dependent diabetes mellitus with hypoglycaemic coma  | Type I diabetes |
| 44443 | Insulin dependent diabetes mellitus with ulcer               | Type I diabetes |
| 45276 | Insulin dependent diabetes mellitus with multiple complicat  | Type I diabetes |
| 45914 | Type 1 diabetes mellitus - poor control                      | Type I diabetes |
| 46301 | Type 1 diabetes mellitus with polyneuropathy                 | Type I diabetes |
| 46850 | Type I diabetes mellitus - poor control                      | Type I diabetes |
| 47582 | Type 1 diabetes mellitus with renal complications            | Type I diabetes |
| 47649 | Type 1 diabetes mellitus with ophthalmic complications       | Type I diabetes |
| 47650 | Type 1 diabetes mellitus with multiple complications         | Type I diabetes |
| 49146 | Type I diabetes mellitus with neurological complications     | Type I diabetes |
| 49276 | Insulin-dependent diabetes mellitus with ophthalmic comps    | Type I diabetes |
| 49554 | Type 1 diabetes mellitus with diabetic cataract              | Type I diabetes |
| 49949 | Unstable type I diabetes mellitus                            | Type I diabetes |
| 50960 | Pre-existing diabetes mellitus, insulin-dependent            | Type I diabetes |
| 51261 | Insulin dependent diabetes mellitus                          | Type I diabetes |
| 51957 | Type I diabetes mellitus with ulcer                          | Type I diabetes |
| 52104 | Insulin dependent diabetes mellitus with multiple complicatn | Type I diabetes |
| 52283 | Insulin-dependent diabetes mellitus with neurological comps  | Type I diabetes |
| 53200 | Diabetes mellitus, juvenile type, with ketoacidosis          | Type I diabetes |
| 54008 | Type 1 diabetes mellitus with neuropathic arthropathy        | Type I diabetes |
| 54600 | Unstable insulin dependent diabetes mellitus                 | Type I diabetes |
| 55239 | Type 1 diabetes mellitus with gastroparesis                  | Type I diabetes |
| 56448 | Insulin-dependent diabetes without complication              | Type I diabetes |

|       |                                                              |                 |
|-------|--------------------------------------------------------------|-----------------|
| 57621 | Insulin dependent diabetes mellitus with nephropathy         | Type I diabetes |
| 60107 | Unstable type I diabetes mellitus                            | Type I diabetes |
| 60208 | Type I diabetes mellitus with neuropathic arthropathy        | Type I diabetes |
| 60499 | Insulin dependent diabetes mellitus with gangrene            | Type I diabetes |
| 61344 | Type I diabetes mellitus with renal complications            | Type I diabetes |
| 61829 | Type 1 diabetes mellitus with neurological complications     | Type I diabetes |
| 62209 | Type I diabetes mellitus with ketoacidosis                   | Type I diabetes |
| 62352 | Type I diabetes mellitus with arthropathy                    | Type I diabetes |
| 62613 | Type I diabetes mellitus without complication                | Type I diabetes |
| 63017 | Type I diabetes mellitus maturity onset                      | Type I diabetes |
| 64446 | Insulin dependent diab mell with peripheral angiopathy       | Type I diabetes |
| 65616 | Insulin dependent diabetes mellitus with arthropathy         | Type I diabetes |
| 66145 | Type I diabetes mellitus with ketoacidotic coma              | Type I diabetes |
| 66872 | Type I diabetes mellitus with nephropathy                    | Type I diabetes |
| 67853 | Diabetes mellitus, juvenile, + neurological manifestation    | Type I diabetes |
| 68105 | Type 1 diabetes mellitus with mononeuropathy                 | Type I diabetes |
| 68390 | Type 1 diabetes mellitus with ulcer                          | Type I diabetes |
| 68792 | Diabetes mellitus, juvenile type, + unspecified complication | Type I diabetes |
| 69043 | Dietary advice for type I diabetes                           | Type I diabetes |
| 69124 | IDDM with peripheral circulatory disorder                    | Type I diabetes |
| 69676 | Type 1 diabetes mellitus without complication                | Type I diabetes |
| 69748 | Diabetes mellitus, juvenile type, + ophthalmic manifestation | Type I diabetes |
| 69993 | Type 1 diabetes mellitus with gangrene                       | Type I diabetes |
| 70448 | Diabetes mellitus, juvenile +peripheral circulatory disorder | Type I diabetes |
| 70766 | Type 1 diabetes mellitus with hypoglycaemic coma             | Type I diabetes |
| 72702 | Insulin dependent diabetes mellitus - poor control           | Type I diabetes |
| 85660 | Diabetes type 1 review                                       | Type I diabetes |
| 91942 | Type I diabetes mellitus with multiple complications         | Type I diabetes |
| 91943 | Type I diabetes mellitus with polyneuropathy                 | Type I diabetes |
| 93468 | Type 1 diabetes mellitus with peripheral angiopathy          | Type I diabetes |
| 93875 | Insulin dependent diabetes mellitus with retinopathy         | Type I diabetes |
| 93878 | Type I diabetes mellitus with ulcer                          | Type I diabetes |
| 93922 | Diabetes mellitus, juvenile type, with renal manifestation   | Type I diabetes |
| 95343 | Type I diabetes mellitus with retinopathy                    | Type I diabetes |
| 95992 | Type I diabetes mellitus without complication                | Type I diabetes |
| 96235 | Type I diabetes mellitus maturity onset                      | Type I diabetes |
| 97446 | Type 1 diabetes mellitus maturity onset                      | Type I diabetes |
| 97474 | Unstable type 1 diabetes mellitus                            | Type I diabetes |
| 97849 | Insulin dependent diabetes maturity onset                    | Type I diabetes |
| 97894 | Type I diabetes mellitus with exudative maculopathy          | Type I diabetes |
| 98071 | Insulin-dependent diabetes mellitus with ophthalmic comps    | Type I diabetes |
| 98392 | Maturity onset diabetes in youth type 1                      | Type I diabetes |
| 98704 | Insulin dependent diabetes mellitus with ulcer               | Type I diabetes |

|        |                                                             |                  |
|--------|-------------------------------------------------------------|------------------|
| 99231  | Type I diabetes mellitus with mononeuropathy                | Type I diabetes  |
| 99311  | Type I diabetes mellitus with ophthalmic complications      | Type I diabetes  |
| 99716  | Insulin dependent diabetes mellitus with hypoglycaemic coma | Type I diabetes  |
| 99719  | Insulin-dependent diabetes without complication             | Type I diabetes  |
| 100770 | Insulin dependent diabetes mellitus with diabetic cataract  | Type I diabetes  |
| 101311 | Insulin dependent diabetes mellitus with polyneuropathy     | Type I diabetes  |
| 101735 | Insulin-dependent diabetes mellitus with neurological comps | Type I diabetes  |
| 102112 | Type I diabetes mellitus with gangrene                      | Type I diabetes  |
| 102163 | Insulin dependent diabetes mellitus with nephropathy        | Type I diabetes  |
| 102620 | Type I diabetes mellitus with persistent microalbuminuria   | Type I diabetes  |
| 102704 | Type I diabetic dietary review                              | Type I diabetes  |
| 102740 | Type 1 diabetes mellitus with ophthalmic complications      | Type I diabetes  |
| 103902 | Type II diabetes mellitus with arthropathy                  | Type II diabetes |
| 104323 | Type II diabetes mellitus with gangrene                     | Type II diabetes |
| 104639 | Type II diabetes mellitus with peripheral angiopathy        | Type II diabetes |
| 105784 | Type 2 diabetes mellitus without complication               | Type II diabetes |
| 106061 | Type II diabetes mellitus with ketoacidotic coma            | Type II diabetes |
| 106528 | Type II diabetes mellitus with ketoacidosis                 | Type II diabetes |
| 107701 | Hyperosmolar non-ketotic state in type II diabetes mellitus | Type II diabetes |
| 108005 | Type 2 diabetes mellitus with multiple complications        | Type II diabetes |
| 109103 | Type II diabetes mellitus without complication              | Type II diabetes |
| 109197 | Type II diabetes mellitus with neuropathic arthropathy      | Type II diabetes |
| 109865 | Type 2 diabetes mellitus with polyneuropathy                | Type II diabetes |
| 506    | Non-insulin dependent diabetes mellitus                     | Type II diabetes |
| 758    | Type 2 diabetes mellitus                                    | Type II diabetes |
| 1407   | Insulin treated Type 2 diabetes mellitus                    | Type II diabetes |
| 4513   | Non-insulin dependent diabetes mellitus                     | Type II diabetes |
| 5884   | NIDDM - Non-insulin dependent diabetes mellitus             | Type II diabetes |
| 8403   | Non-insulin dependent diabetes mellitus - poor control      | Type II diabetes |
| 12640  | Type 2 diabetes mellitus with nephropathy                   | Type II diabetes |
| 12736  | Type 2 diabetes mellitus with gangrene                      | Type II diabetes |
| 14803  | Diabetes mellitus, adult onset, no mention of complication  | Type II diabetes |
| 14889  | Maturity onset diabetes                                     | Type II diabetes |
| 17262  | Non-insulin-dependent diabetes mellitus with retinopathy    | Type II diabetes |
| 17859  | Type 2 diabetes mellitus                                    | Type II diabetes |
| 18143  | Type II diabetes mellitus with arthropathy                  | Type II diabetes |
| 18209  | Type 2 diabetes mellitus with renal complications           | Type II diabetes |
| 18219  | Type II diabetes mellitus                                   | Type II diabetes |
| 18264  | Insulin treated Type II diabetes mellitus                   | Type II diabetes |
| 18278  | Insulin treated Type 2 diabetes mellitus                    | Type II diabetes |
| 18390  | Type 2 diabetes mellitus with persistent microalbuminuria   | Type II diabetes |
| 18425  | Type 2 diabetes mellitus with polyneuropathy                | Type II diabetes |
| 18496  | Type 2 diabetes mellitus with retinopathy                   | Type II diabetes |

|       |                                                              |                  |
|-------|--------------------------------------------------------------|------------------|
| 18777 | Type 2 diabetes mellitus with renal complications            | Type II diabetes |
| 22884 | Type II diabetes mellitus                                    | Type II diabetes |
| 24458 | Type II diabetes mellitus - poor control                     | Type II diabetes |
| 24693 | Non-insulin dependent diabetes mellitus with arthropathy     | Type II diabetes |
| 24836 | Type 2 diabetes mellitus with nephropathy                    | Type II diabetes |
| 25041 | Dietary advice for type II diabetes                          | Type II diabetes |
| 25591 | Type 2 diabetes mellitus with exudative maculopathy          | Type II diabetes |
| 25627 | Type 2 diabetes mellitus - poor control                      | Type II diabetes |
| 26054 | Type 2 diabetes mellitus with persistent proteinuria         | Type II diabetes |
| 29979 | Non-insulin-dependent diabetes mellitus without complication | Type II diabetes |
| 32627 | Type 2 diabetes mellitus with ketoacidosis                   | Type II diabetes |
| 33807 | Diabetes mellitus, adult with gangrene                       | Type II diabetes |
| 34268 | Type 2 diabetes mellitus with neurological complications     | Type II diabetes |
| 34450 | Hyperosmolar non-ketotic state in type 2 diabetes mellitus   | Type II diabetes |
| 34912 | Non-insulin dependent diabetes mellitus with ulcer           | Type II diabetes |
| 35105 | Diabetes mellitus, adult onset, with renal manifestation     | Type II diabetes |
| 35385 | Type 2 diabetes mellitus with neuropathic arthropathy        | Type II diabetes |
| 36633 | Hyperosmolar non-ketotic state in type 2 diabetes mellitus   | Type II diabetes |
| 36695 | Diabetes mellitus autosomal dominant type 2                  | Type II diabetes |
| 37648 | Insulin treated non-insulin dependent diabetes mellitus      | Type II diabetes |
| 37806 | Type 2 diabetes mellitus with peripheral angiopathy          | Type II diabetes |
| 39317 | Diabetes mellitus, adult onset, + neurological manifestation | Type II diabetes |
| 40401 | Non-insulin dependent diabetes mellitus with gangrene        | Type II diabetes |
| 40962 | Non-insulin dependent d m with neuropathic arthropathy       | Type II diabetes |
| 41389 | Diabetes mellitus, adult onset, + ophthalmic manifestation   | Type II diabetes |
| 42762 | Type 2 diabetes mellitus with retinopathy                    | Type II diabetes |
| 43139 | Diabetes mellitus, adult onset, with hyperosmolar coma       | Type II diabetes |
| 43227 | Type II diabetes mellitus with multiple complications        | Type II diabetes |
| 43785 | Non-insulin dependent diabetes mellitus with hypoglyca coma  | Type II diabetes |
| 44779 | Type 2 diabetes mellitus with diabetic cataract              | Type II diabetes |
| 44982 | Type 2 diabetes mellitus with diabetic cataract              | Type II diabetes |
| 45467 | Non-insulin dependent diabetes mellitus with polyneuropathy  | Type II diabetes |
| 45913 | Type 2 diabetes mellitus - poor control                      | Type II diabetes |
| 45919 | Type 2 diabetes mellitus with neurological complications     | Type II diabetes |
| 46150 | Type 2 diabetes mellitus with gangrene                       | Type II diabetes |
| 46624 | Maturity onset diabetes in youth                             | Type II diabetes |
| 46917 | Type 2 diabetes mellitus with hypoglycaemic coma             | Type II diabetes |
| 47315 | Type II diabetes mellitus - poor control                     | Type II diabetes |
| 47321 | Type 2 diabetes mellitus with ophthalmic complications       | Type II diabetes |
| 47409 | Type II diabetes mellitus with polyneuropathy                | Type II diabetes |
| 47816 | Type II diabetes mellitus with neuropathic arthropathy       | Type II diabetes |
| 47954 | Type 2 diabetes mellitus without complication                | Type II diabetes |
| 48192 | Type II diabetes mellitus with diabetic cataract             | Type II diabetes |

|       |                                                             |                  |
|-------|-------------------------------------------------------------|------------------|
| 49074 | Type 2 diabetes mellitus with ulcer                         | Type II diabetes |
| 49655 | Type II diabetes mellitus with retinopathy                  | Type II diabetes |
| 49869 | Type 2 diabetes mellitus with arthropathy                   | Type II diabetes |
| 50225 | Type II diabetes mellitus with renal complications          | Type II diabetes |
| 50429 | Non-insulin-dependent diabetes mellitus with ophthalm comps | Type II diabetes |
| 50527 | Type II diabetes mellitus with polyneuropathy               | Type II diabetes |
| 50609 | Pre-existing diabetes mellitus, non-insulin-dependent       | Type II diabetes |
| 50813 | Type II diabetes mellitus with mononeuropathy               | Type II diabetes |
| 51756 | Type 2 diabetes mellitus with ketoacidotic coma             | Type II diabetes |
| 52303 | Non-insulin-dependent diabetes mellitus with renal comps    | Type II diabetes |
| 53392 | Type II diabetes mellitus without complication              | Type II diabetes |
| 54212 | Non-insulin-dependent d m with peripheral angiopath         | Type II diabetes |
| 54856 | Diabetes mellitus, adult onset, with ketoacidosis           | Type II diabetes |
| 54899 | Type II diabetes mellitus with peripheral angiopathy        | Type II diabetes |
| 55075 | Type II diabetes mellitus with ulcer                        | Type II diabetes |
| 55842 | Non-insulin-dependent diabetes mellitus with neuro comps    | Type II diabetes |
| 56268 | Type II diabetes mellitus with hypoglycaemic coma           | Type II diabetes |
| 56803 | NIDDM with peripheral circulatory disorder                  | Type II diabetes |
| 57278 | Type II diabetes mellitus with renal complications          | Type II diabetes |
| 58604 | Type II diabetes mellitus with retinopathy                  | Type II diabetes |
| 59253 | Type 2 diabetes mellitus with arthropathy                   | Type II diabetes |
| 59365 | Non-insulin dependent diabetes mellitus with nephropathy    | Type II diabetes |
| 59725 | Type II diabetes mellitus with ophthalmic complications     | Type II diabetes |
| 59991 | Maturity onset diabetes in youth type 2                     | Type II diabetes |
| 60699 | Type 2 diabetes mellitus with peripheral angiopathy         | Type II diabetes |
| 60796 | Type II diabetes mellitus with persistent proteinuria       | Type II diabetes |
| 61071 | Type 2 diabetes mellitus with hypoglycaemic coma            | Type II diabetes |
| 62107 | Type II diabetes mellitus with gangrene                     | Type II diabetes |
| 62146 | Non-insulin-dependent diabetes mellitus with multiple comps | Type II diabetes |
| 62674 | Type 2 diabetes mellitus with mononeuropathy                | Type II diabetes |
| 63357 | Diabetes mellitus, adult, + peripheral circulatory disorder | Type II diabetes |
| 63371 | Diabetes mellitus, adult, + other specified manifestation   | Type II diabetes |
| 63690 | Type 2 diabetes mellitus with gastroparesis                 | Type II diabetes |
| 63762 | Diabetes mellitus, adult onset, + unspecified complication  | Type II diabetes |
| 64571 | Type II diabetes mellitus with nephropathy                  | Type II diabetes |
| 64668 | Insulin treated Type II diabetes mellitus                   | Type II diabetes |
| 65267 | Type 2 diabetes mellitus with multiple complications        | Type II diabetes |
| 65704 | Type 2 diabetes mellitus with ulcer                         | Type II diabetes |
| 66965 | Type 2 diabetes mellitus with neuropathic arthropathy       | Type II diabetes |
| 67905 | Type II diabetes mellitus with neurological complications   | Type II diabetes |
| 68843 | Diabetes mellitus, adult onset, with ketoacidotic coma      | Type II diabetes |
| 69278 | Non-insulin depend diabetes mellitus with diabetic cataract | Type II diabetes |
| 70316 | Type 2 diabetes mellitus with ophthalmic complications      | Type II diabetes |



|        |                                                             |                       |
|--------|-------------------------------------------------------------|-----------------------|
| 72320  | Non-insulin dependent diabetes mellitus with mononeuropathy | Type II diabetes      |
| 83532  | Diabetes type 2 review                                      | Type II diabetes      |
| 85991  | Type II diabetes mellitus with persistent microalbuminuria  | Type II diabetes      |
| 91646  | Type II diabetes mellitus with ulcer                        | Type II diabetes      |
| 93727  | Type II diabetes mellitus with diabetic cataract            | Type II diabetes      |
| 95351  | Type II diabetes mellitus with mononeuropathy               | Type II diabetes      |
| 95636  | Latent autoimmune diabetes mellitus in adult                | Type II diabetes      |
| 98616  | Type II diabetes mellitus with neurological complications   | Type II diabetes      |
| 98723  | Type II diabetes mellitus with hypoglycaemic coma           | Type II diabetes      |
| 100964 | Type II diabetes mellitus with ophthalmic complications     | Type II diabetes      |
| 101801 | Type II diabetic dietary review                             | Type II diabetes      |
| 102201 | Type II diabetes mellitus with nephropathy                  | Type II diabetes      |
| 102611 | Type 2 diabetic dietary review                              | Type II diabetes      |
| 13196  | Fundoscopy - diabetic check                                 | Diabetes, unspecified |
| 103798 | Diabetic medicine                                           | Diabetes, unspecified |
| 107423 | Diabetes self-management plan review                        | Diabetes, unspecified |
| 9974   | Seen in diabetic eye clinic                                 | Diabetes, unspecified |
| 10824  | Seen in diabetic foot clinic                                | Diabetes, unspecified |
| 61557  | Diabetology D.V. requested                                  | Diabetes, unspecified |
| 103762 | Insulin passport completed                                  | Diabetes, unspecified |
| 103772 | Insulin passport given                                      | Diabetes, unspecified |
| 103817 | Informed dissent not to carry insulin passport              | Diabetes, unspecified |
| 105585 | Diabetes clinical pathway                                   | Diabetes, unspecified |
| 108655 | Insulin passport not checked                                | Diabetes, unspecified |
| 45499  | Kimmelstiel - Wilson disease                                | Diabetes, unspecified |
| 103935 | No evidence of diabetic nephropathy                         | Diabetes, unspecified |
| 104254 | Subcutaneous infusion with insulin pump                     | Diabetes, unspecified |
| 104858 | Insulin passport checked                                    | Diabetes, unspecified |
| 105302 | Proteinuric diabetic nephropathy                            | Diabetes, unspecified |
| 105740 | O/E - Left diabetic foot at increased risk                  | Diabetes, unspecified |
| 105741 | O/E - Right diabetic foot at increased risk                 | Diabetes, unspecified |
| 106360 | Erectile dysfunction due to diabetes mellitus               | Diabetes, unspecified |
| 107331 | Conversion to insulin in secondary care                     | Diabetes, unspecified |
| 107464 | Diabetes Year of Care annual review                         | Diabetes, unspecified |
| 107508 | Conversion to insulin by diabetes specialist nurse          | Diabetes, unspecified |
| 107881 | Clinical diabetic nephropathy                               | Diabetes, unspecified |
| 108993 | Diabetes self-management plan agreed                        | Diabetes, unspecified |
| 108634 | In-house diabetic foot screening                            | Diabetes, unspecified |
| 711    | Diabetes mellitus                                           | Diabetes, unspecified |
| 1323   | Diabetic retinopathy                                        | Diabetes, unspecified |
| 1682   | Diabetes mellitus with ketoacidosis                         | Diabetes, unspecified |
| 1684   | Diabetic on oral treatment                                  | Diabetes, unspecified |
| 2340   | Diabetic amyotrophy                                         | Diabetes, unspecified |

|       |                                                         |                       |
|-------|---------------------------------------------------------|-----------------------|
| 2342  | Diabetic neuropathy                                     | Diabetes, unspecified |
| 2378  | Diabetic - poor control                                 | Diabetes, unspecified |
| 2471  | Nephrotic syndrome in diabetes mellitus                 | Diabetes, unspecified |
| 2475  | Diabetic nephropathy                                    | Diabetes, unspecified |
| 2478  | Brittle diabetes                                        | Diabetes, unspecified |
| 2986  | Preproliferative diabetic retinopathy                   | Diabetes, unspecified |
| 3286  | Proliferative diabetic retinopathy                      | Diabetes, unspecified |
| 3837  | Diabetic maculopathy                                    | Diabetes, unspecified |
| 5002  | Diabetic polyneuropathy                                 | Diabetes, unspecified |
| 6125  | Diabetic annual review                                  | Diabetes, unspecified |
| 7059  | Admit diabetic emergency                                | Diabetes, unspecified |
| 7069  | Background diabetic retinopathy                         | Diabetes, unspecified |
| 7328  | Cellulitis in diabetic foot                             | Diabetes, unspecified |
| 7563  | Diabetic on diet only                                   | Diabetes, unspecified |
| 7795  | Diabetes mellitus with neuropathy                       | Diabetes, unspecified |
| 8836  | Diabetes management plan given                          | Diabetes, unspecified |
| 8842  | Diabetic on insulin                                     | Diabetes, unspecified |
| 9013  | Unstable diabetes                                       | Diabetes, unspecified |
| 9835  | O/E - diabetic maculopathy present both eyes            | Diabetes, unspecified |
| 9881  | Mixed diabetic ulcer - foot                             | Diabetes, unspecified |
| 9958  | Hb. A1C - diabetic control                              | Diabetes, unspecified |
| 10098 | Other specified diabetes mellitus with other spec comps | Diabetes, unspecified |
| 10099 | Advanced diabetic maculopathy                           | Diabetes, unspecified |
| 10642 | Dietary advice for diabetes mellitus                    | Diabetes, unspecified |
| 10659 | Diabetic cataract                                       | Diabetes, unspecified |
| 10755 | Non proliferative diabetic retinopathy                  | Diabetes, unspecified |
| 10977 | Diabetic peripheral neuropathy screening                | Diabetes, unspecified |
| 11018 | Diabetic retinopathy 12 month review                    | Diabetes, unspecified |
| 11047 | Conversion to insulin                                   | Diabetes, unspecified |
| 11094 | Under care of diabetic foot screener                    | Diabetes, unspecified |
| 11129 | O/E - left eye background diabetic retinopathy          | Diabetes, unspecified |
| 11433 | O/E - right eye background diabetic retinopathy         | Diabetes, unspecified |
| 11471 | Diabetes medication review                              | Diabetes, unspecified |
| 11599 | Pan retinal photocoagulation for diabetes               | Diabetes, unspecified |
| 11626 | Diabetic retinopathy NOS                                | Diabetes, unspecified |
| 11663 | Neuropathic diabetic ulcer - foot                       | Diabetes, unspecified |
| 11677 | Refer to diabetic foot screener                         | Diabetes, unspecified |
| 11930 | Under care of diabetes specialist nurse                 | Diabetes, unspecified |
| 12213 | Patient on maximal tolerated therapy for diabetes       | Diabetes, unspecified |
| 12247 | Diabetic foot examination not indicated                 | Diabetes, unspecified |
| 12262 | Diabetic retinopathy screening refused                  | Diabetes, unspecified |
| 12307 | Diabetes care by hospital only                          | Diabetes, unspecified |
| 12506 | Diabetes: practice programme                            | Diabetes, unspecified |

|       |                                                            |                       |
|-------|------------------------------------------------------------|-----------------------|
| 12675 | Diabetes: shared care programme                            | Diabetes, unspecified |
| 13069 | Has seen dietician - diabetes                              | Diabetes, unspecified |
| 13071 | Diabetic - good control                                    | Diabetes, unspecified |
| 13074 | Diabetic diet                                              | Diabetes, unspecified |
| 13078 | Diabetic weight reducing diet                              | Diabetes, unspecified |
| 13097 | O/E - right eye proliferative diabetic retinopathy         | Diabetes, unspecified |
| 13099 | O/E - right eye preproliferative diabetic retinopathy      | Diabetes, unspecified |
| 13100 | O/E - no right diabetic retinopathy                        | Diabetes, unspecified |
| 13101 | O/E - left eye proliferative diabetic retinopathy          | Diabetes, unspecified |
| 13102 | O/E - right eye diabetic maculopathy                       | Diabetes, unspecified |
| 13103 | O/E - left eye preproliferative diabetic retinopathy       | Diabetes, unspecified |
| 13104 | O/E - no left diabetic retinopathy                         | Diabetes, unspecified |
| 13108 | O/E - left eye diabetic maculopathy                        | Diabetes, unspecified |
| 13279 | Other specified diabetes mellitus with renal complications | Diabetes, unspecified |
| 14049 | Hb. A1C - diabetic control NOS                             | Diabetes, unspecified |
| 14050 | HbA1 - diabetic control                                    | Diabetes, unspecified |
| 15690 | Diabetes mellitus with ketoacidotic coma                   | Diabetes, unspecified |
| 16230 | Diabetes mellitus with neurological manifestation          | Diabetes, unspecified |
| 16490 | Diabetic treatment changed                                 | Diabetes, unspecified |
| 16491 | Diabetes mellitus with polyneuropathy                      | Diabetes, unspecified |
| 16502 | Diabetes mellitus with renal manifestation                 | Diabetes, unspecified |
| 16881 | [V]Dietary counselling in diabetes mellitus                | Diabetes, unspecified |
| 17067 | Autonomic neuropathy due to diabetes                       | Diabetes, unspecified |
| 17095 | O/E - Right diabetic foot at risk                          | Diabetes, unspecified |
| 17247 | Diabetic mononeuritis NOS                                  | Diabetes, unspecified |
| 17313 | Diabetic iritis                                            | Diabetes, unspecified |
| 17817 | Subcutaneous injection of insulin                          | Diabetes, unspecified |
| 17869 | Diabetic-uncooperative patient                             | Diabetes, unspecified |
| 17886 | Diabetic - follow-up default                               | Diabetes, unspecified |
| 18056 | Foot abnormality - diabetes related                        | Diabetes, unspecified |
| 18142 | Diabetic cheiroarthropathy                                 | Diabetes, unspecified |
| 18167 | Annual diabetic blood test                                 | Diabetes, unspecified |
| 18311 | Diabetic retinopathy screening                             | Diabetes, unspecified |
| 18662 | Diabetic retinopathy 6 month review                        | Diabetes, unspecified |
| 18747 | Diabetic retinopathy screening not indicated               | Diabetes, unspecified |
| 19381 | Referral to diabetic eye clinic                            | Diabetes, unspecified |
| 19739 | Diabetic retinopathy screening offered                     | Diabetes, unspecified |
| 20696 | Injection sites - diabetic                                 | Diabetes, unspecified |
| 21482 | Diabetes mellitus with hyperosmolar coma                   | Diabetes, unspecified |
| 21689 | Diabetic lipid lowering diet                               | Diabetes, unspecified |
| 22023 | Diabetic - poor control NOS                                | Diabetes, unspecified |
| 22573 | Diabetes mellitus NOS with neurological manifestation      | Diabetes, unspecified |
| 22823 | Diabetic foot examination                                  | Diabetes, unspecified |

|       |                                                             |                       |
|-------|-------------------------------------------------------------|-----------------------|
| 22967 | Retinal abnormality - diabetes related                      | Diabetes, unspecified |
| 24327 | Ischaemic ulcer diabetic foot                               | Diabetes, unspecified |
| 24363 | Diabetic stabilisation                                      | Diabetes, unspecified |
| 24571 | Asymptomatic diabetic neuropathy                            | Diabetes, unspecified |
| 25636 | Diabetic diet - poor compliance                             | Diabetes, unspecified |
| 26604 | Diabetic diet - good compliance                             | Diabetes, unspecified |
| 26664 | O/E - Left diabetic foot at risk                            | Diabetes, unspecified |
| 26666 | O/E - Right diabetic foot at low risk                       | Diabetes, unspecified |
| 26667 | O/E - Left diabetic foot at low risk                        | Diabetes, unspecified |
| 27891 | Diabetic Charcot arthropathy                                | Diabetes, unspecified |
| 27921 | Foot abnormality - diabetes related                         | Diabetes, unspecified |
| 28769 | Diabetic on insulin and oral treatment                      | Diabetes, unspecified |
| 28856 | Transition of diabetes care options discussed               | Diabetes, unspecified |
| 28873 | Diabetic 6 month review                                     | Diabetes, unspecified |
| 29041 | Date diabetic treatment start                               | Diabetes, unspecified |
| 30477 | High risk proliferative diabetic retinopathy                | Diabetes, unspecified |
| 31053 | [D]Widespread diabetic foot gangrene                        | Diabetes, unspecified |
| 31156 | O/E - Left diabetic foot at moderate risk                   | Diabetes, unspecified |
| 31157 | O/E - Right diabetic foot at moderate risk                  | Diabetes, unspecified |
| 31171 | O/E - Right diabetic foot at high risk                      | Diabetes, unspecified |
| 31172 | O/E - Left diabetic foot at high risk                       | Diabetes, unspecified |
| 31790 | Polyneuropathy in diabetes                                  | Diabetes, unspecified |
| 32403 | Diabetes mellitus with gangrene                             | Diabetes, unspecified |
| 32556 | Diabetes with gangrene                                      | Diabetes, unspecified |
| 33254 | Diabetes mellitus with ophthalmic manifestation             | Diabetes, unspecified |
| 33343 | Diabetes mellitus with other specified manifestation        | Diabetes, unspecified |
| 34152 | Diabetic peripheral angiopathy                              | Diabetes, unspecified |
| 34283 | Diabetes mellitus NOS with ophthalmic manifestation         | Diabetes, unspecified |
| 35107 | Diabetes mellitus with nephropathy NOS                      | Diabetes, unspecified |
| 35116 | O/E - Left diabetic foot - ulcerated                        | Diabetes, unspecified |
| 35316 | O/E - Right diabetic foot - ulcerated                       | Diabetes, unspecified |
| 35321 | Non-urgent diabetic admission                               | Diabetes, unspecified |
| 35383 | Diabetic patient unsuitable for digital retinal photography | Diabetes, unspecified |
| 35399 | Diabetes mellitus with peripheral circulatory disorder      | Diabetes, unspecified |
| 35785 | Chronic painful diabetic neuropathy                         | Diabetes, unspecified |
| 36798 | Continuous subcutaneous infusion of insulin                 | Diabetes, unspecified |
| 37315 | Diabetic mononeuropathy                                     | Diabetes, unspecified |
| 38078 | Understands diet - diabetes                                 | Diabetes, unspecified |
| 38617 | Other specified diabetes mellitus with ketoacidosis         | Diabetes, unspecified |
| 38986 | Diabetes mellitus with no mention of complication           | Diabetes, unspecified |
| 39420 | Myasthenic syndrome due to diabetic amyotrophy              | Diabetes, unspecified |
| 41686 | [X]Other specified diabetes mellitus                        | Diabetes, unspecified |
| 42505 | Diabetes mellitus NOS with ketoacidosis                     | Diabetes, unspecified |

|       |                                                              |                       |
|-------|--------------------------------------------------------------|-----------------------|
| 43453 | Diabetes mellitus autosomal dominant                         | Diabetes, unspecified |
| 43857 | Lipoatrophic diabetes mellitus                               | Diabetes, unspecified |
| 43951 | Diabetic - cooperative patient                               | Diabetes, unspecified |
| 44033 | Diabetic mononeuritis multiplex                              | Diabetes, unspecified |
| 45491 | Diabetes mellitus with unspecified complication              | Diabetes, unspecified |
| 46290 | Other specified diabetes mellitus with multiple comps        | Diabetes, unspecified |
| 47032 | Diabetes care plan agreed                                    | Diabetes, unspecified |
| 47144 | O/E - diabetic maculopathy absent both eyes                  | Diabetes, unspecified |
| 47328 | O/E - right eye stable treated prolif diabetic retinopathy   | Diabetes, unspecified |
| 47341 | Diabetic crisis monitoring                                   | Diabetes, unspecified |
| 47370 | Diabetology D.V. done                                        | Diabetes, unspecified |
| 47377 | Other specified diabetes mellitus with ophthalmic complicatn | Diabetes, unspecified |
| 47584 | Advanced diabetic retinal disease                            | Diabetes, unspecified |
| 48078 | Acute painful diabetic neuropathy                            | Diabetes, unspecified |
| 48310 | [V]Admitted for commencement of insulin                      | Diabetes, unspecified |
| 49640 | O/E - left chronic diabetic foot ulcer                       | Diabetes, unspecified |
| 49884 | Diabetic pre-pregnancy counselling                           | Diabetes, unspecified |
| 50175 | Diabetic foot risk assessment                                | Diabetes, unspecified |
| 50972 | Diabetes mellitus NOS with no mention of complication        | Diabetes, unspecified |
| 51939 | [V]Admitted for conversion to insulin                        | Diabetes, unspecified |
| 52041 | O/E - left eye stable treated prolif diabetic retinopathy    | Diabetes, unspecified |
| 52212 | [X]Diabetes mellitus                                         | Diabetes, unspecified |
| 52237 | Patient held diabetic record issued                          | Diabetes, unspecified |
| 52630 | O/E - sight threatening diabetic retinopathy                 | Diabetes, unspecified |
| 53630 | Insulin coma                                                 | Diabetes, unspecified |
| 53634 | [D]Gangrene of toe in diabetic                               | Diabetes, unspecified |
| 55431 | Pre-existing diabetes mellitus, unspecified                  | Diabetes, unspecified |
| 57333 | Diabetic cheirography                                        | Diabetes, unspecified |
| 57389 | Patient consent given for addition to diabetic register      | Diabetes, unspecified |
| 57723 | Referral to diabetic register                                | Diabetes, unspecified |
| 59288 | Other specified diabetes mellitus with coma                  | Diabetes, unspecified |
| 59903 | Diabetic amyotrophy                                          | Diabetes, unspecified |
| 61021 | Diabetic digital retinopathy screening offered               | Diabetes, unspecified |
| 61461 | Informed consent for diabetes national audit                 | Diabetes, unspecified |
| 61523 | Other specified diabetes mellitus with neurological comps    | Diabetes, unspecified |
| 61670 | Diab mellit insulin-glucose infus acute myocardial infarct   | Diabetes, unspecified |
| 62384 | O/E - right chronic diabetic foot ulcer                      | Diabetes, unspecified |
| 63412 | Diabetes clinical management plan                            | Diabetes, unspecified |
| 64142 | Referral for diabetic retinopathy screening                  | Diabetes, unspecified |
| 64283 | Other specified diabetes mellitus with unspecified comps     | Diabetes, unspecified |
| 64357 | Diabetes mellitus NOS with unspecified complication          | Diabetes, unspecified |
| 64449 | Unspecified diabetes mellitus with multiple complications    | Diabetes, unspecified |
| 65025 | Diabetes mellitus NOS with peripheral circulatory disorder   | Diabetes, unspecified |

|        |                                                           |                       |
|--------|-----------------------------------------------------------|-----------------------|
| 65062  | Diabetes mellitus NOS with ketoacidotic coma              | Diabetes, unspecified |
| 65463  | High risk non proliferative diabetic retinopathy          | Diabetes, unspecified |
| 66274  | Insulin needles changed for each injection                | Diabetes, unspecified |
| 69152  | Insulin needles changed less than once a day              | Diabetes, unspecified |
| 70821  | Diabetes mellitus NOS with other specified manifestation  | Diabetes, unspecified |
| 72345  | Diabetes mellitus NOS with hyperosmolar coma              | Diabetes, unspecified |
| 83485  | Insulin dose changed                                      | Diabetes, unspecified |
| 90301  | Insulin needles changed daily                             | Diabetes, unspecified |
| 95994  | Diabetic foot screen                                      | Diabetes, unspecified |
| 96010  | Insulin treatment initiated                               | Diabetes, unspecified |
| 96143  | Insulin initiation - enhanced services administration     | Diabetes, unspecified |
| 99628  | [X]Glomerular disorders in diabetes mellitus              | Diabetes, unspecified |
| 100292 | [X]Unspecified diabetes mellitus with renal complications | Diabetes, unspecified |
| 101177 | Diabetic dietary review                                   | Diabetes, unspecified |
| 101728 | Diabetic on subcutaneous treatment                        | Diabetes, unspecified |
| 101881 | Impaired vision due to diabetic retinopathy               | Diabetes, unspecified |
| 102767 | Pre-conception advice for diabetes mellitus               | Diabetes, unspecified |
| 44312  | Informed dissent for diabetes national audit              | Diabetes, unspecified |
| 45250  | Under care of diabetic liaison nurse                      | Diabetes, unspecified |
| 54601  | Under care of diabetologist                               | Diabetes, unspecified |

| icd   | icd_description                                              | diab_cat         |
|-------|--------------------------------------------------------------|------------------|
| E10   | Insulin-dependent diabetes mellitus                          | Type I diabetes  |
| E10.0 | Insulin-dependent diabetes mellitus with coma                | Type I diabetes  |
| E10.1 | Insulin-dependent diabetes mellitus with ketoacidosis        | Type I diabetes  |
| E10.2 | Insulin-dependent diabetes mellitus with renal complications | Type I diabetes  |
| E10.3 | Insulin-dependent diabetes mellitus with ophthalmic comps    | Type I diabetes  |
| E10.4 | Insulin-dependent diabetes mellitus with neurological comps  | Type I diabetes  |
| E10.5 | Insulin-dependent diabetes mellitus with periph circ comps   | Type I diabetes  |
| E10.6 | Insulin-dependent diabetes mellitus with other spec comps    | Type I diabetes  |
| E10.7 | Insulin-dependent diabetes mellitus with multiple comps      | Type I diabetes  |
| E10.8 | Insulin-dependent diabetes mellitus with unspec comps        | Type I diabetes  |
| E10.9 | Insulin-dependent diabetes mellitus without complications    | Type I diabetes  |
| E11   | Non-insulin-dependent diabetes mellitus                      | Type II diabetes |
| E11.0 | Non-insulin-dependent diabetes mellitus with coma            | Type II diabetes |
| E11.1 | Non-insulin-dependent diabetes mellitus with ketoacidosis    | Type II diabetes |
| E11.2 | Non-insulin-dependent diabetes mellitus with renal comps     | Type II diabetes |
| E11.3 | Non-insulin-dependent diabetes mellitus with ophthalm comps  | Type II diabetes |
| E11.4 | Non-insulin-dependent diabetes mellitus with neuro comps     | Type II diabetes |
| E11.5 | Non-insulin-depend diabetes mellitus with periph circ comp   | Type II diabetes |
| E11.6 | Non-insulin-depend diabetes mellitus with other spec comp    | Type II diabetes |

|       |                                                              |                       |
|-------|--------------------------------------------------------------|-----------------------|
| E11.7 | Non-insulin-dependent diabetes mellitus with multiple comps  | Type II diabetes      |
| E11.8 | Non-insulin-dependent diabetes mellitus with unspec comps    | Type II diabetes      |
| E11.9 | Non-insulin-depend diabetes mellitus without complication    | Type II diabetes      |
| E14   | Unspecified diabetes mellitus                                | Diabetes, unspecified |
| E14.0 | Unspecified diabetes mellitus with coma                      | Diabetes, unspecified |
| E14.1 | Unspecified diabetes mellitus with ketoacidosis              | Diabetes, unspecified |
| E14.2 | Unspecified diabetes mellitus with renal complications       | Diabetes, unspecified |
| E14.3 | Unspecified diabetes mellitus with ophthalmic complications  | Diabetes, unspecified |
| E14.4 | Unspecified diabetes mellitus with neurological comps        | Diabetes, unspecified |
| E14.5 | Unspecified diabetes mellitus with periph circulatory comps  | Diabetes, unspecified |
| E14.6 | Unspecified diabetes mellitus with other specified comps     | Diabetes, unspecified |
| E14.7 | Unspecified diabetes mellitus with multiple complications    | Diabetes, unspecified |
| E14.8 | Unspecified diabetes mellitus with unspecified complications | Diabetes, unspecified |
| E14.9 | Unspecified diabetes mellitus without complications          | Diabetes, unspecified |
| G59.0 | Diabetic mononeuropathy                                      | Diabetes, unspecified |
| G63.2 | Diabetic polyneuropathy                                      | Diabetes, unspecified |
| H28.0 | Diabetic cataract                                            | Diabetes, unspecified |
| H36.0 | Diabetic retinopathy                                         | Diabetes, unspecified |
| M14.2 | Diabetic arthropathy                                         | Diabetes, unspecified |
| N08.3 | Glomerular disorders in diabetes mellitus                    | Diabetes, unspecified |
| O24.0 | Pre-existing diabetes mellitus, insulin-dependent            | Type I diabetes       |
| O24.1 | Pre-existing diabetes mellitus, non-insulin-dependent        | Type II diabetes      |
| O24.3 | Pre-existing diabetes mellitus, unspecified                  | Diabetes, unspecified |

## Antidiabetics

| Prodcod | Product name                                                  | Subtype | Any metform | Mono-metformin |
|---------|---------------------------------------------------------------|---------|-------------|----------------|
| 23      | metformin tablets 500mg                                       | oad     | 1           | 1              |
| 32      | gliclazide tablets 80mg                                       | oad     |             |                |
| 93      | metformin tablets 850mg                                       | oad     | 1           | 1              |
| 321     | insulin human actrapid (neutral) 40 i/u inj                   | insulin |             |                |
| 322     | humalog injection 100 iu/ml [lilly]                           | insulin |             |                |
| 469     | rosiglitazone tablets 4mg                                     | oad     |             |                |
| 479     | acarbose tablets 50mg                                         | oad     |             |                |
| 547     | glipizide tablets 2.5mg                                       | oad     |             |                |
| 548     | pioglitazone tablets 15mg                                     | oad     |             |                |
| 735     | metformin oral suspension 100mg/ml                            | oad     | 1           | 1              |
| 1253    | chlorpropamide tablets 100mg                                  | oad     |             |                |
| 1254    | glibenclamide tablets 5mg                                     | oad     |             |                |
| 1587    | monotard injection 100 units/ml [novo]                        | insulin |             |                |
| 1588    | actrapid injection 100 iu/ml [novo]                           | insulin |             |                |
| 1592    | actrapid penfill 100 iu/ml [novo]                             | insulin |             |                |
| 1593    | insulatard penfill 100 iu/ml [novo]                           | insulin |             |                |
| 1594    | actrapid novolet 100 iu/ml [novo]                             | insulin |             |                |
| 1595    | insulatard novolet 100 iu/ml [novo]                           | insulin |             |                |
| 1643    | insulin novo monotard mc 100 i/u inj                          | insulin |             |                |
| 1645    | insulin novo actrapid mc 100 i/u inj                          | insulin |             |                |
| 1649    | human actraphane injection 100 iu/ml [novo]                   | insulin |             |                |
| 1805    | mixtard 30/70 injection 100 units/ml [novo]                   | insulin |             |                |
| 1806    | penmix 30/70 penfill injection 100 iu/ml [novo]               | insulin |             |                |
| 1839    | insulin humulin i (isophane) 100 i/u inj                      | insulin |             |                |
| 1840    | humulin s injection 100 units/ml [lilly]                      | insulin |             |                |
| 1842    | pork velosulin injection 100 units/ml [novo]                  | insulin |             |                |
| 1843    | pork insulatard vial injection suspension 100 units/ml [novo] | insulin |             |                |
| 1844    | ultratard injection 100 units/ml [novo]                       | insulin |             |                |
| 1847    | chlorpropamide tablets 250mg                                  | oad     |             |                |
| 1886    | insulatard ge injection 100 iu/ml [novo]                      | insulin |             |                |
| 1964    | diamicron tablets 80mg [servier]                              | oad     |             |                |
| 1965    | tolbutamide tablets 500mg                                     | oad     |             |                |
| 2219    | glibenclamide tablets 2.5mg                                   | oad     |             |                |
| 2220    | penmix 20/80 pen [novo]                                       | insulin |             |                |
| 2221    | mixtard 30 novolet 100 iu/ml [novo]                           | insulin |             |                |
| 2373    | insulin human velosulin 100 i/u inj                           | insulin |             |                |
| 2454    | mixtard 30 penfill 100 iu/ml [novo]                           | insulin |             |                |
| 2455    | mixtard 20 novolet 100 iu/ml [novo]                           | insulin |             |                |
| 2456    | mixtard 10 novolet 100 iu/ml [novo]                           | insulin |             |                |
| 2459    | pork mixtard 30 vial injection suspension 100 units/ml [novo] | insulin |             |                |



|      |                                                                    |         |   |   |
|------|--------------------------------------------------------------------|---------|---|---|
| 2808 | insulin lentard inj                                                | insulin |   |   |
| 2812 | mixtard 40 novolet 100 iu/ml [novo]                                | insulin |   |   |
| 2928 | metformin hcl 850 mg tab                                           | oad     | 1 | 1 |
| 2929 | mixtard 30 ge injection 100 iu/ml [novo]                           | insulin |   |   |
| 3252 | metformin hcl 500 mg tab                                           | oad     | 1 | 1 |
| 3396 | penmix 10/90 penfill penfill [novo]                                | insulin |   |   |
| 3439 | penmix 10/90 pen [novo]                                            | insulin |   |   |
| 3550 | mixtard 40 penfill 100 iu/ml [novo]                                | insulin |   |   |
| 3551 | mixtard 20 penfill 100 iu/ml [novo]                                | insulin |   |   |
| 4093 | humulin m2 injection 100 units/ml [lilly]                          | insulin |   |   |
| 4129 | insulin soluble porcine injection 100 units/ml                     | insulin |   |   |
| 4163 | rapitard mc injection 100 units/ml [novo]                          | insulin |   |   |
| 4198 | humulin m3 injection 100 units/ml [lilly]                          | insulin |   |   |
| 4199 | humulin m1 injection 100 units/ml [lilly]                          | insulin |   |   |
| 4247 | insulin isophane porcine injection 100 units/ml                    | insulin |   |   |
| 4248 | insulin novo ultratard mc 100 i/u inj                              | insulin |   |   |
| 4426 | CHLORPROPAMIDE 500 MG TAB                                          | oad     |   |   |
| 4706 | velosulin vial injection solution 100 units/ml [novo]              | insulin |   |   |
| 4715 | humalog mix 25 injection 25:75; 100 units/ml [lilly]               | insulin |   |   |
| 4760 | humulin i injection 100 units/ml [lilly]                           | insulin |   |   |
| 4784 | lentard mc injection 100 units/ml [novo]                           | insulin |   |   |
| 4790 | mixtard 50 penfill 100 iu/ml [novo]                                | insulin |   |   |
| 4862 | diabetamide tablets 2.5mg [ashbourne]                              | oad     |   |   |
| 5021 | novorapid penfill injection solution 100 units/ml [novo]           | insulin |   |   |
| 5174 | acarbose tablets 100mg                                             | oad     |   |   |
| 5214 | insulin lispro human prb injection 100 iu/ml                       | insulin |   |   |
| 5227 | rosiglitazone tablets 8mg                                          | oad     |   |   |
| 5250 | insulin biphasic lispro human prb injection 25:75; 100 units/ml    | insulin |   |   |
| 5255 | mixtard 10 penfill 100 iu/ml [novo]                                | insulin |   |   |
| 5276 | glimepiride tablets 1mg                                            | oad     |   |   |
| 5316 | glimepiride tablets 4mg                                            | oad     |   |   |
| 5353 | glimepiride tablets 2mg                                            | oad     |   |   |
| 5501 | insuman basal injection 100 iu/ml [aventis]                        | insulin |   |   |
| 5621 | GLUCOBAY tablets 50mg [BAYER]                                      | oad     |   |   |
| 5627 | gliclazide modified release tablet 30mg                            | oad     |   |   |
| 5636 | glipizide tablets 5mg                                              | oad     |   |   |
| 5678 | nateglinide tablets 120mg                                          | oad     |   |   |
| 5845 | mixtard 30 innolet injection suspension 30:70; 100 units/ml [novo] | insulin |   |   |
| 5891 | insulatard flexpen injection 100 iu/ml [novo]                      | insulin |   |   |
| 5892 | novorapid flexpen injection solution 100 units/ml [novo]           | insulin |   |   |
| 5933 | mixtard 50 novolet 100 iu/ml [novo]                                | insulin |   |   |
| 5953 | insulin glargine injection 100 iu/ml                               | insulin |   |   |
| 5989 | nateglinide tablets 180mg                                          | oad     |   |   |

|      |                                                                 |         |   |   |
|------|-----------------------------------------------------------------|---------|---|---|
| 6057 | lantus injection 100 iu/ml [aventis]                            | insulin |   |   |
| 6061 | novomix 30 injection 30:70; 100 units/ml [novo]                 | insulin |   |   |
| 6209 | novorapid vial injection solution 100 units/ml [novo]           | insulin |   |   |
| 6337 | glimepiride tablets 3mg                                         | oad     |   |   |
| 6447 | insulin aspart human pyr injection 100 iu/ml                    | insulin |   |   |
| 6855 | avandamet tablets 2mg + 500mg [glaxsk pha]                      | oad     | 1 |   |
| 6958 | levemir flexpen injection solution 100 units/ml [novo]          | insulin |   |   |
| 6965 | levemir penfill injection solution 100 units/ml [novo]          | insulin |   |   |
| 7048 | metformin modified release tablet 500mg                         | oad     | 1 | 1 |
| 7166 | glucophage tablets 500mg [merck ser]                            | oad     | 1 | 1 |
| 7228 | novomix 30 flexpen injection suspension 100 units/ml [novo]     | insulin |   |   |
| 7231 | mixtard 30 penfill injection suspension 100 units/ml [novo]     | insulin |   |   |
| 7237 | lantus optiset injection solution 100 units/ml [aventis]        | insulin |   |   |
| 7266 | lantus cartridge injection solution 100 units/ml [aventis]      | insulin |   |   |
| 7267 | novomix 30 penfill injection suspension 100 units/ml [novo]     | insulin |   |   |
| 7284 | amaryl tablets 2mg [aventis]                                    | oad     |   |   |
| 7300 | mixtard 30 vial injection suspension 100 units/ml [novo]        | insulin |   |   |
| 7318 | humalog cartridge injection solution 100 units/ml [lilly]       | insulin |   |   |
| 7319 | mixtard 20 penfill injection suspension 100 units/ml [novo]     | insulin |   |   |
| 7325 | avandamet tablets 4mg + 1000mg [glaxsk pha]                     | oad     | 1 |   |
| 7332 | amaryl tablets 1mg [aventis]                                    | oad     |   |   |
| 7349 | actrapid vial injection solution 100 units/ml [novo]            | insulin |   |   |
| 7350 | insulin isophane porcine vial injection suspension 100 units/ml | insulin |   |   |
| 7375 | rosiglitazone with metformin tablets 4mg + 1000mg               | oad     | 1 |   |
| 7393 | insulin glargine cartridge injection solution 100 units/ml      | insulin |   |   |
| 7400 | insulin glargine disposable pen injection solution 100 units/ml | insulin |   |   |
| 7402 | lantus vial injection solution 100 units/ml [aventis]           | insulin |   |   |
| 7409 | amaryl tablets 3mg [aventis]                                    | oad     |   |   |
| 7537 | humulin zn injection 100 units/ml [lilly]                       | insulin |   |   |
| 7610 | glucophage tablets 850mg [merck ser]                            | oad     | 1 | 1 |
| 7744 | daonil tablets 5mg [aventis]                                    | oad     |   |   |
| 7757 | insulin neulente (zinc susp)(purified) 100 i/u inj              | insulin |   |   |
| 7763 | insulin neuphane (isophane)(purified) 100 i/u inj               | insulin |   |   |
| 7764 | insulin neusulin (neutral)(purified) 100 i/u inj                | insulin |   |   |
| 7765 | insulin neutral (human) 100 i/u inj                             | insulin |   |   |
| 7771 | human protaphane penfill 100 units/ml [novo]                    | insulin |   |   |
| 7772 | human protaphane injection 100 units/ml [novo]                  | insulin |   |   |
| 7783 | insulin isophane (human) 100 i/u inj                            | insulin |   |   |
| 7793 | humaject m3 pen 100 iu/ml [lilly]                               | insulin |   |   |
| 7815 | metformin 800 mg tab                                            | oad     | 1 | 1 |
| 7861 | insulin humulin s (neutral) cartridge 100 i/u                   | insulin |   |   |
| 7912 | semi-daonil tablets 2.5mg [aventis]                             | oad     |   |   |
| 7959 | insulin mixtard 30/70 40 i/u inj                                | insulin |   |   |

|       |                                                                                                  |         |  |  |
|-------|--------------------------------------------------------------------------------------------------|---------|--|--|
| 8034  | diabinese tablets 100mg [pfizer]                                                                 | oad     |  |  |
| 8118  | humaject i pen 100 iu/ml [lilly]                                                                 | insulin |  |  |
| 8168  | diabinese tablets 250mg [pfizer]                                                                 | oad     |  |  |
| 8203  | penmix 50/50 penfill injection 100 iu/ml [novo]                                                  | insulin |  |  |
| 8322  | insulin zinc suspension mixed human pyr injection 100 units/ml                                   | insulin |  |  |
| 8354  | insulin isophane 70%/neutral 30% 100 i/u inj                                                     | insulin |  |  |
| 8376  | insulin isophane 100 i/u                                                                         | insulin |  |  |
| 8390  | gliquidone tablets 30mg                                                                          | oad     |  |  |
| 8483  | MONOJECT INSULIN NEEDLES                                                                         | insulin |  |  |
| 8646  | insulin zinc crystalline susp 100 i/u inj                                                        | insulin |  |  |
| 8838  | insulin semitard 40 i/u inj                                                                      | insulin |  |  |
| 8839  | insulin semitard 100 i/u inj                                                                     | insulin |  |  |
| 8841  | humulin m5 injection 100 units/ml [lilly]                                                        | insulin |  |  |
| 8895  | initard 50/50 injection 100 units/ml [novo]                                                      | insulin |  |  |
| 8976  | euglucon tablets 2.5mg [aventis]                                                                 | oad     |  |  |
| 9079  | insulin soluble 100 i/u inj                                                                      | insulin |  |  |
| 9105  | GLUCOBAY tablets 100mg [BAYER]                                                                   | oad     |  |  |
| 9108  | tolbutamide 250 mg tab                                                                           | oad     |  |  |
| 9341  | insulin biphasic isophane human prb injection 30:70; 100 units/ml                                | insulin |  |  |
| 9376  | insulin zinc suspension crystalline human pyr - long acting injection 100 units/ml               | insulin |  |  |
| 9503  | hypurin bovine protamine zinc vial injection suspension 100 units/ml [wockhardt]                 | insulin |  |  |
| 9521  | pork actrapid vial injection solution 100 units/ml [novo]                                        | insulin |  |  |
| 9565  | humaject s disposable pen injection solution 100 units/ml [lilly]                                | insulin |  |  |
| 9618  | hypurin porcine 30/70 mix injection 100 iu/ml [wockhardt]                                        | insulin |  |  |
| 9662  | avandia tablets 4mg [glaxsk pha]                                                                 | oad     |  |  |
| 9699  | pioglitazone tablets 30mg                                                                        | oad     |  |  |
| 9707  | repaglinide tablets 1mg                                                                          | oad     |  |  |
| 9737  | insulatard innolet injection 100 iu/ml [novo]                                                    | insulin |  |  |
| 9748  | repaglinide tablets 2mg                                                                          | oad     |  |  |
| 9865  | repaglinide tablets 500 micrograms                                                               | oad     |  |  |
| 10001 | humalog mix 50 disposable pen injection suspension 100 units/ml [lilly]                          | insulin |  |  |
| 10051 | pioglitazone tablets 45mg                                                                        | oad     |  |  |
| 10067 | insulin biphasic aspart human pyr injection 30:70; 100 units/ml                                  | insulin |  |  |
| 10145 | Humapen luxura insulin pen 3ml/1-60 units Insulin pen 3ml/1-60 units (Eli Lilly and Company Ltd) | insulin |  |  |
| 10175 | insulin isophane human pyr injection 100 iu/ml                                                   | insulin |  |  |
| 10184 | insulin detemir injection solution 100 iu/ml                                                     | insulin |  |  |
| 10207 | insulin isophane human cartridge injection suspension 100 units/ml                               | insulin |  |  |
| 10208 | insulatard innolet injection suspension 100 units/ml [novo]                                      | insulin |  |  |
| 10225 | lantus opticlik injection solution 100 units/ml [aventis]                                        | insulin |  |  |
| 10229 | humulin i disposable pen injection suspension 100 units/ml [lilly]                               | insulin |  |  |

|       |                                                                    |         |   |   |
|-------|--------------------------------------------------------------------|---------|---|---|
| 10243 | humalog mix 25 cartridge injection suspension 100 units/ml [lilly] | insulin |   |   |
| 10244 | mixtard 40 penfill injection suspension 100 units/ml [novo]        | insulin |   |   |
| 10245 | mixtard 10 penfill injection suspension 100 units/ml [novo]        | insulin |   |   |
| 10259 | insulin glargine vial injection solution 100 units/ml              | insulin |   |   |
| 10264 | humalog disposable pen injection solution 100 units/ml [lilly]     | insulin |   |   |
| 10277 | humulin m3 cartridge injection suspension 100 units/ml [lilly]     | insulin |   |   |
| 10427 | tolazamide tablets 250mg                                           | oad     |   |   |
| 10484 | penmix 20/80 penfill penfill [novo]                                | insulin |   |   |
| 10545 | insulin humulin m4 cartridge 100 i/u                               | insulin |   |   |
| 10546 | insulin humulin m4 100 i/u inj                                     | insulin |   |   |
| 10547 | humulin lente injection 100 units/ml [lilly]                       | insulin |   |   |
| 10566 | insulin humulin m cartridge 100 i/u                                | insulin |   |   |
| 10572 | insulin soluble bovine injection 100 units/ml                      | insulin |   |   |
| 10691 | insulin isophane (nph) 100 i/u inj                                 | insulin |   |   |
| 10887 | penmix 40/60 penfill injection 100 iu/ml [novo]                    | insulin |   |   |
| 10910 | humaject m2 pen 100 iu/ml [lilly]                                  | insulin |   |   |
| 10915 | humaject m1 pen 100 iu/ml [lilly]                                  | insulin |   |   |
| 11055 | insulin biphasic isophane human pyr injection 20:80; 100 units/ml  | insulin |   |   |
| 11056 | insulin biphasic isophane human pyr injection 30:70; 100 units/ml  | insulin |   |   |
| 11080 | insulin isophane human prb injection 100 iu/ml                     | insulin |   |   |
| 11107 | humulin m4 injection 100 units/ml [lilly]                          | insulin |   |   |
| 11284 | amaryl tablets 4mg [aventis]                                       | oad     |   |   |
| 11316 | novonorm tablets 500 micrograms [novo]                             | oad     |   |   |
| 11321 | novonorm tablets 1mg [novo]                                        | oad     |   |   |
| 11337 | novorapid novolet injection 100 iu/ml [novo]                       | insulin |   |   |
| 11366 | novonorm tablets 2mg [novo]                                        | oad     |   |   |
| 11483 | nateglinide tablets 60mg                                           | oad     |   |   |
| 11601 | rosiglitazone with metformin tablets 2mg + 500mg                   | oad     | 1 |   |
| 11604 | rosiglitazone with metformin tablets 1mg + 500mg                   | oad     | 1 |   |
| 11609 | metformin with rosiglitazone tablets 500mg + 1mg                   | oad     | 1 |   |
| 11610 | metformin with rosiglitazone tablets 500mg + 2mg                   | oad     | 1 |   |
| 11695 | diamicron mr tablets 30mg [servier]                                | oad     |   |   |
| 11717 | rosiglitazone with metformin tablets 2mg + 1000mg                  | oad     | 1 |   |
| 11737 | metformin with rosiglitazone tablets 1000mg + 4mg                  | oad     | 1 |   |
| 11760 | metformin with rosiglitazone tablets 1000mg + 2mg                  | oad     | 1 |   |
| 11946 | tolbutamide injection 50mg/ml                                      | oad     |   |   |
| 11990 | metformin oral solution 500mg/5ml                                  | oad     | 1 | 1 |
| 12035 | insulin zinc lente bovine vial injection suspension 100 units/ml   | insulin |   |   |
| 12060 | insulin quicksol (soluble neutral) 100 i/u inj                     | insulin |   |   |
| 12244 | insulin zinc bovine susp 100 i/u inj                               | insulin |   |   |
| 12245 | glutril tablets 25mg [roche]                                       | oad     |   |   |
| 12259 | glibornuride tablets 25mg                                          | oad     |   |   |
| 12297 | hypurin bovine neutral injection 100 units/ml [cp pharm]           | insulin |   |   |

|       |                                                                               |         |   |  |
|-------|-------------------------------------------------------------------------------|---------|---|--|
| 12299 | semitard mc injection 100 units/ml [novo]                                     | insulin |   |  |
| 12300 | SYRINGE INSULIN (BS1619/1) 2ML                                                | insulin |   |  |
| 12455 | rastinon tablets 500mg [hoechstmar]                                           | oad     |   |  |
| 12513 | glibenese tablets 5mg [pfizer]                                                | oad     |   |  |
| 12638 | insulin soluble human pyr injection 100 units/ml                              | insulin |   |  |
| 12654 | insulin soluble human prb injection 100 units/ml                              | insulin |   |  |
| 12818 | mixtard 50 injection 50:50; 100 units/ml [novo]                               | insulin |   |  |
| 13277 | mixtard 50 penfill injection suspension 100 units/ml [novo]                   | insulin |   |  |
| 13331 | euglucon tablets 5mg [aventis]                                                | oad     |   |  |
| 13416 | insulin biphasic injection 100 units/ml                                       | insulin |   |  |
| 13516 | hypurin bovine isophane injection 100 units/ml [cp pharm]                     | insulin |   |  |
| 13550 | insulin bp 100 i/u                                                            | insulin |   |  |
| 13622 | hypurin porcine neutral injection 100 units/ml [cp pharm]                     | insulin |   |  |
| 13628 | romozin tablets 400mg [glaxo]                                                 | oad     |   |  |
| 13729 | insulin isophane human emp injection 100 units/ml                             | insulin |   |  |
| 13819 | hypurin porcine isophane injection 100 units/ml [wockhardt]                   | insulin |   |  |
| 13837 | insulin biphasic isophane human prb injection 10:90; 100 units/ml             | insulin |   |  |
| 14164 | avandamet tablets 2mg + 1000mg [glaxsk pha]                                   | oad     | 1 |  |
| 14270 | humalog mix 25 disposable pen injection suspension 100 units/ml [lilly]       | insulin |   |  |
| 14290 | insulatard penfill injection suspension 100 units/ml [novo]                   | insulin |   |  |
| 14299 | insulin glulisine cartridge injection solution 100 units/ml                   | insulin |   |  |
| 14301 | insulin detemir cartridge injection solution 100 units/ml                     | insulin |   |  |
| 14313 | insulin lispro cartridge injection solution 100 units/ml                      | insulin |   |  |
| 14330 | insulin detemir disposable pen injection solution 100 units/ml                | insulin |   |  |
| 14339 | hypurin bovine neutral vial injection solution 100 units/ml [wockhardt]       | insulin |   |  |
| 14340 | hypurin bovine isophane vial injection suspension 100 units/ml [wockhardt]    | insulin |   |  |
| 14345 | apidra cartridge injection solution 100 units/ml [sanofi/ave]                 | insulin |   |  |
| 14357 | humulin i cartridge injection suspension 100 units/ml [lilly]                 | insulin |   |  |
| 14362 | insulin lispro disposable pen injection solution 100 units/ml                 | insulin |   |  |
| 14504 | insulin hypurin protamine zinc 100 i/u inj                                    | insulin |   |  |
| 14505 | insulin protamine zinc bovine vial injection suspension 100 units/ml          | insulin |   |  |
| 14506 | insulin bovine protamine zinc 100 i/u inj                                     | insulin |   |  |
| 14619 | insulin biphasic isophane porcine injection 30:70; 100 units/ml               | insulin |   |  |
| 14644 | insulin biphasic isophane human prb injection 20:80; 100 units/ml             | insulin |   |  |
| 14649 | insulin biphasic isophane human pyr injection 10:90; 100 units/ml             | insulin |   |  |
| 14918 | humulin i vial injection suspension 100 units/ml [lilly]                      | insulin |   |  |
| 14925 | insulin isophane human vial injection suspension 100 units/ml                 | insulin |   |  |
| 14928 | insulatard vial injection suspension 100 units/ml [novo]                      | insulin |   |  |
| 14930 | hypurin porcine neutral cartridge injection solution 100 units/ml [wockhardt] | insulin |   |  |

|       |                                                                                            |         |   |   |
|-------|--------------------------------------------------------------------------------------------|---------|---|---|
| 14933 | hypurin porcine isophane cartridge injection suspension 100 units/ml [wockhardt]           | insulin |   |   |
| 14938 | insulin soluble bovine cartridge injection solution 100 units/ml                           | insulin |   |   |
| 14944 | humulin s cartridge injection solution 100 units/ml [lilly]                                | insulin |   |   |
| 15040 | insulin monophane (isophane) 100 i/u inj                                                   | insulin |   |   |
| 15199 | insuman comb 25 injection 100 iu/ml [aventis]                                              | insulin |   |   |
| 15232 | avandia tablets 8mg [glaxsk pha]                                                           | oad     |   |   |
| 15374 | gliclazide oral suspension 40mg/5ml                                                        | oad     |   |   |
| 15484 | insulin isophane bovine injection 100 units/ml                                             | insulin |   |   |
| 15624 | insulin isophane (highly purified) 100 i/u inj                                             | insulin |   |   |
| 15710 | insulin soluble human emp injection 100 units/ml                                           | insulin |   |   |
| 15955 | starlix tablets 120mg [novartis]                                                           | oad     |   |   |
| 15961 | insulin isophane human crb injection 100 iu/ml                                             | insulin |   |   |
| 16044 | glucophage sr tablets 500mg [merck ser]                                                    | oad     |   |   |
| 16129 | insulin soluble human cartridge injection solution 100 units/ml                            | insulin |   |   |
| 16142 | insulin aspart cartridge injection solution 100 units/ml                                   | insulin |   |   |
| 16152 | insulin biphasic isophane human cartridge injection suspension 30:70; 100 units/ml         | insulin |   |   |
| 16160 | humulin m3 disposable pen injection suspension 100 units/ml [lilly]                        | insulin |   |   |
| 16209 | insulin hypurin soluble 100 i/u inj                                                        | insulin |   |   |
| 16211 | tolbutamide 100 mg tab                                                                     | oad     |   |   |
| 16213 | metformin 250 mg tab                                                                       | oad     | 1 | 1 |
| 16602 | calabren tablets 2.5mg [berk]                                                              | oad     |   |   |
| 16682 | tempulin injection 100 units/ml [knoll]                                                    | insulin |   |   |
| 16700 | insulin zinc mixed bovine vial injection suspension 100 units/ml                           | insulin |   |   |
| 17336 | novopen injection device 100 units/ml [novo]                                               | insulin |   |   |
| 17343 | gliclazide tablets 80mg [hillcross]                                                        | oad     |   |   |
| 17580 | avandamet tablets 1mg + 500mg [glaxsk pha]                                                 | oad     | 1 |   |
| 17698 | minodiab tablets 5mg [pharmacia]                                                           | oad     |   |   |
| 17706 | minodiab tablets 2.5mg [pharmacia]                                                         | oad     |   |   |
| 17712 | hypurin bovine lente vial injection suspension 100 units/ml [wockhardt]                    | insulin |   |   |
| 17731 | penmix 50/50 injection 100 iu/ml [novo]                                                    | insulin |   |   |
| 17809 | humaject m4 pen 100 iu/ml [lilly]                                                          | insulin |   |   |
| 18220 | pioglitazone with metformin tablets 15mg + 850mg                                           | oad     | 1 |   |
| 18224 | humalog vial injection solution 100 units/ml [lilly]                                       | insulin |   |   |
| 18301 | insulin soluble inj i/u <sup>2</sup>                                                       | insulin |   |   |
| 18461 | insulin zinc suspension mixed human prb injection 100 units/ml                             | insulin |   |   |
| 18590 | insulin isophane bovine vial injection suspension 100 units/ml                             | insulin |   |   |
| 18592 | insulin soluble bovine vial injection solution 100 units/ml                                | insulin |   |   |
| 18593 | humalog mix 50 cartridge injection suspension 100 units/ml [lilly]                         | insulin |   |   |
| 18645 | insulin neutral (purified) 100 i/u inj                                                     | insulin |   |   |
| 18931 | insulin zinc suspension crystalline human prb - intermediate acting injection 100 units/ml | insulin |   |   |

|       |                                                                                         |         |   |   |
|-------|-----------------------------------------------------------------------------------------|---------|---|---|
| 19029 | SYRINGE PRE-SET INSULIN FOR BLIND 2ML                                                   | insulin |   |   |
| 19336 | tolazamide tablets 100mg                                                                | oad     |   |   |
| 19472 | actos tablets 45mg [takeda]                                                             | oad     |   |   |
| 19491 | apidra vial injection solution 100 units/ml [sanofi/ave]                                | insulin |   |   |
| 19513 | humulin m3 vial injection suspension 100 units/ml [lilly]                               | insulin |   |   |
| 19658 | glurenorm tablets 30mg [sanofi s]                                                       | oad     |   |   |
| 19707 | insulin humulin s (neutral soluble)                                                     | insulin |   |   |
| 19829 | insulin novo monotard mc                                                                | insulin |   |   |
| 19877 | insulin aspart disposable pen injection solution 100 units/ml                           | insulin |   |   |
| 19878 | insulin biphasic isophane human disposable pen injection suspension 30:70; 100 units/ml | insulin |   |   |
| 20195 | insulin bovine protamine zinc 40 i/u inj                                                | insulin |   |   |
| 20196 | insulin soluble 40 i/u inj                                                              | insulin |   |   |
| 20287 | actos tablets 15mg [takeda]                                                             | oad     |   |   |
| 20422 | insuman comb 15 injection 100 iu/ml [aventis]                                           | insulin |   |   |
| 20671 | insulin hum/actraphane                                                                  | insulin |   |   |
| 20672 | insulin hum/actrapid                                                                    | insulin |   |   |
| 20810 | metformin                                                                               | oad     | 1 | 1 |
| 20889 | actos tablets 30mg [takeda]                                                             | oad     |   |   |
| 20995 | hypurin porcine 30/70 mix cartridge injection suspension 100 units/ml [wockhardt]       | insulin |   |   |
| 21110 | insulin biphasic isophane human prb injection 50:50; 100 units/ml                       | insulin |   |   |
| 21232 | insulin biphasic isophane human vial injection suspension 30:70; 100 units/ml           | insulin |   |   |
| 21235 | humulin s vial injection solution 100 units/ml [lilly]                                  | insulin |   |   |
| 21347 | penmix 40/60 injection 100 iu/ml [novo]                                                 | insulin |   |   |
| 21374 | insulin biphasic isophane human prb injection 40:60; 100 units/ml                       | insulin |   |   |
| 21395 | insulin biphasic isophane human pyr injection 40:60; 100 units/ml                       | insulin |   |   |
| 21422 | insulin biphasic isophane human cartridge injection suspension 40:60; 100 units/ml      | insulin |   |   |
| 21424 | glibenclamide oral suspension 5mg/5ml                                                   | oad     |   |   |
| 21459 | SYRINGE INSULIN U100 S/U+8MM NEEDLE                                                     | insulin |   |   |
| 21489 | tolanase tablets 250mg [pharmacia]                                                      | oad     |   |   |
| 21554 | insuman comb 50 injection 100 iu/ml [aventis]                                           | insulin |   |   |
| 21564 | gliclazide tablets 80mg [wockhardt]                                                     | oad     |   |   |
| 21583 | apidra optiset injection solution 100 units/ml [sanofi/ave]                             | insulin |   |   |
| 21590 | insulin glulisine disposable pen injection solution 100 units/ml                        | insulin |   |   |
| 21832 | diabetamide tablets 5mg [ashbourne]                                                     | oad     |   |   |
| 21870 | RASTINON                                                                                | oad     |   |   |
| 21892 | diaglyk tablets 80mg [ashbourne]                                                        | oad     |   |   |
| 21945 | insulin pork insulatard                                                                 | insulin |   |   |
| 22058 | pur-in mix 15/85 injection [cp pharm]                                                   | insulin |   |   |
| 22094 | insulin humulin m2 vial                                                                 | insulin |   |   |
| 22145 | tolanase tablets 100mg [pharmacia]                                                      | oad     |   |   |

|       |                                                                                    |         |   |   |
|-------|------------------------------------------------------------------------------------|---------|---|---|
| 22155 | humaject m5 pen 100 iu/ml [lilly]                                                  | insulin |   |   |
| 22161 | insulin humulin m1 vial                                                            | insulin |   |   |
| 22496 | insulin zinc lente purified suspension                                             | insulin |   |   |
| 22614 | DAONIL 10 MG TAB                                                                   | oad     |   |   |
| 22636 | tolbutamide 1 gm tab                                                               | oad     |   |   |
| 22697 | insulin biphasic isophane human pyr injection 50:50; 100 units/ml                  | insulin |   |   |
| 22806 | insulin pork actrapid                                                              | insulin |   |   |
| 22823 | insulin isophane (purified) 100 i/u inj                                            | insulin |   |   |
| 22858 | acetoexamide tablets 500mg                                                         | oad     |   |   |
| 22945 | insuman rapid injection 100 iu/ml [aventis]                                        | insulin |   |   |
| 22983 | insuman rapid cartridge injection solution 100 units/ml [aventis]                  | insulin |   |   |
| 23003 | insulin isophane (nph) 40 i/u                                                      | insulin |   |   |
| 23099 | insulin biphasic aspart disposable pen injection suspension 30:70; 100 units/ml    | insulin |   |   |
| 23231 | hypurin bovine neutral cartridge injection solution 100 units/ml [wockhardt]       | insulin |   |   |
| 23945 | starlix tablets 60mg [novartis]                                                    | oad     |   |   |
| 23992 | insuman basal optiset injection suspension 100 units/ml [aventis]                  | insulin |   |   |
| 23993 | insuman rapid optiset injection solution 100 units/ml [aventis]                    | insulin |   |   |
| 24002 | insuman comb 25 vial injection suspension 100 units/ml [aventis]                   | insulin |   |   |
| 24485 | insulin zinc animal suspension                                                     | insulin |   |   |
| 24593 | neutral insulin bovine injection 100 iu/ml                                         | insulin |   |   |
| 24722 | insulin isophane 50%/neutral 50% 100 i/u inj                                       | insulin |   |   |
| 24795 | insulin biphasic aspart cartridge injection suspension 30:70; 100 units/ml         | insulin |   |   |
| 24800 | hypurin porcine 30/70 mix vial injection suspension 100 units/ml [wockhardt]       | insulin |   |   |
| 24845 | insulin pur-in isophane 100 i/u inj                                                | insulin |   |   |
| 24846 | pur-in neutral injection 100 units/ml [cp pharm]                                   | insulin |   |   |
| 24848 | glymidine sodium tablets 500mg                                                     | oad     |   |   |
| 24866 | insulin insulatard (leo retard) 40 i/u inj                                         | insulin |   |   |
| 24993 | insuman comb 25 cartridge injection suspension 100 units/ml [aventis]              | insulin |   |   |
| 25006 | insulin human actrapid (neutral)                                                   | insulin |   |   |
| 25133 | insuman comb 25 optiset injection suspension 100 units/ml [aventis]                | insulin |   |   |
| 25479 | insulin soluble porcine cartridge injection solution 100 units/ml                  | insulin |   |   |
| 25636 | libanil tablets 2.5mg [aps]                                                        | oad     |   |   |
| 25678 | glucamet tablets 500mg [opus]                                                      | oad     | 1 | 1 |
| 25735 | insulin biphasic isophane human cartridge injection suspension 20:80; 100 units/ml | insulin |   |   |
| 25736 | insulin biphasic isophane human cartridge injection suspension 10:90; 100 units/ml | insulin |   |   |
| 25812 | insulin isophane human disposable pen injection suspension 100 units/ml            | insulin |   |   |
| 26060 | insulin lispro vial injection solution 100 units/ml                                | insulin |   |   |



|       |                                                                                    |         |   |   |
|-------|------------------------------------------------------------------------------------|---------|---|---|
| 26098 | hypurin porcine neutral vial injection solution 100 units/ml [wockhardt]           | insulin |   |   |
| 26118 | dimelor tablets 500mg [lilly]                                                      | oad     |   |   |
| 26218 | calabren tablets 5mg [berk]                                                        | oad     |   |   |
| 26258 | glucamet tablets 850mg [opus]                                                      | oad     | 1 | 1 |
| 26403 | pur-in mix 25/75 injection [cp pharm]                                              | insulin |   |   |
| 26498 | insulin zinc suspension mixed bovine and porcine injection 100 units/ml            | insulin |   |   |
| 26621 | insulin soluble human crb injection 100 iu/ml                                      | insulin |   |   |
| 26784 | insulin zinc semilente susp bp 100 i/u inj                                         | insulin |   |   |
| 26795 | SYRINGE INSULIN DISPOSABLE                                                         | insulin |   |   |
| 27125 | starlix tablets 180mg [novartis]                                                   | oad     |   |   |
| 27151 | SYRINGE INSULIN U100 S/U+8MM NEEDLE                                                | insulin |   |   |
| 27177 | insulin biphasic lispro human prb injection 50:50; 100 units/ml                    | insulin |   |   |
| 27280 | insulin biphasic isophane porcine vial injection suspension 30:70; 100 units/ml    | insulin |   |   |
| 27396 | insulin soluble porcine vial injection solution 100 units/ml                       | insulin |   |   |
| 27402 | insulin soluble human vial injection solution 100 units/ml                         | insulin |   |   |
| 27461 | insuman basal cartridge injection suspension 100 units/ml [aventis]                | insulin |   |   |
| 27501 | orabet tablets 500mg [lagap]                                                       | oad     |   |   |
| 27614 | penmix 30/70 injection 100 iu/ml [novo]                                            | insulin |   |   |
| 27911 | insulin human actrapid penfill                                                     | insulin |   |   |
| 27969 | glymese tablets 250mg [ddsa]                                                       | oad     |   |   |
| 28096 | insulin biphasic isophane human cartridge injection suspension 50:50; 100 units/ml | insulin |   |   |
| 28101 | insulin glulisine vial injection solution 100 units/ml                             | insulin |   |   |
| 28183 | hypurin porcine isophane vial injection suspension 100 units/ml [wockhardt]        | insulin |   |   |
| 28185 | insulin biphasic lispro cartridge injection suspension 25:75; 100 units/ml         | insulin |   |   |
| 28442 | insulin glulisine injection solution 100 units/ml                                  | insulin |   |   |
| 28588 | hypurin bovine isophane cartridge injection suspension 100 units/ml [wockhardt]    | insulin |   |   |
| 28708 | malix tablets 2.5mg [lagap]                                                        | oad     |   |   |
| 28723 | insulin zinc bovine suspension                                                     | insulin |   |   |
| 28978 | insulin pur-in mix 15/85 100 i/u inj                                               | insulin |   |   |
| 29326 | glipizide tablets 5mg [gen (uk)]                                                   | oad     |   |   |
| 29567 | insulin aspart vial injection solution 100 units/ml                                | insulin |   |   |
| 29837 | insulin biphasic isophane human prb injection 25:75; 100 units/ml                  | insulin |   |   |
| 29939 | gliclazide tablets 80mg [gen (uk)]                                                 | oad     |   |   |
| 29953 | apidra optick injection solution 100 units/ml [sanofi/ave]                         | insulin |   |   |
| 30209 | actrapid mc injection 100 units/ml [arun]                                          | insulin |   |   |
| 30236 | isophane insulin injection 100 iu/ml                                               | insulin |   |   |
| 30316 | metformin with pioglitazone tablets 850mg + 15mg                                   | oad     | 1 |   |
| 30460 | malix tablets 5mg [lagap]                                                          | oad     |   |   |

|       |                                                                                 |         |   |   |
|-------|---------------------------------------------------------------------------------|---------|---|---|
| 30686 | insulin isophane porcine cartridge injection suspension 100 units/ml            | insulin |   |   |
| 30819 | insuman comb 15 optiset injection suspension 100 units/ml [aventis]             | insulin |   |   |
| 30861 | insulin zinc human suspension                                                   | insulin |   |   |
| 31077 | competact film coated tablets [takeda]                                          | oad     | 1 |   |
| 31146 | metsol oral solution 500mg/5ml [orbis]                                          | oad     | 1 | 1 |
| 31205 | insuman comb 50 optiset injection suspension 100 units/ml [aventis]             | insulin |   |   |
| 31212 | gliclazide tablets 80mg [actavis]                                               | oad     |   |   |
| 31258 | insulin biphasic lispro disposable pen injection suspension 25:75; 100 units/ml | insulin |   |   |
| 31267 | insulin pur-in mix 50/50 100 i/u inj                                            | insulin |   |   |
| 31464 | Exubera kit (Pfizer Ltd)                                                        | insulin |   |   |
| 31465 | exubera powder for inhalation 1mg [pfizer]                                      | insulin |   |   |
| 31467 | exubera powder for inhalation 3mg [pfizer]                                      | insulin |   |   |
| 31474 | libanil tablets 5mg [aps]                                                       | oad     |   |   |
| 32053 | insulin humalog mix 25                                                          | insulin |   |   |
| 33087 | metformin tablets 500mg [actavis]                                               | oad     | 1 | 1 |
| 33167 | insulin biphasic isophane human crb injection 25:75; 100 units/ml               | insulin |   |   |
| 33232 | insulin biphasic isophane human crb injection 50:50; 100 units/ml               | insulin |   |   |
| 33562 | duclazide tablets 80mg [dumex]                                                  | oad     |   |   |
| 33673 | tolbutamide tablets 500mg [actavis]                                             | oad     |   |   |
| 33674 | metformin tablets 850mg [hillcross]                                             | oad     | 1 | 1 |
| 33966 | insulatard injection 100 units/ml [novo]                                        | insulin |   |   |
| 34004 | metformin tablets 500mg [ivax]                                                  | oad     | 1 | 1 |
| 34020 | metformin tablets 850mg [ivax]                                                  | oad     | 1 | 1 |
| 34031 | monotard mc injection 100 units/ml [novo]                                       | insulin |   |   |
| 34097 | human initar 50/50 injection 100 units/ml [novo]                                | insulin |   |   |
| 34135 | metformin tablets 500mg [m&a pharm]                                             | oad     | 1 | 1 |
| 34323 | metformin tablets 500mg [hillcross]                                             | oad     | 1 | 1 |
| 34399 | gliclazide tablets 80mg [ivax]                                                  | oad     |   |   |
| 34504 | metformin tablets 500mg [wockhardt]                                             | oad     | 1 | 1 |
| 34507 | glibenclamide tablets 2.5mg [wockhardt]                                         | oad     |   |   |
| 34563 | glibenclamide tablets 5mg [wockhardt]                                           | oad     |   |   |
| 34598 | metformin tablets 500mg [gen (uk)]                                              | oad     | 1 | 1 |
| 34676 | glibenclamide tablets 2.5mg [hillcross]                                         | oad     |   |   |
| 34697 | metformin tablets 850mg [wockhardt]                                             | oad     | 1 | 1 |
| 34706 | glibenclamide tablets 2.5mg [ivax]                                              | oad     |   |   |
| 34742 | metformin tablets 850mg [teva]                                                  | oad     | 1 | 1 |
| 34802 | glipizide tablets 5mg [ivax]                                                    | oad     |   |   |
| 34836 | metformin tablets 850mg [actavis]                                               | oad     | 1 | 1 |
| 34917 | metformin tablets 500mg [teva]                                                  | oad     | 1 | 1 |
| 34932 | gliclazide tablets 80mg [genus]                                                 | oad     |   |   |

|       |                                                                                      |         |   |   |
|-------|--------------------------------------------------------------------------------------|---------|---|---|
| 34957 | tolbutamide tablets 500mg [hillcross]                                                | oad     |   |   |
| 35022 | sitagliptin tablets 100mg                                                            | oad     |   |   |
| 35144 | byetta injection 5 micrograms [lilly]                                                | oad     |   |   |
| 35149 | exenatide injection 10micrograms                                                     | oad     |   |   |
| 35150 | byetta injection 10micrograms [lilly]                                                | oad     |   |   |
| 35251 | exenatide injection 5 micrograms                                                     | oad     |   |   |
| 35253 | insuman comb 50 cartridge injection suspension 100 units/ml [aventis]                | insulin |   |   |
| 35260 | levemir innolet injection solution 100 units/ml [novo]                               | insulin |   |   |
| 35462 | januvia tablets 100mg [m s d]                                                        | oad     |   |   |
| 35468 | insuman basal vial injection suspension 100 units/ml [aventis]                       | insulin |   |   |
| 35561 | prandin tablets 2mg [novo]                                                           | oad     |   |   |
| 35701 | insulin biphasic lispro disposable pen injection suspension 50:50; 100 units/ml      | insulin |   |   |
| 36031 | insulin biphasic isophane porcine cartridge injection suspension 30:70; 100 units/ml | insulin |   |   |
| 36043 | Exubera chamber (Pfizer Ltd)                                                         | insulin |   |   |
| 36066 | insulin isophane bovine cartridge injection suspension 100 units/ml                  | insulin |   |   |
| 36146 | insulin biphasic lispro cartridge injection suspension 50:50; 100 units/ml           | insulin |   |   |
| 36194 | insulin biphasic isophane human cartridge injection suspension 25:75; 100 units/ml   | insulin |   |   |
| 36355 | insulin human powder for inhalation 1mg                                              | insulin |   |   |
| 36356 | insulin human powder for inhalation 3mg                                              | insulin |   |   |
| 36430 | insulin soluble human disposable pen injection solution 100 units/ml                 | insulin |   |   |
| 36513 | velosulin cartridge injection 100 units/ml [novo]                                    | insulin |   |   |
| 36774 | prandin tablets 1mg [novo]                                                           | oad     |   |   |
| 36853 | lantus solostar injection solution 100 units/ml [sanofi/ave]                         | insulin |   |   |
| 36856 | gliclazide tablets 80mg [sandoz]                                                     | oad     |   |   |
| 36920 | apidra solostar injection solution 100 units/ml [sanofi/ave]                         | insulin |   |   |
| 36948 | prandin tablets 500 micrograms [novo]                                                | oad     |   |   |
| 37617 | rosiglitazone tablets 2mg                                                            | oad     |   |   |
| 37874 | vildagliptin with metformin tablets 50mg + 850mg                                     | oad     | 1 |   |
| 37875 | vildagliptin tablets 50mg                                                            | oad     |   |   |
| 37902 | vildagliptin with metformin tablets 50mg + 1000mg                                    | oad     | 1 |   |
| 38355 | metformin modified release tablet 750mg                                              | oad     | 1 | 1 |
| 38400 | glucophage sr tablets 750mg [merck ser]                                              | oad     | 1 | 1 |
| 38422 | isophane injection 100 iu/ml [celltech]                                              | insulin |   |   |
| 38551 | eucreas tablets 50mg + 1000mg [novartis]                                             | oad     | 1 |   |
| 38986 | humalog kwikpen injection solution 100 units/ml [lilly]                              | insulin |   |   |
| 39006 | humalog mix 25 kwikpen injection suspension 100 units/ml [lilly]                     | insulin |   |   |
| 39086 | humalog mix 50 kwikpen injection suspension 100 units/ml [lilly]                     | insulin |   |   |
| 39149 | galvus tablets 50mg [novartis]                                                       | oad     |   |   |
| 39203 | eucreas tablets 50mg + 850mg [novartis]                                              | oad     | 1 |   |

|       |                                                                                         |         |   |   |
|-------|-----------------------------------------------------------------------------------------|---------|---|---|
| 39560 | bolamyn sr tablets 500mg [teva]                                                         | oad     | 1 | 1 |
| 39598 | metformin modified release tablet 1000mg                                                | oad     | 1 | 1 |
| 39729 | glucophage sr tablets 1000mg [merck ser]                                                | oad     | 1 | 1 |
| 39988 | metformin oral powder 500mg                                                             | oad     | 1 | 1 |
| 40007 | glucophage sachets 1000mg [merck ser]                                                   | oad     | 1 | 1 |
| 40110 | glucophage sachets 500mg [merck ser]                                                    | oad     | 1 | 1 |
| 40233 | metformin oral powder 1000mg                                                            | oad     | 1 | 1 |
| 40365 | glimepiride tablets 1mg [actavis]                                                       | oad     |   |   |
| 40425 | nazdol mr tablets 30mg [teva]                                                           | oad     |   |   |
| 40642 | victoza injection 18mg/3ml [novo]                                                       | oad     |   |   |
| 40693 | liraglutide injection 18mg/3ml                                                          | oad     |   |   |
| 41120 | insulin biphasic isophane human disposable pen injection suspension 50:50; 100 units/ml | insulin |   |   |
| 41204 | saxagliptin tablets 5mg                                                                 | oad     |   |   |
| 41431 | onglyza tablets 5mg [bms]                                                               | oad     |   |   |
| 41558 | glibenclamide tablets 5mg [teva]                                                        | oad     |   |   |
| 41559 | glibenclamide tablets 5mg [hillcross]                                                   | oad     |   |   |
| 41593 | glibenclamide tablets 2.5mg [teva]                                                      | oad     |   |   |
| 41834 | insulin zinc suspension lente injection 100 iu/ml [celltech]                            | insulin |   |   |
| 41898 | glibenclamide                                                                           | oad     |   |   |
| 41959 | penject injection device 100 units/ml [hypoguard]                                       | insulin |   |   |
| 42161 | orabet tablets 500mg [sandoz]                                                           | oad     |   |   |
| 42395 | humalog mix 25 vial injection suspension 100 units/ml [lilly]                           | insulin |   |   |
| 42790 | gliclazide tablets 80mg [merck-gen]                                                     | oad     |   |   |
| 42954 | insulin biphasic isophane human vial injection suspension 25:75; 100 units/ml           | insulin |   |   |
| 43065 | gliclazide tablets 40mg                                                                 | oad     |   |   |
| 43270 | metformin sugar free oral solution 500mg/5ml [rosemont]                                 | oad     | 1 | 1 |
| 43465 | zicron tablets 40mg [bristol lb]                                                        | oad     |   |   |
| 43619 | sitagliptin with metformin tablets 50mg + 1000mg                                        | oad     | 1 | 1 |
| 43684 | janumet tablets 50mg + 1000mg [m s d]                                                   | oad     |   |   |
| 43950 | humulin i kwikpen injection suspension 100 units/ml [lilly]                             | insulin |   |   |
| 43953 | insulin biphasic lispro vial injection suspension 25:75; 100 units/ml                   | insulin |   |   |
| 43991 | humulin m3 kwikpen injection suspension 100 units/ml [lilly]                            | insulin |   |   |
| 44250 | metformin oral solution 500mg/5ml [hillcross]                                           | oad     | 1 | 1 |
| 44251 | insulin zinc suspension mixed porcine injection 100 units/ml                            | insulin |   |   |
| 44304 | glyconon tablets 500mg [ddsa]                                                           | oad     |   |   |
| 44378 | insulin biphasic isophane human disposable pen injection suspension 25:75; 100 units/ml | insulin |   |   |
| 44473 | edicil mr tablets 30mg [ratiopharm]                                                     | oad     |   |   |
| 44480 | insuman comb 25 solostar injection suspension 100 units/ml [aventis]                    | insulin |   |   |
| 44738 | niddaryl tablets 1mg [dee]                                                              | oad     |   |   |
| 45158 | insuman comb 15 cartridge injection suspension 100 units/ml [aventis]                   | insulin |   |   |

|       |                                                                                                 |         |   |   |
|-------|-------------------------------------------------------------------------------------------------|---------|---|---|
| 45215 | gliclazide tablets 80mg [neolab]                                                                | oad     |   |   |
| 45581 | metabet sr tablets 500mg [morningsid]                                                           | oad     | 1 | 1 |
| 45775 | saxagliptin tablets 2.5mg                                                                       | oad     |   |   |
| 45821 | onglyza tablets 2.5mg [bms]                                                                     | oad     |   |   |
| 45831 | dacadis modified release tablet 30mg [gen (uk)]                                                 | oad     |   |   |
| 46001 | insuman basal solostar injection suspension 100 units/ml [aventis]                              | insulin |   |   |
| 46458 | exenatide powder for prolonged release injection suspension 2mg                                 | oad     |   |   |
| 46469 | bydureon powder for prolonged release injection suspension 2mg [lilly]                          | oad     |   |   |
| 46665 | linagliptin tablets 5mg                                                                         | oad     |   |   |
| 46666 | novorapid flextouch injection solution 100 units/ml [novo]                                      | insulin |   |   |
| 46716 | trajenta tablets 5mg [boeh ingl]                                                                | oad     |   |   |
| 46927 | tolbutamide tablets 500mg [teva]                                                                | oad     |   |   |
| 46989 | metabet sr tablets 1000mg [morningsid]                                                          | oad     | 1 | 1 |
| 47074 | gliclazide oral suspension 80mg/5ml                                                             | oad     |   |   |
| 47360 | neutral insulin injection 100 units/ml [celltech]                                               | insulin |   |   |
| 47856 | Neuphane 100unit/ml Injection (Wellcome Medical Division)                                       | insulin |   |   |
| 47894 | Nazdol MR 30mg tablets (Consilient Health Ltd)                                                  | oad     |   |   |
| 47939 | Glucient SR 500mg tablets (Consilient Health Ltd)                                               | oad     | 1 | 1 |
| 48056 | Gliclazide 80mg tablets (Sovereign Medical Ltd)                                                 | oad     |   |   |
| 48120 | Avandia 2mg Tablet (GlaxoSmithKline UK Ltd)                                                     | oad     |   |   |
| 48139 | Pioglitazone 30mg tablets (A A H Pharmaceuticals Ltd)                                           | oad     |   |   |
| 48149 | Metformin 500mg tablets (Almus Pharmaceuticals Ltd)                                             | oad     | 1 | 1 |
| 48401 | Sitagliptin 50mg tablets                                                                        | oad     |   |   |
| 48533 | Sitagliptin 25mg tablets                                                                        | oad     |   |   |
| 49108 | NovoRapid Penfill 100units/ml solution for injection 3ml cartridges (Necessity Supplies Ltd)    | insulin |   |   |
| 49502 | Glucophage SR 500mg tablets (Mawdsley-Brooks & Company Ltd)                                     | oad     | 1 | 1 |
| 49738 | Metformin 1g modified-release tablets (A A H Pharmaceuticals Ltd)                               | oad     | 1 | 1 |
| 49831 | Lantus 100units/ml solution for injection 3ml pre-filled SoloStar pen (Necessity Supplies Ltd)  | insulin |   |   |
| 50087 | Januvia 50mg tablets (Merck Sharp & Dohme Ltd)                                                  | oad     |   |   |
| 50124 | Januvia 25mg tablets (Merck Sharp & Dohme Ltd)                                                  | oad     |   |   |
| 50570 | Glucophage SR 500mg tablets (Lexon (UK) Ltd)                                                    | oad     | 1 | 1 |
| 50633 | Lantus 100units/ml solution for injection 3ml cartridges (Necessity Supplies Ltd)               | insulin |   |   |
| 50682 | Jentaduetto 2.5mg/1000mg tablets (Boehringer Ingelheim Ltd)                                     | oad     |   |   |
| 50821 | Metformin 850mg tablets (Pfizer Ltd)                                                            | oad     | 1 | 1 |
| 50970 | Metformin 500mg tablets (Bristol Laboratories Ltd)                                              | oad     | 1 | 1 |
| 51080 | Metabet SR 1000mg tablets (Actavis UK Ltd)                                                      | oad     | 1 | 1 |
| 51135 | Metformin 500mg modified-release tablets (A A H Pharmaceuticals Ltd)                            | oad     | 1 | 1 |
| 51527 | Metformin 500mg tablets (Boston Healthcare Ltd)                                                 | oad     | 1 | 1 |
| 51743 | NovoRapid Penfill 100units/ml solution for injection 3ml cartridges (Sigma Pharmaceuticals Plc) | insulin |   |   |

|       |                                                                                                         |         |   |   |
|-------|---------------------------------------------------------------------------------------------------------|---------|---|---|
| 51955 | Gliclazide 80mg tablets (Accord Healthcare Ltd)                                                         | oad     |   |   |
| 52203 | Enyglid 0.5mg tablets (Consilient Health Ltd)                                                           | oad     |   |   |
| 52221 | Diagemet XL 500mg tablets (Genus Pharmaceuticals Ltd)                                                   | oad     |   |   |
| 52442 | Metformin 500mg tablets (Pfizer Ltd)                                                                    | oad     | 1 | 1 |
| 52445 | Linagliptin 2.5mg / Metformin 1g tablets                                                                | oad     |   |   |
| 52449 | Linagliptin 2.5mg / Metformin 850mg tablets                                                             | oad     |   |   |
| 52522 | Humalog Mix50 KwikPen 100units/ml suspension for injection 3ml pre-filled pen (DE Pharmaceuticals)      | insulin |   |   |
| 52634 | Glucophage SR 500mg tablets (DE Pharmaceuticals)                                                        | oad     | 1 | 1 |
| 52748 | Insulatard Penfill 100units/ml suspension for injection 3ml cartridges (Waymade Healthcare Plc)         | insulin |   |   |
| 53118 | NovoRapid FlexPen 100units/ml solution for injection 3ml pre-filled pen (Mawdsley-Brooks & Company Ltd) | insulin |   |   |
| 53251 | NovoRapid Penfill 100units/ml solution for injection 3ml cartridges (DE Pharmaceuticals)                | insulin |   |   |
| 53288 | Gliclazide 30mg modified-release tablets (A A H Pharmaceuticals Ltd)                                    | oad     |   |   |
| 53478 | Metformin 500mg modified-release tablets (Kent Pharmaceuticals Ltd)                                     | oad     | 1 | 1 |
| 53710 | Insulin human 500units/ml solution for injection 20ml vials                                             | insulin |   |   |
| 53774 | Metabet SR 500mg tablets (Actavis UK Ltd)                                                               | oad     | 1 | 1 |
| 53867 | Metformin 500mg tablets (Zentiva)                                                                       | oad     | 1 | 1 |
| 54150 | Jentaduetto 2.5mg/850mg tablets (Boehringer Ingelheim Ltd)                                              | oad     |   |   |
| 54182 | Dapagliflozin 10mg tablets                                                                              | oad     |   |   |
| 54203 | Forxiga 10mg tablets (AstraZeneca UK Ltd)                                                               | oad     |   |   |
| 54265 | Dapagliflozin 5mg tablets                                                                               | oad     |   |   |
| 54442 | Metformin (roi) 1000mg Tablet                                                                           | oad     | 1 | 1 |
| 54462 | Insulin biphasic isophane human emp 25:75; 100 units/ml Injection                                       | insulin |   |   |
| 54480 | Forxiga 5mg tablets (AstraZeneca UK Ltd)                                                                | oad     |   |   |
| 54764 | Gliclazide 80mg tablets (Arrow Generics Ltd)                                                            | oad     |   |   |
| 54891 | Saxagliptin 2.5mg / Metformin 1g tablets                                                                | oad     | 1 |   |
| 54898 | Metformin 850mg tablets (Almus Pharmaceuticals Ltd)                                                     | oad     | 1 | 1 |
| 54973 | Saxagliptin 2.5mg / Metformin 850mg tablets                                                             | oad     |   |   |
| 55234 | Tresiba FlexTouch 200units/ml solution for injection 3ml pre-filled pen (Novo Nordisk Ltd)              | insulin |   |   |
| 55270 | Duformin 500mg Tablet (Dumex Ltd)                                                                       | oad     |   |   |
| 55413 | Lixisenatide 20micrograms/0.2ml solution for injection 3ml pre-filled disposable devices                | oad     |   |   |
| 55459 | Lixisenatide 10micrograms/0.2ml solution for injection 3ml pre-filled disposable devices                | oad     |   |   |
| 55462 | Tresiba FlexTouch 100units/ml solution for injection 3ml pre-filled pen (Novo Nordisk Ltd)              | insulin |   |   |
| 55517 | Insulin isophane human 100units/ml suspension for injection 10ml vials                                  | insulin |   |   |
| 55603 | Humalog KwikPen 100units/ml solution for injection 3ml pre-filled pen (DE Pharmaceuticals)              | insulin |   |   |
| 55618 | Levemir FlexPen 100units/ml solution for injection 3ml pre-filled pen (Waymade Healthcare Plc)          | insulin |   |   |

|       |                                                                                                                                                                                       |         |   |   |
|-------|---------------------------------------------------------------------------------------------------------------------------------------------------------------------------------------|---------|---|---|
| 55687 | Insulin degludec 100units/ml solution for injection 3ml pre-filled disposable devices                                                                                                 | insulin |   |   |
| 55711 | Metformin 500mg tablets (Alliance Healthcare (Distribution) Ltd)                                                                                                                      | oad     | 1 | 1 |
| 55723 | Lixisenatide 10micrograms/0.2ml solution for injection 3ml pre-filled disposable devices and Lixisenatide 20micrograms/0.2ml solution for injection 3ml pre-filled disposable devices | oad     |   |   |
| 55728 | Lyxumia 10micrograms/0.2ml solution for injection 3ml pre-filled pen (Sanofi)                                                                                                         | oad     |   |   |
| 55729 | Lyxumia 20micrograms/0.2ml solution for injection 3ml pre-filled pen (Sanofi)                                                                                                         | oad     |   |   |
| 55739 | Metformin 500mg tablets (Tillomed Laboratories Ltd)                                                                                                                                   | oad     | 1 | 1 |
| 55767 | Lyxumia 10micrograms/0.2ml solution for injection 3ml pre-filled pen and Lyxumia 20micrograms/0.2ml solution for injection 3ml pre-filled pen (Sanofi)                                | oad     |   |   |
| 55862 | Gliclazide Oral solution                                                                                                                                                              | oad     |   |   |
| 55907 | Insulin degludec 100units/ml solution for injection 3ml cartridges                                                                                                                    | insulin |   |   |
| 55910 | Tresiba Penfill 100units/ml solution for injection 3ml cartridges (Novo Nordisk Ltd)                                                                                                  | insulin |   |   |
| 56008 | Gliclazide 80mg tablets (Almus Pharmaceuticals Ltd)                                                                                                                                   | oad     |   |   |
| 56208 | Pioglitazone 15mg tablets (A A H Pharmaceuticals Ltd)                                                                                                                                 | oad     |   |   |
| 56376 | Rosiglitazone 4mg with glimepiride 4mg tablet                                                                                                                                         | oad     |   |   |
| 56437 | Gliclazide 60mg modified-release tablets                                                                                                                                              | oad     |   |   |
| 56489 | NovoMix 30 Penfill 100units/ml suspension for injection 3ml cartridges (Waymade Healthcare Plc)                                                                                       | insulin |   |   |
| 56495 | Lantus 100units/ml solution for injection 3ml pre-filled OptiSet pen (Waymade Healthcare Plc)                                                                                         | insulin |   |   |
| 56691 | Insulin degludec 200units/ml solution for injection 3ml pre-filled disposable devices                                                                                                 | insulin |   |   |
| 56831 | Troglitazone 200mg Tablet                                                                                                                                                             | oad     |   |   |
| 56857 | Insulin isophane biphasic human 15/85 100units/ml suspension for injection 3ml cartridges                                                                                             | insulin |   |   |
| 56965 | Komboglyze 2.5mg/1000mg tablets (AstraZeneca UK Ltd)                                                                                                                                  | oad     |   |   |
| 57147 | Bolamyn SR 1000mg tablets (Teva UK Ltd)                                                                                                                                               | oad     | 1 | 1 |
| 57457 | Metformin 500mg tablets (Aurobindo Pharma Ltd)                                                                                                                                        | oad     | 1 | 1 |
| 57529 | Humalog 100units/ml solution for injection 10ml vials (Dowelhurst Ltd)                                                                                                                | insulin |   |   |
| 57564 | Humalog KwikPen 100units/ml solution for injection 3ml pre-filled pen (Waymade Healthcare Plc)                                                                                        | insulin |   |   |
| 57601 | Daonil 5mg tablets (Dowelhurst Ltd)                                                                                                                                                   | oad     |   |   |
| 57622 | Humalog Mix50 KwikPen 100units/ml suspension for injection 3ml pre-filled pen (Waymade Healthcare Plc)                                                                                | insulin |   |   |
| 57659 | Pioglitazone 30mg tablets (Actavis UK Ltd)                                                                                                                                            | oad     |   |   |
| 57830 | Gliclazide 30mg modified-release tablets (Alliance Healthcare (Distribution) Ltd)                                                                                                     | oad     |   |   |
| 58051 | Metformin 500mg/5ml oral solution                                                                                                                                                     | oad     | 1 | 1 |
| 58607 | Metformin 500mg/5ml oral solution sugar free (Zentiva)                                                                                                                                | oad     | 1 | 1 |
| 58865 | Komboglyze 2.5mg/850mg tablets (AstraZeneca UK Ltd)                                                                                                                                   | oad     |   |   |
| 58882 | Gliclazide 120mg/5ml oral suspension                                                                                                                                                  | oad     |   |   |
| 59177 | Alogliptin 25mg tablets                                                                                                                                                               | oad     |   |   |

|       |                                                                                                     |         |   |   |
|-------|-----------------------------------------------------------------------------------------------------|---------|---|---|
| 59385 | Vipdomet 12.5mg/1000mg tablets (Takeda UK Ltd)                                                      | oad     |   |   |
| 59500 | Insulin isophane human 100units/ml suspension for injection 5ml vials                               | insulin |   |   |
| 59533 | NovoRapid FlexPen 100units/ml solution for injection 3ml pre-filled pen (Sigma Pharmaceuticals Plc) | insulin |   |   |
| 59620 | Glucophage SR 500mg tablets (Waymade Healthcare Plc)                                                | oad     | 1 | 1 |
| 59809 | Alogliptin 6.25mg tablets                                                                           | oad     |   |   |
| 60012 | Dapagliflozin 5mg / Metformin 1g tablets                                                            | oad     | 1 |   |
| 60073 | Canagliflozin 100mg tablets                                                                         | oad     |   |   |
| 60074 | Metformin 1g modified-release tablets (Waymade Healthcare Plc)                                      | oad     | 1 | 1 |
| 60211 | Canagliflozin 100mg tablets                                                                         | oad     |   |   |
| 60286 | Metformin 500mg/5ml oral suspension                                                                 | oad     | 1 | 1 |
| 60328 | Alogliptin 12.5mg tablets                                                                           | oad     |   |   |
| 60379 | Invokana 300mg tablets (Janssen-Cilag Ltd)                                                          | oad     |   |   |
| 60386 | Canagliflozin 300mg tablets                                                                         | oad     |   |   |
| 60430 | Invokana 100mg tablets (Janssen-Cilag Ltd)                                                          | oad     |   |   |
| 60495 | Gliclazide 80mg tablets (Teva UK Ltd)                                                               | oad     |   |   |
| 60497 | Alogliptin 12.5mg / Metformin 1g tablets                                                            | oad     |   |   |
| 60643 | Xigduo 5mg/1000mg tablets (AstraZeneca UK Ltd)                                                      | oad     |   |   |
| 60681 | Vipidia 12.5mg tablets (Takeda UK Ltd)                                                              | oad     |   |   |
| 60682 | Vipidia 25mg tablets (Takeda UK Ltd)                                                                | oad     |   |   |
| 60933 | Humulin M3 100units/ml suspension for injection 10ml vials (Sigma Pharmaceuticals Plc)              | insulin |   |   |
| 60951 | Insulin human 100units/ml solution for injection 10ml vials                                         | insulin |   |   |
| 60968 | Metformin 500mg modified-release tablets (Actavis UK Ltd)                                           | oad     | 1 | 1 |
| 61043 | Sukkarto SR 1000mg tablets (Morningside Healthcare Ltd)                                             | oad     | 1 | 1 |
| 61311 | Glimepiride 4mg tablets (Sigma Pharmaceuticals Plc)                                                 | oad     |   |   |
| 61559 | Sukkarto SR 500mg tablets (Morningside Healthcare Ltd)                                              | oad     | 1 | 1 |
| 61756 | Empagliflozin 10mg tablets                                                                          | oad     |   |   |
| 61845 | NovoRapid PumpCart 100units/ml solution for injection 1.6ml cartridges (Novo Nordisk Ltd)           | insulin |   |   |
| 61925 | NovoNorm 500microgram tablets (Waymade Healthcare Plc)                                              | oad     |   |   |
| 61957 | Gliclazide 40mg tablets (A A H Pharmaceuticals Ltd)                                                 | oad     |   |   |
| 62014 | Glimepiride 2mg tablets (Accord Healthcare Ltd)                                                     | oad     |   |   |
| 62034 | Laaglyda MR 60mg tablets (Consilient Health Ltd)                                                    | oad     |   |   |
| 62144 | Metformin 500mg modified-release tablets (DE Pharmaceuticals)                                       | oad     | 1 | 1 |
| 62172 | Empagliflozin 25mg tablets                                                                          | oad     |   |   |
| 62180 | Insulin aspart 100units/ml solution for injection 1.6ml cartridges                                  | insulin |   |   |
| 62265 | Metformin 500mg modified-release tablets (Mawdsley-Brooks & Company Ltd)                            | oad     | 1 | 1 |
| 62276 | Humulin R 500units/ml solution for injection 20ml vials (Imported (United States))                  | insulin |   |   |
| 62326 | Vipidia 6.25mg tablets (Takeda UK Ltd)                                                              | oad     |   |   |
| 62426 | Pioglitazone 30mg tablets (Accord Healthcare Ltd)                                                   | oad     |   |   |
| 62605 | Metformin 850mg tablets (Kent Pharmaceuticals Ltd)                                                  | oad     | 1 | 1 |



|       |                                                                                                              |         |   |   |
|-------|--------------------------------------------------------------------------------------------------------------|---------|---|---|
| 62661 | Bydureon 2mg powder and solvent for suspension for injection pre-filled pen (AstraZeneca UK Ltd)             | oad     |   |   |
| 62760 | Jardiance 10mg tablets (Boehringer Ingelheim Ltd)                                                            | oad     |   |   |
| 62824 | Metformin 1g modified-release tablets (Actavis UK Ltd)                                                       | oad     | 1 | 1 |
| 62899 | Xultophy 100units/ml / 3.6mg/ml solution for injection 3ml pre-filled pen (Novo Nordisk Ltd)                 | insulin |   |   |
| 62904 | Exenatide 2mg powder and solvent for suspension for injection pre-filled disposable devices                  | oad     |   |   |
| 63031 | Dapagliflozin 5mg / Metformin 850mg tablets                                                                  | oad     |   |   |
| 63045 | Metformin 850mg tablets (Relonchem Ltd)                                                                      | oad     | 1 | 1 |
| 63046 | Pioglitazone 45mg tablets (A A H Pharmaceuticals Ltd)                                                        | oad     |   |   |
| 63048 | Gliclazide 80mg tablets (Alliance Healthcare (Distribution) Ltd)                                             | oad     |   |   |
| 63107 | Pioglitazone 45mg tablets (Waymade Healthcare Plc)                                                           | oad     |   |   |
| 63131 | Ziclag 30mg modified-release tablets (Lupin (Europe) Ltd)                                                    | insulin |   |   |
| 63307 | Metformin 1g/5ml oral solution                                                                               | oad     | 1 | 1 |
| 63336 | Trulicity 1.5mg/0.5ml solution for injection pre-filled pen (Eli Lilly and Company Ltd)                      | oad     |   |   |
| 63401 | Trulicity 0.75mg/0.5ml solution for injection pre-filled pen (Eli Lilly and Company Ltd)                     | oad     |   |   |
| 63421 | Pioglitazone 30mg tablets (Teva UK Ltd)                                                                      | oad     |   |   |
| 63464 | Humalog KwikPen 200units/ml solution for injection 3ml pre-filled pen (Eli Lilly and Company Ltd)            | insulin |   |   |
| 63516 | Forxiga 10mg tablets (Waymade Healthcare Plc)                                                                | oad     |   |   |
| 63562 | Insulin degludec 100units/ml / Liraglutide 3.6mg/ml solution for injection 3ml pre-filled disposable devices | insulin |   |   |
| 63679 | Hypurin soluble 100iu/ml Injection (C P Pharmaceuticals Ltd)                                                 | insulin |   |   |
| 63785 | Dulaglutide 0.75mg/0.5ml solution for injection pre-filled disposable devices                                | oad     |   |   |
| 63823 | Dulaglutide 1.5mg/0.5ml solution for injection pre-filled disposable devices                                 | oad     |   |   |

## Human immunodeficiency virus infection

| Medcode | Readterm                                                      |
|---------|---------------------------------------------------------------|
| 2835    | HIV positive                                                  |
| 8281    | HIV disease resulting in wasting syndrome                     |
| 9130    | Human immunodeficiency virus infection                        |
| 23763   | AIDS carrier                                                  |
| 23770   | Acquired immune deficiency syndrome                           |
| 23951   | HIV disease resulting in candidiasis                          |
| 24872   | [V]Asymptomatic human immunodeficiency virus infection status |
| 27641   | HIV disease resulting in Pneumocystis carinii pneumonia       |
| 27853   | HIV disease resulting in Kaposi's sarcoma                     |
| 33943   | Notification of AIDS                                          |
| 36294   | Acquired human immunodeficiency virus infection syndrome NOS  |
| 37006   | HIV disease resulting in mycobacterial infection              |
| 41185   | [X]Dementia in human immunodef virus [HIV] disease            |
| 44288   | [D]Laboratory evidence of human immunodeficiency virus [HIV]  |
| 44303   | Human immunodef virus resulting in other disease              |
| 44617   | HIV disease resulting in Burkitt's lymphoma                   |
| 47632   | HIV disease result/haematological+immunologic abnorms,NEC     |
| 50076   | HIV disease resulting in multiple infections                  |
| 51708   | HIV dis reslt/oth mal neopl/lymph,h'matopoetc+reltd tissu     |
| 53636   | Human immunodeficiency virus with neurological disease        |
| 58857   | Acute human immunodeficiency virus infection                  |
| 58859   | Asymptomatic human immunodeficiency virus infection           |
| 62854   | [X]Human immunodeficiency virus disease                       |
| 62891   | Human immunodeficiency virus with other clinical findings     |
| 65117   | HIV disease resulting in lymphoid interstitial pneumonitis    |
| 66367   | HIV dis resulting oth types of non-Hodgkin's lymphoma         |
| 66368   | HIV disease resulting in cytomegaloviral disease              |
| 67575   | HIV disease resulting in unspecified malignant neoplasm       |
| 69766   | HIV infection with persistent generalised lymphadenopathy     |
| 69767   | [X]HIV disease resulting in other non-Hodgkin's lymphoma      |
| 70528   | Human immunodeficiency virus with secondary infection         |
| 70869   | Human immunodeficiency virus with constitutional disease      |
| 71450   | HIV disease resulting/unspcf infectious+parasitic disease     |
| 96751   | [X]HIV disease result/haematological+immunologic abnorms,NEC  |
| 100769  | [X]Unspecified human immunodeficiency virus [HIV] disease     |
| 101836  | Human immunodeficiency virus with secondary cancers           |
| 102117  | [X]HIV disease resulting in multiple infections               |
| 102252  | [X]HIV disease resulting in other specified conditions        |
| 104134  | [X]HIV disease resulting/other infectious+parasitic diseases  |
| 104466  | HIV disease complicating pregnancy childbirth puerperium      |

|        |                                                              |
|--------|--------------------------------------------------------------|
| 104717 | HIV disease resulting in Pneumocystis jirovecii pneumonia    |
| 105040 | HIV pos gen health check serv declind - enhanc service admin |
| 105324 | HIV disease resulting in multiple malignant neoplasms        |
| 107807 | [X]HIV disease resulting in other viral infections           |
| 108054 | HIV disease resulting in Kaposi sarcoma                      |
| 27519  | Pneumonia with pneumocystis carinii                          |
| 101191 | Human immunodeficiency virus annual review                   |
| 540    | HTLV-3 antibody positive                                     |
| 43537  | HIV 1 nucleic acid detection                                 |

| icd   | icd_description                                             |
|-------|-------------------------------------------------------------|
| B20   | Human immunodef virus dis result infectious parasitic dis   |
| B20.0 | HIV disease resulting in mycobacterial infection            |
| B20.1 | HIV disease resulting in other bacterial infections         |
| B20.2 | HIV disease resulting in cytomegaloviral disease            |
| B20.3 | HIV disease resulting in other viral infections             |
| B20.4 | HIV disease resulting in candidiasis                        |
| B20.5 | HIV disease resulting in other mycoses                      |
| B20.6 | HIV disease resulting in Pneumocystis carinii pneumonia     |
| B20.7 | HIV disease resulting in multiple infections                |
| B20.8 | HIV dis resulting in oth infectious and parasitic dis       |
| B20.9 | HIV disease resulting in unspec infectious or parasitic dis |
| B21   | Human immunodef virus dis resulting malignant neopl         |
| B21.0 | HIV disease resulting in Kaposi's sarcoma                   |
| B21.1 | HIV disease resulting in Burkitt's lymphoma                 |
| B21.2 | HIV dis resulting oth types of non-Hodgkin's lymphoma       |
| B21.3 | HIV dis result oth mal neo lymphoid haematopoietic rel tis  |
| B21.7 | HIV disease resulting in multiple malignant neoplasms       |
| B21.8 | HIV disease resulting in other malignant neoplasms          |
| B21.9 | HIV disease resulting in unspecified malignant neoplasm     |
| B22   | Human immunodef virus dis resulting in other spec dis       |
| B22.0 | HIV disease resulting in encephalopathy                     |
| B22.1 | HIV disease resulting in lymphoid interstitial pneumonitis  |
| B22.2 | HIV disease resulting in wasting syndrome                   |
| B22.7 | HIV dis resulting in multiple diseases classif elsewhere    |
| B23   | Human immunodef virus dis resulting in other conditions     |
| B23.0 | Acute HIV infection syndrome                                |
| B23.1 | HIV dis result (persistent) generalized lymphadenopathy     |
| B23.2 | HIV dis result haematologic / immunologic abnorm NEC        |
| B23.8 | HIV disease resulting in other specified conditions         |
| B24   | Unspecified human immunodeficiency virus [HIV] disease      |

|       |                                                              |
|-------|--------------------------------------------------------------|
| F02.4 | Dementia in human immunodeficient virus [HIV] disease        |
| Z21   | Asymptomatic human immunodeficient virus [HIV] infect status |

## Lymphoma

| Medcode | Readterm                                                     |
|---------|--------------------------------------------------------------|
| 1481    | Reticulosarcoma                                              |
| 1483    | [M]Lymphoma NOS                                              |
| 2462    | Hodgkin's disease                                            |
| 3371    | [M]Non Hodgkins lymphoma                                     |
| 3604    | Non - Hodgkin's lymphoma                                     |
| 3845    | Eosinophilic granuloma                                       |
| 4870    | Histiocytosis X (acute, progressive)                         |
| 5179    | Nodular lymphoma (Brill - Symmers disease)                   |
| 5572    | Myelofibrosis                                                |
| 7940    | [X]Non-Hodgkin's lymphoma NOS                                |
| 8649    | [X]Non-Hodgkin's lymphoma, unspecified type                  |
| 9172    | [M]Waldenstrom's macroglobulinaemia                          |
| 10411   | Waldenstrom's macroglobulinaemia                             |
| 12006   | Mycosis fungoides                                            |
| 12323   | Malignant neoplasm of lymphatic and haemopoietic tissue      |
| 12335   | Malignant lymphoma NOS                                       |
| 12464   | Peripheral T-cell lymphoma                                   |
| 15027   | Malignant lymphoma NOS                                       |
| 15036   | Malignant mast cell tumours                                  |
| 15504   | Malignant lymphoma NOS of lymph nodes of multiple sites      |
| 16460   | [M]Malignant lymphoma, non Hodgkin's type                    |
| 16527   | Macroglobulinaemia                                           |
| 16774   | [M] Cutaneous lymphoma                                       |
| 17178   | [M]Lymphomas, NOS or diffuse                                 |
| 17182   | Follicular lymphoma NOS                                      |
| 17460   | Diffuse non-Hodgkin's lymphoblastic (diffuse) lymphoma       |
| 17887   | Malignant lymphoma otherwise specified                       |
| 18383   | [M] Large cell lymphoma                                      |
| 19140   | Hodgkin's nodular sclerosis of lymph nodes of multiple sites |
| 20437   | [M]Lymphomas, nodular or follicular                          |
| 20710   | [M]Hodgkin's disease                                         |
| 21402   | Burkitt's lymphoma                                           |
| 21463   | [M]Lymphocytic lymphoma NOS                                  |
| 21549   | Follicular non-Hodgkin's lymphoma                            |
| 23711   | [M]Malignant lymphoma, diffuse NOS                           |
| 26111   | Lymphomatoid papulosis                                       |
| 26135   | [M] Alpha heavy chain disease                                |
| 27416   | Lymphosarcoma                                                |
| 27562   | [M]Follicular lymphosarcoma NOS                              |
| 27965   | [M]AngiocentricT-cell lymphoma                               |

|       |                                                             |
|-------|-------------------------------------------------------------|
| 28639 | Follicular non-Hodgkin's small cleaved cell lymphoma        |
| 29178 | Hodgkin's disease, nodular sclerosis                        |
| 29876 | Hodgkin's, lymphocytic-histiocytic predominance NOS         |
| 30646 | Malignant neoplasm lymphatic or haematopoietic tissue OS    |
| 31324 | Mast cell malignancy of lymph nodes of multiple sites       |
| 31492 | [M] Monocytoid B-cell lymphoma                              |
| 31537 | [M]Hodgkin,s disease, lymphocytic predominance, nodular     |
| 31576 | Other types of follicular non-Hodgkin's lymphoma            |
| 31726 | [M]Malignant lymphoma, small cleaved cell, diffuse          |
| 31741 | [M]Hodgkin,s disease, nodular sclerosis, lymphocytic deplet |
| 31749 | [M]Monocytoid B-cell lymphoma                               |
| 31794 | Unspecified B-cell non-Hodgkin's lymphoma                   |
| 32240 | Lymphoma stage III                                          |
| 33333 | Other malignant neoplasm of lymphoid and histiocytic tissue |
| 33869 | [M]Malignant lymphoma, large cell, diffuse NOS              |
| 34089 | Malignant lymphoma NOS of lymph nodes of axilla and arm     |
| 34352 | [M]Lymphoblastic lymphoma NOS                               |
| 34926 | Letterer-Siwe disease                                       |
| 35014 | Sezary's disease                                            |
| 36114 | [M]Malignant lymphoma NOS                                   |
| 36736 | Histiocytosis X , unspecified                               |
| 37112 | Malignant neoplasm of histiocytic tissue                    |
| 38005 | Mycosis fungoides NOS                                       |
| 38939 | Hodgkin's disease, lymphocytic-histiocytic predominance     |
| 39798 | Diffuse non-Hodgkin's lymphoma, unspecified                 |
| 39883 | [M]Malig lymph, follicular centre cell, cleaved, follicular |
| 39906 | [M]Malignant lymphoma, centrocytic                          |
| 40000 | Langerhans' cell histiocytosis                              |
| 40508 | [M]Hodgkin,s disease, nodular sclerosis, lymphocytic predom |
| 40513 | [M]Lymphoma, nodular or follicular NOS                      |
| 40740 | [X]Malignant neoplasms of lymphoid, haematopoietic and rela |
| 40766 | [M] Peripheral T-cell lymphoma NOS                          |
| 40991 | Lymphoma staging system                                     |
| 41369 | Lymphosarcoma and reticulosarcoma                           |
| 41754 | [M]Malignant lymphoma, lymphoplasmacytoid type              |
| 41841 | [M]Malignant lymphoma, follicular centre cell NOS           |
| 42198 | [M]Hodgkin's disease, nodular sclerosis NOS                 |
| 42461 | Hodgkin's disease NOS                                       |
| 42579 | Malignant lymphoma NOS of intra-abdominal lymph nodes       |
| 42769 | [M]Hodgkin's disease NOS                                    |
| 43415 | [X]Other Hodgkin's disease                                  |
| 44196 | Hodgkin's granuloma                                         |
| 44267 | Malignant histiocytosis                                     |

|       |                                                              |
|-------|--------------------------------------------------------------|
| 44318 | Oth and unspecif peripheral & cutaneous T-cell lymphomas     |
| 44617 | HIV disease resulting in Burkitt's lymphoma                  |
| 45264 | Nodular lymphoma of lymph nodes of head, face and neck       |
| 45768 | [M]Acute progressive histiocytosis X                         |
| 46877 | [M]Malignant lymphoma, small lymphocytic NOS                 |
| 46931 | [M]Malignant lymphoma, stem cell type                        |
| 46967 | [M]Mycosis fungoides                                         |
| 47204 | Letterer-Siwe disease NOS                                    |
| 47330 | [M]HISTIOCYTIC MEDULLARY RETICULOSIS                         |
| 48253 | [M]Malignant lymphoma, immunoblastic type                    |
| 49253 | [M]Giant follicular lymphoma                                 |
| 49262 | Follicular non-Hodgkin's large cell lymphoma                 |
| 49301 | Malignant neoplasm lymphatic or haematopoietic tissue NOS    |
| 49605 | Hodgkin's disease, mixed cellularity                         |
| 49825 | [M]Reticulum cell sarcoma NOS                                |
| 50668 | Diffuse non-Hodgkin's small cell (diffuse) lymphoma          |
| 50695 | Diffuse non-Hodgkin mixed sml & lge cell (diffuse) lymphoma  |
| 50696 | Malignant lymphoma NOS of lymph nodes of head, face and neck |
| 51285 | [M]Hodgkin's disease, mixed cellularity                      |
| 51680 | [M]Malignant lymphoma, small cell, noncleaved, diffuse       |
| 51718 | Histiocytosis X , chronic                                    |
| 51852 | [M]Malig lymphoma, lymphocytic, intermediate different NOS   |
| 51895 | [M]Lymphoma, diffuse or NOS                                  |
| 52591 | [M]LYMPHOBLASTOMA NOS                                        |
| 52593 | [M] Gamma heavy chain disease                                |
| 53397 | Hodgkin's disease NOS                                        |
| 53551 | Diffuse non-Hodgkin's immunoblastic (diffuse) lymphoma       |
| 54083 | Letterer-Siwe disease of lymph nodes of multiple sites       |
| 54190 | [M] Angioimmunoblastic lymphadenopathy                       |
| 54411 | Hand - Schuller - Christian disease                          |
| 55303 | Hodgkin's nodular sclerosis of head, face and neck           |
| 56041 | [M]Hodgkin's disease, lymphocytic predominance               |
| 57225 | Hodgkin's disease, nodular sclerosis of unspecified site     |
| 57427 | Malignant lymphoma NOS of unspecified site                   |
| 57509 | Waldenstrom's hypergammaglobulinaemic purpura                |
| 57544 | [M]True histiocytic lymphoma                                 |
| 57737 | Lymphoepithelioid lymphoma                                   |
| 58015 | [M]Malignant lymphomatous polyposis                          |
| 58082 | Nodular lymphoma of lymph nodes of multiple sites            |
| 58684 | Hodgkin's mixed cellularity of intrathoracic lymph nodes     |
| 58871 | Malignant histiocytosis NOS                                  |
| 58953 | [M]Malig lymph,follicular centre cell,noncleaved,follicular  |
| 58962 | Malignant immunoproliferative small intestinal disease       |

|       |                                                               |
|-------|---------------------------------------------------------------|
| 59115 | Burkitt's lymphoma of lymph nodes of head, face and neck      |
| 59593 | [M]Letterer - Siwe disease                                    |
| 59755 | Hodgkin's disease NOS of intrathoracic lymph nodes            |
| 59778 | Hodgkin's disease NOS of lymph nodes of head, face and neck   |
| 60092 | Malignant lymphoma NOS of spleen                              |
| 60242 | Reticulosarcoma of unspecified site                           |
| 60275 | [M]Malignant lymphoma, centroblastic type NOS                 |
| 60504 | [M]Lymphocytic lymphosarcoma NOS                              |
| 60918 | Lymphoma stage I                                              |
| 61149 | Hodgkin's nodular sclerosis of intra-abdominal lymph nodes    |
| 61251 | [M]Malign lymphoma,lymphocytic,intermediate differrn, diffuse |
| 61662 | Hodgkin's disease NOS, unspecified site                       |
| 61997 | [M]Hodgkin's disease NOS                                      |
| 62380 | Lymphosarcoma of intrathoracic lymph nodes                    |
| 62437 | Malignant reticulosis                                         |
| 63054 | Hodgkin's disease, nodular sclerosis NOS                      |
| 63105 | Malignant lymphoma NOS of lymph node inguinal region and leg  |
| 63239 | [M]Malignant histiocytosis                                    |
| 63375 | [X]Unspecified B-cell non-Hodgkin's lymphoma                  |
| 63625 | Hodgkin's lymphocytic depletion lymph nodes axilla and arm    |
| 63699 | [M]Malignant lymphoma, nodular NOS                            |
| 63723 | Lymphosarcoma NOS                                             |
| 63973 | [M]Microglioma                                                |
| 63994 | [M]Malignant lymphoma, large cell, cleaved, diffuse           |
| 64036 | Hodgkin's sarcoma                                             |
| 64336 | [X]Other specified types of non-Hodgkin's lymphoma            |
| 64343 | [M]Hodgkin,s disease, nodular sclerosis, mixed cellularity    |
| 64427 | Unspec malig neop lymphoid/histiocytic lymph node head/neck   |
| 64515 | [X]Diffuse non-Hodgkin's lymphoma, unspecified                |
| 64670 | Lymphosarcoma of intra-abdominal lymph nodes                  |
| 64947 | [M]Brill - Symmers' disease                                   |
| 65180 | Diffuse non-Hodgkin's lymphoma undifferentiated (diffuse)     |
| 65434 | Malignant neoplasms of lymphoid and histiocytic tissue NOS    |
| 65483 | Hodgkin's nodular sclerosis of lymph nodes of axilla and arm  |
| 65489 | Hodgkin's paraganuloma                                        |
| 65584 | [M]Hodgkin,s disease, lymphocytic predominance, diffuse       |
| 65642 | Malignant histiocytosis of intra-abdominal lymph nodes        |
| 65701 | Nodular lymphoma NOS                                          |
| 66327 | Nodular lymphoma of unspecified site                          |
| 66367 | HIV dis resulting oth types of non-Hodgkin's lymphoma         |
| 66603 | [M]Malig lymphoma, follicular centre cell, non-cleaved NOS    |
| 67203 | [M]Lymphoblastic lymphosarcoma NOS                            |
| 67339 | [M]MALIGNANT MASTOCYTOSIS                                     |



|       |                                                              |
|-------|--------------------------------------------------------------|
| 67506 | Hodgkin's nodular sclerosis of intrathoracic lymph nodes     |
| 67518 | [X]Other types of follicular non-Hodgkin's lymphoma          |
| 67703 | Hodgkin's disease, lymphocytic depletion                     |
| 68039 | Hodgkin's sarcoma of lymph nodes of axilla and upper limb    |
| 68330 | Hodgkin's, lymphocytic-histiocytic pred of head, face, neck  |
| 68964 | [M]Malignant lymphoma, centroblastic-centrocytic, diffuse    |
| 69301 | [M]Malignant lymphoma, convoluted cell type NOS              |
| 69497 | Malignant histiocytosis of unspecified site                  |
| 69767 | [X]HIV disease resulting in other non-Hodgkin's lymphoma     |
| 69980 | [M]Malignant lymphoma, lymphocytic, well differentiated NOS  |
| 70374 | Reticulosarcoma of intra-abdominal lymph nodes               |
| 70509 | Diffuse non-Hodgkin's centroblastic lymphoma                 |
| 70716 | Immunoproliferative neoplasm                                 |
| 70740 | [M]Malignant reticulosis                                     |
| 70842 | Follicular non-Hodg mixed sml cleavd & lge cell lymphoma     |
| 71031 | Reticulosarcoma of lymph nodes of head, face and neck        |
| 71117 | [M]Malignant lymphoma, undifferentiated cell type NOS        |
| 71142 | Hodgkin's, lymphocytic-histiocytic predominance unspec site  |
| 71238 | Lymphosarcoma of lymph nodes of head, face and neck          |
| 71262 | Malignant lymphoma NOS of intrapelvic lymph nodes            |
| 71304 | Burkitt's lymphoma NOS                                       |
| 71609 | Unspec malig neop lymphoid/histiocytic nodes inguinal/leg    |
| 71619 | [M]Malignant lymphoma, large cell, noncleaved, diffuse       |
| 71625 | Lymphosarcoma of unspecified site                            |
| 71652 | [M]Malignant lymphoma, mixed small and large cell, diffuse   |
| 71672 | Lymphoma stage IV                                            |
| 71994 | Macroglobulinaemia NOS                                       |
| 72196 | [M]Malignant lymphoma, lymphocytic, poorly different NOS     |
| 72241 | [M]Prolymphocytic lymphosarcoma                              |
| 72433 | [M]Reticulosarcoma NOS                                       |
| 72500 | [X]Mal neoplasm/lymphoid,haematopoietic+related tissu,unspcf |
| 72714 | Mycosis fungoides of lymph nodes of inguinal region and leg  |
| 72725 | Malignant lymphoma NOS of intrathoracic lymph nodes          |
| 73532 | Hodgkin's, lymphocytic-histiocytic pred intra-abdominal node |
| 89230 | [M]Hodgkin's granuloma                                       |
| 89657 | Malignant mast cell tumour NOS                               |
| 90201 | T-zone lymphoma                                              |
| 91674 | Mycosis fungoides of intra-abdominal lymph nodes             |
| 91900 | Hodgkin's disease NOS of lymph nodes of axilla and arm       |
| 92068 | Nodular lymphoma of intra-abdominal lymph nodes              |
| 92245 | Hodgkin's, lymphocytic-histiocytic pred intrathoracic nodes  |
| 92380 | Burkitt's lymphoma of lymph nodes of inguinal region and leg |
| 93384 | Unspec malig neop lymphoid/histiocytic of intrathoracic node |

|        |                                                              |
|--------|--------------------------------------------------------------|
| 93951  | Hodgkin's, lymphocytic-histiocytic pred inguinal and leg     |
| 94005  | Hodgkin's disease, mixed cellularity NOS                     |
| 94239  | [M]Mast cell sarcoma                                         |
| 94279  | Hodgkin's disease NOS of spleen                              |
| 94407  | Hodgkin's mixed cellularity of lymph nodes head, face, neck  |
| 94415  | Malignant histiocytosis of lymph nodes head, face and neck   |
| 94935  | Lymphoma stage II                                            |
| 94995  | Nodular lymphoma of lymph nodes of inguinal region and leg   |
| 95012  | Mycosis fungoides of lymph nodes of multiple sites           |
| 95049  | Hodgkin's lymphocytic depletion of unspecified site          |
| 95058  | Reticulosarcoma of spleen                                    |
| 95338  | Hodgkin's, lymphocytic-histiocytic pred intrapelvic nodes    |
| 95464  | [M]Mycosis fungoides                                         |
| 95545  | Maltoma                                                      |
| 95630  | True histiocytic lymphoma                                    |
| 95715  | Mucosa-associated lymphoma                                   |
| 95792  | Lymphoid and histiocytic malignancy NOS                      |
| 95949  | Mycosis fungoides of unspecified site                        |
| 96183  | [M]Hodgkin's disease,lymphocytic depletion,diffuse fibrosis  |
| 96379  | Mycosis fungoides of lymph nodes of axilla and upper limb    |
| 97577  | Burkitt's lymphoma of intra-abdominal lymph nodes            |
| 97746  | Hodgkin's disease NOS of lymph nodes of multiple sites       |
| 97756  | [M]Sezary's disease                                          |
| 97852  | [M]Malignant lymphoma, centroblastic type, follicular        |
| 97863  | Hodgkin's disease, mixed cellularity of unspecified site     |
| 98596  | [X]Other types of diffuse non-Hodgkin's lymphoma             |
| 98840  | Hodgkin's paragranuloma of intra-abdominal lymph nodes       |
| 98909  | Hodgkin's granuloma of lymph nodes of head, face and neck    |
| 98961  | [M]Malignant lymphoma, centroblastic-centrocytic, follicular |
| 99012  | Hodgkin's disease NOS of lymph nodes inguinal region and leg |
| 99067  | Gamma heavy chain disease                                    |
| 99200  | [M]Hodgkin's disease, nodular sclerosis, cellular phase      |
| 99240  | Reticulosarcoma NOS                                          |
| 99655  | [M]Lymphosarcoma NOS                                         |
| 99695  | [M]Mycosis fungoides NOS                                     |
| 99887  | Other specified reticulosarcoma or lymphosarcoma             |
| 99951  | Reticulosarcoma or lymphosarcoma NOS                         |
| 100006 | Burkitt's lymphoma of intrathoracic lymph nodes              |
| 100352 | Lymphosarcoma of lymph nodes of inguinal region and leg      |
| 100423 | Hodgkin's paragranuloma of lymph nodes of head, face, neck   |
| 100532 | Sezary's disease NOS                                         |
| 100544 | [M]Reticulosarcoma, nodular                                  |
| 100615 | Mast cell malignancy of lymph nodes inguinal region and leg  |

|        |                                                              |
|--------|--------------------------------------------------------------|
| 101114 | Diffuse non-Hodgkin's large cell lymphoma                    |
| 101350 | Alpha heavy chain disease                                    |
| 101429 | [M]Lymphogranuloma, malignant                                |
| 101465 | Unspec malig neop lymphoid/histiocytic of multiple sites     |
| 101530 | Hodgkin's disease, lymphocytic depletion NOS                 |
| 101715 | Hodgkin's disease, lymphocytic depletion of spleen           |
| 102158 | Letterer-Siwe disease of intrathoracic lymph nodes           |
| 102594 | Diffuse large B-cell lymphoma                                |
| 102688 | [X]Other malignant immunoproliferative diseases              |
| 102715 | LETTERER-SIWE DISEASE OF UNSPECIFIED SITES                   |
| 103245 | Lymphosarcoma of spleen                                      |
| 103353 | Unspec malig neop lymphoid/histiocytic intra-abdominal nodes |
| 103900 | Mast cell malignancy of unspecified site                     |
| 104152 | Follicular lymphoma                                          |
| 104291 | Hodgkin lymphoma                                             |
| 104386 | Small cell B-cell lymphoma                                   |
| 104391 | Non-Hodgkin lymphoma                                         |
| 104412 | Lymphoblastic (diffuse) lymphoma                             |
| 104484 | Other classical Hodgkin lymphoma                             |
| 104620 | Mantle cell lymphoma                                         |
| 104743 | Hodgkin's, lymphocytic-histiocytic pred of multiple sites    |
| 104790 | Lymphosarcoma of lymph nodes of multiple sites               |
| 104862 | Cutaneous T-cell lymphoma                                    |
| 104895 | Nodular lymphocyte predominant Hodgkin lymphoma              |
| 104934 | Other mature T/NK-cell lymphoma                              |
| 105020 | Follicular lymphoma grade 3a                                 |
| 105025 | [X]OTH SPCF MAL NEOPLSM/LYMPHOID,HAEMATOPOIETIC+RLTD TISSUE  |
| 105038 | Mediastinal (thymic) large B-cell lymphoma                   |
| 105085 | T/NK-cell lymphoma                                           |
| 105095 | Follicular lymphoma grade 2                                  |
| 105203 | Nodular lymphoma of intrathoracic lymph nodes                |
| 105375 | Blastic NK-cell lymphoma                                     |
| 105472 | Hodgkin's disease, nodular sclerosis of spleen               |
| 105559 | Anaplastic large cell lymphoma, ALK-positive                 |
| 105636 | Angioimmunoblastic T-cell lymphoma                           |
| 105709 | Enteropathy-associated T-cell lymphoma                       |
| 105762 | UNIFOCAL LANGERHANS-CELL HISTIOCYTOSIS                       |
| 105841 | Nodular sclerosis classical Hodgkin lymphoma                 |
| 105889 | Follicular lymphoma grade 1                                  |
| 105925 | Subcutaneous panniculitic T-cell lymphoma                    |
| 105955 | Anaplastic large cell lymphoma, ALK-negative                 |
| 105966 | EXTRANOD MARG ZONE B-CELL LYMPHOM MUCOSA-ASSOC LYMPHOID TISS |
| 106063 | Other types of follicular lymphoma                           |

|        |                                                             |
|--------|-------------------------------------------------------------|
| 106137 | [M]RETICULOSARCOMAS                                         |
| 106349 | Hodgkin lymphoma NOS                                        |
| 106597 | Lymphocyte-rich classical Hodgkin lymphoma                  |
| 106867 | Non-follicular lymphoma                                     |
| 106884 | Nonfollicular lymphoma                                      |
| 106911 | Hodgkin's, lymphocytic-histiocytic predominance of spleen   |
| 106969 | Diffuse follicle centre lymphoma                            |
| 106970 | [M]Malig lymphoma, lymphocytic, well differentiated,nodular |
| 107032 | Hodgkin's lymphocytic depletion lymph nodes multiple sites  |
| 107166 | Follicular lymphoma grade 3                                 |
| 107804 | Hodgkin's disease NOS of intra-abdominal lymph nodes        |
| 107949 | Hepatosplenic T-cell lymphoma                               |
| 107973 | Follicular lymphoma grade 3b                                |
| 108037 | Unspec malig neop lymphoid/histiocytic of unspecified site  |
| 108102 | Heavy chain disease                                         |
| 108182 | Diffuse non-Hodgkin's small cleaved cell (diffuse) lymphoma |
| 108235 | Waldenstrom macroglobulinaemia                              |
| 108719 | Cutaneous follicle centre lymphoma                          |
| 108775 | Mixed cellularity classical Hodgkin lymphoma                |
| 108886 | Hodgkin's mixed cellularity of lymph nodes inguinal and leg |
| 109342 | Unspec malig neop lymphoid/histiocytic of intrapelvic nodes |
| 109714 | [X]Oth and unspecif peripheral & cutaneous T-cell lymphomas |
| 109780 | Extranodal NK/T-cell lymphoma, nasal type                   |

| icd   | icd_description                                             |
|-------|-------------------------------------------------------------|
| C81   | Hodgkin's disease                                           |
| C81.0 | Hodgkin's disease, lymphocytic predominance                 |
| C81.1 | Hodgkin's disease, nodular sclerosis                        |
| C81.2 | Hodgkin's disease, mixed cellularity                        |
| C81.3 | Hodgkin's disease, lymphocytic depletion                    |
| C81.7 | Hodgkin's disease, other Hodgkin's disease                  |
| C81.9 | Hodgkin's disease, Hodgkin's disease, unspecified           |
| C82   | Follicular [nodular] non-Hodgkin's lymphoma                 |
| C82.0 | Follicular non-Hodgkin's small cleaved cell lymphoma        |
| C82.1 | Follicular non-Hodg mixed sml cleavd & lge cell lymphoma    |
| C82.2 | Follicular non-Hodgkin's large cell lymphoma                |
| C82.7 | Follicular non-Hodgkin's other types of lymphoma            |
| C82.9 | Follicular non-Hodgkin's unspecified lymphoma               |
| C83   | Diffuse non-Hodgkin's lymphoma                              |
| C83.0 | Diffuse non-Hodgkin's small cell (diffuse)lymphoma          |
| C83.1 | Diffuse non-Hodgkin's small cleaved cell (diffuse) lymphoma |

|       |                                                              |
|-------|--------------------------------------------------------------|
| C83.2 | Diffuse non-Hodgkin mixed sml & lge cell (diffuse) lymphoma  |
| C83.3 | Diffuse non-Hodgkin's large cell (diffuse) lymphoma          |
| C83.4 | Diffuse non-Hodgkin's immunoblastic (diffuse) lymphoma       |
| C83.5 | Diffuse non-Hodgkin's lymphoblastic (diffuse) lymphoma       |
| C83.6 | Diffuse non-Hodgkin's lymphoma undifferentiated (diffuse)    |
| C83.7 | Diffuse non-Hodgkin's lymphoma, Burkitt's tumour             |
| C83.8 | Other types of diffuse non-Hodgkin's lymphoma                |
| C83.9 | Diffuse non-Hodgkin's lymphoma, unspecified                  |
| C84   | Peripheral and cutaneous T-cell lymphomas                    |
| C84.0 | Peripheral and cutaneous T-cell lymphomas, mycosis fungoides |
| C84.1 | Peripheral and cutaneous T-cell lymphomas, Sezary's disease  |
| C84.2 | Peripheral and cutaneous T-cell lymphomas, T-zone lymphoma   |
| C84.3 | Periph & cutan T-cell lymphomas, lymphoepithelioid lymphoma  |
| C84.4 | Periph & cutan T-cell lymphomas, peripheral T-cell lymphoma  |
| C84.5 | Periph & cutan T-cell lymphomas, oth & unsp T-cell lymphomas |
| C85   | Other and unspecified types of non-Hodgkin's lymphoma        |
| C85.0 | Oth & unspec types of non-Hodgkin's lymphoma, lymphosarcoma  |
| C85.1 | Oth & unsp types non-Hodgkin's B-cell lymphoma, unsp         |
| C85.7 | Oth specified types of non-Hodgkin's lymphoma                |
| C85.9 | Non-Hodgkin's lymphoma, unspecified type                     |
| C88   | Malignant immunoproliferative diseases                       |
| C88.0 | Waldenstrom's macroglobulinaemia                             |
| C88.1 | Alpha heavy chain disease                                    |
| C88.2 | Gamma heavy chain disease                                    |
| C88.3 | Malignant immunoproliferative small intestinal disease       |
| C88.7 | Other malignant immunoproliferative diseases                 |
| C88.9 | Malignant immunoproliferative disease, unspecified           |
| C96   | Oth & unspec malig neop lymphoid, haematopoietic & rel tiss  |
| C96.0 | Letterer-Siwe disease                                        |
| C96.1 | Malignant histiocytosis                                      |
| C96.2 | Malignant mast cell tumour                                   |
| C96.3 | True histiocyt lymphoma                                      |
| C96.7 | Oth spec malig neop lymphoid h'poietic & related tissue      |
| C96.9 | Malig neop lymphoid haematopoietic and related tissue unspec |

## Leukaemia

| Medcode | Readterm                                 |
|---------|------------------------------------------|
| 4072    | Acute leukaemia NOS                      |
| 4222    | Lymphatic leukaemia                      |
| 4250    | Leukaemia NOS                            |
| 4251    | Acute lymphoid leukaemia                 |
| 4413    | Acute myeloid leukaemia                  |
| 4637    | [M]Leukaemias                            |
| 5137    | Leukaemic reticuloendotheliosis          |
| 5915    | [M]Hairy cell leukaemia                  |
| 6316    | [M]Acute leukaemia NOS                   |
| 7176    | Myeloid leukaemia                        |
| 8625    | Chronic lymphoid leukaemia               |
| 10726   | Chronic myeloid leukaemia                |
| 12146   | [M]Lymphoid leukaemia NOS                |
| 16416   | Chronic leukaemia NOS                    |
| 19372   | Lymphoid leukaemia                       |
| 19974   | Acute monocytic leukaemia                |
| 20440   | Myelomonocytic leukaemia                 |
| 20635   | [M]Lymphatic leukaemia                   |
| 22050   | Chronic myelomonocytic leukaemia         |
| 22071   | [M]Blast cell leukaemia                  |
| 25191   | Leukaemia of unspecified cell type       |
| 27330   | Leukaemic reticuloendotheliosis          |
| 27340   | Di Guglielmo's disease                   |
| 27458   | Chronic monocytic leukaemia              |
| 27520   | Chronic myeloid leukaemia NOS            |
| 27664   | Acute promyelocytic leukaemia            |
| 27790   | Chronic lymphatic leukaemia              |
| 28276   | Acute myelofibrosis                      |
| 29335   | [M]Adult T-cell leukaemia/lymphoma       |
| 30632   | Other specified leukaemia NOS            |
| 31586   | Prolymphocytic leukaemia                 |
| 31701   | Chronic granulocytic leukaemia           |
| 31750   | [M]Chronic leukaemia NOS                 |
| 33344   | Myeloid leukaemia NOS                    |
| 34692   | Other leukaemia of unspecified cell type |
| 35697   | [M]Myeloid leukaemias                    |
| 35875   | Monocytic leukaemia                      |
| 37272   | Other specified leukaemia                |
| 37410   | [M]Acute lymphoid leukaemia              |
| 37461   | Adult T-cell leukaemia                   |

|       |                                                              |
|-------|--------------------------------------------------------------|
| 37487 | [M]Acute myelofibrosis                                       |
| 37723 | [M]Granulocytic leukaemia NOS                                |
| 38331 | Other lymphoid leukaemia NOS                                 |
| 38914 | Lymphoid leukaemia NOS                                       |
| 39629 | Granulocytic sarcoma                                         |
| 40420 | [M]Leukaemias unspecified                                    |
| 41500 | [M]Chronic lymphoid leukaemia                                |
| 41734 | [M]Leukaemia NOS                                             |
| 42297 | [M]Leukaemia NOS                                             |
| 42539 | Acute erythraemia and erythroleukaemia                       |
| 44420 | Refractory anaemia with excess of blasts with transformation |
| 46048 | [M]Prolymphocytic leukaemia                                  |
| 46263 | [M]Acute myelomonocytic leukaemia                            |
| 46444 | [M]Erythroleukaemias                                         |
| 48049 | [M]Chronic myelomonocytic leukaemia                          |
| 48155 | [M]Lymphoid leukaemias                                       |
| 49327 | [M]Acute megakaryoblastic leukaemia                          |
| 49725 | Other lymphoid leukaemia                                     |
| 50858 | Acute panmyelosis                                            |
| 50928 | [M]Burkitt's cell leukaemia                                  |
| 52327 | Chloroma                                                     |
| 52942 | [M]Chronic myeloid leukaemia                                 |
| 54585 | [M]Acute myeloid leukaemia                                   |
| 54793 | Subacute leukaemia NOS                                       |
| 57316 | [M]Acute promyelocytic leukaemia                             |
| 57671 | Megakaryocytic leukaemia                                     |
| 57713 | [M]Eosinophilic leukaemias                                   |
| 59929 | [M]Leukaemia unspecified, NOS                                |
| 61500 | Acute myelomonocytic leukaemia                               |
| 61693 | [X]Other myeloid leukaemia                                   |
| 62330 | [M]Other myeloid leukaemia NOS                               |
| 63475 | Subacute myeloid leukaemia                                   |
| 63570 | [M]Stem cell leukaemia                                       |
| 64963 | [M]Blastic leukaemia                                         |
| 65122 | Leukaemic reticuloendotheliosis of unspecified sites         |
| 65123 | Leukaemic reticuloend of intra-abdominal lymph nodes         |
| 65165 | [X]Other leukaemia of unspecified cell type                  |
| 65721 | Mast cell leukaemia                                          |
| 65777 | Thrombocytic leukaemia                                       |
| 66089 | Other myeloid leukaemia NOS                                  |
| 66694 | [M]Naegeli-type monocytic leukaemia                          |
| 67029 | [X]Other lymphoid leukaemia                                  |
| 67700 | Monoblastic leukaemia                                        |

|        |                                                      |
|--------|------------------------------------------------------|
| 69299  | [M]Thrombocytic leukaemia                            |
| 70724  | Myeloid sarcoma                                      |
| 70935  | [M]Erythroleukaemia                                  |
| 71377  | [M]Eosinophilic leukaemia                            |
| 71850  | [M]Myeloid leukaemia NOS                             |
| 72179  | [M]Subacute leukaemia NOS                            |
| 72197  | Lymphosarcoma cell leukaemia                         |
| 72222  | [M]Megakaryocytic leukaemia                          |
| 72310  | [M]Aleukaemic leukaemia NOS                          |
| 72774  | Subacute lymphoid leukaemia                          |
| 73066  | [M]Miscellaneous leukaemias                          |
| 73088  | [M]Monocytic leukaemia NOS                           |
| 73777  | Leukaemic reticuloendotheliosis NOS                  |
| 87335  | Hairy cell leukaemia                                 |
| 89329  | [X]Other specified leukaemias                        |
| 89762  | [X]Other monocytic leukaemia                         |
| 93342  | Monocytic leukaemia NOS                              |
| 93944  | [M]Chloroma                                          |
| 94174  | Other and unspecified leukaemia                      |
| 96893  | [M]Myeloid sarcoma                                   |
| 98009  | [M]Granulocytic sarcoma                              |
| 99015  | Other monocytic leukaemia                            |
| 99413  | Other and unspecified leukaemia NOS                  |
| 100786 | Chronic eosinophilic leukaemia                       |
| 100927 | [M]Erythroleukaemia NOS                              |
| 101271 | [M]Acute panmyelosis                                 |
| 101606 | Subacute monocytic leukaemia                         |
| 102764 | [M]Acute panmyelosis                                 |
| 102783 | Chronic neutrophilic leukaemia                       |
| 104325 | B-cell acute lymphoblastic leukaemia                 |
| 104328 | B-cell chronic lymphocytic leukaemia                 |
| 104475 | Subacute myelomonocytic leukaemia                    |
| 104788 | Acute myeloblastic leukaemia                         |
| 104939 | Adult T-cell lymphoma/leukaemia (HTLV-1-associated)  |
| 105069 | Juvenile myelomonocytic leukaemia                    |
| 105957 | Chronic myeloid leukaemia, BCR/ABL positive          |
| 106197 | [M]Basophilic leukaemia                              |
| 106483 | [M]Subacute myeloid leukaemia                        |
| 106924 | Clinical stage B chronic lymphocytic leukaemia       |
| 107017 | Chronic lymphocytic leukaemia of B-cell type         |
| 107052 | Clinical stage A chronic lymphocytic leukaemia       |
| 107163 | Clinical stage C chronic lymphocytic leukaemia       |
| 107236 | Atypical chronic myeloid leukaemia, BCR/ABL negative |



|        |                                      |
|--------|--------------------------------------|
| 107643 | T-cell prolymphocytic leukaemia      |
| 107773 | [M]Eosinophilic leukaemia NOS        |
| 108316 | [M]Miscellaneous leukaemia NOS       |
| 108424 | Acute monoblastic leukaemia          |
| 108656 | B-cell prolymphocytic leukaemia      |
| 108715 | Histiocytic leukaemia                |
| 108964 | [M]Juvenile myelomonocytic leukaemia |

| icd   | icd_description                         |
|-------|-----------------------------------------|
| C91   | Lymphoid leukaemia                      |
| C91.0 | Acute lymphoblastic leukaemia           |
| C91.1 | Chronic lymphocytic leukaemia           |
| C91.2 | Subacute lymphocytic leukaemia          |
| C91.3 | Prolymphocytic leukaemia                |
| C91.4 | Hairy-cell leukaemia                    |
| C91.5 | Adult T-cell leukaemia                  |
| C91.7 | Other lymphoid leukaemia                |
| C91.9 | Lymphoid leukaemia, unspecified         |
| C92   | Myeloid leukaemia                       |
| C92.0 | Acute myeloid leukaemia                 |
| C92.1 | Chronic myeloid leukaemia               |
| C92.2 | Subacute myeloid leukaemia              |
| C92.3 | Myeloid sarcoma                         |
| C92.4 | Acute promyelocytic leukaemia           |
| C92.5 | Acute myelomonocytic leukaemia          |
| C92.7 | Other myeloid leukaemia                 |
| C92.9 | Myeloid leukaemia, unspecified          |
| C93   | Monocytic leukaemia                     |
| C93.0 | Acute monocytic leukaemia               |
| C93.1 | Chronic monocytic leukaemia             |
| C93.2 | Subacute monocytic leukaemia            |
| C93.7 | Other monocytic leukaemia               |
| C93.9 | Monocytic leukaemia, unspecified        |
| C94   | Other leukaemias of specified cell type |
| C94.0 | Acute erythraemia & erythroleukaemia    |
| C94.1 | Chronic erythraemia                     |
| C94.2 | Acute megakaryoblastic leukaemia        |
| C94.3 | Mast cell leukaemia                     |
| C94.4 | Acute panmyelosis                       |
| C94.5 | Acute myelofibrosis                     |
| C94.7 | Other specified leukaemias              |

|       |                                       |
|-------|---------------------------------------|
| C95   | Leukaemia of unspecified cell type    |
| C95.0 | Acute leukaemia of unsp cell type     |
| C95.1 | Chronic leukaemia unsp cell type      |
| C95.2 | Subacute leukaemia unsp cell type     |
| C95.7 | Other leukaemia unspecified cell type |
| C95.9 | Leukaemia, unspecified                |

## Myeloma

| Medcode | Readterm                                                    |
|---------|-------------------------------------------------------------|
| 3672    | [M]Myeloma NOS                                              |
| 4944    | Multiple myeloma                                            |
| 15211   | Myelomatosis                                                |
| 18744   | [M]Multiple myeloma                                         |
| 19028   | Solitary myeloma                                            |
| 21329   | Plasmacytoma NOS                                            |
| 22158   | Malignant plasma cell neoplasm, extramedullary plasmacytoma |
| 31671   | [M]Plasma cell myeloma                                      |
| 39187   | Plasma cell leukaemia                                       |
| 39490   | [M]Plasmacytic myeloma                                      |
| 43312   | Myeloma - solitary                                          |
| 43552   | Kahler's disease                                            |
| 46042   | Lambda light chain myeloma                                  |
| 52946   | Bone marrow: myeloma cells                                  |
| 53647   | [M]Myelomatosis                                             |
| 59663   | Neoplasm of uncertain behaviour of plasma cells             |
| 60433   | Osteoporosis in multiple myelomatosis                       |
| 63864   | [M]Plasmacytoma NOS                                         |
| 64618   | [M]Plasma cell leukaemias                                   |
| 73135   | [M]Solitary myeloma                                         |
| 99702   | [M]Plasma cell tumour, malignant                            |
| 102164  | [M]Monostotic myeloma                                       |
| 104418  | Solitary plasmacytoma                                       |
| 38321   | Plasmacytoma NOS                                            |
| 37182   | Multiple myeloma and immunoproliferative neoplasms          |
| 43450   | Immunoproliferative neoplasm or myeloma NOS                 |

| icd   | icd_description                                             |
|-------|-------------------------------------------------------------|
| C90   | Multiple myeloma and malignant plasma cell neoplasms        |
| C90.0 | Multiple myeloma                                            |
| C90.1 | Plasma cell leukaemia                                       |
| C90.2 | Malignant plasma cell neoplasm, extramedullary plasmacytoma |

## Haematopoietic stem cell transplantation

| Medcode | Readterm                                                |
|---------|---------------------------------------------------------|
| 28232   | Peripheral blood stem cell graft                        |
| 86063   | Autologous peripheral blood stem cell transplant        |
| 89920   | Allogeneic peripheral blood stem cell transplant        |
| 18628   | Transfusion of stem cells                               |
| 54420   | Second stage peripheral stem cell infusion              |
| 63236   | First stage peripheral stem cell infusion               |
| 1392    | Bone marrow transplant                                  |
| 15406   | Allograft of bone marrow NEC                            |
| 21021   | Graft of bone marrow                                    |
| 34414   | Autograft of bone marrow                                |
| 52943   | Bone-marrow transplant rejection                        |
| 70870   | Graft of bone marrow NOS                                |
| 72436   | Other specified graft of bone marrow                    |
| 85492   | Allograft of bone marrow from sibling donor             |
| 95840   | Allograft of bone marrow from matched unrelated donor   |
| 98608   | Allograft of bone marrow from unmatched unrelated donor |
| 100912  | Allograft of bone marrow from haploidentical donor      |
| 22726   | Transfusion of bone marrow                              |
| 73013   | Inj.bone marrow - local action                          |
| 93362   | Allograft of cord blood to bone marrow                  |
| 100078  | Graft of cord blood to bone marrow                      |

| icd   | icd_description                  |
|-------|----------------------------------|
| T86.0 | Bone-marrow transplant rejection |

| opcs | description                                             |
|------|---------------------------------------------------------|
| X334 | Autologous peripheral blood stem cell transplant        |
| X335 | Syngeneic peripheral blood stem cell transplant         |
| X336 | Allogeneic peripheral blood stem cell transplant        |
| W34  | Graft of bone marrow                                    |
| W341 | Autograft of bone marrow                                |
| W342 | Allograft of bone marrow NEC                            |
| W343 | Allograft of bone marrow from sibling donor             |
| W344 | Allograft of bone marrow from matched unrelated donor   |
| W345 | Allograft of bone marrow from haploidentical donor      |
| W346 | Allograft of bone marrow from unmatched unrelated donor |
| W348 | Other specified graft of bone marrow                    |

|      |                                                               |
|------|---------------------------------------------------------------|
| W349 | Unspecified graft of bone marrow                              |
| W99  | Graft of cord blood stem cells to bone marrow                 |
| W991 | Allograft of cord blood stem cells to bone marrow             |
| W998 | Other specified graft of cord blood stem cells to bone marrow |
| W999 | Unspecified graft of cord blood stem cells to bone marrow     |

## Other immunosuppressive disease

| Medcode | Readterm                                                    |
|---------|-------------------------------------------------------------|
| 938     | Pancytopenia NOS                                            |
| 5823    | Pancytopenia - acquired                                     |
| 10955   | Di George syndrome                                          |
| 21975   | Common variable immunodeficiency                            |
| 31275   | Pancytopenia with malformation                              |
| 31322   | Wiskott - Aldrich syndrome                                  |
| 31491   | Pancytopenia-dysmelia                                       |
| 42394   | Job's syndrome                                              |
| 42439   | Thrombocytopenic eczema with immunodeficiency               |
| 48293   | Severe combined immunodeficiency                            |
| 57322   | Common variable immunodeficiency                            |
| 61326   | Pancytopenia with pancreatitis                              |
| 62236   | Combined immunity deficiency                                |
| 62328   | Combined immunity deficiency NOS                            |
| 73583   | Ataxia-telangiectasia                                       |
| 30628   | Bone marrow depression                                      |
| 22307   | Patient immunosuppressed                                    |
| 47106   | Patient immunocompromised                                   |
| 31541   | Severe combined immunodeficiency with reticular dysgenesis  |
| 39800   | Immunodeficiency associated+major defect, unspecified       |
| 49542   | Severe combined immunodef with low or normal B-cell numbers |
| 50526   | Major histocompatibility complex class I deficiency         |
| 65617   | Immunodeficiency with short-limbed stature                  |
| 66073   | Severe combined immunodef with low T- and B-cell numbers    |
| 66857   | Common variable immunodef wth autoantibod to B- or T-cells  |
| 72804   | Adenosine deaminase deficiency                              |
| 93936   | Purine nucleoside phosphorylase deficiency                  |
| 103977  | Major histocompatibility complex class II deficiency        |
| 104651  | Immune reconstitution syndrome                              |
| 15422   | Aplastic anaemia                                            |
| 15658   | Acquired aplastic anaemia                                   |
| 16108   | Aplastic anaemia due to chronic disease                     |
| 21723   | Acquired aplastic anaemia NOS                               |
| 41142   | Idiopathic aplastic anaemia                                 |
| 43166   | Aplastic anaemia due to drugs                               |
| 57859   | Aplastic anaemia due to infection                           |
| 66239   | Aplastic anaemia due to toxic cause                         |
| 68087   | Aplastic anaemia NOS                                        |
| 70128   | Radiation aplastic anaemia                                  |
| 73131   | [X]Other common variable immunodeficiency                   |

| icd   | icd_description                                             |
|-------|-------------------------------------------------------------|
| D61.1 | Drug-induced aplastic anaemia                               |
| D61.2 | Aplastic anaemia due to other external agents               |
| D61.3 | Idiopathic aplastic anaemia                                 |
| D61.8 | Other specified aplastic anaemias                           |
| D61.9 | Aplastic anaemia, unspecified                               |
| D81   | Combined immunodeficiencies                                 |
| D81.0 | Severe combined immunodeficiency with reticular dysgenesis  |
| D81.1 | Severe combined immunodef with low T- and B-cell numbers    |
| D81.2 | Severe combined immunodef with low or normal B-cell numbers |
| D81.3 | Adenosine deaminase [ADA] deficiency                        |
| D81.4 | Nezelof's syndrome                                          |
| D81.5 | Purine nucleoside phosphorylase [PNP] deficiency            |
| D81.6 | Major histocompatibility complex class I deficiency         |
| D81.7 | Major histocompatibility complex class II deficiency        |
| D81.8 | Other combined immunodeficiencies                           |
| D81.9 | Combined immunodeficiency, unspecified                      |
| D82.0 | Wiskott-Aldrich syndrome                                    |
| D82.1 | Di George's syndrome                                        |
| D82.2 | immunodeficiency with short-limbed stature                  |
| D83   | Common variable immunodeficiency                            |
| D83.0 | Com var immunodef with predom abn B-cell numb and funct     |
| D83.1 | Common var immunodef predom immunoregulatory T-cell disord  |
| D83.2 | Common variable immunodef autoantibodies to B- or T-cells   |
| D83.8 | Other common variable immunodeficiencies                    |
| D83.9 | Common variable immunodeficiency, unspecified               |
| D89.3 | Immune reconstitution syndrome                              |

## Oral glucocorticoids

| Prodcode | Product name                                                |
|----------|-------------------------------------------------------------|
| 44       | prednisolone enteric coated tablets 5mg                     |
| 95       | prednisolone tablets 5mg                                    |
| 186      | dexamethasone elixir 0.5mg/5ml                              |
| 229      | cortisone acetate tablets 25mg                              |
| 557      | prednisolone enteric coated tablets 2.5mg                   |
| 578      | prednisolone tablets 1mg                                    |
| 955      | prednisolone sodium phosphate soluble tablet 5mg            |
| 1063     | PREDNESOL tablets 5mg [SOVEREIGN]                           |
| 1280     | dexamethasone tablets 2mg                                   |
| 1380     | ENTOCORT CR modified release capsules 3mg [ASTRAZENECA]     |
| 1709     | hydrocortisone pellets 2.5 mg loz                           |
| 1971     | BETNESOL tablets 0.5mg [FOCUS]                              |
| 2044     | prednisone 2.5 mg tab                                       |
| 2130     | methylprednisolone tablets 4mg                              |
| 2368     | prednisolone tablets 2.5mg                                  |
| 2390     | prednisolone e/c 1 mg tab                                   |
| 2704     | prednisolone tablets 25mg                                   |
| 2799     | prednisolone 10 mg tab                                      |
| 2949     | prednisone tablets 5mg                                      |
| 3059     | prednisolone 50 mg tab                                      |
| 3345     | SINTISONE tablets [PHARMACIA]                               |
| 3418     | hydrocortisone tablets 10mg                                 |
| 3557     | prednisone tablets 1mg                                      |
| 3898     | budesonide modified release capsules 3mg                    |
| 3969     | dexamethasone 8 mg tab                                      |
| 3992     | deflazacort tablets 6mg                                     |
| 4535     | hydrocortisone tablets 20mg                                 |
| 4779     | dexamethasone tablets 0.5mg                                 |
| 4943     | dexamethasone sugar free oral solution 2mg/5ml              |
| 5157     | dexamethasone oral solution 2mg/5ml                         |
| 5490     | DELTACORTRIL ENTERIC tablets 5mg [ALLIANCE]                 |
| 5913     | DELTACORTRIL ENTERIC tablets 2.5mg [ALLIANCE]               |
| 6095     | budesonide capsules 3mg                                     |
| 6098     | HYDROCORTONE tablets 10mg [M S D]                           |
| 7286     | betamethasone sodium phosphate soluble tablet 500micrograms |
| 7548     | cortisone acetate capsules 5mg                              |
| 7584     | prednisolone 4 mg tab                                       |
| 7710     | prednisolone 15 mg tab                                      |
| 7934     | prednisone 30 mg tab                                        |
| 8261     | MEDRONE tablets 16mg [PHARMACIA]                            |



|       |                                                   |
|-------|---------------------------------------------------|
| 9375  | deflazacort tablets 1mg                           |
| 9727  | prednisolone tablets 50mg                         |
| 9994  | DECADRON tablets 0.5mg [M S D]                    |
| 10431 | DELTACORTIL 1 MG TAB                              |
| 10552 | methylprednisolone tablets 16mg                   |
| 10574 | cortisone acetate tablets 5mg                     |
| 10683 | MEDRONE tablets 2mg [PHARMACIA]                   |
| 10684 | methylprednisolone tablets 2mg                    |
| 10754 | HYDROCORTISTAB tablets 20mg [WAYMADE]             |
| 10864 | betamethasone tablets 500micrograms               |
| 11149 | BETNELAN tablets 0.5mg [FOCUS]                    |
| 12398 | CORTELAN tablets 25mg [GLAXO]                     |
| 12400 | CORTISYL tablets 25mg [AVENTIS]                   |
| 13043 | HYDROCORTONE tablets 20mg [M S D]                 |
| 13512 | ORADEXON .5 MG TAB                                |
| 13522 | prednisolone 2 mg tab                             |
| 13615 | prednisone 10 mg tab                              |
| 14076 | hydrocortisone sugar free oral suspension 5mg/5ml |
| 14172 | methylprednisolone tablets 100mg                  |
| 15471 | hydrocortisone 25 mg tab                          |
| 15555 | MEDRONE tablets 4mg [PHARMACIA]                   |
| 15617 | LEDERCORT tablets 4mg [WYETH PHAR]                |
| 16525 | BUDENOFALK capsules 3mg [DR FALK]                 |
| 16724 | prednisone 50 mg tab                              |
| 17101 | dexamethasone 750 mcg tab                         |
| 17410 | deflazacort tablets 30mg                          |
| 18042 | MEDRONE tablets 100mg [PHARMACIA]                 |
| 18637 | CORTISTAB tablets 25mg [WAYMADE]                  |
| 18955 | hydrocortisone 4.5 mg loz                         |
| 19141 | PREDNISOLONE soluble tablet 5mg [SOVEREIGN]       |
| 19908 | triamcinolone tablets 2mg                         |
| 20095 | PRECORTISYL FORTE tablets 25mg [AVENTIS]          |
| 20577 | CALCORT tablets 6mg [SHIRE]                       |
| 20670 | prednisolone e/c                                  |
| 20731 | hydrocortisone pellets                            |
| 21218 | DEXSOL oral solution 2mg/5ml [ROSEMONT]           |
| 21417 | PREDNISOLONE tablets 5mg [HILLCROSS]              |
| 21465 | betamethasone .1 mg tab                           |
| 21833 | DECORTISYL tablets 5mg [ROUSSEL]                  |
| 21903 | ORADEXON-ORGANON tablets 2mg [ORGANON]            |
| 22555 | CALCORT tablets 1mg [SHIRE]                       |
| 22827 | betamethasone .1 mg pel                           |
| 23111 | triamcinolone tablets 4mg                         |

|       |                                                       |
|-------|-------------------------------------------------------|
| 23210 | CORTISTAB tablets 5mg [WAYMADE]                       |
| 23512 | PRECORTISYL tablets 5mg [HOECHSTMAR]                  |
| 23788 | cortisone acetate 2.5 mg tab                          |
| 24014 | LEDERCORT tablets 2mg [WYETH PHAR]                    |
| 24716 | prednisolone e/c                                      |
| 25272 | PRECORTISYL tablets 1mg [HOECHSTMAR]                  |
| 26806 | DECADRON 2 MG TAB                                     |
| 27083 | betamethasone valerate .1 mg tab                      |
| 27720 | hydrocortisone                                        |
| 27889 | prednisolone                                          |
| 27959 | prednisolone                                          |
| 27962 | DELTASTAB tablets 1mg [WAYMADE]                       |
| 28375 | PREDNISOLONE enteric coated tablets 2.5mg [HILLCROSS] |
| 28376 | PREDNISOLONE enteric coated tablets 2.5mg [BIOREX]    |
| 28615 | methylprednisolone l/a 4 mg cap                       |
| 28859 | DELTASTAB tablets 5mg [WAYMADE]                       |
| 29112 | CALCORT tablets 30mg [SHIRE]                          |
| 29322 | betamethasone loz                                     |
| 29333 | PREDNISOLONE tablets 5mg [ACTAVIS]                    |
| 30390 | DELTASTAB 2 MG TAB                                    |
| 30971 | DECORTISYL 25 MG TAB                                  |
| 31327 | prednisolone steaglate tablets 6.65mg                 |
| 31532 | PREDNISOLONE enteric coated tablets 5mg [HILLCROSS]   |
| 32803 | PREDNISOLONE enteric coated tablets 5mg [ACTAVIS]     |
| 32835 | PREDNISOLONE tablets 5mg [WOCKHARDT]                  |
| 33639 | cortisone acetate msd 25 mg tab                       |
| 33691 | PREDNISOLONE enteric coated tablets 5mg [BIOREX]      |
| 33988 | PREDNISOLONE tablets 5mg [CO-PHARMA]                  |
| 33990 | PREDNISOLONE tablets 5mg [IVAX]                       |
| 34109 | prednisolone enteric coated tablets 5mg               |
| 34393 | PREDNISOLONE enteric coated tablets 5mg [TEVA]        |
| 34404 | PREDNISOLONE tablets 1mg [ACTAVIS]                    |
| 34452 | PREDNISOLONE tablets 1mg [HILLCROSS]                  |
| 34461 | PREDNISOLONE enteric coated tablets 2.5mg [ACTAVIS]   |
| 34631 | PREDNISOLONE tablets 1mg [CO-PHARMA]                  |
| 34660 | PREDNISOLONE tablets 1mg [KENT]                       |
| 34748 | PREDNISOLONE tablets 1mg [TEVA]                       |
| 34781 | PREDNISOLONE tablets 5mg [KENT]                       |
| 34801 | DEXAMETHASONE elixir 0.5mg/5ml [ROSEMONT]             |
| 34880 | DEXAMETHASONE tablets 2mg [ORGANON]                   |
| 34914 | PREDNISOLONE tablets 1mg [CELLTECH]                   |
| 34915 | DEXAMETHASONE tablets 0.5mg [ORGANON]                 |
| 34978 | PREDNISOLONE tablets 1mg [WOCKHARDT]                  |

|       |                                                                            |
|-------|----------------------------------------------------------------------------|
| 36055 | DEXAMETHASONE tablets 2mg [HILLCROSS]                                      |
| 36686 | cortisone acetate msd 5 mg tab                                             |
| 37203 | beclometasone gastro-resistant modified release tablets 5mg                |
| 38022 | hydrocortisone oral suspension 10mg/5ml                                    |
| 38054 | hydrocortisone tablets                                                     |
| 38407 | prednisolone (roi) tablets 20mg                                            |
| 39067 | CLIPPER gastro-resistant modified release tablets 5mg [CHIESI]             |
| 41335 | CALCORT tablets 6mg [SANOFI/AVE]                                           |
| 41515 | PREDNISOLONE tablets 5mg [TEVA]                                            |
| 41745 | PREDNISOLONE tablets 25mg [WINTHROP]                                       |
| 43544 | PREDNISONONE tablets 5mg [KNOLL]                                           |
| 44380 | prednisone modified release tablet 1mg                                     |
| 44723 | prednisone modified release tablet 5mg                                     |
| 44802 | LODOTRA modified release tablet 5mg [NAPPPHARM]                            |
| 44803 | LODOTRA modified release tablet 2mg [NAPPPHARM]                            |
| 45234 | dexamethasone capsules                                                     |
| 45302 | PREDNISOLONE tablets 5mg [BIOREX]                                          |
| 46711 | prednisone modified release tablet 2mg                                     |
| 47142 | Prednisolone 5mg Soluble tablet (Amdipharm Plc)                            |
| 50225 | Betnesol 500microgram soluble tablets (Waymade Healthcare Plc)             |
| 51722 | Hydrocortisone 5mg/5ml oral suspension                                     |
| 51753 | Prednisolone 1mg tablets (Co-Pharma Ltd)                                   |
| 51824 | Hydrocortisone 5mg/5ml oral suspension sugar free                          |
| 51849 | Hydrocortisone 1mg/5ml oral suspension                                     |
| 51871 | Hydrocortisone 2mg capsules                                                |
| 51872 | Hydrocortisone 2.5mg capsules                                              |
| 52053 | Hydrocortisone 3mg/5ml oral suspension                                     |
| 52396 | Dexamethasone 1mg/5ml oral solution                                        |
| 53143 | Cortisone 25mg tablets (A A H Pharmaceuticals Ltd)                         |
| 53207 | Dexamethasone tablets                                                      |
| 53313 | Prednisolone 20mg/5ml oral suspension                                      |
| 53336 | Prednisolone 25mg tablets (A A H Pharmaceuticals Ltd)                      |
| 53705 | Cortisone acetate 5mg Capsule (Martindale Pharmaceuticals Ltd)             |
| 53953 | Hydrocortisone 5mg modified-release tablets                                |
| 54118 | Prednisolone 25mg/5ml oral suspension                                      |
| 54432 | Lodotra 1mg modified-release tablets (Napp Pharmaceuticals Ltd)            |
| 54434 | Prednisolone 2.5mg/5ml oral suspension                                     |
| 54793 | Dexamethasone 2mg/5ml oral suspension                                      |
| 54794 | Hydrocortisone 20mg modified-release tablets                               |
| 55024 | Prednisolone 5mg/5ml oral solution                                         |
| 55401 | Dexamethasone 500microgram tablets (A A H Pharmaceuticals Ltd)             |
| 55480 | Prednisolone 2.5mg gastro-resistant tablets (Alliance Pharmaceuticals Ltd) |
| 56347 | Dexamethasone 5mg/5ml oral solution                                        |

|       |                                                                                 |
|-------|---------------------------------------------------------------------------------|
| 56891 | Prednisolone 1mg tablets (Waymade Healthcare Plc)                               |
| 57931 | Hydrocortisone 20mg tablets (Teva UK Ltd)                                       |
| 58000 | Prednisolone 5mg tablets (Almus Pharmaceuticals Ltd)                            |
| 58061 | Prednisone 50mg tablets                                                         |
| 58234 | Prednisolone 10mg/5ml oral solution                                             |
| 58369 | Prednisolone 5mg tablets (Boston Healthcare Ltd)                                |
| 58384 | Prednisolone 1mg tablets (Almus Pharmaceuticals Ltd)                            |
| 58474 | Dexamethasone 2mg/5ml oral solution sugar free (A A H Pharmaceuticals Ltd)      |
| 58987 | Prednisolone 5mg gastro-resistant tablets (Phoenix Healthcare Distribution Ltd) |
| 59338 | Prednisolone 1mg/5ml oral solution                                              |
| 59912 | Prednisolone 5mg gastro-resistant tablets (Waymade Healthcare Plc)              |
| 60120 | Dexamethasone 2mg tablets (Alliance Healthcare (Distribution) Ltd)              |
| 60421 | Prednisolone 5mg tablets (Co-Pharma Ltd)                                        |
| 60946 | Entocort CR 3mg capsules (Waymade Healthcare Plc)                               |
| 61132 | Prednisolone 1mg tablets (Boston Healthcare Ltd)                                |
| 61162 | Prednisolone 5mg tablets (Waymade Healthcare Plc)                               |
| 61689 | Prednisolone 5mg soluble tablets (A A H Pharmaceuticals Ltd)                    |
| 62656 | Prednisone 5mg Tablet (Hillcross Pharmaceuticals Ltd)                           |
| 62909 | Dexamethasone 2mg tablets (A A H Pharmaceuticals Ltd)                           |
| 63066 | Prednisolone 2.5mg tablets                                                      |
| 63082 | Prednisolone 20mg tablets                                                       |
| 63138 | Hydrocortisone 5mg/5ml oral solution                                            |
| 63172 | Prednisolone 10mg tablets                                                       |
| 63214 | Prednisolone 5mg soluble tablets (Alliance Healthcare (Distribution) Ltd)       |
| 63549 | Prednisolone 1mg/ml oral solution (Logixx Pharma Solutions Ltd)                 |

## Other immunosuppressants

| Prodcode | Product name                                                               |
|----------|----------------------------------------------------------------------------|
| 58194    | Abatacept 125mg/1ml solution for injection pre-filled syringes             |
| 60030    | Abatacept 250mg powder for solution for infusion vials                     |
| 61366    | Abraxane 100mg powder for suspension for infusion vials (Celgene Ltd)      |
| 47695    | Actinomycin D 500micrograms/vial sterile powder                            |
| 48660    | Adalimumab 40mg/0.8ml solution for injection pre-filled disposable devices |
| 50996    | Adalimumab 40mg/0.8ml solution for injection pre-filled syringes           |
| 56972    | Adalimumab 40mg/0.8ml solution for injection vials                         |
| 6882     | adalimumab injection 40mg                                                  |
| 63866    | Adoport 2mg capsules (Sandoz Ltd)                                          |
| 44804    | ADOPORT twice daily capsules 1mg [SANDOZ]                                  |
| 44640    | ADOPORT twice daily capsules 500 micrograms [SANDOZ]                       |
| 44641    | ADOPORT twice daily capsules 5mg [SANDOZ]                                  |
| 26680    | ADRIAMYCIN injection 10mg/vial [PHARMACIA]                                 |
| 27469    | ADRIAMYCIN injection 50mg/vial [PHARMACIA]                                 |
| 37506    | ADVAGRAF once daily modified release capsules 1mg [ASTELLAS]               |
| 40765    | ADVAGRAF once daily modified release capsules 3mg [ASTELLAS]               |
| 39633    | ADVAGRAF once daily modified release capsules 500 micrograms [ASTELLAS]    |
| 38919    | ADVAGRAF once daily modified release capsules 5mg [ASTELLAS]               |
| 61854    | Afatinib 20mg tablets                                                      |
| 63638    | Afinitor 2.5mg tablets (Novartis Pharmaceuticals UK Ltd)                   |
| 43781    | AFINITOR tablets 10mg [NOVARTIS]                                           |
| 42273    | alemtuzumab concentrate for solution for infusion 30mg/1ml                 |
| 26343    | ALKERAN tablets 2mg [WELLCOME]                                             |
| 23270    | ALKERAN tablets 5mg [WELLCOME]                                             |
| 36726    | anakinra injection 100mg/0.67ml                                            |
| 18460    | ARAVA tablets 100mg [AVENTIS]                                              |
| 16522    | ARAVA tablets 10mg [AVENTIS]                                               |
| 17642    | ARAVA tablets 20mg [AVENTIS]                                               |
| 25904    | Arsenic 10mg/10ml solution for infusion ampoules                           |
| 47789    | Arzip 250mg capsules (Zentiva)                                             |
| 45393    | ARZIP tablets 500mg [WINTHROP]                                             |
| 47194    | Asparaginase 5000 unit/vial Powder for solution for injection (Imported)   |
| 25740    | AVASTIN concentrate for solution for infusion 100mg/4ml [ROCHE]            |
| 58025    | Axitinib 1mg tablets                                                       |
| 62572    | Axitinib 7mg tablets                                                       |
| 59842    | Azacitidine 100mg powder for suspension for injection vials                |
| 12339    | AZAMUNE tablets 50mg [PENN]                                                |
| 3918     | azathioprine 10 mg tab                                                     |
| 8776     | azathioprine 100 mg tab                                                    |
| 55773    | Azathioprine 10mg/5ml oral suspension                                      |

|       |                                                                                |
|-------|--------------------------------------------------------------------------------|
| 15556 | azathioprine 125 mg tab                                                        |
| 52921 | Azathioprine 125mg/5ml oral suspension                                         |
| 53869 | Azathioprine 20mg/5ml oral solution                                            |
| 54982 | Azathioprine 20mg/5ml oral suspension                                          |
| 63121 | Azathioprine 25mg tablets (Alliance Healthcare (Distribution) Ltd)             |
| 59006 | Azathioprine 25mg tablets (Kent Pharmaceuticals Ltd)                           |
| 17206 | azathioprine 50 mg sus                                                         |
| 53956 | Azathioprine 50mg tablets (Almus Pharmaceuticals Ltd)                          |
| 53797 | Azathioprine 50mg tablets (Arrow Generics Ltd)                                 |
| 58654 | Azathioprine 50mg tablets (Sandoz Ltd)                                         |
| 61160 | Azathioprine 50mg tablets (Tillomed Laboratories Ltd)                          |
| 51181 | Azathioprine 60mg/5ml oral solution                                            |
| 770   | azathioprine capsules                                                          |
| 39115 | azathioprine capsules 10mg                                                     |
| 270   | azathioprine injection 50mg/vial                                               |
| 55858 | Azathioprine oral solution                                                     |
| 22982 | azathioprine oral solution 50mg/5ml                                            |
| 36792 | azathioprine oral solution 50mg/ml                                             |
| 35518 | azathioprine oral suspension 50mg/5ml                                          |
| 13320 | azathioprine tablets 10mg                                                      |
| 451   | azathioprine tablets 25mg                                                      |
| 34816 | AZATHIOPRINE tablets 25mg [GEN (UK)]                                           |
| 32101 | AZATHIOPRINE tablets 25mg [HILLCROSS]                                          |
| 571   | azathioprine tablets 50mg                                                      |
| 43562 | AZATHIOPRINE tablets 50mg [ACTAVIS]                                            |
| 41670 | AZATHIOPRINE tablets 50mg [CP PHARM]                                           |
| 34451 | AZATHIOPRINE tablets 50mg [GEN (UK)]                                           |
| 34687 | AZATHIOPRINE tablets 50mg [HILLCROSS]                                          |
| 29340 | AZATHIOPRINE tablets 50mg [IVAX]                                               |
| 31215 | AZATHIOPRINE tablets 50mg [KENT]                                               |
| 41620 | AZATHIOPRINE tablets 50mg [TEVA]                                               |
| 37915 | basiliximab powder for solution for infusion 10mg                              |
| 40632 | basiliximab powder for solution for infusion 20mg                              |
| 57939 | Bendamustine 100mg powder for solution for infusion vials                      |
| 47767 | Bendamustine 25mg powder for solution for infusion vials                       |
| 26261 | BERKAPRINE tablets 50mg [RORER]                                                |
| 38145 | bevacizumab concentrate for solution for infusion 100mg/4ml                    |
| 25851 | Bleo-Kyowa 15,000unit powder for solution for injection vials (ProStrakan Ltd) |
| 32261 | Bleomycin 15,000unit powder for solution for injection vials                   |
| 44740 | bortezomib powder for solution for injection 3.5mg                             |
| 58142 | Brentuximab vedotin 50mg powder for solution for infusion vials                |
| 3874  | busulfan tablets 2mg                                                           |
| 22204 | busulfan tablets 500micrograms                                                 |

|       |                                                                                  |
|-------|----------------------------------------------------------------------------------|
| 60444 | Cabazitaxel 60mg/1.5ml solution for infusion vials                               |
| 56410 | Caelyx 50mg/25ml concentrate for solution for infusion vials (Janssen-Cilag Ltd) |
| 37784 | CAELYX concentrate for solution for infusion 20mg/10ml [JANSSEN]                 |
| 24997 | CAELYX concentrate for solution for infusion 2mg/ml [SCHERING-P]                 |
| 40250 | CAELYX concentrate for solution for infusion 50mg/25ml [JANSSEN]                 |
| 45647 | canakinumab powder for solution for injection 150mg                              |
| 7340  | capecitabine tablets 150mg                                                       |
| 7341  | capecitabine tablets 500mg                                                       |
| 47852 | Capexion 0.5mg capsules (Generics (UK) Ltd)                                      |
| 47512 | Capexion 1mg capsules (Generics (UK) Ltd)                                        |
| 47984 | Capexion 5mg capsules (Generics (UK) Ltd)                                        |
| 47102 | Capimune 50mg capsules (Generics (UK) Ltd)                                       |
| 46395 | CAPIMUNE capsules 100mg [GEN (UK)]                                               |
| 46637 | CAPIMUNE capsules 25mg [GEN (UK)]                                                |
| 47192 | Capsorin 100mg capsules (Morningside Healthcare Ltd)                             |
| 47471 | Capsorin 25mg capsules (Morningside Healthcare Ltd)                              |
| 47047 | Capsorin 50mg capsules (Morningside Healthcare Ltd)                              |
| 61065 | Carboplatin 450mg/45ml solution for infusion vials                               |
| 10328 | carboplatin concentrate for solution for infusion 10mg/ml                        |
| 40781 | carboplatin concentrate for solution for infusion 150mg/15ml                     |
| 35855 | carboplatin concentrate for solution for infusion 50mg/5ml                       |
| 39450 | carboplatin concentrate for solution for infusion 600mg/60ml                     |
| 24096 | carboplatin injection 150mg                                                      |
| 18236 | carboplatin injection 50mg/vial                                                  |
| 41281 | carmustine implant 7.7mg                                                         |
| 20721 | CCNU                                                                             |
| 25848 | CCNU capsules 10mg [LUNDBECK]                                                    |
| 8404  | CCNU capsules 40mg [LUNDBECK]                                                    |
| 52488 | CellCept 250mg capsules (Lexon (UK) Ltd)                                         |
| 57593 | CellCept 500mg tablets (Waymade Healthcare Plc)                                  |
| 16919 | CELLCEPT capsules 250mg [ROCHE]                                                  |
| 21732 | CELLCEPT oral suspension 1g/5ml [ROCHE]                                          |
| 30581 | CELLCEPT powder for concentrate for solution for infusion 500mg [ROCHE]          |
| 18804 | CELLCEPT tablets 500mg [ROCHE]                                                   |
| 45035 | Ceplene 0.5mg/0.5ml solution for injection vials (Meda Pharmaceuticals Ltd)      |
| 44100 | certolizumab pegol injection solution 200mg/1ml                                  |
| 11003 | CERUBIDIN powder for concentrate for solution for injection 20mg/vial [RHONE]    |
| 38158 | Cetuximab 100mg/20ml solution for infusion vials                                 |
| 5600  | chlorambucil tablets 2mg                                                         |
| 8665  | chlorambucil tablets 5mg                                                         |
| 28709 | chlormethine injection 10mg                                                      |
| 26119 | CHLORMETHINE injection 10mg/ml [SOVEREIGN]                                       |
| 47042 | Ciclosporin 100mg Capsule (Hillcross Pharmaceuticals Ltd)                        |

|       |                                                                                               |
|-------|-----------------------------------------------------------------------------------------------|
| 63798 | Ciclosporin 100mg capsules (A A H Pharmaceuticals Ltd)                                        |
| 59250 | Ciclosporin 100mg capsules (Colorama Pharmaceuticals Ltd)                                     |
| 54975 | Ciclosporin 100mg capsules (Cubic Pharmaceuticals Ltd)                                        |
| 48556 | Ciclosporin 100mg capsules (Phoenix Healthcare Distribution Ltd)                              |
| 54134 | Ciclosporin 100mg capsules (Sigma Pharmaceuticals Plc)                                        |
| 47377 | Ciclosporin 25mg Capsule (Hillcross Pharmaceuticals Ltd)                                      |
| 55116 | Ciclosporin 25mg capsules (Cubic Pharmaceuticals Ltd)                                         |
| 62051 | Ciclosporin 25mg capsules (Niche Pharma Ltd)                                                  |
| 48763 | Ciclosporin 25mg capsules (Phoenix Healthcare Distribution Ltd)                               |
| 52743 | Ciclosporin 25mg capsules (Sigma Pharmaceuticals Plc)                                         |
| 59249 | Ciclosporin 50mg capsules (Colorama Pharmaceuticals Ltd)                                      |
| 54974 | Ciclosporin 50mg capsules (Cubic Pharmaceuticals Ltd)                                         |
| 48798 | Ciclosporin 50mg capsules (Phoenix Healthcare Distribution Ltd)                               |
| 54867 | Ciclosporin 50mg capsules (Sigma Pharmaceuticals Plc)                                         |
| 3896  | ciclosporin capsules 100mg                                                                    |
| 16035 | ciclosporin capsules 10mg                                                                     |
| 2838  | ciclosporin capsules 25mg                                                                     |
| 2837  | ciclosporin capsules 50mg                                                                     |
| 42924 | ciclosporin concentrate for solution for infusion 250mg/5ml                                   |
| 38056 | ciclosporin concentrate for solution for infusion 50mg/1ml                                    |
| 19370 | ciclosporin concentrate for solution for infusion 50mg/ml                                     |
| 1626  | ciclosporin oral solution 100mg/ml                                                            |
| 43703 | CIMZIA injection solution 200mg/1ml [UCB]                                                     |
| 48068 | Cisplatin 100mg/100ml solution for infusion vials                                             |
| 38453 | cisplatin concentrate for solution for infusion 10mg/10ml                                     |
| 32824 | cisplatin concentrate for solution for infusion 1mg/ml                                        |
| 44388 | cisplatin concentrate for solution for infusion 50mg/50ml                                     |
| 28324 | cisplatin powder 25mg/vial                                                                    |
| 38185 | cisplatin powder for concentrate for solution for infusion 50mg                               |
| 40454 | cladribine injection 10mg/5ml                                                                 |
| 7480  | cortisone acetate 25 mg inj                                                                   |
| 58496 | Cosmegen Lyovac 500microgram powder for solution for injection vials (Orphan Europe (UK) Ltd) |
| 58758 | Crizotinib 200mg capsules                                                                     |
| 47752 | Cyclophosphamide 25mg tablets                                                                 |
| 26322 | cyclophosphamide injection 100mg                                                              |
| 26066 | cyclophosphamide injection 200mg                                                              |
| 29840 | cyclophosphamide powder for solution for injection 1000mg                                     |
| 16105 | cyclophosphamide powder for solution for injection 500mg                                      |
| 3984  | cyclophosphamide tablets 10mg                                                                 |
| 3985  | cyclophosphamide tablets 50mg                                                                 |
| 34728 | CYCLOPHOSPHAMIDE tablets 50mg [PHARMACIA]                                                     |
| 27656 | CYCLOSPORIN                                                                                   |
| 29518 | CYCLOSPORIN 250MG/5ML                                                                         |



|       |                                                                                             |
|-------|---------------------------------------------------------------------------------------------|
| 19329 | CYCLOSPORIN 250MG/5ML INJ                                                                   |
| 47522 | Cytarabine 100mg/5ml solution for injection vials                                           |
| 41266 | cytarabine injection solution 1g/10ml                                                       |
| 47450 | Cytosar 100mg Injection (Pharmacia Ltd)                                                     |
| 19335 | CYTOSAR injection 500mg [PHARMACIA]                                                         |
| 18238 | dacarbazine powder for solution for injection 100mg                                         |
| 28682 | dacarbazine powder for solution for injection 200mg                                         |
| 42817 | daclizumab concentrate for solution for infusion 25mg/5ml                                   |
| 27071 | dactinomycin powder for solution for injection 500micrograms                                |
| 42390 | dasatinib tablets 100mg                                                                     |
| 37238 | dasatinib tablets 20mg                                                                      |
| 36062 | dasatinib tablets 50mg                                                                      |
| 36957 | dasatinib tablets 70mg                                                                      |
| 43805 | daunorubicin powder for concentrate for solution for injection 20mg/vial                    |
| 13952 | DECADRON injection 4mg/ml [MSD MORSON]                                                      |
| 26454 | DECADRON injection 4mg/ml [MSD MORSON]                                                      |
| 21668 | DECADRON SHOCK PAK 20mg/ml [M S D]                                                          |
| 42449 | DEXIMUNE capsules 100mg [DEXCEL]                                                            |
| 42637 | DEXIMUNE capsules 25mg [DEXCEL]                                                             |
| 42448 | DEXIMUNE capsules 50mg [DEXCEL]                                                             |
| 47755 | Docetaxel 160mg/16ml solution for infusion vials                                            |
| 55155 | Docetaxel 20mg/2ml solution for infusion vials                                              |
| 36831 | docetaxel concentrate for dilution for infusion solution 20mg/0.5ml                         |
| 38999 | docetaxel concentrate for dilution for infusion solution 80mg/2ml                           |
| 33560 | docetaxel concentrate for intravenous infusion 40mg/ml                                      |
| 44425 | docetaxel concentrate for solution for infusion 20mg/1ml                                    |
| 37942 | doxorubicin citrate liposomal complex powder for concentrate for solution for infusion 50mg |
| 55271 | Doxorubicin encapsulated in liposomes 2mg/ml concentrate solution for infusion              |
| 39307 | doxorubicin injection 10mg/5ml                                                              |
| 45026 | doxorubicin injection 200mg/100ml                                                           |
| 26947 | doxorubicin injection 2mg/ml                                                                |
| 30836 | doxorubicin powder for solution for injection 10mg                                          |
| 32204 | DTIC-DOME injection 100mg/vial [BAYER]                                                      |
| 23832 | ELOXATIN powder for concentrate for solution for infusion 100mg [SANOFI S]                  |
| 61373 | Enbrel 50mg/1ml solution for injection 1ml pre-filled MyClic pen (Pfizer Ltd)               |
| 49856 | Enbrel 50mg/1ml solution for injection pre-filled syringes (Pfizer Ltd)                     |
| 35419 | ENBREL injection solution 25mg [PFIZER]                                                     |
| 36556 | ENBREL injection solution 50mg [PFIZER]                                                     |
| 14886 | ENBREL powder for solution for injection 25mg [PFIZER]                                      |
| 19257 | ENBREL powder for solution for injection 50mg [WYETH PHAR]                                  |
| 44309 | ENDOXANA injection 1000mg [BAXTER ONC]                                                      |
| 44273 | ENDOXANA injection 200mg [BAXTER ONC]                                                       |
| 31193 | ENDOXANA tablets 10mg [BAXTER ONC]                                                          |

|       |                                                                              |
|-------|------------------------------------------------------------------------------|
| 10729 | ENDOXANA tablets 50mg [BAXTER ONC]                                           |
| 31539 | epirubicin hydrochloride injection (powder) 20mg                             |
| 39387 | epirubicin hydrochloride injection 100mg/50ml                                |
| 40251 | epirubicin hydrochloride injection 200mg/100ml                               |
| 29652 | epirubicin hydrochloride injection 2mg/ml                                    |
| 40816 | epirubicin hydrochloride injection 50mg/25ml                                 |
| 28325 | epirubicin hydrochloride powder for solution for injection 50mg              |
| 36263 | EPOSIN concentrate for solution for infusion 20mg/ml [MEDAC UK]              |
| 59276 | Eribitux 100mg/20ml solution for infusion vials (Merck Serono Ltd)           |
| 62759 | Eribulin 880micrograms/2ml solution for injection vials                      |
| 60112 | Erivedge 150mg capsules (Roche Products Ltd)                                 |
| 40094 | Erlotinib 100mg tablets                                                      |
| 33827 | Erlotinib 150mg tablets                                                      |
| 45992 | Erlotinib 25mg tablets                                                       |
| 38081 | ERWINASE powder for solution for injection 10000 units/vial [OPI]            |
| 13604 | ESTRACYT capsules 140mg [PHARMACIA]                                          |
| 13735 | estramustine phosphate capsules 140mg                                        |
| 47843 | Etanercept 10mg powder and solvent for solution for injection vials          |
| 56580 | Etanercept 10mg powder and solvent for solution for injection vials          |
| 50494 | Etanercept 50mg/1ml solution for injection 1ml pre-filled disposable devices |
| 50998 | Etanercept 50mg/1ml solution for injection pre-filled syringes               |
| 36008 | etanercept injection solution 25mg                                           |
| 35126 | etanercept injection solution 50mg                                           |
| 15921 | etanercept powder for solution for injection 25mg                            |
| 26387 | etanercept powder for solution for injection 50mg                            |
| 48177 | Etoposide 100mg/5ml solution for infusion vials                              |
| 63011 | Etoposide 500mg/25ml solution for infusion vials                             |
| 18751 | etoposide capsules 100mg                                                     |
| 8756  | etoposide capsules 50mg                                                      |
| 31115 | etoposide concentrate for solution for infusion 20mg/ml                      |
| 44387 | etoposide phosphate lyophilised powder for injection 100mg                   |
| 55683 | Everolimus 10mg tablets                                                      |
| 46070 | everolimus tablets 5mg                                                       |
| 29743 | FLUDARA ORAL tablets 10mg [GENZYME]                                          |
| 24681 | fludarabine powder for solution for injection 50mg                           |
| 18476 | fludarabine tablets 10mg                                                     |
| 58240 | Fluorouracil 2.5g/100ml solution for infusion vials                          |
| 55091 | Fluorouracil 500mg/10ml solution for injection vials                         |
| 18070 | fluorouracil capsules 250mg                                                  |
| 19556 | FLUORO-URACIL capsules 250mg [CAMBRIDGE]                                     |
| 39388 | fluorouracil injection 1g/20ml                                               |
| 20229 | FLUORO-URACIL injection 25mg/ml [CAMBRIDGE]                                  |
| 36575 | fluorouracil injection 50mg/ml                                               |

|       |                                                                                     |
|-------|-------------------------------------------------------------------------------------|
| 41077 | Gefitinib 250mg tablets                                                             |
| 40780 | gemcitabine powder for solution for infusion 1g/vial                                |
| 33418 | gemcitabine powder for solution for infusion 200mg/vial                             |
| 21295 | GLIVEC capsules 100mg [NOVARTIS]                                                    |
| 33823 | GLIVEC tablets 100mg [NOVARTIS]                                                     |
| 28800 | GLIVEC tablets 400mg [NOVARTIS]                                                     |
| 60284 | Golimumab 100mg/1ml solution for injection pre-filled disposable devices            |
| 47398 | Golimumab 50mg/0.5ml solution for injection pre-filled syringes                     |
| 46370 | golimumab pre-filled pen injection solution 50mg                                    |
| 27292 | Herceptin 150mg powder for solution for infusion vials (Roche Products Ltd)         |
| 58819 | Herceptin 600mg/5ml solution for injection vials (Roche Products Ltd)               |
| 50121 | Humira 40mg/0.8ml solution for injection pre-filled disposable devices (AbbVie Ltd) |
| 52833 | Humira 40mg/0.8ml solution for injection pre-filled syringes (AbbVie Ltd)           |
| 56593 | Humira 40mg/0.8ml solution for injection vials (AbbVie Ltd)                         |
| 23850 | HUMIRA injection 40mg [ABBOTT]                                                      |
| 33227 | HYCANTIN powder for concentrate for solution for infusion 4mg [GLAXSK PHA]          |
| 6884  | HYDREA capsules 500mg [SQUIBB]                                                      |
| 4257  | hydrocortisone 100 mg inj                                                           |
| 3788  | hydrocortisone i/v 100 mg inj                                                       |
| 47127 | Hydroxycarbamide 100mg tablets                                                      |
| 50565 | Hydroxycarbamide 300mg capsules                                                     |
| 59007 | Hydroxycarbamide 500mg capsules (A A H Pharmaceuticals Ltd)                         |
| 62157 | Hydroxycarbamide 500mg/5ml oral suspension                                          |
| 6333  | hydroxycarbamide capsules 500mg                                                     |
| 33330 | HYDROXYCARBAMIDE capsules 500mg [MEDAC UK]                                          |
| 39548 | hydroxycarbamide film coated tablets 1000mg                                         |
| 38319 | hydroxycarbamide oral solution 500mg/5ml                                            |
| 3873  | hydroxyurea capsules 500mg                                                          |
| 31339 | idarubicin hydrochloride capsules 10mg                                              |
| 31984 | idarubicin hydrochloride capsules 5mg                                               |
| 43168 | ifosfamide injection 2g/vial                                                        |
| 21286 | imatinib capsules 100mg                                                             |
| 29229 | imatinib tablets 100mg                                                              |
| 21318 | imatinib tablets 400mg                                                              |
| 21899 | IMMUNOPRIN tablets 50mg [ASHBOURNE]                                                 |
| 1901  | IMURAN 10 MG TAB                                                                    |
| 14395 | IMURAN injection 50mg/vial [ASPEN EURO]                                             |
| 30495 | IMURAN tablets 10mg [WELLCOME]                                                      |
| 43077 | IMURAN tablets 25mg [ASPEN EURO]                                                    |
| 671   | IMURAN tablets 25mg [WELLCOME]                                                      |
| 42988 | IMURAN tablets 50mg [ASPEN EURO]                                                    |
| 1899  | IMURAN tablets 50mg [WELLCOME]                                                      |
| 16822 | infliximab powder for concentrate for solution for infusion 100mg                   |

|       |                                                                                            |
|-------|--------------------------------------------------------------------------------------------|
| 58862 | Ipilimumab 200mg/40ml solution for infusion vials                                          |
| 56041 | Ipilimumab 50mg/10ml solution for infusion vials                                           |
| 46563 | Iressa 250mg tablets (AstraZeneca UK Ltd)                                                  |
| 59339 | Irinotecan 40mg/2ml concentrate for solution for infusion vials (Hospira UK Ltd)           |
| 40983 | irinotecan hydrochloride concentrate for solution for infusion 40mg/2ml                    |
| 32418 | KINERET injection 100mg/0.67ml [AMGEN]                                                     |
| 26502 | LANVIS tablets 40mg [ALKOPHARMA]                                                           |
| 46837 | Lapatinib 250mg tablets                                                                    |
| 48217 | Leflunomide 10mg tablets (medac UK)                                                        |
| 62007 | Leflunomide 15mg tablets                                                                   |
| 62993 | Leflunomide 20mg tablets (Sandoz Ltd)                                                      |
| 4970  | leflunomide tablets 100mg                                                                  |
| 4971  | leflunomide tablets 10mg                                                                   |
| 6934  | leflunomide tablets 20mg                                                                   |
| 60630 | Lenalidomide 2.5mg capsules                                                                |
| 44529 | lenalidomide capsules 10mg                                                                 |
| 46205 | lenalidomide capsules 15mg                                                                 |
| 40626 | lenalidomide capsules 25mg                                                                 |
| 42056 | lenalidomide capsules 5mg                                                                  |
| 16838 | LEUKERAN tablets 2mg [WELLCOME]                                                            |
| 26315 | LEUKERAN tablets 5mg [WELLCOME]                                                            |
| 12067 | lomustine capsules 40mg                                                                    |
| 44478 | LYSODREN tablets 500mg [LAB HRA]                                                           |
| 55815 | MabCampath 30mg/1ml concentrate for solution for infusion vials (Genzyme Therapeutics Ltd) |
| 31598 | MABCAMPATH concentrate for solution for infusion 10mg/ml [SCHERING]                        |
| 47502 | MabThera 100mg/10ml concentrate for solution for infusion vials (Roche Products Ltd)       |
| 27342 | MAXTREX injection 2.5mg/ml [PHARMACIA]                                                     |
| 21753 | MAXTREX tablets 10mg [PHARMACIA]                                                           |
| 13428 | MAXTREX tablets 2.5mg [PHARMACIA]                                                          |
| 26580 | melphalan injection 100mg/vial                                                             |
| 37099 | melphalan powder for solution for injection 50mg                                           |
| 16929 | melphalan tablets 2mg                                                                      |
| 12150 | melphalan tablets 5mg                                                                      |
| 57239 | Mercaptopurine 20mg/ml oral suspension                                                     |
| 56753 | Mercaptopurine 25mg tablets                                                                |
| 55772 | Mercaptopurine 25mg/5ml oral suspension                                                    |
| 61545 | Mercaptopurine 50mg tablets (Aspen Pharma Trading Ltd)                                     |
| 52333 | Mercaptopurine 75mg/5ml oral suspension                                                    |
| 19982 | mercaptopurine capsules 10mg                                                               |
| 47369 | Mercaptopurine Oral solution                                                               |
| 32972 | mercaptopurine tablets 10mg                                                                |
| 3450  | mercaptopurine tablets 50mg                                                                |
| 27579 | methotrexate                                                                               |

|       |                                                                                 |
|-------|---------------------------------------------------------------------------------|
| 57441 | Methotrexate 10mg tablets (A A H Pharmaceuticals Ltd)                           |
| 58885 | Methotrexate 10mg tablets (Sigma Pharmaceuticals Plc)                           |
| 59538 | Methotrexate 10mg tablets (Teva UK Ltd)                                         |
| 57174 | Methotrexate 10mg tablets (Waymade Healthcare Plc)                              |
| 61151 | Methotrexate 10mg/0.2ml solution for injection pre-filled disposable devices    |
| 61081 | Methotrexate 12.5mg/0.25ml solution for injection pre-filled disposable devices |
| 61273 | Methotrexate 15mg/0.3ml solution for injection pre-filled disposable devices    |
| 61137 | Methotrexate 17.5mg/0.35ml solution for injection pre-filled disposable devices |
| 56037 | Methotrexate 2.5mg tablets (A A H Pharmaceuticals Ltd)                          |
| 51120 | Methotrexate 2.5mg tablets (Alliance Healthcare (Distribution) Ltd)             |
| 62833 | Methotrexate 2.5mg tablets (DE Pharmaceuticals)                                 |
| 60979 | Methotrexate 2.5mg tablets (Morningside Healthcare Ltd)                         |
| 58303 | Methotrexate 2.5mg tablets (Orion Pharma (UK) Ltd)                              |
| 49951 | Methotrexate 2.5mg tablets (Sandoz Ltd)                                         |
| 52606 | Methotrexate 2.5mg tablets (Sigma Pharmaceuticals Plc)                          |
| 59685 | Methotrexate 2.5mg tablets (Teva UK Ltd)                                        |
| 53385 | Methotrexate 2.5mg tablets (Waymade Healthcare Plc)                             |
| 61085 | Methotrexate 2.5mg tablets (Waymade Healthcare Plc)                             |
| 51667 | Methotrexate 200mg/8ml solution for injection vials                             |
| 61140 | Methotrexate 20mg/0.4ml solution for injection pre-filled disposable devices    |
| 61082 | Methotrexate 22.5mg/0.45ml solution for injection pre-filled disposable devices |
| 61122 | Methotrexate 25mg/0.5ml solution for injection pre-filled disposable devices    |
| 21889 | methotrexate 25mg/1ml                                                           |
| 62753 | Methotrexate 27.5mg/0.55ml solution for injection pre-filled syringes           |
| 61796 | Methotrexate 30mg/0.6ml solution for injection pre-filled disposable devices    |
| 51321 | Methotrexate 50mg/2ml solution for injection vials                              |
| 53696 | Methotrexate 50mg/2ml solution for injection vials (A A H Pharmaceuticals Ltd)  |
| 49547 | Methotrexate 5g/200ml solution for infusion vials                               |
| 61172 | Methotrexate 7.5mg/0.15ml solution for injection pre-filled disposable devices  |
| 59723 | Methotrexate 7.5mg/5ml oral solution                                            |
| 36167 | methotrexate injection 1000mg/10ml                                              |
| 46407 | methotrexate injection 1000mg/40ml                                              |
| 12816 | methotrexate injection 100mg/ml                                                 |
| 40371 | methotrexate injection 10mg/0.2ml                                               |
| 7337  | methotrexate injection 10mg/0.4ml                                               |
| 32865 | methotrexate injection 10mg/1ml                                                 |
| 46152 | methotrexate injection 12.5mg/0.25ml                                            |
| 7336  | methotrexate injection 12.5mg/0.5ml                                             |
| 40281 | methotrexate injection 15mg/0.3ml                                               |
| 16540 | methotrexate injection 15mg/0.6ml                                               |
| 27404 | methotrexate injection 15mg/1.5ml                                               |
| 46156 | methotrexate injection 17.5mg/0.35ml                                            |
| 18890 | methotrexate injection 17.5mg/0.7ml                                             |

|       |                                                      |
|-------|------------------------------------------------------|
| 40273 | methotrexate injection 20mg/0.4ml                    |
| 14347 | methotrexate injection 20mg/0.8ml                    |
| 34258 | METHOTREXATE injection 20mg/0.8ml [CENT HOME]        |
| 45165 | methotrexate injection 20mg/1ml                      |
| 26064 | methotrexate injection 20mg/2ml                      |
| 46129 | methotrexate injection 22.5mg/0.45ml                 |
| 17672 | methotrexate injection 22.5mg/0.9ml                  |
| 40328 | methotrexate injection 25mg/0.5ml                    |
| 45558 | methotrexate injection 25mg/1.25ml                   |
| 16519 | methotrexate injection 25mg/1ml                      |
| 24634 | methotrexate injection 25mg/2.5ml                    |
| 8583  | methotrexate injection 25mg/ml                       |
| 27642 | methotrexate injection 27.5mg/1.1ml                  |
| 44908 | methotrexate injection 30mg/0.6ml                    |
| 30703 | methotrexate injection 30mg/1.2ml                    |
| 46039 | methotrexate injection 30mg/1.5ml                    |
| 41086 | methotrexate injection 5000mg/50ml                   |
| 32229 | methotrexate injection 500mg/20ml                    |
| 24783 | methotrexate injection 50mg/2ml                      |
| 8327  | methotrexate injection 50mg/3ml                      |
| 30932 | methotrexate injection 5mg/0.2ml                     |
| 9528  | methotrexate injection 5mg/2ml                       |
| 40301 | methotrexate injection 7.5mg/0.15ml                  |
| 16570 | methotrexate injection 7.5mg/0.3ml                   |
| 35402 | methotrexate injection 7.5mg/0.75ml                  |
| 36800 | methotrexate oral solution 10mg/5ml                  |
| 36849 | methotrexate oral suspension 10mg/5ml                |
| 28041 | methotrexate oral suspension 12.5mg/5ml              |
| 35752 | methotrexate oral suspension 7.5mg/5ml               |
| 14748 | methotrexate sodium injection 25mg/ml                |
| 18424 | methotrexate sodium tablets 2.5mg                    |
| 41585 | METHOTREXATE SODIUM tablets 2.5mg [WYETH PHAR]       |
| 29069 | methotrexate sterile powder 500mg/vial               |
| 17035 | methotrexate suspension 2.5mg/5ml                    |
| 877   | methotrexate tablets 10mg                            |
| 34929 | METHOTREXATE tablets 10mg [HOSPIRA]                  |
| 823   | methotrexate tablets 2.5mg                           |
| 41104 | METHOTREXATE tablets 2.5mg [CP PHARM]                |
| 20951 | METHOTREXATE tablets 2.5mg [GOLDSHIELD]              |
| 32111 | METHOTREXATE tablets 2.5mg [HOSPIRA]                 |
| 30780 | METHOTREXATE tablets 2.5mg [PHARMACIA]               |
| 9117  | methylprednisolone 40 mg/ml inj                      |
| 2181  | methylprednisolone/lignocaine hcl (1ml) 40 mg/ml inj |

|       |                                                                                 |
|-------|---------------------------------------------------------------------------------|
| 57103 | Metoject 27.5mg/0.55ml solution for injection pre-filled syringes (medac UK)    |
| 50950 | Metoject 30mg/0.6ml solution for injection pre-filled syringes (medac UK)       |
| 40356 | METOJECT injection 10mg/0.2ml [MEDAC UK]                                        |
| 37117 | METOJECT injection 10mg/1ml [MEDAC UK]                                          |
| 46098 | METOJECT injection 12.5mg/0.25ml [MEDAC UK]                                     |
| 40284 | METOJECT injection 15mg/0.3ml [MEDAC UK]                                        |
| 27400 | METOJECT injection 15mg/1.5ml [MEDAC UK]                                        |
| 46265 | METOJECT injection 17.5mg/0.35ml [MEDAC UK]                                     |
| 40292 | METOJECT injection 20mg/0.4ml [MEDAC UK]                                        |
| 14348 | METOJECT injection 20mg/2ml [MEDAC UK]                                          |
| 46197 | METOJECT injection 22.5mg/0.45ml [MEDAC UK]                                     |
| 40293 | METOJECT injection 25mg/0.5ml [MEDAC UK]                                        |
| 33601 | METOJECT injection 25mg/2.5ml [MEDAC UK]                                        |
| 40280 | METOJECT injection 7.5mg/0.15ml [MEDAC UK]                                      |
| 35865 | METOJECT injection 7.5mg/0.75ml [MEDAC UK]                                      |
| 61050 | Metoject PEN 10mg/0.2ml solution for injection pre-filled pen (medac UK)        |
| 61211 | Metoject PEN 12.5mg/0.25ml solution for injection pre-filled pen (medac UK)     |
| 61171 | Metoject PEN 15mg/0.3ml solution for injection pre-filled pen (medac UK)        |
| 61181 | Metoject PEN 17.5mg/0.35ml solution for injection pre-filled pen (medac UK)     |
| 61180 | Metoject PEN 20mg/0.4ml solution for injection pre-filled pen (medac UK)        |
| 61419 | Metoject PEN 22.5mg/0.45ml solution for injection pre-filled pen (medac UK)     |
| 61169 | Metoject PEN 25mg/0.5ml solution for injection pre-filled pen (medac UK)        |
| 62421 | Metoject PEN 27.5mg/0.55ml solution for injection pre-filled pen (medac UK)     |
| 61488 | Metoject PEN 30mg/0.6ml solution for injection pre-filled pen (medac UK)        |
| 61178 | Metoject PEN 7.5mg/0.15ml solution for injection pre-filled pen (medac UK)      |
| 30014 | MITHRACIN injection 2.5mg/vial [PFIZER]                                         |
| 31494 | mithramycin injection 2.5mg/vial                                                |
| 30757 | mitobronitol (named patient only) 125 mg tab                                    |
| 113   | Mitomycin 10mg powder for solution for injection vials                          |
| 61458 | Mitomycin 20mg powder for solution for injection vials                          |
| 19287 | Mitomycin 2mg powder for solution for injection vials                           |
| 32593 | Mitomycin 40mg powder for solution for injection vials                          |
| 44594 | Mitomycin-C Kyowa 10mg powder for solution for injection vials (ProStrakan Ltd) |
| 30051 | Mitomycin-C Kyowa 2mg powder for solution for injection vials (ProStrakan Ltd)  |
| 48007 | Mitomycin-C Kyowa 40mg powder for solution for injection vials (ProStrakan Ltd) |
| 35826 | mitotane tablets 500mg                                                          |
| 39366 | mitoxantrone concentrate for solution for infusion 10mg/5ml                     |
| 41267 | mitoxantrone concentrate for solution for infusion 20mg/10ml                    |
| 33174 | mitoxantrone concentrate for solution for infusion 2mg/ml                       |
| 46325 | MODIGRAF granules for oral suspension 1mg [ASTELLAS]                            |
| 46324 | MODIGRAF granules for oral suspension 200micrograms [ASTELLAS]                  |
| 57272 | Mycophenolate mofetil 125mg/5ml oral suspension                                 |
| 60231 | Mycophenolate mofetil 250mg capsules (A A H Pharmaceuticals Ltd)                |

|       |                                                                                                |
|-------|------------------------------------------------------------------------------------------------|
| 54317 | Mycophenolate mofetil 250mg capsules (Sandoz Ltd)                                              |
| 53255 | Mycophenolate mofetil 250mg capsules (Sigma Pharmaceuticals Plc)                               |
| 58530 | Mycophenolate mofetil 500mg tablets (Sigma Pharmaceuticals Plc)                                |
| 4438  | mycophenolate mofetil capsules 250mg                                                           |
| 16879 | mycophenolate mofetil oral suspension 1g/5ml                                                   |
| 7077  | mycophenolate mofetil powder for concentrate for solution for infusion 500mg                   |
| 4230  | mycophenolate mofetil tablets 500mg                                                            |
| 50669 | Mycophenolate motefil 500mg tablets (Sandoz Ltd)                                               |
| 47746 | Mycophenolate motefil 500mg tablets (Wockhardt UK Ltd)                                         |
| 35301 | mycophenolic acid gastro-resistant tablets 180mg                                               |
| 26097 | mycophenolic acid gastro-resistant tablets 360mg                                               |
| 37395 | MYELOBROMOL (NAMED PATIENT ONLY) 125 MG TAB                                                    |
| 37396 | MYELOBROMOL tablets 125mg [DURBIN]                                                             |
| 45489 | MYFENAX capsules 250mg [TEVA]                                                                  |
| 45043 | MYFENAX tablets 500mg [TEVA]                                                                   |
| 27290 | MYFORTIC tablets 180mg [NOVARTIS]                                                              |
| 27289 | MYFORTIC tablets 360mg [NOVARTIS]                                                              |
| 26301 | MYLERAN tablets 2mg [WELLCOME]                                                                 |
| 32412 | MYLERAN tablets 500micrograms [WELLCOME]                                                       |
| 33878 | MYOCET powder for concentrate for solution for infusion 50mg [CEPHALON]                        |
| 41191 | natalizumab concentrate for solution for infusion 300mg/15ml                                   |
| 28605 | NATULAN capsules 50mg [CAMBRIDGE]                                                              |
| 52615 | Neoral 100mg capsules (Sigma Pharmaceuticals Plc)                                              |
| 49958 | Neoral 25mg capsules (DE Pharmaceuticals)                                                      |
| 53175 | Neoral 25mg capsules (Mawdsley-Brooks & Company Ltd)                                           |
| 53176 | Neoral 50mg capsules (DE Pharmaceuticals)                                                      |
| 973   | NEORAL capsules 100mg [NOVARTIS]                                                               |
| 16137 | NEORAL capsules 10mg [NOVARTIS]                                                                |
| 972   | NEORAL capsules 25mg [NOVARTIS]                                                                |
| 4231  | NEORAL capsules 50mg [NOVARTIS]                                                                |
| 1905  | NEORAL oral solution 100mg/ml [NOVARTIS]                                                       |
| 42362 | Nexavar 200mg tablets (Bayer Plc)                                                              |
| 45820 | nilotinib capsules 150mg                                                                       |
| 38317 | nilotinib capsules 200mg                                                                       |
| 15405 | NOVANTRONE concentrate for solution for infusion 2mg/ml [WYETH PHAR]                           |
| 60707 | Ofatumumab 100mg/5ml solution for infusion vials                                               |
| 27224 | Oncovin 2mg Injection (Eli Lilly and Company Ltd)                                              |
| 19072 | OPRISINE tablets 50mg [OPUS]                                                                   |
| 50277 | Oxaliplatin 100mg/20ml concentrate for solution for infusion vials (A A H Pharmaceuticals Ltd) |
| 58942 | Oxaliplatin 200mg/40ml concentrate for solution for infusion vials (Accord Healthcare Ltd)     |
| 39895 | oxaliplatin concentrate for solution for infusion 100mg/20ml                                   |
| 39553 | oxaliplatin concentrate for solution for infusion 50mg/10ml                                    |
| 36714 | oxaliplatin powder for concentrate for solution for infusion 100mg                             |



|       |                                                                              |
|-------|------------------------------------------------------------------------------|
| 27293 | oxaliplatin powder for concentrate for solution for infusion 50mg            |
| 47754 | Paclitaxel 100mg/16.7ml solution for infusion vials                          |
| 39919 | paclitaxel albumin bound powder for suspension for infusion 100mg            |
| 45147 | paclitaxel concentrate for solution for infusion 150mg/25ml                  |
| 35854 | paclitaxel concentrate for solution for infusion 30mg/5ml                    |
| 14381 | paclitaxel concentrate for solution for infusion 6mg/ml                      |
| 45122 | Panitumumab 100mg/5ml solution for infusion vials                            |
| 41963 | PARAPLATIN concentrate for solution for infusion 10mg/ml [BRISTOL]           |
| 37542 | PARAPLATIN injection 150mg [BRISTOL]                                         |
| 47552 | Pazopanib 200mg tablets                                                      |
| 46823 | Pazopanib 400mg tablets                                                      |
| 37272 | pemetrexed powder for concentrate for solution for infusion 500mg            |
| 43888 | pentostatin powder for solution for injection 10mg                           |
| 61908 | Pertuzumab 420mg/14ml solution for infusion vials                            |
| 28889 | PHARMORUBICIN injection solution 2mg/ml [PHARMACIA]                          |
| 43639 | PHARMORUBICIN powder for solution for injection 50mg [PHARMACIA]             |
| 59048 | Pomalidomide 2mg capsules                                                    |
| 8306  | Prednisolone 25mg/1ml suspension for injection ampoules                      |
| 24657 | prednisolone pivalate 50 mg inj                                              |
| 27428 | prednisolone sodium phosphate 16 mg inj                                      |
| 17186 | procarbazine capsules 50mg                                                   |
| 52993 | Prograf 1mg capsules (DE Pharmaceuticals)                                    |
| 54198 | Prograf 1mg capsules (Lexon (UK) Ltd)                                        |
| 51184 | Prograf 1mg capsules (Necessity Supplies Ltd)                                |
| 51185 | Prograf 500microgram capsules (Necessity Supplies Ltd)                       |
| 3683  | PROGRAF twice daily capsules 1mg [ASTELLAS]                                  |
| 5870  | PROGRAF twice daily capsules 500 micrograms [ASTELLAS]                       |
| 13271 | PROGRAF twice daily capsules 5mg [ASTELLAS]                                  |
| 29675 | PURI-NETHOL tablets 50mg [ALKOPHARMA]                                        |
| 44222 | raltitrexed powder for concentrate for solution for infusion 2mg             |
| 63210 | Rapamune 0.5mg tablets (Pfizer Ltd)                                          |
| 33728 | RAPAMUNE oral solution 1mg/ml [PFIZER]                                       |
| 23289 | RAPAMUNE tablets 1mg [PFIZER]                                                |
| 28999 | RAPAMUNE tablets 2mg [PFIZER]                                                |
| 22640 | razoxane tablets 125mg                                                       |
| 12066 | RAZOXIN tablets 125mg [CAMBRIDGE]                                            |
| 22392 | REMICADE powder for concentrate for solution for infusion 100mg [SCHERING-P] |
| 58227 | Revlimid 10mg capsules (Celgene Ltd)                                         |
| 56818 | Revlimid 15mg capsules (Celgene Ltd)                                         |
| 41139 | REVLIMID capsules 25mg [CELGENE]                                             |
| 39111 | rituximab concentrate for intravenous infusion 10mg/ml                       |
| 28490 | rituximab concentrate for solution for infusion 100mg/10ml                   |
| 36294 | rituximab concentrate for solution for infusion 500mg/50ml                   |

|       |                                                                                                     |
|-------|-----------------------------------------------------------------------------------------------------|
| 56962 | RoActemra 200mg/10ml concentrate for solution for infusion vials (Roche Products Ltd)               |
| 59434 | Ruxolitinib 15mg tablets                                                                            |
| 60008 | Ruxolitinib 20mg tablets                                                                            |
| 13556 | SANDIMMUN capsules 100mg [NOVARTIS]                                                                 |
| 3920  | SANDIMMUN capsules 25mg [NOVARTIS]                                                                  |
| 15596 | SANDIMMUN capsules 50mg [NOVARTIS]                                                                  |
| 26790 | SANDIMMUN concentrate for solution for infusion 50mg/ml [NOVARTIS]                                  |
| 13494 | SANDIMMUN sugar free solution 100mg/ml [NOVARTIS]                                                   |
| 62618 | Simponi 100mg/1ml solution for injection pre-filled pen (Merck Sharp & Dohme Ltd)                   |
| 47740 | Simponi 50mg/0.5ml solution for injection pre-filled disposable devices (Merck Sharp & Dohme Ltd)   |
| 61351 | Simulect 10mg powder and solvent for solution for injection vials (Novartis Pharmaceuticals UK Ltd) |
| 32614 | SIMULECT powder for solution for infusion 20mg [NOVARTIS]                                           |
| 20097 | sirolimus oral solution 1mg/ml                                                                      |
| 6600  | sirolimus tablets 1mg                                                                               |
| 6484  | sirolimus tablets 2mg                                                                               |
| 44783 | sirolimus tablets 500 micrograms                                                                    |
| 35685 | Sorafenib 200mg tablets                                                                             |
| 58174 | Stelara 45mg/0.5ml solution for injection pre-filled syringes (Janssen-Cilag Ltd)                   |
| 38871 | Sunitinib 12.5mg capsules                                                                           |
| 44063 | Sunitinib 25mg capsules                                                                             |
| 40580 | Sunitinib 50mg capsules                                                                             |
| 39795 | Sutent 12.5mg capsules (Pfizer Ltd)                                                                 |
| 42993 | Sutent 25mg capsules (Pfizer Ltd)                                                                   |
| 45450 | Sutent 50mg capsules (Pfizer Ltd)                                                                   |
| 47416 | Tacni 0.5mg capsules (Teva UK Ltd)                                                                  |
| 47276 | Tacni 1mg capsules (Teva UK Ltd)                                                                    |
| 47506 | Tacni 5mg capsules (Teva UK Ltd)                                                                    |
| 48339 | Tacrolimus 1mg capsules (A A H Pharmaceuticals Ltd)                                                 |
| 55066 | Tacrolimus 2.5mg/5ml oral solution                                                                  |
| 51790 | Tacrolimus 500microgram capsules (A A H Pharmaceuticals Ltd)                                        |
| 54048 | Tacrolimus 500micrograms/5ml oral suspension                                                        |
| 47432 | Tacrolimus 5mg/5ml oral suspension                                                                  |
| 63720 | Tacrolimus 750microgram capsules                                                                    |
| 33123 | tacrolimus concentrate for solution for infusion 5mg/1ml                                            |
| 43081 | tacrolimus granules for oral suspension 1mg                                                         |
| 43082 | tacrolimus granules for oral suspension 200micrograms                                               |
| 37985 | tacrolimus once daily modified release capsules 1mg                                                 |
| 40964 | tacrolimus once daily modified release capsules 3mg                                                 |
| 38113 | tacrolimus once daily modified release capsules 500 micrograms                                      |
| 38989 | tacrolimus once daily modified release capsules 5mg                                                 |
| 44926 | tacrolimus oral suspension 2.5mg/5ml                                                                |
| 37155 | tacrolimus suspension 1mg/ml                                                                        |
| 2839  | tacrolimus twice daily capsules 1mg                                                                 |

|       |                                                                                 |
|-------|---------------------------------------------------------------------------------|
| 6495  | tacrolimus twice daily capsules 500 micrograms                                  |
| 5089  | tacrolimus twice daily capsules 5mg                                             |
| 63202 | Tafinlar 75mg capsules (GlaxoSmithKline UK Ltd)                                 |
| 47556 | Tarceva 100mg tablets (Roche Products Ltd)                                      |
| 25262 | Tarceva 150mg tablets (Roche Products Ltd)                                      |
| 37441 | Tarceva 25mg tablets (Roche Products Ltd)                                       |
| 40379 | Targretin 75mg capsules (Eisai Ltd)                                             |
| 35384 | TAXOL concentrate for solution for infusion 30mg/5ml [BMS]                      |
| 16173 | TAXOL concentrate for solution for infusion 6mg/ml [BMS]                        |
| 47571 | Taxotere 160mg/8ml concentrate for solution for infusion vials (Sanofi)         |
| 23849 | TAXOTERE concentrate for intravenous infusion 40mg/ml [AVENTIS]                 |
| 36552 | TAXOTERE concentrate for solution for infusion 20mg/0.5ml [AVENTIS]             |
| 44087 | TAXOTERE concentrate for solution for infusion 20mg/1ml [AVENTIS]               |
| 55077 | Temodal 100mg capsules (Merck Sharp & Dohme Ltd)                                |
| 35226 | TEMODAL capsules 20mg [SCHERING-P]                                              |
| 29700 | TEMODAL capsules 250mg [SCHERING-P]                                             |
| 33803 | TEMODAL capsules 5mg [SCHERING-P]                                               |
| 21249 | temozolomide capsules 100mg                                                     |
| 42372 | temozolomide capsules 140mg                                                     |
| 32490 | temozolomide capsules 20mg                                                      |
| 21250 | temozolomide capsules 250mg                                                     |
| 27922 | temozolomide capsules 5mg                                                       |
| 62880 | Teriflunomide 14mg tablets                                                      |
| 26332 | thiotepa 15 mg inj                                                              |
| 33385 | thiotepa powder for solution for injection 15mg                                 |
| 42696 | thiotepa powder for solution for injection 15mg                                 |
| 20094 | tioguanine tablets 40mg                                                         |
| 62873 | Tocilizumab 162mg/0.9ml solution for injection pre-filled syringes              |
| 62957 | Tocilizumab 400mg/20ml solution for infusion vials                              |
| 46348 | tocilizumab concentrate for solution for infusion 200mg/10ml                    |
| 41502 | tocilizumab concentrate for solution for infusion 80mg/4ml                      |
| 47396 | Topotecan 1mg capsules                                                          |
| 41960 | topotecan powder for concentrate for solution for infusion 1mg                  |
| 40453 | TORISEL concentrate for solution for infusion 30mg/1.2ml [PFIZER]               |
| 59362 | Trabectedin 1mg powder for solution for infusion vials                          |
| 62009 | Trabectedin 250microgram powder for solution for infusion vials                 |
| 31076 | Trastuzumab 150mg powder for solution for infusion vials                        |
| 24448 | treosulfan capsules 250mg                                                       |
| 23871 | TREOSULFAN capsules 250mg [FARILLON]                                            |
| 28726 | treosulfan leo                                                                  |
| 43120 | Trisenox 10mg/10ml concentrate for solution for infusion ampoules (Teva UK Ltd) |
| 38254 | TYSABRI concentrate for solution for infusion 300mg/15ml [BIOGEN]               |
| 33519 | UFTORAL capsules 224mg + 100mg [MERCK SER]                                      |

|       |                                                                           |
|-------|---------------------------------------------------------------------------|
| 33520 | uracil with tegafur capsules 224mg + 100mg                                |
| 46309 | Ustekinumab 45mg/0.5ml injection solution                                 |
| 54485 | Ustekinumab 45mg/0.5ml solution for injection pre-filled syringes         |
| 57172 | Vandetanib 100mg tablets                                                  |
| 40732 | VELCADE powder for solution for injection 3.5mg [ORTHO BIO]               |
| 58932 | Vemurafenib 240mg tablets                                                 |
| 37375 | VEPESID capsules 100mg [BRISTOL]                                          |
| 29761 | VEPESID capsules 50mg [BRISTOL]                                           |
| 32604 | vinblastine sulphate injection 10mg/10ml                                  |
| 31223 | vinblastine sulphate injection 10mg/vial                                  |
| 40649 | Vincristine 1mg/1ml solution for injection vials                          |
| 55823 | Vincristine 5mg/5ml solution for injection vials                          |
| 18914 | Vincristine sulphate 1mg injection                                        |
| 25589 | Vincristine sulphate 1mg/ml injection                                     |
| 26316 | Vincristine sulphate 2mg injection                                        |
| 40659 | Vincristine sulphate 5mg injection                                        |
| 46838 | Vinorelbine 80mg capsules                                                 |
| 32774 | vinorelbine capsules 20mg                                                 |
| 42684 | vinorelbine concentrate for solution for infusion 10mg/1ml                |
| 33171 | vinorelbine injection solution 10mg/ml                                    |
| 47240 | Vivadex 0.5mg capsules (Dexcel-Pharma Ltd)                                |
| 47239 | Vivadex 1mg capsules (Dexcel-Pharma Ltd)                                  |
| 55010 | Vivadex 5mg capsules (Dexcel-Pharma Ltd)                                  |
| 56652 | Votrient 200mg tablets (GlaxoSmithKline UK Ltd)                           |
| 33127 | XELODA tablets 150mg [ROCHE]                                              |
| 18063 | XELODA tablets 500mg [ROCHE]                                              |
| 41058 | ENBREL FOR PAEDIATRIC USE powder for solution for injection 25mg [PFIZER] |

| Medcode | Readterm                              |
|---------|---------------------------------------|
| 69387   | Ext.beam-surgery+chemotherapy         |
| 51787   | Ext.beam + chemotherapy               |
| 70290   | Radiomimetic chemotherapy             |
| 73172   | Radio-chemotherapy NOS                |
| 98882   | Radio-chemo.: I-V route               |
| 62864   | Radio-chemo.: oral route              |
| 107130  | Radio-chemo.: into cavity             |
| 40490   | Intrathecal chemotherapy              |
| 15386   | Intravenous chemotherapy              |
| 64997   | Delivery of chemotherapy for neoplasm |
| 28071   | Continuous infusion of chemotherapy   |
| 18461   | Intravenous injection of Methotrexate |

|        |                                                              |
|--------|--------------------------------------------------------------|
| 37123  | Intramuscular chemotherapy                                   |
| 17181  | Intramuscular injection of Methotrexate                      |
| 94912  | Subcutaneous injection of methotrexate                       |
| 30264  | Subcutaneous chemotherapy                                    |
| 19467  | Pre-operative chemotherapy                                   |
| 22490  | Combined pre-operative chemotherapy and radiotherapy         |
| 95424  | Delivery of chemotherapy for neoplasm NOS                    |
| 783    | Chemotherapy                                                 |
| 101693 | Cancer chemotherapy management plan                          |
| 104142 | Neoadjuvant chemotherapy                                     |
| 14887  | Oral chemotherapy                                            |
| 18675  | Post-operative chemotherapy                                  |
| 94431  | Delivery of oral chemotherapy for neoplasm NOS               |
| 107734 | Deliver simple parenteral chemother neoplas first attendance |
| 51959  | Ambulatory chemotherapy                                      |
| 28809  | Combined post-operative chemotherapy and radiotherapy        |
| 46028  | Date chemotherapy stopped                                    |
| 5019   | Cancer chemotherapy                                          |
| 35609  | [V]Convalescence after chemotherapy                          |
| 91778  | Del comp chemo neo inc prolong infusion treat first attend   |
| 51781  | [X]Other chemotherapy                                        |
| 90743  | Delivery of oral chemotherapy for neoplasm                   |
| 96310  | Other specified delivery of chemotherapy for neoplasm        |
| 31489  | [V]Chemotherapy session for neoplasm                         |
| 89452  | Procurement drugs for chemotherapy for neoplasm in bands 1-5 |
| 26149  | Chemotherapy started                                         |
| 18832  | Date chemotherapy completed                                  |
| 20381  | [V]Maintenance chemotherapy                                  |
| 48547  | High cost immunosuppressant drugs                            |
| 105256 | Immunosuppressive therapy                                    |
| 102559 | Immunosuppressant drug therapy                               |
| 103417 | High cost immunosuppressant drugs NOS                        |
| 102571 | Anti-tumour necrosis factor drug monitoring                  |

| <b>opcs</b> | <b>description</b>                                                        |
|-------------|---------------------------------------------------------------------------|
| X352        | Intravenous chemotherapy                                                  |
| X373        | Intramuscular chemotherapy                                                |
| X384        | Subcutaneous chemotherapy                                                 |
| X70         | Procurement of drugs for chemotherapy for neoplasm in Bands 1-5           |
| X701        | Procurement of drugs for chemotherapy for neoplasm for regimens in Band 1 |
| X702        | Procurement of drugs for chemotherapy for neoplasm for regimens in Band 2 |

|      |                                                                                                            |
|------|------------------------------------------------------------------------------------------------------------|
| X703 | Procurement of drugs for chemotherapy for neoplasm for regimens in Band 3                                  |
| X704 | Procurement of drugs for chemotherapy for neoplasm for regimens in Band 4                                  |
| X705 | Procurement of drugs for chemotherapy for neoplasm for regimens in Band 5                                  |
| X708 | Other specified procurement of drugs for chemotherapy for neoplasm in Bands 1-5                            |
| X709 | Unspecified procurement of drugs for chemotherapy for neoplasm in Bands 1-5                                |
| X71  | Procurement of drugs for chemotherapy for neoplasm in Bands 6-10                                           |
| X711 | Procurement of drugs for chemotherapy for neoplasm for regimens in Band 6                                  |
| X712 | Procurement of drugs for chemotherapy for neoplasm for regimens in Band 7                                  |
| X713 | Procurement of drugs for chemotherapy for neoplasm for regimens in Band 8                                  |
| X714 | Procurement of drugs for chemotherapy for neoplasm for regimens in Band 9                                  |
| X715 | Procurement of drugs for chemotherapy for neoplasm for regimens in Band 10                                 |
| X718 | Other specified procurement of drugs for chemotherapy for neoplasm in Bands 6-10                           |
| X719 | Unspecified procurement of drugs for chemotherapy for neoplasm in Bands 6-10                               |
| X72  | Delivery of chemotherapy for neoplasm                                                                      |
| X721 | Delivery of complex chemotherapy for neoplasm including prolonged infusional treatment at first attendance |
| X722 | Delivery of complex parenteral chemotherapy for neoplasm at first attendance                               |
| X723 | Delivery of simple parenteral chemotherapy for neoplasm at first attendance                                |
| X724 | Delivery of subsequent element of cycle of chemotherapy for neoplasm                                       |
| X728 | Other specified delivery of chemotherapy for neoplasm                                                      |
| X729 | Unspecified delivery of chemotherapy for neoplasm                                                          |
| X73  | Delivery of oral chemotherapy for neoplasm                                                                 |
| X731 | Delivery of exclusively oral chemotherapy for neoplasm                                                     |
| X738 | Other specified delivery of oral chemotherapy for neoplasm                                                 |
| X739 | Unspecified delivery of oral chemotherapy for neoplasm                                                     |

## Solid organ transplant

| Medcode | Readterm                                          |
|---------|---------------------------------------------------|
| 242     | Allotransplantation of heart NEC                  |
| 250     | Transplantation of heart and lung                 |
| 2124    | Transplant follow-up                              |
| 4405    | Transplantation of liver                          |
| 4438    | Other transplantation of heart                    |
| 6692    | Liver transplant failure and rejection            |
| 9026    | [V]Liver transplanted                             |
| 9384    | [V]Heart transplanted                             |
| 10394   | [V]Lung transplanted                              |
| 10461   | Transplantation of lung                           |
| 11113   | Transplanted organ rejection                      |
| 25896   | Transplanted organ complication NOS               |
| 27319   | Transplantation of liver NOS                      |
| 27679   | Heart-lung transplant failure and rejection       |
| 29831   | Transplanted organ failure                        |
| 31997   | Liver transplant with complication, without blame |
| 32025   | Orthotopic transplantation of liver               |
| 35368   | Transplantation of pancreas                       |
| 36960   | [V]Heart and lungs transplant status              |
| 38011   | Transplantation of lung NOS                       |
| 41495   | Other transplantation of heart NOS                |
| 44077   | [V]Pancreas transplanted                          |
| 44893   | Transplanted organ complication                   |
| 47484   | Heart transplant failure and rejection            |
| 47861   | Exploration of liver transplant                   |
| 53626   | Allotransplantation of heart and lung             |
| 56993   | Transplantation of whole pancreas                 |
| 59610   | Transplant immunosuppression                      |
| 61073   | Transplantation of heart and lung NOS             |
| 64438   | Heart transplant with complication, without blame |
| 67499   | Transplantation of pancreas NOS                   |
| 69194   | Replacement of previous liver transplant          |
| 69734   | Other specified other transplantation of heart    |
| 71422   | Heterotopic transplantation of liver              |
| 72939   | Xenotransplantation of heart                      |
| 73743   | Other specified transplantation of lung           |
| 89445   | Auxillary liver transplant                        |
| 93713   | Single lung transplant                            |
| 93751   | [V]Intestine transplanted                         |
| 93844   | Revision of transplantation of heart NEC          |

|        |                                           |
|--------|-------------------------------------------|
| 96129  | Excision of transplanted pancreas         |
| 96423  | [V]Transplanted organ                     |
| 96578  | Double lung transplant                    |
| 97157  | Orthotopic transplantation of liver NEC   |
| 99250  | Other specified transplantation of liver  |
| 100073 | Piggy back liver transplant               |
| 100621 | Transplantation of ileum                  |
| 101231 | Transplantation of tail of pancreas       |
| 102998 | Transplantation of thymus gland           |
| 105506 | Orthotopic transplantation of whole liver |
| 106015 | Transplantation of spleen                 |
| 107416 | Piggyback transplantation of heart        |
| 108330 | Complication of transplanted lung         |
| 109304 | Cardiothoracic transplantation            |

| icd   | icd_description                                   |
|-------|---------------------------------------------------|
| T86.2 | Heart transplant failure and rejection            |
| T86.3 | Heart-lung transplant failure and rejection       |
| T86.4 | Liver transplant failure and rejection            |
| Y83.0 | Surgical operation with transplant of whole organ |
| Z94.0 | Kidney transplant status                          |
| Z94.1 | Heart transplant status                           |
| Z94.2 | Lung transplant status                            |
| Z94.3 | Heart and lungs transplant status                 |
| Z94.4 | Liver transplant status                           |

| opcs | description                                     |
|------|-------------------------------------------------|
| B17  | Transplantation of thymus gland                 |
| B171 | Allotransplantation of thymus gland             |
| B178 | Other specified transplantation of thymus gland |
| B179 | Unspecified transplantation of thymus gland     |
| E53  | Transplantation of lung                         |
| E531 | Double lung transplant                          |
| E532 | Single lung transplant                          |
| E533 | Single lobe lung transplant                     |
| E538 | Other specified transplantation of lung         |
| E539 | Unspecified transplantation of lung             |
| G68  | Transplantation of ileum                        |
| G681 | Allotransplantation of ileum                    |
| G688 | Other specified transplantation of ileum        |



|      |                                                   |
|------|---------------------------------------------------|
| G689 | Unspecified transplantation of ileum              |
| J01  | Transplantation of liver                          |
| J011 | Orthotopic transplantation of liver NEC           |
| J012 | Heterotopic transplantation of liver              |
| J013 | Replacement of previous liver transplant          |
| J014 | Transplantation of liver cells                    |
| J015 | Orthotopic transplantation of whole liver         |
| J018 | Other specified transplantation of liver          |
| J019 | Unspecified transplantation of liver              |
| J54  | Transplantation of pancreas                       |
| J541 | Transplantation of pancreas and duodenum          |
| J542 | Transplantation of whole pancreas                 |
| J543 | Transplantation of tail of pancreas               |
| J544 | Transplantation of islet of Langerhans            |
| J545 | Renewal of transplanted pancreatic tissue         |
| J548 | Other specified transplantation of pancreas       |
| J549 | Unspecified transplantation of pancreas           |
| J553 | Excision of transplanted pancreas                 |
| J721 | Transplantation of spleen                         |
| K01  | Transplantation of heart and lung                 |
| K011 | Allotransplantation of heart and lung             |
| K012 | Revision of transplantation of heart and lung     |
| K018 | Other specified transplantation of heart and lung |
| K019 | Unspecified transplantation of heart and lung     |
| K02  | Other transplantation of heart                    |
| K021 | Allotransplantation of heart NEC                  |
| K022 | Xenotransplantation of heart                      |
| K023 | Implantation of prosthetic heart                  |
| K024 | Piggyback transplantation of heart                |
| K025 | Revision of implantation of prosthetic heart      |
| K026 | Revision of transplantation of heart NEC          |
| K028 | Other specified other transplantation of heart    |
| K029 | Unspecified other transplantation of heart        |

## Alcohol use

| Medcode | Readterm                                                  | Status  |
|---------|-----------------------------------------------------------|---------|
| 322     | Moderate drinker - 3-6u/day                               | Current |
| 385     | Drinks rarely                                             | Current |
| 669     | Nondependent alcohol abuse, unspecified                   | Current |
| 749     | Drinks occasionally                                       | Current |
| 956     | Social drinker                                            | Current |
| 967     | Stopped drinking alcohol                                  | Ex      |
| 1399    | Alcohol problem drinking                                  | Current |
| 1476    | Delirium tremens                                          | Current |
| 1618    | Heavy drinker - 7-9u/day                                  | Current |
| 2081    | Alcoholism                                                | Current |
| 2082    | Alcohol withdrawal syndrome                               | Current |
| 2083    | Alcohol detoxification                                    | Current |
| 2084    | Alcohol dependence syndrome                               | Current |
| 2689    | Beer drinker                                              | Current |
| 2925    | Alcoholic polyneuropathy                                  | Current |
| 3216    | Acute alcoholic hepatitis                                 | Current |
| 3782    | Intoxication - alcohol                                    | Current |
| 4447    | Non-drinker alcohol                                       | Non     |
| 4500    | Korsakov's alcoholic psychosis                            | Current |
| 4506    | Alcoholic gastritis                                       | Current |
| 4743    | Alcoholic cirrhosis of liver                              | Current |
| 4915    | Alcoholic cardiomyopathy                                  | Current |
| 5611    | [X]Mental and behavioural disorders due to use of alcohol | Current |
| 5740    | Acute alcoholic intoxication in alcoholism                | Current |
| 5758    | [X]Chronic alcoholism                                     | Current |
| 6169    | Alcohol dependence syndrome NOS                           | Current |
| 6467    | [X]Alcoholic hallucinosis                                 | Current |
| 7123    | [V]Personal history of alcoholism                         | Ex      |
| 7545    | [V] Alcohol use                                           | Current |
| 7602    | Chronic alcoholic hepatitis                               | Current |
| 7692    | Patient advised about alcohol                             | Current |
| 7746    | Nondependent alcohol abuse                                | Current |
| 7885    | Alcoholic liver damage unspecified                        | Current |
| 7943    | Alcoholic hepatitis                                       | Current |
| 8030    | [V]Alcohol abuse counselling and surveillance             | Current |
| 8363    | Oesophageal varices in alcoholic cirrhosis of the liver   | Current |
| 8388    | [V]Alcohol rehabilitation                                 | Current |
| 8999    | Heavy drinker                                             | Current |
| 9169    | [D]Alcohol blood level excessive                          | Current |
| 9489    | Under care of community alcohol team                      | Current |

|       |                                                              |         |
|-------|--------------------------------------------------------------|---------|
| 9508  | [X]Acute alcoholic drunkenness                               | Current |
| 9849  | Referral to community alcohol team                           | Current |
| 10161 | O/E - alcoholic breath                                       | Current |
| 10691 | Alcoholic fatty liver                                        | Current |
| 11106 | Korsakov's alcoholic psychosis with peripheral neuritis      | Current |
| 11491 | Health ed. - alcohol                                         | Current |
| 11670 | [X]Korsakov's psychosis, alcohol induced                     | Current |
| 11740 | Alcohol misuse - enhanced services administration            | Current |
| 12353 | [X]Mental & behav dis due to use alcohol: psychotic disorder | Current |
| 12554 | Referral to community drug and alcohol team                  | Current |
| 12949 | Teetotaler                                                   | Non     |
| 12968 | Drinks beer and spirits                                      | Current |
| 12969 | Drinks wine                                                  | Current |
| 12970 | Non drinker alcohol                                          | Non     |
| 12971 | Spirit drinker                                               | Current |
| 12972 | Light drinker - 1-2u/day                                     | Current |
| 12974 | Nondependent alcohol abuse, episodic                         | Current |
| 12975 | Trivial drinker - <1u/day                                    | Current |
| 12976 | Suspect alcohol abuse - denied                               | Current |
| 12977 | Very heavy drinker - >9u/day                                 | Current |
| 12979 | Current non drinker                                          | Non     |
| 12980 | Light drinker                                                | Current |
| 12982 | Alcohol intake above recommended sensible limits             | Current |
| 12983 | Ex-very heavy drinker-(>9u/d)                                | Ex      |
| 12984 | Very heavy drinker                                           | Current |
| 12985 | Moderate drinker                                             | Current |
| 16225 | Alcohol withdrawal delirium                                  | Current |
| 16237 | Alcoholic psychoses                                          | Current |
| 16587 | [V]Problems related to lifestyle alcohol use                 | Current |
| 17259 | [X]Delirium tremens, alcohol induced                         | Current |
| 17330 | Alcoholic hepatic failure                                    | Current |
| 17607 | [X]Alcoholic psychosis NOS                                   | Current |
| 18156 | Alcoholics anonymous                                         | Current |
| 18636 | Wernicke-Korsakov syndrome                                   | Current |
| 18711 | Lifestyle advice regarding alcohol                           | Current |
| 19217 | Alcohol causing toxic effect                                 | Current |
| 19401 | Binge drinker                                                | Current |
| 19493 | Ex-heavy drinker - (7-9u/day)                                | Ex      |
| 19494 | Hazardous alcohol use                                        | Current |
| 19495 | Ex-moderate drinker - (3-6u/d)                               | Ex      |
| 20407 | Drunkenness - pathological                                   | Current |
| 20514 | [X]Mental and behav dis due to use alcohol: withdrawal state | Current |
| 20762 | Alcohol amnestic syndrome                                    | Current |

|       |                                                              |         |
|-------|--------------------------------------------------------------|---------|
| 21624 | Episodic acute alcoholic intoxication in alcoholism          | Current |
| 21650 | Admitted to alcohol detoxification centre                    | Current |
| 21713 | Alcoholic fibrosis and sclerosis of liver                    | Current |
| 21879 | [X]Mental and behav dis due to use of alcohol: harmful use   | Current |
| 22277 | DTs - delirium tremens                                       | Current |
| 22707 | Drinking problem scale                                       | Current |
| 22933 | Ex-trivial drinker (<1u/day)                                 | Ex      |
| 23610 | Nondependent alcohol abuse, continuous                       | Current |
| 23978 | [X]Evid of alcohol involv determind by level of intoxication | Current |
| 24064 | Continuous chronic alcoholism                                | Current |
| 24485 | Chronic alcoholism in remission                              | Ex      |
| 24735 | O/E - breath - alcohol smell                                 | Current |
| 24984 | Alcohol-induced chronic pancreatitis                         | Current |
| 25110 | Alcohol withdrawal hallucinosis                              | Current |
| 26106 | Episodic chronic alcoholism                                  | Current |
| 26323 | [X]Alcoholic dementia NOS                                    | Current |
| 26471 | Ex-light drinker - (1-2u/day)                                | Ex      |
| 26472 | Alcohol intake within recommended sensible limits            | Current |
| 27342 | Alcoholic dementia NOS                                       | Current |
| 27518 | Hangover (alcohol)                                           | Current |
| 27670 | Maternal care for (suspected) damage to fetus from alcohol   | Current |
| 28150 | Nondependent alcohol abuse NOS                               | Current |
| 28780 | [X]Alcohol addiction                                         | Current |
| 29691 | Aversion therapy - alcoholism                                | Current |
| 30162 | [X]Alcoholic paranoia                                        | Current |
| 30404 | Alcoholic paranoia                                           | Current |
| 30460 | Alcoholism counselling                                       | Current |
| 30604 | Alcohol-induced epilepsy                                     | Current |
| 30695 | Harmful alcohol use                                          | Current |
| 31443 | Chronic alcoholism                                           | Current |
| 31569 | Nondependent alcohol abuse in remission                      | Current |
| 31742 | Alcoholic myopathy                                           | Current |
| 32927 | [X]Alcohol withdrawal-induced seizure                        | Current |
| 33635 | Chronic alcoholism NOS                                       | Current |
| 33670 | Other alcoholic psychosis                                    | Current |
| 33839 | Cerebellar ataxia due to alcoholism                          | Current |
| 35330 | Alcohol consumption counselling                              | Current |
| 36296 | Acute alcoholic intoxication in alcoholism NOS               | Current |
| 36748 | Alcoholic encephalopathy                                     | Current |
| 37264 | Alcohol leaflet given                                        | Current |
| 37691 | [X]Chronic alcoholic brain syndrome                          | Current |
| 37946 | Chronic alcoholic brain syndrome                             | Current |
| 38061 | Alcohol induced hallucinations                               | Current |

|       |                                                              |         |
|-------|--------------------------------------------------------------|---------|
| 39327 | [X]Mental and behav dis due to use alcohol: dependence syndr | Current |
| 39799 | [X]Mental and behav dis due to use alcohol: amnesic syndrome | Current |
| 40530 | Acute alcoholic intoxication, unspecified, in alcoholism     | Current |
| 41920 | Alcohol amnesic syndrome NOS                                 | Current |
| 41983 | Alcohol detoxification                                       | Current |
| 43193 | Unspecified chronic alcoholism                               | Current |
| 44299 | [X]Mental & behav dis due to use alcohol: acute intoxication | Current |
| 44783 | Pain in lymph nodes after alcohol consumption                | Current |
| 45169 | [X]Men & behav dis due to use alcohol: oth men & behav dis   | Current |
| 46677 | Alcohol withdrawal regime                                    | Current |
| 46848 | DPS - Drinking problem scale                                 | Current |
| 47123 | Alcohol counselling by other agencies                        | Current |
| 47555 | Cerebral degeneration due to alcoholism                      | Current |
| 54209 | Advice to change alcohol intake                              | Current |
| 54505 | Other alcoholic dementia                                     | Current |
| 56410 | Delivery of rehabilitation for alcohol addiction             | Current |
| 56947 | Continuous acute alcoholic intoxication in alcoholism        | Current |
| 57714 | Alcohol dependence with acute alcoholic intoxication         | Current |
| 57939 | Pathological alcohol intoxication                            | Current |
| 59574 | Acute alcoholic intoxication in remission, in alcoholism     | Current |
| 61383 | Planned reduction of alcohol consumption                     | Current |
| 63529 | Alcohol misuse - enhanced service completed                  | Current |
| 64389 | [X]Ment & behav dis due use alcohol: unsp ment & behav dis   | Current |
| 64409 | Self-monitoring of alcohol intake                            | Current |
| 65754 | Alcohol-induced pseudo-Cushing's syndrome                    | Current |
| 65932 | [X]Alcoholic jealousy                                        | Current |
| 67651 | Alcoholic psychosis NOS                                      | Current |
| 68111 | Other alcoholic psychosis NOS                                | Current |
| 84218 | Disqualified from driving due to excess alcohol              | Current |
| 94553 | Referral to specialist alcohol treatment service             | Current |
| 94670 | Alcohol misuse                                               | Current |
| 95181 | Alcohol reduction programme                                  | Current |
| 95650 | Advice to change drink intake                                | Current |
| 96054 | Extended intervention for excessive alcohol consumptn complt | Current |
| 96993 | Referral to alcohol brief intervention service               | Current |
| 97163 | Advice to change alcoholic drink intake                      | Current |
| 97261 | Brief intervention for excessive alcohol consumptn declined  | Current |
| 97309 | Advised to contact primary care alcohol worker               | Current |
| 97680 | Declined referral to specialist alcohol treatment service    | Current |
| 12271 | Drunkenness NOS                                              | Current |
| 8430  | H/O: alcoholism                                              | Ex      |
| 17777 | Inebriety NOS                                                | Current |
| 99877 | Feels should cut down drinking                               | Current |

|        |                                          |         |
|--------|------------------------------------------|---------|
| 101718 | Drinks in morning to get rid of hangover | Current |
| 102448 | Higher risk drinking                     | Current |
| 102665 | Increasing risk drinking                 | Current |
| 104611 | Alcohol-induced acute pancreatitis       | Current |
| 12442  | Alcohol disorder monitoring              | Current |
| 32964  | Alcohol abuse monitoring                 | Current |

| Prodcode | Product name                                                         | Status  |
|----------|----------------------------------------------------------------------|---------|
| 2598     | Acamprosate 333mg gastro-resistant tablets                           | Current |
| 871      | Disulfiram 200mg tablets                                             | Current |
| 56720    | Nalmefene 18mg tablets                                               | Current |
| 6759     | Campral EC 333mg tablets (Merck Serono Ltd)                          | Current |
| 60240    | Disulfiram 500mg tablets                                             | Current |
| 2269     | Antabuse 200mg tablets (Actavis UK Ltd)                              | Current |
| 57225    | Selincro 18mg tablets (Lundbeck Ltd)                                 | Current |
| 60514    | Esperal 500mg tablets (IDIS)                                         | Current |
| 5628     | Campral ec 333mg Gastro-resistant tablet (Lipha Pharmaceuticals Ltd) | Current |

| icd   | icd_description                                              | alcstatus |
|-------|--------------------------------------------------------------|-----------|
| E24.4 | Alcohol-induced pseudo-Cushing's syndrome                    | Current   |
| F10   | Mental and behavioural disorders due to use of alcohol       | Current   |
| F10.0 | Mental & behav dis due to use of alcohol: acute intoxication | Current   |
| F10.1 | Mental and behav dis due to use of alcohol: harmful use      | Current   |
| F10.2 | Mental and behav dis due to use of alcohol: dependence synd  | Current   |
| F10.3 | Mental and behav dis due to use of alcohol: withdrawal state | Current   |
| F10.4 | Men & behav dis due alcohol: withdrawl state with delirium   | Current   |
| F10.5 | Mental & behav dis due to use of alcohol: psychotic disorder | Current   |
| F10.6 | Mental and behav dis due to use of alcohol: amnesic syndrome | Current   |
| F10.7 | Men & behav dis due use alc: resid & late-onset psychot dis  | Current   |
| F10.8 | Men & behav dis due to use of alcohol: oth men & behav dis   | Current   |
| F10.9 | Ment & behav dis due use alcohol: unsp ment & behav dis      | Current   |
| G31.2 | Degeneration of nervous system due to alcohol                | Current   |
| G62.1 | Alcoholic polyneuropathy                                     | Current   |
| G72.1 | Alcoholic myopathy                                           | Current   |
| I42.6 | Alcoholic cardiomyopathy                                     | Current   |
| K29.2 | Alcoholic gastritis                                          | Current   |
| K70   | Alcoholic liver disease                                      | Current   |
| K70.0 | Alcoholic fatty liver                                        | Current   |
| K70.1 | Alcoholic hepatitis                                          | Current   |
| K70.2 | Alcoholic fibrosis and sclerosis of liver                    | Current   |

|       |                                              |         |
|-------|----------------------------------------------|---------|
| K70.3 | Alcoholic cirrhosis of liver                 | Current |
| K70.4 | Alcoholic hepatic failure                    | Current |
| K70.9 | Alcoholic liver disease, unspecified         | Current |
| K86.0 | Alcohol-induced chronic pancreatitis         | Current |
| T51.0 | Toxic effect of ethanol                      | Current |
| Y90.1 | Blood alcohol level of 20-39 mg/100 ml       | Current |
| Y90.2 | Blood alcohol level of 40-59 mg/100 ml       | Current |
| Y90.3 | Blood alcohol level of 60-79 mg/100 ml       | Current |
| Y90.4 | Blood alcohol level of 80-99 mg/100 ml       | Current |
| Y90.5 | Blood alcohol level of 100-119 mg/100 ml     | Current |
| Y90.6 | Blood alcohol level of 120-199 mg/100 ml     | Current |
| Y90.7 | Blood alcohol level of 200-239 mg/100 ml     | Current |
| Y90.8 | Blood alcohol level of 240 mg/100 ml or more | Current |
| Y91.0 | Mild alcohol intoxication                    | Current |
| Y91.1 | Moderate alcohol intoxication                | Current |
| Y91.2 | Severe alcohol intoxication                  | Current |
| Y91.3 | Very severe alcohol intoxication             | Current |
| Z50.2 | Alcohol rehabilitation                       | Current |
| Z71.4 | Alcohol abuse counselling and surveillance   | Current |
| Z72.1 | Alcohol use                                  | Current |
| R78.0 | Finding of alcohol in blood                  | Current |

## Smoking

| Medcode | Readterm                                      | Status               |
|---------|-----------------------------------------------|----------------------|
| 33      | Never smoked tobacco                          | Non-smoker           |
| 54      | Tobacco consumption                           | Current smoker       |
| 60      | Current non-smoker                            | Non-smoker           |
| 90      | Ex smoker                                     | Ex-smoker            |
| 93      | Cigarette smoker                              | Current smoker       |
| 776     | Stopped smoking                               | Ex-smoker            |
| 1822    | Very heavy smoker - 40+cigs/d                 | Current smoker       |
| 1823    | Smoker                                        | Current smoker       |
| 1878    | Moderate smoker - 10-19 cigs/d                | Current smoker       |
| 2111    | Health ed. - smoking                          | Current smoker       |
| 3568    | Heavy smoker - 20-39 cigs/day                 | Current smoker       |
| 9045    | Advice on smoking                             | Current smoker       |
| 10184   | Pregnancy smoking advice                      | Current smoker       |
| 10211   | Smoking cessation milestones                  | Ex-smoker            |
| 10558   | Current smoker                                | Current smoker       |
| 10898   | Smoking free weeks                            | Ex-smoker            |
| 11527   | DNA - Did not attend smoking cessation clinic | Current smoker       |
| 11713   | Pack years                                    | Current or ex-smoker |
| 11788   | Non-smoker                                    | Non-smoker           |
| 12878   | Date ceased smoking                           | Ex-smoker            |
| 12941   | Occasional smoker                             | Current smoker       |
| 12942   | Smoker - amount smoked                        | Current smoker       |
| 12943   | Cigar smoker                                  | Current smoker       |
| 12944   | Light smoker - 1-9 cigs/day                   | Current smoker       |
| 12945   | Rolls own cigarettes                          | Current smoker       |
| 12946   | Ex-smoker - amount unknown                    | Ex-smoker            |
| 12947   | Pipe smoker                                   | Current smoker       |
| 12951   | Smoking restarted                             | Current smoker       |
| 12952   | Smoking started                               | Current smoker       |
| 12954   | [V]Tobacco use                                | Current smoker       |
| 12955   | Ex-moderate smoker (10-19/day)                | Ex-smoker            |
| 12956   | Ex-heavy smoker (20-39/day)                   | Ex-smoker            |
| 12957   | Ex-light smoker (1-9/day)                     | Ex-smoker            |
| 12958   | Trivial smoker - < 1 cig/day                  | Current smoker       |
| 12959   | Ex-very heavy smoker (40+/day)                | Ex-smoker            |
| 12960   | Tobacco consumption NOS                       | Current smoker       |
| 12961   | Ex-trivial smoker (<1/day)                    | Ex-smoker            |
| 12963   | Cigar consumption                             | Current smoker       |
| 12964   | Keeps trying to stop smoking                  | Current smoker       |
| 12965   | Cigarette consumption                         | Current smoker       |



|       |                                                              |                      |
|-------|--------------------------------------------------------------|----------------------|
| 12966 | Smoking reduced                                              | Current smoker       |
| 12967 | Pipe tobacco consumption                                     | Current smoker       |
| 13351 | Passive smoker                                               | Non-smoker           |
| 18926 | Lifestyle advice regarding smoking                           | Current smoker       |
| 19485 | Stop smoking monitor.chck done                               | Current or ex-smoker |
| 19488 | Ex cigar smoker                                              | Ex-smoker            |
| 21637 | Stop smoking monitor admin.NOS                               | Current or ex-smoker |
| 24529 | Nicotine replacement therapy refused                         | Current smoker       |
| 25106 | Nicotine replacement therapy provided free                   | Current or ex-smoker |
| 26470 | Ex pipe smoker                                               | Ex-smoker            |
| 28834 | Anti-smoking monitoring admin.                               | Current or ex-smoker |
| 30423 | Thinking about stopping smoking                              | Current smoker       |
| 30762 | Not interested in stopping smoking                           | Current smoker       |
| 31114 | Ready to stop smoking                                        | Current smoker       |
| 32083 | Stop smoking clinic admin.                                   | Current or ex-smoker |
| 32687 | Tobacco dependence                                           | Current smoker       |
| 34126 | Negotiated date for cessation of smoking                     | Current smoker       |
| 35055 | [V]Tobacco abuse counselling                                 | Current smoker       |
| 38112 | Smoking cessation programme start date                       | Current smoker       |
| 40417 | Stop smoking monitor default                                 | Current or ex-smoker |
| 40418 | Refuses stop smoking monitor                                 | Current smoker       |
| 41979 | Smoking restarted                                            | Current smoker       |
| 42288 | Pack years                                                   | Current or ex-smoker |
| 43433 | Toxic effect of tobacco and nicotine                         | Current smoker       |
| 46300 | Cigarette pack-years                                         | Current or ex-smoker |
| 46321 | Reason for restarting smoking                                | Current smoker       |
| 47273 | Motives for smoking scale                                    | Current smoker       |
| 49418 | RFS - Reasons for smoking scale                              | Current smoker       |
| 52503 | No smokers in the household                                  | Non-smoker           |
| 56144 | [X]Mental and behav dis due to use of tobacco: harmful use   | Current smoker       |
| 57639 | Bupropion refused                                            | Current smoker       |
| 59866 | Reasons for smoking scale                                    | Current smoker       |
| 60720 | Stop smoking monitor 2nd lettr                               | Current or ex-smoker |
| 61905 | [X]Mental and behavioural disorder due to use of tobacco     | Current smoker       |
| 62686 | Minutes from waking to first tobacco consumption             | Current smoker       |
| 63016 | [X]Bupropion causing adverse effects in therapeutic use      | Current or ex-smoker |
| 63299 | FTND - Fagerstrom test for nicotine dependence               | Current smoker       |
| 63666 | Fagerstrom test for nicotine dependence                      | Current smoker       |
| 63901 | Stop smoking monitoring delete                               | Current or ex-smoker |
| 66387 | Stop smoking monitor 3rd lettr                               | Current or ex-smoker |
| 67178 | Nicotine replacement therapy provided by community pharmacis | Current or ex-smoker |
| 68658 | Tobacco dependence NOS                                       | Current smoker       |
| 70746 | Tobacco dependence, continuous                               | Current smoker       |

|        |                                                              |                      |
|--------|--------------------------------------------------------------|----------------------|
| 72706  | Tobacco dependence in remission                              | Ex-smoker            |
| 90522  | Smoking cessation therapy NOS                                | Current or ex-smoker |
| 91513  | Occasions for smoking scale                                  | Current smoker       |
| 91708  | Other specified smoking cessation therapy                    | Current or ex-smoker |
| 95610  | Tobacco dependence, unspecified                              | Current smoker       |
| 96992  | Smoking cessation - enhanced services administration         | Current or ex-smoker |
| 97210  | Ex-cigarette smoker                                          | Ex-smoker            |
| 97643  | Fagerstrom test for nicotine dependence                      | Current smoker       |
| 98177  | Non-smoker annual review - enhanced services administration  | Non-smoker           |
| 98283  | COPD structured smoking assessment declined - enh serv admin | Current or ex-smoker |
| 98284  | Refer COPD structured smoking assessment - enhanc serv admin | Current or ex-smoker |
| 98347  | Current smoker annual review - enhanced services admin       | Current smoker       |
| 98447  | Ex-smoker annual review - enhanced services administration   | Ex-smoker            |
| 98493  | Smoking cessatn monitor template complet - enhanc serv admin | Current or ex-smoker |
| 99838  | Recently stopped smoking                                     | Ex-smoker            |
| 100099 | Smoking cessation advice declined                            | Current smoker       |
| 100495 | Ex roll-up cigarette smoker                                  | Ex-smoker            |
| 100963 | Ex-smoker annual review                                      | Ex-smoker            |
| 101210 | Consent given for smoking cessation data sharing             | Current or ex-smoker |
| 101325 | Declin cons follow-up evaluation after smoking cess interven | Current or ex-smoker |
| 101338 | Failed attempt to stop smoking                               | Current smoker       |
| 101385 | Consent given for follow-up by smoking cessation team        | Current or ex-smoker |
| 101634 | Consent given follow-up after smoking cessation intervention | Current or ex-smoker |
| 101851 | Declined consent for follow-up by smoking cessation team     | Current or ex-smoker |
| 101854 | Declined consent for smoking cessation data sharing          | Current or ex-smoker |
| 101878 | Non-smoker annual review                                     | Non-smoker           |
| 102361 | Referral for smoking cessation service offered               | Current smoker       |
| 102951 | Lost to smoking cessation follow-up                          | Current or ex-smoker |
| 103760 | COPD structured smoking assessment declined                  | Current or ex-smoker |
| 104310 | Current smoker annual review                                 | Current smoker       |
| 108835 | Tobacco dependence, episodic                                 | Current smoker       |
| 107792 | [X]Mental and behav dis due to use tobacco: dependence syndr | Current smoker       |
| 103208 | Smoking status at 12 weeks                                   | Current or ex-smoker |
| 108966 | Smoking cessation ESA monitoring template completed          | Current or ex-smoker |
| 16717  | Smokers' cough                                               | Current or ex-smoker |
| 10742  | Referral to stop-smoking clinic                              | Current smoker       |
| 11356  | Seen by smoking cessation advisor                            | Current smoker       |
| 7622   | Smoking cessation advice                                     | Current smoker       |
| 72700  | [V]Personal history of tobacco abuse                         | Ex-smoker            |
| 63717  | Bupropion contraindicated                                    | Current or ex-smoker |
| 66409  | Nicotine replacement therapy contraindicated                 | Current or ex-smoker |
| 104086 | Stop smoking invitation first SMS text message               | Current or ex-smoker |
| 104185 | Smoking cessation drug therapy declined                      | Current or ex-smoker |

|        |                                                              |                      |
|--------|--------------------------------------------------------------|----------------------|
| 104230 | Smoking cessation programme declined                         | Current or ex-smoker |
| 105572 | Stop smoking invitation short message service text message   | Current or ex-smoker |
| 106359 | Referral to smoking cessation service                        | Current or ex-smoker |
| 106384 | Stop smoking invitation second SMS text message              | Current or ex-smoker |
| 106385 | Stop smoking invitation third SMS text message               | Current or ex-smoker |
| 106391 | Referral to smoking cessation service declined               | Current or ex-smoker |
| 107504 | MFS - Motives for smoking scale                              | Current or ex-smoker |
| 34127  | Smoking status at 4 weeks                                    | Current or ex-smoker |
| 34374  | Smoking status between 4 and 52 weeks                        | Current or ex-smoker |
| 41405  | Smoking status at 52 weeks                                   | Current or ex-smoker |
| 105710 | Smoking cessation 12 week follow-up                          | Current or ex-smoker |
| 103400 | Referred for COPD structured smoking assessment              | Current or ex-smoker |
| 6359   | Nicotine withdrawal                                          | Current or ex-smoker |
| 7130   | Stop smoking monitoring admin.                               | Current or ex-smoker |
| 9833   | Nicotine replacement therapy                                 | Current or ex-smoker |
| 12240  | Trying to give up smoking                                    | Current or ex-smoker |
| 12953  | Attends stop smoking monitor.                                | Current or ex-smoker |
| 18573  | Referral to smoking cessation advisor                        | Current or ex-smoker |
| 32572  | Over the counter nicotine replacement therapy                | Current or ex-smoker |
| 41042  | Smoking cessation advice provided by community pharmacist    | Current or ex-smoker |
| 42722  | Stop smoking monitor 1st lettr                               | Current or ex-smoker |
| 53101  | Stop smoking monitor verb.inv.                               | Current or ex-smoker |
| 58597  | Stop smoking monitor phone inv                               | Current or ex-smoker |
| 74907  | Smoking cessation therapy                                    | Current or ex-smoker |
| 81440  | Nicotine replacement therapy using nicotine patches          | Current or ex-smoker |
| 85247  | Nicotine replacement therapy using nicotine inhalator        | Current or ex-smoker |
| 85975  | Nicotine replacement therapy using nicotine gum              | Current or ex-smoker |
| 89464  | Nicotine replacement therapy using nicotine lozenges         | Current or ex-smoker |
| 94958  | Smoking cessation drug therapy                               | Current or ex-smoker |
| 98137  | Brief intervention for smoking cessation                     | Current or ex-smoker |
| 98154  | Referral to NHS stop smoking service                         | Current or ex-smoker |
| 98245  | Stop smoking face to face follow-up                          | Current or ex-smoker |
| 101519 | [X]Mental and behav dis due to use tobacco: withdrawal state | Current or ex-smoker |
| 101764 | Practice based smoking cessation programme start date        | Current or ex-smoker |

| Prodcodes | Product name                                                                | Status               |
|-----------|-----------------------------------------------------------------------------|----------------------|
| 1703      | Nicorette 15mg Transdermal patch (Pharmacia Ltd)                            | Current or ex-smoker |
| 42221     | Nicotine 4mg lozenges sugar free (Teva UK Ltd)                              | Current or ex-smoker |
| 38958     | Nicotinell 1mg lozenges (Novartis Consumer Health UK Ltd)                   | Current or ex-smoker |
| 41765     | Nicotinell Mint 2mg medicated chewing gum (Novartis Consumer Health UK Ltd) | Current or ex-smoker |
| 5502      | Nicotine 15mg/16hours transdermal patches                                   | Current or ex-smoker |

|       |                                                                                        |                      |
|-------|----------------------------------------------------------------------------------------|----------------------|
| 39123 | Nicotine 25mg/16hours transdermal patches                                              | Current or ex-smoker |
| 58034 | Nicotine 2.5mg orodispersible films sugar free                                         | Current or ex-smoker |
| 48620 | Boots NicAssist 10mg Inhalator (The Boots Company Plc)                                 | Current or ex-smoker |
| 41809 | Nicorette Mint 4mg medicated chewing gum (McNeil Products Ltd)                         | Current or ex-smoker |
| 5320  | Nicorette 10mg Inhalator (McNeil Products Ltd)                                         | Current or ex-smoker |
| 5606  | Nicotinell tts 20 sq cm Transdermal patch (Novartis Consumer Health UK Ltd)            | Current or ex-smoker |
| 41040 | Nicorette lemon 2mg microtab (McNeil Products Ltd)                                     | Current or ex-smoker |
| 54574 | Boots NicAssist Minty Fresh 4mg medicated chewing gum (The Boots Company Plc)          | Current or ex-smoker |
| 5784  | Nicotine 4mg lozenges sugar free                                                       | Current or ex-smoker |
| 42016 | Nicorette Mint 2mg medicated chewing gum (McNeil Products Ltd)                         | Current or ex-smoker |
| 57731 | NicoBloc liquid (NicoBloc Plc)                                                         | Current or ex-smoker |
| 42047 | Nicotinell Liquorice 4mg medicated chewing gum (Novartis Consumer Health UK Ltd)       | Current or ex-smoker |
| 27411 | Champix 1mg tablets (Pfizer Ltd)                                                       | Current or ex-smoker |
| 5457  | Nicotine 5mg/16hours transdermal patches                                               | Current or ex-smoker |
| 4717  | Niquitin 14mg Transdermal patch (GlaxoSmithKline Consumer Healthcare)                  | Current or ex-smoker |
| 41860 | Nicotine bitartrate 2mg Sublingual tablet                                              | Current or ex-smoker |
| 61777 | Nicotinell Support Icemint 4mg medicated chewing gum (Novartis Consumer Health UK Ltd) | Current or ex-smoker |
| 62246 | Nicotinell Support Icemint 2mg medicated chewing gum (Novartis Consumer Health UK Ltd) | Current or ex-smoker |
| 41376 | Nicorette 15mg patches (McNeil Products Ltd)                                           | Current or ex-smoker |
| 55417 | Zyban 150mg modified-release tablets (Lexon (UK) Ltd)                                  | Current or ex-smoker |
| 27414 | Varenicline 1mg tablets                                                                | Current or ex-smoker |
| 2876  | Nicorette Citrus 2mg medicated chewing gum (Pfizer Ltd)                                | Current or ex-smoker |
| 1248  | Nicorette 10mg/ml Nasal spray (Pharmacia Ltd)                                          | Current or ex-smoker |
| 35035 | Champix 0.5mg tablets (Pfizer Ltd)                                                     | Current or ex-smoker |
| 5515  | Nicotine 1mg Lozenge                                                                   | Current or ex-smoker |
| 25510 | Nicotine 2mg mint flavour chewing-gum                                                  | Current or ex-smoker |
| 54102 | NiQuitin Pre-Quit Clear 21mg patches (GlaxoSmithKline Consumer Healthcare)             | Current or ex-smoker |
| 4704  | Niquitin 7mg Transdermal patch (GlaxoSmithKline Consumer Healthcare)                   | Current or ex-smoker |
| 41425 | Nicorette Freshmint 4mg medicated chewing gum (McNeil Products Ltd)                    | Current or ex-smoker |
| 27412 | Varenicline 1mg tablets and Varenicline 500microgram tablets                           | Current or ex-smoker |
| 46717 | Nicotine 15mg inhalation cartridges with device                                        | Current or ex-smoker |
| 40617 | Nicotinell TTS 20 patches (Novartis Consumer Health UK Ltd)                            | Current or ex-smoker |
| 41778 | Nicorette Freshfruit 4mg medicated chewing gum (McNeil Products Ltd)                   | Current or ex-smoker |
| 3818  | Nicotinell tts 30 sq cm Transdermal patch (Novartis Consumer Health UK Ltd)            | Current or ex-smoker |
| 27410 | Champix titration pack (Pfizer Ltd)                                                    | Current or ex-smoker |
| 58675 | Boots NicAssist 5mg patches (The Boots Company Plc)                                    | Current or ex-smoker |
| 25516 | Nicotine 4mg mint flavour chewing-gum                                                  | Current or ex-smoker |
| 37646 | Nicotine 1.5mg lozenges sugar free                                                     | Current or ex-smoker |
| 41879 | Nicotinell Liquorice 2mg medicated chewing gum (Novartis Consumer Health UK Ltd)       | Current or ex-smoker |

|       |                                                                                |                      |
|-------|--------------------------------------------------------------------------------|----------------------|
| 5946  | Nicotinell 2mg Medicated chewing-gum (Novartis Consumer Health UK Ltd)         | Current or ex-smoker |
| 60236 | Boots NicAssist 10mg patches (The Boots Company Plc)                           | Current or ex-smoker |
| 49204 | Champix titration pack (Mawdsley-Brooks & Company Ltd)                         | Current or ex-smoker |
| 3404  | Niquitin 21mg Transdermal patch (GlaxoSmithKline Consumer Healthcare)          | Current or ex-smoker |
| 41372 | NiQuitin Clear 21mg patches (GlaxoSmithKline Consumer Healthcare)              | Current or ex-smoker |
| 46592 | Nicorette 15mg Inhalator (McNeil Products Ltd)                                 | Current or ex-smoker |
| 45504 | Nicotine 1mg/dose oromucosal spray sugar free                                  | Current or ex-smoker |
| 10623 | Nicabate 7mg Transdermal patch (Marion Merrell Dow Ltd)                        | Current or ex-smoker |
| 41507 | NiQuitin Clear 7mg patches (GlaxoSmithKline Consumer Healthcare)               | Current or ex-smoker |
| 42048 | Nicotine bitartrate 1mg lozenges sugar free                                    | Current or ex-smoker |
| 27311 | Niconil 22mg/24 hr Transdermal patch (Elan Pharma)                             | Current or ex-smoker |
| 6448  | Nicotine 21mg/24hours transdermal patches                                      | Current or ex-smoker |
| 41426 | NiQuitin 7mg patches (GlaxoSmithKline Consumer Healthcare)                     | Current or ex-smoker |
| 41801 | Nicorette Freshmint 2mg medicated chewing gum (McNeil Products Ltd)            | Current or ex-smoker |
| 49901 | Champix 1mg tablets (Waymade Healthcare Plc)                                   | Current or ex-smoker |
| 5440  | Nicorette 10mg Transdermal patch (Pharmacia Ltd)                               | Current or ex-smoker |
| 4166  | Nicorette Citrus 4mg medicated chewing gum (Pfizer Ltd)                        | Current or ex-smoker |
| 40683 | Nicotinell TTS 10 patches (Novartis Consumer Health UK Ltd)                    | Current or ex-smoker |
| 49607 | Boots NicAssist 15mg patches (The Boots Company Plc)                           | Current or ex-smoker |
| 6018  | Nicorette 5mg Transdermal patch (Pharmacia Ltd)                                | Current or ex-smoker |
| 40865 | NiQuitin Minis Mint 4mg lozenges (GlaxoSmithKline Consumer Healthcare)         | Current or ex-smoker |
| 33392 | Nicotine 22mg/24 hr Transdermal patch                                          | Current or ex-smoker |
| 41909 | Nicotinell Mint 4mg medicated chewing gum (Novartis Consumer Health UK Ltd)    | Current or ex-smoker |
| 5877  | Nicorette 2mg microtab (Pharmacia Ltd)                                         | Current or ex-smoker |
| 41505 | NiQuitin Clear 14mg patches (GlaxoSmithKline Consumer Healthcare)              | Current or ex-smoker |
| 45429 | Nicorette QuickMist 1mg/dose mouthspray (McNeil Products Ltd)                  | Current or ex-smoker |
| 41485 | NiQuitin 14mg patches (GlaxoSmithKline Consumer Healthcare)                    | Current or ex-smoker |
| 49319 | Nicorette Cools 4mg lozenges (McNeil Products Ltd)                             | Current or ex-smoker |
| 31939 | Nicorette 4mg mint flavour chewing-gum (Pharmacia Ltd)                         | Current or ex-smoker |
| 56552 | Boots NicAssist Minty Fresh 2mg medicated chewing gum (The Boots Company Plc)  | Current or ex-smoker |
| 5944  | Nicotine 10mg inhalation cartridges with device                                | Current or ex-smoker |
| 41368 | NiQuitin 21mg patches (GlaxoSmithKline Consumer Healthcare)                    | Current or ex-smoker |
| 50541 | Champix titration pack (Sigma Pharmaceuticals Plc)                             | Current or ex-smoker |
| 39572 | Nicorette invis 10mg/16hours patches (McNeil Products Ltd)                     | Current or ex-smoker |
| 44106 | NiQuitin Minis Cherry 1.5mg lozenges (GlaxoSmithKline Consumer Healthcare)     | Current or ex-smoker |
| 6698  | Nicotinell 2mg lozenges (Novartis Consumer Health UK Ltd)                      | Current or ex-smoker |
| 41881 | Nicotinell Classic 2mg medicated chewing gum (Novartis Consumer Health UK Ltd) | Current or ex-smoker |
| 9591  | Nicotine 14mg/24hours transdermal patches                                      | Current or ex-smoker |
| 41864 | Nicorette Freshfruit 2mg medicated chewing gum (McNeil Products Ltd)           | Current or ex-smoker |
| 39166 | Nicorette invis 15mg/16hours patches (McNeil Products Ltd)                     | Current or ex-smoker |

|       |                                                                                   |                      |
|-------|-----------------------------------------------------------------------------------|----------------------|
| 29680 | Niconil 11mg/24 hr Transdermal patch (Elan Pharma)                                | Current or ex-smoker |
| 5758  | Nicotine 4mg medicated chewing gum sugar free                                     | Current or ex-smoker |
| 41802 | Nicorette 5mg patches (McNeil Products Ltd)                                       | Current or ex-smoker |
| 36457 | Nicopatch 21mg/24hours transdermal patches (Pierre Fabre Ltd)                     | Current or ex-smoker |
| 6630  | NiQuitin Mint 2mg lozenges (GlaxoSmithKline Consumer Healthcare)                  | Current or ex-smoker |
| 10527 | Nicabate 14mg Transdermal patch (Marion Merrell Dow Ltd)                          | Current or ex-smoker |
| 40730 | NiQuitin Minis Mint 1.5mg lozenges (GlaxoSmithKline Consumer Healthcare)          | Current or ex-smoker |
| 57829 | NiQuitin Strips Mint 2.5mg oral films (GlaxoSmithKline Consumer Healthcare)       | Current or ex-smoker |
| 36618 | Nicopatch 7mg/24hours transdermal patches (Pierre Fabre Ltd)                      | Current or ex-smoker |
| 5700  | NiQuitin 2mg lozenges original menthol mint (GlaxoSmithKline Consumer Healthcare) | Current or ex-smoker |
| 57417 | Nicorette 5mg patches (Waymade Healthcare Plc)                                    | Current or ex-smoker |
| 45603 | Nicorette Freshmint 2mg lozenges (McNeil Products Ltd)                            | Current or ex-smoker |
| 41753 | Nicorette Original 4mg medicated chewing gum (McNeil Products Ltd)                | Current or ex-smoker |
| 6642  | NiQuitin Mint 4mg medicated chewing gum (GlaxoSmithKline Consumer Healthcare)     | Current or ex-smoker |
| 11718 | Nicotine 2mg sublingual tablets sugar free                                        | Current or ex-smoker |
| 13048 | Nicotinell 4mg Medicated chewing-gum (Novartis Consumer Health UK Ltd)            | Current or ex-smoker |
| 36635 | Nicopatch 14mg/24hours transdermal patches (Pierre Fabre Ltd)                     | Current or ex-smoker |
| 49305 | Nicorette Cools 2mg lozenges (McNeil Products Ltd)                                | Current or ex-smoker |
| 5531  | Nicotinell 1mg Lozenge (Novartis Consumer Health UK Ltd)                          | Current or ex-smoker |
| 6593  | NiQuitin Mint 4mg lozenges (GlaxoSmithKline Consumer Healthcare)                  | Current or ex-smoker |
| 39046 | Nicorette invisio 25mg/16hours patches (McNeil Products Ltd)                      | Current or ex-smoker |
| 41474 | Nicorette 10mg patches (McNeil Products Ltd)                                      | Current or ex-smoker |
| 467   | Zyban 150mg modified-release tablets (GlaxoSmithKline UK Ltd)                     | Current or ex-smoker |
| 41808 | Nicotinell Fruit 4mg medicated chewing gum (Novartis Consumer Health UK Ltd)      | Current or ex-smoker |
| 50487 | NiQuitin Clear 14mg patches (Waymade Healthcare Plc)                              | Current or ex-smoker |
| 37716 | Nicopass 1.5mg Lozenge (Wockhardt UK Ltd)                                         | Current or ex-smoker |
| 5659  | NiQuitin 4mg lozenges original menthol mint (GlaxoSmithKline Consumer Healthcare) | Current or ex-smoker |
| 41356 | Nicorette Microtab 2mg sublingual tablets (McNeil Products Ltd)                   | Current or ex-smoker |
| 5115  | Bupropion 150mg modified-release tablets                                          | Current or ex-smoker |
| 7303  | Nicotinell tts 10 sq cm Transdermal patch (Novartis Consumer Health UK Ltd)       | Current or ex-smoker |
| 41377 | Nicorette Original 2mg medicated chewing gum (McNeil Products Ltd)                | Current or ex-smoker |
| 42011 | Nicotinell Classic 4mg medicated chewing gum (Novartis Consumer Health UK Ltd)    | Current or ex-smoker |
| 7644  | Nicabate 21mg Transdermal patch (Marion Merrell Dow Ltd)                          | Current or ex-smoker |
| 46588 | Nicotinell Icemint 2mg medicated chewing gum (Novartis Consumer Health UK Ltd)    | Current or ex-smoker |
| 58410 | NiQuitin Minis Orange 1.5mg lozenges (GlaxoSmithKline Consumer Healthcare)        | Current or ex-smoker |
| 46701 | Nicotinell Icemint 4mg medicated chewing gum (Novartis Consumer Health UK Ltd)    | Current or ex-smoker |
| 41931 | Nicotinell Fruit 2mg medicated chewing gum (Novartis Consumer Health UK Ltd)      | Current or ex-smoker |

|       |                                                                               |                      |
|-------|-------------------------------------------------------------------------------|----------------------|
| 8571  | Nicotine 500micrograms/dose nasal spray                                       | Current or ex-smoker |
| 49088 | NiQuitin Clear 21mg patches (Waymade Healthcare Plc)                          | Current or ex-smoker |
| 25523 | Nicorette 2mg mint flavour chewing-gum (Pharmacia Ltd)                        | Current or ex-smoker |
| 41496 | Nicorette 500micrograms/dose nasal spray (McNeil Products Ltd)                | Current or ex-smoker |
| 9806  | Nicotine 2mg lozenges sugar free                                              | Current or ex-smoker |
| 6565  | NiQuitin Mint 2mg medicated chewing gum (GlaxoSmithKline Consumer Healthcare) | Current or ex-smoker |
| 35089 | Varenicline 500microgram tablets                                              | Current or ex-smoker |
| 39521 | NiQuitin Pre-Quit Mint 4mg lozenges (GlaxoSmithKline Consumer Healthcare)     | Current or ex-smoker |
| 9804  | Nicotine 7mg/24hours transdermal patches                                      | Current or ex-smoker |
| 42286 | Nicotine bitartrate 2mg lozenges sugar free                                   | Current or ex-smoker |
| 6323  | Nicotine 2mg medicated chewing gum sugar free                                 | Current or ex-smoker |
| 40620 | Nicotinell TTS 30 patches (Novartis Consumer Health UK Ltd)                   | Current or ex-smoker |
| 55590 | Nicotine 11mg/24 hr Transdermal patch                                         | Current or ex-smoker |
| 5479  | Nicotine 10mg/16hours transdermal patches                                     | Current or ex-smoker |
| 41493 | Nicorette Icy White 4mg medicated chewing gum (McNeil Products Ltd)           | Current or ex-smoker |
| 41779 | Nicorette Icy White 2mg medicated chewing gum (McNeil Products Ltd)           | Current or ex-smoker |

| icd   | icd_description                                             | Smokstatus           |
|-------|-------------------------------------------------------------|----------------------|
| F17   | Mental and behavioural disorders due to use of tobacco      | Current smoker       |
| F17.0 | Men & behav dis due use tobacco: acute intoxication         | Current smoker       |
| F17.1 | Men & behav dis due use tobacco: harmful use                | Current smoker       |
| F17.2 | Men & behav dis due use tobacco: dependence syndrome        | Current smoker       |
| F17.3 | Men & behav dis due use tobacco: withdrawl state            | Current or ex-smoker |
| F17.4 | Men & behav dis due use tobacco: withdrawl state + delirium | Current or ex-smoker |
| F17.5 | Men & behav dis due use tobacco: psychotic disorder         | Current smoker       |
| F17.6 | Men & behav dis due use tobacco: amnesic syndrome           | Current smoker       |
| F17.7 | Men & behav dis due use tobacco: res & late-ons psych dis   | Current smoker       |
| F17.8 | Men & behav dis due use tobacco: oth men & behav dis        | Current smoker       |
| F17.9 | Men & behav dis due use tobacco: unsp men & behav dis       | Current smoker       |
| T65.2 | Toxic effect of tobacco and nicotine                        | Current smoker       |
| Z71.6 | Tobacco abuse counselling                                   | Current smoker       |
| Z72.0 | Tobacco use                                                 | Current smoker       |

## Myocardial infarction

| Medcode | Readterm                                                     |
|---------|--------------------------------------------------------------|
| 241     | Acute myocardial infarction                                  |
| 1204    | Heart attack                                                 |
| 1677    | MI - acute myocardial infarction                             |
| 1678    | Inferior myocardial infarction NOS                           |
| 2491    | Coronary thrombosis                                          |
| 3704    | Acute subendocardial infarction                              |
| 5387    | Other specified anterior myocardial infarction               |
| 7783    | ECG: myocardial infarction                                   |
| 8935    | Acute inferolateral infarction                               |
| 9507    | Acute non-Q wave infarction                                  |
| 10562   | Acute non-Q wave infarction                                  |
| 12139   | Acute anterolateral infarction                               |
| 12229   | Acute ST segment elevation myocardial infarction             |
| 13566   | Attack - heart                                               |
| 13571   | Thrombosis - coronary                                        |
| 14658   | Acute myocardial infarction NOS                              |
| 14897   | Anterior myocardial infarction NOS                           |
| 14898   | Lateral myocardial infarction NOS                            |
| 15661   | Dressler's syndrome                                          |
| 17133   | Mural thrombosis                                             |
| 17872   | Acute antero-septal infarction                               |
| 18842   | Subsequent myocardial infarction                             |
| 21854   | Left ventricular thrombosis                                  |
| 23708   | Atrial septal defect/curr comp folow acut myocardal infarct  |
| 23892   | Posterior myocardial infarction NOS                          |
| 24126   | Haemopericardium/current comp folow acut myocard infarct     |
| 26966   | ECG: S-T elevation                                           |
| 26972   | ECG:posterior/inferior infarct                               |
| 26975   | ECG: antero-septal infarct.                                  |
| 28736   | Acute atrial infarction                                      |
| 29553   | Thrombosis atrium,auric append&vent/curr comp foll acute MI  |
| 29643   | Acute inferoposterior infarction                             |
| 29758   | Acute transmural myocardial infarction of unspecif site      |
| 30330   | Acute Q-wave infarct                                         |
| 30421   | Cardiac rupture following myocardial infarction (MI)         |
| 32272   | Postoperative myocardial infarction                          |
| 32854   | Acute posterolateral myocardial infarction                   |
| 34803   | Other acute myocardial infarction                            |
| 35119   | Post infarction pericarditis                                 |
| 36423   | Certain current complication follow acute myocardial infarct |



|        |                                                              |
|--------|--------------------------------------------------------------|
| 37657  | Ventric septal defect/curr comp fol acut myocardal infarctn  |
| 38609  | Subsequent myocardial infarction of inferior wall            |
| 39449  | Coronary thrombosis not resulting in myocardial infarction   |
| 40429  | Acute anteroapical infarction                                |
| 40996  | Percut translum coronary thrombolytic therapy- streptokinase |
| 41221  | Acute septal infarction                                      |
| 41835  | Postoperative subendocardial myocardial infarction           |
| 45809  | Subsequent myocardial infarction of anterior wall            |
| 46017  | Other acute myocardial infarction NOS                        |
| 46112  | Postoperative transmural myocardial infarction anterior wall |
| 46166  | Subsequent myocardial infarction of unspecified site         |
| 46276  | Postoperative transmural myocardial infarction inferior wall |
| 52705  | ECG: lateral infarction                                      |
| 55401  | ECG: subendocardial infarct                                  |
| 59032  | ECG: myocardial infarct NOS                                  |
| 59189  | Ruptur cardiac wall w/out haemopericard/cur comp fol ac MI   |
| 59940  | Ruptur chordae tendinae/curr comp fol acute myocard infarct  |
| 61670  | Diab mellit insulin-glucose infus acute myocardial infarct   |
| 62626  | Acute papillary muscle infarction                            |
| 63467  | True posterior myocardial infarction                         |
| 68357  | Microinfarction of heart                                     |
| 68748  | Postoperative myocardial infarction, unspecified             |
| 69474  | Rupture papillary muscle/curr comp fol acute myocard infarct |
| 72562  | Subsequent myocardial infarction of other sites              |
| 96838  | [X]Acute transmural myocardial infarction of unspecif site   |
| 99991  | [X]Subsequent myocardial infarction of unspecified site      |
| 106812 | Postoperative transmural myocardial infarction unspec site   |
| 109035 | [X]Subsequent myocardial infarction of other sites           |

| icd   | icd_description                                            |
|-------|------------------------------------------------------------|
| I21   | Acute myocardial infarction                                |
| I21.0 | Acute transmural myocardial infarction of anterior wall    |
| I21.1 | Acute transmural myocardial infarction of inferior wall    |
| I21.2 | Acute transmural myocardial infarction of other sites      |
| I21.3 | Acute transmural myocardial infarction of unspecified site |
| I21.4 | Acute subendocardial myocardial infarction                 |
| I21.9 | Acute myocardial infarction, unspecified                   |
| I22   | Subsequent myocardial infarction                           |
| I22.0 | Subsequent myocardial infarction of anterior wall          |
| I22.1 | Subsequent myocardial infarction of inferior wall          |
| I22.8 | Subsequent myocardial infarction of other sites            |

|       |                                                              |
|-------|--------------------------------------------------------------|
| I22.9 | Subsequent myocardial infarction of unspecified site         |
| I23   | Certain current complication follow acute myocardial infarct |
| I23.0 | Haemopericardium as curr comp folow acut myocard infarct     |
| I23.1 | Atral sept defect as curr comp folow acut myocardal infarct  |
| I23.2 | Ventric sep defect as curr comp fol acut myocardal infarc    |
| I23.3 | Rup cardac wal withou haemopercard as cur comp fol ac MI     |
| I23.4 | Rup chordae tendinae as curr comp fol acut myocard infarct   |
| I23.5 | Rup papilary muscle as curr comp fol acute myocard infarct   |
| I23.6 | Thromb atrium/auric append/vent as curr comp foll acute MI   |
| I23.8 | Oth current comp following acute myocardial infarction       |

## Other ischaemic heart disease

| Medcode | Readterm                                                    |
|---------|-------------------------------------------------------------|
| 240     | Ischaemic heart disease                                     |
| 732     | Transluminal balloon angioplasty of coronary artery NOS     |
| 733     | Percutaneous transluminal angioplasty of artery NEC         |
| 737     | Coronary artery bypass graft operations                     |
| 1344    | Coronary artery disease                                     |
| 1414    | Angina on effort                                            |
| 1430    | Angina pectoris                                             |
| 1431    | Unstable angina                                             |
| 1655    | Triple vessel disease of the heart                          |
| 1676    | Ischaemic heart disease NOS                                 |
| 1792    | IHD - Ischaemic heart disease                               |
| 2155    | Ventricular cardiac aneurysm                                |
| 2901    | Transluminal balloon angioplasty of coronary artery         |
| 3159    | Other specified other bypass of coronary artery             |
| 3999    | Single coronary vessel disease                              |
| 4656    | Crescendo angina                                            |
| 5030    | [V]Presence of coronary artery bypass graft                 |
| 5254    | Double coronary vessel disease                              |
| 5413    | Coronary atherosclerosis                                    |
| 5674    | [V]Presence of coronary artery bypass graft - CABG          |
| 5703    | Percutaneous balloon coronary angioplasty                   |
| 5744    | Open angioplasty of coronary artery                         |
| 6182    | Other therapeutic transluminal op on coronary artery OS     |
| 6331    | Aneurysm of heart                                           |
| 6336    | H/O: angina pectoris                                        |
| 6980    | [V]Status following coronary angioplasty NOS                |
| 7134    | Other autograft bypass of coronary artery                   |
| 7137    | Saphenous vein graft replacement of coronary artery OS      |
| 7320    | Ischaemic cardiomyopathy                                    |
| 7347    | Unstable angina                                             |
| 7442    | Saphenous vein graft replacement of three coronary arteries |
| 7609    | Other autograft replacement of coronary artery NOS          |
| 7634    | Saphenous vein graft replacement of two coronary arteries   |
| 7696    | Syncope anginosa                                            |
| 8312    | Saphenous vein graft bypass of coronary artery              |
| 8568    | Cardiac syndrome X                                          |
| 8679    | Saphenous vein graft replacement of one coronary artery     |
| 8942    | Insertion of coronary artery stent                          |
| 9276    | Acute coronary insufficiency                                |
| 9413    | Other acute and subacute ischaemic heart disease            |

|       |                                                              |
|-------|--------------------------------------------------------------|
| 9414  | Other autograft replacement of coronary artery               |
| 9555  | Post infarct angina                                          |
| 10209 | Autograft replacement of three coronary arteries NEC         |
| 11048 | Variant angina pectoris                                      |
| 11610 | Saphenous vein graft replacement of four+ coronary arteries  |
| 11983 | Acute coronary syndrome                                      |
| 12734 | Coronary artery bypass graft occlusion                       |
| 12804 | Stable angina                                                |
| 12986 | Prinzmetal's angina                                          |
| 13185 | Angina control                                               |
| 14782 | Angina control - improving                                   |
| 15349 | Angina control NOS                                           |
| 15373 | Angina control - poor                                        |
| 15754 | Other chronic ischaemic heart disease NOS                    |
| 17307 | Angina at rest                                               |
| 18118 | Worsening angina                                             |
| 18125 | Nocturnal angina                                             |
| 18249 | Saphenous vein graft replacement of coronary artery          |
| 18643 | [V]Presence of coronary angioplasty implant and graft        |
| 18670 | Percut transluminal balloon angioplasty one coronary artery  |
| 18889 | Asymptomatic coronary heart disease                          |
| 18913 | [V]Presence of aortocoronary bypass graft                    |
| 19046 | Rotary blade coronary angioplasty                            |
| 19193 | Prosthetic replacement of coronary artery NOS                |
| 19402 | Prosthetic replacement of coronary artery                    |
| 19413 | Autograft replacement of two coronary arteries NEC           |
| 19542 | Angina control - good                                        |
| 19655 | Angina at rest                                               |
| 20095 | Angina decubitus                                             |
| 20416 | Atherosclerotic heart disease                                |
| 20903 | Peroperative angioplasty                                     |
| 21844 | Transient myocardial ischaemia                               |
| 22020 | Endarterectomy of coronary artery NEC                        |
| 22383 | Other specified ischaemic heart disease                      |
| 22647 | LIMA single anastomosis                                      |
| 22828 | Percutaneous transluminal laser coronary angioplasty         |
| 23078 | Chronic myocardial ischaemia                                 |
| 24540 | Chronic coronary insufficiency                               |
| 24783 | Arteriosclerotic heart disease                               |
| 24888 | Other therapeutic transluminal operations on coronary artery |
| 25842 | Angina pectoris NOS                                          |
| 26863 | New onset angina                                             |
| 27484 | Cardiac aneurysm                                             |

|       |                                                              |
|-------|--------------------------------------------------------------|
| 27951 | Other acute and subacute ischaemic heart disease             |
| 27977 | Other acute and subacute ischaemic heart disease NOS         |
| 28138 | Other chronic ischaemic heart disease                        |
| 28554 | Angina pectoris NOS                                          |
| 28837 | Creation of bypass from mammary artery to coronary artery    |
| 29300 | Angina control - worsening                                   |
| 29421 | Silent myocardial ischaemia                                  |
| 29902 | Angina decubitus NOS                                         |
| 31519 | Double implant of mammary arteries into coronary arteries    |
| 31540 | Revision of bypass for three coronary arteries               |
| 31556 | Allograft replacement of coronary artery                     |
| 31679 | Other therapeutic transluminal op on coronary artery NOS     |
| 32450 | Ischaemic chest pain                                         |
| 32651 | Allograft bypass of coronary artery                          |
| 33461 | Revision of bypass for coronary artery                       |
| 33471 | Other bypass of coronary artery NOS                          |
| 33620 | Repair of coronary artery NEC                                |
| 33650 | Percut transluminal coronary thrombolysis with streptokinase |
| 33718 | Double anastomosis of mammary arteries to coronary arteries  |
| 33735 | Percut translum balloon angioplasty mult coronary arteries   |
| 34328 | Refractory angina                                            |
| 34633 | Other specified chronic ischaemic heart disease              |
| 34963 | Other bypass of coronary artery                              |
| 35713 | Other specified chronic ischaemic heart disease NOS          |
| 36011 | Prosthetic bypass of coronary artery                         |
| 36523 | Preinfarction syndrome                                       |
| 36609 | Atherosclerotic cardiovascular disease                       |
| 36854 | Coronary artery spasm                                        |
| 37682 | Connection of mammary artery to coronary artery              |
| 37719 | Connection of mammary artery to coronary artery OS           |
| 38813 | Rotary blade angioplasty                                     |
| 39449 | Coronary thrombosis not resulting in myocardial infarction   |
| 39546 | [X]Other forms of angina pectoris                            |
| 39655 | Impending infarction                                         |
| 39693 | Subendocardial ischaemia                                     |
| 40996 | Percut translum coronary thrombolytic therapy- streptokinase |
| 41547 | Transluminal balloon angioplasty of coronary artery OS       |
| 41677 | Aneurysm of heart NOS                                        |
| 42304 | Insertion of drug-eluting coronary artery stent              |
| 42462 | Percut translum balloon angioplasty bypass graft coronary a  |
| 42708 | Autograft replacement of four of more coronary arteries NEC  |
| 43939 | Perc translumin balloon angioplasty stenting coronary artery |
| 44561 | Autograft replacement of one coronary artery NEC             |

|       |                                                              |
|-------|--------------------------------------------------------------|
| 44723 | Single anast mammary art to left ant descend coronary art    |
| 45370 | Allograft replacement of four or more coronary arteries      |
| 45886 | Allograft replacement of three coronary arteries             |
| 45960 | Antianginal therapy                                          |
| 47637 | [X]Other forms of chronic ischaemic heart disease            |
| 48767 | Allograft replacement of coronary artery NOS                 |
| 48822 | LIMA sequential anastomosis                                  |
| 51507 | Single anastomosis of mammary artery to coronary artery NEC  |
| 51515 | Saphenous vein graft replacement coronary artery NOS         |
| 52517 | [X]Ischaemic heart diseases                                  |
| 52938 | Revision of bypass for one coronary artery                   |
| 54251 | Preinfarction syndrome NOS                                   |
| 54535 | Stenocardia                                                  |
| 55092 | Replacement of coronary arteries using multiple methods      |
| 55137 | MI - myocardial infarction aborted                           |
| 55598 | Other replacement of coronary artery                         |
| 56990 | Connection of mammary artery to coronary artery NOS          |
| 57062 | H/O: Angina in last year                                     |
| 57241 | Allograft replacement of two coronary arteries               |
| 57634 | Revision of bypass for coronary artery NOS                   |
| 59193 | Aneurysm of coronary vessels                                 |
| 59423 | Other specified allograft replacement of coronary artery     |
| 60067 | Perc translum ball angio insert 1-2 drug elut stents cor art |
| 60753 | Single implantation thoracic artery into coronary artery NEC |
| 61072 | Myocardial infarction aborted                                |
| 61208 | Perc translum balloon angioplasty stenting coronary art NOS  |
| 61310 | Other autograft replacement of coronary artery OS            |
| 62608 | Double anastom thoracic arteries to coronary arteries NEC    |
| 63153 | Revision of implantation of thoracic artery into heart       |
| 64923 | Prosthetic graft patch angioplasty                           |
| 66236 | Prosthetic replacement of three coronary arteries            |
| 66388 | Status anginosus                                             |
| 66583 | Percut translum inject therap subst to coronary artery NEC   |
| 66664 | Prosthetic replacement of two coronary arteries              |
| 66921 | Percutaneous transluminal angioplasty of vascular graft      |
| 67087 | Other cardiac wall aneurysm                                  |
| 67554 | Revision of bypass for two coronary arteries                 |
| 67591 | Single anastomosis of thoracic artery to coronary artery NEC |
| 67761 | Prosthetic replacement of four or more coronary arteries     |
| 68123 | RIMA single anastomosis                                      |
| 68139 | Single implantation of mammary artery into coronary artery   |
| 68401 | [X]Other forms of acute ischaemic heart disease              |
| 69776 | Mechanical complication of coronary bypass                   |

|        |                                                              |
|--------|--------------------------------------------------------------|
| 70111  | Allograft replacement of one coronary artery                 |
| 70185  | Percutaneous transluminal atherectomy                        |
| 70755  | Replacement of coronary artery NOS                           |
| 72780  | Connection of other thoracic artery to coronary artery NOS   |
| 85947  | Perc translum balloon angioplasty insert 1-2 stents cor art  |
| 86071  | Percut translum cutting balloon angioplasty coronary artery  |
| 86773  | Percutaneous transluminal balloon angioplasty of artery      |
| 87849  | Perc tran ball angio ins 3 or more drug elut stents cor art  |
| 91774  | Acquired atrioventricular fistula of heart                   |
| 92233  | RIMA sequential anastomosis                                  |
| 92419  | Prosthetic replacement of one coronary artery                |
| 92927  | Percutaneous cor balloon angiop 3 more stents cor art NEC    |
| 93618  | Percutaneous transluminal atherectomy of coronary artery     |
| 93828  | Other specified replacement of coronary artery               |
| 96537  | OS perc translumina balloon angioplast stenting coronary art |
| 96804  | Connection of other thoracic artery to coronary artery       |
| 97953  | Other specified revision of bypass for coronary artery       |
| 101121 | Coronary artery bypass graft operation planned               |
| 101569 | Revision of bypass for four or more coronary arteries        |
| 103655 | Frequency of angina                                          |
| 105184 | Percutaneous coronary intervention                           |
| 105216 | H/O acute coronary syndrome                                  |
| 105250 | Mural cardiac aneurysm                                       |
| 105479 | Coronary microvascular disease                               |
| 107406 | Emergency percutaneous coronary intervention                 |
| 107574 | Referral to Angina Plan self-management programme            |
| 107967 | Angina self-management plan agreed                           |
| 108056 | Referral to Angina Plan self-management programme declined   |
| 109391 | Angina self-management plan review                           |

| icd   | icd_description                                            |
|-------|------------------------------------------------------------|
| I20   | Angina pectoris                                            |
| I20.0 | Unstable angina                                            |
| I20.1 | Angina pectoris with documented spasm                      |
| I20.8 | Other forms of angina pectoris                             |
| I20.9 | Angina pectoris, unspecified                               |
| I24   | Other acute ischaemic heart diseases                       |
| I24.0 | Coronary thrombosis not resulting in myocardial infarction |
| I24.8 | Other forms of acute ischaemic heart disease               |
| I24.9 | Acute ischaemic heart disease, unspecified                 |
| I25   | Chronic ischaemic heart disease                            |

|       |                                                      |
|-------|------------------------------------------------------|
| I25.0 | Atherosclerotic cardiovascular disease, so described |
| I25.1 | Atherosclerotic heart disease                        |
| I25.2 | Old myocardial infarction                            |
| I25.3 | Aneurysm of heart                                    |
| I25.4 | Coronary artery aneurysm                             |
| I25.5 | Ischaemic cardiomyopathy                             |
| I25.6 | Silent myocardial ischaemia                          |
| I25.8 | Other forms of chronic ischaemic heart disease       |
| I25.9 | Chronic ischaemic heart disease, unspecified         |
| Z95.5 | Presence of coronary angioplasty implant and graft   |

| <b>opcs</b> | <b>description</b>                                                  |
|-------------|---------------------------------------------------------------------|
| K40         | Saphenous vein graft replacement of coronary artery                 |
| K401        | Saphenous vein graft replacement of one coronary artery             |
| K402        | Saphenous vein graft replacement of two coronary arteries           |
| K403        | Saphenous vein graft replacement of three coronary arteries         |
| K404        | Saphenous vein graft replacement of four or more coronary arteries  |
| K408        | Other specified saphenous vein graft replacement of coronary artery |
| K409        | Unspecified saphenous vein graft replacement of coronary artery     |
| K41         | Other autograft replacement of coronary artery                      |
| K411        | Autograft replacement of one coronary artery NEC                    |
| K412        | Autograft replacement of two coronary arteries NEC                  |
| K413        | Autograft replacement of three coronary arteries NEC                |
| K414        | Autograft replacement of four or more coronary arteries NEC         |
| K418        | Other specified other autograft replacement of coronary artery      |
| K419        | Unspecified other autograft replacement of coronary artery          |
| K42         | Allograft replacement of coronary artery                            |
| K421        | Allograft replacement of one coronary artery                        |
| K422        | Allograft replacement of two coronary arteries                      |
| K423        | Allograft replacement of three coronary arteries                    |
| K424        | Allograft replacement of four or more coronary arteries             |
| K428        | Other specified allograft replacement of coronary artery            |
| K429        | Unspecified allograft replacement of coronary artery                |
| K43         | Prosthetic replacement of coronary artery                           |
| K431        | Prosthetic replacement of one coronary artery                       |
| K432        | Prosthetic replacement of two coronary arteries                     |
| K433        | Prosthetic replacement of three coronary arteries                   |
| K434        | Prosthetic replacement of four or more coronary arteries            |
| K438        | Other specified prosthetic replacement of coronary artery           |
| K439        | Unspecified prosthetic replacement of coronary artery               |
| K44         | Other replacement of coronary artery                                |



|      |                                                                                                                   |
|------|-------------------------------------------------------------------------------------------------------------------|
| K441 | Replacement of coronary arteries using multiple methods                                                           |
| K442 | Revision of replacement of coronary artery                                                                        |
| K448 | Other specified other replacement of coronary artery                                                              |
| K449 | Unspecified other replacement of coronary artery                                                                  |
| K45  | Connection of thoracic artery to coronary artery                                                                  |
| K451 | Double anastomosis of mammary arteries to coronary arteries                                                       |
| K452 | Double anastomosis of thoracic arteries to coronary arteries NEC                                                  |
| K453 | Anastomosis of mammary artery to left anterior descending coronary artery                                         |
| K454 | Anastomosis of mammary artery to coronary artery NEC                                                              |
| K455 | Anastomosis of thoracic artery to coronary artery NEC                                                             |
| K456 | Revision of connection of thoracic artery to coronary artery                                                      |
| K458 | Other specified connection of thoracic artery to coronary artery                                                  |
| K459 | Unspecified connection of thoracic artery to coronary artery                                                      |
| K46  | Other bypass of coronary artery                                                                                   |
| K461 | Double implantation of mammary arteries into heart                                                                |
| K462 | Double implantation of thoracic arteries into heart NEC                                                           |
| K463 | Implantation of mammary artery into heart NEC                                                                     |
| K464 | Implantation of thoracic artery into heart NEC                                                                    |
| K465 | Revision of implantation of thoracic artery into heart                                                            |
| K468 | Other specified other bypass of coronary artery                                                                   |
| K469 | Unspecified other bypass of coronary artery                                                                       |
| K471 | Endarterectomy of coronary artery                                                                                 |
| K49  | Transluminal balloon angioplasty of coronary artery                                                               |
| K491 | Percutaneous transluminal balloon angioplasty of one coronary artery                                              |
| K492 | Percutaneous transluminal balloon angioplasty of multiple coronary arteries                                       |
| K493 | Percutaneous transluminal balloon angioplasty of bypass graft of coronary artery                                  |
| K494 | Percutaneous transluminal cutting balloon angioplasty of coronary artery                                          |
| K498 | Other specified transluminal balloon angioplasty of coronary artery                                               |
| K499 | Unspecified transluminal balloon angioplasty of coronary artery                                                   |
| K50  | Other therapeutic transluminal operations on coronary artery                                                      |
| K501 | Percutaneous transluminal laser coronary angioplasty                                                              |
| K502 | Percutaneous transluminal coronary thrombolysis using streptokinase                                               |
| K503 | Percutaneous transluminal injection of therapeutic substance into coronary artery NEC                             |
| K504 | Percutaneous transluminal atherectomy of coronary artery                                                          |
| K508 | Other specified other therapeutic transluminal operations on coronary artery                                      |
| K509 | Unspecified other therapeutic transluminal operations on coronary artery                                          |
| K75  | Percutaneous transluminal balloon angioplasty and insertion of stent into coronary artery                         |
| K751 | Percutaneous transluminal balloon angioplasty and insertion of 1-2 drug-eluting stents into coronary artery       |
| K752 | Percutaneous transluminal balloon angioplasty and insertion of 3 or more drug-eluting stents into coronary artery |
| K753 | Percutaneous transluminal balloon angioplasty and insertion of 1-2 stents into coronary artery                    |
| K754 | Percutaneous transluminal balloon angioplasty and insertion of 3 or more stents into coronary artery NEC          |

|      |                                                                                                           |
|------|-----------------------------------------------------------------------------------------------------------|
| K758 | Other specified percutaneous transluminal balloon angioplasty and insertion of stent into coronary artery |
| K759 | Unspecified percutaneous transluminal balloon angioplasty and insertion of stent into coronary artery     |

## Hypertension

| Medcode | Readterm                                                    |
|---------|-------------------------------------------------------------|
| 204     | Hypertensive disease                                        |
| 351     | High blood pressure                                         |
| 799     | Essential hypertension                                      |
| 1894    | Benign essential hypertension                               |
| 3712    | Hypertension NOS                                            |
| 3979    | Hypertensive encephalopathy                                 |
| 4372    | Systolic hypertension                                       |
| 4668    | Hypertensive renal disease                                  |
| 6702    | Hypertensive retinopathy                                    |
| 7057    | Hypertensive disease NOS                                    |
| 7329    | Secondary hypertension                                      |
| 8732    | BP - hypertensive disease                                   |
| 8857    | Cardiomegaly - hypertensive                                 |
| 10818   | Essential hypertension NOS                                  |
| 15106   | Hypertensive renal disease NOS                              |
| 15377   | Malignant essential hypertension                            |
| 16059   | Secondary hypertension NOS                                  |
| 16173   | Hypertensive heart disease NOS                              |
| 16292   | Hypertensive heart disease                                  |
| 16565   | Good hypertension control                                   |
| 17434   | Nephrosclerosis                                             |
| 18590   | Moderate hypertension control                               |
| 18765   | Other specified hypertensive disease                        |
| 21837   | Hypertensive heart&renal dis wth (congestive) heart failure |
| 25371   | Secondary benign renovascular hypertension                  |
| 27511   | Poor hypertension control                                   |
| 28684   | Hypertensive heart and renal disease with renal failure     |
| 29310   | Renal hypertension                                          |
| 31341   | Hypertension secondary to drug                              |
| 31387   | Secondary renovascular hypertension NOS                     |
| 31464   | Hypertensive heart disease NOS                              |
| 31755   | Secondary malignant hypertension                            |
| 31816   | Hypertensive crisis                                         |
| 32423   | Hypertensive renal disease with renal failure               |
| 32976   | Hypertension induced by oral contraceptive pill             |
| 34744   | Hypertension secondary to endocrine disorders               |
| 37086   | Blind hypertensive eye                                      |
| 39649   | Malignant hypertensive renal disease                        |
| 42229   | Secondary hypertension NOS                                  |
| 43935   | Benign hypertensive renal disease                           |

|        |                                                              |
|--------|--------------------------------------------------------------|
| 50157  | Malignant hypertensive heart disease                         |
| 51635  | Secondary benign hypertension NOS                            |
| 52127  | Benign hypertensive heart disease with CCF                   |
| 52427  | Benign hypertensive heart disease                            |
| 57288  | Secondary benign hypertension                                |
| 57987  | Hyperten heart&renal dis+both(congestv)heart and renal fail  |
| 59383  | Secondary malignant renovascular hypertension                |
| 61166  | Hypertensive heart disease NOS without CCF                   |
| 61660  | Benign hypertensive heart disease without CCF                |
| 62718  | Hypertensive heart disease NOS with CCF                      |
| 63000  | Benign hypertensive heart and renal disease                  |
| 63466  | Hypertensive heart and renal disease                         |
| 67232  | Malignant hypertensive heart and renal disease               |
| 68659  | Hypertensive heart and renal disease NOS                     |
| 69753  | [X]Hypertensive diseases                                     |
| 72668  | Malignant hypertensive heart disease with CCF                |
| 73293  | Secondary malignant hypertension NOS                         |
| 83473  | Diastolic hypertension                                       |
| 95334  | Malignant hypertensive heart disease without CCF             |
| 97533  | [X]Hypertension secondary to other renal disorders           |
| 102458 | [X]Other secondary hypertension                              |
| 103046 | Malignant hypertensive heart disease NOS                     |
| 105274 | Stage 2 hypertension (NICE - Nat Ins for Hth Clin Excl 2011) |
| 105316 | Stage 1 hypertension                                         |
| 105371 | Stage 1 hypertension (NICE - Nat Ins for Hth Clin Excl 2011) |
| 105480 | Hypertension resistant to drug therapy                       |
| 105487 | Severe hypertension                                          |
| 105938 | Benign hypertensive heart disease NOS                        |
| 105989 | Severe hypertension (Nat Inst for Health Clinical Ex 2011)   |
| 107704 | Primary hypertension                                         |
| 19342  | Hypertension resolved                                        |
| 3269   | Hypertension resolved                                        |
| 2666   | H/O: hypertension                                            |
| 98230  | Lifestyle advice regarding hypertension                      |
| 18057  | Antihypertensive therapy                                     |
| 12948  | Hypertension treatm.stopped                                  |
| 22333  | Hypertension treatment refused                               |
| 101649 | Other specified high cost hypertension drugs                 |
| 85944  | High cost hypertension drugs                                 |
| 13188  | Hypertensive treatm.changed                                  |
| 3425   | On treatment for hypertension                                |
| 21826  | Hypertension treatm. started                                 |
| 12680  | Hypertension clinical management plan                        |

|        |                                          |
|--------|------------------------------------------|
| 109611 | Hypertension self-management plan agreed |
| 102406 | Hypertension 9 month review              |
| 30776  | Hypertension:follow-up default           |
| 19070  | Hypertension annual review               |
| 18482  | Hypertension six month review            |

| icd   | icd_description                                            |
|-------|------------------------------------------------------------|
| I10   | Essential (primary) hypertension                           |
| I11   | Hypertensive heart disease                                 |
| I11.0 | Hypertensive heart disease with (congestive) heart failure |
| I11.9 | Hypertensive heart disease without (conges) heart failure  |
| I12   | Hypertensive renal disease                                 |
| I12.0 | Hypertensive renal disease with renal failure              |
| I12.9 | Hypertensive renal disease without renal failure           |
| I13   | Hypertensive heart and renal disease                       |
| I13.0 | Hypertens heart and renal dis with (conges) heart failure  |
| I13.1 | Hypertensive heart and renal disease with renal failure    |
| I13.2 | Hyper heart and renal dis both (cong) heart and renal fail |
| I13.9 | Hypertensive heart and renal disease, unspecified          |
| I15   | Secondary hypertension                                     |
| I15.0 | Renovascular hypertension                                  |
| I15.1 | Hypertension secondary to other renal disorders            |
| I15.2 | Hypertension secondary to endocrine disorders              |
| I15.8 | Other secondary hypertension                               |
| I15.9 | Secondary hypertension, unspecified                        |
| I67.4 | Hypertensive encephalopathy                                |

## Alcoholic liver disease

| Medcode | Readterm                                                    |
|---------|-------------------------------------------------------------|
| 1638    | Cirrhosis of liver NOS                                      |
| 3216    | Acute alcoholic hepatitis                                   |
| 3450    | Diffuse nodular cirrhosis                                   |
| 4743    | Alcoholic cirrhosis of liver                                |
| 5129    | Portal hypertension                                         |
| 6015    | [X]Other and unspecified cirrhosis of liver                 |
| 6863    | Cirrhosis and chronic liver disease                         |
| 7602    | Chronic alcoholic hepatitis                                 |
| 7885    | Alcoholic liver damage unspecified                          |
| 7943    | Alcoholic hepatitis                                         |
| 8363    | Oesophageal varices in alcoholic cirrhosis of the liver     |
| 10691   | Alcoholic fatty liver                                       |
| 17330   | Alcoholic hepatic failure                                   |
| 21713   | Alcoholic fibrosis and sclerosis of liver                   |
| 22841   | Macronodular cirrhosis of liver                             |
| 26319   | Oesophageal varices in cirrhosis of the liver               |
| 40567   | Capsular portal cirrhosis                                   |
| 44120   | Toxic liver disease with fibrosis and cirrhosis of liver    |
| 44676   | Fatty portal cirrhosis                                      |
| 47257   | Portal cirrhosis                                            |
| 55454   | Portal cirrhosis unspecified                                |
| 68376   | Florid cirrhosis                                            |
| 69204   | Multilobular portal cirrhosis                               |
| 92909   | Hypertrophic portal cirrhosis                               |
| 100474  | Laennec's cirrhosis                                         |
| 100592  | Hepatic fibrosis with hepatic sclerosis                     |
| 71240   | Transjugular intrahepatic creation of portosystemic shunt   |
| 87861   | Oth transjugular intrahepatic operations blood vessel liver |
| 89356   | Percutaneous transluminal insertion of stent portal vein    |
| 90925   | Transjugular intrahepatic operations blood vessel of liver  |
| 93737   | Transjugular intrahepatic insertion stent into portal vein  |
| 95118   | Percutan transluminal insertion of stent graft portal vein  |
| 106179  | Transjugular intrahepatic angioplasty of portal vein        |
| 106828  | Transjugular intrahepatic operations blood vessel liver NOS |
| 107093  | Transjugular intrahepatic ins stent graft into portal vein  |

| icd   | icd_description         |
|-------|-------------------------|
| K70   | Alcoholic liver disease |
| K70.0 | Alcoholic fatty liver   |

|       |                                           |
|-------|-------------------------------------------|
| K70.1 | Alcoholic hepatitis                       |
| K70.2 | Alcoholic fibrosis and sclerosis of liver |
| K70.3 | Alcoholic cirrhosis of liver              |
| K70.4 | Alcoholic hepatic failure                 |
| K70.9 | Alcoholic liver disease, unspecified      |
| K76.6 | Portal hypertension                       |

| <b>opcs</b> | <b>description</b>                                                            |
|-------------|-------------------------------------------------------------------------------|
| J111        | Transjugular intrahepatic angioplasty of portal vein                          |
| J114        | Transjugular intrahepatic creation of portosystemic shunt                     |
| J118        | Other specified transjugular intrahepatic operations on blood vessel of liver |
| J119        | Unspecified transjugular intrahepatic operations on blood vessel of liver     |

## Pancreatitis

| Medcode | Readterm                             |
|---------|--------------------------------------|
| 1419    | Chronic pancreatitis                 |
| 24984   | Alcohol-induced chronic pancreatitis |
| 49353   | [X]Other chronic pancreatitis        |
| 71633   | History of chronic pancreatitis      |
| 104611  | Alcohol-induced acute pancreatitis   |

| icd   | icd_description                      |
|-------|--------------------------------------|
| K85   | Acute pancreatitis                   |
| K86.0 | Alcohol-induced chronic pancreatitis |
| K86.1 | Other chronic pancreatitis           |



## Peripheral artery disease

| Medcode | Readterm                                                |
|---------|---------------------------------------------------------|
| 44835   | Embolism and thrombosis of a leg artery NOS             |
| 30495   | Embolism and thrombosis of an arm artery NOS            |
| 44085   | Embolism and thrombosis of an arm or leg artery         |
| 41597   | Embolism and thrombosis of other arteries NOS           |
| 32235   | Embolism and thrombosis of other specified artery       |
| 69232   | Embolism and thrombosis of the anterior tibial artery   |
| 31460   | Embolism and thrombosis of the axillary artery          |
| 34159   | Embolism and thrombosis of the brachial artery          |
| 47665   | Embolism and thrombosis of the coeliac artery           |
| 71860   | Embolism and thrombosis of the dorsalis pedis artery    |
| 2065    | Embolism and thrombosis of the femoral artery           |
| 27494   | Embolism and thrombosis of the iliac artery unspecified |
| 4539    | Embolism and thrombosis of the popliteal artery         |
| 99532   | Embolism and thrombosis of the posterior tibial artery  |
| 29372   | Embolism and thrombosis of the radial artery            |
| 6900    | Embolism and thrombosis of the subclavian artery        |
| 62368   | Embolism and thrombosis of the ulnar artery             |
| 54865   | Embolism and/or thrombosis of the common iliac artery   |
| 56919   | Embolism and/or thrombosis of the external iliac artery |
| 32634   | Embolism and/or thrombosis of the internal iliac artery |
| 15302   | Peripheral arterial embolism and thrombosis NOS         |
| 109425  | [X]Embolism and thrombosis of other arteries            |
| 28004   | Arterial embolic and thrombotic occlusion               |
| 4289    | Arterial embolism and thrombosis                        |
| 3714    | Arterial embolism and thrombosis NOS                    |
| 8998    | Arterial embolus and thrombosis                         |
| 107071  | ARAS - Atherosclerotic renal artery stenosis            |
| 16284   | Renal artery atherosclerosis                            |
| 23871   | Peripheral angiopathic disease EC NOS                   |
| 100579  | [X]Atherosclerosis of other arteries                    |
| 996     | Arteriosclerosis                                        |
| 3995    | Arteriosclerotic vascular disease NOS                   |
| 5640    | Atherosclerosis                                         |
| 36609   | Atherosclerotic cardiovascular disease                  |
| 56621   | Cardiovascular arteriosclerosis unspecified             |
| 5168    | Other specified artery atheroma                         |
| 51804   | Monckeberg's medial sclerosis                           |
| 4970    | [D]Gangrene                                             |
| 37750   | [D]Gangrene NOS                                         |
| 73961   | [X]Other specified peripheral vascular diseases         |

|        |                                                              |
|--------|--------------------------------------------------------------|
| 23497  | Buerger's disease                                            |
| 6853   | Claudication                                                 |
| 7975   | Claudication distance                                        |
| 12735  | Gangrene of foot                                             |
| 5414   | Gangrene of toe                                              |
| 1517   | Intermittent claudication                                    |
| 1826   | Ischaemia of legs                                            |
| 98174  | Ischaemic foot                                               |
| 6308   | Ischaemic leg ulcer                                          |
| 9561   | Ischaemic toe                                                |
| 40068  | Presenile gangrene                                           |
| 34638  | Thromboangiitis obliterans                                   |
| 67401  | Thromboangiitis obliterans NOS                               |
| 101866 | Vascular claudication                                        |
| 9204   | Peripheral gangrene                                          |
| 14797  | Extremity artery atheroma                                    |
| 16260  | Extremity artery atheroma NOS                                |
| 18423  | Arterial insufficiency                                       |
| 38907  | Other specified peripheral vascular disease                  |
| 4325   | Other specified peripheral vascular disease NOS              |
| 6827   | Peripheral ischaemia                                         |
| 5702   | Peripheral ischaemic vascular disease                        |
| 105317 | Peripheral arterial disease                                  |
| 3530   | Peripheral vascular disease NOS                              |
| 2760   | Peripheral vascular disease NOS                              |
| 39949  | Gangrene of finger                                           |
| 23672  | Gangrene of hand                                             |
| 5943   | Other peripheral vascular disease                            |
| 2066   | Other bypass of femoral artery or popliteal artery NOS       |
| 9099   | Other emergency bypass of femoral artery or popliteal artery |
| 11766  | Other emergency bypass of femoral artery                     |
| 12331  | Other bypass of popliteal artery                             |
| 18060  | Other bypass of femoral artery                               |
| 21927  | Other bypass of iliac artery                                 |
| 22016  | Femoro-femoral prosthetic cross over graft                   |
| 24097  | Bypass popliteal artery by pop/pop a anast c vein graft NEC  |
| 24692  | Other bypass of femoral artery or popliteal artery           |
| 27580  | Bypass femoral artery by fem/pop art anast c prosthesis NEC  |
| 28030  | Bypass femoral artery by fem/pop art anast c vein graft NEC  |
| 28616  | Bypass iliac artery by iliac/femoral artery anastomosis NEC  |
| 30989  | Femoro-femoral prosthetic cross over graft                   |
| 32492  | Bypass common iliac artery by aorta/com iliac art anast NEC  |
| 36065  | Endarterectomy and patch repair of common iliac artery       |

|       |                                                              |
|-------|--------------------------------------------------------------|
| 36443 | Bypass iliac artery by femoral/femoral art anastomosis NEC   |
| 37787 | Other bypass of common femoral artery                        |
| 38921 | Other bypass of iliac artery NOS                             |
| 39776 | Other emergency bypass of popliteal artery                   |
| 39877 | Bypass femoral artery by fem/tib art anast c prosthesis NEC  |
| 40732 | Other bypass of superficial femoral artery                   |
| 41768 | Ilio-femoral prosthetic cross over graft                     |
| 41823 | Bypass femoral artery by fem/tib art anast c vein graft NEC  |
| 42115 | Bypass popliteal artery by pop/fem artery anastomosis NEC    |
| 42640 | Other bypass of femoral artery or popliteal artery OS        |
| 43648 | Emergency femoro-femoral prosthetic cross over graft         |
| 43651 | Emerg bypass femoral art by fem/pop art anast c prosth NEC   |
| 44250 | Emerg bypass iliac art by iliac/femoral art anastomosis NEC  |
| 45428 | Bypass femoral artery by femoral/femoral art anastomosis NEC |
| 48700 | Bypass popliteal artery by pop/tib a anast c vein graft NEC  |
| 48755 | Emerg bypass bifurc aorta by anast aorta to femoral artery   |
| 48939 | Emerg bypass femoral artery by fem/fem art anastomosis NEC   |
| 52342 | Emerg bypass femoral art by fem/pop a anast c vein graft NEC |
| 52357 | Other specified other bypass of iliac artery                 |
| 53675 | Bypass femoral artery by fem/peron a anast c vein graft NEC  |
| 55554 | Bypass leg artery by aorta/com femoral art anastomosis NEC   |
| 60465 | Bypass popliteal artery by pop/tib a anast c prosthesis NEC  |
| 60693 | Emerg bypass pop art by pop/pop art anast c vein graft NEC   |
| 61974 | Other bypass of femoral or popliteal artery by anastomosis   |
| 62775 | Emerg bypass pop art by pop/peron art anast c vein graft NEC |
| 63238 | Other emergency bypass of deep femoral artery                |
| 64555 | Bypass popliteal artery by pop/pop a anast c prosthesis NEC  |
| 65692 | Other emergency bypass of femoral or popliteal artery OS     |
| 66804 | Bypass leg artery by aorta/deep femoral art anastomosis NEC  |
| 66820 | Emerg bypass femoral art by fem/tib art anast c prosth NEC   |
| 66879 | Emerg bypass pop art by pop/tib art anast c vein graft NEC   |
| 66917 | Emerg bypass leg artery by aorta/com fem art anastomosis NEC |
| 67818 | Emerg bypass popliteal art by pop/pop art anast c prosth NEC |
| 67982 | Bypass femoral artery by fem/peron a anast c prosthesis NEC  |
| 68141 | Emerg bypass comm iliac art by aorta/com iliac art anast NEC |
| 68320 | Other emergency bypass of femoral or popliteal artery NOS    |
| 68412 | Bypass popliteal art by pop/peron art anast c vein graft NEC |
| 70922 | Emerg bypass popliteal artery by pop/fem art anastomosis NEC |
| 72448 | Emerg bypass iliac artery by femoral/femoral art anast NEC   |
| 72491 | Other emerg bypass femoral or popliteal art by anastomosis   |
| 96255 | Emerg bypass femoral art by fem/tib a anast c vein graft NEC |
| 97606 | Other emergency bypass of superficial femoral artery         |
| 99676 | Emerg bypass femoral art by fem/peron art anast c prosth NEC |

|        |                                                             |
|--------|-------------------------------------------------------------|
| 100036 | Bypass iliac artery by iliac/iliac artery anastomosis NEC   |
| 100113 | Other emergency bypass of common femoral artery             |
| 101910 | Other bypass of iliac artery by anastomosis                 |
| 102031 | Emerg bypass abdominal aorta by anastom aorta to aorta NEC  |
| 107158 | Bypass popliteal artery by pop/peron art anast c prosth NEC |

| icd   | icd_description                                              |
|-------|--------------------------------------------------------------|
| I70.1 | Atherosclerosis of renal artery                              |
| I70.2 | Atherosclerosis of arteries of extremities                   |
| I70.8 | Atherosclerosis of other arteries                            |
| I70.9 | Generalized and unspecified atherosclerosis                  |
| I73.1 | Thromboangiitis obliterans [Buerger]                         |
| I73.8 | Other specified peripheral vascular diseases                 |
| I73.9 | Peripheral vascular disease, unspecified                     |
| I74.2 | Embolism and thrombosis of arteries of upper extremities     |
| I74.3 | Embolism and thrombosis of arteries of lower extremities     |
| I74.4 | Embolism and thrombosis of arteries of extremities, unspec   |
| I74.5 | Embolism and thrombosis of iliac artery                      |
| I74.8 | Embolism and thrombosis of other arteries                    |
| I74.9 | Embolism and thrombosis of unspecified artery                |
| I79.2 | Peripheral angiopathy in diseases classified elsewhere       |
| I79.8 | Oth disord arteries, arterioles & capillaries in diseases CE |

| opcs | description                                                                                |
|------|--------------------------------------------------------------------------------------------|
| L50  | Other emergency bypass of iliac artery                                                     |
| L501 | Emergency bypass of common iliac artery by anastomosis of aorta to common iliac artery NEC |
| L502 | Emergency bypass of iliac artery by anastomosis of aorta to external iliac artery NEC      |
| L503 | Emergency bypass of artery of leg by anastomosis of aorta to common femoral artery NEC     |
| L504 | Emergency bypass of artery of leg by anastomosis of aorta to deep femoral artery NEC       |
| L505 | Emergency bypass of iliac artery by anastomosis of iliac artery to iliac artery NEC        |
| L506 | Emergency bypass of artery of leg by anastomosis of iliac artery to femoral artery NEC     |
| L508 | Other specified other emergency bypass of iliac artery                                     |
| L509 | Unspecified other emergency bypass of iliac artery                                         |
| L51  | Other bypass of iliac artery                                                               |
| L511 | Bypass of common iliac artery by anastomosis of aorta to common iliac artery NEC           |
| L512 | Bypass of iliac artery by anastomosis of aorta to external iliac artery NEC                |
| L513 | Bypass of artery of leg by anastomosis of aorta to common femoral artery NEC               |
| L514 | Bypass of artery of leg by anastomosis of aorta to deep femoral artery NEC                 |

|      |                                                                                                              |
|------|--------------------------------------------------------------------------------------------------------------|
| L515 | Bypass of iliac artery by anastomosis of iliac artery to iliac artery NEC                                    |
| L516 | Bypass of artery of leg by anastomosis of iliac artery to femoral artery NEC                                 |
| L518 | Other specified other bypass of iliac artery                                                                 |
| L519 | Unspecified other bypass of iliac artery                                                                     |
| L52  | Reconstruction of iliac artery                                                                               |
| L521 | Endarterectomy of iliac artery and patch repair of iliac artery                                              |
| L522 | Endarterectomy of iliac artery NEC                                                                           |
| L528 | Other specified reconstruction of iliac artery                                                               |
| L529 | Unspecified reconstruction of iliac artery                                                                   |
| L531 | Repair of iliac artery NEC                                                                                   |
| L532 | Open embolectomy of iliac artery                                                                             |
| L538 | Other specified other open operations on iliac artery                                                        |
| L539 | Unspecified other open operations on iliac artery                                                            |
| L54  | Transluminal operations on iliac artery                                                                      |
| L541 | Percutaneous transluminal angioplasty of iliac artery                                                        |
| L542 | Percutaneous transluminal embolectomy of iliac artery                                                        |
| L544 | Percutaneous transluminal insertion of stent into iliac artery                                               |
| L548 | Other specified transluminal operations on iliac artery                                                      |
| L549 | Unspecified transluminal operations on iliac artery                                                          |
| L58  | Other emergency bypass of femoral artery                                                                     |
| L581 | Emergency bypass of femoral artery by anastomosis of femoral artery to femoral artery NEC                    |
| L582 | Emergency bypass of femoral artery by anastomosis of femoral artery to popliteal artery using prosthesis NEC |
| L583 | Emergency bypass of femoral artery by anastomosis of femoral artery to popliteal artery using vein graft NEC |
| L584 | Emergency bypass of femoral artery by anastomosis of femoral artery to tibial artery using prosthesis NEC    |
| L585 | Emergency bypass of femoral artery by anastomosis of femoral artery to tibial artery using vein graft NEC    |
| L586 | Emergency bypass of femoral artery by anastomosis of femoral artery to peroneal artery using prosthesis NEC  |
| L587 | Emergency bypass of femoral artery by anastomosis of femoral artery to peroneal artery using vein graft NEC  |
| L588 | Other specified other emergency bypass of femoral artery                                                     |
| L589 | Unspecified other emergency bypass of femoral artery                                                         |
| L59  | Other bypass of femoral artery                                                                               |
| L591 | Bypass of femoral artery by anastomosis of femoral artery to femoral artery NEC                              |
| L592 | Bypass of femoral artery by anastomosis of femoral artery to popliteal artery using prosthesis NEC           |
| L593 | Bypass of femoral artery by anastomosis of femoral artery to popliteal artery using vein graft NEC           |
| L594 | Bypass of femoral artery by anastomosis of femoral artery to tibial artery using prosthesis NEC              |
| L595 | Bypass of femoral artery by anastomosis of femoral artery to tibial artery using vein graft NEC              |
| L596 | Bypass of femoral artery by anastomosis of femoral artery to peroneal artery using prosthesis NEC            |
| L597 | Bypass of femoral artery by anastomosis of femoral artery to peroneal artery using vein graft NEC            |
| L598 | Other specified other bypass of femoral artery                                                               |
| L599 | Unspecified other bypass of femoral artery                                                                   |

|      |                                                                          |
|------|--------------------------------------------------------------------------|
| L60  | Reconstruction of femoral artery                                         |
| L601 | Endarterectomy of femoral artery and patch repair of femoral artery      |
| L602 | Endarterectomy of femoral artery NEC                                     |
| L603 | Profundoplasty of femoral artery and patch repair of deep femoral artery |
| L604 | Profundoplasty of femoral artery NEC                                     |
| L608 | Other specified reconstruction of femoral artery                         |
| L609 | Unspecified reconstruction of femoral artery                             |
| L621 | Repair of femoral artery NEC                                             |
| L622 | Open embolectomy of femoral artery                                       |
| L628 | Other specified other open operations on femoral artery                  |
| L629 | Unspecified other open operations on femoral artery                      |
| L631 | Percutaneous transluminal angioplasty of femoral artery                  |
| L632 | Percutaneous transluminal embolectomy of femoral artery                  |
| L633 | Percutaneous transluminal embolisation of femoral artery                 |
| L635 | Percutaneous transluminal insertion of stent into femoral artery         |
| L638 | Other specified transluminal operations on femoral artery                |
| L639 | Unspecified transluminal operations on femoral artery                    |
| L651 | Revision of reconstruction involving aorta                               |
| L652 | Revision of reconstruction involving iliac artery                        |
| L653 | Revision of reconstruction involving femoral artery                      |

## Heart failure

| Medcode | Readterm                                                    |
|---------|-------------------------------------------------------------|
| 23707   | Acute congestive heart failure                              |
| 398     | Congestive heart failure                                    |
| 884     | Left ventricular failure                                    |
| 1223    | Cardiac failure                                             |
| 2062    | Heart failure                                               |
| 2906    | Congestive cardiac failure                                  |
| 4024    | Heart failure NOS                                           |
| 5255    | Acute left ventricular failure                              |
| 5942    | Impaired left ventricular function                          |
| 7251    | Impaired left ventricular function                          |
| 8966    | Left ventricular systolic dysfunction                       |
| 9524    | Biventricular failure                                       |
| 9913    | Heart failure confirmed                                     |
| 10079   | Right heart failure                                         |
| 10154   | Right ventricular failure                                   |
| 11424   | Compensated cardiac failure                                 |
| 12550   | Left ventricular diastolic dysfunction                      |
| 13189   | New York Heart Association classification - class II        |
| 17278   | Cardiac failure NOS                                         |
| 19066   | New York Heart Association classification - class III       |
| 19380   | Heart failure review completed                              |
| 21837   | Hypertensive heart&renal dis wth (congestive) heart failure |
| 23481   | Asthma - cardiac                                            |
| 24503   | Cardiac failure therapy                                     |
| 26242   | New York Heart Assoc classification heart failure symptoms  |
| 27884   | Decompensated cardiac failure                               |
| 27964   | Acute heart failure                                         |
| 32671   | Chronic congestive heart failure                            |
| 32898   | Admit heart failure emergency                               |
| 46672   | New York Heart Assoc classification heart failure symptoms  |
| 46912   | H/O: Heart failure in last year                             |
| 51214   | New York Heart Association classification - class IV        |
| 52127   | Benign hypertensive heart disease with CCF                  |
| 57987   | Hyperten heart&renal dis+both(congestv)heart and renal fail |
| 62718   | Hypertensive heart disease NOS with CCF                     |
| 66306   | Heart failure as a complication of care                     |
| 68682   | Cardiac insufficiency as a complication of care             |
| 72668   | Malignant hypertensive heart disease with CCF               |
| 94870   | Congestive heart failure due to valvular disease            |
| 96799   | Post cardiac operation heart failure NOS                    |

|        |                                                             |
|--------|-------------------------------------------------------------|
| 103732 | Has heart failure management plan                           |
| 104275 | Right ventricular failure                                   |
| 105542 | Preferred place of care for next exacerbation heart failure |
| 106897 | Heart failure with preserved ejection fraction              |
| 104333 | Diastolic dysfunction                                       |
| 104876 | Right ventricular diastolic dysfunction                     |
| 6434   | Paroxysmal nocturnal dyspnoea                               |
| 107397 | Left ventricular cardiac dysfunction                        |
| 15058  | H/O: heart failure                                          |
| 100784 | Heart failure resolved                                      |
| 101137 | HFNEF - heart failure with normal ejection fraction         |
| 101138 | Heart failure with normal ejection fraction                 |
| 18853  | New York Heart Association classification - class I         |
| 17851  | Heart failure follow-up                                     |
| 30779  | Heart failure annual review                                 |
| 83502  | Heart failure 6 month review                                |
| 106198 | Heart failure self-management plan agreed                   |
| 32945  | Heart failure care plan discussed with patient              |
| 7321   | Pulmonary oedema NOS                                        |
| 26082  | Chronic pulmonary oedema                                    |
| 39706  | Postoperative pulmonary oedema                              |
| 43618  | Pulmonary oedema - acute                                    |
| 48466  | Acute oedema of lung, unspecified                           |
| 102627 | Worsening pulmonary oedema                                  |
| 558    | Acute pulmonary oedema unspecified                          |
| 1585   | Pulmonary congestion                                        |
| 5155   | O/E - pulmonary oedema                                      |
| 5293   | Acute pulmonary oedema NOS                                  |
| 22262  | Rheumatic left ventricular failure                          |
| 20324  | [D]Cardiorespiratory failure                                |
| 8464   | Acute cor pulmonale                                         |
| 5695   | Chronic cor pulmonale                                       |

| icd   | icd_description                                            |
|-------|------------------------------------------------------------|
| I11.0 | Hypertensive heart disease with (congestive) heart failure |
| I13.0 | Hypertens heart and renal dis with (conges) heart failure  |
| I13.2 | Hyper heart and renal dis both (cong) heart and renal fail |
| I50   | Heart failure                                              |
| I50.0 | Congestive heart failure                                   |
| I50.1 | Left ventricular failure                                   |
| I50.9 | Heart failure, unspecified                                 |



## Cerebrovascular disease

| Medcode | Readterm                                                     |
|---------|--------------------------------------------------------------|
| 504     | Transient cerebral ischaemia                                 |
| 569     | Infarction - cerebral                                        |
| 1195    | Amaurosis fugax                                              |
| 1298    | CVA unspecified                                              |
| 1433    | Transient ischaemic attack                                   |
| 1469    | Stroke and cerebrovascular accident unspecified              |
| 1786    | Subarachnoid haemorrhage                                     |
| 1895    | Transient cerebral ischaemia NOS                             |
| 2156    | Stenosis, carotid artery                                     |
| 2418    | Cerebrovascular disease                                      |
| 2652    | Carotid artery stenosis                                      |
| 3149    | Cerebral infarction NOS                                      |
| 3535    | Intracerebral haemorrhage NOS                                |
| 3585    | Thrombosis lateral sinus                                     |
| 3979    | Hypertensive encephalopathy                                  |
| 4152    | Thrombosis, carotid artery                                   |
| 4240    | Carotid artery occlusion                                     |
| 4273    | Subdural haemorrhage - nontraumatic                          |
| 4635    | Cerebral aneurysm, nonruptured                               |
| 5051    | Intracerebral haemorrhage                                    |
| 5095    | Binswanger's disease                                         |
| 5184    | Precerebral atherosclerosis                                  |
| 5185    | Lateral medullary syndrome                                   |
| 5268    | Insufficiency - basilar artery                               |
| 5363    | CVA - cerebral artery occlusion                              |
| 5365    | Cerebral artery aneurysm operations                          |
| 5602    | Cerebellar infarction                                        |
| 5871    | H/O: stroke                                                  |
| 6116    | CVA - Cerebrovascular accident unspecified                   |
| 6155    | Stroke due to cerebral arterial occlusion                    |
| 6228    | Sequelae of stroke                                           |
| 6253    | Stroke unspecified                                           |
| 6305    | H/O: CVA                                                     |
| 6489    | Transient global amnesia                                     |
| 6960    | CVA - cerebrovascular accid due to intracerebral haemorrhage |
| 7138    | [V]Personal history of cerebrovascular accident (CVA)        |
| 7780    | Left sided CVA                                               |
| 7912    | Pontine haemorrhage                                          |
| 8443    | Brain stem stroke syndrome                                   |
| 8837    | Cerebral arterial occlusion                                  |

|       |                                                              |
|-------|--------------------------------------------------------------|
| 9696  | Subarachnoid haemorrhage from posterior communicating artery |
| 9943  | Cereb autosom dominant arteriop subcort infarcts leukoenceph |
| 9985  | Left sided cerebral infarction                               |
| 10062 | Cerebrovascular disease NOS                                  |
| 10189 | Cerebral amyloid angiopathy                                  |
| 10504 | Right sided cerebral infarction                              |
| 10625 | Clipping of aneurysm of cerebral artery                      |
| 11171 | Cerebral atherosclerosis                                     |
| 12555 | Generalised ischaemic cerebrovascular disease NOS            |
| 12833 | Right sided CVA                                              |
| 13564 | Cerebellar haemorrhage                                       |
| 13567 | H/O: TIA                                                     |
| 13577 | Other cerebrovascular disease                                |
| 13707 | Stroke / transient ischaemic attack referral                 |
| 15019 | Cerebral embolism                                            |
| 15252 | Brainstem infarction NOS                                     |
| 15788 | Transient cerebral ischaemia NOS                             |
| 16507 | Intermittent cerebral ischaemia                              |
| 16517 | Cerebral thrombosis                                          |
| 16554 | H/O sub-arachnoid haemorrhage                                |
| 17322 | Cerebellar stroke syndrome                                   |
| 17326 | Subarachnoid haemorrh from intracranial artery               |
| 17734 | Subdural haematoma - nontraumatic                            |
| 18604 | Stroke due to intracerebral haemorrhage                      |
| 18689 | Middle cerebral artery syndrome                              |
| 18996 | Transient global amnesia                                     |
| 19004 | TGA - Transient global amnesia                               |
| 19201 | Right sided intracerebral haemorrhage, unspecified           |
| 19260 | Posterior cerebral artery syndrome                           |
| 19280 | Anterior cerebral artery syndrome                            |
| 19348 | [V]Personal history of stroke                                |
| 19354 | Other transient cerebral ischaemia                           |
| 19412 | Subarachnoid haemorrhage from middle cerebral artery         |
| 20161 | Thrombosis of superior longitudinal sinus                    |
| 20284 | Intracranial haemorrhage NOS                                 |
| 21118 | Vertebro-basilar artery syndrome                             |
| 22006 | Thrombosis cavernous sinus                                   |
| 22018 | Dissection of cerebral arteries, nonruptured                 |
| 22400 | Cerebral arteritis                                           |
| 23361 | Late effects of cerebrovascular disease                      |
| 23580 | Subarachnoid haemorrhage NOS                                 |
| 23671 | Cerebral infarct due to thrombosis of precerebral arteries   |
| 23942 | Basilar artery syndrome                                      |

|       |                                                              |
|-------|--------------------------------------------------------------|
| 24385 | Chronic cerebral ischaemia                                   |
| 24424 | Congenital cerebral arteriovenous aneurysm                   |
| 24446 | Cerebral infarction due to embolism of precerebral arteries  |
| 25615 | Brainstem infarction                                         |
| 26424 | Infarction of basal ganglia                                  |
| 27975 | Cerebral infarction due to embolism of cerebral arteries     |
| 28278 | Transient global amnesia                                     |
| 28309 | Thrombosis transverse sinus                                  |
| 28314 | Left sided intracerebral haemorrhage, unspecified            |
| 29939 | Ruptured berry aneurysm                                      |
| 30045 | External capsule haemorrhage                                 |
| 30202 | Intracerebral haemorrhage                                    |
| 30502 | CVA prevention                                               |
| 31060 | Intracerebral haemorrhage in hemisphere, unspecified         |
| 31390 | Thrombosis of central nervous system venous sinuses          |
| 31595 | Cortical haemorrhage                                         |
| 31704 | Occlusion/stenosis cerebral arts not result cerebral infarct |
| 31805 | Other and unspecified intracranial haemorrhage               |
| 31941 | Rupture of syphilitic cerebral aneurysm                      |
| 32310 | Moyamoya disease                                             |
| 32447 | Basilar artery occlusion                                     |
| 33377 | Vertebral artery syndrome                                    |
| 33499 | Pure motor lacunar syndrome                                  |
| 33543 | Cerebrl infarctn due/unspcf occlusn or sten/cerebrl arts     |
| 34117 | Other cerebrovascular disease OS                             |
| 34135 | H/O: CVA/stroke                                              |
| 34758 | Cerebral embolus                                             |
| 36178 | Extradural haemorrhage - nontraumatic                        |
| 36717 | Cerebral infarction due to thrombosis of cerebral arteries   |
| 37493 | Other cerebrovascular disease NOS                            |
| 37947 | Nonpyogenic venous sinus thrombosis                          |
| 39344 | Cereb infarct due cerebral venous thrombosis, nonpyogenic    |
| 39403 | Sequelae of cerebral infarction                              |
| 40053 | Generalised ischaemic cerebrovascular disease NOS            |
| 40338 | Internal capsule haemorrhage                                 |
| 40758 | Cereb infarct due unsp occlus/stenos precerebr arteries      |
| 40847 | Vertebral artery occlusion                                   |
| 41180 | Thrombophlebitis of central nervous system venous sinuses    |
| 41577 | H/O: cerebrovascular disease                                 |
| 41910 | Subarachnoid haemorrhage from basilar artery                 |
| 42331 | Subarachnoid haemorrhage from anterior communicating artery  |
| 43451 | Sequelae of other nontraumatic intracranial haemorrhage      |
| 44740 | Sequelae of subarachnoid haemorrhage                         |

|       |                                                              |
|-------|--------------------------------------------------------------|
| 44765 | Carotid artery syndrome hemispheric                          |
| 45781 | Precerebral arterial occlusion                               |
| 46316 | Basal nucleus haemorrhage                                    |
| 47607 | CVA - cerebrovascular accident in the puerperium             |
| 47642 | Wallenberg syndrome                                          |
| 48149 | Sequelae of intracerebral haemorrhage                        |
| 49715 | Phlebitis and thrombophlebitis of intracranial sinuses       |
| 50594 | Multiple and bilateral precerebral artery syndromes          |
| 50725 | Listerial cerebral arteritis                                 |
| 51138 | Sequelae/other + unspecified cerebrovascular diseases        |
| 51311 | Other specified cerebrovascular disease                      |
| 51326 | Other precerebral artery occlusion                           |
| 51759 | Occlusion and stenosis of middle cerebral artery             |
| 51767 | Pure sensory lacunar syndrome                                |
| 53745 | [X]Other cerebral infarction                                 |
| 53810 | [X]Other intracerebral haemorrhage                           |
| 54744 | Cerebral degeneration due to cerebrovascular disease         |
| 55602 | Occlusion and stenosis of cerebellar arteries                |
| 55883 | Thrombophlebitis of cavernous sinus                          |
| 55885 | Embolism cavernous sinus                                     |
| 56007 | Subarachnoid haemorrhage from carotid siphon and bifurcation |
| 57315 | Intracerebral haemorrhage                                    |
| 57495 | Infarction - precerebral                                     |
| 57527 | Occlusion and stenosis of anterior cerebral artery           |
| 60692 | Subarachnoid haemorrhage from vertebral artery               |
| 61366 | Thrombosis of central nervous system venous sinus NOS        |
| 63746 | [X]Other transnt cerebral ischaemic attacks+related syndroms |
| 63830 | Stenosis of precerebral arteries                             |
| 65745 | [X]Other subarachnoid haemorrhage                            |
| 65770 | Occlusion and stenosis of posterior cerebral artery          |
| 65855 | Phlebitis or thrombophlebitis of CNS venous sinus NOS        |
| 66873 | H/O: Stroke in last year                                     |
| 68194 | Binswanger's encephalopathy                                  |
| 70455 | Thrombophlebitis of superior longitudinal venous sinus       |
| 70536 | Acute cerebrovascular insufficiency NOS                      |
| 71274 | Occlusion+stenosis of multiple and bilat cerebral arteries   |
| 71585 | Precerebral artery occlusion NOS                             |
| 73901 | [X]Cerebrovascular diseases                                  |
| 84404 | Embolism transverse sinus                                    |
| 90572 | [X]Occlusion and stenosis of other precerebral arteries      |
| 91627 | [X]Cerebrl infarctn due/unspcf occlusn or sten/cerebrl artr  |
| 92036 | [X]Occlusion and stenosis of other cerebral arteries         |
| 93459 | [X]Other lacunar syndromes                                   |

|        |                                                              |
|--------|--------------------------------------------------------------|
| 94482  | [X]Cereb infarct due unsp occlus/stenos precerebr arteries   |
| 95347  | [X]Other vascular syndroms/brain in cerebrovasculr diseases  |
| 96630  | [X]Intracerebral haemorrhage in hemisphere, unspecified      |
| 98188  | Small vessel cerebrovascular disease                         |
| 98642  | Multiple and bilateral precerebral arterial occlusion        |
| 99367  | [X]Other cerebrovascular disorders in diseases CE            |
| 100639 | Central post-stroke pain                                     |
| 101251 | [V]Personal history of transient ischaemic attack            |
| 101733 | Cerebral vein thrombosis                                     |
| 101824 | Adrenocortical haemorrhage                                   |
| 105202 | H/O amaurosis fugax                                          |
| 107440 | Lobar cerebral haemorrhage                                   |
| 107725 | Reversible cerebral vasoconstriction syndrome                |
| 108630 | [X]Subarachnoid haemorrh from intracranial artery, unspecif  |
| 108668 | [X]Subarachnoid haemorrhage from other intracranial arteries |
| 36568  | Embolism of central nervous system venous sinus              |
| 100015 | Transient ischaemic attack clinical management plan          |
| 18686  | Stroke/CVA annual review                                     |
| 55351  | Delivery of rehabilitation for stroke                        |
| 104505 | Stroke initial post discharge review                         |
| 105100 | Stroke 6 month review                                        |
| 107195 | Stroke self-management plan agreed                           |
| 107886 | Stroke annual review                                         |
| 109743 | Stroke self-management plan review                           |

| icd   | icd_description                                             |
|-------|-------------------------------------------------------------|
| G45   | Transient cerebral ischaemic attacks and related syndromes  |
| G45.0 | Vertebro-basilar artery syndrome                            |
| G45.1 | Carotid artery syndrome (hemispheric)                       |
| G45.2 | Multiple and bilateral precerebral artery syndromes         |
| G45.3 | Amaurosis fugax                                             |
| G45.4 | Transient global amnesia                                    |
| G45.8 | Other transient cerebral ischaemic attacks and related synd |
| G45.9 | Transient cerebral ischaemic attack, unspecified            |
| G46   | Vascular syndromes of brain in cerebrovascular diseases     |
| G46.0 | Middle cerebral artery syndrome                             |
| G46.1 | Anterior cerebral artery syndrome                           |
| G46.2 | Posterior cerebral artery syndrome                          |
| G46.3 | Brain stem stroke syndrome                                  |
| G46.4 | Cerebellar stroke syndrome                                  |
| G46.5 | Pure motor lacunar syndrome                                 |
| G46.6 | Pure sensory lacunar syndrome                               |

|       |                                                                                   |
|-------|-----------------------------------------------------------------------------------|
| G46.7 | Other lacunar syndromes                                                           |
| G46.8 | Other vascular syndromes of brain in cerebrovascular disease                      |
| I60   | Subarachnoid haemorrhage                                                          |
| I60.0 | Subarachnoid haemorrhage from carotid siphon and bifurcation                      |
| I60.1 | Subarachnoid haemorrhage from middle cerebral artery                              |
| I60.2 | Subarachnoid haemorrhage from anterior communicating artery                       |
| I60.3 | Subarachnoid haemorrhage from posterior communicating artery                      |
| I60.4 | Subarachnoid haemorrhage from basilar artery                                      |
| I60.5 | Subarachnoid haemorrhage from vertebral artery                                    |
| I60.6 | Subarachnoid haemorrhage from other intracranial arteries                         |
| I60.7 | Subarachnoid haemorrhage from intracranial artery, unspecified                    |
| I60.8 | Other subarachnoid haemorrhage                                                    |
| I60.9 | Subarachnoid haemorrhage, unspecified                                             |
| I61   | Intracerebral haemorrhage                                                         |
| I61.0 | Intracerebral haemorrhage in hemisphere, subcortical                              |
| I61.1 | Intracerebral haemorrhage in hemisphere, cortical                                 |
| I61.2 | Intracerebral haemorrhage in hemisphere, unspecified                              |
| I61.3 | Intracerebral haemorrhage in brain stem                                           |
| I61.4 | Intracerebral haemorrhage in cerebellum                                           |
| I61.5 | Intracerebral haemorrhage, intraventricular                                       |
| I61.6 | Intracerebral haemorrhage, multiple localized                                     |
| I61.8 | Other intracerebral haemorrhage                                                   |
| I61.9 | Intracerebral haemorrhage, unspecified                                            |
| I62   | Other nontraumatic intracranial haemorrhage                                       |
| I62.0 | Subdural haemorrhage (acute)(nontraumatic)                                        |
| I62.1 | Nontraumatic extradural haemorrhage                                               |
| I62.9 | Intracranial haemorrhage (nontraumatic), unspecified                              |
| I63   | Cerebral infarction                                                               |
| I63.0 | Cerebral infarct due to thrombosis of precerebral arteries                        |
| I63.1 | Cerebral infarction due to embolism of precerebral arteries                       |
| I63.2 | Cerebral infarct due to unspecified occlusion or stenosis of precerebral arteries |
| I63.3 | Cerebral infarction due to thrombosis of cerebral arteries                        |
| I63.4 | Cerebral infarction due to embolism of cerebral arteries                          |
| I63.5 | Cerebral infarct due to unspecified occlusion or stenosis of cerebral arteries    |
| I63.6 | Cerebral infarct due to cerebral venous thrombosis, nonpyogenic                   |
| I63.8 | Other cerebral infarction                                                         |
| I63.9 | Cerebral infarction, unspecified                                                  |
| I64   | Stroke, not specified as haemorrhage or infarction                                |
| I65   | Occlusion/stenosis of precerebral arteries not resulting in cerebral infarction   |
| I65.0 | Occlusion and stenosis of vertebral artery                                        |
| I65.1 | Occlusion and stenosis of basilar artery                                          |
| I65.2 | Occlusion and stenosis of carotid artery                                          |
| I65.3 | Occlusion and stenosis of multiple and bilateral precerebral arteries             |

|       |                                                              |
|-------|--------------------------------------------------------------|
| I65.8 | Occlusion and stenosis of other precerebral artery           |
| I65.9 | Occlusion and stenosis of unspecified precerebral artery     |
| I66   | Occlusion/stenosis cerebral arts not result cerebral infarct |
| I66.0 | Occlusion and stenosis of middle cerebral artery             |
| I66.1 | Occlusion and stenosis of anterior cerebral artery           |
| I66.2 | Occlusion and stenosis of posterior cerebral artery          |
| I66.3 | Occlusion and stenosis of cerebellar arteries                |
| I66.4 | Occlusion and stenosis of multiple and bilat cerebri arts    |
| I66.8 | Occlusion and stenosis of other cerebral artery              |
| I66.9 | Occlusion and stenosis of unspecified cerebral artery        |
| I67   | Other cerebrovascular diseases                               |
| I67.0 | Dissection of cerebral arteries, nonruptured                 |
| I67.1 | Cerebral aneurysm, nonruptured                               |
| I67.2 | Cerebral atherosclerosis                                     |
| I67.3 | Progressive vascular leukoencephalopathy                     |
| I67.4 | Hypertensive encephalopathy                                  |
| I67.5 | Moyamoya disease                                             |
| I67.6 | Nonpyogenic thrombosis of intracranial venous system         |
| I67.7 | Cerebral arteritis, not elsewhere classified                 |
| I67.8 | Other specified cerebrovascular diseases                     |
| I67.9 | Cerebrovascular disease, unspecified                         |
| I68   | Cerebrovascular disorders in diseases classified elsewhere   |
| I68.0 | Cerebral amyloid angiopathy                                  |
| I68.1 | Cerebral arteritis in infect & parasit dis classif elsewh    |
| I68.2 | Cerebral arteritis in other diseases classified elsewhere    |
| I68.8 | Other cerebrovascular disorders in diseases EC               |
| I69   | Sequelae of cerebrovascular disease                          |
| I69.0 | Sequelae of subarachnoid haemorrhage                         |
| I69.1 | Sequelae of intracerebral haemorrhage                        |
| I69.2 | Sequelae of other nontraumatic intracranial haemorrhage      |
| I69.3 | Sequelae of cerebral infarction                              |
| I69.4 | Sequelae of stroke, not spec as haemorrhage or infarction    |
| I69.8 | Sequelae of other and unspecified cerebrovascular diseases   |

## Terminal disease

| medcode | readterm                                                     |
|---------|--------------------------------------------------------------|
| 26353   | Terminal illness - late stage                                |
| 100660  | Last days of life                                            |
| 108509  | Palliative Care Outcomes Collaboration Assessment Toolkit    |
| 108547  | Palliative Care Problem Severity Score                       |
| 106667  | Prescription of palliative care anticipatory medication      |
| 6664    | Terminal care                                                |
| 106773  | End of life care                                             |
| 49651   | Specialist palliative care treatment - daycare               |
| 26354   | Specialist palliative care treatment - outpatient            |
| 18551   | Palliative treatment                                         |
| 12739   | On gold standards palliative care framework                  |
| 100607  | GSF supportive care stage 1 - advancing disease              |
| 100525  | GSF supportive care stage 2 - increasing decline             |
| 101636  | GSF supportv care stge 3 - last days: cat C - wks prognosis  |
| 100466  | GSF supportv care stge 3 - last days: cat D - days prognosis |
| 102415  | GSF supportv care stge 3 - last days: cat B - mth prognosis  |
| 105306  | GSF prognostic indicator stage B (green) - months prognosis  |
| 105314  | GSF prognostic indicator stage C (yellow) - weeks prognosis  |
| 105447  | GSF prognostic indicator stage D (red) - days prognosis      |
| 74909   | Liverpool care pathway for the dying                         |
| 106662  | Integrated care priorities for end of life                   |
| 99766   | Has end of life advance care plan                            |
| 109281  | End of life advance care plan                                |
| 104282  | On Liverpool care pathway for the dying                      |
| 105222  | End of life care pathway                                     |
| 9755    | Referral to palliative care service                          |
| 34531   | Refer for terminal care                                      |
| 22288   | Referred to community specialist palliative care team        |
| 103941  | Referral to community palliative care team declined          |
| 105961  | Patient held palliative care record                          |
| 105908  | Planned palliative oncology treatment                        |
| 106204  | Planned supportive care for terminal illness                 |
| 107583  | Current supportive care for terminal illness                 |
| 105975  | Current palliative oncology treatment                        |
| 6924    | DS 1500 Disability living allowance completed                |
| 105757  | Ambulance service notified of patient on EoL care register   |
| 105391  | Palliative care handover form completed                      |
| 100126  | On end of life care register                                 |
| 104463  | Under care of palliative care service                        |
| 105214  | Under care of palliative care specialist nurse               |



|        |                                                              |
|--------|--------------------------------------------------------------|
| 105877 | Under care of physician                                      |
| 106582 | Under care of palliative care physician                      |
| 7060   | [V]Palliative care                                           |
| 8976   | Terminal illness                                             |
| 29285  | Radiotherapy-tumour palliation                               |
| 103607 | Counselling for end of life issues                           |
| 98251  | Anticipatory palliative care                                 |
| 11318  | Community specialist palliative care                         |
| 10019  | Specialist palliative care                                   |
| 10784  | Specialist palliative care treatment - inpatient             |
| 97066  | Issue of palliative care anticipatory medication box         |
| 97280  | Issue of palliative care just in case box                    |
| 98521  | Management of multiple sclerosis in palliative phase         |
| 19458  | Palliative care plan review                                  |
| 103591 | GSF advance care plan discussion statement                   |
| 26352  | Refer to terminal care consult                               |
| 50291  | Discharged from community specialist palliative care team    |
| 106695 | Discharge from palliative care service                       |
| 73313  | Palliative medicine                                          |
| 98441  | Notif to primary care OOHS of palliative care plan in place  |
| 97051  | Palliative care - enhanced services administration           |
| 105508 | Healthcare prof would not be surprised (GSF surprise qu)     |
| 48775  | Under the care of community palliative care team             |
| 96936  | Seen by palliative care service                              |
| 103569 | Has end of life care pathway key general practitioner        |
| 105849 | Has end of life care pathway key nurse                       |
| 102536 | Has end of life care pathway key worker                      |
| 107660 | Consnt apoint persn LPA persn welfar (MCA 05) shar EoLCC rec |
| 9996   | Palliative care                                              |
| 28899  | Under care of palliative care physician                      |
| 13628  | Referral to palliative care physician                        |
| 11978  | Seen by palliative care physician                            |

| icd   | icd_description |
|-------|-----------------|
| Z51.5 | Palliative care |

























































































































|      |    |                                                           |   |   |   |   |   |   |   |   |   |   |   |   |   |   |   |   |   |
|------|----|-----------------------------------------------------------|---|---|---|---|---|---|---|---|---|---|---|---|---|---|---|---|---|
| 5387 | 7  | Chronic hepatitis unspecified                             | 0 | 0 | 0 | 0 | 0 | 0 | 0 | 0 | 1 | 0 | 0 | 0 | 0 | 0 | 0 | 0 | 0 |
| 5545 | 4  | Portal cirrhosis unspecified                              | 0 | 0 | 0 | 0 | 0 | 0 | 0 | 0 | 1 | 0 | 0 | 0 | 0 | 0 | 0 | 0 | 0 |
| 5818 | 4  | Indian childhood cirrhosis                                | 0 | 0 | 0 | 0 | 0 | 0 | 0 | 0 | 1 | 0 | 0 | 0 | 0 | 0 | 0 | 0 | 0 |
| 5863 | 0  | Biliary cirrhosis NOS                                     | 0 | 0 | 0 | 0 | 0 | 0 | 0 | 0 | 1 | 0 | 0 | 0 | 0 | 0 | 0 | 0 | 0 |
| 6010 | 4  | Hepatic sclerosis                                         | 0 | 0 | 0 | 0 | 0 | 0 | 0 | 0 | 1 | 0 | 0 | 0 | 0 | 0 | 0 | 0 | 0 |
| 6475 | 0  | Toxic liver disease with chronic lobular hepatitis        | 0 | 0 | 0 | 0 | 0 | 0 | 0 | 0 | 1 | 0 | 0 | 0 | 0 | 0 | 0 | 0 | 0 |
| 6653 | 4  | Chronic lobular hepatitis                                 | 0 | 0 | 0 | 0 | 0 | 0 | 0 | 0 | 1 | 0 | 0 | 0 | 0 | 0 | 0 | 0 | 0 |
| 6837 | 6  | Florid cirrhosis                                          | 0 | 0 | 0 | 0 | 0 | 0 | 0 | 0 | 1 | 0 | 0 | 0 | 0 | 0 | 0 | 0 | 0 |
| 6920 | 4  | Multilobular portal cirrhosis                             | 0 | 0 | 0 | 0 | 0 | 0 | 0 | 0 | 1 | 0 | 0 | 0 | 0 | 0 | 0 | 0 | 0 |
| 7145 | 3  | Hepatic fibrosis                                          | 0 | 0 | 0 | 0 | 0 | 0 | 0 | 0 | 1 | 0 | 0 | 0 | 0 | 0 | 0 | 0 | 0 |
| 7348 | 2  | Bacterial portal cirrhosis                                | 0 | 0 | 0 | 0 | 0 | 0 | 0 | 0 | 1 | 0 | 0 | 0 | 0 | 0 | 0 | 0 | 0 |
| 9159 | 1  | Biliary cirrhosis of children                             | 0 | 0 | 0 | 0 | 0 | 0 | 0 | 0 | 1 | 0 | 0 | 0 | 0 | 0 | 0 | 0 | 0 |
| 9290 | 9  | Hypertrophic portal cirrhosis                             | 0 | 0 | 0 | 0 | 0 | 0 | 0 | 0 | 1 | 0 | 0 | 0 | 0 | 0 | 0 | 0 | 0 |
| 9666 | 4  | Juvenile portal cirrhosis                                 | 0 | 0 | 0 | 0 | 0 | 0 | 0 | 0 | 1 | 0 | 0 | 0 | 0 | 0 | 0 | 0 | 0 |
| 9989 | 8  | Chronic hepatitis annual review - enhanced services admin | 0 | 0 | 0 | 0 | 0 | 0 | 0 | 0 | 1 | 0 | 0 | 0 | 0 | 0 | 0 | 0 | 0 |
| 1002 | 53 | Xanthomatous portal cirrhosis                             | 0 | 0 | 0 | 0 | 0 | 0 | 0 | 0 | 1 | 0 | 0 | 0 | 0 | 0 | 0 | 0 | 0 |
| 1004 | 74 | Laennec's cirrhosis                                       | 0 | 0 | 0 | 0 | 0 | 0 | 0 | 0 | 1 | 0 | 0 | 0 | 0 | 0 | 0 | 0 | 0 |
| 1005 | 92 | Hepatic fibrosis with hepatic sclerosis                   | 0 | 0 | 0 | 0 | 0 | 0 | 0 | 0 | 1 | 0 | 0 | 0 | 0 | 0 | 0 | 0 | 0 |
| 1029 | 22 | Cystic fibrosis related cirrhosis                         | 0 | 0 | 0 | 0 | 0 | 0 | 0 | 0 | 1 | 0 | 0 | 0 | 0 | 0 | 0 | 0 | 0 |
| 1034 | 66 | Fatty change of liver                                     | 0 | 0 | 0 | 0 | 0 | 0 | 0 | 0 | 1 | 0 | 0 | 0 | 0 | 0 | 0 | 0 | 0 |
| 1037 | 06 | Fatty liver                                               | 0 | 0 | 0 | 0 | 0 | 0 | 0 | 0 | 1 | 0 | 0 | 0 | 0 | 0 | 0 | 0 | 0 |
| 1060 | 25 | [X]Toxic liver disease, unspecified                       | 0 | 0 | 0 | 0 | 0 | 0 | 0 | 0 | 1 | 0 | 0 | 0 | 0 | 0 | 0 | 0 | 0 |
| 1066 | 42 | Chronic viral hepatitis B                                 | 0 | 0 | 0 | 0 | 0 | 0 | 0 | 0 | 1 | 0 | 0 | 0 | 0 | 0 | 0 | 0 | 0 |
| 1078 | 96 | [X]Chronic viral hepatitis, unspecified                   | 0 | 0 | 0 | 0 | 0 | 0 | 0 | 0 | 1 | 0 | 0 | 0 | 0 | 0 | 0 | 0 | 0 |



|      |                                                              |   |   |   |   |   |   |   |   |   |   |   |   |   |   |   |   |   |   |
|------|--------------------------------------------------------------|---|---|---|---|---|---|---|---|---|---|---|---|---|---|---|---|---|---|
| 1083 |                                                              | 0 |   |   |   |   |   |   |   |   |   |   |   |   |   |   |   |   |   |
| 43   | [X]Other chronic viral hepatitis                             |   | 0 | 0 | 0 | 0 | 0 | 0 | 0 | 1 | 0 | 0 | 0 | 0 | 0 | 0 | 0 | 0 | 0 |
| 1088 |                                                              | 0 |   |   |   |   |   |   |   |   |   |   |   |   |   |   |   |   |   |
| 00   | Liver abscess and chronic liver disease causing sequelae NOS |   | 0 | 0 | 0 | 0 | 0 | 0 | 0 | 1 | 0 | 0 | 0 | 0 | 0 | 0 | 0 | 0 | 0 |
| 1088 |                                                              | 0 |   |   |   |   |   |   |   |   |   |   |   |   |   |   |   |   |   |
| 19   | Congestive cirrhosis                                         |   | 0 | 0 | 0 | 0 | 0 | 0 | 0 | 1 | 0 | 0 | 0 | 0 | 0 | 0 | 0 | 0 | 0 |
| 1095 |                                                              | 0 |   |   |   |   |   |   |   |   |   |   |   |   |   |   |   |   |   |
| 40   | Zooparasitic portal cirrhosis                                | 0 |   |   |   |   |   |   |   | 1 | 0 | 0 | 0 | 0 | 0 | 0 | 0 | 0 | 0 |
| 3621 | O/E – diplegia                                               | 0 |   |   |   |   |   |   |   | 0 | 2 | 0 | 0 | 0 | 0 | 0 | 0 | 0 | 0 |
| 1027 |                                                              | 0 |   |   |   |   |   |   |   |   |   |   |   |   |   |   |   |   |   |
| 34   | O/E - paraplegic in extension                                |   | 0 | 0 | 0 | 0 | 0 | 0 | 0 | 0 | 2 | 0 | 0 | 0 | 0 | 0 | 0 | 0 | 0 |
| 8282 | O/E - quadriplegia                                           | 0 |   |   |   |   |   |   |   | 0 | 2 | 0 | 0 | 0 | 0 | 0 | 0 | 0 | 0 |
| 1749 | Hemiplegia                                                   | 0 |   |   |   |   |   |   |   | 0 | 2 | 0 | 0 | 0 | 0 | 0 | 0 | 0 | 0 |
| 4612 |                                                              | 0 |   |   |   |   |   |   |   |   |   |   |   |   |   |   |   |   |   |
| 8    | Flaccid tetraplegia                                          |   | 0 | 0 | 0 | 0 | 0 | 0 | 0 | 0 | 2 | 0 | 0 | 0 | 0 | 0 | 0 | 0 | 0 |
| 5537 |                                                              | 0 |   |   |   |   |   |   |   |   |   |   |   |   |   |   |   |   |   |
| 1    | O/E - paraplegic in flexion                                  |   | 0 | 0 | 0 | 0 | 0 | 0 | 0 | 0 | 2 | 0 | 0 | 0 | 0 | 0 | 0 | 0 | 0 |
| 8933 | Left hemiplegia                                              | 0 |   |   |   |   |   |   |   | 0 | 2 | 0 | 0 | 0 | 0 | 0 | 0 | 0 | 0 |
| 4617 |                                                              | 0 |   |   |   |   |   |   |   |   |   |   |   |   |   |   |   |   |   |
| 5    | Flaccid paraplegia                                           |   | 0 | 0 | 0 | 0 | 0 | 0 | 0 | 0 | 2 | 0 | 0 | 0 | 0 | 0 | 0 | 0 | 0 |
| 1611 |                                                              | 0 |   |   |   |   |   |   |   |   |   |   |   |   |   |   |   |   |   |
| 7    | Tetraplegia                                                  |   | 0 | 0 | 0 | 0 | 0 | 0 | 0 | 0 | 2 | 0 | 0 | 0 | 0 | 0 | 0 | 0 | 0 |
| 8492 | Hemiplegia NOS                                               | 0 |   |   |   |   |   |   |   | 0 | 2 | 0 | 0 | 0 | 0 | 0 | 0 | 0 | 0 |
| 3293 | Right hemiplegia                                             | 0 |   |   |   |   |   |   |   | 0 | 2 | 0 | 0 | 0 | 0 | 0 | 0 | 0 | 0 |
| 3613 |                                                              | 0 |   |   |   |   |   |   |   |   |   |   |   |   |   |   |   |   |   |
| 3    | O/E - paraplegia                                             |   | 0 | 0 | 0 | 0 | 0 | 0 | 0 | 0 | 2 | 0 | 0 | 0 | 0 | 0 | 0 | 0 | 0 |
| 3908 |                                                              | 0 |   |   |   |   |   |   |   |   |   |   |   |   |   |   |   |   |   |
| 5    | Flaccid hemiplegia                                           |   | 0 | 0 | 0 | 0 | 0 | 0 | 0 | 0 | 2 | 0 | 0 | 0 | 0 | 0 | 0 | 0 | 0 |
| 4040 |                                                              | 0 |   |   |   |   |   |   |   |   |   |   |   |   |   |   |   |   |   |
| 7    | O/E - hemiplegic posture                                     |   | 0 | 0 | 0 | 0 | 0 | 0 | 0 | 0 | 2 | 0 | 0 | 0 | 0 | 0 | 0 | 0 | 0 |
| 2213 |                                                              | 0 |   |   |   |   |   |   |   |   |   |   |   |   |   |   |   |   |   |
| 5    | O/E - hemiplegia                                             |   | 0 | 0 | 0 | 0 | 0 | 0 | 0 | 0 | 2 | 0 | 0 | 0 | 0 | 0 | 0 | 0 | 0 |
| 3063 | Paraplegia                                                   | 0 |   |   |   |   |   |   |   | 0 | 2 | 0 | 0 | 0 | 0 | 0 | 0 | 0 | 0 |
| 9271 | Quadriplegia                                                 | 0 |   |   |   |   |   |   |   | 0 | 2 | 0 | 0 | 0 | 0 | 0 | 0 | 0 | 0 |
| 5949 | Massive muscular calcification associated with paraplegia    | 0 |   |   |   |   |   |   |   | 0 | 2 | 0 | 0 | 0 | 0 | 0 | 0 | 0 | 0 |
| 4    |                                                              |   | 0 | 0 | 0 | 0 | 0 | 0 | 0 | 0 | 2 | 0 | 0 | 0 | 0 | 0 | 0 | 0 | 0 |
| 512  | Chronic renal failure                                        | 0 |   |   |   |   |   |   |   | 0 | 0 | 2 | 0 | 0 | 0 | 0 | 0 | 0 | 0 |
| 6712 | End stage renal failure                                      | 0 |   |   |   |   |   |   |   | 0 | 0 | 2 | 0 | 0 | 0 | 0 | 0 | 0 | 0 |
| 8330 | End-stage renal disease                                      | 0 |   |   |   |   |   |   |   | 0 | 0 | 2 | 0 | 0 | 0 | 0 | 0 | 0 | 0 |
| 1247 |                                                              | 0 |   |   |   |   |   |   |   |   |   |   |   |   |   |   |   |   |   |
| 9    | Chronic kidney disease stage 4                               |   | 0 | 0 | 0 | 0 | 0 | 0 | 0 | 0 | 0 | 2 | 0 | 0 | 0 | 0 | 0 | 0 | 0 |

|      |   |                                                     |   |   |   |   |   |   |   |   |   |   |   |   |   |   |   |   |   |
|------|---|-----------------------------------------------------|---|---|---|---|---|---|---|---|---|---|---|---|---|---|---|---|---|
| 1256 | 6 | Chronic kidney disease stage 3                      | 0 | 0 | 0 | 0 | 0 | 0 | 0 | 0 | 0 | 2 | 0 | 0 | 0 | 0 | 0 | 0 | 0 |
| 1258 | 5 | Chronic kidney disease stage 5                      | 0 | 0 | 0 | 0 | 0 | 0 | 0 | 0 | 0 | 2 | 0 | 0 | 0 | 0 | 0 | 0 | 0 |
| 1272 | 0 | Chronic renal impairment                            | 0 | 0 | 0 | 0 | 0 | 0 | 0 | 0 | 0 | 2 | 0 | 0 | 0 | 0 | 0 | 0 | 0 |
| 5385 | 2 | End stage renal failure                             | 0 | 0 | 0 | 0 | 0 | 0 | 0 | 0 | 0 | 2 | 0 | 0 | 0 | 0 | 0 | 0 | 0 |
| 8933 | 2 | predicted stage chronic kidney disease              | 0 | 0 | 0 | 0 | 0 | 0 | 0 | 0 | 0 | 2 | 0 | 0 | 0 | 0 | 0 | 0 | 0 |
| 9479 | 3 | Chronic kidney disease stage 3 with proteinuria     | 0 | 0 | 0 | 0 | 0 | 0 | 0 | 0 | 0 | 2 | 0 | 0 | 0 | 0 | 0 | 0 | 0 |
| 9496 | 5 | Chronic kidney disease stage 3A                     | 0 | 0 | 0 | 0 | 0 | 0 | 0 | 0 | 0 | 2 | 0 | 0 | 0 | 0 | 0 | 0 | 0 |
| 9512 | 1 | Chronic kidney disease stage 2 without proteinuria  | 0 | 0 | 0 | 0 | 0 | 0 | 0 | 0 | 0 | 2 | 0 | 0 | 0 | 0 | 0 | 0 | 0 |
| 9512 | 2 | Chronic kidney disease stage 4 with proteinuria     | 0 | 0 | 0 | 0 | 0 | 0 | 0 | 0 | 0 | 2 | 0 | 0 | 0 | 0 | 0 | 0 | 0 |
| 9512 | 3 | Chronic kidney disease stage 3 without proteinuria  | 0 | 0 | 0 | 0 | 0 | 0 | 0 | 0 | 0 | 2 | 0 | 0 | 0 | 0 | 0 | 0 | 0 |
| 9514 | 5 | CKD stage 3 with proteinuria                        | 0 | 0 | 0 | 0 | 0 | 0 | 0 | 0 | 0 | 2 | 0 | 0 | 0 | 0 | 0 | 0 | 0 |
| 9517 | 5 | Chronic kidney disease stage 3A without proteinuria | 0 | 0 | 0 | 0 | 0 | 0 | 0 | 0 | 0 | 2 | 0 | 0 | 0 | 0 | 0 | 0 | 0 |
| 9517 | 6 | CKD stage 3A without proteinuria                    | 0 | 0 | 0 | 0 | 0 | 0 | 0 | 0 | 0 | 2 | 0 | 0 | 0 | 0 | 0 | 0 | 0 |
| 9517 | 7 | Chronic kidney disease stage 3B without proteinuria | 0 | 0 | 0 | 0 | 0 | 0 | 0 | 0 | 0 | 2 | 0 | 0 | 0 | 0 | 0 | 0 | 0 |
| 9517 | 8 | Chronic kidney disease stage 3B with proteinuria    | 0 | 0 | 0 | 0 | 0 | 0 | 0 | 0 | 0 | 2 | 0 | 0 | 0 | 0 | 0 | 0 | 0 |
| 9517 | 9 | Chronic kidney disease stage 3B                     | 0 | 0 | 0 | 0 | 0 | 0 | 0 | 0 | 0 | 2 | 0 | 0 | 0 | 0 | 0 | 0 | 0 |
| 9518 | 0 | CKD stage 3B with proteinuria                       | 0 | 0 | 0 | 0 | 0 | 0 | 0 | 0 | 0 | 2 | 0 | 0 | 0 | 0 | 0 | 0 | 0 |
| 9518 | 8 | CKD stage 3 without proteinuria                     | 0 | 0 | 0 | 0 | 0 | 0 | 0 | 0 | 0 | 2 | 0 | 0 | 0 | 0 | 0 | 0 | 0 |
| 9540 | 5 | Chronic kidney disease stage 5 without proteinuria  | 0 | 0 | 0 | 0 | 0 | 0 | 0 | 0 | 0 | 2 | 0 | 0 | 0 | 0 | 0 | 0 | 0 |
| 9540 | 6 | Chronic kidney disease stage 4 without proteinuria  | 0 | 0 | 0 | 0 | 0 | 0 | 0 | 0 | 0 | 2 | 0 | 0 | 0 | 0 | 0 | 0 | 0 |
| 9540 | 8 | Chronic kidney disease stage 3A with proteinuria    | 0 | 0 | 0 | 0 | 0 | 0 | 0 | 0 | 0 | 2 | 0 | 0 | 0 | 0 | 0 | 0 | 0 |
| 9550 | 8 | Chronic kidney disease stage 5 with proteinuria     | 0 | 0 | 0 | 0 | 0 | 0 | 0 | 0 | 0 | 2 | 0 | 0 | 0 | 0 | 0 | 0 | 0 |
| 9557 | 1 | CKD stage 3A with proteinuria                       | 0 | 0 | 0 | 0 | 0 | 0 | 0 | 0 | 0 | 2 | 0 | 0 | 0 | 0 | 0 | 0 | 0 |
| 9758 | 7 | CKD stage 4 without proteinuria                     | 0 | 0 | 0 | 0 | 0 | 0 | 0 | 0 | 0 | 2 | 0 | 0 | 0 | 0 | 0 | 0 | 0 |

|      |    |                                                      |   |   |   |   |   |   |   |   |   |   |   |   |   |   |   |   |   |
|------|----|------------------------------------------------------|---|---|---|---|---|---|---|---|---|---|---|---|---|---|---|---|---|
| 9768 | 3  | CKD stage 5 without proteinuria                      | 0 | 0 | 0 | 0 | 0 | 0 | 0 | 0 | 0 | 0 | 2 | 0 | 0 | 0 | 0 | 0 | 0 |
| 9916 | 0  | CKD stage 5 with proteinuria                         | 0 | 0 | 0 | 0 | 0 | 0 | 0 | 0 | 0 | 0 | 2 | 0 | 0 | 0 | 0 | 0 | 0 |
| 9931 | 2  | CKD stage 4 with proteinuria                         | 0 | 0 | 0 | 0 | 0 | 0 | 0 | 0 | 0 | 0 | 2 | 0 | 0 | 0 | 0 | 0 | 0 |
| 1006 | 33 | CKD stage 3B without proteinuria                     | 0 | 0 | 0 | 0 | 0 | 0 | 0 | 0 | 0 | 0 | 2 | 0 | 0 | 0 | 0 | 0 | 0 |
| 1051 | 51 | chronic kidney disease stage 5                       | 0 | 0 | 0 | 0 | 0 | 0 | 0 | 0 | 0 | 0 | 2 | 0 | 0 | 0 | 0 | 0 | 0 |
| 2994 |    | Peritoneal dialysis                                  | 0 | 0 | 0 | 0 | 0 | 0 | 0 | 0 | 0 | 0 | 2 | 0 | 0 | 0 | 0 | 0 | 0 |
| 2995 |    | Acquired arteriovenous fistula                       | 0 | 0 | 0 | 0 | 0 | 0 | 0 | 0 | 0 | 0 | 2 | 0 | 0 | 0 | 0 | 0 | 0 |
| 2996 |    | Haemodialysis NEC                                    | 0 | 0 | 0 | 0 | 0 | 0 | 0 | 0 | 0 | 0 | 2 | 0 | 0 | 0 | 0 | 0 | 0 |
| 3205 |    | Creation of arteriovenous fistula NEC                | 0 | 0 | 0 | 0 | 0 | 0 | 0 | 0 | 0 | 0 | 2 | 0 | 0 | 0 | 0 | 0 | 0 |
| 8037 |    | Insertion of ambulatory peritoneal dialysis catheter | 0 | 0 | 0 | 0 | 0 | 0 | 0 | 0 | 0 | 0 | 2 | 0 | 0 | 0 | 0 | 0 | 0 |
| 9765 |    | Ligation of acquired arteriovenous fistula           | 0 | 0 | 0 | 0 | 0 | 0 | 0 | 0 | 0 | 0 | 2 | 0 | 0 | 0 | 0 | 0 | 0 |
| 1177 | 3  | Dialysis for renal failure                           | 0 | 0 | 0 | 0 | 0 | 0 | 0 | 0 | 0 | 0 | 2 | 0 | 0 | 0 | 0 | 0 | 0 |
| 1877 | 9  | Repair of acquired arteriovenous fistula             | 0 | 0 | 0 | 0 | 0 | 0 | 0 | 0 | 0 | 0 | 2 | 0 | 0 | 0 | 0 | 0 | 0 |
| 2007 | 3  | Renal dialysis                                       | 0 | 0 | 0 | 0 | 0 | 0 | 0 | 0 | 0 | 0 | 2 | 0 | 0 | 0 | 0 | 0 | 0 |
| 2019 | 6  | H/O: renal dialysis                                  | 0 | 0 | 0 | 0 | 0 | 0 | 0 | 0 | 0 | 0 | 2 | 0 | 0 | 0 | 0 | 0 | 0 |
| 2225 | 2  | [V]Renal dialysis status                             | 0 | 0 | 0 | 0 | 0 | 0 | 0 | 0 | 0 | 0 | 2 | 0 | 0 | 0 | 0 | 0 | 0 |
| 2377 | 3  | Removal of ambulatory peritoneal dialysis catheter   | 0 | 0 | 0 | 0 | 0 | 0 | 0 | 0 | 0 | 0 | 2 | 0 | 0 | 0 | 0 | 0 | 0 |
| 2415 | 1  | Arteriovenous shunt                                  | 0 | 0 | 0 | 0 | 0 | 0 | 0 | 0 | 0 | 0 | 2 | 0 | 0 | 0 | 0 | 0 | 0 |
| 2552 | 1  | Creation of brachial-cephalic fistula                | 0 | 0 | 0 | 0 | 0 | 0 | 0 | 0 | 0 | 0 | 2 | 0 | 0 | 0 | 0 | 0 | 0 |
| 2815 | 8  | Kidney dialysis with complication without blame      | 0 | 0 | 0 | 0 | 0 | 0 | 0 | 0 | 0 | 0 | 2 | 0 | 0 | 0 | 0 | 0 | 0 |
| 2826 | 9  | Creation of radial-cephalic fistula                  | 0 | 0 | 0 | 0 | 0 | 0 | 0 | 0 | 0 | 0 | 2 | 0 | 0 | 0 | 0 | 0 | 0 |
| 3070 | 9  | Insertion of temporary peritoneal dialysis catheter  | 0 | 0 | 0 | 0 | 0 | 0 | 0 | 0 | 0 | 0 | 2 | 0 | 0 | 0 | 0 | 0 | 0 |
| 3075 | 6  | Continuous ambulatory peritoneal dialysis            | 0 | 0 | 0 | 0 | 0 | 0 | 0 | 0 | 0 | 0 | 2 | 0 | 0 | 0 | 0 | 0 | 0 |
| 3147 | 8  | Removal of infected arteriovenous shunt              | 0 | 0 | 0 | 0 | 0 | 0 | 0 | 0 | 0 | 0 | 2 | 0 | 0 | 0 | 0 | 0 | 0 |
| 3154 | 9  | Compensation for renal failure                       | 0 | 0 | 0 | 0 | 0 | 0 | 0 | 0 | 0 | 0 | 2 | 0 | 0 | 0 | 0 | 0 | 0 |

|      |   |                                                              |   |   |   |   |   |   |   |   |   |   |   |   |   |   |   |   |   |
|------|---|--------------------------------------------------------------|---|---|---|---|---|---|---|---|---|---|---|---|---|---|---|---|---|
| 3592 | 1 | Failure of sterile precautions during perfusion              | 0 | 0 | 0 | 0 | 0 | 0 | 0 | 0 | 0 | 0 | 2 | 0 | 0 | 0 | 0 | 0 | 0 |
| 3644 | 2 | Placement ambulatory dialysis apparatus - compens renal fail | 0 | 0 | 0 | 0 | 0 | 0 | 0 | 0 | 0 | 0 | 2 | 0 | 0 | 0 | 0 | 0 | 0 |
| 4442 | 2 | H/O: kidney dialysis                                         | 0 | 0 | 0 | 0 | 0 | 0 | 0 | 0 | 0 | 0 | 2 | 0 | 0 | 0 | 0 | 0 | 0 |
| 4516 | 0 | [V]Aftercare involving peritoneal dialysis                   | 0 | 0 | 0 | 0 | 0 | 0 | 0 | 0 | 0 | 0 | 2 | 0 | 0 | 0 | 0 | 0 | 0 |
| 4614 | 5 | [V]Aftercare involving renal dialysis NOS                    | 0 | 0 | 0 | 0 | 0 | 0 | 0 | 0 | 0 | 0 | 2 | 0 | 0 | 0 | 0 | 0 | 0 |
| 4643 | 8 | [X] Peritoneal dialysis associated peritonitis               | 0 | 0 | 0 | 0 | 0 | 0 | 0 | 0 | 0 | 0 | 2 | 0 | 0 | 0 | 0 | 0 | 0 |
| 4802 | 2 | Other specified compensation for renal failure               | 0 | 0 | 0 | 0 | 0 | 0 | 0 | 0 | 0 | 0 | 2 | 0 | 0 | 0 | 0 | 0 | 0 |
| 4863 | 9 | Mechanical complication of dialysis catheter                 | 0 | 0 | 0 | 0 | 0 | 0 | 0 | 0 | 0 | 0 | 2 | 0 | 0 | 0 | 0 | 0 | 0 |
| 4871 | 3 | mechanical complication of arterio-venous surgical fistula   | 0 | 0 | 0 | 0 | 0 | 0 | 0 | 0 | 0 | 0 | 2 | 0 | 0 | 0 | 0 | 0 | 0 |
| 4902 | 8 | h/o: kidney recipient                                        | 0 | 0 | 0 | 0 | 0 | 0 | 0 | 0 | 0 | 0 | 2 | 0 | 0 | 0 | 0 | 0 | 0 |
| 5208 | 8 | [V]Preparatory care for dialysis                             | 0 | 0 | 0 | 0 | 0 | 0 | 0 | 0 | 0 | 0 | 2 | 0 | 0 | 0 | 0 | 0 | 0 |
| 5484 | 4 | [X]Failure sterile precautions dur kidney dialys/other perf  | 0 | 0 | 0 | 0 | 0 | 0 | 0 | 0 | 0 | 0 | 2 | 0 | 0 | 0 | 0 | 0 | 0 |
| 5676 | 0 | Placement ambulatory apparatus compensation renal failure    | 0 | 0 | 0 | 0 | 0 | 0 | 0 | 0 | 0 | 0 | 2 | 0 | 0 | 0 | 0 | 0 | 0 |
| 5861 | 8 | Arteriovenous shunt NOS                                      | 0 | 0 | 0 | 0 | 0 | 0 | 0 | 0 | 0 | 0 | 2 | 0 | 0 | 0 | 0 | 0 | 0 |
| 5919 | 4 | Placement ambulatory apparatus- compensate renal failure OS  | 0 | 0 | 0 | 0 | 0 | 0 | 0 | 0 | 0 | 0 | 2 | 0 | 0 | 0 | 0 | 0 | 0 |
| 5931 | 5 | Stenosis of arteriovenous dialysis fistula                   | 0 | 0 | 0 | 0 | 0 | 0 | 0 | 0 | 0 | 0 | 2 | 0 | 0 | 0 | 0 | 0 | 0 |
| 6030 | 2 | Creation of graft fistula for dialysis                       | 0 | 0 | 0 | 0 | 0 | 0 | 0 | 0 | 0 | 0 | 2 | 0 | 0 | 0 | 0 | 0 | 0 |
| 6044 | 6 | Care of haemodialysis equipment                              | 0 | 0 | 0 | 0 | 0 | 0 | 0 | 0 | 0 | 0 | 2 | 0 | 0 | 0 | 0 | 0 | 0 |
| 6049 | 8 | Reversing haemodialysis lines                                | 0 | 0 | 0 | 0 | 0 | 0 | 0 | 0 | 0 | 0 | 2 | 0 | 0 | 0 | 0 | 0 | 0 |
| 6074 | 3 | [V]Aftercare involving intermittent dialysis                 | 0 | 0 | 0 | 0 | 0 | 0 | 0 | 0 | 0 | 0 | 2 | 0 | 0 | 0 | 0 | 0 | 0 |
| 6303 | 8 | [V]Unspecified aftercare involving intermittent dialysis     | 0 | 0 | 0 | 0 | 0 | 0 | 0 | 0 | 0 | 0 | 2 | 0 | 0 | 0 | 0 | 0 | 0 |
| 6306 | 3 | Insertion of arteriovenous prosthesis                        | 0 | 0 | 0 | 0 | 0 | 0 | 0 | 0 | 0 | 0 | 2 | 0 | 0 | 0 | 0 | 0 | 0 |
| 6319 | 0 | Attention to arteriovenous shunt                             | 0 | 0 | 0 | 0 | 0 | 0 | 0 | 0 | 0 | 0 | 2 | 0 | 0 | 0 | 0 | 0 | 0 |
| 6330 | 5 | Thrombectomy of arteriovenous fistula                        | 0 | 0 | 0 | 0 | 0 | 0 | 0 | 0 | 0 | 0 | 2 | 0 | 0 | 0 | 0 | 0 | 0 |

|            |                                                              |   |   |   |   |   |   |   |   |   |   |   |   |   |   |   |   |   |   |
|------------|--------------------------------------------------------------|---|---|---|---|---|---|---|---|---|---|---|---|---|---|---|---|---|---|
| 6348<br>8  | [V]Other specified aftercare involving intermittent dialysis | 0 | 0 | 0 | 0 | 0 | 0 | 0 | 0 | 0 | 0 | 2 | 0 | 0 | 0 | 0 | 0 | 0 | 0 |
| 6350<br>2  | Peritoneal dialysis bag procedure                            | 0 | 0 | 0 | 0 | 0 | 0 | 0 | 0 | 0 | 0 | 2 | 0 | 0 | 0 | 0 | 0 | 0 | 0 |
| 6463<br>6  | Compensation for renal failure NOS                           | 0 | 0 | 0 | 0 | 0 | 0 | 0 | 0 | 0 | 0 | 2 | 0 | 0 | 0 | 0 | 0 | 0 | 0 |
| 6482<br>8  | Peritoneal dialysis NEC                                      | 0 | 0 | 0 | 0 | 0 | 0 | 0 | 0 | 0 | 0 | 2 | 0 | 0 | 0 | 0 | 0 | 0 | 0 |
| 6508<br>9  | Placement other apparatus- compensate for renal failure NOS  | 0 | 0 | 0 | 0 | 0 | 0 | 0 | 0 | 0 | 0 | 2 | 0 | 0 | 0 | 0 | 0 | 0 | 0 |
| 6539<br>8  | Other specified arteriovenous shunt                          | 0 | 0 | 0 | 0 | 0 | 0 | 0 | 0 | 0 | 0 | 2 | 0 | 0 | 0 | 0 | 0 | 0 | 0 |
| 6671<br>4  | Renal dialysis with complication without blame               | 0 | 0 | 0 | 0 | 0 | 0 | 0 | 0 | 0 | 0 | 2 | 0 | 0 | 0 | 0 | 0 | 0 | 0 |
| 6926<br>6  | Failure of sterile precautions during kidney dialysis        | 0 | 0 | 0 | 0 | 0 | 0 | 0 | 0 | 0 | 0 | 2 | 0 | 0 | 0 | 0 | 0 | 0 | 0 |
| 6942<br>7  | Accid cut puncture perf h'ge - perfusion NOS                 | 0 | 0 | 0 | 0 | 0 | 0 | 0 | 0 | 0 | 0 | 2 | 0 | 0 | 0 | 0 | 0 | 0 | 0 |
| 6976<br>0  | [X]Other dialysis                                            | 0 | 0 | 0 | 0 | 0 | 0 | 0 | 0 | 0 | 0 | 2 | 0 | 0 | 0 | 0 | 0 | 0 | 0 |
| 7112<br>4  | Haemofiltration                                              | 0 | 0 | 0 | 0 | 0 | 0 | 0 | 0 | 0 | 0 | 2 | 0 | 0 | 0 | 0 | 0 | 0 | 0 |
| 7233<br>6  | Priming haemodialysis lines                                  | 0 | 0 | 0 | 0 | 0 | 0 | 0 | 0 | 0 | 0 | 2 | 0 | 0 | 0 | 0 | 0 | 0 | 0 |
| 7490<br>5  | Haemodialysis training                                       | 0 | 0 | 0 | 0 | 0 | 0 | 0 | 0 | 0 | 0 | 2 | 0 | 0 | 0 | 0 | 0 | 0 | 0 |
| 8351<br>3  | Placement other apparatus for compensation for renal failure | 0 | 0 | 0 | 0 | 0 | 0 | 0 | 0 | 0 | 0 | 2 | 0 | 0 | 0 | 0 | 0 | 0 | 0 |
| 8641<br>9  | dialysis fluid glucose level                                 | 0 | 0 | 0 | 0 | 0 | 0 | 0 | 0 | 0 | 0 | 2 | 0 | 0 | 0 | 0 | 0 | 0 | 0 |
| 8859<br>7  | Automated peritoneal dialysis                                | 0 | 0 | 0 | 0 | 0 | 0 | 0 | 0 | 0 | 0 | 2 | 0 | 0 | 0 | 0 | 0 | 0 | 0 |
| 9613<br>1  | Banding of arteriovenous fistula                             | 0 | 0 | 0 | 0 | 0 | 0 | 0 | 0 | 0 | 0 | 2 | 0 | 0 | 0 | 0 | 0 | 0 | 0 |
| 9618<br>4  | Accid cut puncture perf h'ge - kidney dialysis               | 0 | 0 | 0 | 0 | 0 | 0 | 0 | 0 | 0 | 0 | 2 | 0 | 0 | 0 | 0 | 0 | 0 | 0 |
| 9634<br>7  | Ligation of arteriovenous dialysis fistula                   | 0 | 0 | 0 | 0 | 0 | 0 | 0 | 0 | 0 | 0 | 2 | 0 | 0 | 0 | 0 | 0 | 0 | 0 |
| 9888<br>8  | peritoneal dialysis sample                                   | 0 | 0 | 0 | 0 | 0 | 0 | 0 | 0 | 0 | 0 | 2 | 0 | 0 | 0 | 0 | 0 | 0 | 0 |
| 9969<br>2  | [v]aftercare involving extracorporeal dialysis               | 0 | 0 | 0 | 0 | 0 | 0 | 0 | 0 | 0 | 0 | 2 | 0 | 0 | 0 | 0 | 0 | 0 | 0 |
| 1002<br>35 | Ligation of acquired arteriovenous fistula                   | 0 | 0 | 0 | 0 | 0 | 0 | 0 | 0 | 0 | 0 | 2 | 0 | 0 | 0 | 0 | 0 | 0 | 0 |
| 1011<br>24 | continuous ambulatory peritoneal dialysis associated perit   | 0 | 0 | 0 | 0 | 0 | 0 | 0 | 0 | 0 | 0 | 2 | 0 | 0 | 0 | 0 | 0 | 0 | 0 |
| 1017<br>36 | dialysis fluid urea level                                    | 0 | 0 | 0 | 0 | 0 | 0 | 0 | 0 | 0 | 0 | 2 | 0 | 0 | 0 | 0 | 0 | 0 | 0 |

|      |                                                           |   |   |   |   |   |   |   |   |   |   |   |   |   |   |   |   |   |   |
|------|-----------------------------------------------------------|---|---|---|---|---|---|---|---|---|---|---|---|---|---|---|---|---|---|
| 1017 |                                                           | 0 |   |   |   |   |   |   |   |   |   |   |   |   |   |   |   |   |   |
| 56   | Thomas intravascular shunt for dialysis                   |   | 0 | 0 | 0 | 0 | 0 | 0 | 0 | 0 | 0 | 2 | 0 | 0 | 0 | 0 | 0 | 0 | 0 |
| 1019 |                                                           | 0 |   |   |   |   |   |   |   |   |   |   |   |   |   |   |   |   |   |
| 12   | dialysis training                                         |   | 0 | 0 | 0 | 0 | 0 | 0 | 0 | 0 | 0 | 2 | 0 | 0 | 0 | 0 | 0 | 0 | 0 |
| 1045 |                                                           | 0 |   |   |   |   |   |   |   |   |   |   |   |   |   |   |   |   |   |
| 86   | flushing of peritoneal dialysis catheter                  |   | 0 | 0 | 0 | 0 | 0 | 0 | 0 | 0 | 0 | 2 | 0 | 0 | 0 | 0 | 0 | 0 | 0 |
| 1047 |                                                           | 0 |   |   |   |   |   |   |   |   |   |   |   |   |   |   |   |   |   |
| 19   | peritoneal dialysis training                              |   | 0 | 0 | 0 | 0 | 0 | 0 | 0 | 0 | 0 | 2 | 0 | 0 | 0 | 0 | 0 | 0 | 0 |
| 1054 |                                                           | 0 |   |   |   |   |   |   |   |   |   |   |   |   |   |   |   |   |   |
| 36   | anaphylactoid reaction due to haemodialysis               |   | 0 | 0 | 0 | 0 | 0 | 0 | 0 | 0 | 0 | 2 | 0 | 0 | 0 | 0 | 0 | 0 | 0 |
| 1057 |                                                           | 0 |   |   |   |   |   |   |   |   |   |   |   |   |   |   |   |   |   |
| 42   | aneurysm of anastomotic site of dialysis av fistula       |   | 0 | 0 | 0 | 0 | 0 | 0 | 0 | 0 | 0 | 2 | 0 | 0 | 0 | 0 | 0 | 0 | 0 |
| 1057 |                                                           | 0 |   |   |   |   |   |   |   |   |   |   |   |   |   |   |   |   |   |
| 60   | ruptured aneurysm of dialysis vascular access             |   | 0 | 0 | 0 | 0 | 0 | 0 | 0 | 0 | 0 | 2 | 0 | 0 | 0 | 0 | 0 | 0 | 0 |
| 1067 |                                                           | 0 |   |   |   |   |   |   |   |   |   |   |   |   |   |   |   |   |   |
| 20   | thrombosis of dialysis arteriovenous fistula              |   | 0 | 0 | 0 | 0 | 0 | 0 | 0 | 0 | 0 | 2 | 0 | 0 | 0 | 0 | 0 | 0 | 0 |
| 1069 |                                                           | 0 |   |   |   |   |   |   |   |   |   |   |   |   |   |   |   |   |   |
| 75   | haemorrhage of dialysis arteriovenous fistula             |   | 0 | 0 | 0 | 0 | 0 | 0 | 0 | 0 | 0 | 2 | 0 | 0 | 0 | 0 | 0 | 0 | 0 |
| 1070 |                                                           | 0 |   |   |   |   |   |   |   |   |   |   |   |   |   |   |   |   |   |
| 82   | occlusion of dialysis arteriovenous fistula               |   | 0 | 0 | 0 | 0 | 0 | 0 | 0 | 0 | 0 | 2 | 0 | 0 | 0 | 0 | 0 | 0 | 0 |
| 1071 |                                                           | 0 |   |   |   |   |   |   |   |   |   |   |   |   |   |   |   |   |   |
| 88   | aneurysm of dialysis arteriovenous fistula                |   | 0 | 0 | 0 | 0 | 0 | 0 | 0 | 0 | 0 | 2 | 0 | 0 | 0 | 0 | 0 | 0 | 0 |
| 1072 |                                                           | 0 |   |   |   |   |   |   |   |   |   |   |   |   |   |   |   |   |   |
| 17   | arteriovenous fistula thrombosis                          |   | 0 | 0 | 0 | 0 | 0 | 0 | 0 | 0 | 0 | 2 | 0 | 0 | 0 | 0 | 0 | 0 | 0 |
| 1072 |                                                           | 0 |   |   |   |   |   |   |   |   |   |   |   |   |   |   |   |   |   |
| 20   | aneurysm of needle site of dialysis arteriovenous fistula |   | 0 | 0 | 0 | 0 | 0 | 0 | 0 | 0 | 0 | 2 | 0 | 0 | 0 | 0 | 0 | 0 | 0 |
| 1072 |                                                           | 0 |   |   |   |   |   |   |   |   |   |   |   |   |   |   |   |   |   |
| 60   | infection of dialysis arteriovenous fistula               |   | 0 | 0 | 0 | 0 | 0 | 0 | 0 | 0 | 0 | 2 | 0 | 0 | 0 | 0 | 0 | 0 | 0 |
| 1077 |                                                           | 0 |   |   |   |   |   |   |   |   |   |   |   |   |   |   |   |   |   |
| 19   | ligation of arteriovenous dialysis graft                  |   | 0 | 0 | 0 | 0 | 0 | 0 | 0 | 0 | 0 | 2 | 0 | 0 | 0 | 0 | 0 | 0 | 0 |
| 1077 |                                                           | 0 |   |   |   |   |   |   |   |   |   |   |   |   |   |   |   |   |   |
| 46   | stenosis of dialysis vascular access                      |   | 0 | 0 | 0 | 0 | 0 | 0 | 0 | 0 | 0 | 2 | 0 | 0 | 0 | 0 | 0 | 0 | 0 |
| 1079 |                                                           | 0 |   |   |   |   |   |   |   |   |   |   |   |   |   |   |   |   |   |
| 00   | disorders associated with peritoneal dialysis             |   | 0 | 0 | 0 | 0 | 0 | 0 | 0 | 0 | 0 | 2 | 0 | 0 | 0 | 0 | 0 | 0 | 0 |
| 1081 |                                                           | 0 |   |   |   |   |   |   |   |   |   |   |   |   |   |   |   |   |   |
| 16   | occlusion of dialysis vascular access                     |   | 0 | 0 | 0 | 0 | 0 | 0 | 0 | 0 | 0 | 2 | 0 | 0 | 0 | 0 | 0 | 0 | 0 |
| 1082 |                                                           | 0 |   |   |   |   |   |   |   |   |   |   |   |   |   |   |   |   |   |
| 13   | infection of dialysis arteriovenous graft                 |   | 0 | 0 | 0 | 0 | 0 | 0 | 0 | 0 | 0 | 2 | 0 | 0 | 0 | 0 | 0 | 0 | 0 |
| 1084 |                                                           | 0 |   |   |   |   |   |   |   |   |   |   |   |   |   |   |   |   |   |
| 23   | rupture of dialysis arteriovenous graft                   |   | 0 | 0 | 0 | 0 | 0 | 0 | 0 | 0 | 0 | 2 | 0 | 0 | 0 | 0 | 0 | 0 | 0 |
| 1692 |                                                           | 0 |   |   |   |   |   |   |   |   |   |   |   |   |   |   |   |   |   |
| 9    | Anaemia secondary to renal failure                        |   | 0 | 0 | 0 | 0 | 0 | 0 | 0 | 0 | 0 | 2 | 0 | 0 | 0 | 0 | 0 | 0 | 0 |
| 2539 |                                                           | 0 |   |   |   |   |   |   |   |   |   |   |   |   |   |   |   |   |   |
| 4    | Anaemia secondary to chronic renal failure                |   | 0 | 0 | 0 | 0 | 0 | 0 | 0 | 0 | 0 | 2 | 0 | 0 | 0 | 0 | 0 | 0 | 0 |
| 2868 |                                                           | 0 |   |   |   |   |   |   |   |   |   |   |   |   |   |   |   |   |   |
| 4    | Hypertensive heart and renal disease with renal failure   |   | 0 | 0 | 0 | 0 | 0 | 0 | 0 | 0 | 0 | 2 | 0 | 0 | 0 | 0 | 0 | 0 | 0 |
| 3242 |                                                           | 0 |   |   |   |   |   |   |   |   |   |   |   |   |   |   |   |   |   |
| 3    | Hypertensive renal disease with renal failure             |   | 0 | 0 | 0 | 0 | 0 | 0 | 0 | 0 | 0 | 2 | 0 | 0 | 0 | 0 | 0 | 0 | 0 |

|      |                                                             |   |   |   |   |   |   |   |   |   |   |   |   |   |   |   |   |   |   |
|------|-------------------------------------------------------------|---|---|---|---|---|---|---|---|---|---|---|---|---|---|---|---|---|---|
| 5394 |                                                             | 0 |   |   |   |   |   |   |   |   |   |   |   |   |   |   |   |   |   |
| 0    | [X]Other chronic renal failure                              | 0 | 0 | 0 | 0 | 0 | 0 | 0 | 0 | 0 | 0 | 2 | 0 | 0 | 0 | 0 | 0 | 0 | 0 |
| 1079 |                                                             | 0 |   |   |   |   |   |   |   |   |   |   |   |   |   |   |   |   |   |
| 01   | placement other apparatus- compensate for renal failure os  | 0 | 0 | 0 | 0 | 0 | 0 | 0 | 0 | 0 | 0 | 2 | 0 | 0 | 0 | 0 | 0 | 0 | 0 |
| 7071 |                                                             | 0 |   |   |   |   |   |   |   |   |   |   |   |   |   |   |   |   |   |
| 2    | det.ren.func.after ren.transpl                              | 0 | 0 | 0 | 0 | 0 | 0 | 0 | 0 | 0 | 0 | 2 | 0 | 0 | 0 | 0 | 0 | 0 | 0 |
| 7200 |                                                             | 0 |   |   |   |   |   |   |   |   |   |   |   |   |   |   |   |   |   |
| 4    | Excision of rejected transplanted kidney                    | 0 | 0 | 0 | 0 | 0 | 0 | 0 | 0 | 0 | 0 | 2 | 0 | 0 | 0 | 0 | 0 | 0 | 0 |
| 9336 |                                                             | 0 |   |   |   |   |   |   |   |   |   |   |   |   |   |   |   |   |   |
| 6    | Interventions associated with transplantation of kidney     | 0 | 0 | 0 | 0 | 0 | 0 | 0 | 0 | 0 | 0 | 2 | 0 | 0 | 0 | 0 | 0 | 0 | 0 |
| 1034 |                                                             | 0 |   |   |   |   |   |   |   |   |   |   |   |   |   |   |   |   |   |
| 29   | post-transplantation of kidney examination, recipient       | 0 | 0 | 0 | 0 | 0 | 0 | 0 | 0 | 0 | 0 | 2 | 0 | 0 | 0 | 0 | 0 | 0 | 0 |
| 1036 |                                                             | 0 |   |   |   |   |   |   |   |   |   |   |   |   |   |   |   |   |   |
| 49   | transplantation surgery                                     | 0 | 0 | 0 | 0 | 0 | 0 | 0 | 0 | 0 | 0 | 2 | 0 | 0 | 0 | 0 | 0 | 0 | 0 |
| 1040 |                                                             | 0 |   |   |   |   |   |   |   |   |   |   |   |   |   |   |   |   |   |
| 49   | interventions associated with transplantation of kidney nos | 0 | 0 | 0 | 0 | 0 | 0 | 0 | 0 | 0 | 0 | 2 | 0 | 0 | 0 | 0 | 0 | 0 | 0 |
| 1040 |                                                             | 0 |   |   |   |   |   |   |   |   |   |   |   |   |   |   |   |   |   |
| 50   | os interventions associated with transplantation of kidney  | 0 | 0 | 0 | 0 | 0 | 0 | 0 | 0 | 0 | 0 | 2 | 0 | 0 | 0 | 0 | 0 | 0 | 0 |
| 1053 |                                                             | 0 |   |   |   |   |   |   |   |   |   |   |   |   |   |   |   |   |   |
| 28   | Cadaveric renal transplant                                  | 0 | 0 | 0 | 0 | 0 | 0 | 0 | 0 | 0 | 0 | 2 | 0 | 0 | 0 | 0 | 0 | 0 | 0 |
| 1057 |                                                             | 0 |   |   |   |   |   |   |   |   |   |   |   |   |   |   |   |   |   |
| 24   | unexplained episode of renal transplant dysfunction         | 0 | 0 | 0 | 0 | 0 | 0 | 0 | 0 | 0 | 0 | 2 | 0 | 0 | 0 | 0 | 0 | 0 | 0 |
| 1057 |                                                             | 0 |   |   |   |   |   |   |   |   |   |   |   |   |   |   |   |   |   |
| 87   | Xenograft renal transplant                                  | 0 | 0 | 0 | 0 | 0 | 0 | 0 | 0 | 0 | 0 | 2 | 0 | 0 | 0 | 0 | 0 | 0 | 0 |
| 1066 |                                                             | 0 |   |   |   |   |   |   |   |   |   |   |   |   |   |   |   |   |   |
| 20   | chronic rejection of renal transplant                       | 0 | 0 | 0 | 0 | 0 | 0 | 0 | 0 | 0 | 0 | 2 | 0 | 0 | 0 | 0 | 0 | 0 | 0 |
| 1068 |                                                             | 0 |   |   |   |   |   |   |   |   |   |   |   |   |   |   |   |   |   |
| 66   | vascular complication of renal transplant                   | 0 | 0 | 0 | 0 | 0 | 0 | 0 | 0 | 0 | 0 | 2 | 0 | 0 | 0 | 0 | 0 | 0 | 0 |
| 1071 |                                                             | 0 |   |   |   |   |   |   |   |   |   |   |   |   |   |   |   |   |   |
| 83   | discussion about kidney transplantation                     | 0 | 0 | 0 | 0 | 0 | 0 | 0 | 0 | 0 | 0 | 2 | 0 | 0 | 0 | 0 | 0 | 0 | 0 |
| 1077 |                                                             | 0 |   |   |   |   |   |   |   |   |   |   |   |   |   |   |   |   |   |
| 52   | urological complication of renal transplant                 | 0 | 0 | 0 | 0 | 0 | 0 | 0 | 0 | 0 | 0 | 2 | 0 | 0 | 0 | 0 | 0 | 0 | 0 |
| 1094 |                                                             | 0 |   |   |   |   |   |   |   |   |   |   |   |   |   |   |   |   |   |
| 55   | Allotransplantation of kidney from cadaver NEC              | 0 | 0 | 0 | 0 | 0 | 0 | 0 | 0 | 0 | 0 | 2 | 0 | 0 | 0 | 0 | 0 | 0 | 0 |
| 2997 |                                                             | 0 |   |   |   |   |   |   |   |   |   |   |   |   |   |   |   |   |   |
|      | Transplantation of kidney                                   | 0 | 0 | 0 | 0 | 0 | 0 | 0 | 0 | 0 | 0 | 2 | 0 | 0 | 0 | 0 | 0 | 0 | 0 |
| 5504 |                                                             | 0 |   |   |   |   |   |   |   |   |   |   |   |   |   |   |   |   |   |
|      | Transplantation of kidney NOS                               | 0 | 0 | 0 | 0 | 0 | 0 | 0 | 0 | 0 | 0 | 2 | 0 | 0 | 0 | 0 | 0 | 0 | 0 |
| 5911 |                                                             | 0 |   |   |   |   |   |   |   |   |   |   |   |   |   |   |   |   |   |
|      | [V]Kidney transplanted                                      | 0 | 0 | 0 | 0 | 0 | 0 | 0 | 0 | 0 | 0 | 2 | 0 | 0 | 0 | 0 | 0 | 0 | 0 |
| 1155 |                                                             | 0 |   |   |   |   |   |   |   |   |   |   |   |   |   |   |   |   |   |
| 3    | Kidney transplant failure and rejection                     | 0 | 0 | 0 | 0 | 0 | 0 | 0 | 0 | 0 | 0 | 2 | 0 | 0 | 0 | 0 | 0 | 0 | 0 |
| 1174 |                                                             | 0 |   |   |   |   |   |   |   |   |   |   |   |   |   |   |   |   |   |
| 5    | Transplantation of kidney from live donor                   | 0 | 0 | 0 | 0 | 0 | 0 | 0 | 0 | 0 | 0 | 2 | 0 | 0 | 0 | 0 | 0 | 0 | 0 |
| 1725 |                                                             | 0 |   |   |   |   |   |   |   |   |   |   |   |   |   |   |   |   |   |
| 3    | Renal transplant planned                                    | 0 | 0 | 0 | 0 | 0 | 0 | 0 | 0 | 0 | 0 | 2 | 0 | 0 | 0 | 0 | 0 | 0 | 0 |
| 1877 |                                                             | 0 |   |   |   |   |   |   |   |   |   |   |   |   |   |   |   |   |   |
| 4    | Renal transplant with complication, without blame           | 0 | 0 | 0 | 0 | 0 | 0 | 0 | 0 | 0 | 0 | 2 | 0 | 0 | 0 | 0 | 0 | 0 | 0 |





|      |                                                             |   |   |   |   |   |   |   |   |   |   |   |   |   |   |   |   |   |   |
|------|-------------------------------------------------------------|---|---|---|---|---|---|---|---|---|---|---|---|---|---|---|---|---|---|
| 5680 |                                                             | 0 |   |   |   |   |   |   |   |   |   |   |   |   |   |   |   |   |   |
| 3    | NIDDM with peripheral circulatory disorder                  | 0 | 0 | 0 | 0 | 0 | 0 | 0 | 0 | 0 | 0 | 0 | 0 | 2 | 0 | 0 | 0 | 0 | 0 |
| 1043 |                                                             | 0 |   |   |   |   |   |   |   |   |   |   |   |   |   |   |   |   |   |
| 23   | Type II diabetes mellitus with gangrene                     | 0 | 0 | 0 | 0 | 0 | 0 | 0 | 0 | 0 | 0 | 0 | 0 | 2 | 0 | 0 | 0 | 0 | 0 |
| 1091 |                                                             | 0 |   |   |   |   |   |   |   |   |   |   |   |   |   |   |   |   |   |
| 97   | Type II diabetes mellitus with neuropathic arthropathy      | 0 | 0 | 0 | 0 | 0 | 0 | 0 | 0 | 0 | 0 | 0 | 0 | 2 | 0 | 0 | 0 | 0 | 0 |
| 1090 |                                                             | 0 |   |   |   |   |   |   |   |   |   |   |   |   |   |   |   |   |   |
| 51   | Insulin dependent diabetes mellitus with gangrene           | 0 | 0 | 0 | 0 | 0 | 0 | 0 | 0 | 0 | 0 | 0 | 0 | 2 | 0 | 0 | 0 | 0 | 0 |
| 1098 |                                                             | 0 |   |   |   |   |   |   |   |   |   |   |   |   |   |   |   |   |   |
| 65   | Type 2 diabetes mellitus with polyneuropathy                | 0 | 0 | 0 | 0 | 0 | 0 | 0 | 0 | 0 | 0 | 0 | 0 | 2 | 0 | 0 | 0 | 0 | 0 |
| 1046 |                                                             | 0 |   |   |   |   |   |   |   |   |   |   |   |   |   |   |   |   |   |
| 39   | Type II diabetes mellitus with peripheral angiopathy        | 0 | 0 | 0 | 0 | 0 | 0 | 0 | 0 | 0 | 0 | 0 | 0 | 2 | 0 | 0 | 0 | 0 | 0 |
| 6912 |                                                             | 0 |   |   |   |   |   |   |   |   |   |   |   |   |   |   |   |   |   |
| 4    | IDDM with peripheral circulatory disorder                   | 0 | 0 | 0 | 0 | 0 | 0 | 0 | 0 | 0 | 0 | 0 | 0 | 2 | 0 | 0 | 0 | 0 | 0 |
| 1078 |                                                             | 0 |   |   |   |   |   |   |   |   |   |   |   |   |   |   |   |   |   |
| 81   | Clinical diabetic nephropathy                               | 0 | 0 | 0 | 0 | 0 | 0 | 0 | 0 | 0 | 0 | 0 | 0 | 2 | 0 | 0 | 0 | 0 | 0 |
| 1087 |                                                             | 0 |   |   |   |   |   |   |   |   |   |   |   |   |   |   |   |   |   |
| 24   | Type I diabetes mellitus with gastroparesis                 | 0 | 0 | 0 | 0 | 0 | 0 | 0 | 0 | 0 | 0 | 0 | 0 | 2 | 0 | 0 | 0 | 0 | 0 |
| 1814 |                                                             | 0 |   |   |   |   |   |   |   |   |   |   |   |   |   |   |   |   |   |
| 2    | Diabetic cheiroarthropathy                                  | 0 | 0 | 0 | 0 | 0 | 0 | 0 | 0 | 0 | 0 | 0 | 0 | 2 | 0 | 0 | 0 | 0 | 0 |
| 6428 |                                                             | 0 |   |   |   |   |   |   |   |   |   |   |   |   |   |   |   |   |   |
| 3    | Other specified diabetes mellitus with unspecified comps    | 0 | 0 | 0 | 0 | 0 | 0 | 0 | 0 | 0 | 0 | 0 | 0 | 2 | 0 | 0 | 0 | 0 | 0 |
| 9923 |                                                             | 0 |   |   |   |   |   |   |   |   |   |   |   |   |   |   |   |   |   |
| 1    | Type I diabetes mellitus with mononeuropathy                | 0 | 0 | 0 | 0 | 0 | 0 | 0 | 0 | 0 | 0 | 0 | 0 | 2 | 0 | 0 | 0 | 0 | 0 |
| 9194 |                                                             | 0 |   |   |   |   |   |   |   |   |   |   |   |   |   |   |   |   |   |
| 2    | Type I diabetes mellitus with multiple complications        | 0 | 0 | 0 | 0 | 0 | 0 | 0 | 0 | 0 | 0 | 0 | 0 | 2 | 0 | 0 | 0 | 0 | 0 |
| 4040 |                                                             | 0 |   |   |   |   |   |   |   |   |   |   |   |   |   |   |   |   |   |
| 1    | Non-insulin dependent diabetes mellitus with gangrene       | 0 | 0 | 0 | 0 | 0 | 0 | 0 | 0 | 0 | 0 | 0 | 0 | 2 | 0 | 0 | 0 | 0 | 0 |
| 4549 |                                                             | 0 |   |   |   |   |   |   |   |   |   |   |   |   |   |   |   |   |   |
| 1    | Diabetes mellitus with unspecified complication             | 0 | 0 | 0 | 0 | 0 | 0 | 0 | 0 | 0 | 0 | 0 | 0 | 2 | 0 | 0 | 0 | 0 | 0 |
| 5421 |                                                             | 0 |   |   |   |   |   |   |   |   |   |   |   |   |   |   |   |   |   |
| 2    | Non-insulin-dependent d m with peripheral angiopath         | 0 | 0 | 0 | 0 | 0 | 0 | 0 | 0 | 0 | 0 | 0 | 0 | 2 | 0 | 0 | 0 | 0 | 0 |
| 6214 |                                                             | 0 |   |   |   |   |   |   |   |   |   |   |   |   |   |   |   |   |   |
| 6    | Non-insulin-dependent diabetes mellitus with multiple comps | 0 | 0 | 0 | 0 | 0 | 0 | 0 | 0 | 0 | 0 | 0 | 0 | 2 | 0 | 0 | 0 | 0 | 0 |
| 9346 |                                                             | 0 |   |   |   |   |   |   |   |   |   |   |   |   |   |   |   |   |   |
| 8    | Type 1 diabetes mellitus with peripheral angiopathy         | 0 | 0 | 0 | 0 | 0 | 0 | 0 | 0 | 0 | 0 | 0 | 0 | 2 | 0 | 0 | 0 | 0 | 0 |
| 5485 |                                                             | 0 |   |   |   |   |   |   |   |   |   |   |   |   |   |   |   |   |   |
| 6    | Diabetes mellitus, adult onset, with ketoacidosis           | 0 | 0 | 0 | 0 | 0 | 0 | 0 | 0 | 0 | 0 | 0 | 0 | 2 | 0 | 0 | 0 | 0 | 0 |
| 4964 |                                                             | 0 |   |   |   |   |   |   |   |   |   |   |   |   |   |   |   |   |   |
| 0    | O/E - left chronic diabetic foot ulcer                      | 0 | 0 | 0 | 0 | 0 | 0 | 0 | 0 | 0 | 0 | 0 | 0 | 2 | 0 | 0 | 0 | 0 | 0 |
| 3105 |                                                             | 0 |   |   |   |   |   |   |   |   |   |   |   |   |   |   |   |   |   |
| 3    | [D]Widespread diabetic foot gangrene                        | 0 | 0 | 0 | 0 | 0 | 0 | 0 | 0 | 0 | 0 | 0 | 0 | 2 | 0 | 0 | 0 | 0 | 0 |
| 6839 |                                                             | 0 |   |   |   |   |   |   |   |   |   |   |   |   |   |   |   |   |   |
| 0    | Type 1 diabetes mellitus with ulcer                         | 0 | 0 | 0 | 0 | 0 | 0 | 0 | 0 | 0 | 0 | 0 | 0 | 2 | 0 | 0 | 0 | 0 | 0 |
| 3539 |                                                             | 0 |   |   |   |   |   |   |   |   |   |   |   |   |   |   |   |   |   |
| 9    | Diabetes mellitus with peripheral circulatory disorder      | 0 | 0 | 0 | 0 | 0 | 0 | 0 | 0 | 0 | 0 | 0 | 0 | 2 | 0 | 0 | 0 | 0 | 0 |
| 9870 |                                                             | 0 |   |   |   |   |   |   |   |   |   |   |   |   |   |   |   |   |   |
| 4    | Insulin dependent diabetes mellitus with ulcer              | 0 | 0 | 0 | 0 | 0 | 0 | 0 | 0 | 0 | 0 | 0 | 0 | 2 | 0 | 0 | 0 | 0 | 0 |

|      |    |                                                              |   |   |   |   |   |   |   |   |   |   |   |   |   |   |   |   |   |   |
|------|----|--------------------------------------------------------------|---|---|---|---|---|---|---|---|---|---|---|---|---|---|---|---|---|---|
| 5363 | 4  | [D]Gangrene of toe in diabetic                               | 0 | 0 | 0 | 0 | 0 | 0 | 0 | 0 | 0 | 0 | 0 | 2 | 0 | 0 | 0 | 0 | 0 | 0 |
| 1273 | 6  | Type 2 diabetes mellitus with gangrene                       | 0 | 0 | 0 | 0 | 0 | 0 | 0 | 0 | 0 | 0 | 0 | 2 | 0 | 0 | 0 | 0 | 0 | 0 |
| 1029 | 46 | Insulin-dependent diabetes mellitus with renal complications | 0 | 0 | 0 | 0 | 0 | 0 | 0 | 0 | 0 | 0 | 0 | 2 | 0 | 0 | 0 | 0 | 0 | 0 |
| 6444 | 9  | Unspecified diabetes mellitus with multiple complications    | 0 | 0 | 0 | 0 | 0 | 0 | 0 | 0 | 0 | 0 | 0 | 2 | 0 | 0 | 0 | 0 | 0 | 0 |
| 6435 | 7  | Diabetes mellitus NOS with unspecified complication          | 0 | 0 | 0 | 0 | 0 | 0 | 0 | 0 | 0 | 0 | 0 | 2 | 0 | 0 | 0 | 0 | 0 | 0 |
| 6570 | 4  | Type 2 diabetes mellitus with ulcer                          | 0 | 0 | 0 | 0 | 0 | 0 | 0 | 0 | 0 | 0 | 0 | 2 | 0 | 0 | 0 | 0 | 0 | 0 |
| 5507 | 5  | Type II diabetes mellitus with ulcer                         | 0 | 0 | 0 | 0 | 0 | 0 | 0 | 0 | 0 | 0 | 0 | 2 | 0 | 0 | 0 | 0 | 0 | 0 |
| 6526 | 7  | Type 2 diabetes mellitus with multiple complications         | 0 | 0 | 0 | 0 | 0 | 0 | 0 | 0 | 0 | 0 | 0 | 2 | 0 | 0 | 0 | 0 | 0 | 0 |
| 6235 | 2  | Type I diabetes mellitus with arthropathy                    | 0 | 0 | 0 | 0 | 0 | 0 | 0 | 0 | 0 | 0 | 0 | 2 | 0 | 0 | 0 | 0 | 0 | 0 |
| 5925 | 3  | Type 2 diabetes mellitus with arthropathy                    | 0 | 0 | 0 | 0 | 0 | 0 | 0 | 0 | 0 | 0 | 0 | 2 | 0 | 0 | 0 | 0 | 0 | 0 |
| 7328 |    | Cellulitis in diabetic foot                                  | 0 | 0 | 0 | 0 | 0 | 0 | 0 | 0 | 0 | 0 | 0 | 2 | 0 | 0 | 0 | 0 | 0 | 0 |
| 1021 | 12 | Type I diabetes mellitus with gangrene                       | 0 | 0 | 0 | 0 | 0 | 0 | 0 | 0 | 0 | 0 | 0 | 2 | 0 | 0 | 0 | 0 | 0 | 0 |
| 5733 | 3  | Diabetic cheiropathy                                         | 0 | 0 | 0 | 0 | 0 | 0 | 0 | 0 | 0 | 0 | 0 | 2 | 0 | 0 | 0 | 0 | 0 | 0 |
| 4907 | 4  | Type 2 diabetes mellitus with ulcer                          | 0 | 0 | 0 | 0 | 0 | 0 | 0 | 0 | 0 | 0 | 0 | 2 | 0 | 0 | 0 | 0 | 0 | 0 |
| 1864 | 2  | Type 1 diabetes mellitus with arthropathy                    | 0 | 0 | 0 | 0 | 0 | 0 | 0 | 0 | 0 | 0 | 0 | 2 | 0 | 0 | 0 | 0 | 0 | 0 |
| 1814 | 3  | Type II diabetes mellitus with arthropathy                   | 0 | 0 | 0 | 0 | 0 | 0 | 0 | 0 | 0 | 0 | 0 | 2 | 0 | 0 | 0 | 0 | 0 | 0 |
| 5489 | 9  | Type II diabetes mellitus with peripheral angiopathy         | 0 | 0 | 0 | 0 | 0 | 0 | 0 | 0 | 0 | 0 | 0 | 2 | 0 | 0 | 0 | 0 | 0 | 0 |
| 1868 | 3  | Type 1 diabetes mellitus with ulcer                          | 0 | 0 | 0 | 0 | 0 | 0 | 0 | 0 | 0 | 0 | 0 | 2 | 0 | 0 | 0 | 0 | 0 | 0 |
| 6049 | 9  | Insulin dependent diabetes mellitus with gangrene            | 0 | 0 | 0 | 0 | 0 | 0 | 0 | 0 | 0 | 0 | 0 | 2 | 0 | 0 | 0 | 0 | 0 | 0 |
| 6069 | 9  | Type 2 diabetes mellitus with peripheral angiopathy          | 0 | 0 | 0 | 0 | 0 | 0 | 0 | 0 | 0 | 0 | 0 | 2 | 0 | 0 | 0 | 0 | 0 | 0 |
| 9881 |    | Mixed diabetic ulcer - foot                                  | 0 | 0 | 0 | 0 | 0 | 0 | 0 | 0 | 0 | 0 | 0 | 2 | 0 | 0 | 0 | 0 | 0 | 0 |
| 1009 | 8  | Other specified diabetes mellitus with other spec comps      | 0 | 0 | 0 | 0 | 0 | 0 | 0 | 0 | 0 | 0 | 0 | 2 | 0 | 0 | 0 | 0 | 0 | 0 |
| 3445 | 0  | Hyperosmolar non-ketotic state in type 2 diabetes mellitus   | 0 | 0 | 0 | 0 | 0 | 0 | 0 | 0 | 0 | 0 | 0 | 2 | 0 | 0 | 0 | 0 | 0 | 0 |
| 9931 | 1  | Type I diabetes mellitus with ophthalmic complications       | 0 | 0 | 0 | 0 | 0 | 0 | 0 | 0 | 0 | 0 | 0 | 2 | 0 | 0 | 0 | 0 | 0 | 0 |



|            |                                                              |   |   |   |   |   |   |   |   |   |   |   |   |   |   |   |   |   |   |   |
|------------|--------------------------------------------------------------|---|---|---|---|---|---|---|---|---|---|---|---|---|---|---|---|---|---|---|
| 6879<br>2  | Diabetes mellitus, juvenile type, + unspecified complication | 0 | 0 | 0 | 0 | 0 | 0 | 0 | 0 | 0 | 0 | 0 | 0 | 2 | 0 | 0 | 0 | 0 | 0 | 0 |
| 1017<br>35 | Insulin-dependent diabetes mellitus with neurological comps  | 0 | 0 | 0 | 0 | 0 | 0 | 0 | 0 | 0 | 0 | 0 | 0 | 2 | 0 | 0 | 0 | 0 | 0 | 0 |
| 1009<br>64 | Type II diabetes mellitus with ophthalmic complications      | 0 | 0 | 0 | 0 | 0 | 0 | 0 | 0 | 0 | 0 | 0 | 0 | 2 | 0 | 0 | 0 | 0 | 0 | 0 |
| 3334<br>3  | Diabetes mellitus with other specified manifestation         | 0 | 0 | 0 | 0 | 0 | 0 | 0 | 0 | 0 | 0 | 0 | 0 | 2 | 0 | 0 | 0 | 0 | 0 | 0 |
| 1007<br>70 | Insulin dependent diabetes mellitus with diabetic cataract   | 0 | 0 | 0 | 0 | 0 | 0 | 0 | 0 | 0 | 0 | 0 | 0 | 2 | 0 | 0 | 0 | 0 | 0 | 0 |
| 6502<br>5  | Diabetes mellitus NOS with peripheral circulatory disorder   | 0 | 0 | 0 | 0 | 0 | 0 | 0 | 0 | 0 | 0 | 0 | 0 | 2 | 0 | 0 | 0 | 0 | 0 | 0 |
| 1022<br>01 | Type II diabetes mellitus with nephropathy                   | 0 | 0 | 0 | 0 | 0 | 0 | 0 | 0 | 0 | 0 | 0 | 0 | 2 | 0 | 0 | 0 | 0 | 0 | 0 |
| 4615<br>0  | Type 2 diabetes mellitus with gangrene                       | 0 | 0 | 0 | 0 | 0 | 0 | 0 | 0 | 0 | 0 | 0 | 0 | 2 | 0 | 0 | 0 | 0 | 0 | 0 |
| 2792<br>1  | Foot abnormality - diabetes related                          | 0 | 0 | 0 | 0 | 0 | 0 | 0 | 0 | 0 | 0 | 0 | 0 | 2 | 0 | 0 | 0 | 0 | 0 | 0 |
| 3531<br>6  | O/E - Right diabetic foot - ulcerated                        | 0 | 0 | 0 | 0 | 0 | 0 | 0 | 0 | 0 | 0 | 0 | 0 | 2 | 0 | 0 | 0 | 0 | 0 | 0 |
| 2432<br>7  | Ischaemic ulcer diabetic foot                                | 0 | 0 | 0 | 0 | 0 | 0 | 0 | 0 | 0 | 0 | 0 | 0 | 2 | 0 | 0 | 0 | 0 | 0 | 0 |
| 6561<br>6  | Insulin dependent diabetes mellitus with arthropathy         | 0 | 0 | 0 | 0 | 0 | 0 | 0 | 0 | 0 | 0 | 0 | 0 | 2 | 0 | 0 | 0 | 0 | 0 | 0 |
| 1731<br>3  | Diabetic iritis                                              | 0 | 0 | 0 | 0 | 0 | 0 | 0 | 0 | 0 | 0 | 0 | 0 | 2 | 0 | 0 | 0 | 0 | 0 | 0 |
| 4527<br>6  | Insulin dependent diabetes mellitus with multiple complicat  | 0 | 0 | 0 | 0 | 0 | 0 | 0 | 0 | 0 | 0 | 0 | 0 | 2 | 0 | 0 | 0 | 0 | 0 | 0 |
| 6337<br>1  | Diabetes mellitus, adult, + other specified manifestation    | 0 | 0 | 0 | 0 | 0 | 0 | 0 | 0 | 0 | 0 | 0 | 0 | 2 | 0 | 0 | 0 | 0 | 0 | 0 |
| 6444<br>6  | Insulin dependent diab mell with peripheral angiopathy       | 0 | 0 | 0 | 0 | 0 | 0 | 0 | 0 | 0 | 0 | 0 | 0 | 2 | 0 | 0 | 0 | 0 | 0 | 0 |
| 2469<br>3  | Non-insulin dependent diabetes mellitus with arthropathy     | 0 | 0 | 0 | 0 | 0 | 0 | 0 | 0 | 0 | 0 | 0 | 0 | 2 | 0 | 0 | 0 | 0 | 0 | 0 |
| 4765<br>0  | Type 1 diabetes mellitus with multiple complications         | 0 | 0 | 0 | 0 | 0 | 0 | 0 | 0 | 0 | 0 | 0 | 0 | 2 | 0 | 0 | 0 | 0 | 0 | 0 |
| 6335<br>7  | Diabetes mellitus, adult, + peripheral circulatory disorder  | 0 | 0 | 0 | 0 | 0 | 0 | 0 | 0 | 0 | 0 | 0 | 0 | 2 | 0 | 0 | 0 | 0 | 0 | 0 |
| 4629<br>0  | Other specified diabetes mellitus with multiple comps        | 0 | 0 | 0 | 0 | 0 | 0 | 0 | 0 | 0 | 0 | 0 | 0 | 2 | 0 | 0 | 0 | 0 | 0 | 0 |
| 7082<br>1  | Diabetes mellitus NOS with other specified manifestation     | 0 | 0 | 0 | 0 | 0 | 0 | 0 | 0 | 0 | 0 | 0 | 0 | 2 | 0 | 0 | 0 | 0 | 0 | 0 |
| 5210<br>4  | Insulin dependent diabetes mellitus with multiple complicatn | 0 | 0 | 0 | 0 | 0 | 0 | 0 | 0 | 0 | 0 | 0 | 0 | 2 | 0 | 0 | 0 | 0 | 0 | 0 |
| 9962<br>8  | [X]Glomerular disorders in diabetes mellitus                 | 0 | 0 | 0 | 0 | 0 | 0 | 0 | 0 | 0 | 0 | 0 | 0 | 2 | 0 | 0 | 0 | 0 | 0 | 0 |
| 2986       | Preproliferative diabetic retinopathy                        | 0 | 0 | 0 | 0 | 0 | 0 | 0 | 0 | 0 | 0 | 0 | 0 | 2 | 0 | 0 | 0 | 0 | 0 | 0 |

|           |                                                             |   |   |   |   |   |   |   |   |   |   |   |   |   |   |   |   |   |   |
|-----------|-------------------------------------------------------------|---|---|---|---|---|---|---|---|---|---|---|---|---|---|---|---|---|---|
| 1310<br>3 | O/E - left eye preproliferative diabetic retinopathy        | 0 | 0 | 0 | 0 | 0 | 0 | 0 | 0 | 0 | 0 | 0 | 0 | 2 | 0 | 0 | 0 | 0 | 0 |
| 3047<br>7 | High risk proliferative diabetic retinopathy                | 0 | 0 | 0 | 0 | 0 | 0 | 0 | 0 | 0 | 0 | 0 | 0 | 2 | 0 | 0 | 0 | 0 | 0 |
| 1820<br>9 | Type 2 diabetes mellitus with renal complications           | 0 | 0 | 0 | 0 | 0 | 0 | 0 | 0 | 0 | 0 | 0 | 0 | 2 | 0 | 0 | 0 | 0 | 0 |
| 4104<br>9 | Type 1 diabetes mellitus with retinopathy                   | 0 | 0 | 0 | 0 | 0 | 0 | 0 | 0 | 0 | 0 | 0 | 0 | 2 | 0 | 0 | 0 | 0 | 0 |
| 4781<br>6 | Type II diabetes mellitus with neuropathic arthropathy      | 0 | 0 | 0 | 0 | 0 | 0 | 0 | 0 | 0 | 0 | 0 | 0 | 2 | 0 | 0 | 0 | 0 | 0 |
| 1706<br>7 | Autonomic neuropathy due to diabetes                        | 0 | 0 | 0 | 0 | 0 | 0 | 0 | 0 | 0 | 0 | 0 | 0 | 2 | 0 | 0 | 0 | 0 | 0 |
| 9534<br>3 | Type I diabetes mellitus with retinopathy                   | 0 | 0 | 0 | 0 | 0 | 0 | 0 | 0 | 0 | 0 | 0 | 0 | 2 | 0 | 0 | 0 | 0 | 0 |
| 5584<br>2 | Non-insulin-dependent diabetes mellitus with neuro comps    | 0 | 0 | 0 | 0 | 0 | 0 | 0 | 0 | 0 | 0 | 0 | 0 | 2 | 0 | 0 | 0 | 0 | 0 |
| 4927<br>6 | Insulin-dependent diabetes mellitus with ophthalmic comps   | 0 | 0 | 0 | 0 | 0 | 0 | 0 | 0 | 0 | 0 | 0 | 0 | 2 | 0 | 0 | 0 | 0 | 0 |
| 3029<br>4 | Type 1 diabetes mellitus with persistent microalbuminuria   | 0 | 0 | 0 | 0 | 0 | 0 | 0 | 0 | 0 | 0 | 0 | 0 | 2 | 0 | 0 | 0 | 0 | 0 |
| 9372<br>7 | Type II diabetes mellitus with diabetic cataract            | 0 | 0 | 0 | 0 | 0 | 0 | 0 | 0 | 0 | 0 | 0 | 0 | 2 | 0 | 0 | 0 | 0 | 0 |
| 1650<br>2 | Diabetes mellitus with renal manifestation                  | 0 | 0 | 0 | 0 | 0 | 0 | 0 | 0 | 0 | 0 | 0 | 0 | 2 | 0 | 0 | 0 | 0 | 0 |
| 4546<br>7 | Non-insulin dependent diabetes mellitus with polyneuropathy | 0 | 0 | 0 | 0 | 0 | 0 | 0 | 0 | 0 | 0 | 0 | 0 | 2 | 0 | 0 | 0 | 0 | 0 |
| 6509      | Insulin dependent diabetes mellitus with retinopathy        | 0 | 0 | 0 | 0 | 0 | 0 | 0 | 0 | 0 | 0 | 0 | 0 | 2 | 0 | 0 | 0 | 0 | 0 |
| 1724<br>7 | Diabetic mononeuritis NOS                                   | 0 | 0 | 0 | 0 | 0 | 0 | 0 | 0 | 0 | 0 | 0 | 0 | 2 | 0 | 0 | 0 | 0 | 0 |
| 3816<br>1 | Type I diabetes mellitus with retinopathy                   | 0 | 0 | 0 | 0 | 0 | 0 | 0 | 0 | 0 | 0 | 0 | 0 | 2 | 0 | 0 | 0 | 0 | 0 |
| 6927<br>8 | Non-insulin depend diabetes mellitus with diabetic cataract | 0 | 0 | 0 | 0 | 0 | 0 | 0 | 0 | 0 | 0 | 0 | 0 | 2 | 0 | 0 | 0 | 0 | 0 |
| 2340      | Diabetic amyotrophy                                         | 0 | 0 | 0 | 0 | 0 | 0 | 0 | 0 | 0 | 0 | 0 | 0 | 2 | 0 | 0 | 0 | 0 | 0 |
| 9835      | O/E - diabetic maculopathy present both eyes                | 0 | 0 | 0 | 0 | 0 | 0 | 0 | 0 | 0 | 0 | 0 | 0 | 2 | 0 | 0 | 0 | 0 | 0 |
| 5081<br>3 | Type II diabetes mellitus with mononeuropathy               | 0 | 0 | 0 | 0 | 0 | 0 | 0 | 0 | 0 | 0 | 0 | 0 | 2 | 0 | 0 | 0 | 0 | 0 |
| 3980<br>9 | Insulin dependent diab mell with neuropathic arthropathy    | 0 | 0 | 0 | 0 | 0 | 0 | 0 | 0 | 0 | 0 | 0 | 0 | 2 | 0 | 0 | 0 | 0 | 0 |
| 1849<br>6 | Type 2 diabetes mellitus with retinopathy                   | 0 | 0 | 0 | 0 | 0 | 0 | 0 | 0 | 0 | 0 | 0 | 0 | 2 | 0 | 0 | 0 | 0 | 0 |
| 4276<br>2 | Type 2 diabetes mellitus with retinopathy                   | 0 | 0 | 0 | 0 | 0 | 0 | 0 | 0 | 0 | 0 | 0 | 0 | 2 | 0 | 0 | 0 | 0 | 0 |
| 6134<br>4 | Type I diabetes mellitus with renal complications           | 0 | 0 | 0 | 0 | 0 | 0 | 0 | 0 | 0 | 0 | 0 | 0 | 2 | 0 | 0 | 0 | 0 | 0 |

|           |                                                                  |   |   |   |   |   |   |   |   |   |   |   |   |   |   |   |   |   |   |   |
|-----------|------------------------------------------------------------------|---|---|---|---|---|---|---|---|---|---|---|---|---|---|---|---|---|---|---|
| 3942<br>0 | Myasthenic syndrome due to diabetic amyotrophy                   | 0 | 0 | 0 | 0 | 0 | 0 | 0 | 0 | 0 | 0 | 0 | 0 | 2 | 0 | 0 | 0 | 0 | 0 | 0 |
| 4914<br>6 | Type I diabetes mellitus with neurological complications         | 0 | 0 | 0 | 0 | 0 | 0 | 0 | 0 | 0 | 0 | 0 | 0 | 2 | 0 | 0 | 0 | 0 | 0 | 0 |
| 1310<br>2 | O/E - right eye diabetic maculopathy                             | 0 | 0 | 0 | 0 | 0 | 0 | 0 | 0 | 0 | 0 | 0 | 0 | 2 | 0 | 0 | 0 | 0 | 0 | 0 |
| 4549<br>9 | Kimmelstiel - Wilson disease                                     | 0 | 0 | 0 | 0 | 0 | 0 | 0 | 0 | 0 | 0 | 0 | 0 | 2 | 0 | 0 | 0 | 0 | 0 | 0 |
| 1166<br>3 | Neuropathic diabetic ulcer - foot                                | 0 | 0 | 0 | 0 | 0 | 0 | 0 | 0 | 0 | 0 | 0 | 0 | 2 | 0 | 0 | 0 | 0 | 0 | 0 |
| 7069      | Background diabetic retinopathy                                  | 0 | 0 | 0 | 0 | 0 | 0 | 0 | 0 | 0 | 0 | 0 | 0 | 2 | 0 | 0 | 0 | 0 | 0 | 0 |
| 1310<br>8 | O/E - left eye diabetic maculopathy                              | 0 | 0 | 0 | 0 | 0 | 0 | 0 | 0 | 0 | 0 | 0 | 0 | 2 | 0 | 0 | 0 | 0 | 0 | 0 |
| 4477<br>9 | Type 2 diabetes mellitus with diabetic cataract                  | 0 | 0 | 0 | 0 | 0 | 0 | 0 | 0 | 0 | 0 | 0 | 0 | 2 | 0 | 0 | 0 | 0 | 0 | 0 |
| 4819<br>2 | Type II diabetes mellitus with diabetic cataract                 | 0 | 0 | 0 | 0 | 0 | 0 | 0 | 0 | 0 | 0 | 0 | 0 | 2 | 0 | 0 | 0 | 0 | 0 | 0 |
| 1649<br>1 | Diabetes mellitus with polyneuropathy                            | 0 | 0 | 0 | 0 | 0 | 0 | 0 | 0 | 0 | 0 | 0 | 0 | 2 | 0 | 0 | 0 | 0 | 0 | 0 |
| 2342      | Diabetic neuropathy                                              | 0 | 0 | 0 | 0 | 0 | 0 | 0 | 0 | 0 | 0 | 0 | 0 | 2 | 0 | 0 | 0 | 0 | 0 | 0 |
| 4965<br>5 | Type II diabetes mellitus with retinopathy                       | 0 | 0 | 0 | 0 | 0 | 0 | 0 | 0 | 0 | 0 | 0 | 0 | 2 | 0 | 0 | 0 | 0 | 0 | 0 |
| 1310<br>1 | O/E - left eye proliferative diabetic retinopathy                | 0 | 0 | 0 | 0 | 0 | 0 | 0 | 0 | 0 | 0 | 0 | 0 | 2 | 0 | 0 | 0 | 0 | 0 | 0 |
| 1112<br>9 | O/E - left eye background diabetic retinopathy                   | 0 | 0 | 0 | 0 | 0 | 0 | 0 | 0 | 0 | 0 | 0 | 0 | 2 | 0 | 0 | 0 | 0 | 0 | 0 |
| 7232<br>0 | Non-insulin dependent diabetes mellitus with mononeuropathy      | 0 | 0 | 0 | 0 | 0 | 0 | 0 | 0 | 0 | 0 | 0 | 0 | 2 | 0 | 0 | 0 | 0 | 0 | 0 |
| 9789<br>4 | Type I diabetes mellitus with exudative maculopathy              | 0 | 0 | 0 | 0 | 0 | 0 | 0 | 0 | 0 | 0 | 0 | 0 | 2 | 0 | 0 | 0 | 0 | 0 | 0 |
| 3325<br>4 | Diabetes mellitus with ophthalmic manifestation                  | 0 | 0 | 0 | 0 | 0 | 0 | 0 | 0 | 0 | 0 | 0 | 0 | 2 | 0 | 0 | 0 | 0 | 0 | 0 |
| 9194<br>3 | Type I diabetes mellitus with polyneuropathy                     | 0 | 0 | 0 | 0 | 0 | 0 | 0 | 0 | 0 | 0 | 0 | 0 | 2 | 0 | 0 | 0 | 0 | 0 | 0 |
| 1323      | Diabetic retinopathy                                             | 0 | 0 | 0 | 0 | 0 | 0 | 0 | 0 | 0 | 0 | 0 | 0 | 2 | 0 | 0 | 0 | 0 | 0 | 0 |
| 1309<br>9 | O/E - right eye preproliferative diabetic retinopathy            | 0 | 0 | 0 | 0 | 0 | 0 | 0 | 0 | 0 | 0 | 0 | 0 | 2 | 0 | 0 | 0 | 0 | 0 | 0 |
| 5204<br>1 | O/E - left eye stable treated proliferative diabetic retinopathy | 0 | 0 | 0 | 0 | 0 | 0 | 0 | 0 | 0 | 0 | 0 | 0 | 2 | 0 | 0 | 0 | 0 | 0 | 0 |
| 6457<br>1 | Type II diabetes mellitus with nephropathy                       | 0 | 0 | 0 | 0 | 0 | 0 | 0 | 0 | 0 | 0 | 0 | 0 | 2 | 0 | 0 | 0 | 0 | 0 | 0 |
| 1075<br>5 | Non proliferative diabetic retinopathy                           | 0 | 0 | 0 | 0 | 0 | 0 | 0 | 0 | 0 | 0 | 0 | 0 | 2 | 0 | 0 | 0 | 0 | 0 | 0 |
| 7795      | Diabetes mellitus with neuropathy                                | 0 | 0 | 0 | 0 | 0 | 0 | 0 | 0 | 0 | 0 | 0 | 0 | 2 | 0 | 0 | 0 | 0 | 0 | 0 |

|           |                                                             |   |   |   |   |   |   |   |   |   |   |   |   |   |   |   |   |   |   |   |
|-----------|-------------------------------------------------------------|---|---|---|---|---|---|---|---|---|---|---|---|---|---|---|---|---|---|---|
| 3538<br>5 | Type 2 diabetes mellitus with neuropathic arthropathy       | 0 | 0 | 0 | 0 | 0 | 0 | 0 | 0 | 0 | 0 | 0 | 0 | 2 | 0 | 0 | 0 | 0 | 0 | 0 |
| 3428<br>3 | Diabetes mellitus NOS with ophthalmic manifestation         | 0 | 0 | 0 | 0 | 0 | 0 | 0 | 0 | 0 | 0 | 0 | 0 | 2 | 0 | 0 | 0 | 0 | 0 | 0 |
| 9392<br>2 | Diabetes mellitus, juvenile type, with renal manifestation  | 0 | 0 | 0 | 0 | 0 | 0 | 0 | 0 | 0 | 0 | 0 | 0 | 2 | 0 | 0 | 0 | 0 | 0 | 0 |
| 5022<br>5 | Type II diabetes mellitus with renal complications          | 0 | 0 | 0 | 0 | 0 | 0 | 0 | 0 | 0 | 0 | 0 | 0 | 2 | 0 | 0 | 0 | 0 | 0 | 0 |
| 5228<br>3 | Insulin-dependent diabetes mellitus with neurological comps | 0 | 0 | 0 | 0 | 0 | 0 | 0 | 0 | 0 | 0 | 0 | 0 | 2 | 0 | 0 | 0 | 0 | 0 | 0 |
| 4758<br>2 | Type 1 diabetes mellitus with renal complications           | 0 | 0 | 0 | 0 | 0 | 0 | 0 | 0 | 0 | 0 | 0 | 0 | 2 | 0 | 0 | 0 | 0 | 0 | 0 |
| 6696<br>5 | Type 2 diabetes mellitus with neuropathic arthropathy       | 0 | 0 | 0 | 0 | 0 | 0 | 0 | 0 | 0 | 0 | 0 | 0 | 2 | 0 | 0 | 0 | 0 | 0 | 0 |
| 3179<br>0 | Polyneuropathy in diabetes                                  | 0 | 0 | 0 | 0 | 0 | 0 | 0 | 0 | 0 | 0 | 0 | 0 | 2 | 0 | 0 | 0 | 0 | 0 | 0 |
| 6020<br>8 | Type I diabetes mellitus with neuropathic arthropathy       | 0 | 0 | 0 | 0 | 0 | 0 | 0 | 0 | 0 | 0 | 0 | 0 | 2 | 0 | 0 | 0 | 0 | 0 | 0 |
| 2471      | Nephrotic syndrome in diabetes mellitus                     | 0 | 0 | 0 | 0 | 0 | 0 | 0 | 0 | 0 | 0 | 0 | 0 | 2 | 0 | 0 | 0 | 0 | 0 | 0 |
| 9807<br>1 | Insulin-dependent diabetes mellitus with ophthalmic comps   | 0 | 0 | 0 | 0 | 0 | 0 | 0 | 0 | 0 | 0 | 0 | 0 | 2 | 0 | 0 | 0 | 0 | 0 | 0 |
| 6369<br>0 | Type 2 diabetes mellitus with gastroparesis                 | 0 | 0 | 0 | 0 | 0 | 0 | 0 | 0 | 0 | 0 | 0 | 0 | 2 | 0 | 0 | 0 | 0 | 0 | 0 |
| 5762<br>1 | Insulin dependent diabetes mellitus with nephropathy        | 0 | 0 | 0 | 0 | 0 | 0 | 0 | 0 | 0 | 0 | 0 | 0 | 2 | 0 | 0 | 0 | 0 | 0 | 0 |
| 1838<br>7 | Type 1 diabetes mellitus with retinopathy                   | 0 | 0 | 0 | 0 | 0 | 0 | 0 | 0 | 0 | 0 | 0 | 0 | 2 | 0 | 0 | 0 | 0 | 0 | 0 |
| 1842<br>5 | Type 2 diabetes mellitus with polyneuropathy                | 0 | 0 | 0 | 0 | 0 | 0 | 0 | 0 | 0 | 0 | 0 | 0 | 2 | 0 | 0 | 0 | 0 | 0 | 0 |
| 4096<br>2 | Non-insulin dependent d m with neuropathic arthropathy      | 0 | 0 | 0 | 0 | 0 | 0 | 0 | 0 | 0 | 0 | 0 | 0 | 2 | 0 | 0 | 0 | 0 | 0 | 0 |
| 4807<br>8 | Acute painful diabetic neuropathy                           | 0 | 0 | 0 | 0 | 0 | 0 | 0 | 0 | 0 | 0 | 0 | 0 | 2 | 0 | 0 | 0 | 0 | 0 | 0 |
| 5002      | Diabetic polyneuropathy                                     | 0 | 0 | 0 | 0 | 0 | 0 | 0 | 0 | 0 | 0 | 0 | 0 | 2 | 0 | 0 | 0 | 0 | 0 | 0 |
| 3731<br>5 | Diabetic mononeuropathy                                     | 0 | 0 | 0 | 0 | 0 | 0 | 0 | 0 | 0 | 0 | 0 | 0 | 2 | 0 | 0 | 0 | 0 | 0 | 0 |
| 1823<br>0 | Type 1 diabetes mellitus with neuropathic arthropathy       | 0 | 0 | 0 | 0 | 0 | 0 | 0 | 0 | 0 | 0 | 0 | 0 | 2 | 0 | 0 | 0 | 0 | 0 | 0 |
| 5523<br>9 | Type 1 diabetes mellitus with gastroparesis                 | 0 | 0 | 0 | 0 | 0 | 0 | 0 | 0 | 0 | 0 | 0 | 0 | 2 | 0 | 0 | 0 | 0 | 0 | 0 |
| 2469<br>4 | Insulin dependent diabetes mellitus with mononeuropathy     | 0 | 0 | 0 | 0 | 0 | 0 | 0 | 0 | 0 | 0 | 0 | 0 | 2 | 0 | 0 | 0 | 0 | 0 | 0 |
| 3426<br>8 | Type 2 diabetes mellitus with neurological complications    | 0 | 0 | 0 | 0 | 0 | 0 | 0 | 0 | 0 | 0 | 0 | 0 | 2 | 0 | 0 | 0 | 0 | 0 | 0 |
| 6687<br>2 | Type I diabetes mellitus with nephropathy                   | 0 | 0 | 0 | 0 | 0 | 0 | 0 | 0 | 0 | 0 | 0 | 0 | 2 | 0 | 0 | 0 | 0 | 0 | 0 |

|      |   |                                                               |   |   |   |   |   |   |   |   |   |   |   |   |   |   |   |   |   |   |
|------|---|---------------------------------------------------------------|---|---|---|---|---|---|---|---|---|---|---|---|---|---|---|---|---|---|
| 3578 | 5 | Chronic painful diabetic neuropathy                           | 0 | 0 | 0 | 0 | 0 | 0 | 0 | 0 | 0 | 0 | 0 | 2 | 0 | 0 | 0 | 0 | 0 | 0 |
| 5936 | 5 | Non-insulin dependent diabetes mellitus with nephropathy      | 0 | 0 | 0 | 0 | 0 | 0 | 0 | 0 | 0 | 0 | 0 | 2 | 0 | 0 | 0 | 0 | 0 | 0 |
| 2789 | 1 | Diabetic Charcot arthropathy                                  | 0 | 0 | 0 | 0 | 0 | 0 | 0 | 0 | 0 | 0 | 0 | 2 | 0 | 0 | 0 | 0 | 0 | 0 |
| 6267 | 4 | Type 2 diabetes mellitus with mononeuropathy                  | 0 | 0 | 0 | 0 | 0 | 0 | 0 | 0 | 0 | 0 | 0 | 2 | 0 | 0 | 0 | 0 | 0 | 0 |
| 6974 | 8 | Diabetes mellitus, juvenile type, + ophthalmic manifestation  | 0 | 0 | 0 | 0 | 0 | 0 | 0 | 0 | 0 | 0 | 0 | 2 | 0 | 0 | 0 | 0 | 0 | 0 |
| 1065 | 9 | Diabetic cataract                                             | 0 | 0 | 0 | 0 | 0 | 0 | 0 | 0 | 0 | 0 | 0 | 2 | 0 | 0 | 0 | 0 | 0 | 0 |
| 1159 | 9 | Pan retinal photocoagulation for diabetes                     | 0 | 0 | 0 | 0 | 0 | 0 | 0 | 0 | 0 | 0 | 0 | 2 | 0 | 0 | 0 | 0 | 0 | 0 |
| 5042 | 9 | Non-insulin-dependent diabetes mellitus with ophthalmic comps | 0 | 0 | 0 | 0 | 0 | 0 | 0 | 0 | 0 | 0 | 0 | 2 | 0 | 0 | 0 | 0 | 0 | 0 |
| 6785 | 3 | Diabetes mellitus                                             | 0 | 0 | 0 | 0 | 0 | 0 | 0 | 0 | 0 | 0 | 0 | 2 | 0 | 0 | 0 | 0 | 0 | 0 |
| 5263 | 0 | O/E - sight threatening diabetic retinopathy                  | 0 | 0 | 0 | 0 | 0 | 0 | 0 | 0 | 0 | 0 | 0 | 2 | 0 | 0 | 0 | 0 | 0 | 0 |
| 2198 | 3 | Type 1 diabetes mellitus with renal complications             | 0 | 0 | 0 | 0 | 0 | 0 | 0 | 0 | 0 | 0 | 0 | 2 | 0 | 0 | 0 | 0 | 0 | 0 |
| 6810 | 5 | Type 1 diabetes mellitus with mononeuropathy                  | 0 | 0 | 0 | 0 | 0 | 0 | 0 | 0 | 0 | 0 | 0 | 2 | 0 | 0 | 0 | 0 | 0 | 0 |
| 2483 | 6 | Type 2 diabetes mellitus with nephropathy                     | 0 | 0 | 0 | 0 | 0 | 0 | 0 | 0 | 0 | 0 | 0 | 2 | 0 | 0 | 0 | 0 | 0 | 0 |
| 6546 | 3 | High risk non proliferative diabetic retinopathy              | 0 | 0 | 0 | 0 | 0 | 0 | 0 | 0 | 0 | 0 | 0 | 2 | 0 | 0 | 0 | 0 | 0 | 0 |
| 4732 | 1 | Type 2 diabetes mellitus with ophthalmic complications        | 0 | 0 | 0 | 0 | 0 | 0 | 0 | 0 | 0 | 0 | 0 | 2 | 0 | 0 | 0 | 0 | 0 | 0 |
| 3510 | 7 | Diabetes mellitus with nephropathy NOS                        | 0 | 0 | 0 | 0 | 0 | 0 | 0 | 0 | 0 | 0 | 0 | 2 | 0 | 0 | 0 | 0 | 0 | 0 |
| 2296 | 7 | Retinal abnormality - diabetes related                        | 0 | 0 | 0 | 0 | 0 | 0 | 0 | 0 | 0 | 0 | 0 | 2 | 0 | 0 | 0 | 0 | 0 | 0 |
| 2287 | 1 | Type 1 diabetes mellitus with exudative maculopathy           | 0 | 0 | 0 | 0 | 0 | 0 | 0 | 0 | 0 | 0 | 0 | 2 | 0 | 0 | 0 | 0 | 0 | 0 |
| 2559 | 1 | Type 2 diabetes mellitus with exudative maculopathy           | 0 | 0 | 0 | 0 | 0 | 0 | 0 | 0 | 0 | 0 | 0 | 2 | 0 | 0 | 0 | 0 | 0 | 0 |
| 4737 | 7 | Other specified diabetes mellitus with ophthalmic complicatn  | 0 | 0 | 0 | 0 | 0 | 0 | 0 | 0 | 0 | 0 | 0 | 2 | 0 | 0 | 0 | 0 | 0 | 0 |
| 8599 | 1 | Type II diabetes mellitus with persistent microalbuminuria    | 0 | 0 | 0 | 0 | 0 | 0 | 0 | 0 | 0 | 0 | 0 | 2 | 0 | 0 | 0 | 0 | 0 | 0 |
| 1264 | 0 | Type 2 diabetes mellitus with nephropathy                     | 0 | 0 | 0 | 0 | 0 | 0 | 0 | 0 | 0 | 0 | 0 | 2 | 0 | 0 | 0 | 0 | 0 | 0 |
| 6182 | 9 | Type 1 diabetes mellitus with neurological complications      | 0 | 0 | 0 | 0 | 0 | 0 | 0 | 0 | 0 | 0 | 0 | 2 | 0 | 0 | 0 | 0 | 0 | 0 |
| 9861 | 6 | Type II diabetes mellitus with neurological complications     | 0 | 0 | 0 | 0 | 0 | 0 | 0 | 0 | 0 | 0 | 0 | 2 | 0 | 0 | 0 | 0 | 0 | 0 |



|           |                                                            |   |   |   |   |   |   |   |   |   |   |   |   |   |   |   |   |   |   |
|-----------|------------------------------------------------------------|---|---|---|---|---|---|---|---|---|---|---|---|---|---|---|---|---|---|
| 4171<br>6 | Insulin dependent diabetes mellitus with polyneuropathy    | 0 | 0 | 0 | 0 | 0 | 0 | 0 | 0 | 0 | 0 | 0 | 0 | 2 | 0 | 0 | 0 | 0 | 0 |
| 5052<br>7 | Type II diabetes mellitus with polyneuropathy              | 0 | 0 | 0 | 0 | 0 | 0 | 0 | 0 | 0 | 0 | 0 | 0 | 2 | 0 | 0 | 0 | 0 | 0 |
| 4138<br>9 | Diabetes mellitus, adult onset, + ophthalmic manifestation | 0 | 0 | 0 | 0 | 0 | 0 | 0 | 0 | 0 | 0 | 0 | 0 | 2 | 0 | 0 | 0 | 0 | 0 |
| 1009<br>9 | Advanced diabetic maculopathy                              | 0 | 0 | 0 | 0 | 0 | 0 | 0 | 0 | 0 | 0 | 0 | 0 | 2 | 0 | 0 | 0 | 0 | 0 |
| 5972<br>5 | Type II diabetes mellitus with ophthalmic complications    | 0 | 0 | 0 | 0 | 0 | 0 | 0 | 0 | 0 | 0 | 0 | 0 | 2 | 0 | 0 | 0 | 0 | 0 |
| 5400<br>8 | Type 1 diabetes mellitus with neuropathic arthropathy      | 0 | 0 | 0 | 0 | 0 | 0 | 0 | 0 | 0 | 0 | 0 | 0 | 2 | 0 | 0 | 0 | 0 | 0 |
| 1623<br>0 | Diabetes mellitus with neurological manifestation          | 0 | 0 | 0 | 0 | 0 | 0 | 0 | 0 | 0 | 0 | 0 | 0 | 2 | 0 | 0 | 0 | 0 | 0 |
| 4426<br>0 | Insulin dependent diabetes mellitus with diabetic cataract | 0 | 0 | 0 | 0 | 0 | 0 | 0 | 0 | 0 | 0 | 0 | 0 | 2 | 0 | 0 | 0 | 0 | 0 |
| 2257<br>3 | Diabetes mellitus NOS with neurological manifestation      | 0 | 0 | 0 | 0 | 0 | 0 | 0 | 0 | 0 | 0 | 0 | 0 | 2 | 0 | 0 | 0 | 0 | 0 |
| 1041<br>8 | Type 1 diabetes mellitus with nephropathy                  | 0 | 0 | 0 | 0 | 0 | 0 | 0 | 0 | 0 | 0 | 0 | 0 | 2 | 0 | 0 | 0 | 0 | 0 |
| 1877<br>7 | Type 2 diabetes mellitus with renal complications          | 0 | 0 | 0 | 0 | 0 | 0 | 0 | 0 | 0 | 0 | 0 | 0 | 2 | 0 | 0 | 0 | 0 | 0 |
| 6152<br>3 | Other specified diabetes mellitus with neurological comps  | 0 | 0 | 0 | 0 | 0 | 0 | 0 | 0 | 0 | 0 | 0 | 0 | 2 | 0 | 0 | 0 | 0 | 0 |
| 6790<br>5 | Type II diabetes mellitus with neurological complications  | 0 | 0 | 0 | 0 | 0 | 0 | 0 | 0 | 0 | 0 | 0 | 0 | 2 | 0 | 0 | 0 | 0 | 0 |
| 4955<br>4 | Type 1 diabetes mellitus with diabetic cataract            | 0 | 0 | 0 | 0 | 0 | 0 | 0 | 0 | 0 | 0 | 0 | 0 | 2 | 0 | 0 | 0 | 0 | 0 |
| 4630<br>1 | Type 1 diabetes mellitus with polyneuropathy               | 0 | 0 | 0 | 0 | 0 | 0 | 0 | 0 | 0 | 0 | 0 | 0 | 2 | 0 | 0 | 0 | 0 | 0 |
| 1327<br>9 | Other specified diabetes mellitus with renal complications | 0 | 0 | 0 | 0 | 0 | 0 | 0 | 0 | 0 | 0 | 0 | 0 | 2 | 0 | 0 | 0 | 0 | 0 |
| 7031<br>6 | Type 2 diabetes mellitus with ophthalmic complications     | 0 | 0 | 0 | 0 | 0 | 0 | 0 | 0 | 0 | 0 | 0 | 0 | 2 | 0 | 0 | 0 | 0 | 0 |
| 5727<br>8 | Type II diabetes mellitus with renal complications         | 0 | 0 | 0 | 0 | 0 | 0 | 0 | 0 | 0 | 0 | 0 | 0 | 2 | 0 | 0 | 0 | 0 | 0 |
| 4283<br>1 | Type 1 diabetes mellitus with neurological complications   | 0 | 0 | 0 | 0 | 0 | 0 | 0 | 0 | 0 | 0 | 0 | 0 | 2 | 0 | 0 | 0 | 0 | 0 |
| 3286      | Proliferative diabetic retinopathy                         | 0 | 0 | 0 | 0 | 0 | 0 | 0 | 0 | 0 | 0 | 0 | 0 | 2 | 0 | 0 | 0 | 0 | 0 |
| 9535<br>1 | Type II diabetes mellitus with mononeuropathy              | 0 | 0 | 0 | 0 | 0 | 0 | 0 | 0 | 0 | 0 | 0 | 0 | 2 | 0 | 0 | 0 | 0 | 0 |
| 4764<br>9 | Type 1 diabetes mellitus with ophthalmic complications     | 0 | 0 | 0 | 0 | 0 | 0 | 0 | 0 | 0 | 0 | 0 | 0 | 2 | 0 | 0 | 0 | 0 | 0 |
| 2457<br>1 | Asymptomatic diabetic neuropathy                           | 0 | 0 | 0 | 0 | 0 | 0 | 0 | 0 | 0 | 0 | 0 | 0 | 2 | 0 | 0 | 0 | 0 | 0 |
| 4403<br>3 | Diabetic mononeuritis multiplex                            | 0 | 0 | 0 | 0 | 0 | 0 | 0 | 0 | 0 | 0 | 0 | 0 | 2 | 0 | 0 | 0 | 0 | 0 |

|            |                                                                    |   |   |   |   |   |   |   |   |   |   |   |   |   |   |   |   |   |   |   |
|------------|--------------------------------------------------------------------|---|---|---|---|---|---|---|---|---|---|---|---|---|---|---|---|---|---|---|
| 3931<br>7  | Diabetes mellitus, adult onset, + neurological manifestation       | 0 | 0 | 0 | 0 | 0 | 0 | 0 | 0 | 0 | 0 | 0 | 0 | 2 | 0 | 0 | 0 | 0 | 0 | 0 |
| 4732<br>8  | O/E - right eye stable treated proliferative diabetic retinopathy  | 0 | 0 | 0 | 0 | 0 | 0 | 0 | 0 | 0 | 0 | 0 | 0 | 2 | 0 | 0 | 0 | 0 | 0 | 0 |
| 1143<br>3  | O/E - right eye background diabetic retinopathy                    | 0 | 0 | 0 | 0 | 0 | 0 | 0 | 0 | 0 | 0 | 0 | 0 | 2 | 0 | 0 | 0 | 0 | 0 | 0 |
| 3837       | Diabetic maculopathy                                               | 0 | 0 | 0 | 0 | 0 | 0 | 0 | 0 | 0 | 0 | 0 | 0 | 2 | 0 | 0 | 0 | 0 | 0 | 0 |
| 3510<br>5  | Diabetes mellitus                                                  | 0 | 0 | 0 | 0 | 0 | 0 | 0 | 0 | 0 | 0 | 0 | 0 | 2 | 0 | 0 | 0 | 0 | 0 | 0 |
| 2475       | Diabetic nephropathy                                               | 0 | 0 | 0 | 0 | 0 | 0 | 0 | 0 | 0 | 0 | 0 | 0 | 2 | 0 | 0 | 0 | 0 | 0 | 0 |
| 6167<br>0  | Diabetic mellitus insulin-glucose infarct acute myocardial infarct | 0 | 0 | 0 | 0 | 0 | 0 | 0 | 0 | 0 | 0 | 0 | 0 | 2 | 0 | 0 | 0 | 0 | 0 | 0 |
| 4740<br>9  | Type II diabetes mellitus with polyneuropathy                      | 0 | 0 | 0 | 0 | 0 | 0 | 0 | 0 | 0 | 0 | 0 | 0 | 2 | 0 | 0 | 0 | 0 | 0 | 0 |
| 9387<br>5  | Insulin dependent diabetes mellitus with retinopathy               | 0 | 0 | 0 | 0 | 0 | 0 | 0 | 0 | 0 | 0 | 0 | 0 | 2 | 0 | 0 | 0 | 0 | 0 | 0 |
| 5230<br>3  | Non-insulin-dependent diabetes mellitus with renal complications   | 0 | 0 | 0 | 0 | 0 | 0 | 0 | 0 | 0 | 0 | 0 | 0 | 2 | 0 | 0 | 0 | 0 | 0 | 0 |
| 4498<br>2  | Type 2 diabetes mellitus with diabetic cataract                    | 0 | 0 | 0 | 0 | 0 | 0 | 0 | 0 | 0 | 0 | 0 | 0 | 2 | 0 | 0 | 0 | 0 | 0 | 0 |
| 4591<br>9  | Type 2 diabetes mellitus with neurological complications           | 0 | 0 | 0 | 0 | 0 | 0 | 0 | 0 | 0 | 0 | 0 | 0 | 2 | 0 | 0 | 0 | 0 | 0 | 0 |
| 1309<br>7  | O/E - right eye proliferative diabetic retinopathy                 | 0 | 0 | 0 | 0 | 0 | 0 | 0 | 0 | 0 | 0 | 0 | 0 | 2 | 0 | 0 | 0 | 0 | 0 | 0 |
| 1162<br>6  | Diabetic retinopathy NOS                                           | 0 | 0 | 0 | 0 | 0 | 0 | 0 | 0 | 0 | 0 | 0 | 0 | 2 | 0 | 0 | 0 | 0 | 0 | 0 |
| 5860<br>4  | Type II diabetes mellitus with retinopathy                         | 0 | 0 | 0 | 0 | 0 | 0 | 0 | 0 | 0 | 0 | 0 | 0 | 2 | 0 | 0 | 0 | 0 | 0 | 0 |
| 1754<br>5  | Type I diabetes mellitus with diabetic cataract                    | 0 | 0 | 0 | 0 | 0 | 0 | 0 | 0 | 0 | 0 | 0 | 0 | 2 | 0 | 0 | 0 | 0 | 0 | 0 |
| 1726<br>2  | Non-insulin-dependent diabetes mellitus with retinopathy           | 0 | 0 | 0 | 0 | 0 | 0 | 0 | 0 | 0 | 0 | 0 | 0 | 2 | 0 | 0 | 0 | 0 | 0 | 0 |
| 5990<br>3  | Diabetic amyotrophy                                                | 0 | 0 | 0 | 0 | 0 | 0 | 0 | 0 | 0 | 0 | 0 | 0 | 2 | 0 | 0 | 0 | 0 | 0 | 0 |
| 4758<br>4  | Advanced diabetic retinal disease                                  | 0 | 0 | 0 | 0 | 0 | 0 | 0 | 0 | 0 | 0 | 0 | 0 | 2 | 0 | 0 | 0 | 0 | 0 | 0 |
| 2605<br>4  | Type 2 diabetes mellitus with persistent proteinuria               | 0 | 0 | 0 | 0 | 0 | 0 | 0 | 0 | 0 | 0 | 0 | 0 | 2 | 0 | 0 | 0 | 0 | 0 | 0 |
| 3032<br>3  | Type 1 diabetes mellitus with persistent proteinuria               | 0 | 0 | 0 | 0 | 0 | 0 | 0 | 0 | 0 | 0 | 0 | 0 | 2 | 0 | 0 | 0 | 0 | 0 | 0 |
| 6079<br>6  | Type II diabetes mellitus with persistent proteinuria              | 0 | 0 | 0 | 0 | 0 | 0 | 0 | 0 | 0 | 0 | 0 | 0 | 2 | 0 | 0 | 0 | 0 | 0 | 0 |
| 1026<br>20 | Type I diabetes mellitus with persistent microalbuminuria          | 0 | 0 | 0 | 0 | 0 | 0 | 0 | 0 | 0 | 0 | 0 | 0 | 2 | 0 | 0 | 0 | 0 | 0 | 0 |
| 1839<br>0  | Type 2 diabetes mellitus with persistent microalbuminuria          | 0 | 0 | 0 | 0 | 0 | 0 | 0 | 0 | 0 | 0 | 0 | 0 | 2 | 0 | 0 | 0 | 0 | 0 | 0 |

|      |                                                      |   |   |   |   |   |   |   |   |   |   |   |   |   |   |   |   |   |   |
|------|------------------------------------------------------|---|---|---|---|---|---|---|---|---|---|---|---|---|---|---|---|---|---|
| 318  | Malignant neoplasm of glottis                        | 0 | 0 | 0 | 0 | 0 | 0 | 0 | 0 | 0 | 0 | 0 | 0 | 2 | 0 | 0 | 0 | 0 | 0 |
| 319  | MALIGNANT NEOPLASM OF LARYNX                         | 0 | 0 | 0 | 0 | 0 | 0 | 0 | 0 | 0 | 0 | 0 | 0 | 2 | 0 | 0 | 0 | 0 | 0 |
| 348  | CA FEMALE BREAST                                     | 0 | 0 | 0 | 0 | 0 | 0 | 0 | 0 | 0 | 0 | 0 | 0 | 2 | 0 | 0 | 0 | 0 | 0 |
| 579  | [M]Malignant melanoma NOS                            | 0 | 0 | 0 | 0 | 0 | 0 | 0 | 0 | 0 | 0 | 0 | 0 | 2 | 0 | 0 | 0 | 0 | 0 |
| 779  | MALIGNANT NEOPLASM OF URINARY BLADDER                | 0 | 0 | 0 | 0 | 0 | 0 | 0 | 0 | 0 | 0 | 0 | 0 | 2 | 0 | 0 | 0 | 0 | 0 |
| 780  | Malignant neoplasm of prostate                       | 0 | 0 | 0 | 0 | 0 | 0 | 0 | 0 | 0 | 0 | 0 | 0 | 2 | 0 | 0 | 0 | 0 | 0 |
| 865  | Malignant melanoma of skin                           | 0 | 0 | 0 | 0 | 0 | 0 | 0 | 0 | 0 | 0 | 0 | 0 | 2 | 0 | 0 | 0 | 0 | 0 |
| 876  | Basal cell carcinoma                                 | 0 | 0 | 0 | 0 | 0 | 0 | 0 | 0 | 0 | 0 | 0 | 0 | 2 | 0 | 0 | 0 | 0 | 0 |
| 1056 | MALIGNANT NEOPLASM OF OTHER AND UNSPECIFIED SITE NOS | 0 | 0 | 0 | 0 | 0 | 0 | 0 | 0 | 0 | 0 | 0 | 0 | 2 | 0 | 0 | 0 | 0 | 0 |
| 1062 | Malignant neoplasm of oesophagus                     | 0 | 0 | 0 | 0 | 0 | 0 | 0 | 0 | 0 | 0 | 0 | 0 | 2 | 0 | 0 | 0 | 0 | 0 |
| 1220 | MALIGNANT NEOPLASM OF COLON                          | 0 | 0 | 0 | 0 | 0 | 0 | 0 | 0 | 0 | 0 | 0 | 0 | 2 | 0 | 0 | 0 | 0 | 0 |
| 1599 | Malignant neoplasm of kidney parenchyma              | 0 | 0 | 0 | 0 | 0 | 0 | 0 | 0 | 0 | 0 | 0 | 0 | 2 | 0 | 0 | 0 | 0 | 0 |
| 1624 | [M]SQUAMOUS CELL CARCINOMA NOS                       | 0 | 0 | 0 | 0 | 0 | 0 | 0 | 0 | 0 | 0 | 0 | 0 | 2 | 0 | 0 | 0 | 0 | 0 |
| 1800 | MALIGNANT NEOPLASM OF RECTUM                         | 0 | 0 | 0 | 0 | 0 | 0 | 0 | 0 | 0 | 0 | 0 | 0 | 2 | 0 | 0 | 0 | 0 | 0 |
| 1940 | RODENT ULCER                                         | 0 | 0 | 0 | 0 | 0 | 0 | 0 | 0 | 0 | 0 | 0 | 0 | 2 | 0 | 0 | 0 | 0 | 0 |
| 1986 | CANCER OF OVARY                                      | 0 | 0 | 0 | 0 | 0 | 0 | 0 | 0 | 0 | 0 | 0 | 0 | 2 | 0 | 0 | 0 | 0 | 0 |
| 2123 | [M]Neuroblastoma NOS                                 | 0 | 0 | 0 | 0 | 0 | 0 | 0 | 0 | 0 | 0 | 0 | 0 | 2 | 0 | 0 | 0 | 0 | 0 |
| 2272 | [M]ADENOCARCINOMAS                                   | 0 | 0 | 0 | 0 | 0 | 0 | 0 | 0 | 0 | 0 | 0 | 0 | 2 | 0 | 0 | 0 | 0 | 0 |
| 2492 | Malignant neoplasm of skin NOS                       | 0 | 0 | 0 | 0 | 0 | 0 | 0 | 0 | 0 | 0 | 0 | 0 | 2 | 0 | 0 | 0 | 0 | 0 |
| 2587 | LUNG CANCER                                          | 0 | 0 | 0 | 0 | 0 | 0 | 0 | 0 | 0 | 0 | 0 | 0 | 2 | 0 | 0 | 0 | 0 | 0 |
| 2744 | MALIGNANT NEOPLASM OF UTERUS, PART UNSPECIFIED       | 0 | 0 | 0 | 0 | 0 | 0 | 0 | 0 | 0 | 0 | 0 | 0 | 2 | 0 | 0 | 0 | 0 | 0 |
| 2747 | MALIGNANT NEOPLASM OF CERVIX UTERI                   | 0 | 0 | 0 | 0 | 0 | 0 | 0 | 0 | 0 | 0 | 0 | 0 | 2 | 0 | 0 | 0 | 0 | 0 |
| 2755 | CANCERS                                              | 0 | 0 | 0 | 0 | 0 | 0 | 0 | 0 | 0 | 0 | 0 | 0 | 2 | 0 | 0 | 0 | 0 | 0 |
| 2815 | MALIGNANT NEOPLASM OF SIGMOID COLON                  | 0 | 0 | 0 | 0 | 0 | 0 | 0 | 0 | 0 | 0 | 0 | 0 | 2 | 0 | 0 | 0 | 0 | 0 |
| 2890 | MALIGNANT NEOPLASM OF ENDOMETRIUM OF CORPUS UTERI    | 0 | 0 | 0 | 0 | 0 | 0 | 0 | 0 | 0 | 0 | 0 | 0 | 2 | 0 | 0 | 0 | 0 | 0 |
| 2961 | SEMINOMA OF TESTIS                                   | 0 | 0 | 0 | 0 | 0 | 0 | 0 | 0 | 0 | 0 | 0 | 0 | 2 | 0 | 0 | 0 | 0 | 0 |
| 3028 | [M]Basal cell carcinoma NOS                          | 0 | 0 | 0 | 0 | 0 | 0 | 0 | 0 | 0 | 0 | 0 | 0 | 2 | 0 | 0 | 0 | 0 | 0 |
| 3213 | Malignant neoplasm of corpus uteri                   | 0 | 0 | 0 | 0 | 0 | 0 | 0 | 0 | 0 | 0 | 0 | 0 | 2 | 0 | 0 | 0 | 0 | 0 |
| 3230 | CERVICAL CARCINOMA (UTERUS)                          | 0 | 0 | 0 | 0 | 0 | 0 | 0 | 0 | 0 | 0 | 0 | 0 | 2 | 0 | 0 | 0 | 0 | 0 |

|      |                                                           |   |   |   |   |   |   |   |   |   |   |   |   |   |   |   |   |   |   |   |
|------|-----------------------------------------------------------|---|---|---|---|---|---|---|---|---|---|---|---|---|---|---|---|---|---|---|
| 3357 | Carcinoma of digestive organs and peritoneum              | 0 | 0 | 0 | 0 | 0 | 0 | 0 | 0 | 0 | 0 | 0 | 0 | 0 | 2 | 0 | 0 | 0 | 0 | 0 |
| 3445 | EPITHELIOMA BASAL CELL                                    | 0 | 0 | 0 | 0 | 0 | 0 | 0 | 0 | 0 | 0 | 0 | 0 | 0 | 2 | 0 | 0 | 0 | 0 | 0 |
| 3541 | MALIGNANT NEOPLASM OF PENIS AND OTHER MALE GENITAL ORGANS | 0 | 0 | 0 | 0 | 0 | 0 | 0 | 0 | 0 | 0 | 0 | 0 | 0 | 2 | 0 | 0 | 0 | 0 | 0 |
| 3811 | MALIGNANT NEOPLASM OF CAECUM                              | 0 | 0 | 0 | 0 | 0 | 0 | 0 | 0 | 0 | 0 | 0 | 0 | 0 | 2 | 0 | 0 | 0 | 0 | 0 |
| 3903 | MALIGNANT NEOPLASM OF BRONCHUS OR LUNG NOS                | 0 | 0 | 0 | 0 | 0 | 0 | 0 | 0 | 0 | 0 | 0 | 0 | 0 | 2 | 0 | 0 | 0 | 0 | 0 |
| 3968 | Malignant neoplasm of female breast                       | 0 | 0 | 0 | 0 | 0 | 0 | 0 | 0 | 0 | 0 | 0 | 0 | 0 | 2 | 0 | 0 | 0 | 0 | 0 |
| 3969 | [M]INTRACYSTIC CARCINOMA NOS                              | 0 | 0 | 0 | 0 | 0 | 0 | 0 | 0 | 0 | 0 | 0 | 0 | 0 | 2 | 0 | 0 | 0 | 0 | 0 |
| 4118 | [M]MYXOID CHONDROSARCOMA                                  | 0 | 0 | 0 | 0 | 0 | 0 | 0 | 0 | 0 | 0 | 0 | 0 | 0 | 2 | 0 | 0 | 0 | 0 | 0 |
| 4218 | Malignant neoplasm of parathyroid gland                   | 0 | 0 | 0 | 0 | 0 | 0 | 0 | 0 | 0 | 0 | 0 | 0 | 0 | 2 | 0 | 0 | 0 | 0 | 0 |
| 4388 | Malignant neoplasm of parotid gland                       | 0 | 0 | 0 | 0 | 0 | 0 | 0 | 0 | 0 | 0 | 0 | 0 | 0 | 2 | 0 | 0 | 0 | 0 | 0 |
| 4473 | [M]Ewing's sarcoma                                        | 0 | 0 | 0 | 0 | 0 | 0 | 0 | 0 | 0 | 0 | 0 | 0 | 0 | 2 | 0 | 0 | 0 | 0 | 0 |
| 4554 | Malignant neoplasm of vulva unspecified                   | 0 | 0 | 0 | 0 | 0 | 0 | 0 | 0 | 0 | 0 | 0 | 0 | 0 | 2 | 0 | 0 | 0 | 0 | 0 |
| 4555 | MALIG NEOP OF OTHER AND UNSPECIFIED FEMALE GENITAL ORGANS | 0 | 0 | 0 | 0 | 0 | 0 | 0 | 0 | 0 | 0 | 0 | 0 | 0 | 2 | 0 | 0 | 0 | 0 | 0 |
| 4632 | Other malignant neoplasm of skin                          | 0 | 0 | 0 | 0 | 0 | 0 | 0 | 0 | 0 | 0 | 0 | 0 | 0 | 2 | 0 | 0 | 0 | 0 | 0 |
| 4852 | [M]VERRUCOUS SQUAMOUS CELL CARCINOMA                      | 0 | 0 | 0 | 0 | 0 | 0 | 0 | 0 | 0 | 0 | 0 | 0 | 0 | 2 | 0 | 0 | 0 | 0 | 0 |
| 4865 | OESOPHAGEAL CANCER                                        | 0 | 0 | 0 | 0 | 0 | 0 | 0 | 0 | 0 | 0 | 0 | 0 | 0 | 2 | 0 | 0 | 0 | 0 | 0 |
| 5052 | [M]Osteogenic sarcoma NOS                                 | 0 | 0 | 0 | 0 | 0 | 0 | 0 | 0 | 0 | 0 | 0 | 0 | 0 | 2 | 0 | 0 | 0 | 0 | 0 |
| 5069 | MECKEL'S DIVERTICULUM                                     | 0 | 0 | 0 | 0 | 0 | 0 | 0 | 0 | 0 | 0 | 0 | 0 | 0 | 2 | 0 | 0 | 0 | 0 | 0 |
| 5136 | CHORIOCARCINOMA                                           | 0 | 0 | 0 | 0 | 0 | 0 | 0 | 0 | 0 | 0 | 0 | 0 | 0 | 2 | 0 | 0 | 0 | 0 | 0 |
| 5637 | MALIGNANT NEOPLASM OF THYROID GLAND                       | 0 | 0 | 0 | 0 | 0 | 0 | 0 | 0 | 0 | 0 | 0 | 0 | 0 | 2 | 0 | 0 | 0 | 0 | 0 |
| 5901 | RECTAL CARCINOMA                                          | 0 | 0 | 0 | 0 | 0 | 0 | 0 | 0 | 0 | 0 | 0 | 0 | 0 | 2 | 0 | 0 | 0 | 0 | 0 |
| 6203 | [M]PAPILLARY SEROUS CYSTADENOMA, BORDERLINE MALIGNANCY    | 0 | 0 | 0 | 0 | 0 | 0 | 0 | 0 | 0 | 0 | 0 | 0 | 0 | 2 | 0 | 0 | 0 | 0 | 0 |
| 6436 | [M]Transitional cell carcinoma NOS                        | 0 | 0 | 0 | 0 | 0 | 0 | 0 | 0 | 0 | 0 | 0 | 0 | 0 | 2 | 0 | 0 | 0 | 0 | 0 |
| 6806 | MALIGNANT NEOPLASM OF SMALL INTESTINE AND DUODENUM        | 0 | 0 | 0 | 0 | 0 | 0 | 0 | 0 | 0 | 0 | 0 | 0 | 0 | 2 | 0 | 0 | 0 | 0 | 0 |
| 6935 | Malignant neoplasm of transverse colon                    | 0 | 0 | 0 | 0 | 0 | 0 | 0 | 0 | 0 | 0 | 0 | 0 | 0 | 2 | 0 | 0 | 0 | 0 | 0 |
| 6966 | [M]Spindle cell carcinoma                                 | 0 | 0 | 0 | 0 | 0 | 0 | 0 | 0 | 0 | 0 | 0 | 0 | 0 | 2 | 0 | 0 | 0 | 0 | 0 |
| 7046 | Malignant neoplasm of body of uterus                      | 0 | 0 | 0 | 0 | 0 | 0 | 0 | 0 | 0 | 0 | 0 | 0 | 0 | 2 | 0 | 0 | 0 | 0 | 0 |
| 7219 | CARCINOMA OF RECTUM                                       | 0 | 0 | 0 | 0 | 0 | 0 | 0 | 0 | 0 | 0 | 0 | 0 | 0 | 2 | 0 | 0 | 0 | 0 | 0 |
| 7319 | [M]INFILTRATING DUCTULAR CARCINOMA                        | 0 | 0 | 0 | 0 | 0 | 0 | 0 | 0 | 0 | 0 | 0 | 0 | 0 | 2 | 0 | 0 | 0 | 0 | 0 |

|      |                                                         |   |   |   |   |   |   |   |   |   |   |   |   |   |   |   |   |   |   |
|------|---------------------------------------------------------|---|---|---|---|---|---|---|---|---|---|---|---|---|---|---|---|---|---|
| 7476 | [M]SEMINOMAS                                            | 0 | 0 | 0 | 0 | 0 | 0 | 0 | 0 | 0 | 0 | 0 | 0 | 2 | 0 | 0 | 0 | 0 | 0 |
| 7484 | Mesothelioma                                            | 0 | 0 | 0 | 0 | 0 | 0 | 0 | 0 | 0 | 0 | 0 | 0 | 2 | 0 | 0 | 0 | 0 | 0 |
| 7628 | H/O: cancer                                             | 0 | 0 | 0 | 0 | 0 | 0 | 0 | 0 | 0 | 0 | 0 | 0 | 2 | 0 | 0 | 0 | 0 | 0 |
| 7740 | Seminoma of undescended testis                          | 0 | 0 | 0 | 0 | 0 | 0 | 0 | 0 | 0 | 0 | 0 | 0 | 2 | 0 | 0 | 0 | 0 | 0 |
| 7761 | H/O Malignant melanoma                                  | 0 | 0 | 0 | 0 | 0 | 0 | 0 | 0 | 0 | 0 | 0 | 0 | 2 | 0 | 0 | 0 | 0 | 0 |
| 7805 | MALIGNANT NEOPLASM OF OVARY                             | 0 | 0 | 0 | 0 | 0 | 0 | 0 | 0 | 0 | 0 | 0 | 0 | 2 | 0 | 0 | 0 | 0 | 0 |
| 7856 | [M]DEDIFFERENTIATED LIPOSARCOMA                         | 0 | 0 | 0 | 0 | 0 | 0 | 0 | 0 | 0 | 0 | 0 | 0 | 2 | 0 | 0 | 0 | 0 | 0 |
| 7900 | H/O: carcinoma                                          | 0 | 0 | 0 | 0 | 0 | 0 | 0 | 0 | 0 | 0 | 0 | 0 | 2 | 0 | 0 | 0 | 0 | 0 |
| 7941 | [M]CHONDROSARCOMA NOS                                   | 0 | 0 | 0 | 0 | 0 | 0 | 0 | 0 | 0 | 0 | 0 | 0 | 2 | 0 | 0 | 0 | 0 | 0 |
| 7967 | [M]Squamous cell neoplasms                              | 0 | 0 | 0 | 0 | 0 | 0 | 0 | 0 | 0 | 0 | 0 | 0 | 2 | 0 | 0 | 0 | 0 | 0 |
| 7978 | Hypernephroma                                           | 0 | 0 | 0 | 0 | 0 | 0 | 0 | 0 | 0 | 0 | 0 | 0 | 2 | 0 | 0 | 0 | 0 | 0 |
| 7982 | Malignant neoplasm of common bile duct                  | 0 | 0 | 0 | 0 | 0 | 0 | 0 | 0 | 0 | 0 | 0 | 0 | 2 | 0 | 0 | 0 | 0 | 0 |
| 8085 | [M]SARCOMA NOS                                          | 0 | 0 | 0 | 0 | 0 | 0 | 0 | 0 | 0 | 0 | 0 | 0 | 2 | 0 | 0 | 0 | 0 | 0 |
| 8088 | [M]Fibromyxosarcoma                                     | 0 | 0 | 0 | 0 | 0 | 0 | 0 | 0 | 0 | 0 | 0 | 0 | 2 | 0 | 0 | 0 | 0 | 0 |
| 8166 | MALIGNANT NEOPLASM OF PANCREAS                          | 0 | 0 | 0 | 0 | 0 | 0 | 0 | 0 | 0 | 0 | 0 | 0 | 2 | 0 | 0 | 0 | 0 | 0 |
| 8328 | [M]ASTROCYTOMA, ANAPLASTIC TYPE                         | 0 | 0 | 0 | 0 | 0 | 0 | 0 | 0 | 0 | 0 | 0 | 0 | 2 | 0 | 0 | 0 | 0 | 0 |
| 8351 | [M]Infiltrating duct carcinoma                          | 0 | 0 | 0 | 0 | 0 | 0 | 0 | 0 | 0 | 0 | 0 | 0 | 2 | 0 | 0 | 0 | 0 | 0 |
| 8386 | Malignant neoplasm of stomach                           | 0 | 0 | 0 | 0 | 0 | 0 | 0 | 0 | 0 | 0 | 0 | 0 | 2 | 0 | 0 | 0 | 0 | 0 |
| 8523 | [M]Glioma NOS                                           | 0 | 0 | 0 | 0 | 0 | 0 | 0 | 0 | 0 | 0 | 0 | 0 | 2 | 0 | 0 | 0 | 0 | 0 |
| 8524 | [M]ADENOACANTHOMA                                       | 0 | 0 | 0 | 0 | 0 | 0 | 0 | 0 | 0 | 0 | 0 | 0 | 2 | 0 | 0 | 0 | 0 | 0 |
| 8547 | [M]Astrocytoma NOS                                      | 0 | 0 | 0 | 0 | 0 | 0 | 0 | 0 | 0 | 0 | 0 | 0 | 2 | 0 | 0 | 0 | 0 | 0 |
| 8550 | Malignant neoplasm of pituitary gland                   | 0 | 0 | 0 | 0 | 0 | 0 | 0 | 0 | 0 | 0 | 0 | 0 | 2 | 0 | 0 | 0 | 0 | 0 |
| 8627 | [M]TUMOUR CELLS, MALIGNANT                              | 0 | 0 | 0 | 0 | 0 | 0 | 0 | 0 | 0 | 0 | 0 | 0 | 2 | 0 | 0 | 0 | 0 | 0 |
| 8660 | [M]OSTEOSARCOMA NOS                                     | 0 | 0 | 0 | 0 | 0 | 0 | 0 | 0 | 0 | 0 | 0 | 0 | 2 | 0 | 0 | 0 | 0 | 0 |
| 8693 | Carcinoma of other and unspecified sites                | 0 | 0 | 0 | 0 | 0 | 0 | 0 | 0 | 0 | 0 | 0 | 0 | 2 | 0 | 0 | 0 | 0 | 0 |
| 8695 | [M]Carcinoma NOS                                        | 0 | 0 | 0 | 0 | 0 | 0 | 0 | 0 | 0 | 0 | 0 | 0 | 2 | 0 | 0 | 0 | 0 | 0 |
| 8711 | [M]CHOLANGIOCARCINOMA                                   | 0 | 0 | 0 | 0 | 0 | 0 | 0 | 0 | 0 | 0 | 0 | 0 | 2 | 0 | 0 | 0 | 0 | 0 |
| 8771 | Malignant neoplasm of head of pancreas                  | 0 | 0 | 0 | 0 | 0 | 0 | 0 | 0 | 0 | 0 | 0 | 0 | 2 | 0 | 0 | 0 | 0 | 0 |
| 8918 | Malignant neoplasm of liver and intrahepatic bile ducts | 0 | 0 | 0 | 0 | 0 | 0 | 0 | 0 | 0 | 0 | 0 | 0 | 2 | 0 | 0 | 0 | 0 | 0 |
| 8930 | [M]Adenocarcinoma NOS                                   | 0 | 0 | 0 | 0 | 0 | 0 | 0 | 0 | 0 | 0 | 0 | 0 | 2 | 0 | 0 | 0 | 0 | 0 |

|           |                                                            |   |   |   |   |   |   |   |   |   |   |   |   |   |   |   |   |   |   |   |
|-----------|------------------------------------------------------------|---|---|---|---|---|---|---|---|---|---|---|---|---|---|---|---|---|---|---|
| 9030      | MALIGNANT NEOPLASM OF OTHER AND ILL-DEFINED SITES          | 0 | 0 | 0 | 0 | 0 | 0 | 0 | 0 | 0 | 0 | 0 | 0 | 0 | 2 | 0 | 0 | 0 | 0 | 0 |
| 9088      | MALIGNANT NEOPLASM OF HEPATIC FLEXURE OF COLON             | 0 | 0 | 0 | 0 | 0 | 0 | 0 | 0 | 0 | 0 | 0 | 0 | 0 | 2 | 0 | 0 | 0 | 0 | 0 |
| 9118      | COLONIC CANCER                                             | 0 | 0 | 0 | 0 | 0 | 0 | 0 | 0 | 0 | 0 | 0 | 0 | 0 | 2 | 0 | 0 | 0 | 0 | 0 |
| 9156      | [M]Oat cell carcinoma                                      | 0 | 0 | 0 | 0 | 0 | 0 | 0 | 0 | 0 | 0 | 0 | 0 | 0 | 2 | 0 | 0 | 0 | 0 | 0 |
| 9237      | Malignant neoplasm of larynx NOS                           | 0 | 0 | 0 | 0 | 0 | 0 | 0 | 0 | 0 | 0 | 0 | 0 | 0 | 2 | 0 | 0 | 0 | 0 | 0 |
| 9291      | [M]Small cell carcinoma NOS                                | 0 | 0 | 0 | 0 | 0 | 0 | 0 | 0 | 0 | 0 | 0 | 0 | 0 | 2 | 0 | 0 | 0 | 0 | 0 |
| 9444      | [V]Personal history of malignant neoplasm of genital organ | 0 | 0 | 0 | 0 | 0 | 0 | 0 | 0 | 0 | 0 | 0 | 0 | 0 | 2 | 0 | 0 | 0 | 0 | 0 |
| 9447      | [M]ENDOMETRIOID CARCINOMA                                  | 0 | 0 | 0 | 0 | 0 | 0 | 0 | 0 | 0 | 0 | 0 | 0 | 0 | 2 | 0 | 0 | 0 | 0 | 0 |
| 9470      | MALIGNANT NEOPLASM OF FEMALE BREAST NOS                    | 0 | 0 | 0 | 0 | 0 | 0 | 0 | 0 | 0 | 0 | 0 | 0 | 0 | 2 | 0 | 0 | 0 | 0 | 0 |
| 9491      | ANAL CARCINOMA                                             | 0 | 0 | 0 | 0 | 0 | 0 | 0 | 0 | 0 | 0 | 0 | 0 | 0 | 2 | 0 | 0 | 0 | 0 | 0 |
| 9575      | [M]GLIOBLASTOMA MULTIFORME                                 | 0 | 0 | 0 | 0 | 0 | 0 | 0 | 0 | 0 | 0 | 0 | 0 | 0 | 2 | 0 | 0 | 0 | 0 | 0 |
| 9600      | MESOTHELIOMA OF PLEURA                                     | 0 | 0 | 0 | 0 | 0 | 0 | 0 | 0 | 0 | 0 | 0 | 0 | 0 | 2 | 0 | 0 | 0 | 0 | 0 |
| 9622      | Malignant neoplasm of cauda equina                         | 0 | 0 | 0 | 0 | 0 | 0 | 0 | 0 | 0 | 0 | 0 | 0 | 0 | 2 | 0 | 0 | 0 | 0 | 0 |
| 9712      | [M]Papillary transitional cell carcinoma                   | 0 | 0 | 0 | 0 | 0 | 0 | 0 | 0 | 0 | 0 | 0 | 0 | 0 | 2 | 0 | 0 | 0 | 0 | 0 |
| 9815      | [X]Personal history of other neoplasms                     | 0 | 0 | 0 | 0 | 0 | 0 | 0 | 0 | 0 | 0 | 0 | 0 | 0 | 2 | 0 | 0 | 0 | 0 | 0 |
| 9859      | [M]Seminoma NOS                                            | 0 | 0 | 0 | 0 | 0 | 0 | 0 | 0 | 0 | 0 | 0 | 0 | 0 | 2 | 0 | 0 | 0 | 0 | 0 |
| 9885      | [M]Basal cell carcinoma                                    | 0 | 0 | 0 | 0 | 0 | 0 | 0 | 0 | 0 | 0 | 0 | 0 | 0 | 2 | 0 | 0 | 0 | 0 | 0 |
| 9902      | CARCINOMA OF BONE, CONNECTIVE TISSUE, SKIN AND BREAST      | 0 | 0 | 0 | 0 | 0 | 0 | 0 | 0 | 0 | 0 | 0 | 0 | 0 | 2 | 0 | 0 | 0 | 0 | 0 |
| 9965      | CANCER CARE PLAN                                           | 0 | 0 | 0 | 0 | 0 | 0 | 0 | 0 | 0 | 0 | 0 | 0 | 0 | 2 | 0 | 0 | 0 | 0 | 0 |
| 9984      | Carcinoma of lip                                           | 0 | 0 | 0 | 0 | 0 | 0 | 0 | 0 | 0 | 0 | 0 | 0 | 0 | 2 | 0 | 0 | 0 | 0 | 0 |
| 1017<br>8 | Gleason grading of prostate cancer                         | 0 | 0 | 0 | 0 | 0 | 0 | 0 | 0 | 0 | 0 | 0 | 0 | 0 | 2 | 0 | 0 | 0 | 0 | 0 |
| 1028<br>3 | Malignant neoplasm of tongue                               | 0 | 0 | 0 | 0 | 0 | 0 | 0 | 0 | 0 | 0 | 0 | 0 | 0 | 2 | 0 | 0 | 0 | 0 | 0 |
| 1033<br>2 | CANCER PRIMARY HEALTHCARE MULTIDISCIPLINARY TEAM           | 0 | 0 | 0 | 0 | 0 | 0 | 0 | 0 | 0 | 0 | 0 | 0 | 0 | 2 | 0 | 0 | 0 | 0 | 0 |
| 1033<br>5 | CANCER CONFIRMED                                           | 0 | 0 | 0 | 0 | 0 | 0 | 0 | 0 | 0 | 0 | 0 | 0 | 0 | 2 | 0 | 0 | 0 | 0 | 0 |
| 1035<br>8 | MALIGNANT NEOPLASM OF UPPER LOBE, BRONCHUS OR LUNG         | 0 | 0 | 0 | 0 | 0 | 0 | 0 | 0 | 0 | 0 | 0 | 0 | 0 | 2 | 0 | 0 | 0 | 0 | 0 |
| 1054<br>1 | [M]PAPILLARY CARCINOMA NOS                                 | 0 | 0 | 0 | 0 | 0 | 0 | 0 | 0 | 0 | 0 | 0 | 0 | 0 | 2 | 0 | 0 | 0 | 0 | 0 |
| 1058<br>8 | [M]LEIOMYOSARCOMA NOS                                      | 0 | 0 | 0 | 0 | 0 | 0 | 0 | 0 | 0 | 0 | 0 | 0 | 0 | 2 | 0 | 0 | 0 | 0 | 0 |



|           |                                                              |   |   |   |   |   |   |   |   |   |   |   |   |   |   |   |   |   |
|-----------|--------------------------------------------------------------|---|---|---|---|---|---|---|---|---|---|---|---|---|---|---|---|---|
| 1249<br>9 | [X]Malignant neoplasm of breast                              | 0 | 0 | 0 | 0 | 0 | 0 | 0 | 0 | 0 | 0 | 0 | 0 | 2 | 0 | 0 | 0 | 0 |
| 1253<br>9 | SARCOMA OF BONE AND CONNECTIVE TISSUE                        | 0 | 0 | 0 | 0 | 0 | 0 | 0 | 0 | 0 | 0 | 0 | 0 | 2 | 0 | 0 | 0 | 0 |
| 1258<br>0 | [M]ADENOSQUAMOUS CARCINOMA                                   | 0 | 0 | 0 | 0 | 0 | 0 | 0 | 0 | 0 | 0 | 0 | 0 | 2 | 0 | 0 | 0 | 0 |
| 1258<br>2 | MALIGNANT NEOPLASM OF LOWER LOBE OF LUNG                     | 0 | 0 | 0 | 0 | 0 | 0 | 0 | 0 | 0 | 0 | 0 | 0 | 2 | 0 | 0 | 0 | 0 |
| 1260<br>9 | [M]CARCINOMA, ANAPLASTIC TYPE, NOS                           | 0 | 0 | 0 | 0 | 0 | 0 | 0 | 0 | 0 | 0 | 0 | 0 | 2 | 0 | 0 | 0 | 0 |
| 1287<br>0 | MALIGNANT NEOPLASM OF MAIN BRONCHUS                          | 0 | 0 | 0 | 0 | 0 | 0 | 0 | 0 | 0 | 0 | 0 | 0 | 2 | 0 | 0 | 0 | 0 |
| 1324<br>3 | Malignant neoplasm of trachea, bronchus and lung             | 0 | 0 | 0 | 0 | 0 | 0 | 0 | 0 | 0 | 0 | 0 | 0 | 2 | 0 | 0 | 0 | 0 |
| 1325<br>2 | Malignant neoplasm of genitourinary organ                    | 0 | 0 | 0 | 0 | 0 | 0 | 0 | 0 | 0 | 0 | 0 | 0 | 2 | 0 | 0 | 0 | 0 |
| 1355<br>9 | Malig neop of kidney and other unspecified urinary organs    | 0 | 0 | 0 | 0 | 0 | 0 | 0 | 0 | 0 | 0 | 0 | 0 | 2 | 0 | 0 | 0 | 0 |
| 1357<br>4 | [M]METATYPICAL CARCINOMA                                     | 0 | 0 | 0 | 0 | 0 | 0 | 0 | 0 | 0 | 0 | 0 | 0 | 2 | 0 | 0 | 0 | 0 |
| 1471<br>2 | MALIGNANT NEOPLASM OF LIP                                    | 0 | 0 | 0 | 0 | 0 | 0 | 0 | 0 | 0 | 0 | 0 | 0 | 2 | 0 | 0 | 0 | 0 |
| 1479<br>2 | MALIGNANT NEOPLASM OF OTHER AND UNSPECIFIED PARTS OF MOUTH   | 0 | 0 | 0 | 0 | 0 | 0 | 0 | 0 | 0 | 0 | 0 | 0 | 2 | 0 | 0 | 0 | 0 |
| 1480<br>0 | Malignant neoplasm of stomach NOS                            | 0 | 0 | 0 | 0 | 0 | 0 | 0 | 0 | 0 | 0 | 0 | 0 | 2 | 0 | 0 | 0 | 0 |
| 1514<br>8 | Malignant neoplasm of testis                                 | 0 | 0 | 0 | 0 | 0 | 0 | 0 | 0 | 0 | 0 | 0 | 0 | 2 | 0 | 0 | 0 | 0 |
| 1518<br>2 | Malignant neoplasm of connective and soft tissue, site NOS   | 0 | 0 | 0 | 0 | 0 | 0 | 0 | 0 | 0 | 0 | 0 | 0 | 2 | 0 | 0 | 0 | 0 |
| 1522<br>1 | MALIGNANT NEOPLASM OF TRACHEA                                | 0 | 0 | 0 | 0 | 0 | 0 | 0 | 0 | 0 | 0 | 0 | 0 | 2 | 0 | 0 | 0 | 0 |
| 1522<br>3 | MALIGNANT NEOPLASM OF URETER                                 | 0 | 0 | 0 | 0 | 0 | 0 | 0 | 0 | 0 | 0 | 0 | 0 | 2 | 0 | 0 | 0 | 0 |
| 1541<br>9 | [M]Hypernephroma                                             | 0 | 0 | 0 | 0 | 0 | 0 | 0 | 0 | 0 | 0 | 0 | 0 | 2 | 0 | 0 | 0 | 0 |
| 1564<br>4 | MALIGNANT NEOPLASM OF URETHRA                                | 0 | 0 | 0 | 0 | 0 | 0 | 0 | 0 | 0 | 0 | 0 | 0 | 2 | 0 | 0 | 0 | 0 |
| 1568<br>4 | Malignant neoplasm of frontal sinus                          | 0 | 0 | 0 | 0 | 0 | 0 | 0 | 0 | 0 | 0 | 0 | 0 | 2 | 0 | 0 | 0 | 0 |
| 1570<br>9 | Malignant neoplasm of digestive organs and peritoneum        | 0 | 0 | 0 | 0 | 0 | 0 | 0 | 0 | 0 | 0 | 0 | 0 | 2 | 0 | 0 | 0 | 0 |
| 1571<br>1 | Malignant neoplasm cerebrum (excluding lobes and ventricles) | 0 | 0 | 0 | 0 | 0 | 0 | 0 | 0 | 0 | 0 | 0 | 0 | 2 | 0 | 0 | 0 | 0 |
| 1586<br>8 | MALIGNANT NEOPLASM OF SKIN OF TRUNK, EXCLUDING SCROTUM, NOS  | 0 | 0 | 0 | 0 | 0 | 0 | 0 | 0 | 0 | 0 | 0 | 0 | 2 | 0 | 0 | 0 | 0 |



|           |                                                                  |   |   |   |   |   |   |   |   |   |   |   |   |   |   |   |   |   |   |
|-----------|------------------------------------------------------------------|---|---|---|---|---|---|---|---|---|---|---|---|---|---|---|---|---|---|
| 1590<br>7 | MALIGNANT NEOPLASM<br>GALLBLADDER/EXTRAHEPATIC BILE DUCTS<br>NOS | 0 | 0 | 0 | 0 | 0 | 0 | 0 | 0 | 0 | 0 | 0 | 0 | 0 | 2 | 0 | 0 | 0 | 0 |
| 1597<br>6 | MALIGNANT NEOPLASM OF ABDOMEN                                    | 0 | 0 | 0 | 0 | 0 | 0 | 0 | 0 | 0 | 0 | 0 | 0 | 0 | 2 | 0 | 0 | 0 | 0 |
| 1599<br>1 | Malignant neoplasm of choroid                                    | 0 | 0 | 0 | 0 | 0 | 0 | 0 | 0 | 0 | 0 | 0 | 0 | 0 | 2 | 0 | 0 | 0 | 0 |
| 1607<br>5 | MALIGNANT NEOPLASM OF BONE AND<br>ARTICULAR CARTILAGE NOS        | 0 | 0 | 0 | 0 | 0 | 0 | 0 | 0 | 0 | 0 | 0 | 0 | 0 | 2 | 0 | 0 | 0 | 0 |
| 1610<br>5 | MALIGNANT NEOPLASM OF GALLBLADDER                                | 0 | 0 | 0 | 0 | 0 | 0 | 0 | 0 | 0 | 0 | 0 | 0 | 0 | 2 | 0 | 0 | 0 | 0 |
| 1612<br>6 | PRIMARY CARCINOMA OF LIVER                                       | 0 | 0 | 0 | 0 | 0 | 0 | 0 | 0 | 0 | 0 | 0 | 0 | 0 | 2 | 0 | 0 | 0 | 0 |
| 1614<br>6 | [M]Adenocarcinoma with squamous<br>metaplasia                    | 0 | 0 | 0 | 0 | 0 | 0 | 0 | 0 | 0 | 0 | 0 | 0 | 0 | 2 | 0 | 0 | 0 | 0 |
| 1620<br>2 | MALIGNANT NEOPLASM OF SKIN OF NOSE<br>(EXTERNAL)                 | 0 | 0 | 0 | 0 | 0 | 0 | 0 | 0 | 0 | 0 | 0 | 0 | 0 | 2 | 0 | 0 | 0 | 0 |
| 1624<br>1 | MALIGNANT NEOPLASM OF TONSIL                                     | 0 | 0 | 0 | 0 | 0 | 0 | 0 | 0 | 0 | 0 | 0 | 0 | 0 | 2 | 0 | 0 | 0 | 0 |
| 1628<br>0 | MALIGNANT NEOPLASM OF NECK NOS                                   | 0 | 0 | 0 | 0 | 0 | 0 | 0 | 0 | 0 | 0 | 0 | 0 | 0 | 2 | 0 | 0 | 0 | 0 |
| 1629<br>7 | Malignant neoplasm of pharynx unspecified                        | 0 | 0 | 0 | 0 | 0 | 0 | 0 | 0 | 0 | 0 | 0 | 0 | 0 | 2 | 0 | 0 | 0 | 0 |
| 1629<br>8 | Malignant neoplasm of retroperitoneum and<br>peritoneum NOS      | 0 | 0 | 0 | 0 | 0 | 0 | 0 | 0 | 0 | 0 | 0 | 0 | 0 | 2 | 0 | 0 | 0 | 0 |
| 1663<br>9 | [V]Personal history of malignant neoplasm of<br>breast           | 0 | 0 | 0 | 0 | 0 | 0 | 0 | 0 | 0 | 0 | 0 | 0 | 0 | 2 | 0 | 0 | 0 | 0 |
| 1667<br>7 | [M]MEDULLARY CARCINOMA NOS                                       | 0 | 0 | 0 | 0 | 0 | 0 | 0 | 0 | 0 | 0 | 0 | 0 | 0 | 2 | 0 | 0 | 0 | 0 |
| 1670<br>4 | Malignant neoplasm of vertebral column                           | 0 | 0 | 0 | 0 | 0 | 0 | 0 | 0 | 0 | 0 | 0 | 0 | 0 | 2 | 0 | 0 | 0 | 0 |
| 1672<br>3 | [M]BRONCHIOLAR CARCINOMA                                         | 0 | 0 | 0 | 0 | 0 | 0 | 0 | 0 | 0 | 0 | 0 | 0 | 0 | 2 | 0 | 0 | 0 | 0 |
| 1687<br>4 | CARCINOMA OF GENITOURINARY ORGAN                                 | 0 | 0 | 0 | 0 | 0 | 0 | 0 | 0 | 0 | 0 | 0 | 0 | 0 | 2 | 0 | 0 | 0 | 0 |
| 1690<br>2 | [M]Basal cell adenocarcinoma                                     | 0 | 0 | 0 | 0 | 0 | 0 | 0 | 0 | 0 | 0 | 0 | 0 | 0 | 2 | 0 | 0 | 0 | 0 |
| 1691<br>5 | Malignant neoplasm of intrahepatic bile ducts                    | 0 | 0 | 0 | 0 | 0 | 0 | 0 | 0 | 0 | 0 | 0 | 0 | 0 | 2 | 0 | 0 | 0 | 0 |
| 1696<br>7 | Malignant neoplasm of overlapping lesion of<br>corpus uteri      | 0 | 0 | 0 | 0 | 0 | 0 | 0 | 0 | 0 | 0 | 0 | 0 | 0 | 2 | 0 | 0 | 0 | 0 |
| 1706<br>4 | H/O: malignant neoplasm (*)                                      | 0 | 0 | 0 | 0 | 0 | 0 | 0 | 0 | 0 | 0 | 0 | 0 | 0 | 2 | 0 | 0 | 0 | 0 |
| 1721<br>2 | [M]RHABDOID SARCOMA                                              | 0 | 0 | 0 | 0 | 0 | 0 | 0 | 0 | 0 | 0 | 0 | 0 | 0 | 2 | 0 | 0 | 0 | 0 |
| 1723<br>2 | [M]Amelanotic melanoma                                           | 0 | 0 | 0 | 0 | 0 | 0 | 0 | 0 | 0 | 0 | 0 | 0 | 0 | 2 | 0 | 0 | 0 | 0 |



|      |   |                                                           |   |   |   |   |   |   |   |   |   |   |   |   |   |   |   |   |   |
|------|---|-----------------------------------------------------------|---|---|---|---|---|---|---|---|---|---|---|---|---|---|---|---|---|
| 1909 | 2 | Dukes stage B                                             | 0 | 0 | 0 | 0 | 0 | 0 | 0 | 0 | 0 | 0 | 0 | 0 | 2 | 0 | 0 | 0 | 0 |
| 1914 | 1 | Malignant neoplasm of ovary and other uterine adnexa      | 0 | 0 | 0 | 0 | 0 | 0 | 0 | 0 | 0 | 0 | 0 | 0 | 2 | 0 | 0 | 0 | 0 |
| 1914 | 4 | [X]Melanoma and other malignant neoplasms of skin         | 0 | 0 | 0 | 0 | 0 | 0 | 0 | 0 | 0 | 0 | 0 | 0 | 2 | 0 | 0 | 0 | 0 |
| 1916 | 2 | Malignant neoplasm of anterior wall of urinary bladder    | 0 | 0 | 0 | 0 | 0 | 0 | 0 | 0 | 0 | 0 | 0 | 0 | 2 | 0 | 0 | 0 | 0 |
| 1922 | 6 | Malignant neoplasm of parietal lobe                       | 0 | 0 | 0 | 0 | 0 | 0 | 0 | 0 | 0 | 0 | 0 | 0 | 2 | 0 | 0 | 0 | 0 |
| 1931 | 8 | Malignant neoplasm of pyloric antrum of stomach           | 0 | 0 | 0 | 0 | 0 | 0 | 0 | 0 | 0 | 0 | 0 | 0 | 2 | 0 | 0 | 0 | 0 |
| 1932 | 1 | MALIGNANT NEOPLASM OF CONNECTIVE AND SOFT TISSUE OF HAND  | 0 | 0 | 0 | 0 | 0 | 0 | 0 | 0 | 0 | 0 | 0 | 0 | 2 | 0 | 0 | 0 | 0 |
| 1933 | 4 | [M]Carcinoma NOS                                          | 0 | 0 | 0 | 0 | 0 | 0 | 0 | 0 | 0 | 0 | 0 | 0 | 2 | 0 | 0 | 0 | 0 |
| 1938 | 9 | MALIG NEOP OF BONE, CONNECTIVE TISSUE, SKIN AND BREAST OS | 0 | 0 | 0 | 0 | 0 | 0 | 0 | 0 | 0 | 0 | 0 | 0 | 2 | 0 | 0 | 0 | 0 |
| 1941 | 5 | MALIGNANT NEOPLASM OF LIP, ORAL CAVITY AND PHARYNX        | 0 | 0 | 0 | 0 | 0 | 0 | 0 | 0 | 0 | 0 | 0 | 0 | 2 | 0 | 0 | 0 | 0 |
| 1942 | 3 | MALIGNANT NEOPLASM OF MALE BREAST                         | 0 | 0 | 0 | 0 | 0 | 0 | 0 | 0 | 0 | 0 | 0 | 0 | 2 | 0 | 0 | 0 | 0 |
| 1943 | 7 | Osteosarcoma                                              | 0 | 0 | 0 | 0 | 0 | 0 | 0 | 0 | 0 | 0 | 0 | 0 | 2 | 0 | 0 | 0 | 0 |
| 1944 | 4 | [X]MALIGNANT MELANOMA OF SKIN, UNSPECIFIED                | 0 | 0 | 0 | 0 | 0 | 0 | 0 | 0 | 0 | 0 | 0 | 0 | 2 | 0 | 0 | 0 | 0 |
| 1947 | 5 | Malignant neoplasm of descended testis                    | 0 | 0 | 0 | 0 | 0 | 0 | 0 | 0 | 0 | 0 | 0 | 0 | 2 | 0 | 0 | 0 | 0 |
| 2008 | 4 | [M]EPENDYMOMA NOS                                         | 0 | 0 | 0 | 0 | 0 | 0 | 0 | 0 | 0 | 0 | 0 | 0 | 2 | 0 | 0 | 0 | 0 |
| 2009 | 2 | Malignant neoplasm of floor of mouth                      | 0 | 0 | 0 | 0 | 0 | 0 | 0 | 0 | 0 | 0 | 0 | 0 | 2 | 0 | 0 | 0 | 0 |
| 2016 | 0 | MALIGNANT NEOPLASM OF EYE                                 | 0 | 0 | 0 | 0 | 0 | 0 | 0 | 0 | 0 | 0 | 0 | 0 | 2 | 0 | 0 | 0 | 0 |
| 2016 | 6 | Malignant neoplasm of female genital organ NOS            | 0 | 0 | 0 | 0 | 0 | 0 | 0 | 0 | 0 | 0 | 0 | 0 | 2 | 0 | 0 | 0 | 0 |
| 2017 | 0 | Pancoast's syndrome                                       | 0 | 0 | 0 | 0 | 0 | 0 | 0 | 0 | 0 | 0 | 0 | 0 | 2 | 0 | 0 | 0 | 0 |
| 2029 | 2 | Malignant neoplasm of major salivary glands               | 0 | 0 | 0 | 0 | 0 | 0 | 0 | 0 | 0 | 0 | 0 | 0 | 2 | 0 | 0 | 0 | 0 |
| 2035 | 0 | [M]YOLK SAC TUMOUR                                        | 0 | 0 | 0 | 0 | 0 | 0 | 0 | 0 | 0 | 0 | 0 | 0 | 2 | 0 | 0 | 0 | 0 |
| 2068 | 5 | Malignant neoplasm of axillary tail of female breast      | 0 | 0 | 0 | 0 | 0 | 0 | 0 | 0 | 0 | 0 | 0 | 0 | 2 | 0 | 0 | 0 | 0 |
| 2080 | 7 | [M]PAPILLARY SQUAMOUS CELL CARCINOMA                      | 0 | 0 | 0 | 0 | 0 | 0 | 0 | 0 | 0 | 0 | 0 | 0 | 2 | 0 | 0 | 0 | 0 |
| 2098 | 2 | [M]Nodular melanoma                                       | 0 | 0 | 0 | 0 | 0 | 0 | 0 | 0 | 0 | 0 | 0 | 0 | 2 | 0 | 0 | 0 | 0 |

|           |                                              |   |   |   |   |   |   |   |   |   |   |   |   |   |   |   |   |   |   |   |
|-----------|----------------------------------------------|---|---|---|---|---|---|---|---|---|---|---|---|---|---|---|---|---|---|---|
| 2113<br>1 | [M]SEROUS CYSTADENOMA, BORDERLINE MALIGNANCY | 0 | 0 | 0 | 0 | 0 | 0 | 0 | 0 | 0 | 0 | 0 | 0 | 0 | 2 | 0 | 0 | 0 | 0 | 0 |
| 2117<br>3 | [M]Mullerian mixed tumour                    | 0 | 0 | 0 | 0 | 0 | 0 | 0 | 0 | 0 | 0 | 0 | 0 | 0 | 2 | 0 | 0 | 0 | 0 | 0 |
| 2121<br>7 | [M]Small cell-large cell carcinoma           | 0 | 0 | 0 | 0 | 0 | 0 | 0 | 0 | 0 | 0 | 0 | 0 | 0 | 2 | 0 | 0 | 0 | 0 | 0 |
| 2132<br>7 | MALIGNANT NEOPLASM OF SKIN OF TEMPLE         | 0 | 0 | 0 | 0 | 0 | 0 | 0 | 0 | 0 | 0 | 0 | 0 | 0 | 2 | 0 | 0 | 0 | 0 | 0 |
| 2133<br>0 | Malignant neoplasm of retroperitoneum        | 0 | 0 | 0 | 0 | 0 | 0 | 0 | 0 | 0 | 0 | 0 | 0 | 0 | 2 | 0 | 0 | 0 | 0 | 0 |
| 2144<br>7 | [M]FIBROBLASTIC OSTEOSARCOMA                 | 0 | 0 | 0 | 0 | 0 | 0 | 0 | 0 | 0 | 0 | 0 | 0 | 0 | 2 | 0 | 0 | 0 | 0 | 0 |
| 2160<br>9 | [M]Carcinoma                                 | 0 | 0 | 0 | 0 | 0 | 0 | 0 | 0 | 0 | 0 | 0 | 0 | 0 | 2 | 0 | 0 | 0 | 0 | 0 |
| 2162<br>0 | Malignant neoplasm of pylorus of stomach     | 0 | 0 | 0 | 0 | 0 | 0 | 0 | 0 | 0 | 0 | 0 | 0 | 0 | 2 | 0 | 0 | 0 | 0 | 0 |
| 2168<br>1 | [M]Nephroblastoma NOS                        | 0 | 0 | 0 | 0 | 0 | 0 | 0 | 0 | 0 | 0 | 0 | 0 | 0 | 2 | 0 | 0 | 0 | 0 | 0 |
| 2168<br>2 | [M]MALIGNANT TERATOMA, INTERMEDIATE TYPE     | 0 | 0 | 0 | 0 | 0 | 0 | 0 | 0 | 0 | 0 | 0 | 0 | 0 | 2 | 0 | 0 | 0 | 0 | 0 |
| 2169<br>8 | Malignant neoplasm of main bronchus NOS      | 0 | 0 | 0 | 0 | 0 | 0 | 0 | 0 | 0 | 0 | 0 | 0 | 0 | 2 | 0 | 0 | 0 | 0 | 0 |
| 2171<br>5 | [X]MESOTHELIOMA OF LUNG                      | 0 | 0 | 0 | 0 | 0 | 0 | 0 | 0 | 0 | 0 | 0 | 0 | 0 | 2 | 0 | 0 | 0 | 0 | 0 |
| 2173<br>2 | [M]MYXOSARCOMA                               | 0 | 0 | 0 | 0 | 0 | 0 | 0 | 0 | 0 | 0 | 0 | 0 | 0 | 2 | 0 | 0 | 0 | 0 | 0 |
| 2174<br>1 | [M]Follicular adenocarcinoma NOS             | 0 | 0 | 0 | 0 | 0 | 0 | 0 | 0 | 0 | 0 | 0 | 0 | 0 | 2 | 0 | 0 | 0 | 0 | 0 |
| 2175<br>8 | [M]Chordoma                                  | 0 | 0 | 0 | 0 | 0 | 0 | 0 | 0 | 0 | 0 | 0 | 0 | 0 | 2 | 0 | 0 | 0 | 0 | 0 |
| 2177<br>0 | [M]MESOTHELIOMA, UNSPECIFIED                 | 0 | 0 | 0 | 0 | 0 | 0 | 0 | 0 | 0 | 0 | 0 | 0 | 0 | 2 | 0 | 0 | 0 | 0 | 0 |
| 2178<br>6 | Seminoma of descended testis                 | 0 | 0 | 0 | 0 | 0 | 0 | 0 | 0 | 0 | 0 | 0 | 0 | 0 | 2 | 0 | 0 | 0 | 0 | 0 |
| 2183<br>3 | [M]Duct carcinoma NOS                        | 0 | 0 | 0 | 0 | 0 | 0 | 0 | 0 | 0 | 0 | 0 | 0 | 0 | 2 | 0 | 0 | 0 | 0 | 0 |
| 2184<br>7 | [M]Follicular carcinoma                      | 0 | 0 | 0 | 0 | 0 | 0 | 0 | 0 | 0 | 0 | 0 | 0 | 0 | 2 | 0 | 0 | 0 | 0 | 0 |
| 2186<br>8 | [M]Neoplasm, malignant                       | 0 | 0 | 0 | 0 | 0 | 0 | 0 | 0 | 0 | 0 | 0 | 0 | 0 | 2 | 0 | 0 | 0 | 0 | 0 |
| 2191<br>4 | [M]Intraepithelial carcinoma NOS             | 0 | 0 | 0 | 0 | 0 | 0 | 0 | 0 | 0 | 0 | 0 | 0 | 0 | 2 | 0 | 0 | 0 | 0 | 0 |
| 2215<br>6 | [M]MALIGNANT TUMOUR, SMALL CELL TYPE         | 0 | 0 | 0 | 0 | 0 | 0 | 0 | 0 | 0 | 0 | 0 | 0 | 0 | 2 | 0 | 0 | 0 | 0 | 0 |
| 2216<br>3 | Carcinoma of caecum                          | 0 | 0 | 0 | 0 | 0 | 0 | 0 | 0 | 0 | 0 | 0 | 0 | 0 | 2 | 0 | 0 | 0 | 0 | 0 |
| 2218<br>7 | HEPATOCELLULAR CARCINOMA                     | 0 | 0 | 0 | 0 | 0 | 0 | 0 | 0 | 0 | 0 | 0 | 0 | 0 | 2 | 0 | 0 | 0 | 0 | 0 |

|           |                                                              |   |   |   |   |   |   |   |   |   |   |   |   |   |   |   |   |   |   |
|-----------|--------------------------------------------------------------|---|---|---|---|---|---|---|---|---|---|---|---|---|---|---|---|---|---|
| 2229<br>0 | MALIGNANT NEOPLASM OF CONNECTIVE AND SOFT TISSUE OF THORAX   | 0 | 0 | 0 | 0 | 0 | 0 | 0 | 0 | 0 | 0 | 0 | 0 | 2 | 0 | 0 | 0 | 0 | 0 |
| 2238<br>2 | CANCER DIAGNOSIS DISCUSSED WITH PATIENT                      | 0 | 0 | 0 | 0 | 0 | 0 | 0 | 0 | 0 | 0 | 0 | 0 | 2 | 0 | 0 | 0 | 0 | 0 |
| 2244<br>1 | MALIGNANT NEOPLASM OF SUBGLOTTIS                             | 0 | 0 | 0 | 0 | 0 | 0 | 0 | 0 | 0 | 0 | 0 | 0 | 2 | 0 | 0 | 0 | 0 | 0 |
| 2256<br>1 | [M]TELANGIECTATIC OSTEOSARCOMA                               | 0 | 0 | 0 | 0 | 0 | 0 | 0 | 0 | 0 | 0 | 0 | 0 | 2 | 0 | 0 | 0 | 0 | 0 |
| 2265<br>0 | [M]Angiosarcoma                                              | 0 | 0 | 0 | 0 | 0 | 0 | 0 | 0 | 0 | 0 | 0 | 0 | 2 | 0 | 0 | 0 | 0 | 0 |
| 2269<br>2 | [M]Acral lentiginous melanoma                                | 0 | 0 | 0 | 0 | 0 | 0 | 0 | 0 | 0 | 0 | 0 | 0 | 2 | 0 | 0 | 0 | 0 | 0 |
| 2289<br>3 | Malignant neoplasm of oropharynx                             | 0 | 0 | 0 | 0 | 0 | 0 | 0 | 0 | 0 | 0 | 0 | 0 | 2 | 0 | 0 | 0 | 0 | 0 |
| 2289<br>4 | MALIGNANT NEOPLASM OF CARDIO-OESOPHAGEAL JUNCTION OF STOMACH | 0 | 0 | 0 | 0 | 0 | 0 | 0 | 0 | 0 | 0 | 0 | 0 | 2 | 0 | 0 | 0 | 0 | 0 |
| 2308<br>1 | [M]CARCINOID BRONCHIAL ADENOMA                               | 0 | 0 | 0 | 0 | 0 | 0 | 0 | 0 | 0 | 0 | 0 | 0 | 2 | 0 | 0 | 0 | 0 | 0 |
| 2308<br>3 | [M]GLIOBLASTOMA NOS                                          | 0 | 0 | 0 | 0 | 0 | 0 | 0 | 0 | 0 | 0 | 0 | 0 | 2 | 0 | 0 | 0 | 0 | 0 |
| 2308<br>5 | [M]Epithelioid cell melanoma                                 | 0 | 0 | 0 | 0 | 0 | 0 | 0 | 0 | 0 | 0 | 0 | 0 | 2 | 0 | 0 | 0 | 0 | 0 |
| 2322<br>4 | TUMOUR STAGING                                               | 0 | 0 | 0 | 0 | 0 | 0 | 0 | 0 | 0 | 0 | 0 | 0 | 2 | 0 | 0 | 0 | 0 | 0 |
| 2338<br>0 | Malignant neoplasm of nipple of female breast                | 0 | 0 | 0 | 0 | 0 | 0 | 0 | 0 | 0 | 0 | 0 | 0 | 2 | 0 | 0 | 0 | 0 | 0 |
| 2338<br>9 | MALIGNANT NEOPLASM OF NASAL CAVITIES                         | 0 | 0 | 0 | 0 | 0 | 0 | 0 | 0 | 0 | 0 | 0 | 0 | 2 | 0 | 0 | 0 | 0 | 0 |
| 2339<br>9 | Malignant neoplasm of upper-outer quadrant of female breast  | 0 | 0 | 0 | 0 | 0 | 0 | 0 | 0 | 0 | 0 | 0 | 0 | 2 | 0 | 0 | 0 | 0 | 0 |
| 2343<br>3 | MALIGNANT NEOPLASM OF EXTRAHEPATIC BILE DUCTS                | 0 | 0 | 0 | 0 | 0 | 0 | 0 | 0 | 0 | 0 | 0 | 0 | 2 | 0 | 0 | 0 | 0 | 0 |
| 2348<br>0 | Malignant neoplasm of perianal skin                          | 0 | 0 | 0 | 0 | 0 | 0 | 0 | 0 | 0 | 0 | 0 | 0 | 2 | 0 | 0 | 0 | 0 | 0 |
| 2386<br>1 | MALIGNANT NEOPLASM OF CHEST WALL NOS                         | 0 | 0 | 0 | 0 | 0 | 0 | 0 | 0 | 0 | 0 | 0 | 0 | 2 | 0 | 0 | 0 | 0 | 0 |
| 2393<br>6 | [V]Personal history of malignant neoplasm of cervix uteri    | 0 | 0 | 0 | 0 | 0 | 0 | 0 | 0 | 0 | 0 | 0 | 0 | 2 | 0 | 0 | 0 | 0 | 0 |
| 2404<br>8 | MALIGNANT NEOPLASM OF RETROCAECAL TISSUE                     | 0 | 0 | 0 | 0 | 0 | 0 | 0 | 0 | 0 | 0 | 0 | 0 | 2 | 0 | 0 | 0 | 0 | 0 |
| 2420<br>8 | [M]SUPERFICIAL SPREADING MELANOMA                            | 0 | 0 | 0 | 0 | 0 | 0 | 0 | 0 | 0 | 0 | 0 | 0 | 2 | 0 | 0 | 0 | 0 | 0 |
| 2423<br>5 | Malig neopl peripheral nerves and autonomic nervous system   | 0 | 0 | 0 | 0 | 0 | 0 | 0 | 0 | 0 | 0 | 0 | 0 | 2 | 0 | 0 | 0 | 0 | 0 |
| 2437<br>0 | Malignant neoplasm of anal canal                             | 0 | 0 | 0 | 0 | 0 | 0 | 0 | 0 | 0 | 0 | 0 | 0 | 2 | 0 | 0 | 0 | 0 | 0 |
| 2437<br>4 | Carcinoma of lip, oral cavity and pharynx                    | 0 | 0 | 0 | 0 | 0 | 0 | 0 | 0 | 0 | 0 | 0 | 0 | 2 | 0 | 0 | 0 | 0 | 0 |

|      |   |                                                            |   |   |   |   |   |   |   |   |   |   |   |   |   |   |   |   |   |
|------|---|------------------------------------------------------------|---|---|---|---|---|---|---|---|---|---|---|---|---|---|---|---|---|
| 2437 | 5 | Dermatofibrosarcoma protuberans                            | 0 | 0 | 0 | 0 | 0 | 0 | 0 | 0 | 0 | 0 | 0 | 0 | 2 | 0 | 0 | 0 | 0 |
| 2439 | 7 | MALIGNANT NEOPLASM OF TONSILLAR FOSSA                      | 0 | 0 | 0 | 0 | 0 | 0 | 0 | 0 | 0 | 0 | 0 | 0 | 2 | 0 | 0 | 0 | 0 |
| 2445 | 6 | MALIG NEOP AUDITORY TUBE, MIDDLE EAR AND MASTOID AIR CELLS | 0 | 0 | 0 | 0 | 0 | 0 | 0 | 0 | 0 | 0 | 0 | 0 | 2 | 0 | 0 | 0 | 0 |
| 2451 | 1 | [M]MALIGNANT TUMOUR, GIANT CELL TYPE                       | 0 | 0 | 0 | 0 | 0 | 0 | 0 | 0 | 0 | 0 | 0 | 0 | 2 | 0 | 0 | 0 | 0 |
| 2452 | 3 | [M]PAGET'S DISEASE, EXTRAMAMMARY, EXC PAGET'S DISEASE BONE | 0 | 0 | 0 | 0 | 0 | 0 | 0 | 0 | 0 | 0 | 0 | 0 | 2 | 0 | 0 | 0 | 0 |
| 2453 | 9 | [M]CHONDROBLASTIC OSTEOSARCOMA                             | 0 | 0 | 0 | 0 | 0 | 0 | 0 | 0 | 0 | 0 | 0 | 0 | 2 | 0 | 0 | 0 | 0 |
| 2455 | 1 | [M]Melanocarcinoma                                         | 0 | 0 | 0 | 0 | 0 | 0 | 0 | 0 | 0 | 0 | 0 | 0 | 2 | 0 | 0 | 0 | 0 |
| 2467 | 5 | Malignant neoplasm of nasopharynx                          | 0 | 0 | 0 | 0 | 0 | 0 | 0 | 0 | 0 | 0 | 0 | 0 | 2 | 0 | 0 | 0 | 0 |
| 2485 | 2 | Malignant neoplasm of lingual tonsil                       | 0 | 0 | 0 | 0 | 0 | 0 | 0 | 0 | 0 | 0 | 0 | 0 | 2 | 0 | 0 | 0 | 0 |
| 2524 | 5 | MALIGNANT NEOPLASM OF SKIN OF FINGER                       | 0 | 0 | 0 | 0 | 0 | 0 | 0 | 0 | 0 | 0 | 0 | 0 | 2 | 0 | 0 | 0 | 0 |
| 2553 | 5 | Primary malignant neoplasm of liver                        | 0 | 0 | 0 | 0 | 0 | 0 | 0 | 0 | 0 | 0 | 0 | 0 | 2 | 0 | 0 | 0 | 0 |
| 2560 | 2 | MALIGNANT MELANOMA OF FINGER                               | 0 | 0 | 0 | 0 | 0 | 0 | 0 | 0 | 0 | 0 | 0 | 0 | 2 | 0 | 0 | 0 | 0 |
| 2564 | 1 | [M]LIVER CELL CARCINOMA                                    | 0 | 0 | 0 | 0 | 0 | 0 | 0 | 0 | 0 | 0 | 0 | 0 | 2 | 0 | 0 | 0 | 0 |
| 2588 | 6 | MALIGNANT NEOPLASM OF UPPER LOBE OF LUNG                   | 0 | 0 | 0 | 0 | 0 | 0 | 0 | 0 | 0 | 0 | 0 | 0 | 2 | 0 | 0 | 0 | 0 |
| 2596 | 1 | [M]LARGE CELL CARCINOMA NOS                                | 0 | 0 | 0 | 0 | 0 | 0 | 0 | 0 | 0 | 0 | 0 | 0 | 2 | 0 | 0 | 0 | 0 |
| 2603 | 4 | OTHER MALIGNANT NEOPLASM NOS                               | 0 | 0 | 0 | 0 | 0 | 0 | 0 | 0 | 0 | 0 | 0 | 0 | 2 | 0 | 0 | 0 | 0 |
| 2608 | 1 | GLEASON PROSTATE GRADE 8-10 (HIGH)                         | 0 | 0 | 0 | 0 | 0 | 0 | 0 | 0 | 0 | 0 | 0 | 0 | 2 | 0 | 0 | 0 | 0 |
| 2613 | 4 | Malignant neoplasm of epiglottis                           | 0 | 0 | 0 | 0 | 0 | 0 | 0 | 0 | 0 | 0 | 0 | 0 | 2 | 0 | 0 | 0 | 0 |
| 2616 | 5 | Malignant neoplasm of supraglottis                         | 0 | 0 | 0 | 0 | 0 | 0 | 0 | 0 | 0 | 0 | 0 | 0 | 2 | 0 | 0 | 0 | 0 |
| 2619 | 7 | ADMINISTRATION OF CANCER TREATMENT                         | 0 | 0 | 0 | 0 | 0 | 0 | 0 | 0 | 0 | 0 | 0 | 0 | 2 | 0 | 0 | 0 | 0 |
| 2625 | 3 | [M]Neuroendocrine carcinoma                                | 0 | 0 | 0 | 0 | 0 | 0 | 0 | 0 | 0 | 0 | 0 | 0 | 2 | 0 | 0 | 0 | 0 |
| 2639 | 3 | MALIGNANT NEOPLASM OF LIVER UNSPECIFIED                    | 0 | 0 | 0 | 0 | 0 | 0 | 0 | 0 | 0 | 0 | 0 | 0 | 2 | 0 | 0 | 0 | 0 |
| 2641 | 3 | [M]Pleomorphic carcinoma                                   | 0 | 0 | 0 | 0 | 0 | 0 | 0 | 0 | 0 | 0 | 0 | 0 | 2 | 0 | 0 | 0 | 0 |
| 2644 | 8 | Malignant neoplasm of faucial tonsil                       | 0 | 0 | 0 | 0 | 0 | 0 | 0 | 0 | 0 | 0 | 0 | 0 | 2 | 0 | 0 | 0 | 0 |

|           |                                                             |   |   |   |   |   |   |   |   |   |   |   |   |   |   |   |   |   |   |   |
|-----------|-------------------------------------------------------------|---|---|---|---|---|---|---|---|---|---|---|---|---|---|---|---|---|---|---|
| 2645<br>4 | Malignant neoplasm/overlapping lesion/feml genital organs   | 0 | 0 | 0 | 0 | 0 | 0 | 0 | 0 | 0 | 0 | 0 | 0 | 0 | 2 | 0 | 0 | 0 | 0 | 0 |
| 2665<br>2 | MALIG NEOP NASAL CAVITIES, MIDDLE EAR AND ACCESSORY SINUSES | 0 | 0 | 0 | 0 | 0 | 0 | 0 | 0 | 0 | 0 | 0 | 0 | 0 | 2 | 0 | 0 | 0 | 0 | 0 |
| 2681<br>3 | Malignant neoplasm of larynx, other specified site          | 0 | 0 | 0 | 0 | 0 | 0 | 0 | 0 | 0 | 0 | 0 | 0 | 0 | 2 | 0 | 0 | 0 | 0 | 0 |
| 2681<br>4 | [M]HEPATOMA, MALIGNANT                                      | 0 | 0 | 0 | 0 | 0 | 0 | 0 | 0 | 0 | 0 | 0 | 0 | 0 | 2 | 0 | 0 | 0 | 0 | 0 |
| 2685<br>3 | Malignant neoplasm of nipple and areola of female breast    | 0 | 0 | 0 | 0 | 0 | 0 | 0 | 0 | 0 | 0 | 0 | 0 | 0 | 2 | 0 | 0 | 0 | 0 | 0 |
| 2688<br>1 | [M]DERMATOFIBROMA PROTUBERANS                               | 0 | 0 | 0 | 0 | 0 | 0 | 0 | 0 | 0 | 0 | 0 | 0 | 0 | 2 | 0 | 0 | 0 | 0 | 0 |
| 2736<br>3 | [M]Meningioma, malignant                                    | 0 | 0 | 0 | 0 | 0 | 0 | 0 | 0 | 0 | 0 | 0 | 0 | 0 | 2 | 0 | 0 | 0 | 0 | 0 |
| 2737<br>0 | MALIGNANT NEOPLASM SKIN OF OTHER AND UNSPECIFIED PARTS FACE | 0 | 0 | 0 | 0 | 0 | 0 | 0 | 0 | 0 | 0 | 0 | 0 | 0 | 2 | 0 | 0 | 0 | 0 | 0 |
| 2743<br>9 | [M]Kaposi's sarcoma                                         | 0 | 0 | 0 | 0 | 0 | 0 | 0 | 0 | 0 | 0 | 0 | 0 | 0 | 2 | 0 | 0 | 0 | 0 | 0 |
| 2744<br>0 | [M]Linitis plastica                                         | 0 | 0 | 0 | 0 | 0 | 0 | 0 | 0 | 0 | 0 | 0 | 0 | 0 | 2 | 0 | 0 | 0 | 0 | 0 |
| 2744<br>9 | Malignant neoplasm of upper limb NOS                        | 0 | 0 | 0 | 0 | 0 | 0 | 0 | 0 | 0 | 0 | 0 | 0 | 0 | 2 | 0 | 0 | 0 | 0 | 0 |
| 2748<br>3 | MALIGNANT NEOPLASM OF THYMUS                                | 0 | 0 | 0 | 0 | 0 | 0 | 0 | 0 | 0 | 0 | 0 | 0 | 0 | 2 | 0 | 0 | 0 | 0 | 0 |
| 2750<br>9 | [M]MESOTHELIOMA, MALIGNANT                                  | 0 | 0 | 0 | 0 | 0 | 0 | 0 | 0 | 0 | 0 | 0 | 0 | 0 | 2 | 0 | 0 | 0 | 0 | 0 |
| 2752<br>8 | Malignant neoplasm of ribs, sternum and clavicle            | 0 | 0 | 0 | 0 | 0 | 0 | 0 | 0 | 0 | 0 | 0 | 0 | 0 | 2 | 0 | 0 | 0 | 0 | 0 |
| 2754<br>0 | MALIGNANT NEOPLASM OF RENAL CALYCES                         | 0 | 0 | 0 | 0 | 0 | 0 | 0 | 0 | 0 | 0 | 0 | 0 | 0 | 2 | 0 | 0 | 0 | 0 | 0 |
| 2761<br>7 | MALIGNANT NEOPLASM OF OVERLAPPING LESION OF VULVA           | 0 | 0 | 0 | 0 | 0 | 0 | 0 | 0 | 0 | 0 | 0 | 0 | 0 | 2 | 0 | 0 | 0 | 0 | 0 |
| 2765<br>3 | [M]GLIOMA NOS                                               | 0 | 0 | 0 | 0 | 0 | 0 | 0 | 0 | 0 | 0 | 0 | 0 | 0 | 2 | 0 | 0 | 0 | 0 | 0 |
| 2771<br>5 | Malignant neoplasm of anterior mediastinum                  | 0 | 0 | 0 | 0 | 0 | 0 | 0 | 0 | 0 | 0 | 0 | 0 | 0 | 2 | 0 | 0 | 0 | 0 | 0 |
| 2774<br>4 | [M]OLIGODENDROGLIOMA NOS                                    | 0 | 0 | 0 | 0 | 0 | 0 | 0 | 0 | 0 | 0 | 0 | 0 | 0 | 2 | 0 | 0 | 0 | 0 | 0 |
| 2774<br>8 | [M]ASTROCYTIC GLIOMA                                        | 0 | 0 | 0 | 0 | 0 | 0 | 0 | 0 | 0 | 0 | 0 | 0 | 0 | 2 | 0 | 0 | 0 | 0 | 0 |
| 2784<br>6 | [M]FIBRILLARY ASTROCYTOMA                                   | 0 | 0 | 0 | 0 | 0 | 0 | 0 | 0 | 0 | 0 | 0 | 0 | 0 | 2 | 0 | 0 | 0 | 0 | 0 |
| 2784<br>9 | [M]Villous adenocarcinoma                                   | 0 | 0 | 0 | 0 | 0 | 0 | 0 | 0 | 0 | 0 | 0 | 0 | 0 | 2 | 0 | 0 | 0 | 0 | 0 |
| 2785<br>5 | Malignant neoplasm of rectosigmoid junction                 | 0 | 0 | 0 | 0 | 0 | 0 | 0 | 0 | 0 | 0 | 0 | 0 | 0 | 2 | 0 | 0 | 0 | 0 | 0 |
| 2789<br>7 | Malignant neoplasm of anus unspecified                      | 0 | 0 | 0 | 0 | 0 | 0 | 0 | 0 | 0 | 0 | 0 | 0 | 0 | 2 | 0 | 0 | 0 | 0 | 0 |

|      |   |                                                            |   |   |   |   |   |   |   |   |   |   |   |   |   |   |   |   |   |   |
|------|---|------------------------------------------------------------|---|---|---|---|---|---|---|---|---|---|---|---|---|---|---|---|---|---|
| 2793 | 1 | Kaposi's sarcoma of skin                                   | 0 | 0 | 0 | 0 | 0 | 0 | 0 | 0 | 0 | 0 | 0 | 0 | 2 | 0 | 0 | 0 | 0 | 0 |
| 2797 | 1 | [M]GERMINOMA                                               | 0 | 0 | 0 | 0 | 0 | 0 | 0 | 0 | 0 | 0 | 0 | 0 | 2 | 0 | 0 | 0 | 0 | 0 |
| 2800 | 3 | CHORIOCARCINOMA                                            | 0 | 0 | 0 | 0 | 0 | 0 | 0 | 0 | 0 | 0 | 0 | 0 | 2 | 0 | 0 | 0 | 0 | 0 |
| 2806 | 9 | MALIGNANT NEOPLASM OF RETINA                               | 0 | 0 | 0 | 0 | 0 | 0 | 0 | 0 | 0 | 0 | 0 | 0 | 2 | 0 | 0 | 0 | 0 | 0 |
| 2814 | 8 | MALIGNANT NEOPLASM OF ADRENAL GLAND                        | 0 | 0 | 0 | 0 | 0 | 0 | 0 | 0 | 0 | 0 | 0 | 0 | 2 | 0 | 0 | 0 | 0 | 0 |
| 2816 | 3 | MALIGNANT NEOPLASM OF COLON NOS                            | 0 | 0 | 0 | 0 | 0 | 0 | 0 | 0 | 0 | 0 | 0 | 0 | 2 | 0 | 0 | 0 | 0 | 0 |
| 2824 | 1 | MALIGNANT NEOPLASM OF URETERIC ORIFICE                     | 0 | 0 | 0 | 0 | 0 | 0 | 0 | 0 | 0 | 0 | 0 | 0 | 2 | 0 | 0 | 0 | 0 | 0 |
| 2827 | 2 | [M]ADENOCARCINOMA, INTESTINAL TYPE                         | 0 | 0 | 0 | 0 | 0 | 0 | 0 | 0 | 0 | 0 | 0 | 0 | 2 | 0 | 0 | 0 | 0 | 0 |
| 2831 | 1 | Malignant neoplasm of cervix uteri NOS                     | 0 | 0 | 0 | 0 | 0 | 0 | 0 | 0 | 0 | 0 | 0 | 0 | 2 | 0 | 0 | 0 | 0 | 0 |
| 2839 | 6 | [M]MUCINOUS CYSTADENOMA, BORDERLINE MALIGNANCY             | 0 | 0 | 0 | 0 | 0 | 0 | 0 | 0 | 0 | 0 | 0 | 0 | 2 | 0 | 0 | 0 | 0 | 0 |
| 2845 | 1 | Malignant neoplasm of hypopharynx NOS                      | 0 | 0 | 0 | 0 | 0 | 0 | 0 | 0 | 0 | 0 | 0 | 0 | 2 | 0 | 0 | 0 | 0 | 0 |
| 2855 | 6 | Malignant melanoma of skin NOS                             | 0 | 0 | 0 | 0 | 0 | 0 | 0 | 0 | 0 | 0 | 0 | 0 | 2 | 0 | 0 | 0 | 0 | 0 |
| 2855 | 9 | MALIGNANT NEOPLASM OF PALATE NOS                           | 0 | 0 | 0 | 0 | 0 | 0 | 0 | 0 | 0 | 0 | 0 | 0 | 2 | 0 | 0 | 0 | 0 | 0 |
| 2859 | 9 | [M]Liposarcoma NOS                                         | 0 | 0 | 0 | 0 | 0 | 0 | 0 | 0 | 0 | 0 | 0 | 0 | 2 | 0 | 0 | 0 | 0 | 0 |
| 2862 | 5 | [M]Mucoepidermoid carcinoma                                | 0 | 0 | 0 | 0 | 0 | 0 | 0 | 0 | 0 | 0 | 0 | 0 | 2 | 0 | 0 | 0 | 0 | 0 |
| 2862 | 8 | [M]LIPOSARCOMA, WELL DIFFERENTIATED TYPE                   | 0 | 0 | 0 | 0 | 0 | 0 | 0 | 0 | 0 | 0 | 0 | 0 | 2 | 0 | 0 | 0 | 0 | 0 |
| 2866 | 5 | MALIGNANT NEOPLASM OF NASOPHARYNX NOS                      | 0 | 0 | 0 | 0 | 0 | 0 | 0 | 0 | 0 | 0 | 0 | 0 | 2 | 0 | 0 | 0 | 0 | 0 |
| 2883 | 6 | [M]Retinoblastomas                                         | 0 | 0 | 0 | 0 | 0 | 0 | 0 | 0 | 0 | 0 | 0 | 0 | 2 | 0 | 0 | 0 | 0 | 0 |
| 2888 | 1 | [V]Personal history of malignant neoplasm of kidney        | 0 | 0 | 0 | 0 | 0 | 0 | 0 | 0 | 0 | 0 | 0 | 0 | 2 | 0 | 0 | 0 | 0 | 0 |
| 2891 | 9 | MALIGNANT NEOPLASM OF CEREBRAL MENINGES                    | 0 | 0 | 0 | 0 | 0 | 0 | 0 | 0 | 0 | 0 | 0 | 0 | 2 | 0 | 0 | 0 | 0 | 0 |
| 2894 | 1 | [M]Embryonal carcinoma NOS                                 | 0 | 0 | 0 | 0 | 0 | 0 | 0 | 0 | 0 | 0 | 0 | 0 | 2 | 0 | 0 | 0 | 0 | 0 |
| 2900 | 8 | [M]HURTHLE CELL ADENOCARCINOMA                             | 0 | 0 | 0 | 0 | 0 | 0 | 0 | 0 | 0 | 0 | 0 | 0 | 2 | 0 | 0 | 0 | 0 | 0 |
| 2916 | 0 | Malignant neoplasm of connective and soft tissue of axilla | 0 | 0 | 0 | 0 | 0 | 0 | 0 | 0 | 0 | 0 | 0 | 0 | 2 | 0 | 0 | 0 | 0 | 0 |
| 2928 | 3 | Malignant neoplasm of other site of respiratory tract      | 0 | 0 | 0 | 0 | 0 | 0 | 0 | 0 | 0 | 0 | 0 | 0 | 2 | 0 | 0 | 0 | 0 | 0 |



|           |                                                             |   |   |   |   |   |   |   |   |   |   |   |   |   |   |   |   |   |   |   |
|-----------|-------------------------------------------------------------|---|---|---|---|---|---|---|---|---|---|---|---|---|---|---|---|---|---|---|
| 2928<br>4 | [V]Personal history of malignant neoplasm of lung           | 0 | 0 | 0 | 0 | 0 | 0 | 0 | 0 | 0 | 0 | 0 | 0 | 0 | 2 | 0 | 0 | 0 | 0 | 0 |
| 2933<br>7 | [M] Small cell osteosarcoma                                 | 0 | 0 | 0 | 0 | 0 | 0 | 0 | 0 | 0 | 0 | 0 | 0 | 0 | 2 | 0 | 0 | 0 | 0 | 0 |
| 2946<br>2 | Malignant neoplasm of kidney or urinary organs NOS          | 0 | 0 | 0 | 0 | 0 | 0 | 0 | 0 | 0 | 0 | 0 | 0 | 0 | 2 | 0 | 0 | 0 | 0 | 0 |
| 2952<br>4 | [M]Basal cell carcinoma, fibroepithelial type               | 0 | 0 | 0 | 0 | 0 | 0 | 0 | 0 | 0 | 0 | 0 | 0 | 0 | 2 | 0 | 0 | 0 | 0 | 0 |
| 2958<br>0 | [M]SERTOLI CELL CARCINOMA                                   | 0 | 0 | 0 | 0 | 0 | 0 | 0 | 0 | 0 | 0 | 0 | 0 | 0 | 2 | 0 | 0 | 0 | 0 | 0 |
| 2978<br>7 | [M]Squamous cell carcinoma, keratinising type NOS           | 0 | 0 | 0 | 0 | 0 | 0 | 0 | 0 | 0 | 0 | 0 | 0 | 0 | 2 | 0 | 0 | 0 | 0 | 0 |
| 2982<br>6 | MALIGNANT NEOPLASM OF UPPER-INNER QUADRANT OF FEMALE BREAST | 0 | 0 | 0 | 0 | 0 | 0 | 0 | 0 | 0 | 0 | 0 | 0 | 0 | 2 | 0 | 0 | 0 | 0 | 0 |
| 2994<br>5 | [M]Malignant teratoma                                       | 0 | 0 | 0 | 0 | 0 | 0 | 0 | 0 | 0 | 0 | 0 | 0 | 0 | 2 | 0 | 0 | 0 | 0 | 0 |
| 3016<br>5 | MALIGNANT NEOPLASM OF MESORECTUM                            | 0 | 0 | 0 | 0 | 0 | 0 | 0 | 0 | 0 | 0 | 0 | 0 | 0 | 2 | 0 | 0 | 0 | 0 | 0 |
| 3018<br>9 | [M]Intraductal papillary adenocarcinoma with invasion       | 0 | 0 | 0 | 0 | 0 | 0 | 0 | 0 | 0 | 0 | 0 | 0 | 0 | 2 | 0 | 0 | 0 | 0 | 0 |
| 3027<br>3 | [M]PILOCYTIC ASTROCYTOMA                                    | 0 | 0 | 0 | 0 | 0 | 0 | 0 | 0 | 0 | 0 | 0 | 0 | 0 | 2 | 0 | 0 | 0 | 0 | 0 |
| 3032<br>2 | [V]Personal history of malignant neoplasm of urinary organ  | 0 | 0 | 0 | 0 | 0 | 0 | 0 | 0 | 0 | 0 | 0 | 0 | 0 | 2 | 0 | 0 | 0 | 0 | 0 |
| 3040<br>2 | Malignant neoplasm of buccal mucosa                         | 0 | 0 | 0 | 0 | 0 | 0 | 0 | 0 | 0 | 0 | 0 | 0 | 0 | 2 | 0 | 0 | 0 | 0 | 0 |
| 3041<br>6 | [M]COLLOID ADENOCARCINOMA                                   | 0 | 0 | 0 | 0 | 0 | 0 | 0 | 0 | 0 | 0 | 0 | 0 | 0 | 2 | 0 | 0 | 0 | 0 | 0 |
| 3051<br>1 | MALIG NEOP OF OTHER ENDOCRINE GLANDS AND RELATED STRUCTURES | 0 | 0 | 0 | 0 | 0 | 0 | 0 | 0 | 0 | 0 | 0 | 0 | 0 | 2 | 0 | 0 | 0 | 0 | 0 |
| 3052<br>6 | [X]Mesothelioma                                             | 0 | 0 | 0 | 0 | 0 | 0 | 0 | 0 | 0 | 0 | 0 | 0 | 0 | 2 | 0 | 0 | 0 | 0 | 0 |
| 3053<br>7 | Polyneuropathy in malignant disease                         | 0 | 0 | 0 | 0 | 0 | 0 | 0 | 0 | 0 | 0 | 0 | 0 | 0 | 2 | 0 | 0 | 0 | 0 | 0 |
| 3054<br>2 | MALIG NEOP OF CONNECTIVE AND SOFT TISSUE OF LOWER LEG       | 0 | 0 | 0 | 0 | 0 | 0 | 0 | 0 | 0 | 0 | 0 | 0 | 0 | 2 | 0 | 0 | 0 | 0 | 0 |
| 3054<br>3 | Malignant neoplasm of skin of breast                        | 0 | 0 | 0 | 0 | 0 | 0 | 0 | 0 | 0 | 0 | 0 | 0 | 0 | 2 | 0 | 0 | 0 | 0 | 0 |
| 3054<br>7 | [V]FOLLOW-UP EXAM AFTER RADIOTHERAPY FOR MALIGNANT NEOPLASM | 0 | 0 | 0 | 0 | 0 | 0 | 0 | 0 | 0 | 0 | 0 | 0 | 0 | 2 | 0 | 0 | 0 | 0 | 0 |
| 3057<br>6 | Malignant neoplasm of skin of forehead                      | 0 | 0 | 0 | 0 | 0 | 0 | 0 | 0 | 0 | 0 | 0 | 0 | 0 | 2 | 0 | 0 | 0 | 0 | 0 |
| 3057<br>7 | MALIGNANT NEOPLASM OF SKIN OF FORE-ARM                      | 0 | 0 | 0 | 0 | 0 | 0 | 0 | 0 | 0 | 0 | 0 | 0 | 0 | 2 | 0 | 0 | 0 | 0 | 0 |
| 3064<br>5 | Malignant neoplasm of skin of cheek                         | 0 | 0 | 0 | 0 | 0 | 0 | 0 | 0 | 0 | 0 | 0 | 0 | 0 | 2 | 0 | 0 | 0 | 0 | 0 |
| 3070<br>0 | Malignant neoplasm of oesophagus NOS                        | 0 | 0 | 0 | 0 | 0 | 0 | 0 | 0 | 0 | 0 | 0 | 0 | 0 | 2 | 0 | 0 | 0 | 0 | 0 |

|           |                                                             |   |   |   |   |   |   |   |   |   |   |   |   |   |   |   |   |   |   |
|-----------|-------------------------------------------------------------|---|---|---|---|---|---|---|---|---|---|---|---|---|---|---|---|---|---|
| 3074<br>7 | MALIGNANT NEOPLASM OF SKIN OF UPPER LIMB AND SHOULDER       | 0 | 0 | 0 | 0 | 0 | 0 | 0 | 0 | 0 | 0 | 0 | 0 | 0 | 2 | 0 | 0 | 0 | 0 |
| 3098<br>8 | [M]Small cell carcinoma                                     | 0 | 0 | 0 | 0 | 0 | 0 | 0 | 0 | 0 | 0 | 0 | 0 | 0 | 2 | 0 | 0 | 0 | 0 |
| 3100<br>4 | [M]Adenoid squamous cell carcinoma                          | 0 | 0 | 0 | 0 | 0 | 0 | 0 | 0 | 0 | 0 | 0 | 0 | 0 | 2 | 0 | 0 | 0 | 0 |
| 3102<br>6 | [M]SPINDLE CELL SARCOMA                                     | 0 | 0 | 0 | 0 | 0 | 0 | 0 | 0 | 0 | 0 | 0 | 0 | 0 | 2 | 0 | 0 | 0 | 0 |
| 3109<br>0 | [M]Pigmented dermatofibrosarcoma protuberans                | 0 | 0 | 0 | 0 | 0 | 0 | 0 | 0 | 0 | 0 | 0 | 0 | 0 | 2 | 0 | 0 | 0 | 0 |
| 3110<br>2 | Malignant neoplasm of urinary bladder NOS                   | 0 | 0 | 0 | 0 | 0 | 0 | 0 | 0 | 0 | 0 | 0 | 0 | 0 | 2 | 0 | 0 | 0 | 0 |
| 3118<br>8 | Malignant neoplasm of lower lobe, bronchus or lung          | 0 | 0 | 0 | 0 | 0 | 0 | 0 | 0 | 0 | 0 | 0 | 0 | 0 | 2 | 0 | 0 | 0 | 0 |
| 3121<br>0 | Hepatoblastoma of liver                                     | 0 | 0 | 0 | 0 | 0 | 0 | 0 | 0 | 0 | 0 | 0 | 0 | 0 | 2 | 0 | 0 | 0 | 0 |
| 3126<br>8 | Malignant neoplasm of middle lobe                           | 0 | 0 | 0 | 0 | 0 | 0 | 0 | 0 | 0 | 0 | 0 | 0 | 0 | 2 | 0 | 0 | 0 | 0 |
| 3132<br>3 | [M]Fibrosarcoma NOS                                         | 0 | 0 | 0 | 0 | 0 | 0 | 0 | 0 | 0 | 0 | 0 | 0 | 0 | 2 | 0 | 0 | 0 | 0 |
| 3136<br>4 | Malignant neoplasm of cheek mucosa                          | 0 | 0 | 0 | 0 | 0 | 0 | 0 | 0 | 0 | 0 | 0 | 0 | 0 | 2 | 0 | 0 | 0 | 0 |
| 3139<br>3 | CARCINOMA GALLBLADDER                                       | 0 | 0 | 0 | 0 | 0 | 0 | 0 | 0 | 0 | 0 | 0 | 0 | 0 | 2 | 0 | 0 | 0 | 0 |
| 3139<br>9 | MALIGNANT NEOPLASM OF LOWER LIMB NOS                        | 0 | 0 | 0 | 0 | 0 | 0 | 0 | 0 | 0 | 0 | 0 | 0 | 0 | 2 | 0 | 0 | 0 | 0 |
| 3142<br>1 | [M]Rhabdomyosarcoma NOS                                     | 0 | 0 | 0 | 0 | 0 | 0 | 0 | 0 | 0 | 0 | 0 | 0 | 0 | 2 | 0 | 0 | 0 | 0 |
| 3154<br>6 | Malignant neoplasm of central part of female breast         | 0 | 0 | 0 | 0 | 0 | 0 | 0 | 0 | 0 | 0 | 0 | 0 | 0 | 2 | 0 | 0 | 0 | 0 |
| 3156<br>1 | [V]FOLLOW-UP EXAMINATION AFT SURGERY FOR MALIGNANT NEOPLASM | 0 | 0 | 0 | 0 | 0 | 0 | 0 | 0 | 0 | 0 | 0 | 0 | 0 | 2 | 0 | 0 | 0 | 0 |
| 3157<br>3 | Malignant neoplasm of pleura                                | 0 | 0 | 0 | 0 | 0 | 0 | 0 | 0 | 0 | 0 | 0 | 0 | 0 | 2 | 0 | 0 | 0 | 0 |
| 3157<br>4 | [M]GLIOMA, MALIGNANT                                        | 0 | 0 | 0 | 0 | 0 | 0 | 0 | 0 | 0 | 0 | 0 | 0 | 0 | 2 | 0 | 0 | 0 | 0 |
| 3160<br>8 | Malignant neoplasm of other site of uterine body            | 0 | 0 | 0 | 0 | 0 | 0 | 0 | 0 | 0 | 0 | 0 | 0 | 0 | 2 | 0 | 0 | 0 | 0 |
| 3160<br>9 | [M]Granulosa cell tumour, malignant                         | 0 | 0 | 0 | 0 | 0 | 0 | 0 | 0 | 0 | 0 | 0 | 0 | 0 | 2 | 0 | 0 | 0 | 0 |
| 3167<br>3 | [M]OSTEOCLASTOMA, MALIGNANT                                 | 0 | 0 | 0 | 0 | 0 | 0 | 0 | 0 | 0 | 0 | 0 | 0 | 0 | 2 | 0 | 0 | 0 | 0 |
| 3170<br>0 | Malignant neoplasm of upper lobe bronchus                   | 0 | 0 | 0 | 0 | 0 | 0 | 0 | 0 | 0 | 0 | 0 | 0 | 0 | 2 | 0 | 0 | 0 | 0 |
| 3176<br>7 | [M]MEDULLOMYOBlastoma                                       | 0 | 0 | 0 | 0 | 0 | 0 | 0 | 0 | 0 | 0 | 0 | 0 | 0 | 2 | 0 | 0 | 0 | 0 |
| 3177<br>2 | [M]Dermatofibrosarcoma NOS                                  | 0 | 0 | 0 | 0 | 0 | 0 | 0 | 0 | 0 | 0 | 0 | 0 | 0 | 2 | 0 | 0 | 0 | 0 |

|      |   |                                                       |   |   |   |   |   |   |   |   |   |   |   |   |   |   |   |   |   |   |
|------|---|-------------------------------------------------------|---|---|---|---|---|---|---|---|---|---|---|---|---|---|---|---|---|---|
| 3202 | 2 | Malignant neoplasm of cardia of stomach               | 0 | 0 | 0 | 0 | 0 | 0 | 0 | 0 | 0 | 0 | 0 | 0 | 2 | 0 | 0 | 0 | 0 | 0 |
| 3202 | 4 | Malignant neoplasm of upper gum                       | 0 | 0 | 0 | 0 | 0 | 0 | 0 | 0 | 0 | 0 | 0 | 0 | 2 | 0 | 0 | 0 | 0 | 0 |
| 3217 | 4 | MALIGNANT NEOPLASM OF MAXILLARY SINUS                 | 0 | 0 | 0 | 0 | 0 | 0 | 0 | 0 | 0 | 0 | 0 | 0 | 2 | 0 | 0 | 0 | 0 | 0 |
| 3219 | 1 | [M]DYSGERMINOMA                                       | 0 | 0 | 0 | 0 | 0 | 0 | 0 | 0 | 0 | 0 | 0 | 0 | 2 | 0 | 0 | 0 | 0 | 0 |
| 3221 | 3 | [M]Malignant tumour, fusiform cell type               | 0 | 0 | 0 | 0 | 0 | 0 | 0 | 0 | 0 | 0 | 0 | 0 | 2 | 0 | 0 | 0 | 0 | 0 |
| 3224 | 6 | [V]Personal history of malignant neoplasm of bronchus | 0 | 0 | 0 | 0 | 0 | 0 | 0 | 0 | 0 | 0 | 0 | 0 | 2 | 0 | 0 | 0 | 0 | 0 |
| 3229 | 4 | [M]GLUCAGONOMA, MALIGNANT                             | 0 | 0 | 0 | 0 | 0 | 0 | 0 | 0 | 0 | 0 | 0 | 0 | 2 | 0 | 0 | 0 | 0 | 0 |
| 3235 | 1 | Squamous cell carcinoma antigen level                 | 0 | 0 | 0 | 0 | 0 | 0 | 0 | 0 | 0 | 0 | 0 | 0 | 2 | 0 | 0 | 0 | 0 | 0 |
| 3236 | 2 | MALIGNANT NEOPLASM OF FUNDUS OF STOMACH               | 0 | 0 | 0 | 0 | 0 | 0 | 0 | 0 | 0 | 0 | 0 | 0 | 2 | 0 | 0 | 0 | 0 | 0 |
| 3237 | 2 | Malignant neoplasm of thoracic vertebra               | 0 | 0 | 0 | 0 | 0 | 0 | 0 | 0 | 0 | 0 | 0 | 0 | 2 | 0 | 0 | 0 | 0 | 0 |
| 3241 | 1 | Cancer treatment started                              | 0 | 0 | 0 | 0 | 0 | 0 | 0 | 0 | 0 | 0 | 0 | 0 | 2 | 0 | 0 | 0 | 0 | 0 |
| 3247 | 2 | [M]INFLAMMATORY CARCINOMA                             | 0 | 0 | 0 | 0 | 0 | 0 | 0 | 0 | 0 | 0 | 0 | 0 | 2 | 0 | 0 | 0 | 0 | 0 |
| 3264 | 1 | [M]Merkel cell carcinoma                              | 0 | 0 | 0 | 0 | 0 | 0 | 0 | 0 | 0 | 0 | 0 | 0 | 2 | 0 | 0 | 0 | 0 | 0 |
| 3276 | 8 | MALIGNANT MELANOMA OF BREAST                          | 0 | 0 | 0 | 0 | 0 | 0 | 0 | 0 | 0 | 0 | 0 | 0 | 2 | 0 | 0 | 0 | 0 | 0 |
| 3295 | 5 | Malignant neoplasm of other site of cervix            | 0 | 0 | 0 | 0 | 0 | 0 | 0 | 0 | 0 | 0 | 0 | 0 | 2 | 0 | 0 | 0 | 0 | 0 |
| 3327 | 1 | Malignant neoplasm of pinna NEC                       | 0 | 0 | 0 | 0 | 0 | 0 | 0 | 0 | 0 | 0 | 0 | 0 | 2 | 0 | 0 | 0 | 0 | 0 |
| 3338 | 8 | Malignant neoplasm of adenoid                         | 0 | 0 | 0 | 0 | 0 | 0 | 0 | 0 | 0 | 0 | 0 | 0 | 2 | 0 | 0 | 0 | 0 | 0 |
| 3344 | 4 | MALIGNANT NEOPLASM OF HILUS OF LUNG                   | 0 | 0 | 0 | 0 | 0 | 0 | 0 | 0 | 0 | 0 | 0 | 0 | 2 | 0 | 0 | 0 | 0 | 0 |
| 3349 | 7 | [M]Squamous cell carcinoma, microinvasive             | 0 | 0 | 0 | 0 | 0 | 0 | 0 | 0 | 0 | 0 | 0 | 0 | 2 | 0 | 0 | 0 | 0 | 0 |
| 3361 | 7 | MALIGNANT NEOPLASM OF BODY OF UTERUS NOS              | 0 | 0 | 0 | 0 | 0 | 0 | 0 | 0 | 0 | 0 | 0 | 0 | 2 | 0 | 0 | 0 | 0 | 0 |
| 3363 | 6 | [M]Teratoma, malignant, NOS                           | 0 | 0 | 0 | 0 | 0 | 0 | 0 | 0 | 0 | 0 | 0 | 0 | 2 | 0 | 0 | 0 | 0 | 0 |
| 3368 | 2 | Malignant neoplasm of skin of lower leg               | 0 | 0 | 0 | 0 | 0 | 0 | 0 | 0 | 0 | 0 | 0 | 0 | 2 | 0 | 0 | 0 | 0 | 0 |
| 3377 | 5 | [M]Adenoid cystic carcinoma                           | 0 | 0 | 0 | 0 | 0 | 0 | 0 | 0 | 0 | 0 | 0 | 0 | 2 | 0 | 0 | 0 | 0 | 0 |
| 3383 | 3 | MALIGNANT NEOPLASM OF MANDIBLE                        | 0 | 0 | 0 | 0 | 0 | 0 | 0 | 0 | 0 | 0 | 0 | 0 | 2 | 0 | 0 | 0 | 0 | 0 |

|      |   |                                                          |   |   |   |   |   |   |   |   |   |   |   |   |   |   |   |   |   |
|------|---|----------------------------------------------------------|---|---|---|---|---|---|---|---|---|---|---|---|---|---|---|---|---|
| 3387 | 1 | Malignant neoplasm of ileum                              | 0 | 0 | 0 | 0 | 0 | 0 | 0 | 0 | 0 | 0 | 0 | 0 | 2 | 0 | 0 | 0 | 0 |
| 3399 | 7 | MALIGNANT NEOPLASM OF SKIN OF AURICLE (EAR)              | 0 | 0 | 0 | 0 | 0 | 0 | 0 | 0 | 0 | 0 | 0 | 0 | 2 | 0 | 0 | 0 | 0 |
| 3400 | 0 | [M]CYSTADENOCARCINOMA NOS                                | 0 | 0 | 0 | 0 | 0 | 0 | 0 | 0 | 0 | 0 | 0 | 0 | 2 | 0 | 0 | 0 | 0 |
| 3401 | 2 | Malignant neoplasm of hypopharynx                        | 0 | 0 | 0 | 0 | 0 | 0 | 0 | 0 | 0 | 0 | 0 | 0 | 2 | 0 | 0 | 0 | 0 |
| 3401 | 5 | [M]Bronchiolo-alveolar adenocarcinoma                    | 0 | 0 | 0 | 0 | 0 | 0 | 0 | 0 | 0 | 0 | 0 | 0 | 2 | 0 | 0 | 0 | 0 |
| 3403 | 0 | [M]ENDOMETRIAL STROMAL SARCOMA                           | 0 | 0 | 0 | 0 | 0 | 0 | 0 | 0 | 0 | 0 | 0 | 0 | 2 | 0 | 0 | 0 | 0 |
| 3407 | 5 | MALIG NEOP OF RESPIRATORY TRACT AND INTRATHORACIC ORGANS | 0 | 0 | 0 | 0 | 0 | 0 | 0 | 0 | 0 | 0 | 0 | 0 | 2 | 0 | 0 | 0 | 0 |
| 3409 | 6 | [M]GRANULAR CELL CARCINOMA                               | 0 | 0 | 0 | 0 | 0 | 0 | 0 | 0 | 0 | 0 | 0 | 0 | 2 | 0 | 0 | 0 | 0 |
| 3411 | 0 | [M]CARCINOID TUMOUR, MALIGNANT                           | 0 | 0 | 0 | 0 | 0 | 0 | 0 | 0 | 0 | 0 | 0 | 0 | 2 | 0 | 0 | 0 | 0 |
| 3425 | 2 | [M]GLIOSARCOMA                                           | 0 | 0 | 0 | 0 | 0 | 0 | 0 | 0 | 0 | 0 | 0 | 0 | 2 | 0 | 0 | 0 | 0 |
| 3425 | 9 | MALIGNANT MELANOMA OF GROIN                              | 0 | 0 | 0 | 0 | 0 | 0 | 0 | 0 | 0 | 0 | 0 | 0 | 2 | 0 | 0 | 0 | 0 |
| 3426 | 9 | [M]Sebaceous adenocarcinoma                              | 0 | 0 | 0 | 0 | 0 | 0 | 0 | 0 | 0 | 0 | 0 | 0 | 2 | 0 | 0 | 0 | 0 |
| 3438 | 8 | MALIGNANT NEOPLASM OF PANCREAS NOS                       | 0 | 0 | 0 | 0 | 0 | 0 | 0 | 0 | 0 | 0 | 0 | 0 | 2 | 0 | 0 | 0 | 0 |
| 3439 | 5 | [M]VERRUCOUS CARCINOMA NOS                               | 0 | 0 | 0 | 0 | 0 | 0 | 0 | 0 | 0 | 0 | 0 | 0 | 2 | 0 | 0 | 0 | 0 |
| 3440 | 9 | Malignant neoplasm of base of tongue dorsal surface      | 0 | 0 | 0 | 0 | 0 | 0 | 0 | 0 | 0 | 0 | 0 | 0 | 2 | 0 | 0 | 0 | 0 |
| 3445 | 1 | Malignant neoplasm of connective and other soft tissue   | 0 | 0 | 0 | 0 | 0 | 0 | 0 | 0 | 0 | 0 | 0 | 0 | 2 | 0 | 0 | 0 | 0 |
| 3474 | 2 | MALIGNANT NEOPLASM OF PLEURA NOS                         | 0 | 0 | 0 | 0 | 0 | 0 | 0 | 0 | 0 | 0 | 0 | 0 | 2 | 0 | 0 | 0 | 0 |
| 3476 | 3 | [M]MEDULLOBLASTOMA NOS                                   | 0 | 0 | 0 | 0 | 0 | 0 | 0 | 0 | 0 | 0 | 0 | 0 | 2 | 0 | 0 | 0 | 0 |
| 3487 | 8 | MALIGNANT NEOPLASM OF MEDIAL CUNEIFORM                   | 0 | 0 | 0 | 0 | 0 | 0 | 0 | 0 | 0 | 0 | 0 | 0 | 2 | 0 | 0 | 0 | 0 |
| 3487 | 9 | [M]Cylindroid adenocarcinoma                             | 0 | 0 | 0 | 0 | 0 | 0 | 0 | 0 | 0 | 0 | 0 | 0 | 2 | 0 | 0 | 0 | 0 |
| 3503 | 4 | [M]FIBROXANTHOSARCOMA                                    | 0 | 0 | 0 | 0 | 0 | 0 | 0 | 0 | 0 | 0 | 0 | 0 | 2 | 0 | 0 | 0 | 0 |
| 3503 | 9 | MALIGNANT NEOPLASM, OVERLAPPING LESION OF BILIARY TRACT  | 0 | 0 | 0 | 0 | 0 | 0 | 0 | 0 | 0 | 0 | 0 | 0 | 2 | 0 | 0 | 0 | 0 |
| 3507 | 1 | [M]Mixed germ cell tumour                                | 0 | 0 | 0 | 0 | 0 | 0 | 0 | 0 | 0 | 0 | 0 | 0 | 2 | 0 | 0 | 0 | 0 |
| 3511 | 3 | [X]Malignant neoplasm of urinary tract                   | 0 | 0 | 0 | 0 | 0 | 0 | 0 | 0 | 0 | 0 | 0 | 0 | 2 | 0 | 0 | 0 | 0 |

|           |                                                              |   |   |   |   |   |   |   |   |   |   |   |   |   |   |   |   |   |   |
|-----------|--------------------------------------------------------------|---|---|---|---|---|---|---|---|---|---|---|---|---|---|---|---|---|---|
| 3518<br>0 | [X]Malignant neoplasm of digestive organs                    | 0 | 0 | 0 | 0 | 0 | 0 | 0 | 0 | 0 | 0 | 0 | 0 | 0 | 2 | 0 | 0 | 0 | 0 |
| 3522<br>3 | [M]Spermatocytic seminoma                                    | 0 | 0 | 0 | 0 | 0 | 0 | 0 | 0 | 0 | 0 | 0 | 0 | 0 | 2 | 0 | 0 | 0 | 0 |
| 3528<br>5 | [X]MALIGNANT NEOPLASM OF EYE, BRAIN AND OTHER PARTS OF CENT  | 0 | 0 | 0 | 0 | 0 | 0 | 0 | 0 | 0 | 0 | 0 | 0 | 0 | 2 | 0 | 0 | 0 | 0 |
| 3532<br>5 | [X]MALIGNANT NEOPLASM OF RESPIRATORY AND INTRATHORACIC ORGA  | 0 | 0 | 0 | 0 | 0 | 0 | 0 | 0 | 0 | 0 | 0 | 0 | 0 | 2 | 0 | 0 | 0 | 0 |
| 3534<br>8 | [M]Papillary adenocarcinoma NOS                              | 0 | 0 | 0 | 0 | 0 | 0 | 0 | 0 | 0 | 0 | 0 | 0 | 0 | 2 | 0 | 0 | 0 | 0 |
| 3535<br>7 | MALIGNANT NEOPLASM OF RECTUM, RECTOSIGMOID JUNCTION AND ANUS | 0 | 0 | 0 | 0 | 0 | 0 | 0 | 0 | 0 | 0 | 0 | 0 | 0 | 2 | 0 | 0 | 0 | 0 |
| 3545<br>7 | [M]Basosquamous carcinoma                                    | 0 | 0 | 0 | 0 | 0 | 0 | 0 | 0 | 0 | 0 | 0 | 0 | 0 | 2 | 0 | 0 | 0 | 0 |
| 3545<br>8 | Dukes stage C1                                               | 0 | 0 | 0 | 0 | 0 | 0 | 0 | 0 | 0 | 0 | 0 | 0 | 0 | 2 | 0 | 0 | 0 | 0 |
| 3547<br>4 | [M]Giant cell carcinoma                                      | 0 | 0 | 0 | 0 | 0 | 0 | 0 | 0 | 0 | 0 | 0 | 0 | 0 | 2 | 0 | 0 | 0 | 0 |
| 3553<br>5 | MALIGNANT NEOPLASM OF PANCREATIC DUCT                        | 0 | 0 | 0 | 0 | 0 | 0 | 0 | 0 | 0 | 0 | 0 | 0 | 0 | 2 | 0 | 0 | 0 | 0 |
| 3577<br>1 | [V]Personal history of malignant neoplasm of thyroid         | 0 | 0 | 0 | 0 | 0 | 0 | 0 | 0 | 0 | 0 | 0 | 0 | 0 | 2 | 0 | 0 | 0 | 0 |
| 3579<br>5 | Malignant neoplasm of Islets of Langerhans                   | 0 | 0 | 0 | 0 | 0 | 0 | 0 | 0 | 0 | 0 | 0 | 0 | 0 | 2 | 0 | 0 | 0 | 0 |
| 3581<br>6 | [V]Personal history of malignant neoplasm of bladder         | 0 | 0 | 0 | 0 | 0 | 0 | 0 | 0 | 0 | 0 | 0 | 0 | 0 | 2 | 0 | 0 | 0 | 0 |
| 3596<br>3 | Malignant neoplasm of lateral wall of urinary bladder        | 0 | 0 | 0 | 0 | 0 | 0 | 0 | 0 | 0 | 0 | 0 | 0 | 0 | 2 | 0 | 0 | 0 | 0 |
| 3616<br>1 | Malignant neoplasm of tongue, tip and lateral border         | 0 | 0 | 0 | 0 | 0 | 0 | 0 | 0 | 0 | 0 | 0 | 0 | 0 | 2 | 0 | 0 | 0 | 0 |
| 3632<br>1 | [V]Folow-up exam aft unspec treatment for malignant neoplasm | 0 | 0 | 0 | 0 | 0 | 0 | 0 | 0 | 0 | 0 | 0 | 0 | 0 | 2 | 0 | 0 | 0 | 0 |
| 3637<br>1 | MALIGNANT NEOPLASM OF OVERLAPPING LESION OF BRONCHUS & LUNG  | 0 | 0 | 0 | 0 | 0 | 0 | 0 | 0 | 0 | 0 | 0 | 0 | 0 | 2 | 0 | 0 | 0 | 0 |
| 3649<br>5 | Carcinoma common bile duct                                   | 0 | 0 | 0 | 0 | 0 | 0 | 0 | 0 | 0 | 0 | 0 | 0 | 0 | 2 | 0 | 0 | 0 | 0 |
| 3653<br>0 | [M]ALVEOLAR CELL CARCINOMA                                   | 0 | 0 | 0 | 0 | 0 | 0 | 0 | 0 | 0 | 0 | 0 | 0 | 0 | 2 | 0 | 0 | 0 | 0 |
| 3671<br>6 | Malignant neoplasm of floor of mouth NOS                     | 0 | 0 | 0 | 0 | 0 | 0 | 0 | 0 | 0 | 0 | 0 | 0 | 0 | 2 | 0 | 0 | 0 | 0 |
| 3673<br>1 | MALIGNANT NEOPLASM OF CANTHUS                                | 0 | 0 | 0 | 0 | 0 | 0 | 0 | 0 | 0 | 0 | 0 | 0 | 0 | 2 | 0 | 0 | 0 | 0 |
| 3687<br>0 | [M]Adenosarcoma                                              | 0 | 0 | 0 | 0 | 0 | 0 | 0 | 0 | 0 | 0 | 0 | 0 | 0 | 2 | 0 | 0 | 0 | 0 |
| 3687<br>6 | [M]Eosinophil carcinoma                                      | 0 | 0 | 0 | 0 | 0 | 0 | 0 | 0 | 0 | 0 | 0 | 0 | 0 | 2 | 0 | 0 | 0 | 0 |
| 3689<br>9 | MALIGNANT MELANOMA OF TOE                                    | 0 | 0 | 0 | 0 | 0 | 0 | 0 | 0 | 0 | 0 | 0 | 0 | 0 | 2 | 0 | 0 | 0 | 0 |

|           |                                                       |   |   |   |   |   |   |   |   |   |   |   |   |   |   |   |   |   |   |   |
|-----------|-------------------------------------------------------|---|---|---|---|---|---|---|---|---|---|---|---|---|---|---|---|---|---|---|
| 3694<br>9 | MALIGNANT NEOPLASM OF OTHER SITE OF URINARY BLADDER   | 0 | 0 | 0 | 0 | 0 | 0 | 0 | 0 | 0 | 0 | 0 | 0 | 0 | 2 | 0 | 0 | 0 | 0 | 0 |
| 3701<br>6 | Malignant neoplasm of sebaceous gland                 | 0 | 0 | 0 | 0 | 0 | 0 | 0 | 0 | 0 | 0 | 0 | 0 | 0 | 2 | 0 | 0 | 0 | 0 | 0 |
| 3709<br>6 | MALIGNANT NEOPLASM OF TONGUE, JUNCTIONAL ZONE         | 0 | 0 | 0 | 0 | 0 | 0 | 0 | 0 | 0 | 0 | 0 | 0 | 0 | 2 | 0 | 0 | 0 | 0 | 0 |
| 3716<br>5 | Malignant neoplasm of scalp                           | 0 | 0 | 0 | 0 | 0 | 0 | 0 | 0 | 0 | 0 | 0 | 0 | 0 | 2 | 0 | 0 | 0 | 0 | 0 |
| 3730<br>6 | [V]Personal history of malignant neoplasm of prostate | 0 | 0 | 0 | 0 | 0 | 0 | 0 | 0 | 0 | 0 | 0 | 0 | 0 | 2 | 0 | 0 | 0 | 0 | 0 |
| 3732<br>8 | Malignant neoplasm of vagina                          | 0 | 0 | 0 | 0 | 0 | 0 | 0 | 0 | 0 | 0 | 0 | 0 | 0 | 2 | 0 | 0 | 0 | 0 | 0 |
| 3735<br>4 | [M]CLEAR CELL ADENOCARCINOMA NOS                      | 0 | 0 | 0 | 0 | 0 | 0 | 0 | 0 | 0 | 0 | 0 | 0 | 0 | 2 | 0 | 0 | 0 | 0 | 0 |
| 3747<br>3 | [M]Cerebellar sarcoma NOS                             | 0 | 0 | 0 | 0 | 0 | 0 | 0 | 0 | 0 | 0 | 0 | 0 | 0 | 2 | 0 | 0 | 0 | 0 | 0 |
| 3747<br>7 | [M]Schwannoma, malignant                              | 0 | 0 | 0 | 0 | 0 | 0 | 0 | 0 | 0 | 0 | 0 | 0 | 0 | 2 | 0 | 0 | 0 | 0 | 0 |
| 3751<br>0 | [M]Carcinoma in pleomorphic adenoma                   | 0 | 0 | 0 | 0 | 0 | 0 | 0 | 0 | 0 | 0 | 0 | 0 | 0 | 2 | 0 | 0 | 0 | 0 | 0 |
| 3751<br>6 | Malignant neoplasm of uvula                           | 0 | 0 | 0 | 0 | 0 | 0 | 0 | 0 | 0 | 0 | 0 | 0 | 0 | 2 | 0 | 0 | 0 | 0 | 0 |
| 3754<br>2 | [M]TERATOCARCINOMA                                    | 0 | 0 | 0 | 0 | 0 | 0 | 0 | 0 | 0 | 0 | 0 | 0 | 0 | 2 | 0 | 0 | 0 | 0 | 0 |
| 3754<br>9 | KAPOSII'S SARCOMA OF PALATE                           | 0 | 0 | 0 | 0 | 0 | 0 | 0 | 0 | 0 | 0 | 0 | 0 | 0 | 2 | 0 | 0 | 0 | 0 | 0 |
| 3755<br>3 | Malignant neoplasm of lip                             | 0 | 0 | 0 | 0 | 0 | 0 | 0 | 0 | 0 | 0 | 0 | 0 | 0 | 2 | 0 | 0 | 0 | 0 | 0 |
| 3759<br>0 | MALIGNANT NEOPLASM OF HARD PALATE                     | 0 | 0 | 0 | 0 | 0 | 0 | 0 | 0 | 0 | 0 | 0 | 0 | 0 | 2 | 0 | 0 | 0 | 0 | 0 |
| 3761<br>8 | Malignant neoplasm of axilla NOS                      | 0 | 0 | 0 | 0 | 0 | 0 | 0 | 0 | 0 | 0 | 0 | 0 | 0 | 2 | 0 | 0 | 0 | 0 | 0 |
| 3762<br>1 | [M]ENDODERMAL SINUS TUMOUR                            | 0 | 0 | 0 | 0 | 0 | 0 | 0 | 0 | 0 | 0 | 0 | 0 | 0 | 2 | 0 | 0 | 0 | 0 | 0 |
| 3768<br>0 | [M]FIBROUS HISTIOCYTOMA, MALIGNANT                    | 0 | 0 | 0 | 0 | 0 | 0 | 0 | 0 | 0 | 0 | 0 | 0 | 0 | 2 | 0 | 0 | 0 | 0 | 0 |
| 3768<br>8 | [M]ACINAR CELL CARCINOMA                              | 0 | 0 | 0 | 0 | 0 | 0 | 0 | 0 | 0 | 0 | 0 | 0 | 0 | 2 | 0 | 0 | 0 | 0 | 0 |
| 3772<br>4 | MALIGNANT NEOPLASM OF RETROMOLAR AREA                 | 0 | 0 | 0 | 0 | 0 | 0 | 0 | 0 | 0 | 0 | 0 | 0 | 0 | 2 | 0 | 0 | 0 | 0 | 0 |
| 3779<br>3 | FIGO STAGING OF GYNAECOLOGICAL MALIGNANCY             | 0 | 0 | 0 | 0 | 0 | 0 | 0 | 0 | 0 | 0 | 0 | 0 | 0 | 2 | 0 | 0 | 0 | 0 | 0 |
| 3780<br>5 | MALIGNANT NEOPLASM OF CRICOID CARTILAGE               | 0 | 0 | 0 | 0 | 0 | 0 | 0 | 0 | 0 | 0 | 0 | 0 | 0 | 2 | 0 | 0 | 0 | 0 | 0 |
| 3781<br>0 | Malignant neoplasm of trachea NOS                     | 0 | 0 | 0 | 0 | 0 | 0 | 0 | 0 | 0 | 0 | 0 | 0 | 0 | 2 | 0 | 0 | 0 | 0 | 0 |
| 3784<br>2 | Malignant neoplasm of rib                             | 0 | 0 | 0 | 0 | 0 | 0 | 0 | 0 | 0 | 0 | 0 | 0 | 0 | 2 | 0 | 0 | 0 | 0 | 0 |

|           |                                                             |   |   |   |   |   |   |   |   |   |   |   |   |   |   |   |   |   |   |   |
|-----------|-------------------------------------------------------------|---|---|---|---|---|---|---|---|---|---|---|---|---|---|---|---|---|---|---|
| 3785<br>9 | MALIGNANT NEOPLASM OF CARDIA OF STOMACH NOS                 | 0 | 0 | 0 | 0 | 0 | 0 | 0 | 0 | 0 | 0 | 0 | 0 | 0 | 2 | 0 | 0 | 0 | 0 | 0 |
| 3787<br>2 | Malignant melanoma of lower leg                             | 0 | 0 | 0 | 0 | 0 | 0 | 0 | 0 | 0 | 0 | 0 | 0 | 0 | 2 | 0 | 0 | 0 | 0 | 0 |
| 3791<br>6 | Malignant neoplasm of other specified mouth parts           | 0 | 0 | 0 | 0 | 0 | 0 | 0 | 0 | 0 | 0 | 0 | 0 | 0 | 2 | 0 | 0 | 0 | 0 | 0 |
| 3794<br>0 | MALIGNANT NEOPLASM OF PHARYNGEAL RECESS                     | 0 | 0 | 0 | 0 | 0 | 0 | 0 | 0 | 0 | 0 | 0 | 0 | 0 | 2 | 0 | 0 | 0 | 0 | 0 |
| 3796<br>9 | Malignant neoplasm of skin of chest, excluding breast       | 0 | 0 | 0 | 0 | 0 | 0 | 0 | 0 | 0 | 0 | 0 | 0 | 0 | 2 | 0 | 0 | 0 | 0 | 0 |
| 3844<br>2 | [M]Serous cystadenocarcinoma, NOS                           | 0 | 0 | 0 | 0 | 0 | 0 | 0 | 0 | 0 | 0 | 0 | 0 | 0 | 2 | 0 | 0 | 0 | 0 | 0 |
| 3845<br>4 | [M]Basaloid carcinoma                                       | 0 | 0 | 0 | 0 | 0 | 0 | 0 | 0 | 0 | 0 | 0 | 0 | 0 | 2 | 0 | 0 | 0 | 0 | 0 |
| 3847<br>5 | Malignant neoplasm of other site of female breast NOS       | 0 | 0 | 0 | 0 | 0 | 0 | 0 | 0 | 0 | 0 | 0 | 0 | 0 | 2 | 0 | 0 | 0 | 0 | 0 |
| 3848<br>1 | [M]EPITHELIOID HAEMANGIOENDOTHELIOMA, MALIGNANT             | 0 | 0 | 0 | 0 | 0 | 0 | 0 | 0 | 0 | 0 | 0 | 0 | 0 | 2 | 0 | 0 | 0 | 0 | 0 |
| 3848<br>8 | Malignant neoplasm of ventral tongue surface NOS            | 0 | 0 | 0 | 0 | 0 | 0 | 0 | 0 | 0 | 0 | 0 | 0 | 0 | 2 | 0 | 0 | 0 | 0 | 0 |
| 3851<br>0 | MALIGNANT NEOPLASM OF TESTIS NOS                            | 0 | 0 | 0 | 0 | 0 | 0 | 0 | 0 | 0 | 0 | 0 | 0 | 0 | 2 | 0 | 0 | 0 | 0 | 0 |
| 3855<br>1 | [M]Gliomatosis cerebri                                      | 0 | 0 | 0 | 0 | 0 | 0 | 0 | 0 | 0 | 0 | 0 | 0 | 0 | 2 | 0 | 0 | 0 | 0 | 0 |
| 3857<br>5 | [M]APOCRINE ADENOCARCINOMA                                  | 0 | 0 | 0 | 0 | 0 | 0 | 0 | 0 | 0 | 0 | 0 | 0 | 0 | 2 | 0 | 0 | 0 | 0 | 0 |
| 3868<br>9 | Malignant melanoma of trunk (excluding scrotum)             | 0 | 0 | 0 | 0 | 0 | 0 | 0 | 0 | 0 | 0 | 0 | 0 | 0 | 2 | 0 | 0 | 0 | 0 | 0 |
| 3873<br>6 | MALIGNANT NEOPLASM OF OTHER AND UNSPECIFIED SITE OS         | 0 | 0 | 0 | 0 | 0 | 0 | 0 | 0 | 0 | 0 | 0 | 0 | 0 | 2 | 0 | 0 | 0 | 0 | 0 |
| 3875<br>6 | [M]Cystic mesothelioma                                      | 0 | 0 | 0 | 0 | 0 | 0 | 0 | 0 | 0 | 0 | 0 | 0 | 0 | 2 | 0 | 0 | 0 | 0 | 0 |
| 3877<br>0 | [M]EPITHELIAL-MYOEPITHELIAL CARCINOMA                       | 0 | 0 | 0 | 0 | 0 | 0 | 0 | 0 | 0 | 0 | 0 | 0 | 0 | 2 | 0 | 0 | 0 | 0 | 0 |
| 3886<br>2 | Malignant neoplasm of trigone of urinary bladder            | 0 | 0 | 0 | 0 | 0 | 0 | 0 | 0 | 0 | 0 | 0 | 0 | 0 | 2 | 0 | 0 | 0 | 0 | 0 |
| 3893<br>1 | Malignant neoplasm of genitourinary organ OS                | 0 | 0 | 0 | 0 | 0 | 0 | 0 | 0 | 0 | 0 | 0 | 0 | 0 | 2 | 0 | 0 | 0 | 0 | 0 |
| 3893<br>8 | Malignant neoplasm of pelvis                                | 0 | 0 | 0 | 0 | 0 | 0 | 0 | 0 | 0 | 0 | 0 | 0 | 0 | 2 | 0 | 0 | 0 | 0 | 0 |
| 3896<br>1 | Malignant neoplasm of other sites of bronchus or lung       | 0 | 0 | 0 | 0 | 0 | 0 | 0 | 0 | 0 | 0 | 0 | 0 | 0 | 2 | 0 | 0 | 0 | 0 | 0 |
| 3897<br>8 | MALIGNANT NEOPLASM OF LIVER AND INTRAHEPATIC BILE DUCTS NOS | 0 | 0 | 0 | 0 | 0 | 0 | 0 | 0 | 0 | 0 | 0 | 0 | 0 | 2 | 0 | 0 | 0 | 0 | 0 |
| 3902<br>7 | [X]MALIGNANT NEOPLASM OF OTHER SPECIFIED SITES              | 0 | 0 | 0 | 0 | 0 | 0 | 0 | 0 | 0 | 0 | 0 | 0 | 0 | 2 | 0 | 0 | 0 | 0 | 0 |
| 3903<br>8 | [M]SIGNET RING CARCINOMA                                    | 0 | 0 | 0 | 0 | 0 | 0 | 0 | 0 | 0 | 0 | 0 | 0 | 0 | 2 | 0 | 0 | 0 | 0 | 0 |

|           |                                                              |   |   |   |   |   |   |   |   |   |   |   |   |   |   |   |   |   |   |
|-----------|--------------------------------------------------------------|---|---|---|---|---|---|---|---|---|---|---|---|---|---|---|---|---|---|
| 3908<br>4 | Malignant neoplasm of laryngopharynx                         | 0 | 0 | 0 | 0 | 0 | 0 | 0 | 0 | 0 | 0 | 0 | 0 | 2 | 0 | 0 | 0 | 0 | 0 |
| 3908<br>8 | Malignant neoplasm of occipital lobe                         | 0 | 0 | 0 | 0 | 0 | 0 | 0 | 0 | 0 | 0 | 0 | 0 | 2 | 0 | 0 | 0 | 0 | 0 |
| 3912<br>1 | [M]Ganglioneuroblastoma                                      | 0 | 0 | 0 | 0 | 0 | 0 | 0 | 0 | 0 | 0 | 0 | 0 | 2 | 0 | 0 | 0 | 0 | 0 |
| 3938<br>6 | [M]MIXED GLIOMA                                              | 0 | 0 | 0 | 0 | 0 | 0 | 0 | 0 | 0 | 0 | 0 | 0 | 2 | 0 | 0 | 0 | 0 | 0 |
| 3938<br>8 | [M]OLFACTORY NEUROBLASTOMA                                   | 0 | 0 | 0 | 0 | 0 | 0 | 0 | 0 | 0 | 0 | 0 | 0 | 2 | 0 | 0 | 0 | 0 | 0 |
| 3941<br>3 | Malignant neoplasm of pelvic peritoneum                      | 0 | 0 | 0 | 0 | 0 | 0 | 0 | 0 | 0 | 0 | 0 | 0 | 2 | 0 | 0 | 0 | 0 | 0 |
| 3943<br>0 | MALIGNANT NEOPLASM OF LIP, ORAL CAVITY AND PHARYNX NOS       | 0 | 0 | 0 | 0 | 0 | 0 | 0 | 0 | 0 | 0 | 0 | 0 | 2 | 0 | 0 | 0 | 0 | 0 |
| 3953<br>1 | MALIG NEO, OVERLAPPING LESION OF HEART, MEDIASTINUM & PLEURA | 0 | 0 | 0 | 0 | 0 | 0 | 0 | 0 | 0 | 0 | 0 | 0 | 2 | 0 | 0 | 0 | 0 | 0 |
| 3955<br>4 | MALIGNANT NEOPLASM OF VALLECULA                              | 0 | 0 | 0 | 0 | 0 | 0 | 0 | 0 | 0 | 0 | 0 | 0 | 2 | 0 | 0 | 0 | 0 | 0 |
| 3959<br>0 | MALIGNANT NEOPLASM, OVERLAPPING LESION OF ACCESSORY SINUSES  | 0 | 0 | 0 | 0 | 0 | 0 | 0 | 0 | 0 | 0 | 0 | 0 | 2 | 0 | 0 | 0 | 0 | 0 |
| 3976<br>0 | [M]INFILTRATING DUCT AND LOBULAR CARCINOMA                   | 0 | 0 | 0 | 0 | 0 | 0 | 0 | 0 | 0 | 0 | 0 | 0 | 2 | 0 | 0 | 0 | 0 | 0 |
| 3986<br>3 | [V]Personal history of malignant neoplasm of nose            | 0 | 0 | 0 | 0 | 0 | 0 | 0 | 0 | 0 | 0 | 0 | 0 | 2 | 0 | 0 | 0 | 0 | 0 |
| 3987<br>0 | Malignant neoplasm of tail of pancreas                       | 0 | 0 | 0 | 0 | 0 | 0 | 0 | 0 | 0 | 0 | 0 | 0 | 2 | 0 | 0 | 0 | 0 | 0 |
| 3987<br>8 | MALIGNANT MELANOMA OF POPLITEAL FOSSA AREA                   | 0 | 0 | 0 | 0 | 0 | 0 | 0 | 0 | 0 | 0 | 0 | 0 | 2 | 0 | 0 | 0 | 0 | 0 |
| 3989<br>7 | MALIGNANT NEOPLASM OF PYRIFORM SINUS                         | 0 | 0 | 0 | 0 | 0 | 0 | 0 | 0 | 0 | 0 | 0 | 0 | 2 | 0 | 0 | 0 | 0 | 0 |
| 3989<br>9 | MALIGNANT NEOPLASM OF CRANIOPHARYNGEAL DUCT                  | 0 | 0 | 0 | 0 | 0 | 0 | 0 | 0 | 0 | 0 | 0 | 0 | 2 | 0 | 0 | 0 | 0 | 0 |
| 3992<br>3 | Malignant neoplasm of middle lobe of lung                    | 0 | 0 | 0 | 0 | 0 | 0 | 0 | 0 | 0 | 0 | 0 | 0 | 2 | 0 | 0 | 0 | 0 | 0 |
| 4001<br>4 | Malignant neoplasm of soft tissue of face                    | 0 | 0 | 0 | 0 | 0 | 0 | 0 | 0 | 0 | 0 | 0 | 0 | 2 | 0 | 0 | 0 | 0 | 0 |
| 4024<br>0 | [M]HEPATOCELLULAR CARCINOMA NOS                              | 0 | 0 | 0 | 0 | 0 | 0 | 0 | 0 | 0 | 0 | 0 | 0 | 2 | 0 | 0 | 0 | 0 | 0 |
| 4029<br>2 | MALIGNANT NEOPLASM OF SOFT PALATE                            | 0 | 0 | 0 | 0 | 0 | 0 | 0 | 0 | 0 | 0 | 0 | 0 | 2 | 0 | 0 | 0 | 0 | 0 |
| 4030<br>3 | [M]MIXED EPITHELIOID AND SPINDLE MELANOMA                    | 0 | 0 | 0 | 0 | 0 | 0 | 0 | 0 | 0 | 0 | 0 | 0 | 2 | 0 | 0 | 0 | 0 | 0 |
| 4035<br>9 | [M]JUVENILE BREAST CARCINOMA                                 | 0 | 0 | 0 | 0 | 0 | 0 | 0 | 0 | 0 | 0 | 0 | 0 | 2 | 0 | 0 | 0 | 0 | 0 |
| 4043<br>7 | MALIGNANT NEOPLASM OF OTHER SPECIFIED SITE OF EYE            | 0 | 0 | 0 | 0 | 0 | 0 | 0 | 0 | 0 | 0 | 0 | 0 | 2 | 0 | 0 | 0 | 0 | 0 |
| 4043<br>8 | [M]Bile duct carcinoma                                       | 0 | 0 | 0 | 0 | 0 | 0 | 0 | 0 | 0 | 0 | 0 | 0 | 2 | 0 | 0 | 0 | 0 | 0 |





|      |   |                                                             |   |   |   |   |   |   |   |   |   |   |   |   |   |   |   |   |   |   |
|------|---|-------------------------------------------------------------|---|---|---|---|---|---|---|---|---|---|---|---|---|---|---|---|---|---|
| 4157 | 1 | Malignant neoplasm of bladder neck                          | 0 | 0 | 0 | 0 | 0 | 0 | 0 | 0 | 0 | 0 | 0 | 0 | 2 | 0 | 0 | 0 | 0 | 0 |
| 4169 | 5 | [M]Primitive neuroectodermal tumour                         | 0 | 0 | 0 | 0 | 0 | 0 | 0 | 0 | 0 | 0 | 0 | 0 | 2 | 0 | 0 | 0 | 0 | 0 |
| 4181 | 6 | [M]SQUAMOUS CELL CARCINOMA, SMALL CELL, NON-KERATINISING    | 0 | 0 | 0 | 0 | 0 | 0 | 0 | 0 | 0 | 0 | 0 | 0 | 2 | 0 | 0 | 0 | 0 | 0 |
| 4193 | 1 | MALIGNANT NEOPLASM OF CHEEK NOS                             | 0 | 0 | 0 | 0 | 0 | 0 | 0 | 0 | 0 | 0 | 0 | 0 | 2 | 0 | 0 | 0 | 0 | 0 |
| 4195 | 8 | MALIGNANT NEOPLASM OF LOWER EYELID                          | 0 | 0 | 0 | 0 | 0 | 0 | 0 | 0 | 0 | 0 | 0 | 0 | 2 | 0 | 0 | 0 | 0 | 0 |
| 4201 | 2 | MALIGNANT NEOPLASM OF POSTERIOR WALL OF URINARY BLADDER     | 0 | 0 | 0 | 0 | 0 | 0 | 0 | 0 | 0 | 0 | 0 | 0 | 2 | 0 | 0 | 0 | 0 | 0 |
| 4202 | 3 | MALIGNANT NEOPLASM OF URACHUS                               | 0 | 0 | 0 | 0 | 0 | 0 | 0 | 0 | 0 | 0 | 0 | 0 | 2 | 0 | 0 | 0 | 0 | 0 |
| 4207 | 0 | MALIGNANT NEOPLASM OF LOWER-OUTER QUADRANT OF FEMALE BREAST | 0 | 0 | 0 | 0 | 0 | 0 | 0 | 0 | 0 | 0 | 0 | 0 | 2 | 0 | 0 | 0 | 0 | 0 |
| 4208 | 2 | [M]Alveolar rhabdomyosarcoma                                | 0 | 0 | 0 | 0 | 0 | 0 | 0 | 0 | 0 | 0 | 0 | 0 | 2 | 0 | 0 | 0 | 0 | 0 |
| 4215 | 3 | MALIGNANT MELANOMA OF OTHER SPECIFIED SKIN SITE             | 0 | 0 | 0 | 0 | 0 | 0 | 0 | 0 | 0 | 0 | 0 | 0 | 2 | 0 | 0 | 0 | 0 | 0 |
| 4219 | 3 | MALIGNANT NEOPLASM OF LESSER CURVE OF STOMACH UNSPECIFIED   | 0 | 0 | 0 | 0 | 0 | 0 | 0 | 0 | 0 | 0 | 0 | 0 | 2 | 0 | 0 | 0 | 0 | 0 |
| 4221 | 8 | Malignant neoplasm of other specified sites                 | 0 | 0 | 0 | 0 | 0 | 0 | 0 | 0 | 0 | 0 | 0 | 0 | 2 | 0 | 0 | 0 | 0 | 0 |
| 4236 | 1 | Dukes stage C2                                              | 0 | 0 | 0 | 0 | 0 | 0 | 0 | 0 | 0 | 0 | 0 | 0 | 2 | 0 | 0 | 0 | 0 | 0 |
| 4241 | 6 | Malignant neoplasm of lower third of oesophagus             | 0 | 0 | 0 | 0 | 0 | 0 | 0 | 0 | 0 | 0 | 0 | 0 | 2 | 0 | 0 | 0 | 0 | 0 |
| 4242 | 6 | Malignant neoplasm of frontal lobe                          | 0 | 0 | 0 | 0 | 0 | 0 | 0 | 0 | 0 | 0 | 0 | 0 | 2 | 0 | 0 | 0 | 0 | 0 |
| 4242 | 9 | Malignant neoplasm overlapping lesion of skin               | 0 | 0 | 0 | 0 | 0 | 0 | 0 | 0 | 0 | 0 | 0 | 0 | 2 | 0 | 0 | 0 | 0 | 0 |
| 4246 | 0 | Malignant neoplasm of pineal gland                          | 0 | 0 | 0 | 0 | 0 | 0 | 0 | 0 | 0 | 0 | 0 | 0 | 2 | 0 | 0 | 0 | 0 | 0 |
| 4250 | 9 | [V]FOLLOW-UP EXAM AFT COMBINED TREATMENT FOR MALIG NEOPLASM | 0 | 0 | 0 | 0 | 0 | 0 | 0 | 0 | 0 | 0 | 0 | 0 | 2 | 0 | 0 | 0 | 0 | 0 |
| 4254 | 2 | [M]PAGET'S DISEASE AND INFILTRATING BREAST DUCT CARCINOMA   | 0 | 0 | 0 | 0 | 0 | 0 | 0 | 0 | 0 | 0 | 0 | 0 | 2 | 0 | 0 | 0 | 0 | 0 |
| 4255 | 3 | [M]Adenocarcinoma with cartilaginous and osseous metaplasia | 0 | 0 | 0 | 0 | 0 | 0 | 0 | 0 | 0 | 0 | 0 | 0 | 2 | 0 | 0 | 0 | 0 | 0 |
| 4256 | 6 | MALIGNANT NEOPLASM OF LOWER LOBE, BRONCHUS OR LUNG NOS      | 0 | 0 | 0 | 0 | 0 | 0 | 0 | 0 | 0 | 0 | 0 | 0 | 2 | 0 | 0 | 0 | 0 | 0 |
| 4256 | 9 | MALIGNANT NEOPLASM OF RESPIRATORY TRACT NOS                 | 0 | 0 | 0 | 0 | 0 | 0 | 0 | 0 | 0 | 0 | 0 | 0 | 2 | 0 | 0 | 0 | 0 | 0 |
| 4270 | 7 | MALIGNANT NEOPLASM OF SKIN OF UPPER ARM                     | 0 | 0 | 0 | 0 | 0 | 0 | 0 | 0 | 0 | 0 | 0 | 0 | 2 | 0 | 0 | 0 | 0 | 0 |
| 4271 | 4 | Malignant melanoma of ankle                                 | 0 | 0 | 0 | 0 | 0 | 0 | 0 | 0 | 0 | 0 | 0 | 0 | 2 | 0 | 0 | 0 | 0 | 0 |

|      |   |                                                              |   |   |   |   |   |   |   |   |   |   |   |   |   |   |   |   |   |
|------|---|--------------------------------------------------------------|---|---|---|---|---|---|---|---|---|---|---|---|---|---|---|---|---|
| 4285 | 6 | Malignant neoplasm of nasal cavities NOS                     | 0 | 0 | 0 | 0 | 0 | 0 | 0 | 0 | 0 | 0 | 0 | 0 | 2 | 0 | 0 | 0 | 0 |
| 4308 | 7 | Malignant neoplasm of eyelid including canthus               | 0 | 0 | 0 | 0 | 0 | 0 | 0 | 0 | 0 | 0 | 0 | 0 | 2 | 0 | 0 | 0 | 0 |
| 4311 | 1 | Malignant neoplasm of laryngeal cartilage                    | 0 | 0 | 0 | 0 | 0 | 0 | 0 | 0 | 0 | 0 | 0 | 0 | 2 | 0 | 0 | 0 | 0 |
| 4312 | 2 | Malignant neoplasm of skin of shoulder                       | 0 | 0 | 0 | 0 | 0 | 0 | 0 | 0 | 0 | 0 | 0 | 0 | 2 | 0 | 0 | 0 | 0 |
| 4315 | 1 | [X]Malignant neoplasm/bone+articular cartilage, unspecified  | 0 | 0 | 0 | 0 | 0 | 0 | 0 | 0 | 0 | 0 | 0 | 0 | 2 | 0 | 0 | 0 | 0 |
| 4320 | 0 | MALIGNANT NEOPLASM OF OROPHARYNX NOS                         | 0 | 0 | 0 | 0 | 0 | 0 | 0 | 0 | 0 | 0 | 0 | 0 | 2 | 0 | 0 | 0 | 0 |
| 4331 | 1 | [V]Personal history of malignant neoplasm of larynx          | 0 | 0 | 0 | 0 | 0 | 0 | 0 | 0 | 0 | 0 | 0 | 0 | 2 | 0 | 0 | 0 | 0 |
| 4339 | 0 | MALIGNANT NEOPLASM OF SMALL INTESTINE NOS                    | 0 | 0 | 0 | 0 | 0 | 0 | 0 | 0 | 0 | 0 | 0 | 0 | 2 | 0 | 0 | 0 | 0 |
| 4339 | 2 | Malignant neoplasm of penis, part unspecified                | 0 | 0 | 0 | 0 | 0 | 0 | 0 | 0 | 0 | 0 | 0 | 0 | 2 | 0 | 0 | 0 | 0 |
| 4340 | 0 | MALIGNANT NEOPLASM OF GUM                                    | 0 | 0 | 0 | 0 | 0 | 0 | 0 | 0 | 0 | 0 | 0 | 0 | 2 | 0 | 0 | 0 | 0 |
| 4343 | 1 | Malignant neoplasm of base of tongue                         | 0 | 0 | 0 | 0 | 0 | 0 | 0 | 0 | 0 | 0 | 0 | 0 | 2 | 0 | 0 | 0 | 0 |
| 4343 | 5 | MALIGNANT NEOPLASM OF OTHER SITE OF CERVIX NOS               | 0 | 0 | 0 | 0 | 0 | 0 | 0 | 0 | 0 | 0 | 0 | 0 | 2 | 0 | 0 | 0 | 0 |
| 4346 | 3 | MALIGNANT MELANOMA OF BACK                                   | 0 | 0 | 0 | 0 | 0 | 0 | 0 | 0 | 0 | 0 | 0 | 0 | 2 | 0 | 0 | 0 | 0 |
| 4347 | 5 | MALIG NEOP OF CONNECTIVE AND SOFT TISSUE HEAD, FACE AND NECK | 0 | 0 | 0 | 0 | 0 | 0 | 0 | 0 | 0 | 0 | 0 | 0 | 2 | 0 | 0 | 0 | 0 |
| 4347 | 9 | Malignant neoplasm of jejunum                                | 0 | 0 | 0 | 0 | 0 | 0 | 0 | 0 | 0 | 0 | 0 | 0 | 2 | 0 | 0 | 0 | 0 |
| 4349 | 0 | [X]OTHER SPECIFIED CARCINOMAS OF LIVER                       | 0 | 0 | 0 | 0 | 0 | 0 | 0 | 0 | 0 | 0 | 0 | 0 | 2 | 0 | 0 | 0 | 0 |
| 4354 | 8 | MALIGNANT NEOPLASM OF POSTCRICOID REGION                     | 0 | 0 | 0 | 0 | 0 | 0 | 0 | 0 | 0 | 0 | 0 | 0 | 2 | 0 | 0 | 0 | 0 |
| 4357 | 2 | MALIGNANT NEOPLASM OF BODY OF STOMACH                        | 0 | 0 | 0 | 0 | 0 | 0 | 0 | 0 | 0 | 0 | 0 | 0 | 2 | 0 | 0 | 0 | 0 |
| 4361 | 4 | MALIGNANT NEOPLASM/BONES+ARTICULAR CARTILAGE/LIMB,UNSPFD     | 0 | 0 | 0 | 0 | 0 | 0 | 0 | 0 | 0 | 0 | 0 | 0 | 2 | 0 | 0 | 0 | 0 |
| 4361 | 9 | MALIGNANT NEOPLASM OF SKIN OF NECK                           | 0 | 0 | 0 | 0 | 0 | 0 | 0 | 0 | 0 | 0 | 0 | 0 | 2 | 0 | 0 | 0 | 0 |
| 4364 | 2 | Malignant neoplasm of dorsal surface of tongue               | 0 | 0 | 0 | 0 | 0 | 0 | 0 | 0 | 0 | 0 | 0 | 0 | 2 | 0 | 0 | 0 | 0 |
| 4371 | 5 | MALIGNANT MELANOMA OF UMBILICUS                              | 0 | 0 | 0 | 0 | 0 | 0 | 0 | 0 | 0 | 0 | 0 | 0 | 2 | 0 | 0 | 0 | 0 |
| 4371 | 7 | [M]Verrucous epidermoid carcinoma                            | 0 | 0 | 0 | 0 | 0 | 0 | 0 | 0 | 0 | 0 | 0 | 0 | 2 | 0 | 0 | 0 | 0 |
| 4376 | 1 | Malignant neoplasm of labia majora                           | 0 | 0 | 0 | 0 | 0 | 0 | 0 | 0 | 0 | 0 | 0 | 0 | 2 | 0 | 0 | 0 | 0 |

|           |                                                              |   |   |   |   |   |   |   |   |   |   |   |   |   |   |   |   |   |   |   |
|-----------|--------------------------------------------------------------|---|---|---|---|---|---|---|---|---|---|---|---|---|---|---|---|---|---|---|
| 4378<br>1 | MALIGNANT NEOPLASM OF DORSUM OF TONGUE NOS                   | 0 | 0 | 0 | 0 | 0 | 0 | 0 | 0 | 0 | 0 | 0 | 0 | 0 | 2 | 0 | 0 | 0 | 0 | 0 |
| 4386<br>5 | [M]IMMATURE TERATOMA                                         | 0 | 0 | 0 | 0 | 0 | 0 | 0 | 0 | 0 | 0 | 0 | 0 | 0 | 2 | 0 | 0 | 0 | 0 | 0 |
| 4394<br>0 | Malignant neoplasm of isthmus of uterine body                | 0 | 0 | 0 | 0 | 0 | 0 | 0 | 0 | 0 | 0 | 0 | 0 | 0 | 2 | 0 | 0 | 0 | 0 | 0 |
| 4406<br>1 | [M]SPINDLE CELL MELANOMA NOS                                 | 0 | 0 | 0 | 0 | 0 | 0 | 0 | 0 | 0 | 0 | 0 | 0 | 0 | 2 | 0 | 0 | 0 | 0 | 0 |
| 4407<br>4 | [M]Mucin-producing adenocarcinoma                            | 0 | 0 | 0 | 0 | 0 | 0 | 0 | 0 | 0 | 0 | 0 | 0 | 0 | 2 | 0 | 0 | 0 | 0 | 0 |
| 4408<br>9 | Malignant neoplasm of brain stem                             | 0 | 0 | 0 | 0 | 0 | 0 | 0 | 0 | 0 | 0 | 0 | 0 | 0 | 2 | 0 | 0 | 0 | 0 | 0 |
| 4410<br>8 | Malignant neoplasm of retroperitoneum and peritoneum         | 0 | 0 | 0 | 0 | 0 | 0 | 0 | 0 | 0 | 0 | 0 | 0 | 0 | 2 | 0 | 0 | 0 | 0 | 0 |
| 4413<br>9 | MALIGNANT NEOPLASM OF ANTERIOR WALL OF NASOPHARYNX           | 0 | 0 | 0 | 0 | 0 | 0 | 0 | 0 | 0 | 0 | 0 | 0 | 0 | 2 | 0 | 0 | 0 | 0 | 0 |
| 4415<br>7 | [M]Melanosarcoma NOS                                         | 0 | 0 | 0 | 0 | 0 | 0 | 0 | 0 | 0 | 0 | 0 | 0 | 0 | 2 | 0 | 0 | 0 | 0 | 0 |
| 4416<br>9 | MALIGNANT NEOPLASM OF UPPER LOBE, BRONCHUS OR LUNG NOS       | 0 | 0 | 0 | 0 | 0 | 0 | 0 | 0 | 0 | 0 | 0 | 0 | 0 | 2 | 0 | 0 | 0 | 0 | 0 |
| 4435<br>6 | Malig neop other/ill-defined sites resp/intrathoracic organs | 0 | 0 | 0 | 0 | 0 | 0 | 0 | 0 | 0 | 0 | 0 | 0 | 0 | 2 | 0 | 0 | 0 | 0 | 0 |
| 4439<br>9 | PRIMARY MALIGNANT NEOPLASM OF LIVER NOS                      | 0 | 0 | 0 | 0 | 0 | 0 | 0 | 0 | 0 | 0 | 0 | 0 | 0 | 2 | 0 | 0 | 0 | 0 | 0 |
| 4442<br>1 | [V]Folow-up exam aft other treatment for malignant neoplasm  | 0 | 0 | 0 | 0 | 0 | 0 | 0 | 0 | 0 | 0 | 0 | 0 | 0 | 2 | 0 | 0 | 0 | 0 | 0 |
| 4445<br>2 | Malignant neoplasm of vomer                                  | 0 | 0 | 0 | 0 | 0 | 0 | 0 | 0 | 0 | 0 | 0 | 0 | 0 | 2 | 0 | 0 | 0 | 0 | 0 |
| 4460<br>9 | Malignant neoplasm of ilium                                  | 0 | 0 | 0 | 0 | 0 | 0 | 0 | 0 | 0 | 0 | 0 | 0 | 0 | 2 | 0 | 0 | 0 | 0 | 0 |
| 4477<br>8 | [M]Adenocarcinoma in tubulovillous adenoma                   | 0 | 0 | 0 | 0 | 0 | 0 | 0 | 0 | 0 | 0 | 0 | 0 | 0 | 2 | 0 | 0 | 0 | 0 | 0 |
| 4480<br>5 | MALIG NEOP OF CONNECTIVE AND SOFT TISSUE THIGH AND UPPER LEG | 0 | 0 | 0 | 0 | 0 | 0 | 0 | 0 | 0 | 0 | 0 | 0 | 0 | 2 | 0 | 0 | 0 | 0 | 0 |
| 4488<br>4 | Malignant neoplasm of other urinary organs                   | 0 | 0 | 0 | 0 | 0 | 0 | 0 | 0 | 0 | 0 | 0 | 0 | 0 | 2 | 0 | 0 | 0 | 0 | 0 |
| 4493<br>0 | [M]Papillary serous cystadenocarcinoma                       | 0 | 0 | 0 | 0 | 0 | 0 | 0 | 0 | 0 | 0 | 0 | 0 | 0 | 2 | 0 | 0 | 0 | 0 | 0 |
| 4499<br>6 | Malignant neoplasm of dome of urinary bladder                | 0 | 0 | 0 | 0 | 0 | 0 | 0 | 0 | 0 | 0 | 0 | 0 | 0 | 2 | 0 | 0 | 0 | 0 | 0 |
| 4507<br>1 | MALIGNANT NEOPLASM OF CONNECTIVE AND SOFT TISSUE OF ABDOMEN  | 0 | 0 | 0 | 0 | 0 | 0 | 0 | 0 | 0 | 0 | 0 | 0 | 0 | 2 | 0 | 0 | 0 | 0 | 0 |
| 4507<br>7 | Malignant neoplasm of skin of back                           | 0 | 0 | 0 | 0 | 0 | 0 | 0 | 0 | 0 | 0 | 0 | 0 | 0 | 2 | 0 | 0 | 0 | 0 | 0 |
| 4513<br>9 | MALIGNANT MELANOMA OF EXTERNAL SURFACE OF NOSE               | 0 | 0 | 0 | 0 | 0 | 0 | 0 | 0 | 0 | 0 | 0 | 0 | 0 | 2 | 0 | 0 | 0 | 0 | 0 |
| 4515<br>4 | MALIGNANT NEOPLASM OF CEREBELLUM                             | 0 | 0 | 0 | 0 | 0 | 0 | 0 | 0 | 0 | 0 | 0 | 0 | 0 | 2 | 0 | 0 | 0 | 0 | 0 |

|           |                                                              |   |   |   |   |   |   |   |   |   |   |   |   |   |   |   |   |   |   |   |
|-----------|--------------------------------------------------------------|---|---|---|---|---|---|---|---|---|---|---|---|---|---|---|---|---|---|---|
| 4522<br>2 | MALIGNANT NEOPLASM OF LOWER-INNER QUADRANT OF FEMALE BREAST  | 0 | 0 | 0 | 0 | 0 | 0 | 0 | 0 | 0 | 0 | 0 | 0 | 0 | 2 | 0 | 0 | 0 | 0 | 0 |
| 4526<br>0 | [X]Malignant neoplasm of urinary organ                       | 0 | 0 | 0 | 0 | 0 | 0 | 0 | 0 | 0 | 0 | 0 | 0 | 0 | 2 | 0 | 0 | 0 | 0 | 0 |
| 4526<br>2 | [X]MALIGNANT NEOPLASM OF MALE GENITAL ORGAN, UNSPECIFIED     | 0 | 0 | 0 | 0 | 0 | 0 | 0 | 0 | 0 | 0 | 0 | 0 | 0 | 2 | 0 | 0 | 0 | 0 | 0 |
| 4526<br>7 | Malignant neoplasm of other and ill defined site NOS         | 0 | 0 | 0 | 0 | 0 | 0 | 0 | 0 | 0 | 0 | 0 | 0 | 0 | 2 | 0 | 0 | 0 | 0 | 0 |
| 4530<br>6 | MALIGNANT MELANOMA OF NECK                                   | 0 | 0 | 0 | 0 | 0 | 0 | 0 | 0 | 0 | 0 | 0 | 0 | 0 | 2 | 0 | 0 | 0 | 0 | 0 |
| 4530<br>7 | CARCINOMA OF RESPIRATORY TRACT AND INTRATHORACIC ORGANS      | 0 | 0 | 0 | 0 | 0 | 0 | 0 | 0 | 0 | 0 | 0 | 0 | 0 | 2 | 0 | 0 | 0 | 0 | 0 |
| 4540<br>8 | Malignant neoplasm of anterior portion of floor of mouth     | 0 | 0 | 0 | 0 | 0 | 0 | 0 | 0 | 0 | 0 | 0 | 0 | 0 | 2 | 0 | 0 | 0 | 0 | 0 |
| 4545<br>8 | [M]SQUAMOUS CELL CARCINOMA, SPINDLE CELL TYPE                | 0 | 0 | 0 | 0 | 0 | 0 | 0 | 0 | 0 | 0 | 0 | 0 | 0 | 2 | 0 | 0 | 0 | 0 | 0 |
| 4549<br>0 | Malignant neoplasm of corpus uteri NOS                       | 0 | 0 | 0 | 0 | 0 | 0 | 0 | 0 | 0 | 0 | 0 | 0 | 0 | 2 | 0 | 0 | 0 | 0 | 0 |
| 4551<br>0 | [M]LYMPHOEPITHELIAL CARCINOMA                                | 0 | 0 | 0 | 0 | 0 | 0 | 0 | 0 | 0 | 0 | 0 | 0 | 0 | 2 | 0 | 0 | 0 | 0 | 0 |
| 4553<br>1 | [M]GEMISTOCYTIC ASTROCYTOMA                                  | 0 | 0 | 0 | 0 | 0 | 0 | 0 | 0 | 0 | 0 | 0 | 0 | 0 | 2 | 0 | 0 | 0 | 0 | 0 |
| 4566<br>7 | MALIGNANT NEOPLASM OF ORBIT                                  | 0 | 0 | 0 | 0 | 0 | 0 | 0 | 0 | 0 | 0 | 0 | 0 | 0 | 2 | 0 | 0 | 0 | 0 | 0 |
| 4575<br>5 | Malignant melanoma of fore-arm                               | 0 | 0 | 0 | 0 | 0 | 0 | 0 | 0 | 0 | 0 | 0 | 0 | 0 | 2 | 0 | 0 | 0 | 0 | 0 |
| 4576<br>0 | Malignant melanoma of trunk, excluding scrotum, NOS          | 0 | 0 | 0 | 0 | 0 | 0 | 0 | 0 | 0 | 0 | 0 | 0 | 0 | 2 | 0 | 0 | 0 | 0 | 0 |
| 4576<br>6 | [X]Malignant neoplasm of intestinal tract, part unspecified  | 0 | 0 | 0 | 0 | 0 | 0 | 0 | 0 | 0 | 0 | 0 | 0 | 0 | 2 | 0 | 0 | 0 | 0 | 0 |
| 4579<br>3 | Malignant neoplasm of myometrium of corpus uteri             | 0 | 0 | 0 | 0 | 0 | 0 | 0 | 0 | 0 | 0 | 0 | 0 | 0 | 2 | 0 | 0 | 0 | 0 | 0 |
| 4580<br>3 | [V]Personal history of malignant neoplasm of tongue          | 0 | 0 | 0 | 0 | 0 | 0 | 0 | 0 | 0 | 0 | 0 | 0 | 0 | 2 | 0 | 0 | 0 | 0 | 0 |
| 4592<br>2 | Malignant neoplasm, overlapping lesion of eye and adnexa     | 0 | 0 | 0 | 0 | 0 | 0 | 0 | 0 | 0 | 0 | 0 | 0 | 0 | 2 | 0 | 0 | 0 | 0 | 0 |
| 4598<br>6 | Malignant neoplasm of lateral portion of floor of mouth      | 0 | 0 | 0 | 0 | 0 | 0 | 0 | 0 | 0 | 0 | 0 | 0 | 0 | 2 | 0 | 0 | 0 | 0 | 0 |
| 4600<br>8 | Malignant neoplasm skin other and unspec part of face NOS    | 0 | 0 | 0 | 0 | 0 | 0 | 0 | 0 | 0 | 0 | 0 | 0 | 0 | 2 | 0 | 0 | 0 | 0 | 0 |
| 4611<br>3 | [M]PAPILLARY CYSTADENOMA, BORDERLINE MALIGNANCY              | 0 | 0 | 0 | 0 | 0 | 0 | 0 | 0 | 0 | 0 | 0 | 0 | 0 | 2 | 0 | 0 | 0 | 0 | 0 |
| 4611<br>4 | MALIG NEOP OTHER/ILL-DEFINED SITES LIP, ORAL CAVITY, PHARYNX | 0 | 0 | 0 | 0 | 0 | 0 | 0 | 0 | 0 | 0 | 0 | 0 | 0 | 2 | 0 | 0 | 0 | 0 | 0 |
| 4615<br>3 | MALIGNANT NEOPLASM OF PARAMETRIUM                            | 0 | 0 | 0 | 0 | 0 | 0 | 0 | 0 | 0 | 0 | 0 | 0 | 0 | 2 | 0 | 0 | 0 | 0 | 0 |
| 4615<br>9 | MALIGNANT NEOPLASM OF CLOACOGENIC ZONE                       | 0 | 0 | 0 | 0 | 0 | 0 | 0 | 0 | 0 | 0 | 0 | 0 | 0 | 2 | 0 | 0 | 0 | 0 | 0 |

|           |                                                           |   |   |   |   |   |   |   |   |   |   |   |   |   |   |   |   |   |   |
|-----------|-----------------------------------------------------------|---|---|---|---|---|---|---|---|---|---|---|---|---|---|---|---|---|---|
| 4625<br>5 | MALIGNANT MELANOMA OF LOWER LIMB AND HIP                  | 0 | 0 | 0 | 0 | 0 | 0 | 0 | 0 | 0 | 0 | 0 | 0 | 0 | 2 | 0 | 0 | 0 | 0 |
| 4628<br>2 | [V]Personal history of malignant neoplasm of bone         | 0 | 0 | 0 | 0 | 0 | 0 | 0 | 0 | 0 | 0 | 0 | 0 | 0 | 2 | 0 | 0 | 0 | 0 |
| 4640<br>4 | [M]OLIGODENDROBLASTOMA                                    | 0 | 0 | 0 | 0 | 0 | 0 | 0 | 0 | 0 | 0 | 0 | 0 | 0 | 2 | 0 | 0 | 0 | 0 |
| 4645<br>8 | Malignant neoplasm of skin of perineum                    | 0 | 0 | 0 | 0 | 0 | 0 | 0 | 0 | 0 | 0 | 0 | 0 | 0 | 2 | 0 | 0 | 0 | 0 |
| 4654<br>8 | Malignant neoplasm of pharyngeal tonsil                   | 0 | 0 | 0 | 0 | 0 | 0 | 0 | 0 | 0 | 0 | 0 | 0 | 0 | 2 | 0 | 0 | 0 | 0 |
| 4658<br>1 | [M]Pleomorphic cell sarcoma                               | 0 | 0 | 0 | 0 | 0 | 0 | 0 | 0 | 0 | 0 | 0 | 0 | 0 | 2 | 0 | 0 | 0 | 0 |
| 4661<br>3 | Malignant neoplasm of specified parts of peritoneum       | 0 | 0 | 0 | 0 | 0 | 0 | 0 | 0 | 0 | 0 | 0 | 0 | 0 | 2 | 0 | 0 | 0 | 0 |
| 4672<br>8 | MALIGNANT NEOPLASM OF ANTERIOR EPIGLOTTIS                 | 0 | 0 | 0 | 0 | 0 | 0 | 0 | 0 | 0 | 0 | 0 | 0 | 0 | 2 | 0 | 0 | 0 | 0 |
| 4674<br>1 | [M]AMELOBLASTIC ODONTOSARCOMA                             | 0 | 0 | 0 | 0 | 0 | 0 | 0 | 0 | 0 | 0 | 0 | 0 | 0 | 2 | 0 | 0 | 0 | 0 |
| 4676<br>1 | [M]PAPILLARY AND FOLLICULAR ADENOCARCINOMA                | 0 | 0 | 0 | 0 | 0 | 0 | 0 | 0 | 0 | 0 | 0 | 0 | 0 | 2 | 0 | 0 | 0 | 0 |
| 4676<br>9 | [M]EPENDYMOBLASTOMA                                       | 0 | 0 | 0 | 0 | 0 | 0 | 0 | 0 | 0 | 0 | 0 | 0 | 0 | 2 | 0 | 0 | 0 | 0 |
| 4677<br>1 | [M]HEPATOCELLULAR CARCINOMA, FIBROLAMELLAR                | 0 | 0 | 0 | 0 | 0 | 0 | 0 | 0 | 0 | 0 | 0 | 0 | 0 | 2 | 0 | 0 | 0 | 0 |
| 4677<br>9 | [V]Personal history of malignant neoplasm of uterine body | 0 | 0 | 0 | 0 | 0 | 0 | 0 | 0 | 0 | 0 | 0 | 0 | 0 | 2 | 0 | 0 | 0 | 0 |
| 4678<br>9 | MALIGNANT NEOPLASM OF CHOROID PLEXUS                      | 0 | 0 | 0 | 0 | 0 | 0 | 0 | 0 | 0 | 0 | 0 | 0 | 0 | 2 | 0 | 0 | 0 | 0 |
| 4679<br>2 | Malignant neoplasm of temporal lobe                       | 0 | 0 | 0 | 0 | 0 | 0 | 0 | 0 | 0 | 0 | 0 | 0 | 0 | 2 | 0 | 0 | 0 | 0 |
| 4690<br>5 | Malignant neoplasm of coccygeal body                      | 0 | 0 | 0 | 0 | 0 | 0 | 0 | 0 | 0 | 0 | 0 | 0 | 0 | 2 | 0 | 0 | 0 | 0 |
| 4693<br>9 | Malignant neoplasm of cervical vertebra                   | 0 | 0 | 0 | 0 | 0 | 0 | 0 | 0 | 0 | 0 | 0 | 0 | 0 | 2 | 0 | 0 | 0 | 0 |
| 4709<br>4 | Malignant melanoma of eyebrow                             | 0 | 0 | 0 | 0 | 0 | 0 | 0 | 0 | 0 | 0 | 0 | 0 | 0 | 2 | 0 | 0 | 0 | 0 |
| 4720<br>5 | MALIGNANT OVERLAPPING LESION OF TONGUE                    | 0 | 0 | 0 | 0 | 0 | 0 | 0 | 0 | 0 | 0 | 0 | 0 | 0 | 2 | 0 | 0 | 0 | 0 |
| 4725<br>2 | Malignant melanoma of other and unspecified parts of face | 0 | 0 | 0 | 0 | 0 | 0 | 0 | 0 | 0 | 0 | 0 | 0 | 0 | 2 | 0 | 0 | 0 | 0 |
| 4728<br>6 | Malignant neoplasm of thorax                              | 0 | 0 | 0 | 0 | 0 | 0 | 0 | 0 | 0 | 0 | 0 | 0 | 0 | 2 | 0 | 0 | 0 | 0 |
| 4755<br>6 | Malignant neoplasm of temporal lobe NOS                   | 0 | 0 | 0 | 0 | 0 | 0 | 0 | 0 | 0 | 0 | 0 | 0 | 0 | 2 | 0 | 0 | 0 | 0 |
| 4763<br>3 | [X]Malig neopl, overlap lesion brain & other part of CNS  | 0 | 0 | 0 | 0 | 0 | 0 | 0 | 0 | 0 | 0 | 0 | 0 | 0 | 2 | 0 | 0 | 0 | 0 |
| 4766<br>8 | MALIGNANT NEOPLASM OF TUNICA VAGINALIS                    | 0 | 0 | 0 | 0 | 0 | 0 | 0 | 0 | 0 | 0 | 0 | 0 | 0 | 2 | 0 | 0 | 0 | 0 |

|           |                                                              |   |   |   |   |   |   |   |   |   |   |   |   |   |   |   |   |   |   |   |
|-----------|--------------------------------------------------------------|---|---|---|---|---|---|---|---|---|---|---|---|---|---|---|---|---|---|---|
| 4766<br>9 | [V]Personal history of malignant neoplasm of skin            | 0 | 0 | 0 | 0 | 0 | 0 | 0 | 0 | 0 | 0 | 0 | 0 | 0 | 2 | 0 | 0 | 0 | 0 | 0 |
| 4768<br>3 | [V]Personal history of malignant neoplasm of kidney          | 0 | 0 | 0 | 0 | 0 | 0 | 0 | 0 | 0 | 0 | 0 | 0 | 0 | 2 | 0 | 0 | 0 | 0 | 0 |
| 4773<br>4 | [M]Epithelioid mesothelioma, malignant                       | 0 | 0 | 0 | 0 | 0 | 0 | 0 | 0 | 0 | 0 | 0 | 0 | 0 | 2 | 0 | 0 | 0 | 0 | 0 |
| 4776<br>7 | MALIGNANT NEOPLASM OF SCROTUM                                | 0 | 0 | 0 | 0 | 0 | 0 | 0 | 0 | 0 | 0 | 0 | 0 | 0 | 2 | 0 | 0 | 0 | 0 | 0 |
| 4780<br>1 | Malignant neoplasm, overlapping lesion of bladder            | 0 | 0 | 0 | 0 | 0 | 0 | 0 | 0 | 0 | 0 | 0 | 0 | 0 | 2 | 0 | 0 | 0 | 0 | 0 |
| 4781<br>0 | MALIGNANT NEOPLASM OF UNSPECIFIED SITE                       | 0 | 0 | 0 | 0 | 0 | 0 | 0 | 0 | 0 | 0 | 0 | 0 | 0 | 2 | 0 | 0 | 0 | 0 | 0 |
| 4784<br>0 | Malignant neoplasm of aortic body                            | 0 | 0 | 0 | 0 | 0 | 0 | 0 | 0 | 0 | 0 | 0 | 0 | 0 | 2 | 0 | 0 | 0 | 0 | 0 |
| 4786<br>2 | MALIGNANT NEOPLASM OF THYROID CARTILAGE                      | 0 | 0 | 0 | 0 | 0 | 0 | 0 | 0 | 0 | 0 | 0 | 0 | 0 | 2 | 0 | 0 | 0 | 0 | 0 |
| 4789<br>9 | Malignant neoplasm of greater vestibular (Bartholin's) gland | 0 | 0 | 0 | 0 | 0 | 0 | 0 | 0 | 0 | 0 | 0 | 0 | 0 | 2 | 0 | 0 | 0 | 0 | 0 |
| 4792<br>0 | [M]C CELL CARCINOMA                                          | 0 | 0 | 0 | 0 | 0 | 0 | 0 | 0 | 0 | 0 | 0 | 0 | 0 | 2 | 0 | 0 | 0 | 0 | 0 |
| 4804<br>8 | [M]GIANT CELL AND SPINDLE CELL CARCINOMA                     | 0 | 0 | 0 | 0 | 0 | 0 | 0 | 0 | 0 | 0 | 0 | 0 | 0 | 2 | 0 | 0 | 0 | 0 | 0 |
| 4807<br>3 | MALIGNANT NEOPLASM OF BASAL GANGLIA                          | 0 | 0 | 0 | 0 | 0 | 0 | 0 | 0 | 0 | 0 | 0 | 0 | 0 | 2 | 0 | 0 | 0 | 0 | 0 |
| 4808<br>5 | [V]Personal history of malignant neoplasm of brain           | 0 | 0 | 0 | 0 | 0 | 0 | 0 | 0 | 0 | 0 | 0 | 0 | 0 | 2 | 0 | 0 | 0 | 0 | 0 |
| 4814<br>5 | ANAEMIA IN OVARIAN CARCINOMA                                 | 0 | 0 | 0 | 0 | 0 | 0 | 0 | 0 | 0 | 0 | 0 | 0 | 0 | 2 | 0 | 0 | 0 | 0 | 0 |
| 4822<br>3 | [M]Scirrhus adenocarcinoma                                   | 0 | 0 | 0 | 0 | 0 | 0 | 0 | 0 | 0 | 0 | 0 | 0 | 0 | 2 | 0 | 0 | 0 | 0 | 0 |
| 4823<br>1 | MALIGNANT NEOPLASM OF OTHER SPECIFIED SITES OF COLON         | 0 | 0 | 0 | 0 | 0 | 0 | 0 | 0 | 0 | 0 | 0 | 0 | 0 | 2 | 0 | 0 | 0 | 0 | 0 |
| 4823<br>7 | MALIGNANT NEOPLASM OF PREPYLORUS OF STOMACH                  | 0 | 0 | 0 | 0 | 0 | 0 | 0 | 0 | 0 | 0 | 0 | 0 | 0 | 2 | 0 | 0 | 0 | 0 | 0 |
| 4827<br>5 | [M]EMBRYONAL RHABDOMYOSARCOMA                                | 0 | 0 | 0 | 0 | 0 | 0 | 0 | 0 | 0 | 0 | 0 | 0 | 0 | 2 | 0 | 0 | 0 | 0 | 0 |
| 4834<br>8 | [M]PULMONARY BLASTOMA                                        | 0 | 0 | 0 | 0 | 0 | 0 | 0 | 0 | 0 | 0 | 0 | 0 | 0 | 2 | 0 | 0 | 0 | 0 | 0 |
| 4851<br>7 | MALIGNANT NEOPLASM OF SOFT TISSUE OF NECK                    | 0 | 0 | 0 | 0 | 0 | 0 | 0 | 0 | 0 | 0 | 0 | 0 | 0 | 2 | 0 | 0 | 0 | 0 | 0 |
| 4851<br>9 | MALIGNANT NEOPLASM OF JUNCTIONAL REGION OF EPIGLOTTIS        | 0 | 0 | 0 | 0 | 0 | 0 | 0 | 0 | 0 | 0 | 0 | 0 | 0 | 2 | 0 | 0 | 0 | 0 | 0 |
| 4853<br>7 | MALIGNANT NEOPLASM OF OTHER SPECIFIED SITES OF PANCREAS      | 0 | 0 | 0 | 0 | 0 | 0 | 0 | 0 | 0 | 0 | 0 | 0 | 0 | 2 | 0 | 0 | 0 | 0 | 0 |
| 4874<br>3 | Malignant neoplasm of body of penis                          | 0 | 0 | 0 | 0 | 0 | 0 | 0 | 0 | 0 | 0 | 0 | 0 | 0 | 2 | 0 | 0 | 0 | 0 | 0 |
| 4880<br>8 | [V]Personal history of malignant neoplasm of testis          | 0 | 0 | 0 | 0 | 0 | 0 | 0 | 0 | 0 | 0 | 0 | 0 | 0 | 2 | 0 | 0 | 0 | 0 | 0 |

|       |                                                               |   |   |   |   |   |   |   |   |   |   |   |   |   |   |   |   |   |   |   |
|-------|---------------------------------------------------------------|---|---|---|---|---|---|---|---|---|---|---|---|---|---|---|---|---|---|---|
| 48809 | MALIGNANT NEOPLASM OF MALE BREAST NOS                         | 0 | 0 | 0 | 0 | 0 | 0 | 0 | 0 | 0 | 0 | 0 | 0 | 0 | 2 | 0 | 0 | 0 | 0 | 0 |
| 48820 | MALIGNANT NEOPLASM OF ENDOCERVIX                              | 0 | 0 | 0 | 0 | 0 | 0 | 0 | 0 | 0 | 0 | 0 | 0 | 0 | 2 | 0 | 0 | 0 | 0 | 0 |
| 48952 | [M]Retinoblastoma NOS                                         | 0 | 0 | 0 | 0 | 0 | 0 | 0 | 0 | 0 | 0 | 0 | 0 | 0 | 2 | 0 | 0 | 0 | 0 | 0 |
| 49023 | [M]Endothelial bone sarcoma                                   | 0 | 0 | 0 | 0 | 0 | 0 | 0 | 0 | 0 | 0 | 0 | 0 | 0 | 2 | 0 | 0 | 0 | 0 | 0 |
| 49054 | MALIGNANT NEOPLASM OF SCAPULA                                 | 0 | 0 | 0 | 0 | 0 | 0 | 0 | 0 | 0 | 0 | 0 | 0 | 0 | 2 | 0 | 0 | 0 | 0 | 0 |
| 49132 | Malignant neoplasm of medulla oblongata                       | 0 | 0 | 0 | 0 | 0 | 0 | 0 | 0 | 0 | 0 | 0 | 0 | 0 | 2 | 0 | 0 | 0 | 0 | 0 |
| 49148 | Malignant neoplasm                                            | 0 | 0 | 0 | 0 | 0 | 0 | 0 | 0 | 0 | 0 | 0 | 0 | 0 | 2 | 0 | 0 | 0 | 0 | 0 |
| 49186 | [M]Oligodendroglioma, anaplastic type                         | 0 | 0 | 0 | 0 | 0 | 0 | 0 | 0 | 0 | 0 | 0 | 0 | 0 | 2 | 0 | 0 | 0 | 0 | 0 |
| 49289 | [V]Personal history of malign neop of trachea/bronchus/lung   | 0 | 0 | 0 | 0 | 0 | 0 | 0 | 0 | 0 | 0 | 0 | 0 | 0 | 2 | 0 | 0 | 0 | 0 | 0 |
| 49292 | [X]Malignant neoplasm/ill-defin sites within digestive system | 0 | 0 | 0 | 0 | 0 | 0 | 0 | 0 | 0 | 0 | 0 | 0 | 0 | 2 | 0 | 0 | 0 | 0 | 0 |
| 49360 | MALIGNANT NEOPLASM OF LOWER GUM                               | 0 | 0 | 0 | 0 | 0 | 0 | 0 | 0 | 0 | 0 | 0 | 0 | 0 | 2 | 0 | 0 | 0 | 0 | 0 |
| 49400 | MALIGNANT NEOPLASM OF ENDOMETRIUM                             | 0 | 0 | 0 | 0 | 0 | 0 | 0 | 0 | 0 | 0 | 0 | 0 | 0 | 2 | 0 | 0 | 0 | 0 | 0 |
| 49403 | MALIGNANT NEOPLASM OF SKIN OF CHIN                            | 0 | 0 | 0 | 0 | 0 | 0 | 0 | 0 | 0 | 0 | 0 | 0 | 0 | 2 | 0 | 0 | 0 | 0 | 0 |
| 49447 | [V]Personal history of malignant neoplasm of stomach          | 0 | 0 | 0 | 0 | 0 | 0 | 0 | 0 | 0 | 0 | 0 | 0 | 0 | 2 | 0 | 0 | 0 | 0 | 0 |
| 49463 | MALIGNANT NEOPLASM OF TARSUS OF EYELID                        | 0 | 0 | 0 | 0 | 0 | 0 | 0 | 0 | 0 | 0 | 0 | 0 | 0 | 2 | 0 | 0 | 0 | 0 | 0 |
| 49482 | Myopathy due to malignant disease                             | 0 | 0 | 0 | 0 | 0 | 0 | 0 | 0 | 0 | 0 | 0 | 0 | 0 | 2 | 0 | 0 | 0 | 0 | 0 |
| 49491 | MALIGNANT NEOPLASM OF STERNUM                                 | 0 | 0 | 0 | 0 | 0 | 0 | 0 | 0 | 0 | 0 | 0 | 0 | 0 | 2 | 0 | 0 | 0 | 0 | 0 |
| 49525 | Kaposi's sarcoma, unspecified                                 | 0 | 0 | 0 | 0 | 0 | 0 | 0 | 0 | 0 | 0 | 0 | 0 | 0 | 2 | 0 | 0 | 0 | 0 | 0 |
| 49629 | [M]GASTRINOMA, MALIGNANT                                      | 0 | 0 | 0 | 0 | 0 | 0 | 0 | 0 | 0 | 0 | 0 | 0 | 0 | 2 | 0 | 0 | 0 | 0 | 0 |
| 49701 | Malignant neoplasm of vertebral column NOS                    | 0 | 0 | 0 | 0 | 0 | 0 | 0 | 0 | 0 | 0 | 0 | 0 | 0 | 2 | 0 | 0 | 0 | 0 | 0 |
| 49714 | Malignant neoplasm of spinal meninges                         | 0 | 0 | 0 | 0 | 0 | 0 | 0 | 0 | 0 | 0 | 0 | 0 | 0 | 2 | 0 | 0 | 0 | 0 | 0 |
| 49758 | MALIGNANT NEOPLASM OF OTHER SITES LIP, ORAL CAVITY, PHARYNX   | 0 | 0 | 0 | 0 | 0 | 0 | 0 | 0 | 0 | 0 | 0 | 0 | 0 | 2 | 0 | 0 | 0 | 0 | 0 |
| 49811 | [M]MESODERMAL MIXED TUMOUR                                    | 0 | 0 | 0 | 0 | 0 | 0 | 0 | 0 | 0 | 0 | 0 | 0 | 0 | 2 | 0 | 0 | 0 | 0 | 0 |
| 49814 | Malignant melanoma of axilla                                  | 0 | 0 | 0 | 0 | 0 | 0 | 0 | 0 | 0 | 0 | 0 | 0 | 0 | 2 | 0 | 0 | 0 | 0 | 0 |



|           |                                                              |   |   |   |   |   |   |   |   |   |   |   |   |   |   |   |   |   |   |
|-----------|--------------------------------------------------------------|---|---|---|---|---|---|---|---|---|---|---|---|---|---|---|---|---|---|
| 4982<br>8 | Malignant neoplasm of fallopian tube                         | 0 | 0 | 0 | 0 | 0 | 0 | 0 | 0 | 0 | 0 | 0 | 0 | 2 | 0 | 0 | 0 | 0 | 0 |
| 4986<br>2 | [M]Osteoblastic sarcoma                                      | 0 | 0 | 0 | 0 | 0 | 0 | 0 | 0 | 0 | 0 | 0 | 0 | 2 | 0 | 0 | 0 | 0 | 0 |
| 4987<br>5 | Malignant neoplasm of meninges, unspecified                  | 0 | 0 | 0 | 0 | 0 | 0 | 0 | 0 | 0 | 0 | 0 | 0 | 2 | 0 | 0 | 0 | 0 | 0 |
| 4990<br>0 | [M]Klatskin's tumour                                         | 0 | 0 | 0 | 0 | 0 | 0 | 0 | 0 | 0 | 0 | 0 | 0 | 2 | 0 | 0 | 0 | 0 | 0 |
| 5003<br>5 | MALIGNANT NEOPLASM OF AORTIC BODY AND OTHER PARAGANGLIA      | 0 | 0 | 0 | 0 | 0 | 0 | 0 | 0 | 0 | 0 | 0 | 0 | 2 | 0 | 0 | 0 | 0 | 0 |
| 5014<br>0 | [M]Cribriform carcinoma                                      | 0 | 0 | 0 | 0 | 0 | 0 | 0 | 0 | 0 | 0 | 0 | 0 | 2 | 0 | 0 | 0 | 0 | 0 |
| 5015<br>1 | [M]Pineoblastoma                                             | 0 | 0 | 0 | 0 | 0 | 0 | 0 | 0 | 0 | 0 | 0 | 0 | 2 | 0 | 0 | 0 | 0 | 0 |
| 5015<br>2 | MALIGNANT SACRAL TERATOMA                                    | 0 | 0 | 0 | 0 | 0 | 0 | 0 | 0 | 0 | 0 | 0 | 0 | 2 | 0 | 0 | 0 | 0 | 0 |
| 5022<br>2 | Malignant neoplasm of connective and soft tissue of shoulder | 0 | 0 | 0 | 0 | 0 | 0 | 0 | 0 | 0 | 0 | 0 | 0 | 2 | 0 | 0 | 0 | 0 | 0 |
| 5023<br>5 | [M]ASTROBLASTOMA                                             | 0 | 0 | 0 | 0 | 0 | 0 | 0 | 0 | 0 | 0 | 0 | 0 | 2 | 0 | 0 | 0 | 0 | 0 |
| 5028<br>5 | MALIGNANT NEOPLASM OF ENDOCERVIX NOS                         | 0 | 0 | 0 | 0 | 0 | 0 | 0 | 0 | 0 | 0 | 0 | 0 | 2 | 0 | 0 | 0 | 0 | 0 |
| 5028<br>9 | MALIGNANT NEOPLASM OF HEART NOS                              | 0 | 0 | 0 | 0 | 0 | 0 | 0 | 0 | 0 | 0 | 0 | 0 | 2 | 0 | 0 | 0 | 0 | 0 |
| 5029<br>0 | KAPOSI'S SARCOMA OF LYMPH NODES                              | 0 | 0 | 0 | 0 | 0 | 0 | 0 | 0 | 0 | 0 | 0 | 0 | 2 | 0 | 0 | 0 | 0 | 0 |
| 5029<br>2 | [X]Malignant neoplasm of mediastinum                         | 0 | 0 | 0 | 0 | 0 | 0 | 0 | 0 | 0 | 0 | 0 | 0 | 2 | 0 | 0 | 0 | 0 | 0 |
| 5029<br>6 | MALIGNANT NEOPLASM OF UPPER LIP, LIPSTICK AREA               | 0 | 0 | 0 | 0 | 0 | 0 | 0 | 0 | 0 | 0 | 0 | 0 | 2 | 0 | 0 | 0 | 0 | 0 |
| 5029<br>7 | MALIGNANT NEOPLASM OF EXOCERVIX                              | 0 | 0 | 0 | 0 | 0 | 0 | 0 | 0 | 0 | 0 | 0 | 0 | 2 | 0 | 0 | 0 | 0 | 0 |
| 5029<br>8 | MALIGNANT NEOPLASM OF ORBITAL BONE                           | 0 | 0 | 0 | 0 | 0 | 0 | 0 | 0 | 0 | 0 | 0 | 0 | 2 | 0 | 0 | 0 | 0 | 0 |
| 5029<br>9 | MALIGNANT NEOPLASM OF ZYGOMATIC BONE                         | 0 | 0 | 0 | 0 | 0 | 0 | 0 | 0 | 0 | 0 | 0 | 0 | 2 | 0 | 0 | 0 | 0 | 0 |
| 5037<br>9 | [M]SYNOVIAL SARCOMA NOS                                      | 0 | 0 | 0 | 0 | 0 | 0 | 0 | 0 | 0 | 0 | 0 | 0 | 2 | 0 | 0 | 0 | 0 | 0 |
| 5040<br>2 | Malignant neoplasm of fibula                                 | 0 | 0 | 0 | 0 | 0 | 0 | 0 | 0 | 0 | 0 | 0 | 0 | 2 | 0 | 0 | 0 | 0 | 0 |
| 5047<br>5 | MALIGNANT NEOPLASM OF MAJOR SALIVARY GLAND NOS               | 0 | 0 | 0 | 0 | 0 | 0 | 0 | 0 | 0 | 0 | 0 | 0 | 2 | 0 | 0 | 0 | 0 | 0 |
| 5050<br>5 | Malignant melanoma of shoulder                               | 0 | 0 | 0 | 0 | 0 | 0 | 0 | 0 | 0 | 0 | 0 | 0 | 2 | 0 | 0 | 0 | 0 | 0 |
| 5057<br>9 | Malignant neoplasm, overlapping lesion of larynx             | 0 | 0 | 0 | 0 | 0 | 0 | 0 | 0 | 0 | 0 | 0 | 0 | 2 | 0 | 0 | 0 | 0 | 0 |
| 5060<br>5 | [M]GLOMANGIOSARCOMA                                          | 0 | 0 | 0 | 0 | 0 | 0 | 0 | 0 | 0 | 0 | 0 | 0 | 2 | 0 | 0 | 0 | 0 | 0 |

|           |                                                               |   |   |   |   |   |   |   |   |   |   |   |   |   |   |   |   |   |   |
|-----------|---------------------------------------------------------------|---|---|---|---|---|---|---|---|---|---|---|---|---|---|---|---|---|---|
| 5068<br>1 | MALIGNANT NEOPLASM OF PREPUCE (FORESKIN)                      | 0 | 0 | 0 | 0 | 0 | 0 | 0 | 0 | 0 | 0 | 0 | 0 | 2 | 0 | 0 | 0 | 0 | 0 |
| 5077<br>7 | MALIGNANT NEOPLASM, OVERLAP LESION PERIPH NERVE & AUTON NS    | 0 | 0 | 0 | 0 | 0 | 0 | 0 | 0 | 0 | 0 | 0 | 0 | 2 | 0 | 0 | 0 | 0 | 0 |
| 5078<br>9 | MALIGNANT NEOPLASM OF UPPER THIRD OF OESOPHAGUS               | 0 | 0 | 0 | 0 | 0 | 0 | 0 | 0 | 0 | 0 | 0 | 0 | 2 | 0 | 0 | 0 | 0 | 0 |
| 5085<br>9 | [M]Giant cell bone sarcoma                                    | 0 | 0 | 0 | 0 | 0 | 0 | 0 | 0 | 0 | 0 | 0 | 0 | 2 | 0 | 0 | 0 | 0 | 0 |
| 5089<br>8 | Malignant neoplasm of omentum                                 | 0 | 0 | 0 | 0 | 0 | 0 | 0 | 0 | 0 | 0 | 0 | 0 | 2 | 0 | 0 | 0 | 0 | 0 |
| 5094<br>6 | [M]MEDULLARY CARCINOMA WITH AMYLOID STROMA                    | 0 | 0 | 0 | 0 | 0 | 0 | 0 | 0 | 0 | 0 | 0 | 0 | 2 | 0 | 0 | 0 | 0 | 0 |
| 5097<br>4 | MALIGNANT NEOPLASM RECTUM, RECTOSIGMOID JUNCTION AND ANUS NOS | 0 | 0 | 0 | 0 | 0 | 0 | 0 | 0 | 0 | 0 | 0 | 0 | 2 | 0 | 0 | 0 | 0 | 0 |
| 5100<br>1 | [V]Personal history of malignant neoplasm of oesophagus       | 0 | 0 | 0 | 0 | 0 | 0 | 0 | 0 | 0 | 0 | 0 | 0 | 2 | 0 | 0 | 0 | 0 | 0 |
| 5111<br>5 | Malignant neoplasm of spinal cord                             | 0 | 0 | 0 | 0 | 0 | 0 | 0 | 0 | 0 | 0 | 0 | 0 | 2 | 0 | 0 | 0 | 0 | 0 |
| 5120<br>9 | MALIGNANT MELANOMA OF CHEST WALL                              | 0 | 0 | 0 | 0 | 0 | 0 | 0 | 0 | 0 | 0 | 0 | 0 | 2 | 0 | 0 | 0 | 0 | 0 |
| 5123<br>7 | Malignant neoplasm of rib                                     | 0 | 0 | 0 | 0 | 0 | 0 | 0 | 0 | 0 | 0 | 0 | 0 | 2 | 0 | 0 | 0 | 0 | 0 |
| 5125<br>5 | MALIGNANT NEOPLASM OF DIGESTIVE TRACT AND PERITONEUM NOS      | 0 | 0 | 0 | 0 | 0 | 0 | 0 | 0 | 0 | 0 | 0 | 0 | 2 | 0 | 0 | 0 | 0 | 0 |
| 5135<br>2 | Malignant neoplasms of independent (primary) multiple sites   | 0 | 0 | 0 | 0 | 0 | 0 | 0 | 0 | 0 | 0 | 0 | 0 | 2 | 0 | 0 | 0 | 0 | 0 |
| 5135<br>3 | [M]Malignant melanoma                                         | 0 | 0 | 0 | 0 | 0 | 0 | 0 | 0 | 0 | 0 | 0 | 0 | 2 | 0 | 0 | 0 | 0 | 0 |
| 5165<br>6 | [M]Mucinous cystadenocarcinoma NOS                            | 0 | 0 | 0 | 0 | 0 | 0 | 0 | 0 | 0 | 0 | 0 | 0 | 2 | 0 | 0 | 0 | 0 | 0 |
| 5169<br>0 | MALIGNANT NEOPLASM, OVERLAPPING LESION OF STOMACH             | 0 | 0 | 0 | 0 | 0 | 0 | 0 | 0 | 0 | 0 | 0 | 0 | 2 | 0 | 0 | 0 | 0 | 0 |
| 5178<br>6 | MALIGNANT NEOPLASM OF SUBMANDIBULAR GLAND                     | 0 | 0 | 0 | 0 | 0 | 0 | 0 | 0 | 0 | 0 | 0 | 0 | 2 | 0 | 0 | 0 | 0 | 0 |
| 5179<br>5 | Malignant neoplasm of glomus jugulare                         | 0 | 0 | 0 | 0 | 0 | 0 | 0 | 0 | 0 | 0 | 0 | 0 | 2 | 0 | 0 | 0 | 0 | 0 |
| 5181<br>8 | MALIGNANT NEOPLASM OF JAW NOS                                 | 0 | 0 | 0 | 0 | 0 | 0 | 0 | 0 | 0 | 0 | 0 | 0 | 2 | 0 | 0 | 0 | 0 | 0 |
| 5187<br>3 | Malignant melanoma of thigh                                   | 0 | 0 | 0 | 0 | 0 | 0 | 0 | 0 | 0 | 0 | 0 | 0 | 2 | 0 | 0 | 0 | 0 | 0 |
| 5187<br>8 | [M]AESTHESIONEUROBLASTOMA                                     | 0 | 0 | 0 | 0 | 0 | 0 | 0 | 0 | 0 | 0 | 0 | 0 | 2 | 0 | 0 | 0 | 0 | 0 |
| 5192<br>1 | MALIGNANT NEOPLASM OF PUBIS                                   | 0 | 0 | 0 | 0 | 0 | 0 | 0 | 0 | 0 | 0 | 0 | 0 | 2 | 0 | 0 | 0 | 0 | 0 |
| 5192<br>6 | MALIGNANT NEOPLASM OF FAUCIAL PILLAR                          | 0 | 0 | 0 | 0 | 0 | 0 | 0 | 0 | 0 | 0 | 0 | 0 | 2 | 0 | 0 | 0 | 0 | 0 |

|           |                                                             |   |   |   |   |   |   |   |   |   |   |   |   |   |   |   |   |   |   |   |
|-----------|-------------------------------------------------------------|---|---|---|---|---|---|---|---|---|---|---|---|---|---|---|---|---|---|---|
| 5196<br>5 | Malignant neoplasm of connective and soft tissue of pelvis  | 0 | 0 | 0 | 0 | 0 | 0 | 0 | 0 | 0 | 0 | 0 | 0 | 0 | 2 | 0 | 0 | 0 | 0 | 0 |
| 5202<br>9 | [X]Malignant neoplasm without specification of site         | 0 | 0 | 0 | 0 | 0 | 0 | 0 | 0 | 0 | 0 | 0 | 0 | 0 | 2 | 0 | 0 | 0 | 0 | 0 |
| 5214<br>1 | [V]Personal history of malignant neoplasm of ovary          | 0 | 0 | 0 | 0 | 0 | 0 | 0 | 0 | 0 | 0 | 0 | 0 | 0 | 2 | 0 | 0 | 0 | 0 | 0 |
| 5226<br>3 | [M]SEROUS CYSTADENOMA, BORDERLINE MALIGNANCY                | 0 | 0 | 0 | 0 | 0 | 0 | 0 | 0 | 0 | 0 | 0 | 0 | 0 | 2 | 0 | 0 | 0 | 0 | 0 |
| 5226<br>6 | [M]GRAWITZ TUMOUR                                           | 0 | 0 | 0 | 0 | 0 | 0 | 0 | 0 | 0 | 0 | 0 | 0 | 0 | 2 | 0 | 0 | 0 | 0 | 0 |
| 5231<br>6 | MALIGNANT NEOPLASM OF PELVIS                                | 0 | 0 | 0 | 0 | 0 | 0 | 0 | 0 | 0 | 0 | 0 | 0 | 0 | 2 | 0 | 0 | 0 | 0 | 0 |
| 5232<br>6 | [M]Adenocarcinoma in adenomatous polyp                      | 0 | 0 | 0 | 0 | 0 | 0 | 0 | 0 | 0 | 0 | 0 | 0 | 0 | 2 | 0 | 0 | 0 | 0 | 0 |
| 5249<br>3 | [M]TERATOBLASTOMA, MALIGNANT                                | 0 | 0 | 0 | 0 | 0 | 0 | 0 | 0 | 0 | 0 | 0 | 0 | 0 | 2 | 0 | 0 | 0 | 0 | 0 |
| 5251<br>1 | Malignant neoplasm of cerebral ventricles                   | 0 | 0 | 0 | 0 | 0 | 0 | 0 | 0 | 0 | 0 | 0 | 0 | 0 | 2 | 0 | 0 | 0 | 0 | 0 |
| 5253<br>7 | MALIGNANT NEOPLASM OF HEPATIC DUCT                          | 0 | 0 | 0 | 0 | 0 | 0 | 0 | 0 | 0 | 0 | 0 | 0 | 0 | 2 | 0 | 0 | 0 | 0 | 0 |
| 5257<br>0 | MALIGNANT NEOPLASM, OVERLAPPING LESION OF PENIS             | 0 | 0 | 0 | 0 | 0 | 0 | 0 | 0 | 0 | 0 | 0 | 0 | 0 | 2 | 0 | 0 | 0 | 0 | 0 |
| 5259<br>4 | MALIGNANT NEOPLASM OF GENITOURINARY ORGAN NOS               | 0 | 0 | 0 | 0 | 0 | 0 | 0 | 0 | 0 | 0 | 0 | 0 | 0 | 2 | 0 | 0 | 0 | 0 | 0 |
| 5268<br>4 | [M]Mesenchymal chondrosarcoma                               | 0 | 0 | 0 | 0 | 0 | 0 | 0 | 0 | 0 | 0 | 0 | 0 | 0 | 2 | 0 | 0 | 0 | 0 | 0 |
| 5275<br>1 | [M]EPENDYMOMA, ANAPLASTIC TYPE                              | 0 | 0 | 0 | 0 | 0 | 0 | 0 | 0 | 0 | 0 | 0 | 0 | 0 | 2 | 0 | 0 | 0 | 0 | 0 |
| 5310<br>3 | Malignant neoplasm of endocervical gland                    | 0 | 0 | 0 | 0 | 0 | 0 | 0 | 0 | 0 | 0 | 0 | 0 | 0 | 2 | 0 | 0 | 0 | 0 | 0 |
| 5312<br>9 | [M]Oncytic adenocarcinoma                                   | 0 | 0 | 0 | 0 | 0 | 0 | 0 | 0 | 0 | 0 | 0 | 0 | 0 | 2 | 0 | 0 | 0 | 0 | 0 |
| 5336<br>9 | MALIGNANT MELANOMA OF GREAT TOE                             | 0 | 0 | 0 | 0 | 0 | 0 | 0 | 0 | 0 | 0 | 0 | 0 | 0 | 2 | 0 | 0 | 0 | 0 | 0 |
| 5350<br>4 | MALIG NEOPL, OVERLAP LESION BRAIN & OTHER PART OF CNS       | 0 | 0 | 0 | 0 | 0 | 0 | 0 | 0 | 0 | 0 | 0 | 0 | 0 | 2 | 0 | 0 | 0 | 0 | 0 |
| 5351<br>5 | Malignant neoplasm skin of ear and external auricular canal | 0 | 0 | 0 | 0 | 0 | 0 | 0 | 0 | 0 | 0 | 0 | 0 | 0 | 2 | 0 | 0 | 0 | 0 | 0 |
| 5359<br>1 | MALIGNANT NEOPLASM OF OTHER SPECIFIED PART OF OESOPHAGUS    | 0 | 0 | 0 | 0 | 0 | 0 | 0 | 0 | 0 | 0 | 0 | 0 | 0 | 2 | 0 | 0 | 0 | 0 | 0 |
| 5359<br>4 | MALIGNANT NEOPLASM OF ETHMOID BONE                          | 0 | 0 | 0 | 0 | 0 | 0 | 0 | 0 | 0 | 0 | 0 | 0 | 0 | 2 | 0 | 0 | 0 | 0 | 0 |
| 5359<br>9 | MALIGNANT NEOPLASM OF FRONTAL BONE                          | 0 | 0 | 0 | 0 | 0 | 0 | 0 | 0 | 0 | 0 | 0 | 0 | 0 | 2 | 0 | 0 | 0 | 0 | 0 |
| 5362<br>9 | Malignant melanoma of buttock                               | 0 | 0 | 0 | 0 | 0 | 0 | 0 | 0 | 0 | 0 | 0 | 0 | 0 | 2 | 0 | 0 | 0 | 0 | 0 |
| 5388<br>4 | MALIGNANT NEOPLASM TONSIL NOS                               | 0 | 0 | 0 | 0 | 0 | 0 | 0 | 0 | 0 | 0 | 0 | 0 | 0 | 2 | 0 | 0 | 0 | 0 | 0 |

|      |   |                                                            |   |   |   |   |   |   |   |   |   |   |   |   |   |   |   |   |   |   |
|------|---|------------------------------------------------------------|---|---|---|---|---|---|---|---|---|---|---|---|---|---|---|---|---|---|
| 5391 | 0 | Malignant neoplasm of clitoris                             | 0 | 0 | 0 | 0 | 0 | 0 | 0 | 0 | 0 | 0 | 0 | 0 | 2 | 0 | 0 | 0 | 0 | 0 |
| 5398 | 9 | Malig neop connective and soft tissue upper limb/shoulder  | 0 | 0 | 0 | 0 | 0 | 0 | 0 | 0 | 0 | 0 | 0 | 0 | 2 | 0 | 0 | 0 | 0 | 0 |
| 5410 | 3 | Malignant neoplasm gallbladder and extrahepatic bile ducts | 0 | 0 | 0 | 0 | 0 | 0 | 0 | 0 | 0 | 0 | 0 | 0 | 2 | 0 | 0 | 0 | 0 | 0 |
| 5413 | 3 | Malignant neoplasm of cerebrum NOS                         | 0 | 0 | 0 | 0 | 0 | 0 | 0 | 0 | 0 | 0 | 0 | 0 | 2 | 0 | 0 | 0 | 0 | 0 |
| 5413 | 4 | Malignant neoplasm of middle lobe                          | 0 | 0 | 0 | 0 | 0 | 0 | 0 | 0 | 0 | 0 | 0 | 0 | 2 | 0 | 0 | 0 | 0 | 0 |
| 5417 | 1 | Malignant neoplasm of middle third of oesophagus           | 0 | 0 | 0 | 0 | 0 | 0 | 0 | 0 | 0 | 0 | 0 | 0 | 2 | 0 | 0 | 0 | 0 | 0 |
| 5418 | 4 | MALIGNANT NEOPLASM OF RENAL PELVIS NOS                     | 0 | 0 | 0 | 0 | 0 | 0 | 0 | 0 | 0 | 0 | 0 | 0 | 2 | 0 | 0 | 0 | 0 | 0 |
| 5418 | 6 | MALIGNANT NEOPLASM OF DIAPHRAGM                            | 0 | 0 | 0 | 0 | 0 | 0 | 0 | 0 | 0 | 0 | 0 | 0 | 2 | 0 | 0 | 0 | 0 | 0 |
| 5420 | 2 | Malignant neoplasm of other site of male breast            | 0 | 0 | 0 | 0 | 0 | 0 | 0 | 0 | 0 | 0 | 0 | 0 | 2 | 0 | 0 | 0 | 0 | 0 |
| 5422 | 2 | Malignant neoplasm of connective and soft tissue of foot   | 0 | 0 | 0 | 0 | 0 | 0 | 0 | 0 | 0 | 0 | 0 | 0 | 2 | 0 | 0 | 0 | 0 | 0 |
| 5423 | 4 | Malignant neoplasm of scalp and skin of neck               | 0 | 0 | 0 | 0 | 0 | 0 | 0 | 0 | 0 | 0 | 0 | 0 | 2 | 0 | 0 | 0 | 0 | 0 |
| 5426 | 7 | MALIGNANT NEOPLASM OF UNSPECIFIED SITE NOS                 | 0 | 0 | 0 | 0 | 0 | 0 | 0 | 0 | 0 | 0 | 0 | 0 | 2 | 0 | 0 | 0 | 0 | 0 |
| 5427 | 6 | [M]PSEUDOSARCOMATOUS CARCINOMA                             | 0 | 0 | 0 | 0 | 0 | 0 | 0 | 0 | 0 | 0 | 0 | 0 | 2 | 0 | 0 | 0 | 0 | 0 |
| 5428 | 4 | [M]NEUROEPITHELIOMATOUS NEOPLASMS                          | 0 | 0 | 0 | 0 | 0 | 0 | 0 | 0 | 0 | 0 | 0 | 0 | 2 | 0 | 0 | 0 | 0 | 0 |
| 5430 | 5 | MALIGNANT MELANOMA OF KNEE                                 | 0 | 0 | 0 | 0 | 0 | 0 | 0 | 0 | 0 | 0 | 0 | 0 | 2 | 0 | 0 | 0 | 0 | 0 |
| 5433 | 6 | Cancer hospital treatment completed                        | 0 | 0 | 0 | 0 | 0 | 0 | 0 | 0 | 0 | 0 | 0 | 0 | 2 | 0 | 0 | 0 | 0 | 0 |
| 5435 | 2 | MALIGNANT NEOPLASM OF SKIN OF HAND                         | 0 | 0 | 0 | 0 | 0 | 0 | 0 | 0 | 0 | 0 | 0 | 0 | 2 | 0 | 0 | 0 | 0 | 0 |
| 5449 | 3 | MALIGNANT NEOPLASM OF XIPHOID PROCESS                      | 0 | 0 | 0 | 0 | 0 | 0 | 0 | 0 | 0 | 0 | 0 | 0 | 2 | 0 | 0 | 0 | 0 | 0 |
| 5449 | 4 | MALIGNANT NEOPLASM OF NIPPLE AND AREOLA OF MALE BREAST     | 0 | 0 | 0 | 0 | 0 | 0 | 0 | 0 | 0 | 0 | 0 | 0 | 2 | 0 | 0 | 0 | 0 | 0 |
| 5461 | 3 | MALIGNANT NEOPLASM OF TYMPANIC ANTRUM                      | 0 | 0 | 0 | 0 | 0 | 0 | 0 | 0 | 0 | 0 | 0 | 0 | 2 | 0 | 0 | 0 | 0 | 0 |
| 5462 | 7 | [M]Choriocarcinoma combined with teratoma                  | 0 | 0 | 0 | 0 | 0 | 0 | 0 | 0 | 0 | 0 | 0 | 0 | 2 | 0 | 0 | 0 | 0 | 0 |
| 5463 | 1 | Malignant neoplasm of pelvic bones, sacrum and coccyx      | 0 | 0 | 0 | 0 | 0 | 0 | 0 | 0 | 0 | 0 | 0 | 0 | 2 | 0 | 0 | 0 | 0 | 0 |
| 5463 | 2 | MALIGNANT MELANOMA OF EYELID INCLUDING CANTHUS             | 0 | 0 | 0 | 0 | 0 | 0 | 0 | 0 | 0 | 0 | 0 | 0 | 2 | 0 | 0 | 0 | 0 | 0 |
| 5463 | 6 | MALIGNANT NEOPLASM OF ETHMOID SINUS                        | 0 | 0 | 0 | 0 | 0 | 0 | 0 | 0 | 0 | 0 | 0 | 0 | 2 | 0 | 0 | 0 | 0 | 0 |

|      |   |                                                              |   |   |   |   |   |   |   |   |   |   |   |   |   |   |   |   |   |
|------|---|--------------------------------------------------------------|---|---|---|---|---|---|---|---|---|---|---|---|---|---|---|---|---|
| 5468 | 5 | MALIGNANT MELANOMA OF UPPER ARM                              | 0 | 0 | 0 | 0 | 0 | 0 | 0 | 0 | 0 | 0 | 0 | 0 | 2 | 0 | 0 | 0 | 0 |
| 5469 | 1 | MALIGNANT NEOPLASM OF LUMBAR VERTEBRA                        | 0 | 0 | 0 | 0 | 0 | 0 | 0 | 0 | 0 | 0 | 0 | 0 | 2 | 0 | 0 | 0 | 0 |
| 5474 | 7 | MALIGNANT NEOPLASM OF PARIETAL BONE                          | 0 | 0 | 0 | 0 | 0 | 0 | 0 | 0 | 0 | 0 | 0 | 0 | 2 | 0 | 0 | 0 | 0 |
| 5474 | 9 | [M]PAPILLARY MUCINOUS CYSTADENOCARCINOMA                     | 0 | 0 | 0 | 0 | 0 | 0 | 0 | 0 | 0 | 0 | 0 | 0 | 2 | 0 | 0 | 0 | 0 |
| 5495 | 6 | MALIGNANT NEOPLASM OF EYE NOS                                | 0 | 0 | 0 | 0 | 0 | 0 | 0 | 0 | 0 | 0 | 0 | 0 | 2 | 0 | 0 | 0 | 0 |
| 5496 | 5 | MALIG NEOP CONNECTIVE AND SOFT TISSUE OF POPLITEAL SPACE     | 0 | 0 | 0 | 0 | 0 | 0 | 0 | 0 | 0 | 0 | 0 | 0 | 2 | 0 | 0 | 0 | 0 |
| 5501 | 5 | MALIGNANT NEOPLASM OF MOUTH NOS                              | 0 | 0 | 0 | 0 | 0 | 0 | 0 | 0 | 0 | 0 | 0 | 0 | 2 | 0 | 0 | 0 | 0 |
| 5501 | 9 | MALIGNANT NEOPLASM OF OTHER SPECIFIED SITE OF STOMACH        | 0 | 0 | 0 | 0 | 0 | 0 | 0 | 0 | 0 | 0 | 0 | 0 | 2 | 0 | 0 | 0 | 0 |
| 5506 | 6 | Malignant neoplasm of tonsillar pillar                       | 0 | 0 | 0 | 0 | 0 | 0 | 0 | 0 | 0 | 0 | 0 | 0 | 2 | 0 | 0 | 0 | 0 |
| 5509 | 8 | Malignant neoplasm of head NOS                               | 0 | 0 | 0 | 0 | 0 | 0 | 0 | 0 | 0 | 0 | 0 | 0 | 2 | 0 | 0 | 0 | 0 |
| 5510 | 1 | Malignant neoplasm of pelvis NOS                             | 0 | 0 | 0 | 0 | 0 | 0 | 0 | 0 | 0 | 0 | 0 | 0 | 2 | 0 | 0 | 0 | 0 |
| 5524 | 6 | MALIGNANT NEOPLASM OF ACCESSORY SINUS NOS                    | 0 | 0 | 0 | 0 | 0 | 0 | 0 | 0 | 0 | 0 | 0 | 0 | 2 | 0 | 0 | 0 | 0 |
| 5526 | 8 | [M]Myosarcoma                                                | 0 | 0 | 0 | 0 | 0 | 0 | 0 | 0 | 0 | 0 | 0 | 0 | 2 | 0 | 0 | 0 | 0 |
| 5529 | 2 | MALIGNANT MELANOMA OF UPPER LIMB OR SHOULDER NOS             | 0 | 0 | 0 | 0 | 0 | 0 | 0 | 0 | 0 | 0 | 0 | 0 | 2 | 0 | 0 | 0 | 0 |
| 5537 | 4 | MALIGNANT NEOPLASM OF EPIGLOTTIS NOS                         | 0 | 0 | 0 | 0 | 0 | 0 | 0 | 0 | 0 | 0 | 0 | 0 | 2 | 0 | 0 | 0 | 0 |
| 5542 | 9 | [M]MUCOID ADENOCARCINOMA                                     | 0 | 0 | 0 | 0 | 0 | 0 | 0 | 0 | 0 | 0 | 0 | 0 | 2 | 0 | 0 | 0 | 0 |
| 5543 | 4 | Malignant neoplasm of greater curve of stomach unspecified   | 0 | 0 | 0 | 0 | 0 | 0 | 0 | 0 | 0 | 0 | 0 | 0 | 2 | 0 | 0 | 0 | 0 |
| 5546 | 8 | [M]MUCOCARCINOID TUMOUR, MALIGNANT                           | 0 | 0 | 0 | 0 | 0 | 0 | 0 | 0 | 0 | 0 | 0 | 0 | 2 | 0 | 0 | 0 | 0 |
| 5555 | 0 | Malignant neoplasm of upper eyelid                           | 0 | 0 | 0 | 0 | 0 | 0 | 0 | 0 | 0 | 0 | 0 | 0 | 2 | 0 | 0 | 0 | 0 |
| 5558 | 8 | [X]MALIGNANT NEOPLASM OF FEMALE GENITAL ORGAN, UNSPECIFIED   | 0 | 0 | 0 | 0 | 0 | 0 | 0 | 0 | 0 | 0 | 0 | 0 | 2 | 0 | 0 | 0 | 0 |
| 5559 | 5 | Malignant neoplasm of sphenoid bone                          | 0 | 0 | 0 | 0 | 0 | 0 | 0 | 0 | 0 | 0 | 0 | 0 | 2 | 0 | 0 | 0 | 0 |
| 5563 | 0 | Malignant neoplasm of other specified site of nasopharynx    | 0 | 0 | 0 | 0 | 0 | 0 | 0 | 0 | 0 | 0 | 0 | 0 | 2 | 0 | 0 | 0 | 0 |
| 5565 | 8 | [M]ORCHIOBLASTOMA                                            | 0 | 0 | 0 | 0 | 0 | 0 | 0 | 0 | 0 | 0 | 0 | 0 | 2 | 0 | 0 | 0 | 0 |
| 5565 | 9 | Malig neop other site rectum, rectosigmoid junction and anus | 0 | 0 | 0 | 0 | 0 | 0 | 0 | 0 | 0 | 0 | 0 | 0 | 2 | 0 | 0 | 0 | 0 |

|           |                                                              |   |   |   |   |   |   |   |   |   |   |   |   |   |   |   |   |   |   |   |
|-----------|--------------------------------------------------------------|---|---|---|---|---|---|---|---|---|---|---|---|---|---|---|---|---|---|---|
| 5567<br>0 | MALIGNANT NEOPLASM OF SKIN OF EYEBROW                        | 0 | 0 | 0 | 0 | 0 | 0 | 0 | 0 | 0 | 0 | 0 | 0 | 0 | 2 | 0 | 0 | 0 | 0 | 0 |
| 5588<br>1 | Malignant melanoma of scalp                                  | 0 | 0 | 0 | 0 | 0 | 0 | 0 | 0 | 0 | 0 | 0 | 0 | 0 | 2 | 0 | 0 | 0 | 0 | 0 |
| 5594<br>7 | [M]PLEOMORPHIC LIPOSARCOMA                                   | 0 | 0 | 0 | 0 | 0 | 0 | 0 | 0 | 0 | 0 | 0 | 0 | 0 | 2 | 0 | 0 | 0 | 0 | 0 |
| 5595<br>3 | Malignant neoplasm of occipital bone                         | 0 | 0 | 0 | 0 | 0 | 0 | 0 | 0 | 0 | 0 | 0 | 0 | 0 | 2 | 0 | 0 | 0 | 0 | 0 |
| 5612<br>1 | [X]Malignant neoplasm of skin                                | 0 | 0 | 0 | 0 | 0 | 0 | 0 | 0 | 0 | 0 | 0 | 0 | 0 | 2 | 0 | 0 | 0 | 0 | 0 |
| 5635<br>5 | Malignant neoplasm of lateral wall of oropharynx             | 0 | 0 | 0 | 0 | 0 | 0 | 0 | 0 | 0 | 0 | 0 | 0 | 0 | 2 | 0 | 0 | 0 | 0 | 0 |
| 5649<br>0 | Malignant neoplasm of nervous system NOS                     | 0 | 0 | 0 | 0 | 0 | 0 | 0 | 0 | 0 | 0 | 0 | 0 | 0 | 2 | 0 | 0 | 0 | 0 | 0 |
| 5651<br>3 | MALIGNANT NEOPLASM OF FEMUR                                  | 0 | 0 | 0 | 0 | 0 | 0 | 0 | 0 | 0 | 0 | 0 | 0 | 0 | 2 | 0 | 0 | 0 | 0 | 0 |
| 5660<br>0 | [M]Epidermoid carcinoma NOS                                  | 0 | 0 | 0 | 0 | 0 | 0 | 0 | 0 | 0 | 0 | 0 | 0 | 0 | 2 | 0 | 0 | 0 | 0 | 0 |
| 5667<br>6 | [M]Myxoid liposarcoma                                        | 0 | 0 | 0 | 0 | 0 | 0 | 0 | 0 | 0 | 0 | 0 | 0 | 0 | 2 | 0 | 0 | 0 | 0 | 0 |
| 5670<br>9 | MALIGNANT NEOPLASM OF OTHER SITES OF FLOOR OF MOUTH          | 0 | 0 | 0 | 0 | 0 | 0 | 0 | 0 | 0 | 0 | 0 | 0 | 0 | 2 | 0 | 0 | 0 | 0 | 0 |
| 5671<br>5 | Malignant neoplasm of other site of female breast            | 0 | 0 | 0 | 0 | 0 | 0 | 0 | 0 | 0 | 0 | 0 | 0 | 0 | 2 | 0 | 0 | 0 | 0 | 0 |
| 5671<br>8 | Malignant neoplasm of eyeball NOS                            | 0 | 0 | 0 | 0 | 0 | 0 | 0 | 0 | 0 | 0 | 0 | 0 | 0 | 2 | 0 | 0 | 0 | 0 | 0 |
| 5679<br>4 | [M]Adenocarcinoid tumour                                     | 0 | 0 | 0 | 0 | 0 | 0 | 0 | 0 | 0 | 0 | 0 | 0 | 0 | 2 | 0 | 0 | 0 | 0 | 0 |
| 5691<br>8 | MALIGNANT NEOPLASM OTHER SPEC DIGESTIVE TRACT AND PERITONEUM | 0 | 0 | 0 | 0 | 0 | 0 | 0 | 0 | 0 | 0 | 0 | 0 | 0 | 2 | 0 | 0 | 0 | 0 | 0 |
| 5692<br>5 | [X]Malignant melanoma of other+unspecified parts of face     | 0 | 0 | 0 | 0 | 0 | 0 | 0 | 0 | 0 | 0 | 0 | 0 | 0 | 2 | 0 | 0 | 0 | 0 | 0 |
| 5695<br>4 | Malignant neoplasm of skin of knee                           | 0 | 0 | 0 | 0 | 0 | 0 | 0 | 0 | 0 | 0 | 0 | 0 | 0 | 2 | 0 | 0 | 0 | 0 | 0 |
| 5704<br>7 | Malignant neoplasm of carotid body                           | 0 | 0 | 0 | 0 | 0 | 0 | 0 | 0 | 0 | 0 | 0 | 0 | 0 | 2 | 0 | 0 | 0 | 0 | 0 |
| 5708<br>4 | [M]SEMINOMA, ANAPLASTIC TYPE                                 | 0 | 0 | 0 | 0 | 0 | 0 | 0 | 0 | 0 | 0 | 0 | 0 | 0 | 2 | 0 | 0 | 0 | 0 | 0 |
| 5708<br>7 | [M]EMBRYONAL TERATOMA                                        | 0 | 0 | 0 | 0 | 0 | 0 | 0 | 0 | 0 | 0 | 0 | 0 | 0 | 2 | 0 | 0 | 0 | 0 | 0 |
| 5718<br>4 | [X]Oth malignant neoplasm/skin of oth+unspecfd parts of face | 0 | 0 | 0 | 0 | 0 | 0 | 0 | 0 | 0 | 0 | 0 | 0 | 0 | 2 | 0 | 0 | 0 | 0 | 0 |
| 5719<br>1 | [X]Malignant neoplasm/other specified male genital organs    | 0 | 0 | 0 | 0 | 0 | 0 | 0 | 0 | 0 | 0 | 0 | 0 | 0 | 2 | 0 | 0 | 0 | 0 | 0 |
| 5723<br>5 | Malignant neoplasm of endocervical canal                     | 0 | 0 | 0 | 0 | 0 | 0 | 0 | 0 | 0 | 0 | 0 | 0 | 0 | 2 | 0 | 0 | 0 | 0 | 0 |
| 5724<br>8 | Malignant neoplasm aryepiglottic fold, hypopharyngeal aspect | 0 | 0 | 0 | 0 | 0 | 0 | 0 | 0 | 0 | 0 | 0 | 0 | 0 | 2 | 0 | 0 | 0 | 0 | 0 |

|           |                                                              |   |   |   |   |   |   |   |   |   |   |   |   |   |   |   |   |   |   |   |
|-----------|--------------------------------------------------------------|---|---|---|---|---|---|---|---|---|---|---|---|---|---|---|---|---|---|---|
| 5726<br>0 | MALIGNANT MELANOMA OF EAR AND EXTERNAL AURICULAR CANAL       | 0 | 0 | 0 | 0 | 0 | 0 | 0 | 0 | 0 | 0 | 0 | 0 | 0 | 2 | 0 | 0 | 0 | 0 | 0 |
| 5733<br>6 | [M]Epithelioma, malignant                                    | 0 | 0 | 0 | 0 | 0 | 0 | 0 | 0 | 0 | 0 | 0 | 0 | 0 | 2 | 0 | 0 | 0 | 0 | 0 |
| 5744<br>2 | Malignant neoplasm of skin of lower limb and hip             | 0 | 0 | 0 | 0 | 0 | 0 | 0 | 0 | 0 | 0 | 0 | 0 | 0 | 2 | 0 | 0 | 0 | 0 | 0 |
| 5744<br>6 | MALIGNANT NEOPLASM OF SKIN OF TRUNK, EXCLUDING SCROTUM       | 0 | 0 | 0 | 0 | 0 | 0 | 0 | 0 | 0 | 0 | 0 | 0 | 0 | 2 | 0 | 0 | 0 | 0 | 0 |
| 5747<br>1 | MALIG NEOP OF CONNECTIVE AND SOFT TISSUE TRUNK UNSPECIFIED   | 0 | 0 | 0 | 0 | 0 | 0 | 0 | 0 | 0 | 0 | 0 | 0 | 0 | 2 | 0 | 0 | 0 | 0 | 0 |
| 5748<br>2 | Malignant neoplasm of connective and soft tissue of fore-arm | 0 | 0 | 0 | 0 | 0 | 0 | 0 | 0 | 0 | 0 | 0 | 0 | 0 | 2 | 0 | 0 | 0 | 0 | 0 |
| 5750<br>5 | [M]Pleomorphic rhabdomyosarcoma                              | 0 | 0 | 0 | 0 | 0 | 0 | 0 | 0 | 0 | 0 | 0 | 0 | 0 | 2 | 0 | 0 | 0 | 0 | 0 |
| 5751<br>3 | [M]Epidermoid carcinoma                                      | 0 | 0 | 0 | 0 | 0 | 0 | 0 | 0 | 0 | 0 | 0 | 0 | 0 | 2 | 0 | 0 | 0 | 0 | 0 |
| 5755<br>1 | MYASTHENIC SYNDROME DUE TO OTHER MALIGNANCY                  | 0 | 0 | 0 | 0 | 0 | 0 | 0 | 0 | 0 | 0 | 0 | 0 | 0 | 2 | 0 | 0 | 0 | 0 | 0 |
| 5767<br>7 | [M]HEPATOBLASTOMA                                            | 0 | 0 | 0 | 0 | 0 | 0 | 0 | 0 | 0 | 0 | 0 | 0 | 0 | 2 | 0 | 0 | 0 | 0 | 0 |
| 5768<br>0 | [M]Spinous cell carcinoma                                    | 0 | 0 | 0 | 0 | 0 | 0 | 0 | 0 | 0 | 0 | 0 | 0 | 0 | 2 | 0 | 0 | 0 | 0 | 0 |
| 5771<br>9 | MALIGNANT NEOPLASM OF SQUAMOCOLUMNAR JUNCTION OF CERVIX      | 0 | 0 | 0 | 0 | 0 | 0 | 0 | 0 | 0 | 0 | 0 | 0 | 0 | 2 | 0 | 0 | 0 | 0 | 0 |
| 5772<br>7 | [V]Personal history of malignant neoplasm of large intestine | 0 | 0 | 0 | 0 | 0 | 0 | 0 | 0 | 0 | 0 | 0 | 0 | 0 | 2 | 0 | 0 | 0 | 0 | 0 |
| 5772<br>9 | [M]Lymphangiosarcoma                                         | 0 | 0 | 0 | 0 | 0 | 0 | 0 | 0 | 0 | 0 | 0 | 0 | 0 | 2 | 0 | 0 | 0 | 0 | 0 |
| 5775<br>6 | [X]Malignant neoplasm/other specified female genital organs  | 0 | 0 | 0 | 0 | 0 | 0 | 0 | 0 | 0 | 0 | 0 | 0 | 0 | 2 | 0 | 0 | 0 | 0 | 0 |
| 5779<br>6 | [M]SYNOVIAL SARCOMA, BIPHASIC TYPE                           | 0 | 0 | 0 | 0 | 0 | 0 | 0 | 0 | 0 | 0 | 0 | 0 | 0 | 2 | 0 | 0 | 0 | 0 | 0 |
| 5780<br>2 | [M]ALVEOLAR ADENOCARCINOMA                                   | 0 | 0 | 0 | 0 | 0 | 0 | 0 | 0 | 0 | 0 | 0 | 0 | 0 | 2 | 0 | 0 | 0 | 0 | 0 |
| 5785<br>4 | Malignant neoplasm of inguinal region NOS                    | 0 | 0 | 0 | 0 | 0 | 0 | 0 | 0 | 0 | 0 | 0 | 0 | 0 | 2 | 0 | 0 | 0 | 0 | 0 |
| 5798<br>8 | Malignant neoplasm of carpal bone - scaphoid                 | 0 | 0 | 0 | 0 | 0 | 0 | 0 | 0 | 0 | 0 | 0 | 0 | 0 | 2 | 0 | 0 | 0 | 0 | 0 |
| 5806<br>1 | MALIGNANT NEOPLASM OF LABIA MINORA                           | 0 | 0 | 0 | 0 | 0 | 0 | 0 | 0 | 0 | 0 | 0 | 0 | 0 | 2 | 0 | 0 | 0 | 0 | 0 |
| 5808<br>8 | MALIGNANT NEOPLASM OF INTRAHEPATIC GALL DUCT                 | 0 | 0 | 0 | 0 | 0 | 0 | 0 | 0 | 0 | 0 | 0 | 0 | 0 | 2 | 0 | 0 | 0 | 0 | 0 |
| 5809<br>4 | MALIGNANT NEOPLASM, OVERLAPPING LESION OF CERVIX UTERI       | 0 | 0 | 0 | 0 | 0 | 0 | 0 | 0 | 0 | 0 | 0 | 0 | 0 | 2 | 0 | 0 | 0 | 0 | 0 |
| 5812<br>1 | Malignant neoplasm of anterior 2/3 of tongue unspecified     | 0 | 0 | 0 | 0 | 0 | 0 | 0 | 0 | 0 | 0 | 0 | 0 | 0 | 2 | 0 | 0 | 0 | 0 | 0 |
| 5813<br>1 | [M]COMEDOCARCINOMA NOS                                       | 0 | 0 | 0 | 0 | 0 | 0 | 0 | 0 | 0 | 0 | 0 | 0 | 0 | 2 | 0 | 0 | 0 | 0 | 0 |

|           |                                                                 |   |   |   |   |   |   |   |   |   |   |   |   |   |   |   |   |   |   |   |
|-----------|-----------------------------------------------------------------|---|---|---|---|---|---|---|---|---|---|---|---|---|---|---|---|---|---|---|
| 5816<br>7 | UNDER CARE CANCER PRIMARY HEALTHCARE<br>MULTIDISCIPLINARY TEAM  | 0 | 0 | 0 | 0 | 0 | 0 | 0 | 0 | 0 | 0 | 0 | 0 | 0 | 2 | 0 | 0 | 0 | 0 | 0 |
| 5817<br>7 | [V]Personal history of malignant neoplasm of<br>liver           | 0 | 0 | 0 | 0 | 0 | 0 | 0 | 0 | 0 | 0 | 0 | 0 | 0 | 2 | 0 | 0 | 0 | 0 | 0 |
| 5860<br>1 | Malignant neoplasm of skin of thigh                             | 0 | 0 | 0 | 0 | 0 | 0 | 0 | 0 | 0 | 0 | 0 | 0 | 0 | 2 | 0 | 0 | 0 | 0 | 0 |
| 5879<br>8 | [M]TRANSITIONAL CELL CARCINOMA, SPINDLE<br>CELL TYPE            | 0 | 0 | 0 | 0 | 0 | 0 | 0 | 0 | 0 | 0 | 0 | 0 | 0 | 2 | 0 | 0 | 0 | 0 | 0 |
| 5883<br>5 | [M]Desmoplastic melanoma                                        | 0 | 0 | 0 | 0 | 0 | 0 | 0 | 0 | 0 | 0 | 0 | 0 | 0 | 2 | 0 | 0 | 0 | 0 | 0 |
| 5883<br>6 | Malig neop of connective and soft tissue of<br>pelvis NOS       | 0 | 0 | 0 | 0 | 0 | 0 | 0 | 0 | 0 | 0 | 0 | 0 | 0 | 2 | 0 | 0 | 0 | 0 | 0 |
| 5883<br>7 | [M]SMALL CELL SARCOMA                                           | 0 | 0 | 0 | 0 | 0 | 0 | 0 | 0 | 0 | 0 | 0 | 0 | 0 | 2 | 0 | 0 | 0 | 0 | 0 |
| 5890<br>2 | [M]Olfactory neurogenic tumour                                  | 0 | 0 | 0 | 0 | 0 | 0 | 0 | 0 | 0 | 0 | 0 | 0 | 0 | 2 | 0 | 0 | 0 | 0 | 0 |
| 5890<br>3 | Malignant neoplasm of head                                      | 0 | 0 | 0 | 0 | 0 | 0 | 0 | 0 | 0 | 0 | 0 | 0 | 0 | 2 | 0 | 0 | 0 | 0 | 0 |
| 5894<br>9 | MALIGNANT NEOPLASM OF PHALANGES OF<br>FOOT                      | 0 | 0 | 0 | 0 | 0 | 0 | 0 | 0 | 0 | 0 | 0 | 0 | 0 | 2 | 0 | 0 | 0 | 0 | 0 |
| 5895<br>8 | Malignant melanoma of temple                                    | 0 | 0 | 0 | 0 | 0 | 0 | 0 | 0 | 0 | 0 | 0 | 0 | 0 | 2 | 0 | 0 | 0 | 0 | 0 |
| 5897<br>3 | [X]MALIGNANT NEOPLASM OF LIP, ORAL<br>CAVITY AND PHARYNX        | 0 | 0 | 0 | 0 | 0 | 0 | 0 | 0 | 0 | 0 | 0 | 0 | 0 | 2 | 0 | 0 | 0 | 0 | 0 |
| 5900<br>4 | Malignant neoplasm of lateral wall of<br>nasopharynx            | 0 | 0 | 0 | 0 | 0 | 0 | 0 | 0 | 0 | 0 | 0 | 0 | 0 | 2 | 0 | 0 | 0 | 0 | 0 |
| 5903<br>6 | MALIGNANT NEOPLASM OF BONES OF SKULL<br>AND FACE                | 0 | 0 | 0 | 0 | 0 | 0 | 0 | 0 | 0 | 0 | 0 | 0 | 0 | 2 | 0 | 0 | 0 | 0 | 0 |
| 5904<br>1 | MALIGNANT NEOPLASM OF CILIARY BODY                              | 0 | 0 | 0 | 0 | 0 | 0 | 0 | 0 | 0 | 0 | 0 | 0 | 0 | 2 | 0 | 0 | 0 | 0 | 0 |
| 5906<br>1 | Malignant melanoma of auricle (ear)                             | 0 | 0 | 0 | 0 | 0 | 0 | 0 | 0 | 0 | 0 | 0 | 0 | 0 | 2 | 0 | 0 | 0 | 0 | 0 |
| 5907<br>6 | SPUTUM: MALIGNANT CELLS                                         | 0 | 0 | 0 | 0 | 0 | 0 | 0 | 0 | 0 | 0 | 0 | 0 | 0 | 2 | 0 | 0 | 0 | 0 | 0 |
| 5909<br>2 | MALIGNANT NEOPLASM OF PYLORUS OF<br>STOMACH NOS                 | 0 | 0 | 0 | 0 | 0 | 0 | 0 | 0 | 0 | 0 | 0 | 0 | 0 | 2 | 0 | 0 | 0 | 0 | 0 |
| 5909<br>7 | Malignant neoplasm of lower uterine segment                     | 0 | 0 | 0 | 0 | 0 | 0 | 0 | 0 | 0 | 0 | 0 | 0 | 0 | 2 | 0 | 0 | 0 | 0 | 0 |
| 5914<br>3 | [M]SQUAMOUS CELL CARCINOMA, LARGE<br>CELL, NON-KERATINISING     | 0 | 0 | 0 | 0 | 0 | 0 | 0 | 0 | 0 | 0 | 0 | 0 | 0 | 2 | 0 | 0 | 0 | 0 | 0 |
| 5915<br>2 | Malignant neoplasm of connective and soft<br>tissue of perineum | 0 | 0 | 0 | 0 | 0 | 0 | 0 | 0 | 0 | 0 | 0 | 0 | 0 | 2 | 0 | 0 | 0 | 0 | 0 |
| 5917<br>0 | Malignant neoplasm of corpus callosum                           | 0 | 0 | 0 | 0 | 0 | 0 | 0 | 0 | 0 | 0 | 0 | 0 | 0 | 2 | 0 | 0 | 0 | 0 | 0 |
| 5922<br>3 | MALIGNANT NEOPLASM OF ISCHIUM                                   | 0 | 0 | 0 | 0 | 0 | 0 | 0 | 0 | 0 | 0 | 0 | 0 | 0 | 2 | 0 | 0 | 0 | 0 | 0 |
| 5924<br>0 | [M]CARCINOMA, DIFFUSE TYPE                                      | 0 | 0 | 0 | 0 | 0 | 0 | 0 | 0 | 0 | 0 | 0 | 0 | 0 | 2 | 0 | 0 | 0 | 0 | 0 |



|      |   |                                                              |   |   |   |   |   |   |   |   |   |   |   |   |   |   |   |   |   |   |
|------|---|--------------------------------------------------------------|---|---|---|---|---|---|---|---|---|---|---|---|---|---|---|---|---|---|
| 5925 | 1 | [M]Cystosarcoma phyllodes, malignant                         | 0 | 0 | 0 | 0 | 0 | 0 | 0 | 0 | 0 | 0 | 0 | 0 | 2 | 0 | 0 | 0 | 0 | 0 |
| 5928 | 4 | [M]MUCOUS ADENOCARCINOMA                                     | 0 | 0 | 0 | 0 | 0 | 0 | 0 | 0 | 0 | 0 | 0 | 0 | 2 | 0 | 0 | 0 | 0 | 0 |
| 5928 | 6 | Malignant neoplasm of overlapping lesion of urinary organs   | 0 | 0 | 0 | 0 | 0 | 0 | 0 | 0 | 0 | 0 | 0 | 0 | 2 | 0 | 0 | 0 | 0 | 0 |
| 5931 | 0 | [M]Osteochondrosarcoma                                       | 0 | 0 | 0 | 0 | 0 | 0 | 0 | 0 | 0 | 0 | 0 | 0 | 2 | 0 | 0 | 0 | 0 | 0 |
| 5936 | 2 | MALIGNANT NEOPLASM OF LABIA MAJORA NOS                       | 0 | 0 | 0 | 0 | 0 | 0 | 0 | 0 | 0 | 0 | 0 | 0 | 2 | 0 | 0 | 0 | 0 | 0 |
| 5938 | 1 | MALIGNANT NEOPLASM OF IRIS                                   | 0 | 0 | 0 | 0 | 0 | 0 | 0 | 0 | 0 | 0 | 0 | 0 | 2 | 0 | 0 | 0 | 0 | 0 |
| 5938 | 2 | MALIGNANT NEOPLASM OF SOFT TISSUE OF HEAD                    | 0 | 0 | 0 | 0 | 0 | 0 | 0 | 0 | 0 | 0 | 0 | 0 | 2 | 0 | 0 | 0 | 0 | 0 |
| 5938 | 8 | Malignant neoplasm of mesocaecum                             | 0 | 0 | 0 | 0 | 0 | 0 | 0 | 0 | 0 | 0 | 0 | 0 | 2 | 0 | 0 | 0 | 0 | 0 |
| 5941 | 5 | [M]Thymoma, malignant                                        | 0 | 0 | 0 | 0 | 0 | 0 | 0 | 0 | 0 | 0 | 0 | 0 | 2 | 0 | 0 | 0 | 0 | 0 |
| 5952 | 0 | MALIGNANT NEOPLASM OF MALAR BONE                             | 0 | 0 | 0 | 0 | 0 | 0 | 0 | 0 | 0 | 0 | 0 | 0 | 2 | 0 | 0 | 0 | 0 | 0 |
| 5965 | 1 | [M]MIXED TYPE LIPOSARCOMA                                    | 0 | 0 | 0 | 0 | 0 | 0 | 0 | 0 | 0 | 0 | 0 | 0 | 2 | 0 | 0 | 0 | 0 | 0 |
| 5971 | 8 | MALIG NEOP PITUITARY GLAND OR CRANIOPHARYNGEAL DUCT NOS      | 0 | 0 | 0 | 0 | 0 | 0 | 0 | 0 | 0 | 0 | 0 | 0 | 2 | 0 | 0 | 0 | 0 | 0 |
| 5982 | 3 | Malignant neoplasm pituitary gland and craniopharyngeal duct | 0 | 0 | 0 | 0 | 0 | 0 | 0 | 0 | 0 | 0 | 0 | 0 | 2 | 0 | 0 | 0 | 0 | 0 |
| 5983 | 1 | Malignant neoplasm of nipple or areola of female breast NOS  | 0 | 0 | 0 | 0 | 0 | 0 | 0 | 0 | 0 | 0 | 0 | 0 | 2 | 0 | 0 | 0 | 0 | 0 |
| 5991 | 8 | [M]Follicular adenocarcinoma, well differentiated type       | 0 | 0 | 0 | 0 | 0 | 0 | 0 | 0 | 0 | 0 | 0 | 0 | 2 | 0 | 0 | 0 | 0 | 0 |
| 5991 | 9 | [M]Multicentric basal cell carcinoma                         | 0 | 0 | 0 | 0 | 0 | 0 | 0 | 0 | 0 | 0 | 0 | 0 | 2 | 0 | 0 | 0 | 0 | 0 |
| 6003 | 5 | Malignant neoplasm of cartilage of ear                       | 0 | 0 | 0 | 0 | 0 | 0 | 0 | 0 | 0 | 0 | 0 | 0 | 2 | 0 | 0 | 0 | 0 | 0 |
| 6004 | 5 | [M]Tubular adenocarcinoma                                    | 0 | 0 | 0 | 0 | 0 | 0 | 0 | 0 | 0 | 0 | 0 | 0 | 2 | 0 | 0 | 0 | 0 | 0 |
| 6005 | 2 | Malignant neoplasm of specified site NOS                     | 0 | 0 | 0 | 0 | 0 | 0 | 0 | 0 | 0 | 0 | 0 | 0 | 2 | 0 | 0 | 0 | 0 | 0 |
| 6012 | 7 | [M]MYXOLIPOSARCOMA                                           | 0 | 0 | 0 | 0 | 0 | 0 | 0 | 0 | 0 | 0 | 0 | 0 | 2 | 0 | 0 | 0 | 0 | 0 |
| 6016 | 2 | [X]Malignant neoplasm overlapping lesion of skin             | 0 | 0 | 0 | 0 | 0 | 0 | 0 | 0 | 0 | 0 | 0 | 0 | 2 | 0 | 0 | 0 | 0 | 0 |
| 6024 | 7 | MALIG NEOP OF CONNECTIVE AND SOFT TISSUE OF ABDOMEN NOS      | 0 | 0 | 0 | 0 | 0 | 0 | 0 | 0 | 0 | 0 | 0 | 0 | 2 | 0 | 0 | 0 | 0 | 0 |
| 6031 | 2 | Malignant neoplasm other gallbladder/extrahepatic bile duct  | 0 | 0 | 0 | 0 | 0 | 0 | 0 | 0 | 0 | 0 | 0 | 0 | 2 | 0 | 0 | 0 | 0 | 0 |
| 6034 | 7 | [M]LEPTOMENINGEAL SARCOMA                                    | 0 | 0 | 0 | 0 | 0 | 0 | 0 | 0 | 0 | 0 | 0 | 0 | 2 | 0 | 0 | 0 | 0 | 0 |

|           |                                                                |   |   |   |   |   |   |   |   |   |   |   |   |   |   |   |   |   |   |
|-----------|----------------------------------------------------------------|---|---|---|---|---|---|---|---|---|---|---|---|---|---|---|---|---|---|
| 6040<br>3 | MALIGNANT NEOPLASM OF COSTAL<br>CARTILAGE                      | 0 | 0 | 0 | 0 | 0 | 0 | 0 | 0 | 0 | 0 | 0 | 0 | 2 | 0 | 0 | 0 | 0 | 0 |
| 6052<br>6 | MALIGNANT NEOPLASM OF SKIN OF UPPER<br>LIMB OR SHOULDER NOS    | 0 | 0 | 0 | 0 | 0 | 0 | 0 | 0 | 0 | 0 | 0 | 0 | 2 | 0 | 0 | 0 | 0 | 0 |
| 6063<br>1 | [M]Osteosarcoma in Paget's disease of bone                     | 0 | 0 | 0 | 0 | 0 | 0 | 0 | 0 | 0 | 0 | 0 | 0 | 2 | 0 | 0 | 0 | 0 | 0 |
| 6075<br>6 | [M]CYLINDROID BRONCHIAL ADENOMA                                | 0 | 0 | 0 | 0 | 0 | 0 | 0 | 0 | 0 | 0 | 0 | 0 | 2 | 0 | 0 | 0 | 0 | 0 |
| 6077<br>2 | Malignant neoplasm of vagina NOS                               | 0 | 0 | 0 | 0 | 0 | 0 | 0 | 0 | 0 | 0 | 0 | 0 | 2 | 0 | 0 | 0 | 0 | 0 |
| 6077<br>5 | [M]ADRENAL CORTICAL CARCINOMA                                  | 0 | 0 | 0 | 0 | 0 | 0 | 0 | 0 | 0 | 0 | 0 | 0 | 2 | 0 | 0 | 0 | 0 | 0 |
| 6080<br>3 | [M]Paget's disease, breast                                     | 0 | 0 | 0 | 0 | 0 | 0 | 0 | 0 | 0 | 0 | 0 | 0 | 2 | 0 | 0 | 0 | 0 | 0 |
| 6106<br>4 | MALIGNANT NEOPLASM OF MEDIASTINUM,<br>PART UNSPECIFIED         | 0 | 0 | 0 | 0 | 0 | 0 | 0 | 0 | 0 | 0 | 0 | 0 | 2 | 0 | 0 | 0 | 0 | 0 |
| 6108<br>2 | [M]Pneumoblastoma                                              | 0 | 0 | 0 | 0 | 0 | 0 | 0 | 0 | 0 | 0 | 0 | 0 | 2 | 0 | 0 | 0 | 0 | 0 |
| 6119<br>4 | Malignant neoplasm of skin of lower limb or<br>hip NOS         | 0 | 0 | 0 | 0 | 0 | 0 | 0 | 0 | 0 | 0 | 0 | 0 | 2 | 0 | 0 | 0 | 0 | 0 |
| 6124<br>6 | Malignant melanoma of heel                                     | 0 | 0 | 0 | 0 | 0 | 0 | 0 | 0 | 0 | 0 | 0 | 0 | 2 | 0 | 0 | 0 | 0 | 0 |
| 6139<br>0 | Malignant neoplasm of adrenal cortex                           | 0 | 0 | 0 | 0 | 0 | 0 | 0 | 0 | 0 | 0 | 0 | 0 | 2 | 0 | 0 | 0 | 0 | 0 |
| 6139<br>9 | MALIGNANT NEOPLASM OF CEREBRAL<br>CORTEX                       | 0 | 0 | 0 | 0 | 0 | 0 | 0 | 0 | 0 | 0 | 0 | 0 | 2 | 0 | 0 | 0 | 0 | 0 |
| 6146<br>7 | [M]FOLLICULAR ADENOCARCINOMA,<br>TRABECULAR TYPE               | 0 | 0 | 0 | 0 | 0 | 0 | 0 | 0 | 0 | 0 | 0 | 0 | 2 | 0 | 0 | 0 | 0 | 0 |
| 6151<br>0 | Malignant neoplasm of palatoglossal arch                       | 0 | 0 | 0 | 0 | 0 | 0 | 0 | 0 | 0 | 0 | 0 | 0 | 2 | 0 | 0 | 0 | 0 | 0 |
| 6154<br>2 | [M]MALIGNANT TERATOMA,<br>UNDIFFERENTIATED TYPE                | 0 | 0 | 0 | 0 | 0 | 0 | 0 | 0 | 0 | 0 | 0 | 0 | 2 | 0 | 0 | 0 | 0 | 0 |
| 6155<br>5 | Malignant neoplasm of retroperitoneum NOS                      | 0 | 0 | 0 | 0 | 0 | 0 | 0 | 0 | 0 | 0 | 0 | 0 | 2 | 0 | 0 | 0 | 0 | 0 |
| 6158<br>8 | [M]SIGNET RING CELL CARCINOMA                                  | 0 | 0 | 0 | 0 | 0 | 0 | 0 | 0 | 0 | 0 | 0 | 0 | 2 | 0 | 0 | 0 | 0 | 0 |
| 6164<br>3 | Malignant neoplasm of intrahepatic bile ducts<br>NOS           | 0 | 0 | 0 | 0 | 0 | 0 | 0 | 0 | 0 | 0 | 0 | 0 | 2 | 0 | 0 | 0 | 0 | 0 |
| 6165<br>5 | [V]Personal history of malignant neoplasm -<br>accessory sinus | 0 | 0 | 0 | 0 | 0 | 0 | 0 | 0 | 0 | 0 | 0 | 0 | 2 | 0 | 0 | 0 | 0 | 0 |
| 6169<br>2 | Malignant neoplasm of lip unspecified                          | 0 | 0 | 0 | 0 | 0 | 0 | 0 | 0 | 0 | 0 | 0 | 0 | 2 | 0 | 0 | 0 | 0 | 0 |
| 6169<br>5 | MALIGNANT NEOPLASM OF CERVICAL<br>OESOPHAGUS                   | 0 | 0 | 0 | 0 | 0 | 0 | 0 | 0 | 0 | 0 | 0 | 0 | 2 | 0 | 0 | 0 | 0 | 0 |
| 6171<br>6 | MALIGNANT NEOPLASM OF PERIPHERAL<br>NERVE,UPP LIMB,INCL SHOULD | 0 | 0 | 0 | 0 | 0 | 0 | 0 | 0 | 0 | 0 | 0 | 0 | 2 | 0 | 0 | 0 | 0 | 0 |
| 6174<br>1 | Malignant neoplasm of humerus                                  | 0 | 0 | 0 | 0 | 0 | 0 | 0 | 0 | 0 | 0 | 0 | 0 | 2 | 0 | 0 | 0 | 0 | 0 |

|       |                                                              |   |   |   |   |   |   |   |   |   |   |   |   |   |   |   |   |   |   |
|-------|--------------------------------------------------------------|---|---|---|---|---|---|---|---|---|---|---|---|---|---|---|---|---|---|
| 61783 | [M]JUVENILE ASTROCYTOMA                                      | 0 | 0 | 0 | 0 | 0 | 0 | 0 | 0 | 0 | 0 | 0 | 0 | 0 | 2 | 0 | 0 | 0 | 0 |
| 61984 | [M]Spheroidal cell carcinoma                                 | 0 | 0 | 0 | 0 | 0 | 0 | 0 | 0 | 0 | 0 | 0 | 0 | 0 | 2 | 0 | 0 | 0 | 0 |
| 62080 | MALIGNANT NEOPLASM OF SKIN OF EXTERNAL AUDITORY MEATUS       | 0 | 0 | 0 | 0 | 0 | 0 | 0 | 0 | 0 | 0 | 0 | 0 | 0 | 2 | 0 | 0 | 0 | 0 |
| 62088 | [M]MALIGNANT MELANOMA IN HUTCHINSON'S MELANOTIC FRECKLE      | 0 | 0 | 0 | 0 | 0 | 0 | 0 | 0 | 0 | 0 | 0 | 0 | 0 | 2 | 0 | 0 | 0 | 0 |
| 62104 | MALIGNANT NEOPLASM OF TEMPORAL BONE                          | 0 | 0 | 0 | 0 | 0 | 0 | 0 | 0 | 0 | 0 | 0 | 0 | 0 | 2 | 0 | 0 | 0 | 0 |
| 62126 | Malignant neoplasm of thalamus                               | 0 | 0 | 0 | 0 | 0 | 0 | 0 | 0 | 0 | 0 | 0 | 0 | 0 | 2 | 0 | 0 | 0 | 0 |
| 62182 | MALIGNANT NEOPLASM OF VESTIBULE OF NOSE                      | 0 | 0 | 0 | 0 | 0 | 0 | 0 | 0 | 0 | 0 | 0 | 0 | 0 | 2 | 0 | 0 | 0 | 0 |
| 62305 | MALIGNANT NEOPLASM OF SKIN OF BUTTOCK                        | 0 | 0 | 0 | 0 | 0 | 0 | 0 | 0 | 0 | 0 | 0 | 0 | 0 | 2 | 0 | 0 | 0 | 0 |
| 62348 | [M]HAEMANGIOSARCOMA                                          | 0 | 0 | 0 | 0 | 0 | 0 | 0 | 0 | 0 | 0 | 0 | 0 | 0 | 2 | 0 | 0 | 0 | 0 |
| 62396 | [M]EPITHELIOD CELL SARCOMA                                   | 0 | 0 | 0 | 0 | 0 | 0 | 0 | 0 | 0 | 0 | 0 | 0 | 0 | 2 | 0 | 0 | 0 | 0 |
| 62399 | MALIG NEOP SKIN OF EAR AND EXTERNAL AURICULAR CANAL NOS      | 0 | 0 | 0 | 0 | 0 | 0 | 0 | 0 | 0 | 0 | 0 | 0 | 0 | 2 | 0 | 0 | 0 | 0 |
| 62475 | Malignant melanoma of hand                                   | 0 | 0 | 0 | 0 | 0 | 0 | 0 | 0 | 0 | 0 | 0 | 0 | 0 | 2 | 0 | 0 | 0 | 0 |
| 62556 | Malignant neoplasm of thymus                                 | 0 | 0 | 0 | 0 | 0 | 0 | 0 | 0 | 0 | 0 | 0 | 0 | 0 | 2 | 0 | 0 | 0 | 0 |
| 62630 | Malignant neoplasm of long bones of leg NOS                  | 0 | 0 | 0 | 0 | 0 | 0 | 0 | 0 | 0 | 0 | 0 | 0 | 0 | 2 | 0 | 0 | 0 | 0 |
| 62761 | Malignant neoplasm of septum of nose                         | 0 | 0 | 0 | 0 | 0 | 0 | 0 | 0 | 0 | 0 | 0 | 0 | 0 | 2 | 0 | 0 | 0 | 0 |
| 62785 | [V]Personal history of malignant neoplasm of rectum          | 0 | 0 | 0 | 0 | 0 | 0 | 0 | 0 | 0 | 0 | 0 | 0 | 0 | 2 | 0 | 0 | 0 | 0 |
| 62814 | [V]Personal history of malig neop of gastrointestinal tract  | 0 | 0 | 0 | 0 | 0 | 0 | 0 | 0 | 0 | 0 | 0 | 0 | 0 | 2 | 0 | 0 | 0 | 0 |
| 62840 | MALIGNANT NEOPLASM OF VENTRAL SURFACE OF TONGUE              | 0 | 0 | 0 | 0 | 0 | 0 | 0 | 0 | 0 | 0 | 0 | 0 | 0 | 2 | 0 | 0 | 0 | 0 |
| 62941 | [M]Neurofibrosarcoma                                         | 0 | 0 | 0 | 0 | 0 | 0 | 0 | 0 | 0 | 0 | 0 | 0 | 0 | 2 | 0 | 0 | 0 | 0 |
| 63102 | [M]Islet cell carcinoma                                      | 0 | 0 | 0 | 0 | 0 | 0 | 0 | 0 | 0 | 0 | 0 | 0 | 0 | 2 | 0 | 0 | 0 | 0 |
| 63104 | Malignant neoplasm of orbit NOS                              | 0 | 0 | 0 | 0 | 0 | 0 | 0 | 0 | 0 | 0 | 0 | 0 | 0 | 2 | 0 | 0 | 0 | 0 |
| 63224 | Malignant neoplasm of penis and other male genital organ NOS | 0 | 0 | 0 | 0 | 0 | 0 | 0 | 0 | 0 | 0 | 0 | 0 | 0 | 2 | 0 | 0 | 0 | 0 |
| 63247 | [M]Sarcoma botryoides                                        | 0 | 0 | 0 | 0 | 0 | 0 | 0 | 0 | 0 | 0 | 0 | 0 | 0 | 2 | 0 | 0 | 0 | 0 |
| 63286 | [M]CLEAR CELL SARCOMA OF TENDONS AND APONEUROSES             | 0 | 0 | 0 | 0 | 0 | 0 | 0 | 0 | 0 | 0 | 0 | 0 | 0 | 2 | 0 | 0 | 0 | 0 |

|           |                                                              |   |   |   |   |   |   |   |   |   |   |   |   |   |   |   |   |   |   |   |
|-----------|--------------------------------------------------------------|---|---|---|---|---|---|---|---|---|---|---|---|---|---|---|---|---|---|---|
| 6330<br>0 | [X]Malignant neoplasm/overlap lesion/bone+articlur cartilage | 0 | 0 | 0 | 0 | 0 | 0 | 0 | 0 | 0 | 0 | 0 | 0 | 0 | 2 | 0 | 0 | 0 | 0 | 0 |
| 6333<br>1 | Malignant neoplasm of spermatic cord                         | 0 | 0 | 0 | 0 | 0 | 0 | 0 | 0 | 0 | 0 | 0 | 0 | 0 | 2 | 0 | 0 | 0 | 0 | 0 |
| 6343<br>0 | MALIGNANT NEOPLASM OF ENDOCARDIUM                            | 0 | 0 | 0 | 0 | 0 | 0 | 0 | 0 | 0 | 0 | 0 | 0 | 0 | 2 | 0 | 0 | 0 | 0 | 0 |
| 6346<br>0 | Malignant neoplasm of arytenoid cartilage                    | 0 | 0 | 0 | 0 | 0 | 0 | 0 | 0 | 0 | 0 | 0 | 0 | 0 | 2 | 0 | 0 | 0 | 0 | 0 |
| 6347<br>0 | MALIGNANT NEOPLASM OF ABDOMINAL OESOPHAGUS                   | 0 | 0 | 0 | 0 | 0 | 0 | 0 | 0 | 0 | 0 | 0 | 0 | 0 | 2 | 0 | 0 | 0 | 0 | 0 |
| 6351<br>8 | [M]Adenosarcoma                                              | 0 | 0 | 0 | 0 | 0 | 0 | 0 | 0 | 0 | 0 | 0 | 0 | 0 | 2 | 0 | 0 | 0 | 0 | 0 |
| 6356<br>8 | Malignant neoplasm of peripheral nerves of head              | 0 | 0 | 0 | 0 | 0 | 0 | 0 | 0 | 0 | 0 | 0 | 0 | 0 | 2 | 0 | 0 | 0 | 0 | 0 |
| 6357<br>1 | [M]PAROSTEAL OSTEOSARCOMA                                    | 0 | 0 | 0 | 0 | 0 | 0 | 0 | 0 | 0 | 0 | 0 | 0 | 0 | 2 | 0 | 0 | 0 | 0 | 0 |
| 6357<br>4 | [M]MALIGNANT MELANOMA IN JUNCTIONAL NAEVUS                   | 0 | 0 | 0 | 0 | 0 | 0 | 0 | 0 | 0 | 0 | 0 | 0 | 0 | 2 | 0 | 0 | 0 | 0 | 0 |
| 6359<br>8 | [X]Malignant neoplasms/independent (primary) multiple sites  | 0 | 0 | 0 | 0 | 0 | 0 | 0 | 0 | 0 | 0 | 0 | 0 | 0 | 2 | 0 | 0 | 0 | 0 | 0 |
| 6365<br>7 | MALIGNANT NEOPLASM OF CONJUNCTIVA                            | 0 | 0 | 0 | 0 | 0 | 0 | 0 | 0 | 0 | 0 | 0 | 0 | 0 | 2 | 0 | 0 | 0 | 0 | 0 |
| 6365<br>9 | [M]Juxtacortical chondrosarcoma                              | 0 | 0 | 0 | 0 | 0 | 0 | 0 | 0 | 0 | 0 | 0 | 0 | 0 | 2 | 0 | 0 | 0 | 0 | 0 |
| 6369<br>5 | MALIGNANT NEOPLASM OF PERIPHERAL NERVE OF THORAX             | 0 | 0 | 0 | 0 | 0 | 0 | 0 | 0 | 0 | 0 | 0 | 0 | 0 | 2 | 0 | 0 | 0 | 0 | 0 |
| 6392<br>5 | [X]MALIGNANT NEOPLASM OF MENINGES, UNSPECIFIED               | 0 | 0 | 0 | 0 | 0 | 0 | 0 | 0 | 0 | 0 | 0 | 0 | 0 | 2 | 0 | 0 | 0 | 0 | 0 |
| 6397<br>9 | MALIGNANT NEOPLASM OF FRENULUM LINGUAE                       | 0 | 0 | 0 | 0 | 0 | 0 | 0 | 0 | 0 | 0 | 0 | 0 | 0 | 2 | 0 | 0 | 0 | 0 | 0 |
| 6398<br>8 | MALIGNANT NEOPLASM OF CONNECTIVE AND SOFT TISSUE OF THUMB    | 0 | 0 | 0 | 0 | 0 | 0 | 0 | 0 | 0 | 0 | 0 | 0 | 0 | 2 | 0 | 0 | 0 | 0 | 0 |
| 6399<br>5 | MALIGNANT NEOPLASM OF MECKEL'S DIVERTICULUM                  | 0 | 0 | 0 | 0 | 0 | 0 | 0 | 0 | 0 | 0 | 0 | 0 | 0 | 2 | 0 | 0 | 0 | 0 | 0 |
| 6399<br>7 | MALIGNANT MELANOMA OF THUMB                                  | 0 | 0 | 0 | 0 | 0 | 0 | 0 | 0 | 0 | 0 | 0 | 0 | 0 | 2 | 0 | 0 | 0 | 0 | 0 |
| 6410<br>6 | MALIGNANT NEOPLASM OF SPECIFIED PARTS OF PERITONEUM NOS      | 0 | 0 | 0 | 0 | 0 | 0 | 0 | 0 | 0 | 0 | 0 | 0 | 0 | 2 | 0 | 0 | 0 | 0 | 0 |
| 6419<br>5 | MALIG NEOP OF ENDOCRINE GLAND OR RELATED STRUCTURE NOS       | 0 | 0 | 0 | 0 | 0 | 0 | 0 | 0 | 0 | 0 | 0 | 0 | 0 | 2 | 0 | 0 | 0 | 0 | 0 |
| 6427<br>0 | Malignant neoplasm of skin of ankle                          | 0 | 0 | 0 | 0 | 0 | 0 | 0 | 0 | 0 | 0 | 0 | 0 | 0 | 2 | 0 | 0 | 0 | 0 | 0 |
| 6430<br>9 | [X]Malignant neoplasm of endocrine gland, unspecified        | 0 | 0 | 0 | 0 | 0 | 0 | 0 | 0 | 0 | 0 | 0 | 0 | 0 | 2 | 0 | 0 | 0 | 0 | 0 |
| 6432<br>7 | MALIGNANT MELANOMA OF LOWER LIMB OR HIP NOS                  | 0 | 0 | 0 | 0 | 0 | 0 | 0 | 0 | 0 | 0 | 0 | 0 | 0 | 2 | 0 | 0 | 0 | 0 | 0 |
| 6434<br>5 | Malignant neoplasm of connective and soft tissue, upper arm  | 0 | 0 | 0 | 0 | 0 | 0 | 0 | 0 | 0 | 0 | 0 | 0 | 0 | 2 | 0 | 0 | 0 | 0 | 0 |

|      |   |                                                             |   |   |   |   |   |   |   |   |   |   |   |   |   |   |   |   |   |
|------|---|-------------------------------------------------------------|---|---|---|---|---|---|---|---|---|---|---|---|---|---|---|---|---|
| 6440 | 6 | Malignant neoplasm of skin of thumb                         | 0 | 0 | 0 | 0 | 0 | 0 | 0 | 0 | 0 | 0 | 0 | 0 | 2 | 0 | 0 | 0 | 0 |
| 6446 | 2 | Malignant neoplasm of posterior pharynx                     | 0 | 0 | 0 | 0 | 0 | 0 | 0 | 0 | 0 | 0 | 0 | 0 | 2 | 0 | 0 | 0 | 0 |
| 6449 | 7 | [X]MALIGNANT NEOPLASM OF UTERINE ADNEXA, UNSPECIFIED        | 0 | 0 | 0 | 0 | 0 | 0 | 0 | 0 | 0 | 0 | 0 | 0 | 2 | 0 | 0 | 0 | 0 |
| 6451 | 6 | MALIGNANT NEOPLASM OF PARIETAL PERITONEUM                   | 0 | 0 | 0 | 0 | 0 | 0 | 0 | 0 | 0 | 0 | 0 | 0 | 2 | 0 | 0 | 0 | 0 |
| 6455 | 7 | MALIGNANT NEOPLASM OF CEREBRAL PEDUNCLE                     | 0 | 0 | 0 | 0 | 0 | 0 | 0 | 0 | 0 | 0 | 0 | 0 | 2 | 0 | 0 | 0 | 0 |
| 6456 | 8 | [V]Personal history of malig neop of gastrointestinal tract | 0 | 0 | 0 | 0 | 0 | 0 | 0 | 0 | 0 | 0 | 0 | 0 | 2 | 0 | 0 | 0 | 0 |
| 6459 | 6 | [M]MYXOID LEIOMYOSARCOMA                                    | 0 | 0 | 0 | 0 | 0 | 0 | 0 | 0 | 0 | 0 | 0 | 0 | 2 | 0 | 0 | 0 | 0 |
| 6460 | 2 | Malignant neoplasm of undescended testis                    | 0 | 0 | 0 | 0 | 0 | 0 | 0 | 0 | 0 | 0 | 0 | 0 | 2 | 0 | 0 | 0 | 0 |
| 6468 | 6 | MALIGNANT NEOPLASM OF AREOLA OF FEMALE BREAST               | 0 | 0 | 0 | 0 | 0 | 0 | 0 | 0 | 0 | 0 | 0 | 0 | 2 | 0 | 0 | 0 | 0 |
| 6472 | 7 | Dukes stage D                                               | 0 | 0 | 0 | 0 | 0 | 0 | 0 | 0 | 0 | 0 | 0 | 0 | 2 | 0 | 0 | 0 | 0 |
| 6481 | 0 | Malignant neoplasm of thorax NOS                            | 0 | 0 | 0 | 0 | 0 | 0 | 0 | 0 | 0 | 0 | 0 | 0 | 2 | 0 | 0 | 0 | 0 |
| 6481 | 7 | MALIGNANT NEOPLASM OF LACRIMAL GLAND                        | 0 | 0 | 0 | 0 | 0 | 0 | 0 | 0 | 0 | 0 | 0 | 0 | 2 | 0 | 0 | 0 | 0 |
| 6484 | 8 | MALIGNANT NEOPLASM OF ULNA                                  | 0 | 0 | 0 | 0 | 0 | 0 | 0 | 0 | 0 | 0 | 0 | 0 | 2 | 0 | 0 | 0 | 0 |
| 6489 | 7 | [X]Malignant neoplasms/independent(primary)multiple sites   | 0 | 0 | 0 | 0 | 0 | 0 | 0 | 0 | 0 | 0 | 0 | 0 | 2 | 0 | 0 | 0 | 0 |
| 6497 | 1 | Malignant neoplasm of olfactory bulb                        | 0 | 0 | 0 | 0 | 0 | 0 | 0 | 0 | 0 | 0 | 0 | 0 | 2 | 0 | 0 | 0 | 0 |
| 6504 | 7 | [M]PHAEOCHROMOCYTOMA, MALIGNANT                             | 0 | 0 | 0 | 0 | 0 | 0 | 0 | 0 | 0 | 0 | 0 | 0 | 2 | 0 | 0 | 0 | 0 |
| 6505 | 1 | [M]Papillary cystadenocarcinoma, NOS                        | 0 | 0 | 0 | 0 | 0 | 0 | 0 | 0 | 0 | 0 | 0 | 0 | 2 | 0 | 0 | 0 | 0 |
| 6510 | 6 | MALIGNANT NEOPLASM OF UTERINE ADNEXA NOS                    | 0 | 0 | 0 | 0 | 0 | 0 | 0 | 0 | 0 | 0 | 0 | 0 | 2 | 0 | 0 | 0 | 0 |
| 6512 | 4 | MALIGNANT NEOPLASM OF INTERLOBULAR BILE DUCTS               | 0 | 0 | 0 | 0 | 0 | 0 | 0 | 0 | 0 | 0 | 0 | 0 | 2 | 0 | 0 | 0 | 0 |
| 6515 | 9 | Malignant neoplasm of perinephric tissue                    | 0 | 0 | 0 | 0 | 0 | 0 | 0 | 0 | 0 | 0 | 0 | 0 | 2 | 0 | 0 | 0 | 0 |
| 6516 | 4 | MALIGNANT MELANOMA OF UPPER LIMB AND SHOULDER               | 0 | 0 | 0 | 0 | 0 | 0 | 0 | 0 | 0 | 0 | 0 | 0 | 2 | 0 | 0 | 0 | 0 |
| 6521 | 5 | Malignant neoplasm of sphenoidal sinus                      | 0 | 0 | 0 | 0 | 0 | 0 | 0 | 0 | 0 | 0 | 0 | 0 | 2 | 0 | 0 | 0 | 0 |
| 6521 | 6 | [M]Cloacogenic carcinoma                                    | 0 | 0 | 0 | 0 | 0 | 0 | 0 | 0 | 0 | 0 | 0 | 0 | 2 | 0 | 0 | 0 | 0 |

|           |                                                             |   |   |   |   |   |   |   |   |   |   |   |   |   |   |   |   |   |   |   |
|-----------|-------------------------------------------------------------|---|---|---|---|---|---|---|---|---|---|---|---|---|---|---|---|---|---|---|
| 6523<br>3 | Malig neop connective and soft tissue other specified site  | 0 | 0 | 0 | 0 | 0 | 0 | 0 | 0 | 0 | 0 | 0 | 0 | 0 | 2 | 0 | 0 | 0 | 0 | 0 |
| 6524<br>1 | MALIGNANT NEOPLASM, OVERLAPPING LESION OF BRAIN             | 0 | 0 | 0 | 0 | 0 | 0 | 0 | 0 | 0 | 0 | 0 | 0 | 0 | 2 | 0 | 0 | 0 | 0 | 0 |
| 6531<br>2 | Malignant neoplasm of anterior wall of stomach NEC          | 0 | 0 | 0 | 0 | 0 | 0 | 0 | 0 | 0 | 0 | 0 | 0 | 0 | 2 | 0 | 0 | 0 | 0 | 0 |
| 6535<br>7 | Malignant neoplasm of nasolacrimal duct                     | 0 | 0 | 0 | 0 | 0 | 0 | 0 | 0 | 0 | 0 | 0 | 0 | 0 | 2 | 0 | 0 | 0 | 0 | 0 |
| 6537<br>2 | Malignant neoplasm of other specified site of stomach NOS   | 0 | 0 | 0 | 0 | 0 | 0 | 0 | 0 | 0 | 0 | 0 | 0 | 0 | 2 | 0 | 0 | 0 | 0 | 0 |
| 6545<br>8 | MALIG NEOP OF OTHER AND UNSPECIFIED PARTS OF NERVOUS SYSTEM | 0 | 0 | 0 | 0 | 0 | 0 | 0 | 0 | 0 | 0 | 0 | 0 | 0 | 2 | 0 | 0 | 0 | 0 | 0 |
| 6546<br>0 | Malignant neoplasm of spleen NEC                            | 0 | 0 | 0 | 0 | 0 | 0 | 0 | 0 | 0 | 0 | 0 | 0 | 0 | 2 | 0 | 0 | 0 | 0 | 0 |
| 6546<br>6 | Kaposi's sarcoma of multiple organs                         | 0 | 0 | 0 | 0 | 0 | 0 | 0 | 0 | 0 | 0 | 0 | 0 | 0 | 2 | 0 | 0 | 0 | 0 | 0 |
| 6559<br>9 | Malignant neoplasm of acoustic nerve                        | 0 | 0 | 0 | 0 | 0 | 0 | 0 | 0 | 0 | 0 | 0 | 0 | 0 | 2 | 0 | 0 | 0 | 0 | 0 |
| 6560<br>5 | MALIGNANT NEOPLASM OF MYOCARDIUM                            | 0 | 0 | 0 | 0 | 0 | 0 | 0 | 0 | 0 | 0 | 0 | 0 | 0 | 2 | 0 | 0 | 0 | 0 | 0 |
| 6562<br>5 | MALIGNANT MELANOMA OF SCALP AND NECK                        | 0 | 0 | 0 | 0 | 0 | 0 | 0 | 0 | 0 | 0 | 0 | 0 | 0 | 2 | 0 | 0 | 0 | 0 | 0 |
| 6578<br>2 | Malignant neoplasm of skin of toe                           | 0 | 0 | 0 | 0 | 0 | 0 | 0 | 0 | 0 | 0 | 0 | 0 | 0 | 2 | 0 | 0 | 0 | 0 | 0 |
| 6579<br>3 | Malig neop of upper respiratory tract, part unspecified     | 0 | 0 | 0 | 0 | 0 | 0 | 0 | 0 | 0 | 0 | 0 | 0 | 0 | 2 | 0 | 0 | 0 | 0 | 0 |
| 6586<br>1 | [M]DERMOID CYST WITH MALIGNANT TRANSFORMATION               | 0 | 0 | 0 | 0 | 0 | 0 | 0 | 0 | 0 | 0 | 0 | 0 | 0 | 2 | 0 | 0 | 0 | 0 | 0 |
| 6588<br>0 | MALIG NEOP OF SCAPULA AND LONG BONES OF UPPER ARM NOS       | 0 | 0 | 0 | 0 | 0 | 0 | 0 | 0 | 0 | 0 | 0 | 0 | 0 | 2 | 0 | 0 | 0 | 0 | 0 |
| 6595<br>2 | [M]DESMOPLASTIC MEDULLOBLASTOMA                             | 0 | 0 | 0 | 0 | 0 | 0 | 0 | 0 | 0 | 0 | 0 | 0 | 0 | 2 | 0 | 0 | 0 | 0 | 0 |
| 6600<br>0 | [M]ADENOCARCINOMA WITH APOCRINE METAPLASIA                  | 0 | 0 | 0 | 0 | 0 | 0 | 0 | 0 | 0 | 0 | 0 | 0 | 0 | 2 | 0 | 0 | 0 | 0 | 0 |
| 6606<br>4 | [M]GIANT CELL GLIOBLASTOMA                                  | 0 | 0 | 0 | 0 | 0 | 0 | 0 | 0 | 0 | 0 | 0 | 0 | 0 | 2 | 0 | 0 | 0 | 0 | 0 |
| 6608<br>8 | Malig neop of connective and soft tissue of hip and leg     | 0 | 0 | 0 | 0 | 0 | 0 | 0 | 0 | 0 | 0 | 0 | 0 | 0 | 2 | 0 | 0 | 0 | 0 | 0 |
| 6616<br>6 | Malignant neoplasm                                          | 0 | 0 | 0 | 0 | 0 | 0 | 0 | 0 | 0 | 0 | 0 | 0 | 0 | 2 | 0 | 0 | 0 | 0 | 0 |
| 6627<br>0 | MALIGNANT NEOPLASM OF UPPER LIP, EXTERNAL                   | 0 | 0 | 0 | 0 | 0 | 0 | 0 | 0 | 0 | 0 | 0 | 0 | 0 | 2 | 0 | 0 | 0 | 0 | 0 |
| 6631<br>9 | MALIGNANT NEOPLASM OF SKIN OF GROIN                         | 0 | 0 | 0 | 0 | 0 | 0 | 0 | 0 | 0 | 0 | 0 | 0 | 0 | 2 | 0 | 0 | 0 | 0 | 0 |
| 6638<br>4 | MALIGNANT NEOPLASM OF LOWER LIP, EXTERNAL                   | 0 | 0 | 0 | 0 | 0 | 0 | 0 | 0 | 0 | 0 | 0 | 0 | 0 | 2 | 0 | 0 | 0 | 0 | 0 |
| 6642<br>2 | MALIGNANT NEOPLASM, OVERLAPPING LESION OF NASOPHARYNX       | 0 | 0 | 0 | 0 | 0 | 0 | 0 | 0 | 0 | 0 | 0 | 0 | 0 | 2 | 0 | 0 | 0 | 0 | 0 |

|           |                                                              |   |   |   |   |   |   |   |   |   |   |   |   |   |   |   |   |   |   |   |
|-----------|--------------------------------------------------------------|---|---|---|---|---|---|---|---|---|---|---|---|---|---|---|---|---|---|---|
| 6644<br>4 | [X]Malignant neoplasm/overlap lesion/heart,mediastinm+pleura | 0 | 0 | 0 | 0 | 0 | 0 | 0 | 0 | 0 | 0 | 0 | 0 | 0 | 2 | 0 | 0 | 0 | 0 | 0 |
| 6644<br>7 | MALIGNANT NEOPLASM OF SKIN OF SCAPULAR REGION                | 0 | 0 | 0 | 0 | 0 | 0 | 0 | 0 | 0 | 0 | 0 | 0 | 0 | 2 | 0 | 0 | 0 | 0 | 0 |
| 6645<br>7 | [V]Personal history of other specified malignant neoplasm    | 0 | 0 | 0 | 0 | 0 | 0 | 0 | 0 | 0 | 0 | 0 | 0 | 0 | 2 | 0 | 0 | 0 | 0 | 0 |
| 6648<br>8 | MALIG NEOP OF CONNECTIVE AND SOFT TISSUE OF ABDOMINAL WALL   | 0 | 0 | 0 | 0 | 0 | 0 | 0 | 0 | 0 | 0 | 0 | 0 | 0 | 2 | 0 | 0 | 0 | 0 | 0 |
| 6654<br>1 | [M]Round cell carcinoma                                      | 0 | 0 | 0 | 0 | 0 | 0 | 0 | 0 | 0 | 0 | 0 | 0 | 0 | 2 | 0 | 0 | 0 | 0 | 0 |
| 6660<br>7 | [M]Mixed tumour                                              | 0 | 0 | 0 | 0 | 0 | 0 | 0 | 0 | 0 | 0 | 0 | 0 | 0 | 2 | 0 | 0 | 0 | 0 | 0 |
| 6663<br>9 | Malignant neoplasm of clavicle                               | 0 | 0 | 0 | 0 | 0 | 0 | 0 | 0 | 0 | 0 | 0 | 0 | 0 | 2 | 0 | 0 | 0 | 0 | 0 |
| 6664<br>6 | MALIGNANT NEOPLASM, OVERLAP LESION OF RESP & INTRATHOR ORGS  | 0 | 0 | 0 | 0 | 0 | 0 | 0 | 0 | 0 | 0 | 0 | 0 | 0 | 2 | 0 | 0 | 0 | 0 | 0 |
| 6675<br>0 | Malignant neoplasm of heart                                  | 0 | 0 | 0 | 0 | 0 | 0 | 0 | 0 | 0 | 0 | 0 | 0 | 0 | 2 | 0 | 0 | 0 | 0 | 0 |
| 6687<br>6 | [M]PSEUDOMUCINOUS ADENOCARCINOMA                             | 0 | 0 | 0 | 0 | 0 | 0 | 0 | 0 | 0 | 0 | 0 | 0 | 0 | 2 | 0 | 0 | 0 | 0 | 0 |
| 6690<br>8 | MALIGNANT NEOPLASM OF COCCYGEAL VERTEBRA                     | 0 | 0 | 0 | 0 | 0 | 0 | 0 | 0 | 0 | 0 | 0 | 0 | 0 | 2 | 0 | 0 | 0 | 0 | 0 |
| 6701<br>9 | [M]Angiomyosarcoma                                           | 0 | 0 | 0 | 0 | 0 | 0 | 0 | 0 | 0 | 0 | 0 | 0 | 0 | 2 | 0 | 0 | 0 | 0 | 0 |
| 6703<br>4 | [X]MESOTHELIOMA OF OTHER SITES                               | 0 | 0 | 0 | 0 | 0 | 0 | 0 | 0 | 0 | 0 | 0 | 0 | 0 | 2 | 0 | 0 | 0 | 0 | 0 |
| 6710<br>7 | MALIGNANT NEOPLASM OF PARIETAL PLEURA                        | 0 | 0 | 0 | 0 | 0 | 0 | 0 | 0 | 0 | 0 | 0 | 0 | 0 | 2 | 0 | 0 | 0 | 0 | 0 |
| 6721<br>1 | Malignant neoplasm of spinal meninges NOS                    | 0 | 0 | 0 | 0 | 0 | 0 | 0 | 0 | 0 | 0 | 0 | 0 | 0 | 2 | 0 | 0 | 0 | 0 | 0 |
| 6721<br>7 | MALIGNANT NEOPLASM OF TRUNK NOS                              | 0 | 0 | 0 | 0 | 0 | 0 | 0 | 0 | 0 | 0 | 0 | 0 | 0 | 2 | 0 | 0 | 0 | 0 | 0 |
| 6723<br>6 | MALIGNANT NEOPLASM OF HIPPOCAMPUS                            | 0 | 0 | 0 | 0 | 0 | 0 | 0 | 0 | 0 | 0 | 0 | 0 | 0 | 2 | 0 | 0 | 0 | 0 | 0 |
| 6728<br>8 | [M]Medulloepithelioma NOS                                    | 0 | 0 | 0 | 0 | 0 | 0 | 0 | 0 | 0 | 0 | 0 | 0 | 0 | 2 | 0 | 0 | 0 | 0 | 0 |
| 6732<br>3 | MALIGNANT NEOPLASM OF OROPHARYNX, OTHER SPECIFIED SITES      | 0 | 0 | 0 | 0 | 0 | 0 | 0 | 0 | 0 | 0 | 0 | 0 | 0 | 2 | 0 | 0 | 0 | 0 | 0 |
| 6732<br>4 | MALIG NEOP OF CONNECTIVE AND SOFT TISSUE OF INGUINAL REGION  | 0 | 0 | 0 | 0 | 0 | 0 | 0 | 0 | 0 | 0 | 0 | 0 | 0 | 2 | 0 | 0 | 0 | 0 | 0 |
| 6734<br>2 | [M]Adenocarcinoma in villous adenoma                         | 0 | 0 | 0 | 0 | 0 | 0 | 0 | 0 | 0 | 0 | 0 | 0 | 0 | 2 | 0 | 0 | 0 | 0 | 0 |
| 6743<br>0 | [M]TIBIAL ADAMANTINOMA                                       | 0 | 0 | 0 | 0 | 0 | 0 | 0 | 0 | 0 | 0 | 0 | 0 | 0 | 2 | 0 | 0 | 0 | 0 | 0 |
| 6744<br>6 | MALIGNANT NEOPLASM OF LOWER LIP, VERMILION BORDER            | 0 | 0 | 0 | 0 | 0 | 0 | 0 | 0 | 0 | 0 | 0 | 0 | 0 | 2 | 0 | 0 | 0 | 0 | 0 |
| 6745<br>1 | MALIGNANT NEOPLASM/OVERLAP LESION/BONE+ARTICULR CARTILAGE    | 0 | 0 | 0 | 0 | 0 | 0 | 0 | 0 | 0 | 0 | 0 | 0 | 0 | 2 | 0 | 0 | 0 | 0 | 0 |

|      |   |                                                            |   |   |   |   |   |   |   |   |   |   |   |   |   |   |   |   |   |   |
|------|---|------------------------------------------------------------|---|---|---|---|---|---|---|---|---|---|---|---|---|---|---|---|---|---|
| 6749 | 7 | Malignant neoplasm                                         | 0 | 0 | 0 | 0 | 0 | 0 | 0 | 0 | 0 | 0 | 0 | 0 | 2 | 0 | 0 | 0 | 0 | 0 |
| 6750 | 4 | MALIGNANT NEOPLASM OF LOWER LIP, BUCCAL ASPECT             | 0 | 0 | 0 | 0 | 0 | 0 | 0 | 0 | 0 | 0 | 0 | 0 | 2 | 0 | 0 | 0 | 0 | 0 |
| 6758 | 7 | [M]PLEOMORPHIC XANTHOASTROCYTOMA                           | 0 | 0 | 0 | 0 | 0 | 0 | 0 | 0 | 0 | 0 | 0 | 0 | 2 | 0 | 0 | 0 | 0 | 0 |
| 6770 | 1 | [M]Secretory breast carcinoma                              | 0 | 0 | 0 | 0 | 0 | 0 | 0 | 0 | 0 | 0 | 0 | 0 | 2 | 0 | 0 | 0 | 0 | 0 |
| 6771 | 2 | [M]Choriocarcinoma                                         | 0 | 0 | 0 | 0 | 0 | 0 | 0 | 0 | 0 | 0 | 0 | 0 | 2 | 0 | 0 | 0 | 0 | 0 |
| 6774 | 8 | MALIGNANT NEOPLASM OF SKIN OF UMBILICUS                    | 0 | 0 | 0 | 0 | 0 | 0 | 0 | 0 | 0 | 0 | 0 | 0 | 2 | 0 | 0 | 0 | 0 | 0 |
| 6776 | 3 | MALIGNANT NEOPLASM OF COSTO-VERTEBRAL JOINT                | 0 | 0 | 0 | 0 | 0 | 0 | 0 | 0 | 0 | 0 | 0 | 0 | 2 | 0 | 0 | 0 | 0 | 0 |
| 6780 | 6 | MALIGNANT MELANOMA OF FACE NOS                             | 0 | 0 | 0 | 0 | 0 | 0 | 0 | 0 | 0 | 0 | 0 | 0 | 2 | 0 | 0 | 0 | 0 | 0 |
| 6788 | 4 | MALIGNANT NEOPLASM OF AREOLA OF MALE BREAST                | 0 | 0 | 0 | 0 | 0 | 0 | 0 | 0 | 0 | 0 | 0 | 0 | 2 | 0 | 0 | 0 | 0 | 0 |
| 6791 | 2 | [M]Papillary epidermoid carcinoma                          | 0 | 0 | 0 | 0 | 0 | 0 | 0 | 0 | 0 | 0 | 0 | 0 | 2 | 0 | 0 | 0 | 0 | 0 |
| 6791 | 4 | MALIGNANT NEOPLASM OF SKIN OF GREAT TOE                    | 0 | 0 | 0 | 0 | 0 | 0 | 0 | 0 | 0 | 0 | 0 | 0 | 2 | 0 | 0 | 0 | 0 | 0 |
| 6793 | 4 | [M]CARCINOSARCOMA, EMBRYONAL TYPE                          | 0 | 0 | 0 | 0 | 0 | 0 | 0 | 0 | 0 | 0 | 0 | 0 | 2 | 0 | 0 | 0 | 0 | 0 |
| 6794 | 9 | Malignant neoplasm of other male genital organ             | 0 | 0 | 0 | 0 | 0 | 0 | 0 | 0 | 0 | 0 | 0 | 0 | 2 | 0 | 0 | 0 | 0 | 0 |
| 6796 | 6 | [M]NABEVOCARCINOMA                                         | 0 | 0 | 0 | 0 | 0 | 0 | 0 | 0 | 0 | 0 | 0 | 0 | 2 | 0 | 0 | 0 | 0 | 0 |
| 6797 | 0 | [M]SMALL CELL CARCINOMA, FUSIFORM CELL TYPE                | 0 | 0 | 0 | 0 | 0 | 0 | 0 | 0 | 0 | 0 | 0 | 0 | 2 | 0 | 0 | 0 | 0 | 0 |
| 6801 | 8 | [V]Personal history of malignant neoplasm of anus          | 0 | 0 | 0 | 0 | 0 | 0 | 0 | 0 | 0 | 0 | 0 | 0 | 2 | 0 | 0 | 0 | 0 | 0 |
| 6802 | 7 | [X]Malignant neoplasm/other and unspecified cranial nerves | 0 | 0 | 0 | 0 | 0 | 0 | 0 | 0 | 0 | 0 | 0 | 0 | 2 | 0 | 0 | 0 | 0 | 0 |
| 6805 | 5 | MALIGNANT NEOPLASM OF LONG BONES OF LEG                    | 0 | 0 | 0 | 0 | 0 | 0 | 0 | 0 | 0 | 0 | 0 | 0 | 2 | 0 | 0 | 0 | 0 | 0 |
| 6813 | 3 | Malignant melanoma of forehead                             | 0 | 0 | 0 | 0 | 0 | 0 | 0 | 0 | 0 | 0 | 0 | 0 | 2 | 0 | 0 | 0 | 0 | 0 |
| 6815 | 5 | MALIGNANT NEOPLASM OF FUNDUS OF CORPUS UTERI               | 0 | 0 | 0 | 0 | 0 | 0 | 0 | 0 | 0 | 0 | 0 | 0 | 2 | 0 | 0 | 0 | 0 | 0 |
| 6816 | 1 | MALIGNANT NEOPLASM OF SEMINAL VESICLE                      | 0 | 0 | 0 | 0 | 0 | 0 | 0 | 0 | 0 | 0 | 0 | 0 | 2 | 0 | 0 | 0 | 0 | 0 |
| 6819 | 7 | MALIGNANT NEOPLASM OF SKIN OF POPLITEAL FOSSA AREA         | 0 | 0 | 0 | 0 | 0 | 0 | 0 | 0 | 0 | 0 | 0 | 0 | 2 | 0 | 0 | 0 | 0 | 0 |
| 6822 | 0 | [M]Fibrochondrosarcoma                                     | 0 | 0 | 0 | 0 | 0 | 0 | 0 | 0 | 0 | 0 | 0 | 0 | 2 | 0 | 0 | 0 | 0 | 0 |
| 6823 | 6 | MALIGNANT NEOPLASM OF HEAD, NECK AND FACE                  | 0 | 0 | 0 | 0 | 0 | 0 | 0 | 0 | 0 | 0 | 0 | 0 | 2 | 0 | 0 | 0 | 0 | 0 |



|           |                                                          |   |   |   |   |   |   |   |   |   |   |   |   |   |   |   |   |   |   |   |
|-----------|----------------------------------------------------------|---|---|---|---|---|---|---|---|---|---|---|---|---|---|---|---|---|---|---|
| 6839<br>9 | Malignant neoplasm of lip unspecified, mucosa            | 0 | 0 | 0 | 0 | 0 | 0 | 0 | 0 | 0 | 0 | 0 | 0 | 0 | 2 | 0 | 0 | 0 | 0 | 0 |
| 6841<br>0 | Primary angiosarcoma of liver                            | 0 | 0 | 0 | 0 | 0 | 0 | 0 | 0 | 0 | 0 | 0 | 0 | 0 | 2 | 0 | 0 | 0 | 0 | 0 |
| 6844<br>7 | [M]BLUE NAEVUS, MALIGNANT                                | 0 | 0 | 0 | 0 | 0 | 0 | 0 | 0 | 0 | 0 | 0 | 0 | 0 | 2 | 0 | 0 | 0 | 0 | 0 |
| 6845<br>6 | [M]CHROMOPHOBE CARCINOMA                                 | 0 | 0 | 0 | 0 | 0 | 0 | 0 | 0 | 0 | 0 | 0 | 0 | 0 | 2 | 0 | 0 | 0 | 0 | 0 |
| 6848<br>0 | Malignant neoplasm of nipple of male breast              | 0 | 0 | 0 | 0 | 0 | 0 | 0 | 0 | 0 | 0 | 0 | 0 | 0 | 2 | 0 | 0 | 0 | 0 | 0 |
| 6861<br>2 | [V]Personal history of unspecified malignant neoplasm    | 0 | 0 | 0 | 0 | 0 | 0 | 0 | 0 | 0 | 0 | 0 | 0 | 0 | 2 | 0 | 0 | 0 | 0 | 0 |
| 6864<br>1 | Malignant neoplasm of brain stem NOS                     | 0 | 0 | 0 | 0 | 0 | 0 | 0 | 0 | 0 | 0 | 0 | 0 | 0 | 2 | 0 | 0 | 0 | 0 | 0 |
| 6873<br>0 | [M]AMELOBLASTIC FIBROSARCOMA                             | 0 | 0 | 0 | 0 | 0 | 0 | 0 | 0 | 0 | 0 | 0 | 0 | 0 | 2 | 0 | 0 | 0 | 0 | 0 |
| 6875<br>7 | [M]Nonencapsulated sclerosing carcinoma                  | 0 | 0 | 0 | 0 | 0 | 0 | 0 | 0 | 0 | 0 | 0 | 0 | 0 | 2 | 0 | 0 | 0 | 0 | 0 |
| 6878<br>3 | [M]SKIN APPENDAGE CARCINOMA                              | 0 | 0 | 0 | 0 | 0 | 0 | 0 | 0 | 0 | 0 | 0 | 0 | 0 | 2 | 0 | 0 | 0 | 0 | 0 |
| 6878<br>7 | Malignant neoplasm of back NOS                           | 0 | 0 | 0 | 0 | 0 | 0 | 0 | 0 | 0 | 0 | 0 | 0 | 0 | 2 | 0 | 0 | 0 | 0 | 0 |
| 6882<br>4 | MALIGNANT NEOPLASM, OVERLAPPING LESION MALE GENITAL ORGS | 0 | 0 | 0 | 0 | 0 | 0 | 0 | 0 | 0 | 0 | 0 | 0 | 0 | 2 | 0 | 0 | 0 | 0 | 0 |
| 6888<br>9 | [M]Balloon cell melanoma                                 | 0 | 0 | 0 | 0 | 0 | 0 | 0 | 0 | 0 | 0 | 0 | 0 | 0 | 2 | 0 | 0 | 0 | 0 | 0 |
| 6895<br>6 | [M]GIANT CELL TUMOUR OF BONE, MALIGNANT                  | 0 | 0 | 0 | 0 | 0 | 0 | 0 | 0 | 0 | 0 | 0 | 0 | 0 | 2 | 0 | 0 | 0 | 0 | 0 |
| 6910<br>4 | MALIGNANT NEOPLASM OF CARPAL BONE - LUNATE               | 0 | 0 | 0 | 0 | 0 | 0 | 0 | 0 | 0 | 0 | 0 | 0 | 0 | 2 | 0 | 0 | 0 | 0 | 0 |
| 6914<br>6 | Malignant neoplasm of bones of skull and face NOS        | 0 | 0 | 0 | 0 | 0 | 0 | 0 | 0 | 0 | 0 | 0 | 0 | 0 | 2 | 0 | 0 | 0 | 0 | 0 |
| 6921<br>0 | [M]Goblet cell tumour                                    | 0 | 0 | 0 | 0 | 0 | 0 | 0 | 0 | 0 | 0 | 0 | 0 | 0 | 2 | 0 | 0 | 0 | 0 | 0 |
| 6930<br>0 | [M]POLYGONAL CELL CARCINOMA                              | 0 | 0 | 0 | 0 | 0 | 0 | 0 | 0 | 0 | 0 | 0 | 0 | 0 | 2 | 0 | 0 | 0 | 0 | 0 |
| 6967<br>1 | MALIGNANT NEOPLASM OF POSTERIOR THIRD OF TONGUE          | 0 | 0 | 0 | 0 | 0 | 0 | 0 | 0 | 0 | 0 | 0 | 0 | 0 | 2 | 0 | 0 | 0 | 0 | 0 |
| 6976<br>1 | MALIGNANT NEOPLASM OF LIP, VERMILION BORDER NOS          | 0 | 0 | 0 | 0 | 0 | 0 | 0 | 0 | 0 | 0 | 0 | 0 | 0 | 2 | 0 | 0 | 0 | 0 | 0 |
| 6982<br>1 | Malignant neoplasm of the pouch of Douglas               | 0 | 0 | 0 | 0 | 0 | 0 | 0 | 0 | 0 | 0 | 0 | 0 | 0 | 2 | 0 | 0 | 0 | 0 | 0 |
| 6984<br>4 | [M]Round cell sarcoma                                    | 0 | 0 | 0 | 0 | 0 | 0 | 0 | 0 | 0 | 0 | 0 | 0 | 0 | 2 | 0 | 0 | 0 | 0 | 0 |
| 6992<br>7 | Malignant neoplasm of first metatarsal bone              | 0 | 0 | 0 | 0 | 0 | 0 | 0 | 0 | 0 | 0 | 0 | 0 | 0 | 2 | 0 | 0 | 0 | 0 | 0 |
| 6995<br>1 | MALIGNANT NEOPLASM OF ROOF OF MOUTH                      | 0 | 0 | 0 | 0 | 0 | 0 | 0 | 0 | 0 | 0 | 0 | 0 | 0 | 2 | 0 | 0 | 0 | 0 | 0 |

|           |                                                             |   |   |   |   |   |   |   |   |   |   |   |   |   |   |   |   |   |   |   |
|-----------|-------------------------------------------------------------|---|---|---|---|---|---|---|---|---|---|---|---|---|---|---|---|---|---|---|
| 6997<br>8 | [M]BORDERLINE MUCINOUS CYSTADENOMA OF THE OVARY             | 0 | 0 | 0 | 0 | 0 | 0 | 0 | 0 | 0 | 0 | 0 | 0 | 0 | 2 | 0 | 0 | 0 | 0 | 0 |
| 6998<br>1 | [M]Neurilemmoma, malignant                                  | 0 | 0 | 0 | 0 | 0 | 0 | 0 | 0 | 0 | 0 | 0 | 0 | 0 | 2 | 0 | 0 | 0 | 0 | 0 |
| 7010<br>4 | Malignant neoplasm of cerebral meninges NOS                 | 0 | 0 | 0 | 0 | 0 | 0 | 0 | 0 | 0 | 0 | 0 | 0 | 0 | 2 | 0 | 0 | 0 | 0 | 0 |
| 7012<br>6 | Malignant neoplasm of optic nerve                           | 0 | 0 | 0 | 0 | 0 | 0 | 0 | 0 | 0 | 0 | 0 | 0 | 0 | 2 | 0 | 0 | 0 | 0 | 0 |
| 7038<br>0 | MALIGNANT NEOPLASM OF SKIN OF AXILLARY FOLD                 | 0 | 0 | 0 | 0 | 0 | 0 | 0 | 0 | 0 | 0 | 0 | 0 | 0 | 2 | 0 | 0 | 0 | 0 | 0 |
| 7038<br>3 | [M]BRENNER TUMOUR, MALIGNANT                                | 0 | 0 | 0 | 0 | 0 | 0 | 0 | 0 | 0 | 0 | 0 | 0 | 0 | 2 | 0 | 0 | 0 | 0 | 0 |
| 7046<br>3 | MALIGNANT NEOPLASM OF CONNECTIVE AND SOFT TISSUE OF BUTTOCK | 0 | 0 | 0 | 0 | 0 | 0 | 0 | 0 | 0 | 0 | 0 | 0 | 0 | 2 | 0 | 0 | 0 | 0 | 0 |
| 7051<br>6 | [M]Biliary tract adenomas and adenocarcinomas               | 0 | 0 | 0 | 0 | 0 | 0 | 0 | 0 | 0 | 0 | 0 | 0 | 0 | 2 | 0 | 0 | 0 | 0 | 0 |
| 7058<br>7 | MALIGNANT NEOPLASM OF SKIN OF FOOT                          | 0 | 0 | 0 | 0 | 0 | 0 | 0 | 0 | 0 | 0 | 0 | 0 | 0 | 2 | 0 | 0 | 0 | 0 | 0 |
| 7063<br>7 | Malignant melanoma of lip                                   | 0 | 0 | 0 | 0 | 0 | 0 | 0 | 0 | 0 | 0 | 0 | 0 | 0 | 2 | 0 | 0 | 0 | 0 | 0 |
| 7069<br>6 | Malignant neoplasm of other major salivary glands           | 0 | 0 | 0 | 0 | 0 | 0 | 0 | 0 | 0 | 0 | 0 | 0 | 0 | 2 | 0 | 0 | 0 | 0 | 0 |
| 7072<br>9 | Malignant neoplasm of isthmus of uterine body NOS           | 0 | 0 | 0 | 0 | 0 | 0 | 0 | 0 | 0 | 0 | 0 | 0 | 0 | 2 | 0 | 0 | 0 | 0 | 0 |
| 7081<br>9 | Malignant neoplasm of palate unspecified                    | 0 | 0 | 0 | 0 | 0 | 0 | 0 | 0 | 0 | 0 | 0 | 0 | 0 | 2 | 0 | 0 | 0 | 0 | 0 |
| 7082<br>4 | MALIGNANT NEOPLASM OF ADRENAL GLAND NOS                     | 0 | 0 | 0 | 0 | 0 | 0 | 0 | 0 | 0 | 0 | 0 | 0 | 0 | 2 | 0 | 0 | 0 | 0 | 0 |
| 7092<br>8 | MALIGNANT NEOPLASM OF SUBLINGUAL GLAND                      | 0 | 0 | 0 | 0 | 0 | 0 | 0 | 0 | 0 | 0 | 0 | 0 | 0 | 2 | 0 | 0 | 0 | 0 | 0 |
| 7094<br>2 | MALIGNANT NEOPLASM OF HYPOTHALAMUS                          | 0 | 0 | 0 | 0 | 0 | 0 | 0 | 0 | 0 | 0 | 0 | 0 | 0 | 2 | 0 | 0 | 0 | 0 | 0 |
| 7098<br>8 | MALIGNANT NEOPLASM OF SKIN OF HIP                           | 0 | 0 | 0 | 0 | 0 | 0 | 0 | 0 | 0 | 0 | 0 | 0 | 0 | 2 | 0 | 0 | 0 | 0 | 0 |
| 7113<br>6 | Malignant melanoma of chin                                  | 0 | 0 | 0 | 0 | 0 | 0 | 0 | 0 | 0 | 0 | 0 | 0 | 0 | 2 | 0 | 0 | 0 | 0 | 0 |
| 7113<br>9 | Malignant neoplasm of other parts of brain                  | 0 | 0 | 0 | 0 | 0 | 0 | 0 | 0 | 0 | 0 | 0 | 0 | 0 | 2 | 0 | 0 | 0 | 0 | 0 |
| 7114<br>7 | Malignant neoplasm of lower lip                             | 0 | 0 | 0 | 0 | 0 | 0 | 0 | 0 | 0 | 0 | 0 | 0 | 0 | 2 | 0 | 0 | 0 | 0 | 0 |
| 7120<br>4 | MALIGNANT NEOPLASM OF CARTILAGE OF NOSE                     | 0 | 0 | 0 | 0 | 0 | 0 | 0 | 0 | 0 | 0 | 0 | 0 | 0 | 2 | 0 | 0 | 0 | 0 | 0 |
| 7130<br>1 | [M]Struma ovarii, malignant                                 | 0 | 0 | 0 | 0 | 0 | 0 | 0 | 0 | 0 | 0 | 0 | 0 | 0 | 2 | 0 | 0 | 0 | 0 | 0 |
| 7149<br>7 | [M]Oxyphilic adenocarcinoma                                 | 0 | 0 | 0 | 0 | 0 | 0 | 0 | 0 | 0 | 0 | 0 | 0 | 0 | 2 | 0 | 0 | 0 | 0 | 0 |
| 7158<br>4 | Malignant neoplasm of lacrimal duct                         | 0 | 0 | 0 | 0 | 0 | 0 | 0 | 0 | 0 | 0 | 0 | 0 | 0 | 2 | 0 | 0 | 0 | 0 | 0 |

|      |                                                             |   |   |   |   |   |   |   |   |   |   |   |   |   |   |   |   |   |   |
|------|-------------------------------------------------------------|---|---|---|---|---|---|---|---|---|---|---|---|---|---|---|---|---|---|
| 7162 |                                                             | 0 |   |   |   |   |   |   |   |   |   |   |   |   |   |   |   |   |   |
| 7    | [M]SWEAT GLAND ADENOCARCINOMA                               |   | 0 | 0 | 0 | 0 | 0 | 0 | 0 | 0 | 0 | 0 | 0 | 0 | 2 | 0 | 0 | 0 | 0 |
| 7181 | MALIGNANT NEOPLASM OF SCAPULA AND LONG BONES OF UPPER ARM   | 0 |   |   |   |   |   |   |   |   |   |   |   |   | 2 | 0 | 0 | 0 | 0 |
| 0    |                                                             |   | 0 | 0 | 0 | 0 | 0 | 0 | 0 | 0 | 0 | 0 | 0 | 0 | 2 | 0 | 0 | 0 | 0 |
| 7186 |                                                             | 0 |   |   |   |   |   |   |   |   |   |   |   |   |   |   |   |   |   |
| 9    | [M]ALVEOLAR SOFT PART SARCOMA                               |   | 0 | 0 | 0 | 0 | 0 | 0 | 0 | 0 | 0 | 0 | 0 | 0 | 2 | 0 | 0 | 0 | 0 |
| 7189 |                                                             | 0 |   |   |   |   |   |   |   |   |   |   |   |   |   |   |   |   |   |
| 5    | [M]Superficial spreading adenocarcinoma                     |   | 0 | 0 | 0 | 0 | 0 | 0 | 0 | 0 | 0 | 0 | 0 | 0 | 2 | 0 | 0 | 0 | 0 |
| 7194 | MALIGNANT NEOPLASM OF MASTOID AIR CELLS                     | 0 |   |   |   |   |   |   |   |   |   |   |   |   |   |   |   |   |   |
| 6    |                                                             |   | 0 | 0 | 0 | 0 | 0 | 0 | 0 | 0 | 0 | 0 | 0 | 0 | 2 | 0 | 0 | 0 | 0 |
| 7212 |                                                             | 0 |   |   |   |   |   |   |   |   |   |   |   |   |   |   |   |   |   |
| 7    | MALIGNANT NEOPLASM OF EPIDIDYMIS                            |   | 0 | 0 | 0 | 0 | 0 | 0 | 0 | 0 | 0 | 0 | 0 | 0 | 2 | 0 | 0 | 0 | 0 |
| 7217 |                                                             | 0 |   |   |   |   |   |   |   |   |   |   |   |   |   |   |   |   |   |
| 4    | Malignant neoplasm of paraurethral glands                   |   | 0 | 0 | 0 | 0 | 0 | 0 | 0 | 0 | 0 | 0 | 0 | 0 | 2 | 0 | 0 | 0 | 0 |
| 7221 |                                                             | 0 |   |   |   |   |   |   |   |   |   |   |   |   |   |   |   |   |   |
| 2    | MALIGNANT NEOPLASM OF CALCANEUM                             |   | 0 | 0 | 0 | 0 | 0 | 0 | 0 | 0 | 0 | 0 | 0 | 0 | 2 | 0 | 0 | 0 | 0 |
| 7222 |                                                             | 0 |   |   |   |   |   |   |   |   |   |   |   |   |   |   |   |   |   |
| 4    | FIBROSARCOMA OF SPLEEN                                      |   | 0 | 0 | 0 | 0 | 0 | 0 | 0 | 0 | 0 | 0 | 0 | 0 | 2 | 0 | 0 | 0 | 0 |
| 7226 | [V]Personal history of malig neop other intrathoracic organ | 0 |   |   |   |   |   |   |   |   |   |   |   |   |   |   |   |   |   |
| 2    |                                                             |   | 0 | 0 | 0 | 0 | 0 | 0 | 0 | 0 | 0 | 0 | 0 | 0 | 2 | 0 | 0 | 0 | 0 |
| 7227 |                                                             | 0 |   |   |   |   |   |   |   |   |   |   |   |   |   |   |   |   |   |
| 7    | [M]Basophil carcinoma                                       |   | 0 | 0 | 0 | 0 | 0 | 0 | 0 | 0 | 0 | 0 | 0 | 0 | 2 | 0 | 0 | 0 | 0 |
| 7244 |                                                             | 0 |   |   |   |   |   |   |   |   |   |   |   |   |   |   |   |   |   |
| 3    | [M]JODONTOGENIC TUMOUR, MALIGNANT                           |   | 0 | 0 | 0 | 0 | 0 | 0 | 0 | 0 | 0 | 0 | 0 | 0 | 2 | 0 | 0 | 0 | 0 |
| 7244 |                                                             | 0 |   |   |   |   |   |   |   |   |   |   |   |   |   |   |   |   |   |
| 5    | MALIGNANT NEOPLASM OF CYSTIC DUCT                           |   | 0 | 0 | 0 | 0 | 0 | 0 | 0 | 0 | 0 | 0 | 0 | 0 | 2 | 0 | 0 | 0 | 0 |
| 7246 |                                                             | 0 |   |   |   |   |   |   |   |   |   |   |   |   |   |   |   |   |   |
| 4    | Malignant neoplasm of metacarpal bones                      |   | 0 | 0 | 0 | 0 | 0 | 0 | 0 | 0 | 0 | 0 | 0 | 0 | 2 | 0 | 0 | 0 | 0 |
| 7252 |                                                             | 0 |   |   |   |   |   |   |   |   |   |   |   |   |   |   |   |   |   |
| 2    | Malignant neoplasm of great vessels                         |   | 0 | 0 | 0 | 0 | 0 | 0 | 0 | 0 | 0 | 0 | 0 | 0 | 2 | 0 | 0 | 0 | 0 |
| 7272 |                                                             | 0 |   |   |   |   |   |   |   |   |   |   |   |   |   |   |   |   |   |
| 3    | Malignant neoplasm of cornu of corpus uteri                 |   | 0 | 0 | 0 | 0 | 0 | 0 | 0 | 0 | 0 | 0 | 0 | 0 | 2 | 0 | 0 | 0 | 0 |
| 7325 | [M]MALIGNANT MELANOMA IN GIANT PIGMENTED NAEVUS             | 0 |   |   |   |   |   |   |   |   |   |   |   |   |   |   |   |   |   |
| 1    |                                                             |   | 0 | 0 | 0 | 0 | 0 | 0 | 0 | 0 | 0 | 0 | 0 | 0 | 2 | 0 | 0 | 0 | 0 |
| 7327 | [M]ADENOCARCINOMA IN ADENOMATOUS POLYPOSIS COLI             | 0 |   |   |   |   |   |   |   |   |   |   |   |   |   |   |   |   |   |
| 5    |                                                             |   | 0 | 0 | 0 | 0 | 0 | 0 | 0 | 0 | 0 | 0 | 0 | 0 | 2 | 0 | 0 | 0 | 0 |
| 7329 | [X]Malignant neoplasm/bones+articular cartilage/limb,unspfd | 0 |   |   |   |   |   |   |   |   |   |   |   |   |   |   |   |   |   |
| 6    |                                                             |   | 0 | 0 | 0 | 0 | 0 | 0 | 0 | 0 | 0 | 0 | 0 | 0 | 2 | 0 | 0 | 0 | 0 |
| 7343 | [M]ADENOCARCINOMA IN MULTIPLE ADENOMATOUS POLYPS            | 0 |   |   |   |   |   |   |   |   |   |   |   |   |   |   |   |   |   |
| 4    |                                                             |   | 0 | 0 | 0 | 0 | 0 | 0 | 0 | 0 | 0 | 0 | 0 | 0 | 2 | 0 | 0 | 0 | 0 |
| 7343 | MALIGNANT NEOPLASM OF ANTERIOR EPIGLOTTIS NOS               | 0 |   |   |   |   |   |   |   |   |   |   |   |   |   |   |   |   |   |
| 9    |                                                             |   | 0 | 0 | 0 | 0 | 0 | 0 | 0 | 0 | 0 | 0 | 0 | 0 | 2 | 0 | 0 | 0 | 0 |
| 7351 | MALIGNANT NEOPLASM OF SUPRACLAVICULAR FOSSA NOS             | 0 |   |   |   |   |   |   |   |   |   |   |   |   |   |   |   |   |   |
| 0    |                                                             |   | 0 | 0 | 0 | 0 | 0 | 0 | 0 | 0 | 0 | 0 | 0 | 0 | 2 | 0 | 0 | 0 | 0 |
| 7353 |                                                             | 0 |   |   |   |   |   |   |   |   |   |   |   |   |   |   |   |   |   |
| 0    | Malignant neoplasm of hand bones                            |   | 0 | 0 | 0 | 0 | 0 | 0 | 0 | 0 | 0 | 0 | 0 | 0 | 2 | 0 | 0 | 0 | 0 |
| 7353 |                                                             | 0 |   |   |   |   |   |   |   |   |   |   |   |   |   |   |   |   |   |
| 6    | Malignant melanoma of hip                                   |   | 0 | 0 | 0 | 0 | 0 | 0 | 0 | 0 | 0 | 0 | 0 | 0 | 2 | 0 | 0 | 0 | 0 |

|           |                                                              |   |   |   |   |   |   |   |   |   |   |   |   |   |   |   |   |   |   |   |
|-----------|--------------------------------------------------------------|---|---|---|---|---|---|---|---|---|---|---|---|---|---|---|---|---|---|---|
| 7353<br>7 | MALIG NEOP AUDITORY TUBE, MIDDLE EAR, MASTOID AIR CELLS NOS  | 0 | 0 | 0 | 0 | 0 | 0 | 0 | 0 | 0 | 0 | 0 | 0 | 0 | 2 | 0 | 0 | 0 | 0 | 0 |
| 7355<br>6 | MALIGNANT NEOPLASM OF HAND BONES NOS                         | 0 | 0 | 0 | 0 | 0 | 0 | 0 | 0 | 0 | 0 | 0 | 0 | 0 | 2 | 0 | 0 | 0 | 0 | 0 |
| 7361<br>4 | MALIGNANT NEOPLASM OF LIP UNSPECIFIED, BUCCAL ASPECT         | 0 | 0 | 0 | 0 | 0 | 0 | 0 | 0 | 0 | 0 | 0 | 0 | 0 | 2 | 0 | 0 | 0 | 0 | 0 |
| 7371<br>8 | Malig neop connective and soft tissue head                   | 0 | 0 | 0 | 0 | 0 | 0 | 0 | 0 | 0 | 0 | 0 | 0 | 0 | 2 | 0 | 0 | 0 | 0 | 0 |
| 7374<br>4 | Malignant melanoma of ear and external auricular canal NOS   | 0 | 0 | 0 | 0 | 0 | 0 | 0 | 0 | 0 | 0 | 0 | 0 | 0 | 2 | 0 | 0 | 0 | 0 | 0 |
| 7376<br>0 | Malignant neoplasm of scalp or skin of neck NOS              | 0 | 0 | 0 | 0 | 0 | 0 | 0 | 0 | 0 | 0 | 0 | 0 | 0 | 2 | 0 | 0 | 0 | 0 | 0 |
| 7391<br>6 | [M]Epithelioid leiomyosarcoma                                | 0 | 0 | 0 | 0 | 0 | 0 | 0 | 0 | 0 | 0 | 0 | 0 | 0 | 2 | 0 | 0 | 0 | 0 | 0 |
| 7396<br>2 | Malignant neoplasm of upper lip, vermilion border            | 0 | 0 | 0 | 0 | 0 | 0 | 0 | 0 | 0 | 0 | 0 | 0 | 0 | 2 | 0 | 0 | 0 | 0 | 0 |
| 7398<br>8 | MALIGNANT NEOPLASM OF PERIPHERAL NERVE OF PELVIS             | 0 | 0 | 0 | 0 | 0 | 0 | 0 | 0 | 0 | 0 | 0 | 0 | 0 | 2 | 0 | 0 | 0 | 0 | 0 |
| 7399<br>2 | MALIGNANT NEOPLASM OF CORNEA                                 | 0 | 0 | 0 | 0 | 0 | 0 | 0 | 0 | 0 | 0 | 0 | 0 | 0 | 2 | 0 | 0 | 0 | 0 | 0 |
| 7489<br>6 | MALIGNANT NEOPLASM OF EXTRAHEPATIC BILE DUCTS NOS            | 0 | 0 | 0 | 0 | 0 | 0 | 0 | 0 | 0 | 0 | 0 | 0 | 0 | 2 | 0 | 0 | 0 | 0 | 0 |
| 8604<br>6 | Malignant neoplasm of peripheral nerve of abdomen            | 0 | 0 | 0 | 0 | 0 | 0 | 0 | 0 | 0 | 0 | 0 | 0 | 0 | 2 | 0 | 0 | 0 | 0 | 0 |
| 8681<br>2 | Malignant neoplasm of phalanges of hand                      | 0 | 0 | 0 | 0 | 0 | 0 | 0 | 0 | 0 | 0 | 0 | 0 | 0 | 2 | 0 | 0 | 0 | 0 | 0 |
| 8682<br>0 | [M]MESOTHELIOMA, BIPHASIC TYPE, MALIGNANT                    | 0 | 0 | 0 | 0 | 0 | 0 | 0 | 0 | 0 | 0 | 0 | 0 | 0 | 2 | 0 | 0 | 0 | 0 | 0 |
| 8699<br>6 | MALIGNANT NEOPLASM OF CONNECTIVE TISSUE OF ORBIT             | 0 | 0 | 0 | 0 | 0 | 0 | 0 | 0 | 0 | 0 | 0 | 0 | 0 | 2 | 0 | 0 | 0 | 0 | 0 |
| 8699<br>7 | [X]MALIGNANT NEOPLASM/ILL-DEFINED SITES WITHIN RESP SYSTEM   | 0 | 0 | 0 | 0 | 0 | 0 | 0 | 0 | 0 | 0 | 0 | 0 | 0 | 2 | 0 | 0 | 0 | 0 | 0 |
| 8700<br>3 | [M]MESENCHYMOMA, MALIGNANT                                   | 0 | 0 | 0 | 0 | 0 | 0 | 0 | 0 | 0 | 0 | 0 | 0 | 0 | 2 | 0 | 0 | 0 | 0 | 0 |
| 8711<br>3 | MALIGNANT NEOPLASM-PLURIGLANDULAR INVOLVEMENT,UNSPECIFIED    | 0 | 0 | 0 | 0 | 0 | 0 | 0 | 0 | 0 | 0 | 0 | 0 | 0 | 2 | 0 | 0 | 0 | 0 | 0 |
| 8814<br>4 | Malignant neoplasm of other specified part of nervous system | 0 | 0 | 0 | 0 | 0 | 0 | 0 | 0 | 0 | 0 | 0 | 0 | 0 | 2 | 0 | 0 | 0 | 0 | 0 |
| 8836<br>2 | Malignant neoplasm of other specified hypopharyngeal site    | 0 | 0 | 0 | 0 | 0 | 0 | 0 | 0 | 0 | 0 | 0 | 0 | 0 | 2 | 0 | 0 | 0 | 0 | 0 |
| 8925<br>8 | Malignant neoplasm of peripheral nerve of low limb, incl hip | 0 | 0 | 0 | 0 | 0 | 0 | 0 | 0 | 0 | 0 | 0 | 0 | 0 | 2 | 0 | 0 | 0 | 0 | 0 |
| 8959<br>3 | Malignant neoplasm of intrahepatic biliary passages          | 0 | 0 | 0 | 0 | 0 | 0 | 0 | 0 | 0 | 0 | 0 | 0 | 0 | 2 | 0 | 0 | 0 | 0 | 0 |
| 8990<br>9 | MALIGNANT NEOPLASM OF LOWER LIP, MUCOSA                      | 0 | 0 | 0 | 0 | 0 | 0 | 0 | 0 | 0 | 0 | 0 | 0 | 0 | 2 | 0 | 0 | 0 | 0 | 0 |
| 8991<br>6 | Malignant neoplasm of presacral region                       | 0 | 0 | 0 | 0 | 0 | 0 | 0 | 0 | 0 | 0 | 0 | 0 | 0 | 2 | 0 | 0 | 0 | 0 | 0 |

|       |                                                              |   |   |   |   |   |   |   |   |   |   |   |   |   |   |   |   |   |   |   |
|-------|--------------------------------------------------------------|---|---|---|---|---|---|---|---|---|---|---|---|---|---|---|---|---|---|---|
| 90124 | MALIGNANT NEOPLASM OF POSTERIOR WALL OF OROPHARYNX           | 0 | 0 | 0 | 0 | 0 | 0 | 0 | 0 | 0 | 0 | 0 | 0 | 0 | 2 | 0 | 0 | 0 | 0 | 0 |
| 90290 | Malignant neoplasm of mesentery                              | 0 | 0 | 0 | 0 | 0 | 0 | 0 | 0 | 0 | 0 | 0 | 0 | 0 | 2 | 0 | 0 | 0 | 0 | 0 |
| 90546 | MALIG NEOP CONNECTIVE AND SOFT TISSUE HIP AND LEG NOS        | 0 | 0 | 0 | 0 | 0 | 0 | 0 | 0 | 0 | 0 | 0 | 0 | 0 | 2 | 0 | 0 | 0 | 0 | 0 |
| 90610 | MALIGNANT NEOPLASM OF UPPER LIP, ORAL ASPECT                 | 0 | 0 | 0 | 0 | 0 | 0 | 0 | 0 | 0 | 0 | 0 | 0 | 0 | 2 | 0 | 0 | 0 | 0 | 0 |
| 90659 | MALIGNANT NEOPLASM OF OTHER SPECIFIED ENDOCRINE GLAND        | 0 | 0 | 0 | 0 | 0 | 0 | 0 | 0 | 0 | 0 | 0 | 0 | 0 | 2 | 0 | 0 | 0 | 0 | 0 |
| 91035 | Malignant neoplasm of fixed part of tongue NOS               | 0 | 0 | 0 | 0 | 0 | 0 | 0 | 0 | 0 | 0 | 0 | 0 | 0 | 2 | 0 | 0 | 0 | 0 | 0 |
| 91037 | MALIGNANT NEOPLASM OF OTHER SPECIFIED SITE OF OROPHARYNX NOS | 0 | 0 | 0 | 0 | 0 | 0 | 0 | 0 | 0 | 0 | 0 | 0 | 0 | 2 | 0 | 0 | 0 | 0 | 0 |
| 91240 | Malignant neoplasm of pons                                   | 0 | 0 | 0 | 0 | 0 | 0 | 0 | 0 | 0 | 0 | 0 | 0 | 0 | 2 | 0 | 0 | 0 | 0 | 0 |
| 91457 | [X]Malignant neoplasm/connective + soft tissue,unspecified   | 0 | 0 | 0 | 0 | 0 | 0 | 0 | 0 | 0 | 0 | 0 | 0 | 0 | 2 | 0 | 0 | 0 | 0 | 0 |
| 91509 | Malignant neoplasm of descended testis NOS                   | 0 | 0 | 0 | 0 | 0 | 0 | 0 | 0 | 0 | 0 | 0 | 0 | 0 | 2 | 0 | 0 | 0 | 0 | 0 |
| 91586 | Malignant neoplasm of connective and soft tissue of finger   | 0 | 0 | 0 | 0 | 0 | 0 | 0 | 0 | 0 | 0 | 0 | 0 | 0 | 2 | 0 | 0 | 0 | 0 | 0 |
| 91843 | MALIGNANT NEOPLASM OF LOWER LIP, FRENULUM                    | 0 | 0 | 0 | 0 | 0 | 0 | 0 | 0 | 0 | 0 | 0 | 0 | 0 | 2 | 0 | 0 | 0 | 0 | 0 |
| 91895 | MALIGNANT NEOPLASM OF GLOSSEOPIGLOTTIC FOLD                  | 0 | 0 | 0 | 0 | 0 | 0 | 0 | 0 | 0 | 0 | 0 | 0 | 0 | 2 | 0 | 0 | 0 | 0 | 0 |
| 91896 | [X]MAL NEOPLASM/CONNECTIVE+SOFT TISSUE OF TRUNK,UNSPECIFIED  | 0 | 0 | 0 | 0 | 0 | 0 | 0 | 0 | 0 | 0 | 0 | 0 | 0 | 2 | 0 | 0 | 0 | 0 | 0 |
| 92293 | [M]SPINDLE CELL MELANOMA, TYPE B                             | 0 | 0 | 0 | 0 | 0 | 0 | 0 | 0 | 0 | 0 | 0 | 0 | 0 | 2 | 0 | 0 | 0 | 0 | 0 |
| 92329 | MALIGNANT NEOPLASM OF OTHER MALE GENITAL ORGAN NOS           | 0 | 0 | 0 | 0 | 0 | 0 | 0 | 0 | 0 | 0 | 0 | 0 | 0 | 2 | 0 | 0 | 0 | 0 | 0 |
| 92371 | Malignant neoplasm of radius                                 | 0 | 0 | 0 | 0 | 0 | 0 | 0 | 0 | 0 | 0 | 0 | 0 | 0 | 2 | 0 | 0 | 0 | 0 | 0 |
| 92382 | Malignant neoplasm of fourth metatarsal bone                 | 0 | 0 | 0 | 0 | 0 | 0 | 0 | 0 | 0 | 0 | 0 | 0 | 0 | 2 | 0 | 0 | 0 | 0 | 0 |
| 92720 | Malignant neoplasm of posterior mediastinum                  | 0 | 0 | 0 | 0 | 0 | 0 | 0 | 0 | 0 | 0 | 0 | 0 | 0 | 2 | 0 | 0 | 0 | 0 | 0 |
| 93175 | [M]INTRAOSSEOUS CARCINOMA                                    | 0 | 0 | 0 | 0 | 0 | 0 | 0 | 0 | 0 | 0 | 0 | 0 | 0 | 2 | 0 | 0 | 0 | 0 | 0 |
| 93218 | MALIGNANT NEOPLASM OF GUM NOS                                | 0 | 0 | 0 | 0 | 0 | 0 | 0 | 0 | 0 | 0 | 0 | 0 | 0 | 2 | 0 | 0 | 0 | 0 | 0 |
| 93352 | Squamous cell carcinoma of skin                              | 0 | 0 | 0 | 0 | 0 | 0 | 0 | 0 | 0 | 0 | 0 | 0 | 0 | 2 | 0 | 0 | 0 | 0 | 0 |
| 93402 | Excision biopsy of basal cell carcinoma                      | 0 | 0 | 0 | 0 | 0 | 0 | 0 | 0 | 0 | 0 | 0 | 0 | 0 | 2 | 0 | 0 | 0 | 0 | 0 |
| 93478 | MALIGNANT NEOPLASM, OVERLAPPING LESION OF COLON              | 0 | 0 | 0 | 0 | 0 | 0 | 0 | 0 | 0 | 0 | 0 | 0 | 0 | 2 | 0 | 0 | 0 | 0 | 0 |



|      |                                                              |   |   |   |   |   |   |   |   |   |   |   |   |   |   |   |   |   |   |
|------|--------------------------------------------------------------|---|---|---|---|---|---|---|---|---|---|---|---|---|---|---|---|---|---|
| 9502 |                                                              | 0 |   |   |   |   |   |   |   |   |   |   |   |   |   |   |   |   |   |
| 4    | [M]Infantile fibrosarcoma                                    |   | 0 | 0 | 0 | 0 | 0 | 0 | 0 | 0 | 0 | 0 | 0 | 0 | 2 | 0 | 0 | 0 | 0 |
| 9505 | Malignant neoplasm of ectopic site of female breast          | 0 |   |   |   |   |   |   |   |   |   |   |   |   | 2 | 0 | 0 | 0 | 0 |
| 7    |                                                              |   | 0 | 0 | 0 | 0 | 0 | 0 | 0 | 0 | 0 | 0 | 0 | 0 | 2 | 0 | 0 | 0 | 0 |
| 9515 |                                                              | 0 |   |   |   |   |   |   |   |   |   |   |   |   |   |   |   |   |   |
| 0    | [M]Serous surface papillary carcinoma                        |   | 0 | 0 | 0 | 0 | 0 | 0 | 0 | 0 | 0 | 0 | 0 | 0 | 2 | 0 | 0 | 0 | 0 |
| 9518 |                                                              | 0 |   |   |   |   |   |   |   |   |   |   |   |   |   |   |   |   |   |
| 2    | MALIGNANT NEOPLASM OF TALUS                                  |   | 0 | 0 | 0 | 0 | 0 | 0 | 0 | 0 | 0 | 0 | 0 | 0 | 2 | 0 | 0 | 0 | 0 |
| 9532 | Malignant neoplasm of ectopic site of male breast            | 0 |   |   |   |   |   |   |   |   |   |   |   |   |   |   |   |   |   |
| 3    |                                                              |   | 0 | 0 | 0 | 0 | 0 | 0 | 0 | 0 | 0 | 0 | 0 | 0 | 2 | 0 | 0 | 0 | 0 |
| 9537 |                                                              | 0 |   |   |   |   |   |   |   |   |   |   |   |   |   |   |   |   |   |
| 3    | [M]LEYDIG CELL TUMOUR, MALIGNANT                             |   | 0 | 0 | 0 | 0 | 0 | 0 | 0 | 0 | 0 | 0 | 0 | 0 | 2 | 0 | 0 | 0 | 0 |
| 9542 | Malignant neoplasm of other specified female genital organ   | 0 |   |   |   |   |   |   |   |   |   |   |   |   |   |   |   |   |   |
| 1    |                                                              |   | 0 | 0 | 0 | 0 | 0 | 0 | 0 | 0 | 0 | 0 | 0 | 0 | 2 | 0 | 0 | 0 | 0 |
| 9542 | Malignant neoplasm of posterior wall of nasopharynx          | 0 |   |   |   |   |   |   |   |   |   |   |   |   |   |   |   |   |   |
| 9    |                                                              |   | 0 | 0 | 0 | 0 | 0 | 0 | 0 | 0 | 0 | 0 | 0 | 0 | 2 | 0 | 0 | 0 | 0 |
| 9545 |                                                              | 0 |   |   |   |   |   |   |   |   |   |   |   |   |   |   |   |   |   |
| 8    | MALIGNANT NEOPLASM OF NASAL BONE                             |   | 0 | 0 | 0 | 0 | 0 | 0 | 0 | 0 | 0 | 0 | 0 | 0 | 2 | 0 | 0 | 0 | 0 |
| 9548 | MALIGNANT NEOPLASM OF LOWER LIP, LIPSTICK AREA               | 0 |   |   |   |   |   |   |   |   |   |   |   |   |   |   |   |   |   |
| 0    |                                                              |   | 0 | 0 | 0 | 0 | 0 | 0 | 0 | 0 | 0 | 0 | 0 | 0 | 2 | 0 | 0 | 0 | 0 |
| 9550 |                                                              | 0 |   |   |   |   |   |   |   |   |   |   |   |   |   |   |   |   |   |
| 5    | Malignant neoplasm of cervical stump                         |   | 0 | 0 | 0 | 0 | 0 | 0 | 0 | 0 | 0 | 0 | 0 | 0 | 2 | 0 | 0 | 0 | 0 |
| 9560 |                                                              | 0 |   |   |   |   |   |   |   |   |   |   |   |   |   |   |   |   |   |
| 9    | [M]INSULINOMA, MALIGNANT                                     |   | 0 | 0 | 0 | 0 | 0 | 0 | 0 | 0 | 0 | 0 | 0 | 0 | 2 | 0 | 0 | 0 | 0 |
| 9562 |                                                              | 0 |   |   |   |   |   |   |   |   |   |   |   |   |   |   |   |   |   |
| 9    | MALIGNANT MELANOMA OF PERINEUM                               |   | 0 | 0 | 0 | 0 | 0 | 0 | 0 | 0 | 0 | 0 | 0 | 0 | 2 | 0 | 0 | 0 | 0 |
| 9564 |                                                              | 0 |   |   |   |   |   |   |   |   |   |   |   |   |   |   |   |   |   |
| 4    | MALIGNANT NEOPLASM OF HEART                                  |   | 0 | 0 | 0 | 0 | 0 | 0 | 0 | 0 | 0 | 0 | 0 | 0 | 2 | 0 | 0 | 0 | 0 |
| 9567 | [X]Malignant neoplasm of peritoneum, unspecified             | 0 |   |   |   |   |   |   |   |   |   |   |   |   |   |   |   |   |   |
| 1    |                                                              |   | 0 | 0 | 0 | 0 | 0 | 0 | 0 | 0 | 0 | 0 | 0 | 0 | 2 | 0 | 0 | 0 | 0 |
| 9577 |                                                              | 0 |   |   |   |   |   |   |   |   |   |   |   |   |   |   |   |   |   |
| 2    | Malignant neoplasm of upper buccal sulcus                    |   | 0 | 0 | 0 | 0 | 0 | 0 | 0 | 0 | 0 | 0 | 0 | 0 | 2 | 0 | 0 | 0 | 0 |
| 9578 | Malignant neoplasm of specified site of pancreas NOS         | 0 |   |   |   |   |   |   |   |   |   |   |   |   |   |   |   |   |   |
| 3    |                                                              |   | 0 | 0 | 0 | 0 | 0 | 0 | 0 | 0 | 0 | 0 | 0 | 0 | 2 | 0 | 0 | 0 | 0 |
| 9581 |                                                              | 0 |   |   |   |   |   |   |   |   |   |   |   |   |   |   |   |   |   |
| 8    | [M]PARAGANGLIOMA, MALIGNANT                                  |   | 0 | 0 | 0 | 0 | 0 | 0 | 0 | 0 | 0 | 0 | 0 | 0 | 2 | 0 | 0 | 0 | 0 |
| 9600 | MALIGNANT NEOPLASM OF JUNCTION OF HARD AND SOFT PALATE       | 0 |   |   |   |   |   |   |   |   |   |   |   |   |   |   |   |   |   |
| 3    |                                                              |   | 0 | 0 | 0 | 0 | 0 | 0 | 0 | 0 | 0 | 0 | 0 | 0 | 2 | 0 | 0 | 0 | 0 |
| 9609 |                                                              | 0 |   |   |   |   |   |   |   |   |   |   |   |   |   |   |   |   |   |
| 4    | Siewert type III adenocarcinoma                              |   | 0 | 0 | 0 | 0 | 0 | 0 | 0 | 0 | 0 | 0 | 0 | 0 | 2 | 0 | 0 | 0 | 0 |
| 9622 | [X]Malignant neoplasm/overlap lesion/other+ill-defined sites | 0 |   |   |   |   |   |   |   |   |   |   |   |   |   |   |   |   |   |
| 6    |                                                              |   | 0 | 0 | 0 | 0 | 0 | 0 | 0 | 0 | 0 | 0 | 0 | 0 | 2 | 0 | 0 | 0 | 0 |
| 9623 |                                                              | 0 |   |   |   |   |   |   |   |   |   |   |   |   |   |   |   |   |   |
| 1    | [M]FIBROXANTHOMA, MALIGNANT                                  |   | 0 | 0 | 0 | 0 | 0 | 0 | 0 | 0 | 0 | 0 | 0 | 0 | 2 | 0 | 0 | 0 | 0 |
| 9642 | Malignant neoplasm of undescended testis NOS                 | 0 |   |   |   |   |   |   |   |   |   |   |   |   |   |   |   |   |   |
| 9    |                                                              |   | 0 | 0 | 0 | 0 | 0 | 0 | 0 | 0 | 0 | 0 | 0 | 0 | 2 | 0 | 0 | 0 | 0 |
| 9644 |                                                              | 0 |   |   |   |   |   |   |   |   |   |   |   |   |   |   |   |   |   |
| 5    | Malignant neoplasm of turbinate                              |   | 0 | 0 | 0 | 0 | 0 | 0 | 0 | 0 | 0 | 0 | 0 | 0 | 2 | 0 | 0 | 0 | 0 |

|           |                                                            |   |   |   |   |   |   |   |   |   |   |   |   |   |   |   |   |   |   |
|-----------|------------------------------------------------------------|---|---|---|---|---|---|---|---|---|---|---|---|---|---|---|---|---|---|
| 9658<br>5 | OVERLAPPING MALIGNANT MELANOMA OF SKIN                     | 0 | 0 | 0 | 0 | 0 | 0 | 0 | 0 | 0 | 0 | 0 | 0 | 0 | 2 | 0 | 0 | 0 | 0 |
| 9663<br>5 | Malignant neoplasm of ectopic pancreatic tissue            | 0 | 0 | 0 | 0 | 0 | 0 | 0 | 0 | 0 | 0 | 0 | 0 | 0 | 2 | 0 | 0 | 0 | 0 |
| 9678<br>2 | MALIGNANT NEOPLASM OF LOWER LIP, INNER ASPECT NOS          | 0 | 0 | 0 | 0 | 0 | 0 | 0 | 0 | 0 | 0 | 0 | 0 | 0 | 2 | 0 | 0 | 0 | 0 |
| 9678<br>3 | MALIGNANT NEOPLASM OF COMMISSURE OF LIP                    | 0 | 0 | 0 | 0 | 0 | 0 | 0 | 0 | 0 | 0 | 0 | 0 | 0 | 2 | 0 | 0 | 0 | 0 |
| 9679<br>8 | [M]Meningothelial sarcoma                                  | 0 | 0 | 0 | 0 | 0 | 0 | 0 | 0 | 0 | 0 | 0 | 0 | 0 | 2 | 0 | 0 | 0 | 0 |
| 9680<br>2 | Malignant neoplasm of posterior wall of stomach NEC        | 0 | 0 | 0 | 0 | 0 | 0 | 0 | 0 | 0 | 0 | 0 | 0 | 0 | 2 | 0 | 0 | 0 | 0 |
| 9686<br>9 | MALIGNANT NEOPLASM OF POSTERIOR WALL OF NASOPHARYNX NOS    | 0 | 0 | 0 | 0 | 0 | 0 | 0 | 0 | 0 | 0 | 0 | 0 | 0 | 2 | 0 | 0 | 0 | 0 |
| 9697<br>1 | MALIG NEOP OTHER SITE NASAL CAVITY, MIDDLE EAR AND SINUSES | 0 | 0 | 0 | 0 | 0 | 0 | 0 | 0 | 0 | 0 | 0 | 0 | 0 | 2 | 0 | 0 | 0 | 0 |
| 9733<br>2 | MALIGNANT NEOPLASM OF LARYNGEAL CARTILAGE NOS              | 0 | 0 | 0 | 0 | 0 | 0 | 0 | 0 | 0 | 0 | 0 | 0 | 0 | 2 | 0 | 0 | 0 | 0 |
| 9746<br>3 | [M]GIANT CELL SARCOMA (EXCEPT OF BONE)                     | 0 | 0 | 0 | 0 | 0 | 0 | 0 | 0 | 0 | 0 | 0 | 0 | 0 | 2 | 0 | 0 | 0 | 0 |
| 9749<br>9 | Siewert type II adenocarcinoma                             | 0 | 0 | 0 | 0 | 0 | 0 | 0 | 0 | 0 | 0 | 0 | 0 | 0 | 2 | 0 | 0 | 0 | 0 |
| 9753<br>0 | MALIGNANT NEOPLASM OF LOWER BUCCAL SULCUS                  | 0 | 0 | 0 | 0 | 0 | 0 | 0 | 0 | 0 | 0 | 0 | 0 | 0 | 2 | 0 | 0 | 0 | 0 |
| 9754<br>7 | MALIGNANT NEOPLASM OF INTRATHORACIC SITE NOS               | 0 | 0 | 0 | 0 | 0 | 0 | 0 | 0 | 0 | 0 | 0 | 0 | 0 | 2 | 0 | 0 | 0 | 0 |
| 9759<br>3 | [M]AMELOBLASTOMA, MALIGNANT                                | 0 | 0 | 0 | 0 | 0 | 0 | 0 | 0 | 0 | 0 | 0 | 0 | 0 | 2 | 0 | 0 | 0 | 0 |
| 9787<br>5 | Malignant neoplasm                                         | 0 | 0 | 0 | 0 | 0 | 0 | 0 | 0 | 0 | 0 | 0 | 0 | 0 | 2 | 0 | 0 | 0 | 0 |
| 9796<br>1 | [M]NEUROEPITHELIOMA NOS                                    | 0 | 0 | 0 | 0 | 0 | 0 | 0 | 0 | 0 | 0 | 0 | 0 | 0 | 2 | 0 | 0 | 0 | 0 |
| 9799<br>6 | Malignant neoplasm of other site of uterine adnexa         | 0 | 0 | 0 | 0 | 0 | 0 | 0 | 0 | 0 | 0 | 0 | 0 | 0 | 2 | 0 | 0 | 0 | 0 |
| 9810<br>4 | MALIGNANT NEOPLASM OF OTHER SPECIFIED PLEURA               | 0 | 0 | 0 | 0 | 0 | 0 | 0 | 0 | 0 | 0 | 0 | 0 | 0 | 2 | 0 | 0 | 0 | 0 |
| 9814<br>2 | Siewert type I adenocarcinoma                              | 0 | 0 | 0 | 0 | 0 | 0 | 0 | 0 | 0 | 0 | 0 | 0 | 0 | 2 | 0 | 0 | 0 | 0 |
| 9832<br>2 | [M]HAEMANGIOENDOTHELIOMA, MALIGNANT                        | 0 | 0 | 0 | 0 | 0 | 0 | 0 | 0 | 0 | 0 | 0 | 0 | 0 | 2 | 0 | 0 | 0 | 0 |
| 9836<br>1 | [X]KAPOSI'S SARCOMA OF OTHER SITES                         | 0 | 0 | 0 | 0 | 0 | 0 | 0 | 0 | 0 | 0 | 0 | 0 | 0 | 2 | 0 | 0 | 0 | 0 |
| 9840<br>8 | MALIG NEOP OF CONNECTIVE AND SOFT TISSUE OF THORAX NOS     | 0 | 0 | 0 | 0 | 0 | 0 | 0 | 0 | 0 | 0 | 0 | 0 | 0 | 2 | 0 | 0 | 0 | 0 |
| 9848<br>3 | [M]ODONTOGENIC FIBROSARCOMA                                | 0 | 0 | 0 | 0 | 0 | 0 | 0 | 0 | 0 | 0 | 0 | 0 | 0 | 2 | 0 | 0 | 0 | 0 |
| 9850<br>0 | Malignant neoplasm of upper lip                            | 0 | 0 | 0 | 0 | 0 | 0 | 0 | 0 | 0 | 0 | 0 | 0 | 0 | 2 | 0 | 0 | 0 | 0 |



|           |                                                              |   |   |   |   |   |   |   |   |   |   |   |   |   |   |   |   |   |   |   |
|-----------|--------------------------------------------------------------|---|---|---|---|---|---|---|---|---|---|---|---|---|---|---|---|---|---|---|
| 9853<br>7 | MALIGNANT NEOPLASM OF TYMPANIC CAVITY                        | 0 | 0 | 0 | 0 | 0 | 0 | 0 | 0 | 0 | 0 | 0 | 0 | 0 | 2 | 0 | 0 | 0 | 0 | 0 |
| 9855<br>9 | [M]Chondroblastoma, malignant                                | 0 | 0 | 0 | 0 | 0 | 0 | 0 | 0 | 0 | 0 | 0 | 0 | 0 | 2 | 0 | 0 | 0 | 0 | 0 |
| 9869<br>6 | [M]Papillary cystadenoma, borderline malignancy              | 0 | 0 | 0 | 0 | 0 | 0 | 0 | 0 | 0 | 0 | 0 | 0 | 0 | 2 | 0 | 0 | 0 | 0 | 0 |
| 9874<br>0 | MALIGNANT NEOPLASM OF UPPER LIP, VERMILION BORDER NOS        | 0 | 0 | 0 | 0 | 0 | 0 | 0 | 0 | 0 | 0 | 0 | 0 | 0 | 2 | 0 | 0 | 0 | 0 | 0 |
| 9878<br>1 | [M]TRABECULAR ADENOCARCINOMA                                 | 0 | 0 | 0 | 0 | 0 | 0 | 0 | 0 | 0 | 0 | 0 | 0 | 0 | 2 | 0 | 0 | 0 | 0 | 0 |
| 9879<br>7 | [M]EMBRYONAL SARCOMA                                         | 0 | 0 | 0 | 0 | 0 | 0 | 0 | 0 | 0 | 0 | 0 | 0 | 0 | 2 | 0 | 0 | 0 | 0 | 0 |
| 9880<br>0 | [M]PILOID ASTROCYTOMA                                        | 0 | 0 | 0 | 0 | 0 | 0 | 0 | 0 | 0 | 0 | 0 | 0 | 0 | 2 | 0 | 0 | 0 | 0 | 0 |
| 9881<br>3 | Malig neop eyeball excl conjunctiva                          | 0 | 0 | 0 | 0 | 0 | 0 | 0 | 0 | 0 | 0 | 0 | 0 | 0 | 2 | 0 | 0 | 0 | 0 | 0 |
| 9882<br>5 | [M]MIXED ISLET CELL AND EXOCRINE ADENOCARCINOMA              | 0 | 0 | 0 | 0 | 0 | 0 | 0 | 0 | 0 | 0 | 0 | 0 | 0 | 2 | 0 | 0 | 0 | 0 | 0 |
| 9888<br>3 | [M]Medullary carcinoma with lymphoid stroma                  | 0 | 0 | 0 | 0 | 0 | 0 | 0 | 0 | 0 | 0 | 0 | 0 | 0 | 2 | 0 | 0 | 0 | 0 | 0 |
| 9891<br>1 | MALIGNANT NEOPLASM OF NASAL CONCHAE                          | 0 | 0 | 0 | 0 | 0 | 0 | 0 | 0 | 0 | 0 | 0 | 0 | 0 | 2 | 0 | 0 | 0 | 0 | 0 |
| 9900<br>1 | MALIGNANT NEOPLASM OF UPPER LIP, FRENULUM                    | 0 | 0 | 0 | 0 | 0 | 0 | 0 | 0 | 0 | 0 | 0 | 0 | 0 | 2 | 0 | 0 | 0 | 0 | 0 |
| 9909<br>6 | [X]Malignant neopl/overlapping les/resp+intrathoracic organs | 0 | 0 | 0 | 0 | 0 | 0 | 0 | 0 | 0 | 0 | 0 | 0 | 0 | 2 | 0 | 0 | 0 | 0 | 0 |
| 9918<br>5 | Malignant neoplasm of glossopalatine fold                    | 0 | 0 | 0 | 0 | 0 | 0 | 0 | 0 | 0 | 0 | 0 | 0 | 0 | 2 | 0 | 0 | 0 | 0 | 0 |
| 9925<br>7 | MALIGNANT MELANOMA OF SCALP AND NECK NOS                     | 0 | 0 | 0 | 0 | 0 | 0 | 0 | 0 | 0 | 0 | 0 | 0 | 0 | 2 | 0 | 0 | 0 | 0 | 0 |
| 9938<br>6 | Malignant neoplasm posterior margin nasal septum and choanae | 0 | 0 | 0 | 0 | 0 | 0 | 0 | 0 | 0 | 0 | 0 | 0 | 0 | 2 | 0 | 0 | 0 | 0 | 0 |
| 9949<br>1 | [M]Neuroepitheliomatous neoplasm NOS                         | 0 | 0 | 0 | 0 | 0 | 0 | 0 | 0 | 0 | 0 | 0 | 0 | 0 | 2 | 0 | 0 | 0 | 0 | 0 |
| 9949<br>3 | MALIGNANT NEOPLASM OF UPPER LIP, INNER ASPECT                | 0 | 0 | 0 | 0 | 0 | 0 | 0 | 0 | 0 | 0 | 0 | 0 | 0 | 2 | 0 | 0 | 0 | 0 | 0 |
| 9957<br>2 | MALIGNANT NEOPLASM OF CONNECTIVE AND SOFT TISSUE OF TOE      | 0 | 0 | 0 | 0 | 0 | 0 | 0 | 0 | 0 | 0 | 0 | 0 | 0 | 2 | 0 | 0 | 0 | 0 | 0 |
| 9962<br>1 | Malignant neoplasm of cranial nerves                         | 0 | 0 | 0 | 0 | 0 | 0 | 0 | 0 | 0 | 0 | 0 | 0 | 0 | 2 | 0 | 0 | 0 | 0 | 0 |
| 9966<br>5 | [M]Juxtacortical osteogenic sarcoma                          | 0 | 0 | 0 | 0 | 0 | 0 | 0 | 0 | 0 | 0 | 0 | 0 | 0 | 2 | 0 | 0 | 0 | 0 | 0 |
| 9979<br>7 | [M]MALIGNANT GIANT CELL TUMOUR OF SOFT PARTS                 | 0 | 0 | 0 | 0 | 0 | 0 | 0 | 0 | 0 | 0 | 0 | 0 | 0 | 2 | 0 | 0 | 0 | 0 | 0 |
| 9989<br>6 | MALIGNANT NEOPLASM OF OTHER SPECIFIED SITE SMALL INTESTINE   | 0 | 0 | 0 | 0 | 0 | 0 | 0 | 0 | 0 | 0 | 0 | 0 | 0 | 2 | 0 | 0 | 0 | 0 | 0 |
| 9991<br>3 | MALIGNANT NEOPLASM OF GLOBUS PALLIDUS                        | 0 | 0 | 0 | 0 | 0 | 0 | 0 | 0 | 0 | 0 | 0 | 0 | 0 | 2 | 0 | 0 | 0 | 0 | 0 |

|            |                                                              |   |   |   |   |   |   |   |   |   |   |   |   |   |   |   |   |   |   |   |
|------------|--------------------------------------------------------------|---|---|---|---|---|---|---|---|---|---|---|---|---|---|---|---|---|---|---|
| 9993<br>1  | [V]Personal history of malignant neoplasm of tongue          | 0 | 0 | 0 | 0 | 0 | 0 | 0 | 0 | 0 | 0 | 0 | 0 | 0 | 2 | 0 | 0 | 0 | 0 | 0 |
| 1000<br>02 | MALIGNANT NEOPLASM OF TONSILLAR FOSSA NOS                    | 0 | 0 | 0 | 0 | 0 | 0 | 0 | 0 | 0 | 0 | 0 | 0 | 0 | 2 | 0 | 0 | 0 | 0 | 0 |
| 1000<br>83 | NEUROBLASTOMA                                                | 0 | 0 | 0 | 0 | 0 | 0 | 0 | 0 | 0 | 0 | 0 | 0 | 0 | 2 | 0 | 0 | 0 | 0 | 0 |
| 1001<br>11 | [M]SCHNEIDERIAN CARCINOMA                                    | 0 | 0 | 0 | 0 | 0 | 0 | 0 | 0 | 0 | 0 | 0 | 0 | 0 | 2 | 0 | 0 | 0 | 0 | 0 |
| 1001<br>44 | Malignant neoplasm of lip, oral aspect                       | 0 | 0 | 0 | 0 | 0 | 0 | 0 | 0 | 0 | 0 | 0 | 0 | 0 | 2 | 0 | 0 | 0 | 0 | 0 |
| 1002<br>32 | Malig neop of other site of heart, thymus and mediastinum    | 0 | 0 | 0 | 0 | 0 | 0 | 0 | 0 | 0 | 0 | 0 | 0 | 0 | 2 | 0 | 0 | 0 | 0 | 0 |
| 1002<br>67 | [M]Adamantinoma, malignant                                   | 0 | 0 | 0 | 0 | 0 | 0 | 0 | 0 | 0 | 0 | 0 | 0 | 0 | 2 | 0 | 0 | 0 | 0 | 0 |
| 1003<br>71 | [M]Epithelial nephroblastoma                                 | 0 | 0 | 0 | 0 | 0 | 0 | 0 | 0 | 0 | 0 | 0 | 0 | 0 | 2 | 0 | 0 | 0 | 0 | 0 |
| 1005<br>84 | Malignant neoplasm of cardiac orifice of stomach             | 0 | 0 | 0 | 0 | 0 | 0 | 0 | 0 | 0 | 0 | 0 | 0 | 0 | 2 | 0 | 0 | 0 | 0 | 0 |
| 1005<br>90 | [M]Tumour embolus                                            | 0 | 0 | 0 | 0 | 0 | 0 | 0 | 0 | 0 | 0 | 0 | 0 | 0 | 2 | 0 | 0 | 0 | 0 | 0 |
| 1006<br>25 | [M]Carcinoid tumour, nonargentaffin, malignant               | 0 | 0 | 0 | 0 | 0 | 0 | 0 | 0 | 0 | 0 | 0 | 0 | 0 | 2 | 0 | 0 | 0 | 0 | 0 |
| 1007<br>21 | Malignant neoplasm of upper lip, inner aspect NOS            | 0 | 0 | 0 | 0 | 0 | 0 | 0 | 0 | 0 | 0 | 0 | 0 | 0 | 2 | 0 | 0 | 0 | 0 | 0 |
| 1007<br>33 | Malignant neoplasm of other part of brain NOS                | 0 | 0 | 0 | 0 | 0 | 0 | 0 | 0 | 0 | 0 | 0 | 0 | 0 | 2 | 0 | 0 | 0 | 0 | 0 |
| 1009<br>06 | Malignant neoplasm of lip, unspecified, external             | 0 | 0 | 0 | 0 | 0 | 0 | 0 | 0 | 0 | 0 | 0 | 0 | 0 | 2 | 0 | 0 | 0 | 0 | 0 |
| 1009<br>18 | MALIGNANT NEOPLASM OF ANTERIOR WALL OF NASOPHARYNX NOS       | 0 | 0 | 0 | 0 | 0 | 0 | 0 | 0 | 0 | 0 | 0 | 0 | 0 | 2 | 0 | 0 | 0 | 0 | 0 |
| 1010<br>86 | MALIGNANT NEOPLASM OF CRANIAL NERVES NOS                     | 0 | 0 | 0 | 0 | 0 | 0 | 0 | 0 | 0 | 0 | 0 | 0 | 0 | 2 | 0 | 0 | 0 | 0 | 0 |
| 1010<br>95 | [M]Grade 1 (Stage pTa) papillary urothelial/transit cell ca  | 0 | 0 | 0 | 0 | 0 | 0 | 0 | 0 | 0 | 0 | 0 | 0 | 0 | 2 | 0 | 0 | 0 | 0 | 0 |
| 1016<br>08 | Malignant neoplasm of ureteropelvic junction                 | 0 | 0 | 0 | 0 | 0 | 0 | 0 | 0 | 0 | 0 | 0 | 0 | 0 | 2 | 0 | 0 | 0 | 0 | 0 |
| 1016<br>68 | [X]Malignant neoplasm/peripheral nerves of trunk,unspecified | 0 | 0 | 0 | 0 | 0 | 0 | 0 | 0 | 0 | 0 | 0 | 0 | 0 | 2 | 0 | 0 | 0 | 0 | 0 |
| 1017<br>00 | HEREDITARY NONPOLYPOSIS COLON CANCER                         | 0 | 0 | 0 | 0 | 0 | 0 | 0 | 0 | 0 | 0 | 0 | 0 | 0 | 2 | 0 | 0 | 0 | 0 | 0 |
| 1017<br>07 | MALIGNANT NEOPLASM OF LOWER LIP, VERMILION BORDER NOS        | 0 | 0 | 0 | 0 | 0 | 0 | 0 | 0 | 0 | 0 | 0 | 0 | 0 | 2 | 0 | 0 | 0 | 0 | 0 |
| 1017<br>53 | MALIGNANT NEOPLASM OF OTHER SITES OF GUM                     | 0 | 0 | 0 | 0 | 0 | 0 | 0 | 0 | 0 | 0 | 0 | 0 | 0 | 2 | 0 | 0 | 0 | 0 | 0 |
| 1017<br>78 | Malignant neoplasm of broad ligament                         | 0 | 0 | 0 | 0 | 0 | 0 | 0 | 0 | 0 | 0 | 0 | 0 | 0 | 2 | 0 | 0 | 0 | 0 | 0 |
| 1018<br>05 | Malignant neoplasm of lacrimal sac                           | 0 | 0 | 0 | 0 | 0 | 0 | 0 | 0 | 0 | 0 | 0 | 0 | 0 | 2 | 0 | 0 | 0 | 0 | 0 |

|            |                                                              |   |   |   |   |   |   |   |   |   |   |   |   |   |   |   |   |   |   |
|------------|--------------------------------------------------------------|---|---|---|---|---|---|---|---|---|---|---|---|---|---|---|---|---|---|
| 1018<br>85 | Mesothelioma of pericardium                                  | 0 | 0 | 0 | 0 | 0 | 0 | 0 | 0 | 0 | 0 | 0 | 0 | 2 | 0 | 0 | 0 | 0 | 0 |
| 1019<br>07 | Overlapping malign lesion of retroperitoneum and peritoneum  | 0 | 0 | 0 | 0 | 0 | 0 | 0 | 0 | 0 | 0 | 0 | 0 | 2 | 0 | 0 | 0 | 0 | 0 |
| 1019<br>23 | [M]FIBROLIPOSARCOMA                                          | 0 | 0 | 0 | 0 | 0 | 0 | 0 | 0 | 0 | 0 | 0 | 0 | 2 | 0 | 0 | 0 | 0 | 0 |
| 1019<br>78 | [M]Grade 3 (Stage pTa) papillary urothelial/transit cell ca  | 0 | 0 | 0 | 0 | 0 | 0 | 0 | 0 | 0 | 0 | 0 | 0 | 2 | 0 | 0 | 0 | 0 | 0 |
| 1019<br>88 | Malignant neoplasm of palatine tonsil                        | 0 | 0 | 0 | 0 | 0 | 0 | 0 | 0 | 0 | 0 | 0 | 0 | 2 | 0 | 0 | 0 | 0 | 0 |
| 1020<br>30 | [M]Complex epithelial neoplasm NOS                           | 0 | 0 | 0 | 0 | 0 | 0 | 0 | 0 | 0 | 0 | 0 | 0 | 2 | 0 | 0 | 0 | 0 | 0 |
| 1021<br>16 | CLARK MELANOMA LEVEL 4                                       | 0 | 0 | 0 | 0 | 0 | 0 | 0 | 0 | 0 | 0 | 0 | 0 | 2 | 0 | 0 | 0 | 0 | 0 |
| 1021<br>42 | MALIGNANT NEOPLASM OF ANTERIOR 2/3 OF TONGUE VENTRAL SURFACE | 0 | 0 | 0 | 0 | 0 | 0 | 0 | 0 | 0 | 0 | 0 | 0 | 2 | 0 | 0 | 0 | 0 | 0 |
| 1021<br>45 | Malignant melanoma of external auditory meatus               | 0 | 0 | 0 | 0 | 0 | 0 | 0 | 0 | 0 | 0 | 0 | 0 | 2 | 0 | 0 | 0 | 0 | 0 |
| 1021<br>51 | Malignant neoplasm of overlapping lesion of tonsil           | 0 | 0 | 0 | 0 | 0 | 0 | 0 | 0 | 0 | 0 | 0 | 0 | 2 | 0 | 0 | 0 | 0 | 0 |
| 1022<br>05 | Malignant neoplasm of lateral wall of nasopharynx NOS        | 0 | 0 | 0 | 0 | 0 | 0 | 0 | 0 | 0 | 0 | 0 | 0 | 2 | 0 | 0 | 0 | 0 | 0 |
| 1022<br>44 | [M]Grade 2 (Stage pTa) papillary urothelial/transit cell ca  | 0 | 0 | 0 | 0 | 0 | 0 | 0 | 0 | 0 | 0 | 0 | 0 | 2 | 0 | 0 | 0 | 0 | 0 |
| 1023<br>14 | H/O: prostate cancer                                         | 0 | 0 | 0 | 0 | 0 | 0 | 0 | 0 | 0 | 0 | 0 | 0 | 2 | 0 | 0 | 0 | 0 | 0 |
| 1023<br>56 | [M]Polyembryoma                                              | 0 | 0 | 0 | 0 | 0 | 0 | 0 | 0 | 0 | 0 | 0 | 0 | 2 | 0 | 0 | 0 | 0 | 0 |
| 1024<br>17 | [M]SUPERFICIAL BASAL CELL CARCINOMA                          | 0 | 0 | 0 | 0 | 0 | 0 | 0 | 0 | 0 | 0 | 0 | 0 | 2 | 0 | 0 | 0 | 0 | 0 |
| 1025<br>47 | [M]BASAL CELL CARCINOMA, NODULAR                             | 0 | 0 | 0 | 0 | 0 | 0 | 0 | 0 | 0 | 0 | 0 | 0 | 2 | 0 | 0 | 0 | 0 | 0 |
| 1025<br>93 | [M]Noninfiltrating intraductal papillary adenocarcinoma      | 0 | 0 | 0 | 0 | 0 | 0 | 0 | 0 | 0 | 0 | 0 | 0 | 2 | 0 | 0 | 0 | 0 | 0 |
| 1029<br>49 | Malignant neoplasm of connective and soft tissue of hip      | 0 | 0 | 0 | 0 | 0 | 0 | 0 | 0 | 0 | 0 | 0 | 0 | 2 | 0 | 0 | 0 | 0 | 0 |
| 1030<br>34 | [M]Endometrioid adenofibroma, malignant                      | 0 | 0 | 0 | 0 | 0 | 0 | 0 | 0 | 0 | 0 | 0 | 0 | 2 | 0 | 0 | 0 | 0 | 0 |
| 1030<br>47 | [M]Spongioblastoma NOS                                       | 0 | 0 | 0 | 0 | 0 | 0 | 0 | 0 | 0 | 0 | 0 | 0 | 2 | 0 | 0 | 0 | 0 | 0 |
| 1030<br>66 | [M]PIGMENTED BASAL CELL CARCINOMA                            | 0 | 0 | 0 | 0 | 0 | 0 | 0 | 0 | 0 | 0 | 0 | 0 | 2 | 0 | 0 | 0 | 0 | 0 |
| 1031<br>00 | [V]Personal history of malignant neoplasm of eye             | 0 | 0 | 0 | 0 | 0 | 0 | 0 | 0 | 0 | 0 | 0 | 0 | 2 | 0 | 0 | 0 | 0 | 0 |
| 1031<br>78 | [M]Basal cell carcinoma, infiltrative                        | 0 | 0 | 0 | 0 | 0 | 0 | 0 | 0 | 0 | 0 | 0 | 0 | 2 | 0 | 0 | 0 | 0 | 0 |
| 1033<br>54 | MALIGNANT NEOPLASM OF SHORT BONES OF LEG NOS                 | 0 | 0 | 0 | 0 | 0 | 0 | 0 | 0 | 0 | 0 | 0 | 0 | 2 | 0 | 0 | 0 | 0 | 0 |

|            |                                                              |   |   |   |   |   |   |   |   |   |   |   |   |   |   |   |   |   |   |   |
|------------|--------------------------------------------------------------|---|---|---|---|---|---|---|---|---|---|---|---|---|---|---|---|---|---|---|
| 1034<br>40 | [M]Basal cell carcinoma, micronodular                        | 0 | 0 | 0 | 0 | 0 | 0 | 0 | 0 | 0 | 0 | 0 | 0 | 0 | 2 | 0 | 0 | 0 | 0 | 0 |
| 1037<br>96 | Malignant neoplasm of vestibule of mouth                     | 0 | 0 | 0 | 0 | 0 | 0 | 0 | 0 | 0 | 0 | 0 | 0 | 0 | 2 | 0 | 0 | 0 | 0 | 0 |
| 1038<br>83 | [M]RETINOBLASTOMA, UNDIFFERENTIATED TYPE                     | 0 | 0 | 0 | 0 | 0 | 0 | 0 | 0 | 0 | 0 | 0 | 0 | 0 | 2 | 0 | 0 | 0 | 0 | 0 |
| 1039<br>46 | MALIGNANT NEOPLASM OF MUCOSA OF TRACHEA                      | 0 | 0 | 0 | 0 | 0 | 0 | 0 | 0 | 0 | 0 | 0 | 0 | 0 | 2 | 0 | 0 | 0 | 0 | 0 |
| 1039<br>95 | Malignant neoplasm of aortic body or paraganglia NOS         | 0 | 0 | 0 | 0 | 0 | 0 | 0 | 0 | 0 | 0 | 0 | 0 | 0 | 2 | 0 | 0 | 0 | 0 | 0 |
| 1040<br>25 | MALIGNANT NEOPLASM OF SKIN OF HEEL                           | 0 | 0 | 0 | 0 | 0 | 0 | 0 | 0 | 0 | 0 | 0 | 0 | 0 | 2 | 0 | 0 | 0 | 0 | 0 |
| 1041<br>28 | Kaposi's sarcoma of soft tissue                              | 0 | 0 | 0 | 0 | 0 | 0 | 0 | 0 | 0 | 0 | 0 | 0 | 0 | 2 | 0 | 0 | 0 | 0 | 0 |
| 1041<br>39 | Malig neoplasm of connective and soft tissues of thor spine  | 0 | 0 | 0 | 0 | 0 | 0 | 0 | 0 | 0 | 0 | 0 | 0 | 0 | 2 | 0 | 0 | 0 | 0 | 0 |
| 1043<br>24 | MALIGNANT TUMOUR OF UNKNOWN ORIGIN                           | 0 | 0 | 0 | 0 | 0 | 0 | 0 | 0 | 0 | 0 | 0 | 0 | 0 | 2 | 0 | 0 | 0 | 0 | 0 |
| 1046<br>09 | CLARK MELANOMA LEVEL 2                                       | 0 | 0 | 0 | 0 | 0 | 0 | 0 | 0 | 0 | 0 | 0 | 0 | 0 | 2 | 0 | 0 | 0 | 0 | 0 |
| 1046<br>84 | MULTIPLE SELF-HEALING EPITHELIOMA OF FERGUSON-SMITH          | 0 | 0 | 0 | 0 | 0 | 0 | 0 | 0 | 0 | 0 | 0 | 0 | 0 | 2 | 0 | 0 | 0 | 0 | 0 |
| 1047<br>20 | [M]SARCOMATOID MESOTHELIOMA                                  | 0 | 0 | 0 | 0 | 0 | 0 | 0 | 0 | 0 | 0 | 0 | 0 | 0 | 2 | 0 | 0 | 0 | 0 | 0 |
| 1050<br>72 | [X]MAL NEOPLASM/OVERLAP LES/PERIPH NERV+AUTONOMIC NERV SYSTM | 0 | 0 | 0 | 0 | 0 | 0 | 0 | 0 | 0 | 0 | 0 | 0 | 0 | 2 | 0 | 0 | 0 | 0 | 0 |
| 1050<br>83 | Histiocytic sarcoma                                          | 0 | 0 | 0 | 0 | 0 | 0 | 0 | 0 | 0 | 0 | 0 | 0 | 0 | 2 | 0 | 0 | 0 | 0 | 0 |
| 1051<br>66 | [M]Glomoid sarcoma                                           | 0 | 0 | 0 | 0 | 0 | 0 | 0 | 0 | 0 | 0 | 0 | 0 | 0 | 2 | 0 | 0 | 0 | 0 | 0 |
| 1052<br>75 | [M]Periosteal osteogenic sarcoma                             | 0 | 0 | 0 | 0 | 0 | 0 | 0 | 0 | 0 | 0 | 0 | 0 | 0 | 2 | 0 | 0 | 0 | 0 | 0 |
| 1053<br>88 | LOCAL RECURRENCE OF MALIGNANT TUMOUR OF URINARY BLADDER      | 0 | 0 | 0 | 0 | 0 | 0 | 0 | 0 | 0 | 0 | 0 | 0 | 0 | 2 | 0 | 0 | 0 | 0 | 0 |
| 1054<br>75 | MALIGNANT NEOPLASM OF SHORT BONES OF LEG                     | 0 | 0 | 0 | 0 | 0 | 0 | 0 | 0 | 0 | 0 | 0 | 0 | 0 | 2 | 0 | 0 | 0 | 0 | 0 |
| 1054<br>88 | LOCAL RECURRENCE OF MALIGNANT TUMOUR OF BREAST               | 0 | 0 | 0 | 0 | 0 | 0 | 0 | 0 | 0 | 0 | 0 | 0 | 0 | 2 | 0 | 0 | 0 | 0 | 0 |
| 1056<br>13 | MALIGNANT NEOPLASM OF SPHINCTER OF ODDI                      | 0 | 0 | 0 | 0 | 0 | 0 | 0 | 0 | 0 | 0 | 0 | 0 | 0 | 2 | 0 | 0 | 0 | 0 | 0 |
| 1057<br>97 | MALIGNANT NEOPLASM OF ACROMION                               | 0 | 0 | 0 | 0 | 0 | 0 | 0 | 0 | 0 | 0 | 0 | 0 | 0 | 2 | 0 | 0 | 0 | 0 | 0 |
| 1059<br>44 | [M]MIXED CELL RHABDOMYOSARCOMA                               | 0 | 0 | 0 | 0 | 0 | 0 | 0 | 0 | 0 | 0 | 0 | 0 | 0 | 2 | 0 | 0 | 0 | 0 | 0 |
| 1060<br>69 | MALIGNANT NEOPLASM OF CARPAL BONES                           | 0 | 0 | 0 | 0 | 0 | 0 | 0 | 0 | 0 | 0 | 0 | 0 | 0 | 2 | 0 | 0 | 0 | 0 | 0 |
| 1061<br>31 | [M]OLFACTORY NEUROEPITHELIOMA                                | 0 | 0 | 0 | 0 | 0 | 0 | 0 | 0 | 0 | 0 | 0 | 0 | 0 | 2 | 0 | 0 | 0 | 0 | 0 |

|            |                                                             |   |   |   |   |   |   |   |   |   |   |   |   |   |   |   |   |   |   |   |
|------------|-------------------------------------------------------------|---|---|---|---|---|---|---|---|---|---|---|---|---|---|---|---|---|---|---|
| 1061<br>94 | MALIGNANT NEOPLASM OF VISCERAL PLEURA                       | 0 | 0 | 0 | 0 | 0 | 0 | 0 | 0 | 0 | 0 | 0 | 0 | 0 | 2 | 0 | 0 | 0 | 0 | 0 |
| 1066<br>54 | Mal neoplasm/periph nerves+autonomic nervous system,unspc   | 0 | 0 | 0 | 0 | 0 | 0 | 0 | 0 | 0 | 0 | 0 | 0 | 0 | 2 | 0 | 0 | 0 | 0 | 0 |
| 1068<br>89 | [M]EMBRYONAL HEPATOMA                                       | 0 | 0 | 0 | 0 | 0 | 0 | 0 | 0 | 0 | 0 | 0 | 0 | 0 | 2 | 0 | 0 | 0 | 0 | 0 |
| 1069<br>15 | MALIGNANT NEOPLASM OF NASOPHARYNGEAL SOFT PALATE SURFACE    | 0 | 0 | 0 | 0 | 0 | 0 | 0 | 0 | 0 | 0 | 0 | 0 | 0 | 2 | 0 | 0 | 0 | 0 | 0 |
| 1071<br>26 | MALIGNANT NEOPLASM OF SACROCOCCYGEAL REGION                 | 0 | 0 | 0 | 0 | 0 | 0 | 0 | 0 | 0 | 0 | 0 | 0 | 0 | 2 | 0 | 0 | 0 | 0 | 0 |
| 1072<br>58 | Malignant neoplasm of midline of tongue                     | 0 | 0 | 0 | 0 | 0 | 0 | 0 | 0 | 0 | 0 | 0 | 0 | 0 | 2 | 0 | 0 | 0 | 0 | 0 |
| 1072<br>99 | [M]Combined hepatocellular carcinoma and cholangiocarcinoma | 0 | 0 | 0 | 0 | 0 | 0 | 0 | 0 | 0 | 0 | 0 | 0 | 0 | 2 | 0 | 0 | 0 | 0 | 0 |
| 1083<br>89 | Malignant neoplasm soft tissues of cervical spine           | 0 | 0 | 0 | 0 | 0 | 0 | 0 | 0 | 0 | 0 | 0 | 0 | 0 | 2 | 0 | 0 | 0 | 0 | 0 |
| 1086<br>38 | Malignant neoplasm of third metacarpal bone                 | 0 | 0 | 0 | 0 | 0 | 0 | 0 | 0 | 0 | 0 | 0 | 0 | 0 | 2 | 0 | 0 | 0 | 0 | 0 |
| 1086<br>67 | Angiosarcoma of spleen                                      | 0 | 0 | 0 | 0 | 0 | 0 | 0 | 0 | 0 | 0 | 0 | 0 | 0 | 2 | 0 | 0 | 0 | 0 | 0 |
| 1086<br>82 | [M]Germinoblastic sarcoma NOS                               | 0 | 0 | 0 | 0 | 0 | 0 | 0 | 0 | 0 | 0 | 0 | 0 | 0 | 2 | 0 | 0 | 0 | 0 | 0 |
| 1088<br>66 | Clark melanoma level 5                                      | 0 | 0 | 0 | 0 | 0 | 0 | 0 | 0 | 0 | 0 | 0 | 0 | 0 | 2 | 0 | 0 | 0 | 0 | 0 |
| 1089<br>22 | Wilms' tumour + nephrotic syndrome + pseudohermaphroditism  | 0 | 0 | 0 | 0 | 0 | 0 | 0 | 0 | 0 | 0 | 0 | 0 | 0 | 2 | 0 | 0 | 0 | 0 | 0 |
| 1090<br>02 | Malignant melanoma of perianal skin                         | 0 | 0 | 0 | 0 | 0 | 0 | 0 | 0 | 0 | 0 | 0 | 0 | 0 | 2 | 0 | 0 | 0 | 0 | 0 |
| 1094<br>29 | [V]Personal history of malignant neoplasm of genital organ  | 0 | 0 | 0 | 0 | 0 | 0 | 0 | 0 | 0 | 0 | 0 | 0 | 0 | 2 | 0 | 0 | 0 | 0 | 0 |
| 1094<br>73 | Malignant neoplasm of cerebral pia mater                    | 0 | 0 | 0 | 0 | 0 | 0 | 0 | 0 | 0 | 0 | 0 | 0 | 0 | 2 | 0 | 0 | 0 | 0 | 0 |
| 4072       | Acute leukaemia NOS                                         | 0 | 0 | 0 | 0 | 0 | 0 | 0 | 0 | 0 | 0 | 0 | 0 | 0 | 0 | 2 | 0 | 0 | 0 | 0 |
| 4222       | Lymphatic leukaemia                                         | 0 | 0 | 0 | 0 | 0 | 0 | 0 | 0 | 0 | 0 | 0 | 0 | 0 | 0 | 2 | 0 | 0 | 0 | 0 |
| 4250       | Leukaemia NOS                                               | 0 | 0 | 0 | 0 | 0 | 0 | 0 | 0 | 0 | 0 | 0 | 0 | 0 | 0 | 2 | 0 | 0 | 0 | 0 |
| 4251       | Acute lymphoid leukaemia                                    | 0 | 0 | 0 | 0 | 0 | 0 | 0 | 0 | 0 | 0 | 0 | 0 | 0 | 0 | 2 | 0 | 0 | 0 | 0 |
| 4413       | Acute myeloid leukaemia                                     | 0 | 0 | 0 | 0 | 0 | 0 | 0 | 0 | 0 | 0 | 0 | 0 | 0 | 0 | 2 | 0 | 0 | 0 | 0 |
| 4637       | [M]Leukaemias                                               | 0 | 0 | 0 | 0 | 0 | 0 | 0 | 0 | 0 | 0 | 0 | 0 | 0 | 0 | 2 | 0 | 0 | 0 | 0 |
| 5137       | Leukaemic reticuloendotheliosis                             | 0 | 0 | 0 | 0 | 0 | 0 | 0 | 0 | 0 | 0 | 0 | 0 | 0 | 0 | 2 | 0 | 0 | 0 | 0 |
| 5915       | [M]Hairy cell leukaemia                                     | 0 | 0 | 0 | 0 | 0 | 0 | 0 | 0 | 0 | 0 | 0 | 0 | 0 | 0 | 2 | 0 | 0 | 0 | 0 |
| 6316       | [M]Acute leukaemia NOS                                      | 0 | 0 | 0 | 0 | 0 | 0 | 0 | 0 | 0 | 0 | 0 | 0 | 0 | 0 | 2 | 0 | 0 | 0 | 0 |
| 7176       | Myeloid leukaemia                                           | 0 | 0 | 0 | 0 | 0 | 0 | 0 | 0 | 0 | 0 | 0 | 0 | 0 | 0 | 2 | 0 | 0 | 0 | 0 |

|      |                                    |   |   |   |   |   |   |   |   |   |   |   |   |   |   |   |   |   |   |
|------|------------------------------------|---|---|---|---|---|---|---|---|---|---|---|---|---|---|---|---|---|---|
| 8625 | Chronic lymphoid leukaemia         | 0 | 0 | 0 | 0 | 0 | 0 | 0 | 0 | 0 | 0 | 0 | 0 | 0 | 2 | 0 | 0 | 0 | 0 |
| 1072 |                                    | 0 |   |   |   |   |   |   |   |   |   |   |   |   |   |   |   |   |   |
| 6    | Chronic myeloid leukaemia          |   | 0 | 0 | 0 | 0 | 0 | 0 | 0 | 0 | 0 | 0 | 0 | 0 | 2 | 0 | 0 | 0 | 0 |
| 1214 |                                    | 0 |   |   |   |   |   |   |   |   |   |   |   |   |   |   |   |   |   |
| 6    | [M]Lymphoid leukaemia NOS          |   | 0 | 0 | 0 | 0 | 0 | 0 | 0 | 0 | 0 | 0 | 0 | 0 | 2 | 0 | 0 | 0 | 0 |
| 1641 |                                    | 0 |   |   |   |   |   |   |   |   |   |   |   |   |   |   |   |   |   |
| 6    | Chronic leukaemia NOS              |   | 0 | 0 | 0 | 0 | 0 | 0 | 0 | 0 | 0 | 0 | 0 | 0 | 2 | 0 | 0 | 0 | 0 |
| 1937 |                                    | 0 |   |   |   |   |   |   |   |   |   |   |   |   |   |   |   |   |   |
| 2    | Lymphoid leukaemia                 |   | 0 | 0 | 0 | 0 | 0 | 0 | 0 | 0 | 0 | 0 | 0 | 0 | 2 | 0 | 0 | 0 | 0 |
| 1997 |                                    | 0 |   |   |   |   |   |   |   |   |   |   |   |   |   |   |   |   |   |
| 4    | Acute monocytic leukaemia          |   | 0 | 0 | 0 | 0 | 0 | 0 | 0 | 0 | 0 | 0 | 0 | 0 | 2 | 0 | 0 | 0 | 0 |
| 2044 |                                    | 0 |   |   |   |   |   |   |   |   |   |   |   |   |   |   |   |   |   |
| 0    | Myelomonocytic leukaemia           |   | 0 | 0 | 0 | 0 | 0 | 0 | 0 | 0 | 0 | 0 | 0 | 0 | 2 | 0 | 0 | 0 | 0 |
| 2063 |                                    | 0 |   |   |   |   |   |   |   |   |   |   |   |   |   |   |   |   |   |
| 5    | [M]Lymphatic leukaemia             |   | 0 | 0 | 0 | 0 | 0 | 0 | 0 | 0 | 0 | 0 | 0 | 0 | 2 | 0 | 0 | 0 | 0 |
| 2205 |                                    | 0 |   |   |   |   |   |   |   |   |   |   |   |   |   |   |   |   |   |
| 0    | Chronic myelomonocytic leukaemia   |   | 0 | 0 | 0 | 0 | 0 | 0 | 0 | 0 | 0 | 0 | 0 | 0 | 2 | 0 | 0 | 0 | 0 |
| 2207 |                                    | 0 |   |   |   |   |   |   |   |   |   |   |   |   |   |   |   |   |   |
| 1    | [M]Blast cell leukaemia            |   | 0 | 0 | 0 | 0 | 0 | 0 | 0 | 0 | 0 | 0 | 0 | 0 | 2 | 0 | 0 | 0 | 0 |
| 2519 |                                    | 0 |   |   |   |   |   |   |   |   |   |   |   |   |   |   |   |   |   |
| 1    | Leukaemia of unspecified cell type |   | 0 | 0 | 0 | 0 | 0 | 0 | 0 | 0 | 0 | 0 | 0 | 0 | 2 | 0 | 0 | 0 | 0 |
| 2733 |                                    | 0 |   |   |   |   |   |   |   |   |   |   |   |   |   |   |   |   |   |
| 0    | Leukaemic reticuloendotheliosis    |   | 0 | 0 | 0 | 0 | 0 | 0 | 0 | 0 | 0 | 0 | 0 | 0 | 2 | 0 | 0 | 0 | 0 |
| 2734 |                                    | 0 |   |   |   |   |   |   |   |   |   |   |   |   |   |   |   |   |   |
| 0    | Di Guglielmo's disease             |   | 0 | 0 | 0 | 0 | 0 | 0 | 0 | 0 | 0 | 0 | 0 | 0 | 2 | 0 | 0 | 0 | 0 |
| 2745 |                                    | 0 |   |   |   |   |   |   |   |   |   |   |   |   |   |   |   |   |   |
| 8    | Chronic monocytic leukaemia        |   | 0 | 0 | 0 | 0 | 0 | 0 | 0 | 0 | 0 | 0 | 0 | 0 | 2 | 0 | 0 | 0 | 0 |
| 2752 |                                    | 0 |   |   |   |   |   |   |   |   |   |   |   |   |   |   |   |   |   |
| 0    | Chronic myeloid leukaemia NOS      |   | 0 | 0 | 0 | 0 | 0 | 0 | 0 | 0 | 0 | 0 | 0 | 0 | 2 | 0 | 0 | 0 | 0 |
| 2766 |                                    | 0 |   |   |   |   |   |   |   |   |   |   |   |   |   |   |   |   |   |
| 4    | Acute promyelocytic leukaemia      |   | 0 | 0 | 0 | 0 | 0 | 0 | 0 | 0 | 0 | 0 | 0 | 0 | 2 | 0 | 0 | 0 | 0 |
| 2779 |                                    | 0 |   |   |   |   |   |   |   |   |   |   |   |   |   |   |   |   |   |
| 0    | Chronic lymphatic leukaemia        |   | 0 | 0 | 0 | 0 | 0 | 0 | 0 | 0 | 0 | 0 | 0 | 0 | 2 | 0 | 0 | 0 | 0 |
| 2827 |                                    | 0 |   |   |   |   |   |   |   |   |   |   |   |   |   |   |   |   |   |
| 6    | Acute myelofibrosis                |   | 0 | 0 | 0 | 0 | 0 | 0 | 0 | 0 | 0 | 0 | 0 | 0 | 2 | 0 | 0 | 0 | 0 |
| 2933 |                                    | 0 |   |   |   |   |   |   |   |   |   |   |   |   |   |   |   |   |   |
| 5    | [M]Adult T-cell leukaemia/lymphoma |   | 0 | 0 | 0 | 0 | 0 | 0 | 0 | 0 | 0 | 0 | 0 | 0 | 2 | 0 | 0 | 0 | 0 |
| 3063 |                                    | 0 |   |   |   |   |   |   |   |   |   |   |   |   |   |   |   |   |   |
| 2    | Other specified leukaemia NOS      |   | 0 | 0 | 0 | 0 | 0 | 0 | 0 | 0 | 0 | 0 | 0 | 0 | 2 | 0 | 0 | 0 | 0 |
| 3158 |                                    | 0 |   |   |   |   |   |   |   |   |   |   |   |   |   |   |   |   |   |
| 6    | Prolymphocytic leukaemia           |   | 0 | 0 | 0 | 0 | 0 | 0 | 0 | 0 | 0 | 0 | 0 | 0 | 2 | 0 | 0 | 0 | 0 |
| 3170 |                                    | 0 |   |   |   |   |   |   |   |   |   |   |   |   |   |   |   |   |   |
| 1    | Chronic granulocytic leukaemia     |   | 0 | 0 | 0 | 0 | 0 | 0 | 0 | 0 | 0 | 0 | 0 | 0 | 2 | 0 | 0 | 0 | 0 |
| 3175 |                                    | 0 |   |   |   |   |   |   |   |   |   |   |   |   |   |   |   |   |   |
| 0    | [M]Chronic leukaemia NOS           |   | 0 | 0 | 0 | 0 | 0 | 0 | 0 | 0 | 0 | 0 | 0 | 0 | 2 | 0 | 0 | 0 | 0 |
| 3334 |                                    | 0 |   |   |   |   |   |   |   |   |   |   |   |   |   |   |   |   |   |
| 4    | Myeloid leukaemia NOS              |   | 0 | 0 | 0 | 0 | 0 | 0 | 0 | 0 | 0 | 0 | 0 | 0 | 2 | 0 | 0 | 0 | 0 |

|      |                                                              |   |   |   |   |   |   |   |   |   |   |   |   |   |   |   |   |   |   |
|------|--------------------------------------------------------------|---|---|---|---|---|---|---|---|---|---|---|---|---|---|---|---|---|---|
| 3469 |                                                              | 0 |   |   |   |   |   |   |   |   |   |   |   |   |   |   |   |   |   |
| 2    | Other leukaemia of unspecified cell type                     |   | 0 | 0 | 0 | 0 | 0 | 0 | 0 | 0 | 0 | 0 | 0 | 0 | 2 | 0 | 0 | 0 | 0 |
| 3569 |                                                              | 0 |   |   |   |   |   |   |   |   |   |   |   |   |   |   |   |   |   |
| 7    | [M]Myeloid leukaemias                                        |   | 0 | 0 | 0 | 0 | 0 | 0 | 0 | 0 | 0 | 0 | 0 | 0 | 2 | 0 | 0 | 0 | 0 |
| 3587 |                                                              | 0 |   |   |   |   |   |   |   |   |   |   |   |   |   |   |   |   |   |
| 5    | Monocytic leukaemia                                          |   | 0 | 0 | 0 | 0 | 0 | 0 | 0 | 0 | 0 | 0 | 0 | 0 | 2 | 0 | 0 | 0 | 0 |
| 3727 |                                                              | 0 |   |   |   |   |   |   |   |   |   |   |   |   |   |   |   |   |   |
| 2    | Other specified leukaemia                                    |   | 0 | 0 | 0 | 0 | 0 | 0 | 0 | 0 | 0 | 0 | 0 | 0 | 2 | 0 | 0 | 0 | 0 |
| 3741 |                                                              | 0 |   |   |   |   |   |   |   |   |   |   |   |   |   |   |   |   |   |
| 0    | [M]Acute lymphoid leukaemia                                  |   | 0 | 0 | 0 | 0 | 0 | 0 | 0 | 0 | 0 | 0 | 0 | 0 | 2 | 0 | 0 | 0 | 0 |
| 3746 |                                                              | 0 |   |   |   |   |   |   |   |   |   |   |   |   |   |   |   |   |   |
| 1    | Adult T-cell leukaemia                                       |   | 0 | 0 | 0 | 0 | 0 | 0 | 0 | 0 | 0 | 0 | 0 | 0 | 2 | 0 | 0 | 0 | 0 |
| 3748 |                                                              | 0 |   |   |   |   |   |   |   |   |   |   |   |   |   |   |   |   |   |
| 7    | [M]Acute myelofibrosis                                       |   | 0 | 0 | 0 | 0 | 0 | 0 | 0 | 0 | 0 | 0 | 0 | 0 | 2 | 0 | 0 | 0 | 0 |
| 3772 |                                                              | 0 |   |   |   |   |   |   |   |   |   |   |   |   |   |   |   |   |   |
| 3    | [M]Granulocytic leukaemia NOS                                |   | 0 | 0 | 0 | 0 | 0 | 0 | 0 | 0 | 0 | 0 | 0 | 0 | 2 | 0 | 0 | 0 | 0 |
| 3833 |                                                              | 0 |   |   |   |   |   |   |   |   |   |   |   |   |   |   |   |   |   |
| 1    | Other lymphoid leukaemia NOS                                 |   | 0 | 0 | 0 | 0 | 0 | 0 | 0 | 0 | 0 | 0 | 0 | 0 | 2 | 0 | 0 | 0 | 0 |
| 3891 |                                                              | 0 |   |   |   |   |   |   |   |   |   |   |   |   |   |   |   |   |   |
| 4    | Lymphoid leukaemia NOS                                       |   | 0 | 0 | 0 | 0 | 0 | 0 | 0 | 0 | 0 | 0 | 0 | 0 | 2 | 0 | 0 | 0 | 0 |
| 3962 |                                                              | 0 |   |   |   |   |   |   |   |   |   |   |   |   |   |   |   |   |   |
| 9    | Granulocytic sarcoma                                         |   | 0 | 0 | 0 | 0 | 0 | 0 | 0 | 0 | 0 | 0 | 0 | 0 | 2 | 0 | 0 | 0 | 0 |
| 4042 |                                                              | 0 |   |   |   |   |   |   |   |   |   |   |   |   |   |   |   |   |   |
| 0    | [M]Leukaemias unspecified                                    |   | 0 | 0 | 0 | 0 | 0 | 0 | 0 | 0 | 0 | 0 | 0 | 0 | 2 | 0 | 0 | 0 | 0 |
| 4150 |                                                              | 0 |   |   |   |   |   |   |   |   |   |   |   |   |   |   |   |   |   |
| 0    | [M]Chronic lymphoid leukaemia                                |   | 0 | 0 | 0 | 0 | 0 | 0 | 0 | 0 | 0 | 0 | 0 | 0 | 2 | 0 | 0 | 0 | 0 |
| 4173 |                                                              | 0 |   |   |   |   |   |   |   |   |   |   |   |   |   |   |   |   |   |
| 4    | [M]Leukaemia NOS                                             |   | 0 | 0 | 0 | 0 | 0 | 0 | 0 | 0 | 0 | 0 | 0 | 0 | 2 | 0 | 0 | 0 | 0 |
| 4229 |                                                              | 0 |   |   |   |   |   |   |   |   |   |   |   |   |   |   |   |   |   |
| 7    | [M]Leukaemia NOS                                             |   | 0 | 0 | 0 | 0 | 0 | 0 | 0 | 0 | 0 | 0 | 0 | 0 | 2 | 0 | 0 | 0 | 0 |
| 4253 |                                                              | 0 |   |   |   |   |   |   |   |   |   |   |   |   |   |   |   |   |   |
| 9    | Acute erythraemia and erythroleukaemia                       |   | 0 | 0 | 0 | 0 | 0 | 0 | 0 | 0 | 0 | 0 | 0 | 0 | 2 | 0 | 0 | 0 | 0 |
| 4442 |                                                              | 0 |   |   |   |   |   |   |   |   |   |   |   |   |   |   |   |   |   |
| 0    | Refractory anaemia with excess of blasts with transformation |   | 0 | 0 | 0 | 0 | 0 | 0 | 0 | 0 | 0 | 0 | 0 | 0 | 2 | 0 | 0 | 0 | 0 |
| 4604 |                                                              | 0 |   |   |   |   |   |   |   |   |   |   |   |   |   |   |   |   |   |
| 8    | [M]Prolymphocytic leukaemia                                  |   | 0 | 0 | 0 | 0 | 0 | 0 | 0 | 0 | 0 | 0 | 0 | 0 | 2 | 0 | 0 | 0 | 0 |
| 4626 |                                                              | 0 |   |   |   |   |   |   |   |   |   |   |   |   |   |   |   |   |   |
| 3    | [M]Acute myelomonocytic leukaemia                            |   | 0 | 0 | 0 | 0 | 0 | 0 | 0 | 0 | 0 | 0 | 0 | 0 | 2 | 0 | 0 | 0 | 0 |
| 4644 |                                                              | 0 |   |   |   |   |   |   |   |   |   |   |   |   |   |   |   |   |   |
| 4    | [M]Erythroleukaemias                                         |   | 0 | 0 | 0 | 0 | 0 | 0 | 0 | 0 | 0 | 0 | 0 | 0 | 2 | 0 | 0 | 0 | 0 |
| 4804 |                                                              | 0 |   |   |   |   |   |   |   |   |   |   |   |   |   |   |   |   |   |
| 9    | [M]Chronic myelomonocytic leukaemia                          |   | 0 | 0 | 0 | 0 | 0 | 0 | 0 | 0 | 0 | 0 | 0 | 0 | 2 | 0 | 0 | 0 | 0 |
| 4815 |                                                              | 0 |   |   |   |   |   |   |   |   |   |   |   |   |   |   |   |   |   |
| 5    | [M]Lymphoid leukaemias                                       |   | 0 | 0 | 0 | 0 | 0 | 0 | 0 | 0 | 0 | 0 | 0 | 0 | 2 | 0 | 0 | 0 | 0 |
| 4932 |                                                              | 0 |   |   |   |   |   |   |   |   |   |   |   |   |   |   |   |   |   |
| 7    | [M]Acute megakaryoblastic leukaemia                          |   | 0 | 0 | 0 | 0 | 0 | 0 | 0 | 0 | 0 | 0 | 0 | 0 | 2 | 0 | 0 | 0 | 0 |
| 4972 |                                                              | 0 |   |   |   |   |   |   |   |   |   |   |   |   |   |   |   |   |   |
| 5    | Other lymphoid leukaemia                                     |   | 0 | 0 | 0 | 0 | 0 | 0 | 0 | 0 | 0 | 0 | 0 | 0 | 2 | 0 | 0 | 0 | 0 |

|      |   |                                                      |   |   |   |   |   |   |   |   |   |   |   |   |   |   |   |   |   |   |
|------|---|------------------------------------------------------|---|---|---|---|---|---|---|---|---|---|---|---|---|---|---|---|---|---|
| 5085 | 8 | Acute panmyelosis                                    | 0 | 0 | 0 | 0 | 0 | 0 | 0 | 0 | 0 | 0 | 0 | 0 | 0 | 2 | 0 | 0 | 0 | 0 |
| 5092 | 8 | [M]Burkitt's cell leukaemia                          | 0 | 0 | 0 | 0 | 0 | 0 | 0 | 0 | 0 | 0 | 0 | 0 | 0 | 2 | 0 | 0 | 0 | 0 |
| 5232 | 7 | Chloroma                                             | 0 | 0 | 0 | 0 | 0 | 0 | 0 | 0 | 0 | 0 | 0 | 0 | 0 | 2 | 0 | 0 | 0 | 0 |
| 5294 | 2 | [M]Chronic myeloid leukaemia                         | 0 | 0 | 0 | 0 | 0 | 0 | 0 | 0 | 0 | 0 | 0 | 0 | 0 | 2 | 0 | 0 | 0 | 0 |
| 5458 | 5 | [M]Acute myeloid leukaemia                           | 0 | 0 | 0 | 0 | 0 | 0 | 0 | 0 | 0 | 0 | 0 | 0 | 0 | 2 | 0 | 0 | 0 | 0 |
| 5479 | 3 | Subacute leukaemia NOS                               | 0 | 0 | 0 | 0 | 0 | 0 | 0 | 0 | 0 | 0 | 0 | 0 | 0 | 2 | 0 | 0 | 0 | 0 |
| 5731 | 6 | [M]Acute promyelocytic leukaemia                     | 0 | 0 | 0 | 0 | 0 | 0 | 0 | 0 | 0 | 0 | 0 | 0 | 0 | 2 | 0 | 0 | 0 | 0 |
| 5767 | 1 | Megakaryocytic leukaemia                             | 0 | 0 | 0 | 0 | 0 | 0 | 0 | 0 | 0 | 0 | 0 | 0 | 0 | 2 | 0 | 0 | 0 | 0 |
| 5771 | 3 | [M]Eosinophilic leukaemias                           | 0 | 0 | 0 | 0 | 0 | 0 | 0 | 0 | 0 | 0 | 0 | 0 | 0 | 2 | 0 | 0 | 0 | 0 |
| 5992 | 9 | [M]Leukaemia unspecified, NOS                        | 0 | 0 | 0 | 0 | 0 | 0 | 0 | 0 | 0 | 0 | 0 | 0 | 0 | 2 | 0 | 0 | 0 | 0 |
| 6150 | 0 | Acute myelomonocytic leukaemia                       | 0 | 0 | 0 | 0 | 0 | 0 | 0 | 0 | 0 | 0 | 0 | 0 | 0 | 2 | 0 | 0 | 0 | 0 |
| 6169 | 3 | [X]Other myeloid leukaemia                           | 0 | 0 | 0 | 0 | 0 | 0 | 0 | 0 | 0 | 0 | 0 | 0 | 0 | 2 | 0 | 0 | 0 | 0 |
| 6233 | 0 | [M]Other myeloid leukaemia NOS                       | 0 | 0 | 0 | 0 | 0 | 0 | 0 | 0 | 0 | 0 | 0 | 0 | 0 | 2 | 0 | 0 | 0 | 0 |
| 6347 | 5 | Subacute myeloid leukaemia                           | 0 | 0 | 0 | 0 | 0 | 0 | 0 | 0 | 0 | 0 | 0 | 0 | 0 | 2 | 0 | 0 | 0 | 0 |
| 6357 | 0 | [M]Stem cell leukaemia                               | 0 | 0 | 0 | 0 | 0 | 0 | 0 | 0 | 0 | 0 | 0 | 0 | 0 | 2 | 0 | 0 | 0 | 0 |
| 6496 | 3 | [M]Blastic leukaemia                                 | 0 | 0 | 0 | 0 | 0 | 0 | 0 | 0 | 0 | 0 | 0 | 0 | 0 | 2 | 0 | 0 | 0 | 0 |
| 6512 | 2 | Leukaemic reticuloendotheliosis of unspecified sites | 0 | 0 | 0 | 0 | 0 | 0 | 0 | 0 | 0 | 0 | 0 | 0 | 0 | 2 | 0 | 0 | 0 | 0 |
| 6512 | 3 | Leukaemic reticuloend of intra-abdominal lymph nodes | 0 | 0 | 0 | 0 | 0 | 0 | 0 | 0 | 0 | 0 | 0 | 0 | 0 | 2 | 0 | 0 | 0 | 0 |
| 6516 | 5 | [X]Other leukaemia of unspecified cell type          | 0 | 0 | 0 | 0 | 0 | 0 | 0 | 0 | 0 | 0 | 0 | 0 | 0 | 2 | 0 | 0 | 0 | 0 |
| 6572 | 1 | Mast cell leukaemia                                  | 0 | 0 | 0 | 0 | 0 | 0 | 0 | 0 | 0 | 0 | 0 | 0 | 0 | 2 | 0 | 0 | 0 | 0 |
| 6577 | 7 | Thrombocytic leukaemia                               | 0 | 0 | 0 | 0 | 0 | 0 | 0 | 0 | 0 | 0 | 0 | 0 | 0 | 2 | 0 | 0 | 0 | 0 |
| 6608 | 9 | Other myeloid leukaemia NOS                          | 0 | 0 | 0 | 0 | 0 | 0 | 0 | 0 | 0 | 0 | 0 | 0 | 0 | 2 | 0 | 0 | 0 | 0 |
| 6669 | 4 | [M]Naegeli-type monocytic leukaemia                  | 0 | 0 | 0 | 0 | 0 | 0 | 0 | 0 | 0 | 0 | 0 | 0 | 0 | 2 | 0 | 0 | 0 | 0 |
| 6702 | 9 | [X]Other lymphoid leukaemia                          | 0 | 0 | 0 | 0 | 0 | 0 | 0 | 0 | 0 | 0 | 0 | 0 | 0 | 2 | 0 | 0 | 0 | 0 |





|      |                                                      |   |   |   |   |   |   |   |   |   |   |   |   |   |   |   |   |   |   |
|------|------------------------------------------------------|---|---|---|---|---|---|---|---|---|---|---|---|---|---|---|---|---|---|
| 1007 |                                                      | 0 |   |   |   |   |   |   |   |   |   |   |   |   |   |   |   |   |   |
| 86   | Chronic eosinophilic leukaemia                       |   | 0 | 0 | 0 | 0 | 0 | 0 | 0 | 0 | 0 | 0 | 0 | 0 | 2 | 0 | 0 | 0 | 0 |
| 1009 |                                                      | 0 |   |   |   |   |   |   |   |   |   |   |   |   |   |   |   |   |   |
| 27   | [M]Erythroleukaemia NOS                              |   | 0 | 0 | 0 | 0 | 0 | 0 | 0 | 0 | 0 | 0 | 0 | 0 | 2 | 0 | 0 | 0 | 0 |
| 1012 |                                                      | 0 |   |   |   |   |   |   |   |   |   |   |   |   |   |   |   |   |   |
| 71   | [M]Acute panmyelosis                                 |   | 0 | 0 | 0 | 0 | 0 | 0 | 0 | 0 | 0 | 0 | 0 | 0 | 2 | 0 | 0 | 0 | 0 |
| 1016 |                                                      | 0 |   |   |   |   |   |   |   |   |   |   |   |   |   |   |   |   |   |
| 06   | Subacute monocytic leukaemia                         |   | 0 | 0 | 0 | 0 | 0 | 0 | 0 | 0 | 0 | 0 | 0 | 0 | 2 | 0 | 0 | 0 | 0 |
| 1027 |                                                      | 0 |   |   |   |   |   |   |   |   |   |   |   |   |   |   |   |   |   |
| 64   | [M]Acute panmyelosis                                 |   | 0 | 0 | 0 | 0 | 0 | 0 | 0 | 0 | 0 | 0 | 0 | 0 | 2 | 0 | 0 | 0 | 0 |
| 1027 |                                                      | 0 |   |   |   |   |   |   |   |   |   |   |   |   |   |   |   |   |   |
| 83   | Chronic neutrophilic leukaemia                       |   | 0 | 0 | 0 | 0 | 0 | 0 | 0 | 0 | 0 | 0 | 0 | 0 | 2 | 0 | 0 | 0 | 0 |
| 1043 |                                                      | 0 |   |   |   |   |   |   |   |   |   |   |   |   |   |   |   |   |   |
| 25   | B-cell acute lymphoblastic leukaemia                 |   | 0 | 0 | 0 | 0 | 0 | 0 | 0 | 0 | 0 | 0 | 0 | 0 | 2 | 0 | 0 | 0 | 0 |
| 1043 |                                                      | 0 |   |   |   |   |   |   |   |   |   |   |   |   |   |   |   |   |   |
| 28   | B-cell chronic lymphocytic leukaemia                 |   | 0 | 0 | 0 | 0 | 0 | 0 | 0 | 0 | 0 | 0 | 0 | 0 | 2 | 0 | 0 | 0 | 0 |
| 1044 |                                                      | 0 |   |   |   |   |   |   |   |   |   |   |   |   |   |   |   |   |   |
| 75   | Subacute myelomonocytic leukaemia                    |   | 0 | 0 | 0 | 0 | 0 | 0 | 0 | 0 | 0 | 0 | 0 | 0 | 2 | 0 | 0 | 0 | 0 |
| 1047 |                                                      | 0 |   |   |   |   |   |   |   |   |   |   |   |   |   |   |   |   |   |
| 88   | Acute myeloblastic leukaemia                         |   | 0 | 0 | 0 | 0 | 0 | 0 | 0 | 0 | 0 | 0 | 0 | 0 | 2 | 0 | 0 | 0 | 0 |
| 1049 |                                                      | 0 |   |   |   |   |   |   |   |   |   |   |   |   |   |   |   |   |   |
| 39   | Adult T-cell lymphoma/leukaemia (HTLV-1-associated)  |   | 0 | 0 | 0 | 0 | 0 | 0 | 0 | 0 | 0 | 0 | 0 | 0 | 2 | 0 | 0 | 0 | 0 |
| 1050 |                                                      | 0 |   |   |   |   |   |   |   |   |   |   |   |   |   |   |   |   |   |
| 69   | Juvenile myelomonocytic leukaemia                    |   | 0 | 0 | 0 | 0 | 0 | 0 | 0 | 0 | 0 | 0 | 0 | 0 | 2 | 0 | 0 | 0 | 0 |
| 1059 |                                                      | 0 |   |   |   |   |   |   |   |   |   |   |   |   |   |   |   |   |   |
| 57   | Chronic myeloid leukaemia, BCR/ABL positive          |   | 0 | 0 | 0 | 0 | 0 | 0 | 0 | 0 | 0 | 0 | 0 | 0 | 2 | 0 | 0 | 0 | 0 |
| 1061 |                                                      | 0 |   |   |   |   |   |   |   |   |   |   |   |   |   |   |   |   |   |
| 97   | [M]Basophilic leukaemia                              |   | 0 | 0 | 0 | 0 | 0 | 0 | 0 | 0 | 0 | 0 | 0 | 0 | 2 | 0 | 0 | 0 | 0 |
| 1064 |                                                      | 0 |   |   |   |   |   |   |   |   |   |   |   |   |   |   |   |   |   |
| 83   | [M]Subacute myeloid leukaemia                        |   | 0 | 0 | 0 | 0 | 0 | 0 | 0 | 0 | 0 | 0 | 0 | 0 | 2 | 0 | 0 | 0 | 0 |
| 1069 |                                                      | 0 |   |   |   |   |   |   |   |   |   |   |   |   |   |   |   |   |   |
| 24   | Clinical stage B chronic lymphocytic leukaemia       |   | 0 | 0 | 0 | 0 | 0 | 0 | 0 | 0 | 0 | 0 | 0 | 0 | 2 | 0 | 0 | 0 | 0 |
| 1070 |                                                      | 0 |   |   |   |   |   |   |   |   |   |   |   |   |   |   |   |   |   |
| 17   | Chronic lymphocytic leukaemia of B-cell type         |   | 0 | 0 | 0 | 0 | 0 | 0 | 0 | 0 | 0 | 0 | 0 | 0 | 2 | 0 | 0 | 0 | 0 |
| 1070 |                                                      | 0 |   |   |   |   |   |   |   |   |   |   |   |   |   |   |   |   |   |
| 52   | Clinical stage A chronic lymphocytic leukaemia       |   | 0 | 0 | 0 | 0 | 0 | 0 | 0 | 0 | 0 | 0 | 0 | 0 | 2 | 0 | 0 | 0 | 0 |
| 1071 |                                                      | 0 |   |   |   |   |   |   |   |   |   |   |   |   |   |   |   |   |   |
| 63   | Clinical stage C chronic lymphocytic leukaemia       |   | 0 | 0 | 0 | 0 | 0 | 0 | 0 | 0 | 0 | 0 | 0 | 0 | 2 | 0 | 0 | 0 | 0 |
| 1072 |                                                      | 0 |   |   |   |   |   |   |   |   |   |   |   |   |   |   |   |   |   |
| 36   | Atypical chronic myeloid leukaemia, BCR/ABL negative |   | 0 | 0 | 0 | 0 | 0 | 0 | 0 | 0 | 0 | 0 | 0 | 0 | 2 | 0 | 0 | 0 | 0 |
| 1076 |                                                      | 0 |   |   |   |   |   |   |   |   |   |   |   |   |   |   |   |   |   |
| 43   | T-cell prolymphocytic leukaemia                      |   | 0 | 0 | 0 | 0 | 0 | 0 | 0 | 0 | 0 | 0 | 0 | 0 | 2 | 0 | 0 | 0 | 0 |
| 1077 |                                                      | 0 |   |   |   |   |   |   |   |   |   |   |   |   |   |   |   |   |   |
| 73   | [M]Eosinophilic leukaemia NOS                        |   | 0 | 0 | 0 | 0 | 0 | 0 | 0 | 0 | 0 | 0 | 0 | 0 | 2 | 0 | 0 | 0 | 0 |
| 1083 |                                                      | 0 |   |   |   |   |   |   |   |   |   |   |   |   |   |   |   |   |   |
| 16   | [M]Miscellaneous leukaemia NOS                       |   | 0 | 0 | 0 | 0 | 0 | 0 | 0 | 0 | 0 | 0 | 0 | 0 | 2 | 0 | 0 | 0 | 0 |
| 1084 |                                                      | 0 |   |   |   |   |   |   |   |   |   |   |   |   |   |   |   |   |   |
| 24   | Acute monoblastic leukaemia                          |   | 0 | 0 | 0 | 0 | 0 | 0 | 0 | 0 | 0 | 0 | 0 | 0 | 2 | 0 | 0 | 0 | 0 |



|      |                                                             |   |   |   |   |   |   |   |   |   |   |   |   |   |   |   |   |   |   |
|------|-------------------------------------------------------------|---|---|---|---|---|---|---|---|---|---|---|---|---|---|---|---|---|---|
| 6043 |                                                             | 0 | 0 | 0 | 0 | 0 | 0 | 0 | 0 | 0 | 0 | 0 | 0 | 0 | 0 | 0 | 0 | 0 | 0 |
| 3    | Osteoporosis in multiple myelomatosis                       |   |   |   |   |   |   |   |   |   |   |   |   |   |   | 2 | 0 | 0 | 0 |
| 6386 |                                                             | 0 | 0 | 0 | 0 | 0 | 0 | 0 | 0 | 0 | 0 | 0 | 0 | 0 | 0 | 0 | 0 | 0 | 0 |
| 4    | [M]Plasmacytoma NOS                                         |   |   |   |   |   |   |   |   |   |   |   |   |   |   | 2 | 0 | 0 | 0 |
| 6461 |                                                             | 0 | 0 | 0 | 0 | 0 | 0 | 0 | 0 | 0 | 0 | 0 | 0 | 0 | 0 | 0 | 0 | 0 | 0 |
| 8    | [M]Plasma cell leukaemias                                   |   |   |   |   |   |   |   |   |   |   |   |   |   |   | 2 | 0 | 0 | 0 |
| 7313 |                                                             | 0 | 0 | 0 | 0 | 0 | 0 | 0 | 0 | 0 | 0 | 0 | 0 | 0 | 0 | 0 | 0 | 0 | 0 |
| 5    | [M]Solitary myeloma                                         |   |   |   |   |   |   |   |   |   |   |   |   |   |   | 2 | 0 | 0 | 0 |
| 9970 |                                                             | 0 | 0 | 0 | 0 | 0 | 0 | 0 | 0 | 0 | 0 | 0 | 0 | 0 | 0 | 0 | 0 | 0 | 0 |
| 2    | [M]Plasma cell tumour, malignant                            |   |   |   |   |   |   |   |   |   |   |   |   |   |   | 2 | 0 | 0 | 0 |
| 1021 |                                                             | 0 | 0 | 0 | 0 | 0 | 0 | 0 | 0 | 0 | 0 | 0 | 0 | 0 | 0 | 0 | 0 | 0 | 0 |
| 64   | [M]Monostotic myeloma                                       |   |   |   |   |   |   |   |   |   |   |   |   |   |   | 2 | 0 | 0 | 0 |
| 1044 |                                                             | 0 | 0 | 0 | 0 | 0 | 0 | 0 | 0 | 0 | 0 | 0 | 0 | 0 | 0 | 0 | 0 | 0 | 0 |
| 18   | Solitary plasmacytoma                                       |   |   |   |   |   |   |   |   |   |   |   |   |   |   | 2 | 0 | 0 | 0 |
| 3832 |                                                             | 0 | 0 | 0 | 0 | 0 | 0 | 0 | 0 | 0 | 0 | 0 | 0 | 0 | 0 | 0 | 0 | 0 | 0 |
| 1    | Plasmacytoma NOS                                            |   |   |   |   |   |   |   |   |   |   |   |   |   |   | 2 | 0 | 0 | 0 |
| 3718 |                                                             | 0 | 0 | 0 | 0 | 0 | 0 | 0 | 0 | 0 | 0 | 0 | 0 | 0 | 0 | 0 | 0 | 0 | 0 |
| 2    | Multiple myeloma and immunoproliferative neoplasms          |   |   |   |   |   |   |   |   |   |   |   |   |   |   | 2 | 0 | 0 | 0 |
| 4345 |                                                             | 0 | 0 | 0 | 0 | 0 | 0 | 0 | 0 | 0 | 0 | 0 | 0 | 0 | 0 | 0 | 0 | 0 | 0 |
| 0    | Immunoproliferative neoplasm or myeloma NOS                 |   |   |   |   |   |   |   |   |   |   |   |   |   |   | 2 | 0 | 0 | 0 |
| 4056 |                                                             | 0 | 0 | 0 | 0 | 0 | 0 | 0 | 0 | 0 | 0 | 0 | 0 | 0 | 0 | 0 | 0 | 0 | 0 |
| 1    | [V]Personal history of Hodgkin's disease                    |   |   |   |   |   |   |   |   |   |   |   |   |   |   | 2 | 0 | 0 | 0 |
| 7220 |                                                             | 0 | 0 | 0 | 0 | 0 | 0 | 0 | 0 | 0 | 0 | 0 | 0 | 0 | 0 | 0 | 0 | 0 | 0 |
| 4    | [V]Personal history other lymphatic/haematopoietic neoplasm |   |   |   |   |   |   |   |   |   |   |   |   |   |   | 2 | 0 | 0 | 0 |
| 5118 |                                                             | 0 | 0 | 0 | 0 | 0 | 0 | 0 | 0 | 0 | 0 | 0 | 0 | 0 | 0 | 0 | 0 | 0 | 0 |
| 2    | H/O: * other lymph/haematopoi.                              |   |   |   |   |   |   |   |   |   |   |   |   |   |   | 2 | 0 | 0 | 0 |
| 1481 |                                                             | 0 | 0 | 0 | 0 | 0 | 0 | 0 | 0 | 0 | 0 | 0 | 0 | 0 | 0 | 0 | 0 | 0 | 0 |
| 1481 | Reticulosarcoma                                             |   |   |   |   |   |   |   |   |   |   |   |   |   |   | 2 | 0 | 0 | 0 |
| 1483 |                                                             | 0 | 0 | 0 | 0 | 0 | 0 | 0 | 0 | 0 | 0 | 0 | 0 | 0 | 0 | 0 | 0 | 0 | 0 |
| 1483 | [M]Lymphoma NOS                                             |   |   |   |   |   |   |   |   |   |   |   |   |   |   | 2 | 0 | 0 | 0 |
| 2462 |                                                             | 0 | 0 | 0 | 0 | 0 | 0 | 0 | 0 | 0 | 0 | 0 | 0 | 0 | 0 | 0 | 0 | 0 | 0 |
| 2462 | Hodgkin's disease                                           |   |   |   |   |   |   |   |   |   |   |   |   |   |   | 2 | 0 | 0 | 0 |
| 3371 |                                                             | 0 | 0 | 0 | 0 | 0 | 0 | 0 | 0 | 0 | 0 | 0 | 0 | 0 | 0 | 0 | 0 | 0 | 0 |
| 3371 | [M]Non Hodgkins lymphoma                                    |   |   |   |   |   |   |   |   |   |   |   |   |   |   | 2 | 0 | 0 | 0 |
| 3604 |                                                             | 0 | 0 | 0 | 0 | 0 | 0 | 0 | 0 | 0 | 0 | 0 | 0 | 0 | 0 | 0 | 0 | 0 | 0 |
| 3604 | Non - Hodgkin's lymphoma                                    |   |   |   |   |   |   |   |   |   |   |   |   |   |   | 2 | 0 | 0 | 0 |
| 3845 |                                                             | 0 | 0 | 0 | 0 | 0 | 0 | 0 | 0 | 0 | 0 | 0 | 0 | 0 | 0 | 0 | 0 | 0 | 0 |
| 3845 | Eosinophilic granuloma                                      |   |   |   |   |   |   |   |   |   |   |   |   |   |   | 2 | 0 | 0 | 0 |
| 4870 |                                                             | 0 | 0 | 0 | 0 | 0 | 0 | 0 | 0 | 0 | 0 | 0 | 0 | 0 | 0 | 0 | 0 | 0 | 0 |
| 4870 | Histiocytosis X (acute, progressive)                        |   |   |   |   |   |   |   |   |   |   |   |   |   |   | 2 | 0 | 0 | 0 |
| 5179 |                                                             | 0 | 0 | 0 | 0 | 0 | 0 | 0 | 0 | 0 | 0 | 0 | 0 | 0 | 0 | 0 | 0 | 0 | 0 |
| 5179 | Nodular lymphoma (Brill - Symmers disease)                  |   |   |   |   |   |   |   |   |   |   |   |   |   |   | 2 | 0 | 0 | 0 |
| 7940 |                                                             | 0 | 0 | 0 | 0 | 0 | 0 | 0 | 0 | 0 | 0 | 0 | 0 | 0 | 0 | 0 | 0 | 0 | 0 |
| 7940 | [X]Non-Hodgkin's lymphoma NOS                               |   |   |   |   |   |   |   |   |   |   |   |   |   |   | 2 | 0 | 0 | 0 |
| 8649 |                                                             | 0 | 0 | 0 | 0 | 0 | 0 | 0 | 0 | 0 | 0 | 0 | 0 | 0 | 0 | 0 | 0 | 0 | 0 |
| 8649 | [X]Non-Hodgkin's lymphoma, unspecified type                 |   |   |   |   |   |   |   |   |   |   |   |   |   |   | 2 | 0 | 0 | 0 |
| 9172 |                                                             | 0 | 0 | 0 | 0 | 0 | 0 | 0 | 0 | 0 | 0 | 0 | 0 | 0 | 0 | 0 | 0 | 0 | 0 |
| 9172 | [M]Waldenstrom's macroglobulinaemia                         |   |   |   |   |   |   |   |   |   |   |   |   |   |   | 2 | 0 | 0 | 0 |
| 1041 |                                                             | 0 | 0 | 0 | 0 | 0 | 0 | 0 | 0 | 0 | 0 | 0 | 0 | 0 | 0 | 0 | 0 | 0 | 0 |
| 1    | Waldenstrom's macroglobulinaemia                            |   |   |   |   |   |   |   |   |   |   |   |   |   |   | 2 | 0 | 0 | 0 |
| 1200 |                                                             | 0 | 0 | 0 | 0 | 0 | 0 | 0 | 0 | 0 | 0 | 0 | 0 | 0 | 0 | 0 | 0 | 0 | 0 |
| 6    | Mycosis fungoides                                           |   |   |   |   |   |   |   |   |   |   |   |   |   |   | 2 | 0 | 0 | 0 |

|           |                                                              |   |   |   |   |   |   |   |   |   |   |   |   |   |   |   |   |   |   |
|-----------|--------------------------------------------------------------|---|---|---|---|---|---|---|---|---|---|---|---|---|---|---|---|---|---|
| 1232<br>3 | Malignant neoplasm of lymphatic and haemopoietic tissue      | 0 | 0 | 0 | 0 | 0 | 0 | 0 | 0 | 0 | 0 | 0 | 0 | 0 | 0 | 2 | 0 | 0 | 0 |
| 1233<br>5 | Malignant lymphoma NOS                                       | 0 | 0 | 0 | 0 | 0 | 0 | 0 | 0 | 0 | 0 | 0 | 0 | 0 | 0 | 2 | 0 | 0 | 0 |
| 1246<br>4 | Peripheral T-cell lymphoma                                   | 0 | 0 | 0 | 0 | 0 | 0 | 0 | 0 | 0 | 0 | 0 | 0 | 0 | 0 | 2 | 0 | 0 | 0 |
| 1502<br>7 | Malignant lymphoma NOS                                       | 0 | 0 | 0 | 0 | 0 | 0 | 0 | 0 | 0 | 0 | 0 | 0 | 0 | 0 | 2 | 0 | 0 | 0 |
| 1503<br>6 | Malignant mast cell tumours                                  | 0 | 0 | 0 | 0 | 0 | 0 | 0 | 0 | 0 | 0 | 0 | 0 | 0 | 0 | 2 | 0 | 0 | 0 |
| 1550<br>4 | Malignant lymphoma NOS of lymph nodes of multiple sites      | 0 | 0 | 0 | 0 | 0 | 0 | 0 | 0 | 0 | 0 | 0 | 0 | 0 | 0 | 2 | 0 | 0 | 0 |
| 1646<br>0 | [M]Malignant lymphoma, non Hodgkin's type                    | 0 | 0 | 0 | 0 | 0 | 0 | 0 | 0 | 0 | 0 | 0 | 0 | 0 | 0 | 2 | 0 | 0 | 0 |
| 1652<br>7 | Macroglobulinaemia                                           | 0 | 0 | 0 | 0 | 0 | 0 | 0 | 0 | 0 | 0 | 0 | 0 | 0 | 0 | 2 | 0 | 0 | 0 |
| 1677<br>4 | [M] Cutaneous lymphoma                                       | 0 | 0 | 0 | 0 | 0 | 0 | 0 | 0 | 0 | 0 | 0 | 0 | 0 | 0 | 2 | 0 | 0 | 0 |
| 1717<br>8 | [M]Lymphomas, NOS or diffuse                                 | 0 | 0 | 0 | 0 | 0 | 0 | 0 | 0 | 0 | 0 | 0 | 0 | 0 | 0 | 2 | 0 | 0 | 0 |
| 1718<br>2 | Follicular lymphoma NOS                                      | 0 | 0 | 0 | 0 | 0 | 0 | 0 | 0 | 0 | 0 | 0 | 0 | 0 | 0 | 2 | 0 | 0 | 0 |
| 1746<br>0 | Diffuse non-Hodgkin's lymphoblastic (diffuse) lymphoma       | 0 | 0 | 0 | 0 | 0 | 0 | 0 | 0 | 0 | 0 | 0 | 0 | 0 | 0 | 2 | 0 | 0 | 0 |
| 1788<br>7 | Malignant lymphoma otherwise specified                       | 0 | 0 | 0 | 0 | 0 | 0 | 0 | 0 | 0 | 0 | 0 | 0 | 0 | 0 | 2 | 0 | 0 | 0 |
| 1838<br>3 | [M] Large cell lymphoma                                      | 0 | 0 | 0 | 0 | 0 | 0 | 0 | 0 | 0 | 0 | 0 | 0 | 0 | 0 | 2 | 0 | 0 | 0 |
| 1914<br>0 | Hodgkin's nodular sclerosis of lymph nodes of multiple sites | 0 | 0 | 0 | 0 | 0 | 0 | 0 | 0 | 0 | 0 | 0 | 0 | 0 | 0 | 2 | 0 | 0 | 0 |
| 2043<br>7 | [M]Lymphomas, nodular or follicular                          | 0 | 0 | 0 | 0 | 0 | 0 | 0 | 0 | 0 | 0 | 0 | 0 | 0 | 0 | 2 | 0 | 0 | 0 |
| 2071<br>0 | [M]Hodgkin's disease                                         | 0 | 0 | 0 | 0 | 0 | 0 | 0 | 0 | 0 | 0 | 0 | 0 | 0 | 0 | 2 | 0 | 0 | 0 |
| 2140<br>2 | Burkitt's lymphoma                                           | 0 | 0 | 0 | 0 | 0 | 0 | 0 | 0 | 0 | 0 | 0 | 0 | 0 | 0 | 2 | 0 | 0 | 0 |
| 2146<br>3 | [M]Lymphocytic lymphoma NOS                                  | 0 | 0 | 0 | 0 | 0 | 0 | 0 | 0 | 0 | 0 | 0 | 0 | 0 | 0 | 2 | 0 | 0 | 0 |
| 2154<br>9 | Follicular non-Hodgkin's lymphoma                            | 0 | 0 | 0 | 0 | 0 | 0 | 0 | 0 | 0 | 0 | 0 | 0 | 0 | 0 | 2 | 0 | 0 | 0 |
| 2371<br>1 | [M]Malignant lymphoma, diffuse NOS                           | 0 | 0 | 0 | 0 | 0 | 0 | 0 | 0 | 0 | 0 | 0 | 0 | 0 | 0 | 2 | 0 | 0 | 0 |
| 2611<br>1 | Lymphomatoid papulosis                                       | 0 | 0 | 0 | 0 | 0 | 0 | 0 | 0 | 0 | 0 | 0 | 0 | 0 | 0 | 2 | 0 | 0 | 0 |
| 2613<br>5 | [M] Alpha heavy chain disease                                | 0 | 0 | 0 | 0 | 0 | 0 | 0 | 0 | 0 | 0 | 0 | 0 | 0 | 0 | 2 | 0 | 0 | 0 |
| 2741<br>6 | Lymphosarcoma                                                | 0 | 0 | 0 | 0 | 0 | 0 | 0 | 0 | 0 | 0 | 0 | 0 | 0 | 0 | 2 | 0 | 0 | 0 |

|      |                                                             |   |   |   |   |   |   |   |   |   |   |   |   |   |   |   |   |   |   |
|------|-------------------------------------------------------------|---|---|---|---|---|---|---|---|---|---|---|---|---|---|---|---|---|---|
| 2756 |                                                             | 0 |   |   |   |   |   |   |   |   |   |   |   |   |   |   |   |   |   |
| 2    | [M]Follicular lymphosarcoma NOS                             | 0 | 0 | 0 | 0 | 0 | 0 | 0 | 0 | 0 | 0 | 0 | 0 | 0 | 0 | 2 | 0 | 0 | 0 |
| 2796 |                                                             | 0 |   |   |   |   |   |   |   |   |   |   |   |   |   |   |   |   |   |
| 5    | [M]AngiocentricT-cell lymphoma                              | 0 | 0 | 0 | 0 | 0 | 0 | 0 | 0 | 0 | 0 | 0 | 0 | 0 | 0 | 2 | 0 | 0 | 0 |
| 2863 |                                                             | 0 |   |   |   |   |   |   |   |   |   |   |   |   |   |   |   |   |   |
| 9    | Follicular non-Hodgkin's small cleaved cell lymphoma        | 0 | 0 | 0 | 0 | 0 | 0 | 0 | 0 | 0 | 0 | 0 | 0 | 0 | 0 | 2 | 0 | 0 | 0 |
| 2917 |                                                             | 0 |   |   |   |   |   |   |   |   |   |   |   |   |   |   |   |   |   |
| 8    | Hodgkin's disease, nodular sclerosis                        | 0 | 0 | 0 | 0 | 0 | 0 | 0 | 0 | 0 | 0 | 0 | 0 | 0 | 0 | 2 | 0 | 0 | 0 |
| 2987 |                                                             | 0 |   |   |   |   |   |   |   |   |   |   |   |   |   |   |   |   |   |
| 6    | Hodgkin's, lymphocytic-histiocytic predominance NOS         | 0 | 0 | 0 | 0 | 0 | 0 | 0 | 0 | 0 | 0 | 0 | 0 | 0 | 0 | 2 | 0 | 0 | 0 |
| 3064 |                                                             | 0 |   |   |   |   |   |   |   |   |   |   |   |   |   |   |   |   |   |
| 6    | Malignant neoplasm lymphatic or haematopoietic tissue OS    | 0 | 0 | 0 | 0 | 0 | 0 | 0 | 0 | 0 | 0 | 0 | 0 | 0 | 0 | 2 | 0 | 0 | 0 |
| 3132 |                                                             | 0 |   |   |   |   |   |   |   |   |   |   |   |   |   |   |   |   |   |
| 4    | Mast cell malignancy of lymph nodes of multiple sites       | 0 | 0 | 0 | 0 | 0 | 0 | 0 | 0 | 0 | 0 | 0 | 0 | 0 | 0 | 2 | 0 | 0 | 0 |
| 3149 |                                                             | 0 |   |   |   |   |   |   |   |   |   |   |   |   |   |   |   |   |   |
| 2    | [M] Monocytoid B-cell lymphoma                              | 0 | 0 | 0 | 0 | 0 | 0 | 0 | 0 | 0 | 0 | 0 | 0 | 0 | 0 | 2 | 0 | 0 | 0 |
| 3153 |                                                             | 0 |   |   |   |   |   |   |   |   |   |   |   |   |   |   |   |   |   |
| 7    | [M]Hodgkin,s disease, lymphocytic predominance, nodular     | 0 | 0 | 0 | 0 | 0 | 0 | 0 | 0 | 0 | 0 | 0 | 0 | 0 | 0 | 2 | 0 | 0 | 0 |
| 3157 |                                                             | 0 |   |   |   |   |   |   |   |   |   |   |   |   |   |   |   |   |   |
| 6    | Other types of follicular non-Hodgkin's lymphoma            | 0 | 0 | 0 | 0 | 0 | 0 | 0 | 0 | 0 | 0 | 0 | 0 | 0 | 0 | 2 | 0 | 0 | 0 |
| 3172 |                                                             | 0 |   |   |   |   |   |   |   |   |   |   |   |   |   |   |   |   |   |
| 6    | [M]Malignant lymphoma, small cleaved cell, diffuse          | 0 | 0 | 0 | 0 | 0 | 0 | 0 | 0 | 0 | 0 | 0 | 0 | 0 | 0 | 2 | 0 | 0 | 0 |
| 3174 |                                                             | 0 |   |   |   |   |   |   |   |   |   |   |   |   |   |   |   |   |   |
| 1    | [M]Hodgkin,s disease, nodular sclerosis, lymphocytic deplet | 0 | 0 | 0 | 0 | 0 | 0 | 0 | 0 | 0 | 0 | 0 | 0 | 0 | 0 | 2 | 0 | 0 | 0 |
| 3174 |                                                             | 0 |   |   |   |   |   |   |   |   |   |   |   |   |   |   |   |   |   |
| 9    | [M]Monocytoid B-cell lymphoma                               | 0 | 0 | 0 | 0 | 0 | 0 | 0 | 0 | 0 | 0 | 0 | 0 | 0 | 0 | 2 | 0 | 0 | 0 |
| 3179 |                                                             | 0 |   |   |   |   |   |   |   |   |   |   |   |   |   |   |   |   |   |
| 4    | Unspecified B-cell non-Hodgkin's lymphoma                   | 0 | 0 | 0 | 0 | 0 | 0 | 0 | 0 | 0 | 0 | 0 | 0 | 0 | 0 | 2 | 0 | 0 | 0 |
| 3224 |                                                             | 0 |   |   |   |   |   |   |   |   |   |   |   |   |   |   |   |   |   |
| 0    | Lymphoma stage III                                          | 0 | 0 | 0 | 0 | 0 | 0 | 0 | 0 | 0 | 0 | 0 | 0 | 0 | 0 | 2 | 0 | 0 | 0 |
| 3333 |                                                             | 0 |   |   |   |   |   |   |   |   |   |   |   |   |   |   |   |   |   |
| 3    | Other malignant neoplasm of lymphoid and histiocytic tissue | 0 | 0 | 0 | 0 | 0 | 0 | 0 | 0 | 0 | 0 | 0 | 0 | 0 | 0 | 2 | 0 | 0 | 0 |
| 3386 |                                                             | 0 |   |   |   |   |   |   |   |   |   |   |   |   |   |   |   |   |   |
| 9    | [M]Malignant lymphoma, large cell, diffuse NOS              | 0 | 0 | 0 | 0 | 0 | 0 | 0 | 0 | 0 | 0 | 0 | 0 | 0 | 0 | 2 | 0 | 0 | 0 |
| 3408 |                                                             | 0 |   |   |   |   |   |   |   |   |   |   |   |   |   |   |   |   |   |
| 9    | Malignant lymphoma NOS of lymph nodes of axilla and arm     | 0 | 0 | 0 | 0 | 0 | 0 | 0 | 0 | 0 | 0 | 0 | 0 | 0 | 0 | 2 | 0 | 0 | 0 |
| 3435 |                                                             | 0 |   |   |   |   |   |   |   |   |   |   |   |   |   |   |   |   |   |
| 2    | [M]Lymphoblastic lymphoma NOS                               | 0 | 0 | 0 | 0 | 0 | 0 | 0 | 0 | 0 | 0 | 0 | 0 | 0 | 0 | 2 | 0 | 0 | 0 |
| 3492 |                                                             | 0 |   |   |   |   |   |   |   |   |   |   |   |   |   |   |   |   |   |
| 6    | Letterer-Siwe disease                                       | 0 | 0 | 0 | 0 | 0 | 0 | 0 | 0 | 0 | 0 | 0 | 0 | 0 | 0 | 2 | 0 | 0 | 0 |
| 3501 |                                                             | 0 |   |   |   |   |   |   |   |   |   |   |   |   |   |   |   |   |   |
| 4    | Sezary's disease                                            | 0 | 0 | 0 | 0 | 0 | 0 | 0 | 0 | 0 | 0 | 0 | 0 | 0 | 0 | 2 | 0 | 0 | 0 |
| 3611 |                                                             | 0 |   |   |   |   |   |   |   |   |   |   |   |   |   |   |   |   |   |
| 4    | [M]Malignant lymphoma NOS                                   | 0 | 0 | 0 | 0 | 0 | 0 | 0 | 0 | 0 | 0 | 0 | 0 | 0 | 0 | 2 | 0 | 0 | 0 |
| 3673 |                                                             | 0 |   |   |   |   |   |   |   |   |   |   |   |   |   |   |   |   |   |
| 6    | Histiocytosis X , unspecified                               | 0 | 0 | 0 | 0 | 0 | 0 | 0 | 0 | 0 | 0 | 0 | 0 | 0 | 0 | 2 | 0 | 0 | 0 |
| 3711 |                                                             | 0 |   |   |   |   |   |   |   |   |   |   |   |   |   |   |   |   |   |
| 2    | Malignant neoplasm of histiocytic tissue                    | 0 | 0 | 0 | 0 | 0 | 0 | 0 | 0 | 0 | 0 | 0 | 0 | 0 | 0 | 2 | 0 | 0 | 0 |

|      |   |                                                             |   |   |   |   |   |   |   |   |   |   |   |   |   |   |   |   |   |   |
|------|---|-------------------------------------------------------------|---|---|---|---|---|---|---|---|---|---|---|---|---|---|---|---|---|---|
| 3800 | 5 | Mycosis fungoides NOS                                       | 0 | 0 | 0 | 0 | 0 | 0 | 0 | 0 | 0 | 0 | 0 | 0 | 0 | 0 | 2 | 0 | 0 | 0 |
| 3893 | 9 | Hodgkin's disease, lymphocytic-histiocytic predominance     | 0 | 0 | 0 | 0 | 0 | 0 | 0 | 0 | 0 | 0 | 0 | 0 | 0 | 0 | 2 | 0 | 0 | 0 |
| 3979 | 8 | Diffuse non-Hodgkin's lymphoma, unspecified                 | 0 | 0 | 0 | 0 | 0 | 0 | 0 | 0 | 0 | 0 | 0 | 0 | 0 | 0 | 2 | 0 | 0 | 0 |
| 3988 | 3 | [M]Malig lymph, follicular centre cell, cleaved, follicular | 0 | 0 | 0 | 0 | 0 | 0 | 0 | 0 | 0 | 0 | 0 | 0 | 0 | 0 | 2 | 0 | 0 | 0 |
| 3990 | 6 | [M]Malignant lymphoma, centrocytic                          | 0 | 0 | 0 | 0 | 0 | 0 | 0 | 0 | 0 | 0 | 0 | 0 | 0 | 0 | 2 | 0 | 0 | 0 |
| 4000 | 0 | Langerhans' cell histiocytosis                              | 0 | 0 | 0 | 0 | 0 | 0 | 0 | 0 | 0 | 0 | 0 | 0 | 0 | 0 | 2 | 0 | 0 | 0 |
| 4050 | 8 | [M]Hodgkin,s disease, nodular sclerosis, lymphocytic predom | 0 | 0 | 0 | 0 | 0 | 0 | 0 | 0 | 0 | 0 | 0 | 0 | 0 | 0 | 2 | 0 | 0 | 0 |
| 4051 | 3 | [M]Lymphoma, nodular or follicular NOS                      | 0 | 0 | 0 | 0 | 0 | 0 | 0 | 0 | 0 | 0 | 0 | 0 | 0 | 0 | 2 | 0 | 0 | 0 |
| 4074 | 0 | [X]Malignant neoplasms of lymphoid, haematopoietic and rela | 0 | 0 | 0 | 0 | 0 | 0 | 0 | 0 | 0 | 0 | 0 | 0 | 0 | 0 | 2 | 0 | 0 | 0 |
| 4076 | 6 | [M] Peripheral T-cell lymphoma NOS                          | 0 | 0 | 0 | 0 | 0 | 0 | 0 | 0 | 0 | 0 | 0 | 0 | 0 | 0 | 2 | 0 | 0 | 0 |
| 4099 | 1 | Lymphoma staging system                                     | 0 | 0 | 0 | 0 | 0 | 0 | 0 | 0 | 0 | 0 | 0 | 0 | 0 | 0 | 2 | 0 | 0 | 0 |
| 4136 | 9 | Lymphosarcoma and reticulosarcoma                           | 0 | 0 | 0 | 0 | 0 | 0 | 0 | 0 | 0 | 0 | 0 | 0 | 0 | 0 | 2 | 0 | 0 | 0 |
| 4175 | 4 | [M]Malignant lymphoma, lymphoplasmacytoid type              | 0 | 0 | 0 | 0 | 0 | 0 | 0 | 0 | 0 | 0 | 0 | 0 | 0 | 0 | 2 | 0 | 0 | 0 |
| 4184 | 1 | [M]Malignant lymphoma, follicular centre cell NOS           | 0 | 0 | 0 | 0 | 0 | 0 | 0 | 0 | 0 | 0 | 0 | 0 | 0 | 0 | 2 | 0 | 0 | 0 |
| 4219 | 8 | [M]Hodgkin's disease, nodular sclerosis NOS                 | 0 | 0 | 0 | 0 | 0 | 0 | 0 | 0 | 0 | 0 | 0 | 0 | 0 | 0 | 2 | 0 | 0 | 0 |
| 4246 | 1 | Hodgkin's disease NOS                                       | 0 | 0 | 0 | 0 | 0 | 0 | 0 | 0 | 0 | 0 | 0 | 0 | 0 | 0 | 2 | 0 | 0 | 0 |
| 4257 | 9 | Malignant lymphoma NOS of intra-abdominal lymph nodes       | 0 | 0 | 0 | 0 | 0 | 0 | 0 | 0 | 0 | 0 | 0 | 0 | 0 | 0 | 2 | 0 | 0 | 0 |
| 4276 | 9 | [M]Hodgkin's disease NOS                                    | 0 | 0 | 0 | 0 | 0 | 0 | 0 | 0 | 0 | 0 | 0 | 0 | 0 | 0 | 2 | 0 | 0 | 0 |
| 4341 | 5 | [X]Other Hodgkin's disease                                  | 0 | 0 | 0 | 0 | 0 | 0 | 0 | 0 | 0 | 0 | 0 | 0 | 0 | 0 | 2 | 0 | 0 | 0 |
| 4419 | 6 | Hodgkin's granuloma                                         | 0 | 0 | 0 | 0 | 0 | 0 | 0 | 0 | 0 | 0 | 0 | 0 | 0 | 0 | 2 | 0 | 0 | 0 |
| 4426 | 7 | Malignant histiocytosis                                     | 0 | 0 | 0 | 0 | 0 | 0 | 0 | 0 | 0 | 0 | 0 | 0 | 0 | 0 | 2 | 0 | 0 | 0 |
| 4431 | 8 | Oth and unspecif peripheral & cutaneous T-cell lymphomas    | 0 | 0 | 0 | 0 | 0 | 0 | 0 | 0 | 0 | 0 | 0 | 0 | 0 | 0 | 2 | 0 | 0 | 0 |
| 4526 | 4 | Nodular lymphoma of lymph nodes of head, face and neck      | 0 | 0 | 0 | 0 | 0 | 0 | 0 | 0 | 0 | 0 | 0 | 0 | 0 | 0 | 2 | 0 | 0 | 0 |
| 4576 | 8 | [M]Acute progressive histiocytosis X                        | 0 | 0 | 0 | 0 | 0 | 0 | 0 | 0 | 0 | 0 | 0 | 0 | 0 | 0 | 2 | 0 | 0 | 0 |

|           |                                                              |   |   |   |   |   |   |   |   |   |   |   |   |   |   |   |   |   |   |   |
|-----------|--------------------------------------------------------------|---|---|---|---|---|---|---|---|---|---|---|---|---|---|---|---|---|---|---|
| 4687<br>7 | [M]Malignant lymphoma, small lymphocytic NOS                 | 0 | 0 | 0 | 0 | 0 | 0 | 0 | 0 | 0 | 0 | 0 | 0 | 0 | 0 | 0 | 2 | 0 | 0 | 0 |
| 4693<br>1 | [M]Malignant lymphoma, stem cell type                        | 0 | 0 | 0 | 0 | 0 | 0 | 0 | 0 | 0 | 0 | 0 | 0 | 0 | 0 | 0 | 2 | 0 | 0 | 0 |
| 4696<br>7 | [M]Mycosis fungoides                                         | 0 | 0 | 0 | 0 | 0 | 0 | 0 | 0 | 0 | 0 | 0 | 0 | 0 | 0 | 0 | 2 | 0 | 0 | 0 |
| 4720<br>4 | Letterer-Siwe disease NOS                                    | 0 | 0 | 0 | 0 | 0 | 0 | 0 | 0 | 0 | 0 | 0 | 0 | 0 | 0 | 0 | 2 | 0 | 0 | 0 |
| 4733<br>0 | [M]HISTIOCYTIC MEDULLARY RETICULOSIS                         | 0 | 0 | 0 | 0 | 0 | 0 | 0 | 0 | 0 | 0 | 0 | 0 | 0 | 0 | 0 | 2 | 0 | 0 | 0 |
| 4825<br>3 | [M]Malignant lymphoma, immunoblastic type                    | 0 | 0 | 0 | 0 | 0 | 0 | 0 | 0 | 0 | 0 | 0 | 0 | 0 | 0 | 0 | 2 | 0 | 0 | 0 |
| 4925<br>3 | [M]Giant follicular lymphoma                                 | 0 | 0 | 0 | 0 | 0 | 0 | 0 | 0 | 0 | 0 | 0 | 0 | 0 | 0 | 0 | 2 | 0 | 0 | 0 |
| 4926<br>2 | Follicular non-Hodgkin's large cell lymphoma                 | 0 | 0 | 0 | 0 | 0 | 0 | 0 | 0 | 0 | 0 | 0 | 0 | 0 | 0 | 0 | 2 | 0 | 0 | 0 |
| 4930<br>1 | Malignant neoplasm lymphatic or haematopoietic tissue NOS    | 0 | 0 | 0 | 0 | 0 | 0 | 0 | 0 | 0 | 0 | 0 | 0 | 0 | 0 | 0 | 2 | 0 | 0 | 0 |
| 4960<br>5 | Hodgkin's disease, mixed cellularity                         | 0 | 0 | 0 | 0 | 0 | 0 | 0 | 0 | 0 | 0 | 0 | 0 | 0 | 0 | 0 | 2 | 0 | 0 | 0 |
| 4982<br>5 | [M]Reticulum cell sarcoma NOS                                | 0 | 0 | 0 | 0 | 0 | 0 | 0 | 0 | 0 | 0 | 0 | 0 | 0 | 0 | 0 | 2 | 0 | 0 | 0 |
| 5066<br>8 | Diffuse non-Hodgkin's small cell (diffuse) lymphoma          | 0 | 0 | 0 | 0 | 0 | 0 | 0 | 0 | 0 | 0 | 0 | 0 | 0 | 0 | 0 | 2 | 0 | 0 | 0 |
| 5069<br>5 | Diffuse non-Hodgkin mixed sml & lge cell (diffuse) lymphoma  | 0 | 0 | 0 | 0 | 0 | 0 | 0 | 0 | 0 | 0 | 0 | 0 | 0 | 0 | 0 | 2 | 0 | 0 | 0 |
| 5069<br>6 | Malignant lymphoma NOS of lymph nodes of head, face and neck | 0 | 0 | 0 | 0 | 0 | 0 | 0 | 0 | 0 | 0 | 0 | 0 | 0 | 0 | 0 | 2 | 0 | 0 | 0 |
| 5128<br>5 | [M]Hodgkin's disease, mixed cellularity                      | 0 | 0 | 0 | 0 | 0 | 0 | 0 | 0 | 0 | 0 | 0 | 0 | 0 | 0 | 0 | 2 | 0 | 0 | 0 |
| 5168<br>0 | [M]Malignant lymphoma, small cell, noncleaved, diffuse       | 0 | 0 | 0 | 0 | 0 | 0 | 0 | 0 | 0 | 0 | 0 | 0 | 0 | 0 | 0 | 2 | 0 | 0 | 0 |
| 5171<br>8 | Histiocytosis X , chronic                                    | 0 | 0 | 0 | 0 | 0 | 0 | 0 | 0 | 0 | 0 | 0 | 0 | 0 | 0 | 0 | 2 | 0 | 0 | 0 |
| 5185<br>2 | [M]Malig lymphoma, lymphocytic, intermediate different NOS   | 0 | 0 | 0 | 0 | 0 | 0 | 0 | 0 | 0 | 0 | 0 | 0 | 0 | 0 | 0 | 2 | 0 | 0 | 0 |
| 5189<br>5 | [M]Lymphoma, diffuse or NOS                                  | 0 | 0 | 0 | 0 | 0 | 0 | 0 | 0 | 0 | 0 | 0 | 0 | 0 | 0 | 0 | 2 | 0 | 0 | 0 |
| 5259<br>1 | [M]LYMPHOBLASTOMA NOS                                        | 0 | 0 | 0 | 0 | 0 | 0 | 0 | 0 | 0 | 0 | 0 | 0 | 0 | 0 | 0 | 2 | 0 | 0 | 0 |
| 5259<br>3 | [M] Gamma heavy chain disease                                | 0 | 0 | 0 | 0 | 0 | 0 | 0 | 0 | 0 | 0 | 0 | 0 | 0 | 0 | 0 | 2 | 0 | 0 | 0 |
| 5339<br>7 | Hodgkin's disease NOS                                        | 0 | 0 | 0 | 0 | 0 | 0 | 0 | 0 | 0 | 0 | 0 | 0 | 0 | 0 | 0 | 2 | 0 | 0 | 0 |
| 5355<br>1 | Diffuse non-Hodgkin's immunoblastic (diffuse) lymphoma       | 0 | 0 | 0 | 0 | 0 | 0 | 0 | 0 | 0 | 0 | 0 | 0 | 0 | 0 | 0 | 2 | 0 | 0 | 0 |
| 5408<br>3 | Letterer-Siwe disease of lymph nodes of multiple sites       | 0 | 0 | 0 | 0 | 0 | 0 | 0 | 0 | 0 | 0 | 0 | 0 | 0 | 0 | 0 | 2 | 0 | 0 | 0 |



|           |                                                             |   |   |   |   |   |   |   |   |   |   |   |   |   |   |   |   |   |   |
|-----------|-------------------------------------------------------------|---|---|---|---|---|---|---|---|---|---|---|---|---|---|---|---|---|---|
| 5419<br>0 | [M] Angioimmunoblastic lymphadenopathy                      | 0 | 0 | 0 | 0 | 0 | 0 | 0 | 0 | 0 | 0 | 0 | 0 | 0 | 0 | 2 | 0 | 0 | 0 |
| 5441<br>1 | Hand - Schuller - Christian disease                         | 0 | 0 | 0 | 0 | 0 | 0 | 0 | 0 | 0 | 0 | 0 | 0 | 0 | 0 | 2 | 0 | 0 | 0 |
| 5530<br>3 | Hodgkin's nodular sclerosis of head, face and neck          | 0 | 0 | 0 | 0 | 0 | 0 | 0 | 0 | 0 | 0 | 0 | 0 | 0 | 0 | 2 | 0 | 0 | 0 |
| 5604<br>1 | [M]Hodgkin's disease, lymphocytic predominance              | 0 | 0 | 0 | 0 | 0 | 0 | 0 | 0 | 0 | 0 | 0 | 0 | 0 | 0 | 2 | 0 | 0 | 0 |
| 5722<br>5 | Hodgkin's disease, nodular sclerosis of unspecified site    | 0 | 0 | 0 | 0 | 0 | 0 | 0 | 0 | 0 | 0 | 0 | 0 | 0 | 0 | 2 | 0 | 0 | 0 |
| 5742<br>7 | Malignant lymphoma NOS of unspecified site                  | 0 | 0 | 0 | 0 | 0 | 0 | 0 | 0 | 0 | 0 | 0 | 0 | 0 | 0 | 2 | 0 | 0 | 0 |
| 5750<br>9 | Waldenstrom's hypergammaglobulinaemic purpura               | 0 | 0 | 0 | 0 | 0 | 0 | 0 | 0 | 0 | 0 | 0 | 0 | 0 | 0 | 2 | 0 | 0 | 0 |
| 5754<br>4 | [M]True histiocytic lymphoma                                | 0 | 0 | 0 | 0 | 0 | 0 | 0 | 0 | 0 | 0 | 0 | 0 | 0 | 0 | 2 | 0 | 0 | 0 |
| 5773<br>7 | Lymphoepithelioid lymphoma                                  | 0 | 0 | 0 | 0 | 0 | 0 | 0 | 0 | 0 | 0 | 0 | 0 | 0 | 0 | 2 | 0 | 0 | 0 |
| 5801<br>5 | [M]Malignant lymphomatous polyposis                         | 0 | 0 | 0 | 0 | 0 | 0 | 0 | 0 | 0 | 0 | 0 | 0 | 0 | 0 | 2 | 0 | 0 | 0 |
| 5808<br>2 | Nodular lymphoma of lymph nodes of multiple sites           | 0 | 0 | 0 | 0 | 0 | 0 | 0 | 0 | 0 | 0 | 0 | 0 | 0 | 0 | 2 | 0 | 0 | 0 |
| 5868<br>4 | Hodgkin's mixed cellularity of intrathoracic lymph nodes    | 0 | 0 | 0 | 0 | 0 | 0 | 0 | 0 | 0 | 0 | 0 | 0 | 0 | 0 | 2 | 0 | 0 | 0 |
| 5887<br>1 | Malignant histiocytosis NOS                                 | 0 | 0 | 0 | 0 | 0 | 0 | 0 | 0 | 0 | 0 | 0 | 0 | 0 | 0 | 2 | 0 | 0 | 0 |
| 5895<br>3 | [M]Malig lymph,follicular centre cell,noncleaved,follicular | 0 | 0 | 0 | 0 | 0 | 0 | 0 | 0 | 0 | 0 | 0 | 0 | 0 | 0 | 2 | 0 | 0 | 0 |
| 5896<br>2 | Malignant immunoproliferative small intestinal disease      | 0 | 0 | 0 | 0 | 0 | 0 | 0 | 0 | 0 | 0 | 0 | 0 | 0 | 0 | 2 | 0 | 0 | 0 |
| 5911<br>5 | Burkitt's lymphoma of lymph nodes of head, face and neck    | 0 | 0 | 0 | 0 | 0 | 0 | 0 | 0 | 0 | 0 | 0 | 0 | 0 | 0 | 2 | 0 | 0 | 0 |
| 5959<br>3 | [M]Letterer - Siwe disease                                  | 0 | 0 | 0 | 0 | 0 | 0 | 0 | 0 | 0 | 0 | 0 | 0 | 0 | 0 | 2 | 0 | 0 | 0 |
| 5975<br>5 | Hodgkin's disease NOS of intrathoracic lymph nodes          | 0 | 0 | 0 | 0 | 0 | 0 | 0 | 0 | 0 | 0 | 0 | 0 | 0 | 0 | 2 | 0 | 0 | 0 |
| 5977<br>8 | Hodgkin's disease NOS of lymph nodes of head, face and neck | 0 | 0 | 0 | 0 | 0 | 0 | 0 | 0 | 0 | 0 | 0 | 0 | 0 | 0 | 2 | 0 | 0 | 0 |
| 6009<br>2 | Malignant lymphoma NOS of spleen                            | 0 | 0 | 0 | 0 | 0 | 0 | 0 | 0 | 0 | 0 | 0 | 0 | 0 | 0 | 2 | 0 | 0 | 0 |
| 6024<br>2 | Reticulosarcoma of unspecified site                         | 0 | 0 | 0 | 0 | 0 | 0 | 0 | 0 | 0 | 0 | 0 | 0 | 0 | 0 | 2 | 0 | 0 | 0 |
| 6027<br>5 | [M]Malignant lymphoma, centroblastic type NOS               | 0 | 0 | 0 | 0 | 0 | 0 | 0 | 0 | 0 | 0 | 0 | 0 | 0 | 0 | 2 | 0 | 0 | 0 |
| 6050<br>4 | [M]Lymphocytic lymphosarcoma NOS                            | 0 | 0 | 0 | 0 | 0 | 0 | 0 | 0 | 0 | 0 | 0 | 0 | 0 | 0 | 2 | 0 | 0 | 0 |
| 6091<br>8 | Lymphoma stage I                                            | 0 | 0 | 0 | 0 | 0 | 0 | 0 | 0 | 0 | 0 | 0 | 0 | 0 | 0 | 2 | 0 | 0 | 0 |

|       |                                                                  |   |   |   |   |   |   |   |   |   |   |   |   |   |   |   |   |   |   |
|-------|------------------------------------------------------------------|---|---|---|---|---|---|---|---|---|---|---|---|---|---|---|---|---|---|
| 61149 | Hodgkin's nodular sclerosis of intra-abdominal lymph nodes       | 0 | 0 | 0 | 0 | 0 | 0 | 0 | 0 | 0 | 0 | 0 | 0 | 0 | 0 | 2 | 0 | 0 | 0 |
| 61251 | [M]Malignant lymphoma,lymphocytic,intermediate diffiern, diffuse | 0 | 0 | 0 | 0 | 0 | 0 | 0 | 0 | 0 | 0 | 0 | 0 | 0 | 0 | 2 | 0 | 0 | 0 |
| 61662 | Hodgkin's disease NOS, unspecified site                          | 0 | 0 | 0 | 0 | 0 | 0 | 0 | 0 | 0 | 0 | 0 | 0 | 0 | 0 | 2 | 0 | 0 | 0 |
| 61997 | [M]Hodgkin's disease NOS                                         | 0 | 0 | 0 | 0 | 0 | 0 | 0 | 0 | 0 | 0 | 0 | 0 | 0 | 0 | 2 | 0 | 0 | 0 |
| 62380 | Lymphosarcoma of intrathoracic lymph nodes                       | 0 | 0 | 0 | 0 | 0 | 0 | 0 | 0 | 0 | 0 | 0 | 0 | 0 | 0 | 2 | 0 | 0 | 0 |
| 62437 | Malignant reticulosis                                            | 0 | 0 | 0 | 0 | 0 | 0 | 0 | 0 | 0 | 0 | 0 | 0 | 0 | 0 | 2 | 0 | 0 | 0 |
| 63054 | Hodgkin's disease, nodular sclerosis NOS                         | 0 | 0 | 0 | 0 | 0 | 0 | 0 | 0 | 0 | 0 | 0 | 0 | 0 | 0 | 2 | 0 | 0 | 0 |
| 63105 | Malignant lymphoma NOS of lymph node inguinal region and leg     | 0 | 0 | 0 | 0 | 0 | 0 | 0 | 0 | 0 | 0 | 0 | 0 | 0 | 0 | 2 | 0 | 0 | 0 |
| 63239 | [M]Malignant histiocytosis                                       | 0 | 0 | 0 | 0 | 0 | 0 | 0 | 0 | 0 | 0 | 0 | 0 | 0 | 0 | 2 | 0 | 0 | 0 |
| 63375 | [X]Unspecified B-cell non-Hodgkin's lymphoma                     | 0 | 0 | 0 | 0 | 0 | 0 | 0 | 0 | 0 | 0 | 0 | 0 | 0 | 0 | 2 | 0 | 0 | 0 |
| 63625 | Hodgkin's lymphocytic depletion lymph nodes axilla and arm       | 0 | 0 | 0 | 0 | 0 | 0 | 0 | 0 | 0 | 0 | 0 | 0 | 0 | 0 | 2 | 0 | 0 | 0 |
| 63699 | [M]Malignant lymphoma, nodular NOS                               | 0 | 0 | 0 | 0 | 0 | 0 | 0 | 0 | 0 | 0 | 0 | 0 | 0 | 0 | 2 | 0 | 0 | 0 |
| 63723 | Lymphosarcoma NOS                                                | 0 | 0 | 0 | 0 | 0 | 0 | 0 | 0 | 0 | 0 | 0 | 0 | 0 | 0 | 2 | 0 | 0 | 0 |
| 63973 | [M]Microglioma                                                   | 0 | 0 | 0 | 0 | 0 | 0 | 0 | 0 | 0 | 0 | 0 | 0 | 0 | 0 | 2 | 0 | 0 | 0 |
| 63994 | [M]Malignant lymphoma, large cell, cleaved, diffuse              | 0 | 0 | 0 | 0 | 0 | 0 | 0 | 0 | 0 | 0 | 0 | 0 | 0 | 0 | 2 | 0 | 0 | 0 |
| 64036 | Hodgkin's sarcoma                                                | 0 | 0 | 0 | 0 | 0 | 0 | 0 | 0 | 0 | 0 | 0 | 0 | 0 | 0 | 2 | 0 | 0 | 0 |
| 64336 | [X]Other specified types of non-Hodgkin's lymphoma               | 0 | 0 | 0 | 0 | 0 | 0 | 0 | 0 | 0 | 0 | 0 | 0 | 0 | 0 | 2 | 0 | 0 | 0 |
| 64343 | [M]Hodgkin,s disease, nodular sclerosis, mixed cellularity       | 0 | 0 | 0 | 0 | 0 | 0 | 0 | 0 | 0 | 0 | 0 | 0 | 0 | 0 | 2 | 0 | 0 | 0 |
| 64427 | Unspec malign neop lymphoid/histiocytic lymph node head/neck     | 0 | 0 | 0 | 0 | 0 | 0 | 0 | 0 | 0 | 0 | 0 | 0 | 0 | 0 | 2 | 0 | 0 | 0 |
| 64515 | [X]Diffuse non-Hodgkin's lymphoma, unspecified                   | 0 | 0 | 0 | 0 | 0 | 0 | 0 | 0 | 0 | 0 | 0 | 0 | 0 | 0 | 2 | 0 | 0 | 0 |
| 64670 | Lymphosarcoma of intra-abdominal lymph nodes                     | 0 | 0 | 0 | 0 | 0 | 0 | 0 | 0 | 0 | 0 | 0 | 0 | 0 | 0 | 2 | 0 | 0 | 0 |
| 64947 | [M]Brill - Symmers' disease                                      | 0 | 0 | 0 | 0 | 0 | 0 | 0 | 0 | 0 | 0 | 0 | 0 | 0 | 0 | 2 | 0 | 0 | 0 |
| 65180 | Diffuse non-Hodgkin's lymphoma undifferentiated (diffuse)        | 0 | 0 | 0 | 0 | 0 | 0 | 0 | 0 | 0 | 0 | 0 | 0 | 0 | 0 | 2 | 0 | 0 | 0 |

|           |                                                              |   |   |   |   |   |   |   |   |   |   |   |   |   |   |   |   |   |   |
|-----------|--------------------------------------------------------------|---|---|---|---|---|---|---|---|---|---|---|---|---|---|---|---|---|---|
| 6543<br>4 | Malignant neoplasms of lymphoid and histiocytic tissue NOS   | 0 | 0 | 0 | 0 | 0 | 0 | 0 | 0 | 0 | 0 | 0 | 0 | 0 | 0 | 2 | 0 | 0 | 0 |
| 6548<br>3 | Hodgkin's nodular sclerosis of lymph nodes of axilla and arm | 0 | 0 | 0 | 0 | 0 | 0 | 0 | 0 | 0 | 0 | 0 | 0 | 0 | 0 | 2 | 0 | 0 | 0 |
| 6548<br>9 | Hodgkin's paraganuloma                                       | 0 | 0 | 0 | 0 | 0 | 0 | 0 | 0 | 0 | 0 | 0 | 0 | 0 | 0 | 2 | 0 | 0 | 0 |
| 6558<br>4 | [M]Hodgkin's disease, lymphocytic predominance, diffuse      | 0 | 0 | 0 | 0 | 0 | 0 | 0 | 0 | 0 | 0 | 0 | 0 | 0 | 0 | 2 | 0 | 0 | 0 |
| 6564<br>2 | Malignant histiocytosis of intra-abdominal lymph nodes       | 0 | 0 | 0 | 0 | 0 | 0 | 0 | 0 | 0 | 0 | 0 | 0 | 0 | 0 | 2 | 0 | 0 | 0 |
| 6570<br>1 | Nodular lymphoma NOS                                         | 0 | 0 | 0 | 0 | 0 | 0 | 0 | 0 | 0 | 0 | 0 | 0 | 0 | 0 | 2 | 0 | 0 | 0 |
| 6632<br>7 | Nodular lymphoma of unspecified site                         | 0 | 0 | 0 | 0 | 0 | 0 | 0 | 0 | 0 | 0 | 0 | 0 | 0 | 0 | 2 | 0 | 0 | 0 |
| 6660<br>3 | [M]Malig lymphoma, follicular centre cell, non-cleaved NOS   | 0 | 0 | 0 | 0 | 0 | 0 | 0 | 0 | 0 | 0 | 0 | 0 | 0 | 0 | 2 | 0 | 0 | 0 |
| 6720<br>3 | [M]Lymphoblastic lymphosarcoma NOS                           | 0 | 0 | 0 | 0 | 0 | 0 | 0 | 0 | 0 | 0 | 0 | 0 | 0 | 0 | 2 | 0 | 0 | 0 |
| 6733<br>9 | [M]MALIGNANT MASTOCYTOSIS                                    | 0 | 0 | 0 | 0 | 0 | 0 | 0 | 0 | 0 | 0 | 0 | 0 | 0 | 0 | 2 | 0 | 0 | 0 |
| 6750<br>6 | Hodgkin's nodular sclerosis of intrathoracic lymph nodes     | 0 | 0 | 0 | 0 | 0 | 0 | 0 | 0 | 0 | 0 | 0 | 0 | 0 | 0 | 2 | 0 | 0 | 0 |
| 6751<br>8 | [X]Other types of follicular non-Hodgkin's lymphoma          | 0 | 0 | 0 | 0 | 0 | 0 | 0 | 0 | 0 | 0 | 0 | 0 | 0 | 0 | 2 | 0 | 0 | 0 |
| 6770<br>3 | Hodgkin's disease, lymphocytic depletion                     | 0 | 0 | 0 | 0 | 0 | 0 | 0 | 0 | 0 | 0 | 0 | 0 | 0 | 0 | 2 | 0 | 0 | 0 |
| 6803<br>9 | Hodgkin's sarcoma of lymph nodes of axilla and upper limb    | 0 | 0 | 0 | 0 | 0 | 0 | 0 | 0 | 0 | 0 | 0 | 0 | 0 | 0 | 2 | 0 | 0 | 0 |
| 6833<br>0 | Hodgkin's, lymphocytic-histiocytic pred of head, face, neck  | 0 | 0 | 0 | 0 | 0 | 0 | 0 | 0 | 0 | 0 | 0 | 0 | 0 | 0 | 2 | 0 | 0 | 0 |
| 6896<br>4 | [M]Malignant lymphoma, centroblastic-centrocytic, diffuse    | 0 | 0 | 0 | 0 | 0 | 0 | 0 | 0 | 0 | 0 | 0 | 0 | 0 | 0 | 2 | 0 | 0 | 0 |
| 6930<br>1 | [M]Malignant lymphoma, convoluted cell type NOS              | 0 | 0 | 0 | 0 | 0 | 0 | 0 | 0 | 0 | 0 | 0 | 0 | 0 | 0 | 2 | 0 | 0 | 0 |
| 6949<br>7 | Malignant histiocytosis of unspecified site                  | 0 | 0 | 0 | 0 | 0 | 0 | 0 | 0 | 0 | 0 | 0 | 0 | 0 | 0 | 2 | 0 | 0 | 0 |
| 6998<br>0 | [M]Malignant lymphoma, lymphocytic, well differentiated NOS  | 0 | 0 | 0 | 0 | 0 | 0 | 0 | 0 | 0 | 0 | 0 | 0 | 0 | 0 | 2 | 0 | 0 | 0 |
| 7037<br>4 | Reticulosarcoma of intra-abdominal lymph nodes               | 0 | 0 | 0 | 0 | 0 | 0 | 0 | 0 | 0 | 0 | 0 | 0 | 0 | 0 | 2 | 0 | 0 | 0 |
| 7050<br>9 | Diffuse non-Hodgkin's centroblastic lymphoma                 | 0 | 0 | 0 | 0 | 0 | 0 | 0 | 0 | 0 | 0 | 0 | 0 | 0 | 0 | 2 | 0 | 0 | 0 |
| 7071<br>6 | Immunoproliferative neoplasm                                 | 0 | 0 | 0 | 0 | 0 | 0 | 0 | 0 | 0 | 0 | 0 | 0 | 0 | 0 | 2 | 0 | 0 | 0 |
| 7074<br>0 | [M]Malignant reticulosis                                     | 0 | 0 | 0 | 0 | 0 | 0 | 0 | 0 | 0 | 0 | 0 | 0 | 0 | 0 | 2 | 0 | 0 | 0 |
| 7084<br>2 | Follicular non-Hodg mixed sml cleavd & lge cell lymphoma     | 0 | 0 | 0 | 0 | 0 | 0 | 0 | 0 | 0 | 0 | 0 | 0 | 0 | 0 | 2 | 0 | 0 | 0 |

|           |                                                              |   |   |   |   |   |   |   |   |   |   |   |   |   |   |   |   |   |   |   |
|-----------|--------------------------------------------------------------|---|---|---|---|---|---|---|---|---|---|---|---|---|---|---|---|---|---|---|
| 7103<br>1 | Reticulosarcoma of lymph nodes of head, face and neck        | 0 | 0 | 0 | 0 | 0 | 0 | 0 | 0 | 0 | 0 | 0 | 0 | 0 | 0 | 0 | 2 | 0 | 0 | 0 |
| 7111<br>7 | [M]Malignant lymphoma, undifferentiated cell type NOS        | 0 | 0 | 0 | 0 | 0 | 0 | 0 | 0 | 0 | 0 | 0 | 0 | 0 | 0 | 0 | 2 | 0 | 0 | 0 |
| 7114<br>2 | Hodgkin's, lymphocytic-histiocytic predominance unspc site   | 0 | 0 | 0 | 0 | 0 | 0 | 0 | 0 | 0 | 0 | 0 | 0 | 0 | 0 | 0 | 2 | 0 | 0 | 0 |
| 7123<br>8 | Lymphosarcoma of lymph nodes of head, face and neck          | 0 | 0 | 0 | 0 | 0 | 0 | 0 | 0 | 0 | 0 | 0 | 0 | 0 | 0 | 0 | 2 | 0 | 0 | 0 |
| 7126<br>2 | Malignant lymphoma NOS of intrapelvic lymph nodes            | 0 | 0 | 0 | 0 | 0 | 0 | 0 | 0 | 0 | 0 | 0 | 0 | 0 | 0 | 0 | 2 | 0 | 0 | 0 |
| 7130<br>4 | Burkitt's lymphoma NOS                                       | 0 | 0 | 0 | 0 | 0 | 0 | 0 | 0 | 0 | 0 | 0 | 0 | 0 | 0 | 0 | 2 | 0 | 0 | 0 |
| 7160<br>9 | Unspec malig neop lymphoid/histiocytic nodes inguinal/leg    | 0 | 0 | 0 | 0 | 0 | 0 | 0 | 0 | 0 | 0 | 0 | 0 | 0 | 0 | 0 | 2 | 0 | 0 | 0 |
| 7161<br>9 | [M]Malignant lymphoma, large cell, noncleaved, diffuse       | 0 | 0 | 0 | 0 | 0 | 0 | 0 | 0 | 0 | 0 | 0 | 0 | 0 | 0 | 0 | 2 | 0 | 0 | 0 |
| 7162<br>5 | Lymphosarcoma of unspecified site                            | 0 | 0 | 0 | 0 | 0 | 0 | 0 | 0 | 0 | 0 | 0 | 0 | 0 | 0 | 0 | 2 | 0 | 0 | 0 |
| 7165<br>2 | [M]Malignant lymphoma, mixed small and large cell, diffuse   | 0 | 0 | 0 | 0 | 0 | 0 | 0 | 0 | 0 | 0 | 0 | 0 | 0 | 0 | 0 | 2 | 0 | 0 | 0 |
| 7167<br>2 | Lymphoma stage IV                                            | 0 | 0 | 0 | 0 | 0 | 0 | 0 | 0 | 0 | 0 | 0 | 0 | 0 | 0 | 0 | 2 | 0 | 0 | 0 |
| 7199<br>4 | Macroglobulinaemia NOS                                       | 0 | 0 | 0 | 0 | 0 | 0 | 0 | 0 | 0 | 0 | 0 | 0 | 0 | 0 | 0 | 2 | 0 | 0 | 0 |
| 7219<br>6 | [M]Malignant lymphoma, lymphocytic, poorly different NOS     | 0 | 0 | 0 | 0 | 0 | 0 | 0 | 0 | 0 | 0 | 0 | 0 | 0 | 0 | 0 | 2 | 0 | 0 | 0 |
| 7224<br>1 | [M]Prolymphocytic lymphosarcoma                              | 0 | 0 | 0 | 0 | 0 | 0 | 0 | 0 | 0 | 0 | 0 | 0 | 0 | 0 | 0 | 2 | 0 | 0 | 0 |
| 7243<br>3 | [M]Reticulosarcoma NOS                                       | 0 | 0 | 0 | 0 | 0 | 0 | 0 | 0 | 0 | 0 | 0 | 0 | 0 | 0 | 0 | 2 | 0 | 0 | 0 |
| 7250<br>0 | [X]Mal neoplasm/lymphoid,haematopoietic+related tissu,unspcf | 0 | 0 | 0 | 0 | 0 | 0 | 0 | 0 | 0 | 0 | 0 | 0 | 0 | 0 | 0 | 2 | 0 | 0 | 0 |
| 7271<br>4 | Mycosis fungoides of lymph nodes of inguinal region and leg  | 0 | 0 | 0 | 0 | 0 | 0 | 0 | 0 | 0 | 0 | 0 | 0 | 0 | 0 | 0 | 2 | 0 | 0 | 0 |
| 7272<br>5 | Malignant lymphoma NOS of intrathoracic lymph nodes          | 0 | 0 | 0 | 0 | 0 | 0 | 0 | 0 | 0 | 0 | 0 | 0 | 0 | 0 | 0 | 2 | 0 | 0 | 0 |
| 7353<br>2 | Hodgkin's, lymphocytic-histiocytic pred intra-abdominal node | 0 | 0 | 0 | 0 | 0 | 0 | 0 | 0 | 0 | 0 | 0 | 0 | 0 | 0 | 0 | 2 | 0 | 0 | 0 |
| 8923<br>0 | [M]Hodgkin's granuloma                                       | 0 | 0 | 0 | 0 | 0 | 0 | 0 | 0 | 0 | 0 | 0 | 0 | 0 | 0 | 0 | 2 | 0 | 0 | 0 |
| 8965<br>7 | Malignant mast cell tumour NOS                               | 0 | 0 | 0 | 0 | 0 | 0 | 0 | 0 | 0 | 0 | 0 | 0 | 0 | 0 | 0 | 2 | 0 | 0 | 0 |
| 9020<br>1 | T-zone lymphoma                                              | 0 | 0 | 0 | 0 | 0 | 0 | 0 | 0 | 0 | 0 | 0 | 0 | 0 | 0 | 0 | 2 | 0 | 0 | 0 |
| 9167<br>4 | Mycosis fungoides of intra-abdominal lymph nodes             | 0 | 0 | 0 | 0 | 0 | 0 | 0 | 0 | 0 | 0 | 0 | 0 | 0 | 0 | 0 | 2 | 0 | 0 | 0 |

|           |                                                              |   |   |   |   |   |   |   |   |   |   |   |   |   |   |   |   |   |   |
|-----------|--------------------------------------------------------------|---|---|---|---|---|---|---|---|---|---|---|---|---|---|---|---|---|---|
| 9190<br>0 | Hodgkin's disease NOS of lymph nodes of axilla and arm       | 0 | 0 | 0 | 0 | 0 | 0 | 0 | 0 | 0 | 0 | 0 | 0 | 0 | 0 | 2 | 0 | 0 | 0 |
| 9206<br>8 | Nodular lymphoma of intra-abdominal lymph nodes              | 0 | 0 | 0 | 0 | 0 | 0 | 0 | 0 | 0 | 0 | 0 | 0 | 0 | 0 | 2 | 0 | 0 | 0 |
| 9224<br>5 | Hodgkin's, lymphocytic-histiocytic pred intrathoracic nodes  | 0 | 0 | 0 | 0 | 0 | 0 | 0 | 0 | 0 | 0 | 0 | 0 | 0 | 0 | 2 | 0 | 0 | 0 |
| 9238<br>0 | Burkitt's lymphoma of lymph nodes of inguinal region and leg | 0 | 0 | 0 | 0 | 0 | 0 | 0 | 0 | 0 | 0 | 0 | 0 | 0 | 0 | 2 | 0 | 0 | 0 |
| 9338<br>4 | Unspec malig neop lymphoid/histiocytic of intrathoracic node | 0 | 0 | 0 | 0 | 0 | 0 | 0 | 0 | 0 | 0 | 0 | 0 | 0 | 0 | 2 | 0 | 0 | 0 |
| 9395<br>1 | Hodgkin's, lymphocytic-histiocytic pred inguinal and leg     | 0 | 0 | 0 | 0 | 0 | 0 | 0 | 0 | 0 | 0 | 0 | 0 | 0 | 0 | 2 | 0 | 0 | 0 |
| 9400<br>5 | Hodgkin's disease, mixed cellularity NOS                     | 0 | 0 | 0 | 0 | 0 | 0 | 0 | 0 | 0 | 0 | 0 | 0 | 0 | 0 | 2 | 0 | 0 | 0 |
| 9423<br>9 | [M]Mast cell sarcoma                                         | 0 | 0 | 0 | 0 | 0 | 0 | 0 | 0 | 0 | 0 | 0 | 0 | 0 | 0 | 2 | 0 | 0 | 0 |
| 9427<br>9 | Hodgkin's disease NOS of spleen                              | 0 | 0 | 0 | 0 | 0 | 0 | 0 | 0 | 0 | 0 | 0 | 0 | 0 | 0 | 2 | 0 | 0 | 0 |
| 9440<br>7 | Hodgkin's mixed cellularity of lymph nodes head, face, neck  | 0 | 0 | 0 | 0 | 0 | 0 | 0 | 0 | 0 | 0 | 0 | 0 | 0 | 0 | 2 | 0 | 0 | 0 |
| 9441<br>5 | Malignant histiocytosis of lymph nodes head, face and neck   | 0 | 0 | 0 | 0 | 0 | 0 | 0 | 0 | 0 | 0 | 0 | 0 | 0 | 0 | 2 | 0 | 0 | 0 |
| 9493<br>5 | Lymphoma stage II                                            | 0 | 0 | 0 | 0 | 0 | 0 | 0 | 0 | 0 | 0 | 0 | 0 | 0 | 0 | 2 | 0 | 0 | 0 |
| 9499<br>5 | Nodular lymphoma of lymph nodes of inguinal region and leg   | 0 | 0 | 0 | 0 | 0 | 0 | 0 | 0 | 0 | 0 | 0 | 0 | 0 | 0 | 2 | 0 | 0 | 0 |
| 9501<br>2 | Mycosis fungoides of lymph nodes of multiple sites           | 0 | 0 | 0 | 0 | 0 | 0 | 0 | 0 | 0 | 0 | 0 | 0 | 0 | 0 | 2 | 0 | 0 | 0 |
| 9504<br>9 | Hodgkin's lymphocytic depletion of unspecified site          | 0 | 0 | 0 | 0 | 0 | 0 | 0 | 0 | 0 | 0 | 0 | 0 | 0 | 0 | 2 | 0 | 0 | 0 |
| 9505<br>8 | Reticulosarcoma of spleen                                    | 0 | 0 | 0 | 0 | 0 | 0 | 0 | 0 | 0 | 0 | 0 | 0 | 0 | 0 | 2 | 0 | 0 | 0 |
| 9533<br>8 | Hodgkin's, lymphocytic-histiocytic pred intrapelvic nodes    | 0 | 0 | 0 | 0 | 0 | 0 | 0 | 0 | 0 | 0 | 0 | 0 | 0 | 0 | 2 | 0 | 0 | 0 |
| 9546<br>4 | [M]Mycosis fungoides                                         | 0 | 0 | 0 | 0 | 0 | 0 | 0 | 0 | 0 | 0 | 0 | 0 | 0 | 0 | 2 | 0 | 0 | 0 |
| 9554<br>5 | Maltoma                                                      | 0 | 0 | 0 | 0 | 0 | 0 | 0 | 0 | 0 | 0 | 0 | 0 | 0 | 0 | 2 | 0 | 0 | 0 |
| 9563<br>0 | True histiocytic lymphoma                                    | 0 | 0 | 0 | 0 | 0 | 0 | 0 | 0 | 0 | 0 | 0 | 0 | 0 | 0 | 2 | 0 | 0 | 0 |
| 9571<br>5 | Mucosa-associated lymphoma                                   | 0 | 0 | 0 | 0 | 0 | 0 | 0 | 0 | 0 | 0 | 0 | 0 | 0 | 0 | 2 | 0 | 0 | 0 |
| 9579<br>2 | Lymphoid and histiocytic malignancy NOS                      | 0 | 0 | 0 | 0 | 0 | 0 | 0 | 0 | 0 | 0 | 0 | 0 | 0 | 0 | 2 | 0 | 0 | 0 |
| 9594<br>9 | Mycosis fungoides of unspecified site                        | 0 | 0 | 0 | 0 | 0 | 0 | 0 | 0 | 0 | 0 | 0 | 0 | 0 | 0 | 2 | 0 | 0 | 0 |
| 9618<br>3 | [M]Hodgkin's disease,lymphocytic depletion,diffuse fibrosis  | 0 | 0 | 0 | 0 | 0 | 0 | 0 | 0 | 0 | 0 | 0 | 0 | 0 | 0 | 2 | 0 | 0 | 0 |

|            |                                                              |   |   |   |   |   |   |   |   |   |   |   |   |   |   |   |   |   |   |
|------------|--------------------------------------------------------------|---|---|---|---|---|---|---|---|---|---|---|---|---|---|---|---|---|---|
| 9637<br>9  | Mycosis fungoides of lymph nodes of axilla and upper limb    | 0 | 0 | 0 | 0 | 0 | 0 | 0 | 0 | 0 | 0 | 0 | 0 | 0 | 0 | 2 | 0 | 0 | 0 |
| 9757<br>7  | Burkitt's lymphoma of intra-abdominal lymph nodes            | 0 | 0 | 0 | 0 | 0 | 0 | 0 | 0 | 0 | 0 | 0 | 0 | 0 | 0 | 2 | 0 | 0 | 0 |
| 9774<br>6  | Hodgkin's disease NOS of lymph nodes of multiple sites       | 0 | 0 | 0 | 0 | 0 | 0 | 0 | 0 | 0 | 0 | 0 | 0 | 0 | 0 | 2 | 0 | 0 | 0 |
| 9775<br>6  | [M]Sezary's disease                                          | 0 | 0 | 0 | 0 | 0 | 0 | 0 | 0 | 0 | 0 | 0 | 0 | 0 | 0 | 2 | 0 | 0 | 0 |
| 9785<br>2  | [M]Malignant lymphoma, centroblastic type, follicular        | 0 | 0 | 0 | 0 | 0 | 0 | 0 | 0 | 0 | 0 | 0 | 0 | 0 | 0 | 2 | 0 | 0 | 0 |
| 9786<br>3  | Hodgkin's disease, mixed cellularity of unspecified site     | 0 | 0 | 0 | 0 | 0 | 0 | 0 | 0 | 0 | 0 | 0 | 0 | 0 | 0 | 2 | 0 | 0 | 0 |
| 9859<br>6  | [X]Other types of diffuse non-Hodgkin's lymphoma             | 0 | 0 | 0 | 0 | 0 | 0 | 0 | 0 | 0 | 0 | 0 | 0 | 0 | 0 | 2 | 0 | 0 | 0 |
| 9884<br>0  | Hodgkin's paraganuloma of intra-abdominal lymph nodes        | 0 | 0 | 0 | 0 | 0 | 0 | 0 | 0 | 0 | 0 | 0 | 0 | 0 | 0 | 2 | 0 | 0 | 0 |
| 9890<br>9  | Hodgkin's granuloma of lymph nodes of head, face and neck    | 0 | 0 | 0 | 0 | 0 | 0 | 0 | 0 | 0 | 0 | 0 | 0 | 0 | 0 | 2 | 0 | 0 | 0 |
| 9896<br>1  | [M]Malignant lymphoma, centroblastic-centrocytic, follicular | 0 | 0 | 0 | 0 | 0 | 0 | 0 | 0 | 0 | 0 | 0 | 0 | 0 | 0 | 2 | 0 | 0 | 0 |
| 9901<br>2  | Hodgkin's disease NOS of lymph nodes inguinal region and leg | 0 | 0 | 0 | 0 | 0 | 0 | 0 | 0 | 0 | 0 | 0 | 0 | 0 | 0 | 2 | 0 | 0 | 0 |
| 9906<br>7  | Gamma heavy chain disease                                    | 0 | 0 | 0 | 0 | 0 | 0 | 0 | 0 | 0 | 0 | 0 | 0 | 0 | 0 | 2 | 0 | 0 | 0 |
| 9920<br>0  | [M]Hodgkin's disease, nodular sclerosis, cellular phase      | 0 | 0 | 0 | 0 | 0 | 0 | 0 | 0 | 0 | 0 | 0 | 0 | 0 | 0 | 2 | 0 | 0 | 0 |
| 9924<br>0  | Reticulosarcoma NOS                                          | 0 | 0 | 0 | 0 | 0 | 0 | 0 | 0 | 0 | 0 | 0 | 0 | 0 | 0 | 2 | 0 | 0 | 0 |
| 9965<br>5  | [M]Lymphosarcoma NOS                                         | 0 | 0 | 0 | 0 | 0 | 0 | 0 | 0 | 0 | 0 | 0 | 0 | 0 | 0 | 2 | 0 | 0 | 0 |
| 9969<br>5  | [M]Mycosis fungoides NOS                                     | 0 | 0 | 0 | 0 | 0 | 0 | 0 | 0 | 0 | 0 | 0 | 0 | 0 | 0 | 2 | 0 | 0 | 0 |
| 9988<br>7  | Other specified reticulosarcoma or lymphosarcoma             | 0 | 0 | 0 | 0 | 0 | 0 | 0 | 0 | 0 | 0 | 0 | 0 | 0 | 0 | 2 | 0 | 0 | 0 |
| 9995<br>1  | Reticulosarcoma or lymphosarcoma NOS                         | 0 | 0 | 0 | 0 | 0 | 0 | 0 | 0 | 0 | 0 | 0 | 0 | 0 | 0 | 2 | 0 | 0 | 0 |
| 1000<br>06 | Burkitt's lymphoma of intrathoracic lymph nodes              | 0 | 0 | 0 | 0 | 0 | 0 | 0 | 0 | 0 | 0 | 0 | 0 | 0 | 0 | 2 | 0 | 0 | 0 |
| 1003<br>52 | Lymphosarcoma of lymph nodes of inguinal region and leg      | 0 | 0 | 0 | 0 | 0 | 0 | 0 | 0 | 0 | 0 | 0 | 0 | 0 | 0 | 2 | 0 | 0 | 0 |
| 1004<br>23 | Hodgkin's paraganuloma of lymph nodes of head, face, neck    | 0 | 0 | 0 | 0 | 0 | 0 | 0 | 0 | 0 | 0 | 0 | 0 | 0 | 0 | 2 | 0 | 0 | 0 |
| 1005<br>32 | Sezary's disease NOS                                         | 0 | 0 | 0 | 0 | 0 | 0 | 0 | 0 | 0 | 0 | 0 | 0 | 0 | 0 | 2 | 0 | 0 | 0 |
| 1005<br>44 | [M]Reticulosarcoma, nodular                                  | 0 | 0 | 0 | 0 | 0 | 0 | 0 | 0 | 0 | 0 | 0 | 0 | 0 | 0 | 2 | 0 | 0 | 0 |
| 1006<br>15 | Mast cell malignancy of lymph nodes inguinal region and leg  | 0 | 0 | 0 | 0 | 0 | 0 | 0 | 0 | 0 | 0 | 0 | 0 | 0 | 0 | 2 | 0 | 0 | 0 |

|            |                                                              |   |   |   |   |   |   |   |   |   |   |   |   |   |   |   |   |   |   |
|------------|--------------------------------------------------------------|---|---|---|---|---|---|---|---|---|---|---|---|---|---|---|---|---|---|
| 1011<br>14 | Diffuse non-Hodgkin's large cell lymphoma                    | 0 | 0 | 0 | 0 | 0 | 0 | 0 | 0 | 0 | 0 | 0 | 0 | 0 | 0 | 2 | 0 | 0 | 0 |
| 1013<br>50 | Alpha heavy chain disease                                    | 0 | 0 | 0 | 0 | 0 | 0 | 0 | 0 | 0 | 0 | 0 | 0 | 0 | 0 | 2 | 0 | 0 | 0 |
| 1014<br>29 | [M]Lymphogranuloma, malignant                                | 0 | 0 | 0 | 0 | 0 | 0 | 0 | 0 | 0 | 0 | 0 | 0 | 0 | 0 | 2 | 0 | 0 | 0 |
| 1014<br>65 | Unspec malig neop lymphoid/histiocytic of multiple sites     | 0 | 0 | 0 | 0 | 0 | 0 | 0 | 0 | 0 | 0 | 0 | 0 | 0 | 0 | 2 | 0 | 0 | 0 |
| 1015<br>30 | Hodgkin's disease, lymphocytic depletion NOS                 | 0 | 0 | 0 | 0 | 0 | 0 | 0 | 0 | 0 | 0 | 0 | 0 | 0 | 0 | 2 | 0 | 0 | 0 |
| 1017<br>15 | Hodgkin's disease, lymphocytic depletion of spleen           | 0 | 0 | 0 | 0 | 0 | 0 | 0 | 0 | 0 | 0 | 0 | 0 | 0 | 0 | 2 | 0 | 0 | 0 |
| 1021<br>58 | Letterer-Siwe disease of intrathoracic lymph nodes           | 0 | 0 | 0 | 0 | 0 | 0 | 0 | 0 | 0 | 0 | 0 | 0 | 0 | 0 | 2 | 0 | 0 | 0 |
| 1025<br>94 | Diffuse large B-cell lymphoma                                | 0 | 0 | 0 | 0 | 0 | 0 | 0 | 0 | 0 | 0 | 0 | 0 | 0 | 0 | 2 | 0 | 0 | 0 |
| 1026<br>88 | [X]Other malignant immunoproliferative diseases              | 0 | 0 | 0 | 0 | 0 | 0 | 0 | 0 | 0 | 0 | 0 | 0 | 0 | 0 | 2 | 0 | 0 | 0 |
| 1027<br>15 | LETTERER-SIWE DISEASE OF UNSPECIFIED SITES                   | 0 | 0 | 0 | 0 | 0 | 0 | 0 | 0 | 0 | 0 | 0 | 0 | 0 | 0 | 2 | 0 | 0 | 0 |
| 1032<br>45 | Lymphosarcoma of spleen                                      | 0 | 0 | 0 | 0 | 0 | 0 | 0 | 0 | 0 | 0 | 0 | 0 | 0 | 0 | 2 | 0 | 0 | 0 |
| 1033<br>53 | Unspec malig neop lymphoid/histiocytic intra-abdominal nodes | 0 | 0 | 0 | 0 | 0 | 0 | 0 | 0 | 0 | 0 | 0 | 0 | 0 | 0 | 2 | 0 | 0 | 0 |
| 1039<br>00 | Mast cell malignancy of unspecified site                     | 0 | 0 | 0 | 0 | 0 | 0 | 0 | 0 | 0 | 0 | 0 | 0 | 0 | 0 | 2 | 0 | 0 | 0 |
| 1041<br>52 | Follicular lymphoma                                          | 0 | 0 | 0 | 0 | 0 | 0 | 0 | 0 | 0 | 0 | 0 | 0 | 0 | 0 | 2 | 0 | 0 | 0 |
| 1042<br>91 | Hodgkin lymphoma                                             | 0 | 0 | 0 | 0 | 0 | 0 | 0 | 0 | 0 | 0 | 0 | 0 | 0 | 0 | 2 | 0 | 0 | 0 |
| 1043<br>86 | Small cell B-cell lymphoma                                   | 0 | 0 | 0 | 0 | 0 | 0 | 0 | 0 | 0 | 0 | 0 | 0 | 0 | 0 | 2 | 0 | 0 | 0 |
| 1043<br>91 | Non-Hodgkin lymphoma                                         | 0 | 0 | 0 | 0 | 0 | 0 | 0 | 0 | 0 | 0 | 0 | 0 | 0 | 0 | 2 | 0 | 0 | 0 |
| 1044<br>12 | Lymphoblastic (diffuse) lymphoma                             | 0 | 0 | 0 | 0 | 0 | 0 | 0 | 0 | 0 | 0 | 0 | 0 | 0 | 0 | 2 | 0 | 0 | 0 |
| 1044<br>84 | Other classical Hodgkin lymphoma                             | 0 | 0 | 0 | 0 | 0 | 0 | 0 | 0 | 0 | 0 | 0 | 0 | 0 | 0 | 2 | 0 | 0 | 0 |
| 1046<br>20 | Mantle cell lymphoma                                         | 0 | 0 | 0 | 0 | 0 | 0 | 0 | 0 | 0 | 0 | 0 | 0 | 0 | 0 | 2 | 0 | 0 | 0 |
| 1047<br>43 | Hodgkin's, lymphocytic-histiocytic pred of multiple sites    | 0 | 0 | 0 | 0 | 0 | 0 | 0 | 0 | 0 | 0 | 0 | 0 | 0 | 0 | 2 | 0 | 0 | 0 |
| 1047<br>90 | Lymphosarcoma of lymph nodes of multiple sites               | 0 | 0 | 0 | 0 | 0 | 0 | 0 | 0 | 0 | 0 | 0 | 0 | 0 | 0 | 2 | 0 | 0 | 0 |
| 1048<br>62 | Cutaneous T-cell lymphoma                                    | 0 | 0 | 0 | 0 | 0 | 0 | 0 | 0 | 0 | 0 | 0 | 0 | 0 | 0 | 2 | 0 | 0 | 0 |
| 1048<br>95 | Nodular lymphocyte predominant Hodgkin lymphoma              | 0 | 0 | 0 | 0 | 0 | 0 | 0 | 0 | 0 | 0 | 0 | 0 | 0 | 0 | 2 | 0 | 0 | 0 |

|      |                                                                 |   |   |   |   |   |   |   |   |   |   |   |   |   |   |   |   |   |   |
|------|-----------------------------------------------------------------|---|---|---|---|---|---|---|---|---|---|---|---|---|---|---|---|---|---|
| 1049 |                                                                 | 0 |   |   |   |   |   |   |   |   |   |   |   |   |   |   |   |   |   |
| 34   | Other mature T/NK-cell lymphoma                                 |   | 0 | 0 | 0 | 0 | 0 | 0 | 0 | 0 | 0 | 0 | 0 | 0 | 0 | 2 | 0 | 0 | 0 |
| 1050 |                                                                 | 0 |   |   |   |   |   |   |   |   |   |   |   |   |   |   |   |   |   |
| 20   | Follicular lymphoma grade 3a                                    |   | 0 | 0 | 0 | 0 | 0 | 0 | 0 | 0 | 0 | 0 | 0 | 0 | 0 | 2 | 0 | 0 | 0 |
| 1050 | [X]OTH SPCF MAL                                                 | 0 |   |   |   |   |   |   |   |   |   |   |   |   |   |   |   |   |   |
| 25   | NEOPLSM/LYMPHOID,HAEMATOPOIETIC+RLT<br>D TISSUE                 |   | 0 | 0 | 0 | 0 | 0 | 0 | 0 | 0 | 0 | 0 | 0 | 0 | 0 | 2 | 0 | 0 | 0 |
| 1050 |                                                                 | 0 |   |   |   |   |   |   |   |   |   |   |   |   |   |   |   |   |   |
| 38   | Mediastinal (thymic) large B-cell lymphoma                      |   | 0 | 0 | 0 | 0 | 0 | 0 | 0 | 0 | 0 | 0 | 0 | 0 | 0 | 2 | 0 | 0 | 0 |
| 1050 |                                                                 | 0 |   |   |   |   |   |   |   |   |   |   |   |   |   |   |   |   |   |
| 85   | T/NK-cell lymphoma                                              |   | 0 | 0 | 0 | 0 | 0 | 0 | 0 | 0 | 0 | 0 | 0 | 0 | 0 | 2 | 0 | 0 | 0 |
| 1050 |                                                                 | 0 |   |   |   |   |   |   |   |   |   |   |   |   |   |   |   |   |   |
| 95   | Follicular lymphoma grade 2                                     |   | 0 | 0 | 0 | 0 | 0 | 0 | 0 | 0 | 0 | 0 | 0 | 0 | 0 | 2 | 0 | 0 | 0 |
| 1052 |                                                                 | 0 |   |   |   |   |   |   |   |   |   |   |   |   |   |   |   |   |   |
| 03   | Nodular lymphoma of intrathoracic lymph<br>nodes                |   | 0 | 0 | 0 | 0 | 0 | 0 | 0 | 0 | 0 | 0 | 0 | 0 | 0 | 2 | 0 | 0 | 0 |
| 1053 |                                                                 | 0 |   |   |   |   |   |   |   |   |   |   |   |   |   |   |   |   |   |
| 75   | Blastic NK-cell lymphoma                                        |   | 0 | 0 | 0 | 0 | 0 | 0 | 0 | 0 | 0 | 0 | 0 | 0 | 0 | 2 | 0 | 0 | 0 |
| 1054 |                                                                 | 0 |   |   |   |   |   |   |   |   |   |   |   |   |   |   |   |   |   |
| 72   | Hodgkin's disease, nodular sclerosis of spleen                  |   | 0 | 0 | 0 | 0 | 0 | 0 | 0 | 0 | 0 | 0 | 0 | 0 | 0 | 2 | 0 | 0 | 0 |
| 1055 |                                                                 | 0 |   |   |   |   |   |   |   |   |   |   |   |   |   |   |   |   |   |
| 59   | Anaplastic large cell lymphoma, ALK-positive                    |   | 0 | 0 | 0 | 0 | 0 | 0 | 0 | 0 | 0 | 0 | 0 | 0 | 0 | 2 | 0 | 0 | 0 |
| 1056 |                                                                 | 0 |   |   |   |   |   |   |   |   |   |   |   |   |   |   |   |   |   |
| 36   | Angioimmunoblastic T-cell lymphoma                              |   | 0 | 0 | 0 | 0 | 0 | 0 | 0 | 0 | 0 | 0 | 0 | 0 | 0 | 2 | 0 | 0 | 0 |
| 1057 |                                                                 | 0 |   |   |   |   |   |   |   |   |   |   |   |   |   |   |   |   |   |
| 09   | Enteropathy-associated T-cell lymphoma                          |   | 0 | 0 | 0 | 0 | 0 | 0 | 0 | 0 | 0 | 0 | 0 | 0 | 0 | 2 | 0 | 0 | 0 |
| 1057 |                                                                 | 0 |   |   |   |   |   |   |   |   |   |   |   |   |   |   |   |   |   |
| 62   | UNIFOCA L LANGERHANS-CELL HISTIOCYTOSIS                         |   | 0 | 0 | 0 | 0 | 0 | 0 | 0 | 0 | 0 | 0 | 0 | 0 | 0 | 2 | 0 | 0 | 0 |
| 1058 |                                                                 | 0 |   |   |   |   |   |   |   |   |   |   |   |   |   |   |   |   |   |
| 41   | Nodular sclerosis classical Hodgkin lymphoma                    |   | 0 | 0 | 0 | 0 | 0 | 0 | 0 | 0 | 0 | 0 | 0 | 0 | 0 | 2 | 0 | 0 | 0 |
| 1058 |                                                                 | 0 |   |   |   |   |   |   |   |   |   |   |   |   |   |   |   |   |   |
| 89   | Follicular lymphoma grade 1                                     |   | 0 | 0 | 0 | 0 | 0 | 0 | 0 | 0 | 0 | 0 | 0 | 0 | 0 | 2 | 0 | 0 | 0 |
| 1059 |                                                                 | 0 |   |   |   |   |   |   |   |   |   |   |   |   |   |   |   |   |   |
| 25   | Subcutaneous panniculitic T-cell lymphoma                       |   | 0 | 0 | 0 | 0 | 0 | 0 | 0 | 0 | 0 | 0 | 0 | 0 | 0 | 2 | 0 | 0 | 0 |
| 1059 |                                                                 | 0 |   |   |   |   |   |   |   |   |   |   |   |   |   |   |   |   |   |
| 55   | Anaplastic large cell lymphoma, ALK-negative                    |   | 0 | 0 | 0 | 0 | 0 | 0 | 0 | 0 | 0 | 0 | 0 | 0 | 0 | 2 | 0 | 0 | 0 |
| 1059 |                                                                 | 0 |   |   |   |   |   |   |   |   |   |   |   |   |   |   |   |   |   |
| 66   | EXTRANOD MARG ZONE B-CELL LYMPHOM<br>MUCOSA-ASSOC LYMPHOID TISS |   | 0 | 0 | 0 | 0 | 0 | 0 | 0 | 0 | 0 | 0 | 0 | 0 | 0 | 2 | 0 | 0 | 0 |
| 1060 |                                                                 | 0 |   |   |   |   |   |   |   |   |   |   |   |   |   |   |   |   |   |
| 63   | Other types of follicular lymphoma                              |   | 0 | 0 | 0 | 0 | 0 | 0 | 0 | 0 | 0 | 0 | 0 | 0 | 0 | 2 | 0 | 0 | 0 |
| 1061 |                                                                 | 0 |   |   |   |   |   |   |   |   |   |   |   |   |   |   |   |   |   |
| 37   | [M]RETICULOSARCOMAS                                             |   | 0 | 0 | 0 | 0 | 0 | 0 | 0 | 0 | 0 | 0 | 0 | 0 | 0 | 2 | 0 | 0 | 0 |
| 1063 |                                                                 | 0 |   |   |   |   |   |   |   |   |   |   |   |   |   |   |   |   |   |
| 49   | Hodgkin lymphoma NOS                                            |   | 0 | 0 | 0 | 0 | 0 | 0 | 0 | 0 | 0 | 0 | 0 | 0 | 0 | 2 | 0 | 0 | 0 |
| 1065 |                                                                 | 0 |   |   |   |   |   |   |   |   |   |   |   |   |   |   |   |   |   |
| 97   | Lymphocyte-rich classical Hodgkin lymphoma                      |   | 0 | 0 | 0 | 0 | 0 | 0 | 0 | 0 | 0 | 0 | 0 | 0 | 0 | 2 | 0 | 0 | 0 |
| 1068 |                                                                 | 0 |   |   |   |   |   |   |   |   |   |   |   |   |   |   |   |   |   |
| 67   | Non-follicular lymphoma                                         |   | 0 | 0 | 0 | 0 | 0 | 0 | 0 | 0 | 0 | 0 | 0 | 0 | 0 | 2 | 0 | 0 | 0 |



































































|       |                                                             |   |   |   |   |   |   |   |   |   |   |   |   |   |   |   |   |   |   |
|-------|-------------------------------------------------------------|---|---|---|---|---|---|---|---|---|---|---|---|---|---|---|---|---|---|
| I12.0 | Hypertensive renal disease with renal failure               | 0 | 0 | 0 | 0 | 0 | 0 | 0 | 0 | 0 | 0 | 2 | 0 | 0 | 0 | 0 | 0 | 0 | 0 |
| I13.1 | Hypertensive heart and renal disease with renal failure     | 0 | 0 | 0 | 0 | 0 | 0 | 0 | 0 | 0 | 0 | 2 | 0 | 0 | 0 | 0 | 0 | 0 | 0 |
| I77.0 | arteriovenous fistula, acquired                             | 0 | 0 | 0 | 0 | 0 | 0 | 0 | 0 | 0 | 0 | 2 | 0 | 0 | 0 | 0 | 0 | 0 | 0 |
| N16.5 | renal tubulo-interstitial disorders in transplant rejection | 0 | 0 | 0 | 0 | 0 | 0 | 0 | 0 | 0 | 0 | 2 | 0 | 0 | 0 | 0 | 0 | 0 | 0 |
| N18.0 | End-stage renal disease                                     | 0 | 0 | 0 | 0 | 0 | 0 | 0 | 0 | 0 | 0 | 2 | 0 | 0 | 0 | 0 | 0 | 0 | 0 |
| N18.3 | Chronic kidney disease, stage 3                             | 0 | 0 | 0 | 0 | 0 | 0 | 0 | 0 | 0 | 0 | 2 | 0 | 0 | 0 | 0 | 0 | 0 | 0 |
| N18.4 | Chronic kidney disease, stage 4                             | 0 | 0 | 0 | 0 | 0 | 0 | 0 | 0 | 0 | 0 | 2 | 0 | 0 | 0 | 0 | 0 | 0 | 0 |
| N18.5 | Chronic kidney disease, stage 5                             | 0 | 0 | 0 | 0 | 0 | 0 | 0 | 0 | 0 | 0 | 2 | 0 | 0 | 0 | 0 | 0 | 0 | 0 |
| N18.8 | Other chronic renal failure                                 | 0 | 0 | 0 | 0 | 0 | 0 | 0 | 0 | 0 | 0 | 2 | 0 | 0 | 0 | 0 | 0 | 0 | 0 |
| N18.9 | Chronic renal failure, unspecified                          | 0 | 0 | 0 | 0 | 0 | 0 | 0 | 0 | 0 | 0 | 2 | 0 | 0 | 0 | 0 | 0 | 0 | 0 |
| N19   | Unspecified kidney failure                                  | 0 | 0 | 0 | 0 | 0 | 0 | 0 | 0 | 0 | 0 | 2 | 0 | 0 | 0 | 0 | 0 | 0 | 0 |
| T82.4 | mechanical complication of vascular dialysis catheter       | 0 | 0 | 0 | 0 | 0 | 0 | 0 | 0 | 0 | 0 | 2 | 0 | 0 | 0 | 0 | 0 | 0 | 0 |
| T86.1 | kidney transplant failure and rejection                     | 0 | 0 | 0 | 0 | 0 | 0 | 0 | 0 | 0 | 0 | 2 | 0 | 0 | 0 | 0 | 0 | 0 | 0 |
| Y60.2 | during kidney dialysis or other perfusion                   | 0 | 0 | 0 | 0 | 0 | 0 | 0 | 0 | 0 | 0 | 2 | 0 | 0 | 0 | 0 | 0 | 0 | 0 |
| Y61.2 | during kidney dialysis or other perfusion                   | 0 | 0 | 0 | 0 | 0 | 0 | 0 | 0 | 0 | 0 | 2 | 0 | 0 | 0 | 0 | 0 | 0 | 0 |
| Y62.2 | during kidney dialysis or other perfusion                   | 0 | 0 | 0 | 0 | 0 | 0 | 0 | 0 | 0 | 0 | 2 | 0 | 0 | 0 | 0 | 0 | 0 | 0 |
| Y84.1 | kidney dialysis                                             | 0 | 0 | 0 | 0 | 0 | 0 | 0 | 0 | 0 | 0 | 2 | 0 | 0 | 0 | 0 | 0 | 0 | 0 |
| Z49   | care involving dialysis                                     | 0 | 0 | 0 | 0 | 0 | 0 | 0 | 0 | 0 | 0 | 2 | 0 | 0 | 0 | 0 | 0 | 0 | 0 |
| Z49.0 | preparatory care for dialysis                               | 0 | 0 | 0 | 0 | 0 | 0 | 0 | 0 | 0 | 0 | 2 | 0 | 0 | 0 | 0 | 0 | 0 | 0 |
| Z49.1 | extracorporeal dialysis                                     | 0 | 0 | 0 | 0 | 0 | 0 | 0 | 0 | 0 | 0 | 2 | 0 | 0 | 0 | 0 | 0 | 0 | 0 |
| Z49.2 | other dialysis                                              | 0 | 0 | 0 | 0 | 0 | 0 | 0 | 0 | 0 | 0 | 2 | 0 | 0 | 0 | 0 | 0 | 0 | 0 |
| Z94.0 | kidney transplant status                                    | 0 | 0 | 0 | 0 | 0 | 0 | 0 | 0 | 0 | 0 | 2 | 0 | 0 | 0 | 0 | 0 | 0 | 0 |
| Z99.2 | dependence on renal dialysis                                | 0 | 0 | 0 | 0 | 0 | 0 | 0 | 0 | 0 | 0 | 2 | 0 | 0 | 0 | 0 | 0 | 0 | 0 |
| I13.2 | Hyper heart and renal dis both (cong) heart and renal fail  | 0 | 0 | 0 | 0 | 0 | 0 | 0 | 0 | 0 | 0 | 2 | 0 | 0 | 0 | 0 | 0 | 0 | 0 |

|           |                                                              |   |   |   |   |   |   |   |   |   |   |   |   |   |   |   |   |   |   |   |
|-----------|--------------------------------------------------------------|---|---|---|---|---|---|---|---|---|---|---|---|---|---|---|---|---|---|---|
| M1<br>4.2 | Diabetic arthropathy                                         | 0 | 0 | 0 | 0 | 0 | 0 | 0 | 0 | 0 | 0 | 0 | 0 | 2 | 0 | 0 | 0 | 0 | 0 | 0 |
| H28<br>.0 | Diabetic cataract                                            | 0 | 0 | 0 | 0 | 0 | 0 | 0 | 0 | 0 | 0 | 0 | 0 | 2 | 0 | 0 | 0 | 0 | 0 | 0 |
| G59<br>.0 | Diabetic mononeuropathy                                      | 0 | 0 | 0 | 0 | 0 | 0 | 0 | 0 | 0 | 0 | 0 | 0 | 2 | 0 | 0 | 0 | 0 | 0 | 0 |
| G63<br>.2 | Diabetic polyneuropathy                                      | 0 | 0 | 0 | 0 | 0 | 0 | 0 | 0 | 0 | 0 | 0 | 0 | 2 | 0 | 0 | 0 | 0 | 0 | 0 |
| H36<br>.0 | Diabetic retinopathy                                         | 0 | 0 | 0 | 0 | 0 | 0 | 0 | 0 | 0 | 0 | 0 | 0 | 2 | 0 | 0 | 0 | 0 | 0 | 0 |
| N08<br>.3 | Glomerular disorders in diabetes mellitus                    | 0 | 0 | 0 | 0 | 0 | 0 | 0 | 0 | 0 | 0 | 0 | 0 | 2 | 0 | 0 | 0 | 0 | 0 | 0 |
| E10<br>.7 | Insulin-dependent diabetes mellitus with multiple comps      | 0 | 0 | 0 | 0 | 0 | 0 | 0 | 0 | 0 | 0 | 0 | 0 | 2 | 0 | 0 | 0 | 0 | 0 | 0 |
| E10<br>.4 | Insulin-dependent diabetes mellitus with neurological comps  | 0 | 0 | 0 | 0 | 0 | 0 | 0 | 0 | 0 | 0 | 0 | 0 | 2 | 0 | 0 | 0 | 0 | 0 | 0 |
| E10<br>.3 | Insulin-dependent diabetes mellitus with ophthalmic comps    | 0 | 0 | 0 | 0 | 0 | 0 | 0 | 0 | 0 | 0 | 0 | 0 | 2 | 0 | 0 | 0 | 0 | 0 | 0 |
| E10<br>.6 | Insulin-dependent diabetes mellitus with other spec comps    | 0 | 0 | 0 | 0 | 0 | 0 | 0 | 0 | 0 | 0 | 0 | 0 | 2 | 0 | 0 | 0 | 0 | 0 | 0 |
| E10<br>.5 | Insulin-dependent diabetes mellitus with periph circ comps   | 0 | 0 | 0 | 0 | 0 | 0 | 0 | 0 | 0 | 0 | 0 | 0 | 2 | 0 | 0 | 0 | 0 | 0 | 0 |
| E10<br>.2 | Insulin-dependent diabetes mellitus with renal complications | 0 | 0 | 0 | 0 | 0 | 0 | 0 | 0 | 0 | 0 | 0 | 0 | 2 | 0 | 0 | 0 | 0 | 0 | 0 |
| E10<br>.8 | Insulin-dependent diabetes mellitus with unspec comps        | 0 | 0 | 0 | 0 | 0 | 0 | 0 | 0 | 0 | 0 | 0 | 0 | 2 | 0 | 0 | 0 | 0 | 0 | 0 |
| E11<br>.6 | Non-insulin-depend diabetes mellitus with other spec comp    | 0 | 0 | 0 | 0 | 0 | 0 | 0 | 0 | 0 | 0 | 0 | 0 | 2 | 0 | 0 | 0 | 0 | 0 | 0 |
| E11<br>.5 | Non-insulin-depend diabetes mellitus with periph circ comp   | 0 | 0 | 0 | 0 | 0 | 0 | 0 | 0 | 0 | 0 | 0 | 0 | 2 | 0 | 0 | 0 | 0 | 0 | 0 |
| E11<br>.7 | Non-insulin-dependent diabetes mellitus with multiple comps  | 0 | 0 | 0 | 0 | 0 | 0 | 0 | 0 | 0 | 0 | 0 | 0 | 2 | 0 | 0 | 0 | 0 | 0 | 0 |
| E11<br>.4 | Non-insulin-dependent diabetes mellitus with neuro comps     | 0 | 0 | 0 | 0 | 0 | 0 | 0 | 0 | 0 | 0 | 0 | 0 | 2 | 0 | 0 | 0 | 0 | 0 | 0 |
| E11<br>.3 | Non-insulin-dependent diabetes mellitus with ophthalm comps  | 0 | 0 | 0 | 0 | 0 | 0 | 0 | 0 | 0 | 0 | 0 | 0 | 2 | 0 | 0 | 0 | 0 | 0 | 0 |
| E11<br>.2 | Non-insulin-dependent diabetes mellitus with renal comps     | 0 | 0 | 0 | 0 | 0 | 0 | 0 | 0 | 0 | 0 | 0 | 0 | 2 | 0 | 0 | 0 | 0 | 0 | 0 |
| E11<br>.8 | Non-insulin-dependent diabetes mellitus with unspec comps    | 0 | 0 | 0 | 0 | 0 | 0 | 0 | 0 | 0 | 0 | 0 | 0 | 2 | 0 | 0 | 0 | 0 | 0 | 0 |
| E14<br>.7 | Unspecified diabetes mellitus with multiple complications    | 0 | 0 | 0 | 0 | 0 | 0 | 0 | 0 | 0 | 0 | 0 | 0 | 2 | 0 | 0 | 0 | 0 | 0 | 0 |
| E14<br>.4 | Unspecified diabetes mellitus with neurological comps        | 0 | 0 | 0 | 0 | 0 | 0 | 0 | 0 | 0 | 0 | 0 | 0 | 2 | 0 | 0 | 0 | 0 | 0 | 0 |
| E14<br>.3 | Unspecified diabetes mellitus with ophthalmic complications  | 0 | 0 | 0 | 0 | 0 | 0 | 0 | 0 | 0 | 0 | 0 | 0 | 2 | 0 | 0 | 0 | 0 | 0 | 0 |
| E14<br>.6 | Unspecified diabetes mellitus with other specified comps     | 0 | 0 | 0 | 0 | 0 | 0 | 0 | 0 | 0 | 0 | 0 | 0 | 2 | 0 | 0 | 0 | 0 | 0 | 0 |

|     |                                                              |   |   |   |   |   |   |   |   |   |   |   |   |   |   |   |   |   |   |
|-----|--------------------------------------------------------------|---|---|---|---|---|---|---|---|---|---|---|---|---|---|---|---|---|---|
| E14 | Unspecified diabetes mellitus with periph circulatory comps  | 0 | 0 | 0 | 0 | 0 | 0 | 0 | 0 | 0 | 0 | 0 | 2 | 0 | 0 | 0 | 0 | 0 | 0 |
| E14 | Unspecified diabetes mellitus with renal complications       | 0 | 0 | 0 | 0 | 0 | 0 | 0 | 0 | 0 | 0 | 0 | 2 | 0 | 0 | 0 | 0 | 0 | 0 |
| E14 | Unspecified diabetes mellitus with unspecified complications | 0 | 0 | 0 | 0 | 0 | 0 | 0 | 0 | 0 | 0 | 0 | 2 | 0 | 0 | 0 | 0 | 0 | 0 |
| C00 | Malignant neoplasm of lip                                    | 0 | 0 | 0 | 0 | 0 | 0 | 0 | 0 | 0 | 0 | 0 | 0 | 2 | 0 | 0 | 0 | 0 | 0 |
| C00 | .0 Malignant neoplasm of external upper lip                  | 0 | 0 | 0 | 0 | 0 | 0 | 0 | 0 | 0 | 0 | 0 | 0 | 2 | 0 | 0 | 0 | 0 | 0 |
| C00 | .1 Malignant neoplasm of external lower lip                  | 0 | 0 | 0 | 0 | 0 | 0 | 0 | 0 | 0 | 0 | 0 | 0 | 2 | 0 | 0 | 0 | 0 | 0 |
| C00 | .2 Malignant neoplasm of external lip, unspecified           | 0 | 0 | 0 | 0 | 0 | 0 | 0 | 0 | 0 | 0 | 0 | 0 | 2 | 0 | 0 | 0 | 0 | 0 |
| C00 | .3 Malignant neoplasm of upper lip, inner aspect             | 0 | 0 | 0 | 0 | 0 | 0 | 0 | 0 | 0 | 0 | 0 | 0 | 2 | 0 | 0 | 0 | 0 | 0 |
| C00 | .4 Malignant neoplasm of lower lip, inner aspect             | 0 | 0 | 0 | 0 | 0 | 0 | 0 | 0 | 0 | 0 | 0 | 0 | 2 | 0 | 0 | 0 | 0 | 0 |
| C00 | .5 Malignant neoplasm of lip, unspecified, inner aspect      | 0 | 0 | 0 | 0 | 0 | 0 | 0 | 0 | 0 | 0 | 0 | 0 | 2 | 0 | 0 | 0 | 0 | 0 |
| C00 | .6 Malignant neoplasm of commissure of lip                   | 0 | 0 | 0 | 0 | 0 | 0 | 0 | 0 | 0 | 0 | 0 | 0 | 2 | 0 | 0 | 0 | 0 | 0 |
| C00 | .8 Malignant neoplasm of overlapping lesion of lip           | 0 | 0 | 0 | 0 | 0 | 0 | 0 | 0 | 0 | 0 | 0 | 0 | 2 | 0 | 0 | 0 | 0 | 0 |
| C00 | .9 Malignant neoplasm of lip, unspecified                    | 0 | 0 | 0 | 0 | 0 | 0 | 0 | 0 | 0 | 0 | 0 | 0 | 2 | 0 | 0 | 0 | 0 | 0 |
| C01 | Malignant neoplasm of base of tongue                         | 0 | 0 | 0 | 0 | 0 | 0 | 0 | 0 | 0 | 0 | 0 | 0 | 2 | 0 | 0 | 0 | 0 | 0 |
| C02 | Malignant neoplasm of other and unspecified parts of tongue  | 0 | 0 | 0 | 0 | 0 | 0 | 0 | 0 | 0 | 0 | 0 | 0 | 2 | 0 | 0 | 0 | 0 | 0 |
| C02 | .0 Malignant neoplasm of dorsal surface tongue               | 0 | 0 | 0 | 0 | 0 | 0 | 0 | 0 | 0 | 0 | 0 | 0 | 2 | 0 | 0 | 0 | 0 | 0 |
| C02 | .1 Malignant neoplasm of border of tongue                    | 0 | 0 | 0 | 0 | 0 | 0 | 0 | 0 | 0 | 0 | 0 | 0 | 2 | 0 | 0 | 0 | 0 | 0 |
| C02 | .2 Malignant neoplasm of ventral surface of tongue           | 0 | 0 | 0 | 0 | 0 | 0 | 0 | 0 | 0 | 0 | 0 | 0 | 2 | 0 | 0 | 0 | 0 | 0 |
| C02 | .3 Malignant neo of anterior two-thirds of tongue, part uns  | 0 | 0 | 0 | 0 | 0 | 0 | 0 | 0 | 0 | 0 | 0 | 0 | 2 | 0 | 0 | 0 | 0 | 0 |
| C02 | .4 Malignant neoplasm of lingual tonsil                      | 0 | 0 | 0 | 0 | 0 | 0 | 0 | 0 | 0 | 0 | 0 | 0 | 2 | 0 | 0 | 0 | 0 | 0 |
| C02 | .8 Malignant neoplasm of overlapping lesion of tongue        | 0 | 0 | 0 | 0 | 0 | 0 | 0 | 0 | 0 | 0 | 0 | 0 | 2 | 0 | 0 | 0 | 0 | 0 |
| C02 | .9 Malignant neoplasm of tongue, unspecified                 | 0 | 0 | 0 | 0 | 0 | 0 | 0 | 0 | 0 | 0 | 0 | 0 | 2 | 0 | 0 | 0 | 0 | 0 |
| C03 | Malignant neoplasm of gum                                    | 0 | 0 | 0 | 0 | 0 | 0 | 0 | 0 | 0 | 0 | 0 | 0 | 2 | 0 | 0 | 0 | 0 | 0 |
| C03 | .0 Malignant neoplasm of upper gum                           | 0 | 0 | 0 | 0 | 0 | 0 | 0 | 0 | 0 | 0 | 0 | 0 | 2 | 0 | 0 | 0 | 0 | 0 |



|     |    |                                                                               |   |   |   |   |   |   |   |   |   |   |   |   |   |   |   |   |   |   |
|-----|----|-------------------------------------------------------------------------------|---|---|---|---|---|---|---|---|---|---|---|---|---|---|---|---|---|---|
| C03 | .1 | Malignant neoplasm of lower gum                                               | 0 | 0 | 0 | 0 | 0 | 0 | 0 | 0 | 0 | 0 | 0 | 0 | 2 | 0 | 0 | 0 | 0 | 0 |
| C03 | .9 | Malignant neoplasm of gum unspecified                                         | 0 | 0 | 0 | 0 | 0 | 0 | 0 | 0 | 0 | 0 | 0 | 0 | 2 | 0 | 0 | 0 | 0 | 0 |
| C04 |    | Malignant neoplasm of floor of mouth                                          | 0 | 0 | 0 | 0 | 0 | 0 | 0 | 0 | 0 | 0 | 0 | 0 | 2 | 0 | 0 | 0 | 0 | 0 |
| C04 | .0 | Malignant neoplasm of floor of anterior floor of mouth                        | 0 | 0 | 0 | 0 | 0 | 0 | 0 | 0 | 0 | 0 | 0 | 0 | 2 | 0 | 0 | 0 | 0 | 0 |
| C04 | .1 | Malignant neoplasm of lateral floor of mouth                                  | 0 | 0 | 0 | 0 | 0 | 0 | 0 | 0 | 0 | 0 | 0 | 0 | 2 | 0 | 0 | 0 | 0 | 0 |
| C04 | .8 | Malignant neoplasm, overlapping lesion of floor of mouth                      | 0 | 0 | 0 | 0 | 0 | 0 | 0 | 0 | 0 | 0 | 0 | 0 | 2 | 0 | 0 | 0 | 0 | 0 |
| C04 | .9 | Malignant neoplasm of floor of mouth, floor of mouth, unspec                  | 0 | 0 | 0 | 0 | 0 | 0 | 0 | 0 | 0 | 0 | 0 | 0 | 2 | 0 | 0 | 0 | 0 | 0 |
| C05 |    | Malignant neoplasm of palate                                                  | 0 | 0 | 0 | 0 | 0 | 0 | 0 | 0 | 0 | 0 | 0 | 0 | 2 | 0 | 0 | 0 | 0 | 0 |
| C05 | .0 | Malignant neoplasm of hard palate                                             | 0 | 0 | 0 | 0 | 0 | 0 | 0 | 0 | 0 | 0 | 0 | 0 | 2 | 0 | 0 | 0 | 0 | 0 |
| C05 | .1 | Malignant neoplasm of soft palate                                             | 0 | 0 | 0 | 0 | 0 | 0 | 0 | 0 | 0 | 0 | 0 | 0 | 2 | 0 | 0 | 0 | 0 | 0 |
| C05 | .2 | Malignant neoplasm of uvula                                                   | 0 | 0 | 0 | 0 | 0 | 0 | 0 | 0 | 0 | 0 | 0 | 0 | 2 | 0 | 0 | 0 | 0 | 0 |
| C05 | .8 | Malignant neoplasm, overlapping lesion of palate                              | 0 | 0 | 0 | 0 | 0 | 0 | 0 | 0 | 0 | 0 | 0 | 0 | 2 | 0 | 0 | 0 | 0 | 0 |
| C05 | .9 | Malignant neoplasm of palate, unspecified                                     | 0 | 0 | 0 | 0 | 0 | 0 | 0 | 0 | 0 | 0 | 0 | 0 | 2 | 0 | 0 | 0 | 0 | 0 |
| C06 |    | Malignant neoplasm of other and unspecified parts of mouth                    | 0 | 0 | 0 | 0 | 0 | 0 | 0 | 0 | 0 | 0 | 0 | 0 | 2 | 0 | 0 | 0 | 0 | 0 |
| C06 | .0 | Malignant neoplasm cheek mucosa                                               | 0 | 0 | 0 | 0 | 0 | 0 | 0 | 0 | 0 | 0 | 0 | 0 | 2 | 0 | 0 | 0 | 0 | 0 |
| C06 | .1 | Malignant neoplasm of vestibule of mouth                                      | 0 | 0 | 0 | 0 | 0 | 0 | 0 | 0 | 0 | 0 | 0 | 0 | 2 | 0 | 0 | 0 | 0 | 0 |
| C06 | .2 | Malignant neoplasm of retromolar area                                         | 0 | 0 | 0 | 0 | 0 | 0 | 0 | 0 | 0 | 0 | 0 | 0 | 2 | 0 | 0 | 0 | 0 | 0 |
| C06 | .8 | Malignant neoplasm, overlapping lesion of other and unspecified part of mouth | 0 | 0 | 0 | 0 | 0 | 0 | 0 | 0 | 0 | 0 | 0 | 0 | 2 | 0 | 0 | 0 | 0 | 0 |
| C06 | .9 | Malignant neoplasm of part of mouth, unspecified                              | 0 | 0 | 0 | 0 | 0 | 0 | 0 | 0 | 0 | 0 | 0 | 0 | 2 | 0 | 0 | 0 | 0 | 0 |
| C07 |    | Malignant neoplasm of parotid gland                                           | 0 | 0 | 0 | 0 | 0 | 0 | 0 | 0 | 0 | 0 | 0 | 0 | 2 | 0 | 0 | 0 | 0 | 0 |
| C08 |    | Malignant neoplasm of other and unspecified major salivary glands             | 0 | 0 | 0 | 0 | 0 | 0 | 0 | 0 | 0 | 0 | 0 | 0 | 2 | 0 | 0 | 0 | 0 | 0 |
| C08 | .0 | Malignant neoplasm of submandibular gland                                     | 0 | 0 | 0 | 0 | 0 | 0 | 0 | 0 | 0 | 0 | 0 | 0 | 2 | 0 | 0 | 0 | 0 | 0 |
| C08 | .1 | Malignant neoplasm of sublingual gland                                        | 0 | 0 | 0 | 0 | 0 | 0 | 0 | 0 | 0 | 0 | 0 | 0 | 2 | 0 | 0 | 0 | 0 | 0 |
| C08 | .8 | Malignant neoplasm, overlapping lesion of major salivary gland                | 0 | 0 | 0 | 0 | 0 | 0 | 0 | 0 | 0 | 0 | 0 | 0 | 2 | 0 | 0 | 0 | 0 | 0 |

|     |                                                          |   |   |   |   |   |   |   |   |   |   |   |   |   |   |   |   |   |   |
|-----|----------------------------------------------------------|---|---|---|---|---|---|---|---|---|---|---|---|---|---|---|---|---|---|
| C08 | Malignant neoplasm of major salivary gland, unspecified  | 0 | 0 | 0 | 0 | 0 | 0 | 0 | 0 | 0 | 0 | 0 | 0 | 2 | 0 | 0 | 0 | 0 | 0 |
| C09 | Malignant neoplasm of tonsil                             | 0 | 0 | 0 | 0 | 0 | 0 | 0 | 0 | 0 | 0 | 0 | 0 | 2 | 0 | 0 | 0 | 0 | 0 |
| C09 | Malignant neoplasm tonsillar fossa                       | 0 | 0 | 0 | 0 | 0 | 0 | 0 | 0 | 0 | 0 | 0 | 0 | 2 | 0 | 0 | 0 | 0 | 0 |
| C09 | Malig neo of tonsillar pillar (anterior)(posterior)      | 0 | 0 | 0 | 0 | 0 | 0 | 0 | 0 | 0 | 0 | 0 | 0 | 2 | 0 | 0 | 0 | 0 | 0 |
| C09 | Malignant neoplasm of overlapping lesion of tonsil       | 0 | 0 | 0 | 0 | 0 | 0 | 0 | 0 | 0 | 0 | 0 | 0 | 2 | 0 | 0 | 0 | 0 | 0 |
| C09 | Malignant neoplasm of tonsil unspecified                 | 0 | 0 | 0 | 0 | 0 | 0 | 0 | 0 | 0 | 0 | 0 | 0 | 2 | 0 | 0 | 0 | 0 | 0 |
| C10 | Malignant neoplasm of oropharynx                         | 0 | 0 | 0 | 0 | 0 | 0 | 0 | 0 | 0 | 0 | 0 | 0 | 2 | 0 | 0 | 0 | 0 | 0 |
| C10 | Malignant neoplasm of vallecula                          | 0 | 0 | 0 | 0 | 0 | 0 | 0 | 0 | 0 | 0 | 0 | 0 | 2 | 0 | 0 | 0 | 0 | 0 |
| C10 | Malignant neoplasm of anterior surface of epiglottis     | 0 | 0 | 0 | 0 | 0 | 0 | 0 | 0 | 0 | 0 | 0 | 0 | 2 | 0 | 0 | 0 | 0 | 0 |
| C10 | Malignant neoplasm of lateral wall of oropharynx         | 0 | 0 | 0 | 0 | 0 | 0 | 0 | 0 | 0 | 0 | 0 | 0 | 2 | 0 | 0 | 0 | 0 | 0 |
| C10 | Malignant neoplasm of posterior wall of oropharynx       | 0 | 0 | 0 | 0 | 0 | 0 | 0 | 0 | 0 | 0 | 0 | 0 | 2 | 0 | 0 | 0 | 0 | 0 |
| C10 | Malignant neoplasm of branchial cleft                    | 0 | 0 | 0 | 0 | 0 | 0 | 0 | 0 | 0 | 0 | 0 | 0 | 2 | 0 | 0 | 0 | 0 | 0 |
| C10 | Malignant neoplasm overlapping lesion of oropharynx      | 0 | 0 | 0 | 0 | 0 | 0 | 0 | 0 | 0 | 0 | 0 | 0 | 2 | 0 | 0 | 0 | 0 | 0 |
| C10 | Malignant neoplasm of oropharynx unspecified             | 0 | 0 | 0 | 0 | 0 | 0 | 0 | 0 | 0 | 0 | 0 | 0 | 2 | 0 | 0 | 0 | 0 | 0 |
| C11 | Malignant neoplasm of nasopharynx                        | 0 | 0 | 0 | 0 | 0 | 0 | 0 | 0 | 0 | 0 | 0 | 0 | 2 | 0 | 0 | 0 | 0 | 0 |
| C11 | Malignant neoplasm of superior wall of nasopharynx       | 0 | 0 | 0 | 0 | 0 | 0 | 0 | 0 | 0 | 0 | 0 | 0 | 2 | 0 | 0 | 0 | 0 | 0 |
| C11 | Malignant neoplasm of posterior wall of nasopharynx      | 0 | 0 | 0 | 0 | 0 | 0 | 0 | 0 | 0 | 0 | 0 | 0 | 2 | 0 | 0 | 0 | 0 | 0 |
| C11 | Malignant neoplasm of lateral wall of nasopharynx        | 0 | 0 | 0 | 0 | 0 | 0 | 0 | 0 | 0 | 0 | 0 | 0 | 2 | 0 | 0 | 0 | 0 | 0 |
| C11 | Malignant neoplasm of anterior wall of nasopharynx       | 0 | 0 | 0 | 0 | 0 | 0 | 0 | 0 | 0 | 0 | 0 | 0 | 2 | 0 | 0 | 0 | 0 | 0 |
| C11 | Malignant neoplasm overlapping lesion of nasopharynx     | 0 | 0 | 0 | 0 | 0 | 0 | 0 | 0 | 0 | 0 | 0 | 0 | 2 | 0 | 0 | 0 | 0 | 0 |
| C11 | Malignant neoplasm of nasopharynx unspecified            | 0 | 0 | 0 | 0 | 0 | 0 | 0 | 0 | 0 | 0 | 0 | 0 | 2 | 0 | 0 | 0 | 0 | 0 |
| C12 | Malignant neoplasm of pyriform sinus                     | 0 | 0 | 0 | 0 | 0 | 0 | 0 | 0 | 0 | 0 | 0 | 0 | 2 | 0 | 0 | 0 | 0 | 0 |
| C13 | Malignant neoplasm of hypopharynx                        | 0 | 0 | 0 | 0 | 0 | 0 | 0 | 0 | 0 | 0 | 0 | 0 | 2 | 0 | 0 | 0 | 0 | 0 |
| C13 | Malignant neoplasm of hypopharynx, postcricoid region    | 0 | 0 | 0 | 0 | 0 | 0 | 0 | 0 | 0 | 0 | 0 | 0 | 2 | 0 | 0 | 0 | 0 | 0 |
| C13 | Malig neoplasm aryepiglottic fold, hypopharyngeal aspect | 0 | 0 | 0 | 0 | 0 | 0 | 0 | 0 | 0 | 0 | 0 | 0 | 2 | 0 | 0 | 0 | 0 | 0 |

|       |                                                             |   |   |   |   |   |   |   |   |   |   |   |   |   |   |   |   |   |   |
|-------|-------------------------------------------------------------|---|---|---|---|---|---|---|---|---|---|---|---|---|---|---|---|---|---|
| C13.2 | Malignant neoplasm posterior wall of hypopharynx            | 0 | 0 | 0 | 0 | 0 | 0 | 0 | 0 | 0 | 0 | 0 | 0 | 2 | 0 | 0 | 0 | 0 | 0 |
| C13.8 | Malignant neoplasm overlapping lesion of hypopharynx        | 0 | 0 | 0 | 0 | 0 | 0 | 0 | 0 | 0 | 0 | 0 | 0 | 2 | 0 | 0 | 0 | 0 | 0 |
| C13.9 | Malignant neoplasm of hypopharynx unspecified               | 0 | 0 | 0 | 0 | 0 | 0 | 0 | 0 | 0 | 0 | 0 | 0 | 2 | 0 | 0 | 0 | 0 | 0 |
| C14   | Mal neo oth ill-def sites lip/oral cavity/pharynx           | 0 | 0 | 0 | 0 | 0 | 0 | 0 | 0 | 0 | 0 | 0 | 0 | 2 | 0 | 0 | 0 | 0 | 0 |
| C14.0 | Malignant neoplasm of pharynx, unsp                         | 0 | 0 | 0 | 0 | 0 | 0 | 0 | 0 | 0 | 0 | 0 | 0 | 2 | 0 | 0 | 0 | 0 | 0 |
| C14.2 | Malignant neoplasm of Waldeyer's ring                       | 0 | 0 | 0 | 0 | 0 | 0 | 0 | 0 | 0 | 0 | 0 | 0 | 2 | 0 | 0 | 0 | 0 | 0 |
| C14.8 | Malig neo, overlapping lesion of lip, oral cavity & pharynx | 0 | 0 | 0 | 0 | 0 | 0 | 0 | 0 | 0 | 0 | 0 | 0 | 2 | 0 | 0 | 0 | 0 | 0 |
| C15   | Malignant neoplasm of oesophagus                            | 0 | 0 | 0 | 0 | 0 | 0 | 0 | 0 | 0 | 0 | 0 | 0 | 2 | 0 | 0 | 0 | 0 | 0 |
| C15.0 | Malignant neoplasm of cervical part of oesophagus           | 0 | 0 | 0 | 0 | 0 | 0 | 0 | 0 | 0 | 0 | 0 | 0 | 2 | 0 | 0 | 0 | 0 | 0 |
| C15.1 | Malignant neoplasm of thoracic part of oesophagus           | 0 | 0 | 0 | 0 | 0 | 0 | 0 | 0 | 0 | 0 | 0 | 0 | 2 | 0 | 0 | 0 | 0 | 0 |
| C15.2 | Malignant neo of abdominal part of oesophagus               | 0 | 0 | 0 | 0 | 0 | 0 | 0 | 0 | 0 | 0 | 0 | 0 | 2 | 0 | 0 | 0 | 0 | 0 |
| C15.3 | Malignant neoplasm of upper third of oesophagus             | 0 | 0 | 0 | 0 | 0 | 0 | 0 | 0 | 0 | 0 | 0 | 0 | 2 | 0 | 0 | 0 | 0 | 0 |
| C15.4 | Malignant neoplasm of middle third of oesophagus            | 0 | 0 | 0 | 0 | 0 | 0 | 0 | 0 | 0 | 0 | 0 | 0 | 2 | 0 | 0 | 0 | 0 | 0 |
| C15.5 | Malignant neoplasm of lower third of oesophagus             | 0 | 0 | 0 | 0 | 0 | 0 | 0 | 0 | 0 | 0 | 0 | 0 | 2 | 0 | 0 | 0 | 0 | 0 |
| C15.8 | Malignant neoplasm overlapping lesion of oesophagus         | 0 | 0 | 0 | 0 | 0 | 0 | 0 | 0 | 0 | 0 | 0 | 0 | 2 | 0 | 0 | 0 | 0 | 0 |
| C15.9 | Malignant neoplasm of oesophagus unspecified                | 0 | 0 | 0 | 0 | 0 | 0 | 0 | 0 | 0 | 0 | 0 | 0 | 2 | 0 | 0 | 0 | 0 | 0 |
| C16   | Malignant neoplasm of stomach                               | 0 | 0 | 0 | 0 | 0 | 0 | 0 | 0 | 0 | 0 | 0 | 0 | 2 | 0 | 0 | 0 | 0 | 0 |
| C16.0 | Malignant neoplasm of cardia of stomach                     | 0 | 0 | 0 | 0 | 0 | 0 | 0 | 0 | 0 | 0 | 0 | 0 | 2 | 0 | 0 | 0 | 0 | 0 |
| C16.1 | Malignant neoplasm of fundus of stomach                     | 0 | 0 | 0 | 0 | 0 | 0 | 0 | 0 | 0 | 0 | 0 | 0 | 2 | 0 | 0 | 0 | 0 | 0 |
| C16.2 | Malignant neoplasm of body of stomach                       | 0 | 0 | 0 | 0 | 0 | 0 | 0 | 0 | 0 | 0 | 0 | 0 | 2 | 0 | 0 | 0 | 0 | 0 |
| C16.3 | Malignant neoplasm of pyloric antrum                        | 0 | 0 | 0 | 0 | 0 | 0 | 0 | 0 | 0 | 0 | 0 | 0 | 2 | 0 | 0 | 0 | 0 | 0 |
| C16.4 | Malignant neoplasm of pylorus                               | 0 | 0 | 0 | 0 | 0 | 0 | 0 | 0 | 0 | 0 | 0 | 0 | 2 | 0 | 0 | 0 | 0 | 0 |
| C16.5 | Malignant neoplasm of lesser curvature of stomach, unsp     | 0 | 0 | 0 | 0 | 0 | 0 | 0 | 0 | 0 | 0 | 0 | 0 | 2 | 0 | 0 | 0 | 0 | 0 |
| C16.6 | Malignant neoplasm of greater curvature of stomach, unsp    | 0 | 0 | 0 | 0 | 0 | 0 | 0 | 0 | 0 | 0 | 0 | 0 | 2 | 0 | 0 | 0 | 0 | 0 |

|     |                                                              |   |   |   |   |   |   |   |   |   |   |   |   |   |   |   |   |   |   |
|-----|--------------------------------------------------------------|---|---|---|---|---|---|---|---|---|---|---|---|---|---|---|---|---|---|
| C16 | Malignant neoplasm overlapping lesion of stomach             | 0 | 0 | 0 | 0 | 0 | 0 | 0 | 0 | 0 | 0 | 0 | 0 | 2 | 0 | 0 | 0 | 0 | 0 |
| C16 | Malignant neoplasm of stomach, unspecified                   | 0 | 0 | 0 | 0 | 0 | 0 | 0 | 0 | 0 | 0 | 0 | 0 | 2 | 0 | 0 | 0 | 0 | 0 |
| C17 | Malignant neoplasm of small intestine                        | 0 | 0 | 0 | 0 | 0 | 0 | 0 | 0 | 0 | 0 | 0 | 0 | 2 | 0 | 0 | 0 | 0 | 0 |
| C17 | Malignant neoplasm of small intestine, duodenum              | 0 | 0 | 0 | 0 | 0 | 0 | 0 | 0 | 0 | 0 | 0 | 0 | 2 | 0 | 0 | 0 | 0 | 0 |
| C17 | Malignant neoplasm of small intestine, jejunum               | 0 | 0 | 0 | 0 | 0 | 0 | 0 | 0 | 0 | 0 | 0 | 0 | 2 | 0 | 0 | 0 | 0 | 0 |
| C17 | Malignant neoplasm of small intestine, ileum                 | 0 | 0 | 0 | 0 | 0 | 0 | 0 | 0 | 0 | 0 | 0 | 0 | 2 | 0 | 0 | 0 | 0 | 0 |
| C17 | Malignant neoplasm of small intestine, Meckel's diverticulum | 0 | 0 | 0 | 0 | 0 | 0 | 0 | 0 | 0 | 0 | 0 | 0 | 2 | 0 | 0 | 0 | 0 | 0 |
| C17 | Malignant neoplasm overlapping lesion of small intestine     | 0 | 0 | 0 | 0 | 0 | 0 | 0 | 0 | 0 | 0 | 0 | 0 | 2 | 0 | 0 | 0 | 0 | 0 |
| C17 | Malignant neoplasm of small intestine, unspecified           | 0 | 0 | 0 | 0 | 0 | 0 | 0 | 0 | 0 | 0 | 0 | 0 | 2 | 0 | 0 | 0 | 0 | 0 |
| C18 | Malignant neoplasm of colon                                  | 0 | 0 | 0 | 0 | 0 | 0 | 0 | 0 | 0 | 0 | 0 | 0 | 2 | 0 | 0 | 0 | 0 | 0 |
| C18 | Malignant neoplasm of caecum                                 | 0 | 0 | 0 | 0 | 0 | 0 | 0 | 0 | 0 | 0 | 0 | 0 | 2 | 0 | 0 | 0 | 0 | 0 |
| C18 | Malignant neoplasm of appendix                               | 0 | 0 | 0 | 0 | 0 | 0 | 0 | 0 | 0 | 0 | 0 | 0 | 2 | 0 | 0 | 0 | 0 | 0 |
| C18 | Malignant neoplasm of ascending colon                        | 0 | 0 | 0 | 0 | 0 | 0 | 0 | 0 | 0 | 0 | 0 | 0 | 2 | 0 | 0 | 0 | 0 | 0 |
| C18 | Malignant neoplasm of hepatic flexure                        | 0 | 0 | 0 | 0 | 0 | 0 | 0 | 0 | 0 | 0 | 0 | 0 | 2 | 0 | 0 | 0 | 0 | 0 |
| C18 | Malignant neoplasm of transverse colon                       | 0 | 0 | 0 | 0 | 0 | 0 | 0 | 0 | 0 | 0 | 0 | 0 | 2 | 0 | 0 | 0 | 0 | 0 |
| C18 | Malignant neoplasm of splenic flexure                        | 0 | 0 | 0 | 0 | 0 | 0 | 0 | 0 | 0 | 0 | 0 | 0 | 2 | 0 | 0 | 0 | 0 | 0 |
| C18 | Malignant neoplasm of descending colon                       | 0 | 0 | 0 | 0 | 0 | 0 | 0 | 0 | 0 | 0 | 0 | 0 | 2 | 0 | 0 | 0 | 0 | 0 |
| C18 | Malignant neoplasm of sigmoid colon                          | 0 | 0 | 0 | 0 | 0 | 0 | 0 | 0 | 0 | 0 | 0 | 0 | 2 | 0 | 0 | 0 | 0 | 0 |
| C18 | Malignant neoplasm overlapping lesion of colon               | 0 | 0 | 0 | 0 | 0 | 0 | 0 | 0 | 0 | 0 | 0 | 0 | 2 | 0 | 0 | 0 | 0 | 0 |
| C18 | Malignant neoplasm of colon, unspecified                     | 0 | 0 | 0 | 0 | 0 | 0 | 0 | 0 | 0 | 0 | 0 | 0 | 2 | 0 | 0 | 0 | 0 | 0 |
| C19 | Malignant neoplasm of rectosigmoid junction                  | 0 | 0 | 0 | 0 | 0 | 0 | 0 | 0 | 0 | 0 | 0 | 0 | 2 | 0 | 0 | 0 | 0 | 0 |
| C20 | Malignant neoplasm of rectum                                 | 0 | 0 | 0 | 0 | 0 | 0 | 0 | 0 | 0 | 0 | 0 | 0 | 2 | 0 | 0 | 0 | 0 | 0 |
| C21 | Malignant neoplasm of anus and anal canal                    | 0 | 0 | 0 | 0 | 0 | 0 | 0 | 0 | 0 | 0 | 0 | 0 | 2 | 0 | 0 | 0 | 0 | 0 |
| C21 | Malignant neoplasm of anus, unspecified                      | 0 | 0 | 0 | 0 | 0 | 0 | 0 | 0 | 0 | 0 | 0 | 0 | 2 | 0 | 0 | 0 | 0 | 0 |

|     |                                                                 |   |   |   |   |   |   |   |   |   |   |   |   |   |   |   |   |   |   |
|-----|-----------------------------------------------------------------|---|---|---|---|---|---|---|---|---|---|---|---|---|---|---|---|---|---|
| C21 | .1 Malignant neoplasm of anal canal                             | 0 | 0 | 0 | 0 | 0 | 0 | 0 | 0 | 0 | 0 | 0 | 0 | 2 | 0 | 0 | 0 | 0 | 0 |
| C21 | .2 Malignant neoplasm of cloacogenic zone                       | 0 | 0 | 0 | 0 | 0 | 0 | 0 | 0 | 0 | 0 | 0 | 0 | 2 | 0 | 0 | 0 | 0 | 0 |
| C21 | .8 Malig neo, overlapping lesion of rectum, anus and anal canal | 0 | 0 | 0 | 0 | 0 | 0 | 0 | 0 | 0 | 0 | 0 | 0 | 2 | 0 | 0 | 0 | 0 | 0 |
| C22 | Malignant neoplasm of liver and intrahepatic bile ducts         | 0 | 0 | 0 | 0 | 0 | 0 | 0 | 0 | 0 | 0 | 0 | 0 | 2 | 0 | 0 | 0 | 0 | 0 |
| C22 | .0 Malignant neoplasm, liver cell carcinoma                     | 0 | 0 | 0 | 0 | 0 | 0 | 0 | 0 | 0 | 0 | 0 | 0 | 2 | 0 | 0 | 0 | 0 | 0 |
| C22 | .1 Malignant neoplasm, intrahep bile duct carcinoma             | 0 | 0 | 0 | 0 | 0 | 0 | 0 | 0 | 0 | 0 | 0 | 0 | 2 | 0 | 0 | 0 | 0 | 0 |
| C22 | .2 Malignant neoplasm, hepatoblastoma                           | 0 | 0 | 0 | 0 | 0 | 0 | 0 | 0 | 0 | 0 | 0 | 0 | 2 | 0 | 0 | 0 | 0 | 0 |
| C22 | .3 Malignant neoplasm, angiosarcoma of liver                    | 0 | 0 | 0 | 0 | 0 | 0 | 0 | 0 | 0 | 0 | 0 | 0 | 2 | 0 | 0 | 0 | 0 | 0 |
| C22 | .4 Malignant neoplasm, other sarcomas of liver                  | 0 | 0 | 0 | 0 | 0 | 0 | 0 | 0 | 0 | 0 | 0 | 0 | 2 | 0 | 0 | 0 | 0 | 0 |
| C22 | .7 Malignant neoplasm, oth spec carcinomas of liver             | 0 | 0 | 0 | 0 | 0 | 0 | 0 | 0 | 0 | 0 | 0 | 0 | 2 | 0 | 0 | 0 | 0 | 0 |
| C22 | .9 Malignant neoplasm, liver, unspecified                       | 0 | 0 | 0 | 0 | 0 | 0 | 0 | 0 | 0 | 0 | 0 | 0 | 2 | 0 | 0 | 0 | 0 | 0 |
| C23 | Malignant neoplasm of gallbladder                               | 0 | 0 | 0 | 0 | 0 | 0 | 0 | 0 | 0 | 0 | 0 | 0 | 2 | 0 | 0 | 0 | 0 | 0 |
| C24 | Maligt neoplasm of other and unspec parts biliary tract         | 0 | 0 | 0 | 0 | 0 | 0 | 0 | 0 | 0 | 0 | 0 | 0 | 2 | 0 | 0 | 0 | 0 | 0 |
| C24 | .0 Malignant neoplasm of extrahepatic bile duct                 | 0 | 0 | 0 | 0 | 0 | 0 | 0 | 0 | 0 | 0 | 0 | 0 | 2 | 0 | 0 | 0 | 0 | 0 |
| C24 | .1 Malignant neoplasm of Ampulla of Vater                       | 0 | 0 | 0 | 0 | 0 | 0 | 0 | 0 | 0 | 0 | 0 | 0 | 2 | 0 | 0 | 0 | 0 | 0 |
| C24 | .8 Malignant neoplasm overlapping lesion of biliary tract       | 0 | 0 | 0 | 0 | 0 | 0 | 0 | 0 | 0 | 0 | 0 | 0 | 2 | 0 | 0 | 0 | 0 | 0 |
| C24 | .9 Malignant neoplasm of biliary tract, unspecified             | 0 | 0 | 0 | 0 | 0 | 0 | 0 | 0 | 0 | 0 | 0 | 0 | 2 | 0 | 0 | 0 | 0 | 0 |
| C25 | Malignant neoplasm of pancreas                                  | 0 | 0 | 0 | 0 | 0 | 0 | 0 | 0 | 0 | 0 | 0 | 0 | 2 | 0 | 0 | 0 | 0 | 0 |
| C25 | .0 Malignant neoplasm of head of pancreas                       | 0 | 0 | 0 | 0 | 0 | 0 | 0 | 0 | 0 | 0 | 0 | 0 | 2 | 0 | 0 | 0 | 0 | 0 |
| C25 | .1 Malignant neoplasm of body of pancreas                       | 0 | 0 | 0 | 0 | 0 | 0 | 0 | 0 | 0 | 0 | 0 | 0 | 2 | 0 | 0 | 0 | 0 | 0 |
| C25 | .2 Malignant neoplasm of tail of pancreas                       | 0 | 0 | 0 | 0 | 0 | 0 | 0 | 0 | 0 | 0 | 0 | 0 | 2 | 0 | 0 | 0 | 0 | 0 |
| C25 | .3 Malignant neoplasm of pancreatic duct                        | 0 | 0 | 0 | 0 | 0 | 0 | 0 | 0 | 0 | 0 | 0 | 0 | 2 | 0 | 0 | 0 | 0 | 0 |
| C25 | .4 Malignant neoplasm of endocrine pancreas                     | 0 | 0 | 0 | 0 | 0 | 0 | 0 | 0 | 0 | 0 | 0 | 0 | 2 | 0 | 0 | 0 | 0 | 0 |
| C25 | .7 Malignant neoplasm of other parts of pancreas                | 0 | 0 | 0 | 0 | 0 | 0 | 0 | 0 | 0 | 0 | 0 | 0 | 2 | 0 | 0 | 0 | 0 | 0 |

|       |                                                              |   |   |   |   |   |   |   |   |   |   |   |   |   |   |   |   |   |   |
|-------|--------------------------------------------------------------|---|---|---|---|---|---|---|---|---|---|---|---|---|---|---|---|---|---|
| C25.8 | Malignant neoplasm, overlapping lesion of pancreas           | 0 | 0 | 0 | 0 | 0 | 0 | 0 | 0 | 0 | 0 | 0 | 0 | 2 | 0 | 0 | 0 | 0 | 0 |
| C25.9 | Malignant neoplasm of pancreas, unspecified                  | 0 | 0 | 0 | 0 | 0 | 0 | 0 | 0 | 0 | 0 | 0 | 0 | 2 | 0 | 0 | 0 | 0 | 0 |
| C26   | Malignant neoplasm of other and ill-defined digestive organs | 0 | 0 | 0 | 0 | 0 | 0 | 0 | 0 | 0 | 0 | 0 | 0 | 2 | 0 | 0 | 0 | 0 | 0 |
| C26.0 | Malignant neoplasm of intestinal tract, part unsp            | 0 | 0 | 0 | 0 | 0 | 0 | 0 | 0 | 0 | 0 | 0 | 0 | 2 | 0 | 0 | 0 | 0 | 0 |
| C26.1 | Malignant neoplasm of spleen                                 | 0 | 0 | 0 | 0 | 0 | 0 | 0 | 0 | 0 | 0 | 0 | 0 | 2 | 0 | 0 | 0 | 0 | 0 |
| C26.8 | Malignant neoplasm, overlapping lesion of digestive system   | 0 | 0 | 0 | 0 | 0 | 0 | 0 | 0 | 0 | 0 | 0 | 0 | 2 | 0 | 0 | 0 | 0 | 0 |
| C26.9 | Malignant neoplasm of ill-def sites within digestive system  | 0 | 0 | 0 | 0 | 0 | 0 | 0 | 0 | 0 | 0 | 0 | 0 | 2 | 0 | 0 | 0 | 0 | 0 |
| C30   | Malignant neoplasm of nasal cavity and middle ear            | 0 | 0 | 0 | 0 | 0 | 0 | 0 | 0 | 0 | 0 | 0 | 0 | 2 | 0 | 0 | 0 | 0 | 0 |
| C30.0 | Malignant neoplasm of nasal cavity                           | 0 | 0 | 0 | 0 | 0 | 0 | 0 | 0 | 0 | 0 | 0 | 0 | 2 | 0 | 0 | 0 | 0 | 0 |
| C30.1 | Malignant neoplasm of middle ear                             | 0 | 0 | 0 | 0 | 0 | 0 | 0 | 0 | 0 | 0 | 0 | 0 | 2 | 0 | 0 | 0 | 0 | 0 |
| C31   | Malignant neoplasm of accessory sinuses                      | 0 | 0 | 0 | 0 | 0 | 0 | 0 | 0 | 0 | 0 | 0 | 0 | 2 | 0 | 0 | 0 | 0 | 0 |
| C31.0 | Malignant neoplasm of maxillary sinus                        | 0 | 0 | 0 | 0 | 0 | 0 | 0 | 0 | 0 | 0 | 0 | 0 | 2 | 0 | 0 | 0 | 0 | 0 |
| C31.1 | Malignant neoplasm of ethmoidal sinus                        | 0 | 0 | 0 | 0 | 0 | 0 | 0 | 0 | 0 | 0 | 0 | 0 | 2 | 0 | 0 | 0 | 0 | 0 |
| C31.2 | Malignant neoplasm of frontal sinus                          | 0 | 0 | 0 | 0 | 0 | 0 | 0 | 0 | 0 | 0 | 0 | 0 | 2 | 0 | 0 | 0 | 0 | 0 |
| C31.3 | Malignant neoplasm of sphenoidal sinus                       | 0 | 0 | 0 | 0 | 0 | 0 | 0 | 0 | 0 | 0 | 0 | 0 | 2 | 0 | 0 | 0 | 0 | 0 |
| C31.8 | Malignant neoplasm, overlapping lesion accessory sinuses     | 0 | 0 | 0 | 0 | 0 | 0 | 0 | 0 | 0 | 0 | 0 | 0 | 2 | 0 | 0 | 0 | 0 | 0 |
| C31.9 | Malignant neoplasm of accessory sinus, unsp                  | 0 | 0 | 0 | 0 | 0 | 0 | 0 | 0 | 0 | 0 | 0 | 0 | 2 | 0 | 0 | 0 | 0 | 0 |
| C32   | Malignant neoplasm of larynx                                 | 0 | 0 | 0 | 0 | 0 | 0 | 0 | 0 | 0 | 0 | 0 | 0 | 2 | 0 | 0 | 0 | 0 | 0 |
| C32.0 | Malignant neoplasm of glottis                                | 0 | 0 | 0 | 0 | 0 | 0 | 0 | 0 | 0 | 0 | 0 | 0 | 2 | 0 | 0 | 0 | 0 | 0 |
| C32.1 | Malignant neoplasm of supraglottis                           | 0 | 0 | 0 | 0 | 0 | 0 | 0 | 0 | 0 | 0 | 0 | 0 | 2 | 0 | 0 | 0 | 0 | 0 |
| C32.2 | Malignant neoplasm of subglottis                             | 0 | 0 | 0 | 0 | 0 | 0 | 0 | 0 | 0 | 0 | 0 | 0 | 2 | 0 | 0 | 0 | 0 | 0 |
| C32.3 | Malignant neoplasm of laryngeal cartilage                    | 0 | 0 | 0 | 0 | 0 | 0 | 0 | 0 | 0 | 0 | 0 | 0 | 2 | 0 | 0 | 0 | 0 | 0 |
| C32.8 | Malignant neoplasm, overlapping lesion of larynx             | 0 | 0 | 0 | 0 | 0 | 0 | 0 | 0 | 0 | 0 | 0 | 0 | 2 | 0 | 0 | 0 | 0 | 0 |
| C32.9 | Malignant neoplasm of larynx, unspecified                    | 0 | 0 | 0 | 0 | 0 | 0 | 0 | 0 | 0 | 0 | 0 | 0 | 2 | 0 | 0 | 0 | 0 | 0 |

|     |                                                               |   |   |   |   |   |   |   |   |   |   |   |   |   |   |   |   |   |   |
|-----|---------------------------------------------------------------|---|---|---|---|---|---|---|---|---|---|---|---|---|---|---|---|---|---|
| C33 | Malignant neoplasm of trachea                                 | 0 | 0 | 0 | 0 | 0 | 0 | 0 | 0 | 0 | 0 | 0 | 0 | 2 | 0 | 0 | 0 | 0 | 0 |
| C34 | Malignant neoplasm of bronchus and lung                       | 0 | 0 | 0 | 0 | 0 | 0 | 0 | 0 | 0 | 0 | 0 | 0 | 2 | 0 | 0 | 0 | 0 | 0 |
| C34 | Malignant neoplasm of main bronchus                           | 0 | 0 | 0 | 0 | 0 | 0 | 0 | 0 | 0 | 0 | 0 | 0 | 2 | 0 | 0 | 0 | 0 | 0 |
| C34 | Malignant neoplasm of upper lobe, bronchus or lung            | 0 | 0 | 0 | 0 | 0 | 0 | 0 | 0 | 0 | 0 | 0 | 0 | 2 | 0 | 0 | 0 | 0 | 0 |
| C34 | Malignant neoplasm of middle lobe, bronchus or lung           | 0 | 0 | 0 | 0 | 0 | 0 | 0 | 0 | 0 | 0 | 0 | 0 | 2 | 0 | 0 | 0 | 0 | 0 |
| C34 | Malignant neoplasm of lower lobe, bronchus or lung            | 0 | 0 | 0 | 0 | 0 | 0 | 0 | 0 | 0 | 0 | 0 | 0 | 2 | 0 | 0 | 0 | 0 | 0 |
| C34 | Malignant neoplasm of overlap les of bronchus & lung          | 0 | 0 | 0 | 0 | 0 | 0 | 0 | 0 | 0 | 0 | 0 | 0 | 2 | 0 | 0 | 0 | 0 | 0 |
| C34 | Malignant neoplasm of bronchus or lung, unsp                  | 0 | 0 | 0 | 0 | 0 | 0 | 0 | 0 | 0 | 0 | 0 | 0 | 2 | 0 | 0 | 0 | 0 | 0 |
| C37 | Malignant neoplasm of thymus                                  | 0 | 0 | 0 | 0 | 0 | 0 | 0 | 0 | 0 | 0 | 0 | 0 | 2 | 0 | 0 | 0 | 0 | 0 |
| C38 | Malignant neoplasm of heart, mediastinum and pleura           | 0 | 0 | 0 | 0 | 0 | 0 | 0 | 0 | 0 | 0 | 0 | 0 | 2 | 0 | 0 | 0 | 0 | 0 |
| C38 | Malignant neoplasm of heart, mediastinum & pleura, heart      | 0 | 0 | 0 | 0 | 0 | 0 | 0 | 0 | 0 | 0 | 0 | 0 | 2 | 0 | 0 | 0 | 0 | 0 |
| C38 | Malignant neoplasm of anterior mediastinum                    | 0 | 0 | 0 | 0 | 0 | 0 | 0 | 0 | 0 | 0 | 0 | 0 | 2 | 0 | 0 | 0 | 0 | 0 |
| C38 | Malignant neoplasm of posterior mediastinum                   | 0 | 0 | 0 | 0 | 0 | 0 | 0 | 0 | 0 | 0 | 0 | 0 | 2 | 0 | 0 | 0 | 0 | 0 |
| C38 | Malig neo heart, mediastinum & pleura,mediastinum,part unsp   | 0 | 0 | 0 | 0 | 0 | 0 | 0 | 0 | 0 | 0 | 0 | 0 | 2 | 0 | 0 | 0 | 0 | 0 |
| C38 | Malignant neoplasm of pleura                                  | 0 | 0 | 0 | 0 | 0 | 0 | 0 | 0 | 0 | 0 | 0 | 0 | 2 | 0 | 0 | 0 | 0 | 0 |
| C38 | Malig neo, overlapping lesion of heart, mediastinum & pleura  | 0 | 0 | 0 | 0 | 0 | 0 | 0 | 0 | 0 | 0 | 0 | 0 | 2 | 0 | 0 | 0 | 0 | 0 |
| C39 | Malig neo oth + ill-def sites resp sys + intrathorac orgs     | 0 | 0 | 0 | 0 | 0 | 0 | 0 | 0 | 0 | 0 | 0 | 0 | 2 | 0 | 0 | 0 | 0 | 0 |
| C39 | Malignant neoplasm of upper respiratory tract, part unsp      | 0 | 0 | 0 | 0 | 0 | 0 | 0 | 0 | 0 | 0 | 0 | 0 | 2 | 0 | 0 | 0 | 0 | 0 |
| C39 | Malignant neoplasm, overlap lesion of resp & intrathorac orgs | 0 | 0 | 0 | 0 | 0 | 0 | 0 | 0 | 0 | 0 | 0 | 0 | 2 | 0 | 0 | 0 | 0 | 0 |
| C39 | Malignant neoplasm of ill-def sites within the resp sys       | 0 | 0 | 0 | 0 | 0 | 0 | 0 | 0 | 0 | 0 | 0 | 0 | 2 | 0 | 0 | 0 | 0 | 0 |
| C40 | Malignant neoplasm of bone and articular cartilage of limbs   | 0 | 0 | 0 | 0 | 0 | 0 | 0 | 0 | 0 | 0 | 0 | 0 | 2 | 0 | 0 | 0 | 0 | 0 |
| C40 | Malignant neoplasm of scapula and long bones of upper limb    | 0 | 0 | 0 | 0 | 0 | 0 | 0 | 0 | 0 | 0 | 0 | 0 | 2 | 0 | 0 | 0 | 0 | 0 |
| C40 | Malignant neoplasm of short bones of upper limb               | 0 | 0 | 0 | 0 | 0 | 0 | 0 | 0 | 0 | 0 | 0 | 0 | 2 | 0 | 0 | 0 | 0 | 0 |
| C40 | Malignant neoplasm of long bones of lower limb                | 0 | 0 | 0 | 0 | 0 | 0 | 0 | 0 | 0 | 0 | 0 | 0 | 2 | 0 | 0 | 0 | 0 | 0 |

|     |                                                              |   |   |   |   |   |   |   |   |   |   |   |   |   |   |   |   |   |   |
|-----|--------------------------------------------------------------|---|---|---|---|---|---|---|---|---|---|---|---|---|---|---|---|---|---|
| C40 | Malignant neoplasm of short bones of lower limb              | 0 | 0 | 0 | 0 | 0 | 0 | 0 | 0 | 0 | 0 | 0 | 0 | 2 | 0 | 0 | 0 | 0 | 0 |
| C40 | Malignant neoplasm, overlap les bone and artic cart of limbs | 0 | 0 | 0 | 0 | 0 | 0 | 0 | 0 | 0 | 0 | 0 | 0 | 2 | 0 | 0 | 0 | 0 | 0 |
| C40 | Malignant neoplasm of bone and artic cart of limb, unsp      | 0 | 0 | 0 | 0 | 0 | 0 | 0 | 0 | 0 | 0 | 0 | 0 | 2 | 0 | 0 | 0 | 0 | 0 |
| C41 | Malig neo bone + articular cartilage of oth + unspeci sites  | 0 | 0 | 0 | 0 | 0 | 0 | 0 | 0 | 0 | 0 | 0 | 0 | 2 | 0 | 0 | 0 | 0 | 0 |
| C41 | Malignant neoplasm of bones of skull and face                | 0 | 0 | 0 | 0 | 0 | 0 | 0 | 0 | 0 | 0 | 0 | 0 | 2 | 0 | 0 | 0 | 0 | 0 |
| C41 | .1 Malignant neoplasm of mandible                            | 0 | 0 | 0 | 0 | 0 | 0 | 0 | 0 | 0 | 0 | 0 | 0 | 2 | 0 | 0 | 0 | 0 | 0 |
| C41 | .2 Malignant neoplasm of vertebral column                    | 0 | 0 | 0 | 0 | 0 | 0 | 0 | 0 | 0 | 0 | 0 | 0 | 2 | 0 | 0 | 0 | 0 | 0 |
| C41 | .3 Malignant neoplasm of ribs, sternum and clavicle          | 0 | 0 | 0 | 0 | 0 | 0 | 0 | 0 | 0 | 0 | 0 | 0 | 2 | 0 | 0 | 0 | 0 | 0 |
| C41 | .4 Malignant neoplasm of sacrum and coccyx                   | 0 | 0 | 0 | 0 | 0 | 0 | 0 | 0 | 0 | 0 | 0 | 0 | 2 | 0 | 0 | 0 | 0 | 0 |
| C41 | .8 Malignant neoplasm, overlap lesion bon and articular cart | 0 | 0 | 0 | 0 | 0 | 0 | 0 | 0 | 0 | 0 | 0 | 0 | 2 | 0 | 0 | 0 | 0 | 0 |
| C41 | .9 Malignant neoplasm of bone and articular cartilage, unsp  | 0 | 0 | 0 | 0 | 0 | 0 | 0 | 0 | 0 | 0 | 0 | 0 | 2 | 0 | 0 | 0 | 0 | 0 |
| C43 | Malignant melanoma of skin                                   | 0 | 0 | 0 | 0 | 0 | 0 | 0 | 0 | 0 | 0 | 0 | 0 | 2 | 0 | 0 | 0 | 0 | 0 |
| C43 | .0 Malignant melanoma of lip                                 | 0 | 0 | 0 | 0 | 0 | 0 | 0 | 0 | 0 | 0 | 0 | 0 | 2 | 0 | 0 | 0 | 0 | 0 |
| C43 | .1 Malignant melanoma of eyelid, including canthus           | 0 | 0 | 0 | 0 | 0 | 0 | 0 | 0 | 0 | 0 | 0 | 0 | 2 | 0 | 0 | 0 | 0 | 0 |
| C43 | .2 Malignant melanoma of ear and ext auricular canal         | 0 | 0 | 0 | 0 | 0 | 0 | 0 | 0 | 0 | 0 | 0 | 0 | 2 | 0 | 0 | 0 | 0 | 0 |
| C43 | .3 Malignant melanoma of other and unspecified parts of face | 0 | 0 | 0 | 0 | 0 | 0 | 0 | 0 | 0 | 0 | 0 | 0 | 2 | 0 | 0 | 0 | 0 | 0 |
| C43 | .4 Malignant melanoma of scalp and neck                      | 0 | 0 | 0 | 0 | 0 | 0 | 0 | 0 | 0 | 0 | 0 | 0 | 2 | 0 | 0 | 0 | 0 | 0 |
| C43 | .5 Malignant melanoma of trunk                               | 0 | 0 | 0 | 0 | 0 | 0 | 0 | 0 | 0 | 0 | 0 | 0 | 2 | 0 | 0 | 0 | 0 | 0 |
| C43 | .6 Malignant melanoma of upper limb, including shoulder      | 0 | 0 | 0 | 0 | 0 | 0 | 0 | 0 | 0 | 0 | 0 | 0 | 2 | 0 | 0 | 0 | 0 | 0 |
| C43 | .7 Malignant melanoma of lower limb, including hip           | 0 | 0 | 0 | 0 | 0 | 0 | 0 | 0 | 0 | 0 | 0 | 0 | 2 | 0 | 0 | 0 | 0 | 0 |
| C43 | .8 Malignant melanoma of skin                                | 0 | 0 | 0 | 0 | 0 | 0 | 0 | 0 | 0 | 0 | 0 | 0 | 2 | 0 | 0 | 0 | 0 | 0 |
| C43 | .9 Malignant melanoma of skin, unsp                          | 0 | 0 | 0 | 0 | 0 | 0 | 0 | 0 | 0 | 0 | 0 | 0 | 2 | 0 | 0 | 0 | 0 | 0 |
| C44 | Other malignant neoplasms of skin                            | 0 | 0 | 0 | 0 | 0 | 0 | 0 | 0 | 0 | 0 | 0 | 0 | 2 | 0 | 0 | 0 | 0 | 0 |
| C44 | .0 Other malignant neoplasms of skin of lip                  | 0 | 0 | 0 | 0 | 0 | 0 | 0 | 0 | 0 | 0 | 0 | 0 | 2 | 0 | 0 | 0 | 0 | 0 |



|     |                                                              |   |   |   |   |   |   |   |   |   |   |   |   |   |   |   |   |   |   |
|-----|--------------------------------------------------------------|---|---|---|---|---|---|---|---|---|---|---|---|---|---|---|---|---|---|
| C44 | Other malignant neoplasms of skin of eyelid, incl canthus    | 0 | 0 | 0 | 0 | 0 | 0 | 0 | 0 | 0 | 0 | 0 | 0 | 2 | 0 | 0 | 0 | 0 | 0 |
| C44 | Oth malignant neoplasms of skin of ear & ext auricular canal | 0 | 0 | 0 | 0 | 0 | 0 | 0 | 0 | 0 | 0 | 0 | 0 | 2 | 0 | 0 | 0 | 0 | 0 |
| C44 | Oth malignant neoplasm of skin of oth & unsp parts of face   | 0 | 0 | 0 | 0 | 0 | 0 | 0 | 0 | 0 | 0 | 0 | 0 | 2 | 0 | 0 | 0 | 0 | 0 |
| C44 | Other malignant neoplasms of skin of scalp and neck          | 0 | 0 | 0 | 0 | 0 | 0 | 0 | 0 | 0 | 0 | 0 | 0 | 2 | 0 | 0 | 0 | 0 | 0 |
| C44 | Other malignant neoplasms of skin of trunk                   | 0 | 0 | 0 | 0 | 0 | 0 | 0 | 0 | 0 | 0 | 0 | 0 | 2 | 0 | 0 | 0 | 0 | 0 |
| C44 | Oth malignant neoplasms of skin of upper limb, incl shoulder | 0 | 0 | 0 | 0 | 0 | 0 | 0 | 0 | 0 | 0 | 0 | 0 | 2 | 0 | 0 | 0 | 0 | 0 |
| C44 | Other malignant neoplasms of skin of lower limb, incl hip    | 0 | 0 | 0 | 0 | 0 | 0 | 0 | 0 | 0 | 0 | 0 | 0 | 2 | 0 | 0 | 0 | 0 | 0 |
| C44 | Other malignant neoplasms, overlapping lesion of skin        | 0 | 0 | 0 | 0 | 0 | 0 | 0 | 0 | 0 | 0 | 0 | 0 | 2 | 0 | 0 | 0 | 0 | 0 |
| C44 | Other malignant neoplasms of skin, unspecified               | 0 | 0 | 0 | 0 | 0 | 0 | 0 | 0 | 0 | 0 | 0 | 0 | 2 | 0 | 0 | 0 | 0 | 0 |
| C45 | Mesothelioma                                                 | 0 | 0 | 0 | 0 | 0 | 0 | 0 | 0 | 0 | 0 | 0 | 0 | 2 | 0 | 0 | 0 | 0 | 0 |
| C45 | .0 Mesothelioma of pleura                                    | 0 | 0 | 0 | 0 | 0 | 0 | 0 | 0 | 0 | 0 | 0 | 0 | 2 | 0 | 0 | 0 | 0 | 0 |
| C45 | .1 Mesothelioma of peritoneum                                | 0 | 0 | 0 | 0 | 0 | 0 | 0 | 0 | 0 | 0 | 0 | 0 | 2 | 0 | 0 | 0 | 0 | 0 |
| C45 | .2 Mesothelioma of pericardium                               | 0 | 0 | 0 | 0 | 0 | 0 | 0 | 0 | 0 | 0 | 0 | 0 | 2 | 0 | 0 | 0 | 0 | 0 |
| C45 | .7 Mesothelioma of other sites                               | 0 | 0 | 0 | 0 | 0 | 0 | 0 | 0 | 0 | 0 | 0 | 0 | 2 | 0 | 0 | 0 | 0 | 0 |
| C45 | .9 Mesothelioma, unspecified                                 | 0 | 0 | 0 | 0 | 0 | 0 | 0 | 0 | 0 | 0 | 0 | 0 | 2 | 0 | 0 | 0 | 0 | 0 |
| C46 | Kaposi's sarcoma                                             | 0 | 0 | 0 | 0 | 0 | 0 | 0 | 0 | 0 | 0 | 0 | 0 | 2 | 0 | 0 | 0 | 0 | 0 |
| C46 | .0 Kaposi's sarcoma of skin                                  | 0 | 0 | 0 | 0 | 0 | 0 | 0 | 0 | 0 | 0 | 0 | 0 | 2 | 0 | 0 | 0 | 0 | 0 |
| C46 | .1 Kaposi's sarcoma of soft tissue                           | 0 | 0 | 0 | 0 | 0 | 0 | 0 | 0 | 0 | 0 | 0 | 0 | 2 | 0 | 0 | 0 | 0 | 0 |
| C46 | .2 Kaposi's sarcoma of palate                                | 0 | 0 | 0 | 0 | 0 | 0 | 0 | 0 | 0 | 0 | 0 | 0 | 2 | 0 | 0 | 0 | 0 | 0 |
| C46 | .3 Kaposi's sarcoma of lymph nodes                           | 0 | 0 | 0 | 0 | 0 | 0 | 0 | 0 | 0 | 0 | 0 | 0 | 2 | 0 | 0 | 0 | 0 | 0 |
| C46 | .7 Kaposi's sarcoma of other sites                           | 0 | 0 | 0 | 0 | 0 | 0 | 0 | 0 | 0 | 0 | 0 | 0 | 2 | 0 | 0 | 0 | 0 | 0 |
| C46 | .8 Kaposi's sarcoma of multiple organs                       | 0 | 0 | 0 | 0 | 0 | 0 | 0 | 0 | 0 | 0 | 0 | 0 | 2 | 0 | 0 | 0 | 0 | 0 |
| C46 | .9 Kaposi's sarcoma, unspecified                             | 0 | 0 | 0 | 0 | 0 | 0 | 0 | 0 | 0 | 0 | 0 | 0 | 2 | 0 | 0 | 0 | 0 | 0 |
| C47 | Malignant neo peripheral nerves and autonomic nervous syst   | 0 | 0 | 0 | 0 | 0 | 0 | 0 | 0 | 0 | 0 | 0 | 0 | 2 | 0 | 0 | 0 | 0 | 0 |

|     |                                                               |   |   |   |   |   |   |   |   |   |   |   |   |   |   |   |   |   |   |   |
|-----|---------------------------------------------------------------|---|---|---|---|---|---|---|---|---|---|---|---|---|---|---|---|---|---|---|
| C47 | Malignant neoplasm of peripheral nerve of head, face & neck   | 0 | 0 | 0 | 0 | 0 | 0 | 0 | 0 | 0 | 0 | 0 | 0 | 0 | 2 | 0 | 0 | 0 | 0 | 0 |
| C47 | Malignant neoplasm of peripheral nerve, upp limb, incl should | 0 | 0 | 0 | 0 | 0 | 0 | 0 | 0 | 0 | 0 | 0 | 0 | 0 | 2 | 0 | 0 | 0 | 0 | 0 |
| C47 | Malignant neoplasm of peripheral nerve of low limb, incl hip  | 0 | 0 | 0 | 0 | 0 | 0 | 0 | 0 | 0 | 0 | 0 | 0 | 0 | 2 | 0 | 0 | 0 | 0 | 0 |
| C47 | Malignant neoplasm of peripheral nerve of thorax              | 0 | 0 | 0 | 0 | 0 | 0 | 0 | 0 | 0 | 0 | 0 | 0 | 0 | 2 | 0 | 0 | 0 | 0 | 0 |
| C47 | Malignant neoplasm of peripheral nerve of abdomen             | 0 | 0 | 0 | 0 | 0 | 0 | 0 | 0 | 0 | 0 | 0 | 0 | 0 | 2 | 0 | 0 | 0 | 0 | 0 |
| C47 | Malignant neoplasm of peripheral nerve of pelvis              | 0 | 0 | 0 | 0 | 0 | 0 | 0 | 0 | 0 | 0 | 0 | 0 | 0 | 2 | 0 | 0 | 0 | 0 | 0 |
| C47 | Malignant neoplasm of peripheral nerve of trunk, unsp         | 0 | 0 | 0 | 0 | 0 | 0 | 0 | 0 | 0 | 0 | 0 | 0 | 0 | 2 | 0 | 0 | 0 | 0 | 0 |
| C47 | Malignant neoplasm, overlap lesion periph nerve & auton ns    | 0 | 0 | 0 | 0 | 0 | 0 | 0 | 0 | 0 | 0 | 0 | 0 | 0 | 2 | 0 | 0 | 0 | 0 | 0 |
| C47 | Malignant neoplasm periph nerve & autonomic ns, unsp          | 0 | 0 | 0 | 0 | 0 | 0 | 0 | 0 | 0 | 0 | 0 | 0 | 0 | 2 | 0 | 0 | 0 | 0 | 0 |
| C48 | Malignant neoplasm of retroperitoneum and peritoneum          | 0 | 0 | 0 | 0 | 0 | 0 | 0 | 0 | 0 | 0 | 0 | 0 | 0 | 2 | 0 | 0 | 0 | 0 | 0 |
| C48 | Malignant neoplasm of retroperitoneum                         | 0 | 0 | 0 | 0 | 0 | 0 | 0 | 0 | 0 | 0 | 0 | 0 | 0 | 2 | 0 | 0 | 0 | 0 | 0 |
| C48 | Malignant neoplasm of spec parts of peritoneum                | 0 | 0 | 0 | 0 | 0 | 0 | 0 | 0 | 0 | 0 | 0 | 0 | 0 | 2 | 0 | 0 | 0 | 0 | 0 |
| C48 | Malignant neoplasm of peritoneum, unsp                        | 0 | 0 | 0 | 0 | 0 | 0 | 0 | 0 | 0 | 0 | 0 | 0 | 0 | 2 | 0 | 0 | 0 | 0 | 0 |
| C48 | Malignant neoplasm of overlap lesion retroperit & peritoneum  | 0 | 0 | 0 | 0 | 0 | 0 | 0 | 0 | 0 | 0 | 0 | 0 | 0 | 2 | 0 | 0 | 0 | 0 | 0 |
| C49 | Malignant neoplasm of other connective and soft tissue        | 0 | 0 | 0 | 0 | 0 | 0 | 0 | 0 | 0 | 0 | 0 | 0 | 0 | 2 | 0 | 0 | 0 | 0 | 0 |
| C49 | Malignant neoplasm of conn and soft tiss head, face & neck    | 0 | 0 | 0 | 0 | 0 | 0 | 0 | 0 | 0 | 0 | 0 | 0 | 0 | 2 | 0 | 0 | 0 | 0 | 0 |
| C49 | Malignant neoplasm of conn and soft tiss upp limb, inc should | 0 | 0 | 0 | 0 | 0 | 0 | 0 | 0 | 0 | 0 | 0 | 0 | 0 | 2 | 0 | 0 | 0 | 0 | 0 |
| C49 | Malignant neoplasm of conn and soft tiss, lower limb, inc hip | 0 | 0 | 0 | 0 | 0 | 0 | 0 | 0 | 0 | 0 | 0 | 0 | 0 | 2 | 0 | 0 | 0 | 0 | 0 |
| C49 | Malignant neoplasm of conn and soft tiss of thorax            | 0 | 0 | 0 | 0 | 0 | 0 | 0 | 0 | 0 | 0 | 0 | 0 | 0 | 2 | 0 | 0 | 0 | 0 | 0 |
| C49 | Malignant neoplasm of conn and soft tiss of abdomen           | 0 | 0 | 0 | 0 | 0 | 0 | 0 | 0 | 0 | 0 | 0 | 0 | 0 | 2 | 0 | 0 | 0 | 0 | 0 |
| C49 | Malignant neoplasm of conn and soft tiss of pelvis            | 0 | 0 | 0 | 0 | 0 | 0 | 0 | 0 | 0 | 0 | 0 | 0 | 0 | 2 | 0 | 0 | 0 | 0 | 0 |
| C49 | Malignant neoplasm of conn and soft tiss of trunk, unsp       | 0 | 0 | 0 | 0 | 0 | 0 | 0 | 0 | 0 | 0 | 0 | 0 | 0 | 2 | 0 | 0 | 0 | 0 | 0 |
| C49 | Malignant neoplasm, overlap lesion connective & soft tiss     | 0 | 0 | 0 | 0 | 0 | 0 | 0 | 0 | 0 | 0 | 0 | 0 | 0 | 2 | 0 | 0 | 0 | 0 | 0 |
| C49 | Malignant neoplasm of connective and soft tissue, unsp        | 0 | 0 | 0 | 0 | 0 | 0 | 0 | 0 | 0 | 0 | 0 | 0 | 0 | 2 | 0 | 0 | 0 | 0 | 0 |

|     |                                                           |   |   |   |   |   |   |   |   |   |   |   |   |   |   |   |   |   |   |
|-----|-----------------------------------------------------------|---|---|---|---|---|---|---|---|---|---|---|---|---|---|---|---|---|---|
| C50 | Malignant neoplasm of breast                              | 0 | 0 | 0 | 0 | 0 | 0 | 0 | 0 | 0 | 0 | 0 | 0 | 2 | 0 | 0 | 0 | 0 | 0 |
| C50 | .0 Malignant neoplasm of nipple and areola                | 0 | 0 | 0 | 0 | 0 | 0 | 0 | 0 | 0 | 0 | 0 | 0 | 2 | 0 | 0 | 0 | 0 | 0 |
| C50 | .1 Malignant neoplasm of central portion of breast        | 0 | 0 | 0 | 0 | 0 | 0 | 0 | 0 | 0 | 0 | 0 | 0 | 2 | 0 | 0 | 0 | 0 | 0 |
| C50 | .2 Malignant neoplasm of upper-inner quadrant of breast   | 0 | 0 | 0 | 0 | 0 | 0 | 0 | 0 | 0 | 0 | 0 | 0 | 2 | 0 | 0 | 0 | 0 | 0 |
| C50 | .3 Malignant neoplasm of lower-inner quadrant of breast   | 0 | 0 | 0 | 0 | 0 | 0 | 0 | 0 | 0 | 0 | 0 | 0 | 2 | 0 | 0 | 0 | 0 | 0 |
| C50 | .4 Malignant neoplasm of upper-outer quadrant of breast   | 0 | 0 | 0 | 0 | 0 | 0 | 0 | 0 | 0 | 0 | 0 | 0 | 2 | 0 | 0 | 0 | 0 | 0 |
| C50 | .5 Malignant neoplasm of lower-outer quadrant of breast   | 0 | 0 | 0 | 0 | 0 | 0 | 0 | 0 | 0 | 0 | 0 | 0 | 2 | 0 | 0 | 0 | 0 | 0 |
| C50 | .6 Malignant neoplasm of axillary tail of breast          | 0 | 0 | 0 | 0 | 0 | 0 | 0 | 0 | 0 | 0 | 0 | 0 | 2 | 0 | 0 | 0 | 0 | 0 |
| C50 | .8 Malignant neoplasm, overlapping lesion of breast       | 0 | 0 | 0 | 0 | 0 | 0 | 0 | 0 | 0 | 0 | 0 | 0 | 2 | 0 | 0 | 0 | 0 | 0 |
| C50 | .9 Malignant neoplasm of breast, unspecified              | 0 | 0 | 0 | 0 | 0 | 0 | 0 | 0 | 0 | 0 | 0 | 0 | 2 | 0 | 0 | 0 | 0 | 0 |
| C51 | Malignant neoplasm of vulva                               | 0 | 0 | 0 | 0 | 0 | 0 | 0 | 0 | 0 | 0 | 0 | 0 | 2 | 0 | 0 | 0 | 0 | 0 |
| C51 | .0 Malignant neoplasm of labium majus                     | 0 | 0 | 0 | 0 | 0 | 0 | 0 | 0 | 0 | 0 | 0 | 0 | 2 | 0 | 0 | 0 | 0 | 0 |
| C51 | .1 Malignant neoplasm of labium minus                     | 0 | 0 | 0 | 0 | 0 | 0 | 0 | 0 | 0 | 0 | 0 | 0 | 2 | 0 | 0 | 0 | 0 | 0 |
| C51 | .2 Malignant neoplasm of clitoris                         | 0 | 0 | 0 | 0 | 0 | 0 | 0 | 0 | 0 | 0 | 0 | 0 | 2 | 0 | 0 | 0 | 0 | 0 |
| C51 | .8 Malignant neoplasm of overlapping lesion of vulva      | 0 | 0 | 0 | 0 | 0 | 0 | 0 | 0 | 0 | 0 | 0 | 0 | 2 | 0 | 0 | 0 | 0 | 0 |
| C51 | .9 Malignant neoplasm of vulva, unspecified               | 0 | 0 | 0 | 0 | 0 | 0 | 0 | 0 | 0 | 0 | 0 | 0 | 2 | 0 | 0 | 0 | 0 | 0 |
| C52 | Malignant neoplasm of vagina                              | 0 | 0 | 0 | 0 | 0 | 0 | 0 | 0 | 0 | 0 | 0 | 0 | 2 | 0 | 0 | 0 | 0 | 0 |
| C53 | Malignant neoplasm of cervix uteri                        | 0 | 0 | 0 | 0 | 0 | 0 | 0 | 0 | 0 | 0 | 0 | 0 | 2 | 0 | 0 | 0 | 0 | 0 |
| C53 | .0 Malignant neoplasm of endocervix                       | 0 | 0 | 0 | 0 | 0 | 0 | 0 | 0 | 0 | 0 | 0 | 0 | 2 | 0 | 0 | 0 | 0 | 0 |
| C53 | .1 Malignant neoplasm of exocervix                        | 0 | 0 | 0 | 0 | 0 | 0 | 0 | 0 | 0 | 0 | 0 | 0 | 2 | 0 | 0 | 0 | 0 | 0 |
| C53 | .8 Malignant neoplasm, overlapping lesion of cervix uteri | 0 | 0 | 0 | 0 | 0 | 0 | 0 | 0 | 0 | 0 | 0 | 0 | 2 | 0 | 0 | 0 | 0 | 0 |
| C53 | .9 Malignant neoplasm of cervix uteri, unsp               | 0 | 0 | 0 | 0 | 0 | 0 | 0 | 0 | 0 | 0 | 0 | 0 | 2 | 0 | 0 | 0 | 0 | 0 |
| C54 | Malignant neoplasm of corpus uteri                        | 0 | 0 | 0 | 0 | 0 | 0 | 0 | 0 | 0 | 0 | 0 | 0 | 2 | 0 | 0 | 0 | 0 | 0 |
| C54 | .0 Malignant neoplasm of isthmus uteri                    | 0 | 0 | 0 | 0 | 0 | 0 | 0 | 0 | 0 | 0 | 0 | 0 | 2 | 0 | 0 | 0 | 0 | 0 |
| C54 | .1 Malignant neoplasm of endometrium                      | 0 | 0 | 0 | 0 | 0 | 0 | 0 | 0 | 0 | 0 | 0 | 0 | 2 | 0 | 0 | 0 | 0 | 0 |

|     |    |                                                              |   |   |   |   |   |   |   |   |   |   |   |   |   |   |   |   |   |   |
|-----|----|--------------------------------------------------------------|---|---|---|---|---|---|---|---|---|---|---|---|---|---|---|---|---|---|
| C54 | .2 | Malignant neoplasm of myometrium                             | 0 | 0 | 0 | 0 | 0 | 0 | 0 | 0 | 0 | 0 | 0 | 0 | 2 | 0 | 0 | 0 | 0 | 0 |
| C54 | .3 | Malignant neoplasm of fundus uteri                           | 0 | 0 | 0 | 0 | 0 | 0 | 0 | 0 | 0 | 0 | 0 | 0 | 2 | 0 | 0 | 0 | 0 | 0 |
| C54 | .8 | Malignant neoplasm overlapping lesion of corpus uteri        | 0 | 0 | 0 | 0 | 0 | 0 | 0 | 0 | 0 | 0 | 0 | 0 | 2 | 0 | 0 | 0 | 0 | 0 |
| C54 | .9 | Malignant neoplasm of corpus uteri, unsp                     | 0 | 0 | 0 | 0 | 0 | 0 | 0 | 0 | 0 | 0 | 0 | 0 | 2 | 0 | 0 | 0 | 0 | 0 |
| C55 |    | Malignant neoplasm of uterus, part unspecified               | 0 | 0 | 0 | 0 | 0 | 0 | 0 | 0 | 0 | 0 | 0 | 0 | 2 | 0 | 0 | 0 | 0 | 0 |
| C56 |    | Malignant neoplasm of ovary                                  | 0 | 0 | 0 | 0 | 0 | 0 | 0 | 0 | 0 | 0 | 0 | 0 | 2 | 0 | 0 | 0 | 0 | 0 |
| C57 |    | Malignant neoplasm of other and unsp female genital orgs     | 0 | 0 | 0 | 0 | 0 | 0 | 0 | 0 | 0 | 0 | 0 | 0 | 2 | 0 | 0 | 0 | 0 | 0 |
| C57 | .0 | Malignant neoplasm of fallopian tube                         | 0 | 0 | 0 | 0 | 0 | 0 | 0 | 0 | 0 | 0 | 0 | 0 | 2 | 0 | 0 | 0 | 0 | 0 |
| C57 | .1 | Malignant neoplasm of broad ligament                         | 0 | 0 | 0 | 0 | 0 | 0 | 0 | 0 | 0 | 0 | 0 | 0 | 2 | 0 | 0 | 0 | 0 | 0 |
| C57 | .2 | Malignant neoplasm of round ligament                         | 0 | 0 | 0 | 0 | 0 | 0 | 0 | 0 | 0 | 0 | 0 | 0 | 2 | 0 | 0 | 0 | 0 | 0 |
| C57 | .3 | Malignant neoplasm of parametrium                            | 0 | 0 | 0 | 0 | 0 | 0 | 0 | 0 | 0 | 0 | 0 | 0 | 2 | 0 | 0 | 0 | 0 | 0 |
| C57 | .4 | Malignant neoplasm of uterine adnexa, unsp                   | 0 | 0 | 0 | 0 | 0 | 0 | 0 | 0 | 0 | 0 | 0 | 0 | 2 | 0 | 0 | 0 | 0 | 0 |
| C57 | .7 | Malignant neoplasm of other specified female genital organs  | 0 | 0 | 0 | 0 | 0 | 0 | 0 | 0 | 0 | 0 | 0 | 0 | 2 | 0 | 0 | 0 | 0 | 0 |
| C57 | .8 | Malignant neoplasm, overlapping lesion female genital organs | 0 | 0 | 0 | 0 | 0 | 0 | 0 | 0 | 0 | 0 | 0 | 0 | 2 | 0 | 0 | 0 | 0 | 0 |
| C57 | .9 | Malignant neoplasm of female genital organ, unspecified      | 0 | 0 | 0 | 0 | 0 | 0 | 0 | 0 | 0 | 0 | 0 | 0 | 2 | 0 | 0 | 0 | 0 | 0 |
| C58 |    | Malignant neoplasm of placenta                               | 0 | 0 | 0 | 0 | 0 | 0 | 0 | 0 | 0 | 0 | 0 | 0 | 2 | 0 | 0 | 0 | 0 | 0 |
| C60 |    | Malignant neoplasm of penis                                  | 0 | 0 | 0 | 0 | 0 | 0 | 0 | 0 | 0 | 0 | 0 | 0 | 2 | 0 | 0 | 0 | 0 | 0 |
| C60 | .0 | Malignant neoplasm of prepuce                                | 0 | 0 | 0 | 0 | 0 | 0 | 0 | 0 | 0 | 0 | 0 | 0 | 2 | 0 | 0 | 0 | 0 | 0 |
| C60 | .1 | Malignant neoplasm of glans penis                            | 0 | 0 | 0 | 0 | 0 | 0 | 0 | 0 | 0 | 0 | 0 | 0 | 2 | 0 | 0 | 0 | 0 | 0 |
| C60 | .2 | Malignant neoplasm of body of penis                          | 0 | 0 | 0 | 0 | 0 | 0 | 0 | 0 | 0 | 0 | 0 | 0 | 2 | 0 | 0 | 0 | 0 | 0 |
| C60 | .8 | Malignant neoplasm, overlapping lesion of penis              | 0 | 0 | 0 | 0 | 0 | 0 | 0 | 0 | 0 | 0 | 0 | 0 | 2 | 0 | 0 | 0 | 0 | 0 |
| C60 | .9 | Malignant neoplasm of penis, unspecified                     | 0 | 0 | 0 | 0 | 0 | 0 | 0 | 0 | 0 | 0 | 0 | 0 | 2 | 0 | 0 | 0 | 0 | 0 |
| C61 |    | Malignant neoplasm of prostate                               | 0 | 0 | 0 | 0 | 0 | 0 | 0 | 0 | 0 | 0 | 0 | 0 | 2 | 0 | 0 | 0 | 0 | 0 |
| C62 |    | Malignant neoplasm of testis                                 | 0 | 0 | 0 | 0 | 0 | 0 | 0 | 0 | 0 | 0 | 0 | 0 | 2 | 0 | 0 | 0 | 0 | 0 |
| C62 | .0 | Malignant neoplasm of undescended testis                     | 0 | 0 | 0 | 0 | 0 | 0 | 0 | 0 | 0 | 0 | 0 | 0 | 2 | 0 | 0 | 0 | 0 | 0 |

|     |    |                                                            |   |   |   |   |   |   |   |   |   |   |   |   |   |   |   |   |   |   |
|-----|----|------------------------------------------------------------|---|---|---|---|---|---|---|---|---|---|---|---|---|---|---|---|---|---|
| C62 | .1 | Malignant neoplasm of descended testis                     | 0 | 0 | 0 | 0 | 0 | 0 | 0 | 0 | 0 | 0 | 0 | 0 | 2 | 0 | 0 | 0 | 0 | 0 |
| C62 | .9 | Malignant neoplasm of testis, unspecified                  | 0 | 0 | 0 | 0 | 0 | 0 | 0 | 0 | 0 | 0 | 0 | 0 | 2 | 0 | 0 | 0 | 0 | 0 |
| C63 |    | Malignant neoplasm of other and unspec male genital organs | 0 | 0 | 0 | 0 | 0 | 0 | 0 | 0 | 0 | 0 | 0 | 0 | 2 | 0 | 0 | 0 | 0 | 0 |
| C63 | .0 | Malignant neoplasm of epididymis                           | 0 | 0 | 0 | 0 | 0 | 0 | 0 | 0 | 0 | 0 | 0 | 0 | 2 | 0 | 0 | 0 | 0 | 0 |
| C63 | .1 | Malignant neoplasm of spermatic cord                       | 0 | 0 | 0 | 0 | 0 | 0 | 0 | 0 | 0 | 0 | 0 | 0 | 2 | 0 | 0 | 0 | 0 | 0 |
| C63 | .2 | Malignant neoplasm of scrotum                              | 0 | 0 | 0 | 0 | 0 | 0 | 0 | 0 | 0 | 0 | 0 | 0 | 2 | 0 | 0 | 0 | 0 | 0 |
| C63 | .7 | Malignant neoplasm of other specified male genital orgs    | 0 | 0 | 0 | 0 | 0 | 0 | 0 | 0 | 0 | 0 | 0 | 0 | 2 | 0 | 0 | 0 | 0 | 0 |
| C63 | .8 | Malignant neoplasm, overlapping lesion male genital orgs   | 0 | 0 | 0 | 0 | 0 | 0 | 0 | 0 | 0 | 0 | 0 | 0 | 2 | 0 | 0 | 0 | 0 | 0 |
| C63 | .9 | Malignant neoplasm of male genital organ, unspecified      | 0 | 0 | 0 | 0 | 0 | 0 | 0 | 0 | 0 | 0 | 0 | 0 | 2 | 0 | 0 | 0 | 0 | 0 |
| C64 |    | Malignant neoplasm of kidney, except renal pelvis          | 0 | 0 | 0 | 0 | 0 | 0 | 0 | 0 | 0 | 0 | 0 | 0 | 2 | 0 | 0 | 0 | 0 | 0 |
| C65 |    | Malignant neoplasm of renal pelvis                         | 0 | 0 | 0 | 0 | 0 | 0 | 0 | 0 | 0 | 0 | 0 | 0 | 2 | 0 | 0 | 0 | 0 | 0 |
| C66 |    | Malignant neoplasm of ureter                               | 0 | 0 | 0 | 0 | 0 | 0 | 0 | 0 | 0 | 0 | 0 | 0 | 2 | 0 | 0 | 0 | 0 | 0 |
| C67 |    | Malignant neoplasm of bladder                              | 0 | 0 | 0 | 0 | 0 | 0 | 0 | 0 | 0 | 0 | 0 | 0 | 2 | 0 | 0 | 0 | 0 | 0 |
| C67 | .0 | Malignant neoplasm of trigone of bladder                   | 0 | 0 | 0 | 0 | 0 | 0 | 0 | 0 | 0 | 0 | 0 | 0 | 2 | 0 | 0 | 0 | 0 | 0 |
| C67 | .1 | Malignant neoplasm of dome of bladder                      | 0 | 0 | 0 | 0 | 0 | 0 | 0 | 0 | 0 | 0 | 0 | 0 | 2 | 0 | 0 | 0 | 0 | 0 |
| C67 | .2 | Malignant neoplasm of lateral wall of bladder              | 0 | 0 | 0 | 0 | 0 | 0 | 0 | 0 | 0 | 0 | 0 | 0 | 2 | 0 | 0 | 0 | 0 | 0 |
| C67 | .3 | Malignant neoplasm of anterior wall of bladder             | 0 | 0 | 0 | 0 | 0 | 0 | 0 | 0 | 0 | 0 | 0 | 0 | 2 | 0 | 0 | 0 | 0 | 0 |
| C67 | .4 | Malignant neoplasm of posterior wall of bladder            | 0 | 0 | 0 | 0 | 0 | 0 | 0 | 0 | 0 | 0 | 0 | 0 | 2 | 0 | 0 | 0 | 0 | 0 |
| C67 | .5 | Malignant neoplasm of bladder neck                         | 0 | 0 | 0 | 0 | 0 | 0 | 0 | 0 | 0 | 0 | 0 | 0 | 2 | 0 | 0 | 0 | 0 | 0 |
| C67 | .6 | Malignant neoplasm of ureteric orifice                     | 0 | 0 | 0 | 0 | 0 | 0 | 0 | 0 | 0 | 0 | 0 | 0 | 2 | 0 | 0 | 0 | 0 | 0 |
| C67 | .7 | Malignant neoplasm of urachus                              | 0 | 0 | 0 | 0 | 0 | 0 | 0 | 0 | 0 | 0 | 0 | 0 | 2 | 0 | 0 | 0 | 0 | 0 |
| C67 | .8 | Malignant neoplasm, overlapping lesion of bladder          | 0 | 0 | 0 | 0 | 0 | 0 | 0 | 0 | 0 | 0 | 0 | 0 | 2 | 0 | 0 | 0 | 0 | 0 |
| C67 | .9 | Malignant neoplasm of bladder, unspecified                 | 0 | 0 | 0 | 0 | 0 | 0 | 0 | 0 | 0 | 0 | 0 | 0 | 2 | 0 | 0 | 0 | 0 | 0 |
| C68 |    | Malignant neoplasm of other and unspecified urinary organs | 0 | 0 | 0 | 0 | 0 | 0 | 0 | 0 | 0 | 0 | 0 | 0 | 2 | 0 | 0 | 0 | 0 | 0 |

|     |                                                              |   |   |   |   |   |   |   |   |   |   |   |   |   |   |   |   |   |   |
|-----|--------------------------------------------------------------|---|---|---|---|---|---|---|---|---|---|---|---|---|---|---|---|---|---|
| C68 | .0 Malignant neoplasm of urethra                             | 0 | 0 | 0 | 0 | 0 | 0 | 0 | 0 | 0 | 0 | 0 | 0 | 2 | 0 | 0 | 0 | 0 | 0 |
| C68 | .1 Malignant neoplasm of paraurethral gland                  | 0 | 0 | 0 | 0 | 0 | 0 | 0 | 0 | 0 | 0 | 0 | 0 | 2 | 0 | 0 | 0 | 0 | 0 |
| C68 | .8 Malignant neoplasm of overlapping lesion urinary organs   | 0 | 0 | 0 | 0 | 0 | 0 | 0 | 0 | 0 | 0 | 0 | 0 | 2 | 0 | 0 | 0 | 0 | 0 |
| C68 | .9 Malignant neoplasm of urinary organ, unspecified          | 0 | 0 | 0 | 0 | 0 | 0 | 0 | 0 | 0 | 0 | 0 | 0 | 2 | 0 | 0 | 0 | 0 | 0 |
| C69 | Malignant neoplasm of eye and adnexa                         | 0 | 0 | 0 | 0 | 0 | 0 | 0 | 0 | 0 | 0 | 0 | 0 | 2 | 0 | 0 | 0 | 0 | 0 |
| C69 | .0 Malignant neoplasm of conjunctiva                         | 0 | 0 | 0 | 0 | 0 | 0 | 0 | 0 | 0 | 0 | 0 | 0 | 2 | 0 | 0 | 0 | 0 | 0 |
| C69 | .1 Malignant neoplasm of cornea                              | 0 | 0 | 0 | 0 | 0 | 0 | 0 | 0 | 0 | 0 | 0 | 0 | 2 | 0 | 0 | 0 | 0 | 0 |
| C69 | .2 Malignant neoplasm of retina                              | 0 | 0 | 0 | 0 | 0 | 0 | 0 | 0 | 0 | 0 | 0 | 0 | 2 | 0 | 0 | 0 | 0 | 0 |
| C69 | .3 Malignant neoplasm of choroid                             | 0 | 0 | 0 | 0 | 0 | 0 | 0 | 0 | 0 | 0 | 0 | 0 | 2 | 0 | 0 | 0 | 0 | 0 |
| C69 | .4 Malignant neoplasm of ciliary body                        | 0 | 0 | 0 | 0 | 0 | 0 | 0 | 0 | 0 | 0 | 0 | 0 | 2 | 0 | 0 | 0 | 0 | 0 |
| C69 | .5 Malignant neoplasm of lacrimal gland and duct             | 0 | 0 | 0 | 0 | 0 | 0 | 0 | 0 | 0 | 0 | 0 | 0 | 2 | 0 | 0 | 0 | 0 | 0 |
| C69 | .6 Malignant neoplasm of orbit                               | 0 | 0 | 0 | 0 | 0 | 0 | 0 | 0 | 0 | 0 | 0 | 0 | 2 | 0 | 0 | 0 | 0 | 0 |
| C69 | .8 Malignant neoplasm, overlapping lesion eye and adnexa     | 0 | 0 | 0 | 0 | 0 | 0 | 0 | 0 | 0 | 0 | 0 | 0 | 2 | 0 | 0 | 0 | 0 | 0 |
| C69 | .9 Malignant neoplasm of eye, unspecified                    | 0 | 0 | 0 | 0 | 0 | 0 | 0 | 0 | 0 | 0 | 0 | 0 | 2 | 0 | 0 | 0 | 0 | 0 |
| C70 | Malignant neoplasm of meninges                               | 0 | 0 | 0 | 0 | 0 | 0 | 0 | 0 | 0 | 0 | 0 | 0 | 2 | 0 | 0 | 0 | 0 | 0 |
| C70 | .0 Malignant neoplasm of, cerebral meninges                  | 0 | 0 | 0 | 0 | 0 | 0 | 0 | 0 | 0 | 0 | 0 | 0 | 2 | 0 | 0 | 0 | 0 | 0 |
| C70 | .1 Malignant neoplasm of spinal meninges                     | 0 | 0 | 0 | 0 | 0 | 0 | 0 | 0 | 0 | 0 | 0 | 0 | 2 | 0 | 0 | 0 | 0 | 0 |
| C70 | .9 Malignant neoplasm of meninges, unspecified               | 0 | 0 | 0 | 0 | 0 | 0 | 0 | 0 | 0 | 0 | 0 | 0 | 2 | 0 | 0 | 0 | 0 | 0 |
| C71 | Malignant neoplasm of brain                                  | 0 | 0 | 0 | 0 | 0 | 0 | 0 | 0 | 0 | 0 | 0 | 0 | 2 | 0 | 0 | 0 | 0 | 0 |
| C71 | .0 Malignant neoplasm of cerebrum, except lobes & ventricles | 0 | 0 | 0 | 0 | 0 | 0 | 0 | 0 | 0 | 0 | 0 | 0 | 2 | 0 | 0 | 0 | 0 | 0 |
| C71 | .1 Malignant neoplasm of cerebrum, frontal lobe              | 0 | 0 | 0 | 0 | 0 | 0 | 0 | 0 | 0 | 0 | 0 | 0 | 2 | 0 | 0 | 0 | 0 | 0 |
| C71 | .2 Malignant neoplasm of cerebrum, temporal lobe             | 0 | 0 | 0 | 0 | 0 | 0 | 0 | 0 | 0 | 0 | 0 | 0 | 2 | 0 | 0 | 0 | 0 | 0 |
| C71 | .3 Malignant neoplasm of cerebrum, parietal lobe             | 0 | 0 | 0 | 0 | 0 | 0 | 0 | 0 | 0 | 0 | 0 | 0 | 2 | 0 | 0 | 0 | 0 | 0 |
| C71 | .4 Malignant neoplasm of cerebrum, occipital lobe            | 0 | 0 | 0 | 0 | 0 | 0 | 0 | 0 | 0 | 0 | 0 | 0 | 2 | 0 | 0 | 0 | 0 | 0 |

|     |                                                             |   |   |   |   |   |   |   |   |   |   |   |   |   |   |   |   |   |   |
|-----|-------------------------------------------------------------|---|---|---|---|---|---|---|---|---|---|---|---|---|---|---|---|---|---|
| C71 | Malignant neoplasm of cerebrum, cerebral ventricle          | 0 | 0 | 0 | 0 | 0 | 0 | 0 | 0 | 0 | 0 | 0 | 0 | 2 | 0 | 0 | 0 | 0 | 0 |
| C71 | Malignant neoplasm of cerebrum, cerebellum                  | 0 | 0 | 0 | 0 | 0 | 0 | 0 | 0 | 0 | 0 | 0 | 0 | 2 | 0 | 0 | 0 | 0 | 0 |
| C71 | Malignant neoplasm of cerebrum, brain stem                  | 0 | 0 | 0 | 0 | 0 | 0 | 0 | 0 | 0 | 0 | 0 | 0 | 2 | 0 | 0 | 0 | 0 | 0 |
| C71 | Malignant neoplasm of cerebrum, overlapping lesion of brain | 0 | 0 | 0 | 0 | 0 | 0 | 0 | 0 | 0 | 0 | 0 | 0 | 2 | 0 | 0 | 0 | 0 | 0 |
| C71 | Malignant neoplasm of cerebrum, brain, unspecified          | 0 | 0 | 0 | 0 | 0 | 0 | 0 | 0 | 0 | 0 | 0 | 0 | 2 | 0 | 0 | 0 | 0 | 0 |
| C72 | Malig neopl spinal cord, cranial nerves & oth parts of CNS  | 0 | 0 | 0 | 0 | 0 | 0 | 0 | 0 | 0 | 0 | 0 | 0 | 2 | 0 | 0 | 0 | 0 | 0 |
| C72 | Malignant neoplasm of spinal cord                           | 0 | 0 | 0 | 0 | 0 | 0 | 0 | 0 | 0 | 0 | 0 | 0 | 2 | 0 | 0 | 0 | 0 | 0 |
| C72 | Malignant neoplasm of cauda equina                          | 0 | 0 | 0 | 0 | 0 | 0 | 0 | 0 | 0 | 0 | 0 | 0 | 2 | 0 | 0 | 0 | 0 | 0 |
| C72 | Malignant neoplasm of Olfactory nerve                       | 0 | 0 | 0 | 0 | 0 | 0 | 0 | 0 | 0 | 0 | 0 | 0 | 2 | 0 | 0 | 0 | 0 | 0 |
| C72 | Malignant neoplasm of Optic nerve                           | 0 | 0 | 0 | 0 | 0 | 0 | 0 | 0 | 0 | 0 | 0 | 0 | 2 | 0 | 0 | 0 | 0 | 0 |
| C72 | Malignant neoplasm of Acoustic nerve                        | 0 | 0 | 0 | 0 | 0 | 0 | 0 | 0 | 0 | 0 | 0 | 0 | 2 | 0 | 0 | 0 | 0 | 0 |
| C72 | Malignant neoplasm of other and unspecified cranial nerves  | 0 | 0 | 0 | 0 | 0 | 0 | 0 | 0 | 0 | 0 | 0 | 0 | 2 | 0 | 0 | 0 | 0 | 0 |
| C72 | Malignant neoplasm, overlapping lesion brain&other part CNS | 0 | 0 | 0 | 0 | 0 | 0 | 0 | 0 | 0 | 0 | 0 | 0 | 2 | 0 | 0 | 0 | 0 | 0 |
| C72 | Malignant neoplasm of Central Nervous System, unspecified   | 0 | 0 | 0 | 0 | 0 | 0 | 0 | 0 | 0 | 0 | 0 | 0 | 2 | 0 | 0 | 0 | 0 | 0 |
| C73 | Malignant neoplasm of thyroid gland                         | 0 | 0 | 0 | 0 | 0 | 0 | 0 | 0 | 0 | 0 | 0 | 0 | 2 | 0 | 0 | 0 | 0 | 0 |
| C74 | Malignant neoplasm of adrenal gland                         | 0 | 0 | 0 | 0 | 0 | 0 | 0 | 0 | 0 | 0 | 0 | 0 | 2 | 0 | 0 | 0 | 0 | 0 |
| C74 | Malignant neoplasm of cortex of adrenal gland               | 0 | 0 | 0 | 0 | 0 | 0 | 0 | 0 | 0 | 0 | 0 | 0 | 2 | 0 | 0 | 0 | 0 | 0 |
| C74 | Malignant neoplasm of medulla of adrenal gland              | 0 | 0 | 0 | 0 | 0 | 0 | 0 | 0 | 0 | 0 | 0 | 0 | 2 | 0 | 0 | 0 | 0 | 0 |
| C74 | Malignant neoplasm of adrenal gland, unsp                   | 0 | 0 | 0 | 0 | 0 | 0 | 0 | 0 | 0 | 0 | 0 | 0 | 2 | 0 | 0 | 0 | 0 | 0 |
| C75 | Malignant neo other endocrine glands and related structures | 0 | 0 | 0 | 0 | 0 | 0 | 0 | 0 | 0 | 0 | 0 | 0 | 2 | 0 | 0 | 0 | 0 | 0 |
| C75 | Malignant neoplasm of parathyroid gland                     | 0 | 0 | 0 | 0 | 0 | 0 | 0 | 0 | 0 | 0 | 0 | 0 | 2 | 0 | 0 | 0 | 0 | 0 |
| C75 | Malignant neoplasm of pituitary gland                       | 0 | 0 | 0 | 0 | 0 | 0 | 0 | 0 | 0 | 0 | 0 | 0 | 2 | 0 | 0 | 0 | 0 | 0 |
| C75 | Malignant neoplasm of craniopharyngeal duct                 | 0 | 0 | 0 | 0 | 0 | 0 | 0 | 0 | 0 | 0 | 0 | 0 | 2 | 0 | 0 | 0 | 0 | 0 |
| C75 | Malignant neoplasm of pineal gland                          | 0 | 0 | 0 | 0 | 0 | 0 | 0 | 0 | 0 | 0 | 0 | 0 | 2 | 0 | 0 | 0 | 0 | 0 |

|     |                                                                |   |   |   |   |   |   |   |   |   |   |   |   |   |   |   |   |   |   |
|-----|----------------------------------------------------------------|---|---|---|---|---|---|---|---|---|---|---|---|---|---|---|---|---|---|
| C75 | .4 Malignant neoplasm of carotid body                          | 0 | 0 | 0 | 0 | 0 | 0 | 0 | 0 | 0 | 0 | 0 | 0 | 2 | 0 | 0 | 0 | 0 | 0 |
| C75 | .5 Malignant neoplasm of aortic body and other paraganglia     | 0 | 0 | 0 | 0 | 0 | 0 | 0 | 0 | 0 | 0 | 0 | 0 | 2 | 0 | 0 | 0 | 0 | 0 |
| C75 | .8 Malignant neoplasm, pluriglandular involvement, unspecified | 0 | 0 | 0 | 0 | 0 | 0 | 0 | 0 | 0 | 0 | 0 | 0 | 2 | 0 | 0 | 0 | 0 | 0 |
| C75 | .9 Malignant neoplasm of endocrine gland, unspecified          | 0 | 0 | 0 | 0 | 0 | 0 | 0 | 0 | 0 | 0 | 0 | 0 | 2 | 0 | 0 | 0 | 0 | 0 |
| C76 | Malignant neoplasm of other and ill-defined sites              | 0 | 0 | 0 | 0 | 0 | 0 | 0 | 0 | 0 | 0 | 0 | 0 | 2 | 0 | 0 | 0 | 0 | 0 |
| C76 | .0 Malignant neoplasm of head, face & neck                     | 0 | 0 | 0 | 0 | 0 | 0 | 0 | 0 | 0 | 0 | 0 | 0 | 2 | 0 | 0 | 0 | 0 | 0 |
| C76 | .1 Malignant neoplasm of thorax                                | 0 | 0 | 0 | 0 | 0 | 0 | 0 | 0 | 0 | 0 | 0 | 0 | 2 | 0 | 0 | 0 | 0 | 0 |
| C76 | .2 Malignant neoplasm of abdomen                               | 0 | 0 | 0 | 0 | 0 | 0 | 0 | 0 | 0 | 0 | 0 | 0 | 2 | 0 | 0 | 0 | 0 | 0 |
| C76 | .3 Malignant neoplasm of pelvis                                | 0 | 0 | 0 | 0 | 0 | 0 | 0 | 0 | 0 | 0 | 0 | 0 | 2 | 0 | 0 | 0 | 0 | 0 |
| C76 | 4 Malignant neoplasm of upper limb                             | 0 | 0 | 0 | 0 | 0 | 0 | 0 | 0 | 0 | 0 | 0 | 0 | 2 | 0 | 0 | 0 | 0 | 0 |
| C76 | 5 Malignant neoplasm of lower limb                             | 0 | 0 | 0 | 0 | 0 | 0 | 0 | 0 | 0 | 0 | 0 | 0 | 2 | 0 | 0 | 0 | 0 | 0 |
| C76 | .7 Malignant neoplasm of other ill-defined sites               | 0 | 0 | 0 | 0 | 0 | 0 | 0 | 0 | 0 | 0 | 0 | 0 | 2 | 0 | 0 | 0 | 0 | 0 |
| C76 | .8 Malignant neoplasm, overlap lesion oth & ill-defined sites  | 0 | 0 | 0 | 0 | 0 | 0 | 0 | 0 | 0 | 0 | 0 | 0 | 2 | 0 | 0 | 0 | 0 | 0 |
| C91 | Lymphoid leukaemia                                             | 0 | 0 | 0 | 0 | 0 | 0 | 0 | 0 | 0 | 0 | 0 | 0 | 0 | 2 | 0 | 0 | 0 | 0 |
| C91 | .0 Acute lymphoblastic leukaemia                               | 0 | 0 | 0 | 0 | 0 | 0 | 0 | 0 | 0 | 0 | 0 | 0 | 0 | 2 | 0 | 0 | 0 | 0 |
| C91 | .1 Chronic lymphocytic leukaemia                               | 0 | 0 | 0 | 0 | 0 | 0 | 0 | 0 | 0 | 0 | 0 | 0 | 0 | 2 | 0 | 0 | 0 | 0 |
| C91 | .2 Subacute lymphocytic leukaemia                              | 0 | 0 | 0 | 0 | 0 | 0 | 0 | 0 | 0 | 0 | 0 | 0 | 0 | 2 | 0 | 0 | 0 | 0 |
| C91 | .3 Prolymphocytic leukaemia                                    | 0 | 0 | 0 | 0 | 0 | 0 | 0 | 0 | 0 | 0 | 0 | 0 | 0 | 2 | 0 | 0 | 0 | 0 |
| C91 | .4 Hairy-cell leukaemia                                        | 0 | 0 | 0 | 0 | 0 | 0 | 0 | 0 | 0 | 0 | 0 | 0 | 0 | 2 | 0 | 0 | 0 | 0 |
| C91 | .5 Adult T-cell leukaemia                                      | 0 | 0 | 0 | 0 | 0 | 0 | 0 | 0 | 0 | 0 | 0 | 0 | 0 | 2 | 0 | 0 | 0 | 0 |
| C91 | .7 Other lymphoid leukaemia                                    | 0 | 0 | 0 | 0 | 0 | 0 | 0 | 0 | 0 | 0 | 0 | 0 | 0 | 2 | 0 | 0 | 0 | 0 |
| C91 | .9 Lymphoid leukaemia, unspecified                             | 0 | 0 | 0 | 0 | 0 | 0 | 0 | 0 | 0 | 0 | 0 | 0 | 0 | 2 | 0 | 0 | 0 | 0 |
| C92 | Myeloid leukaemia                                              | 0 | 0 | 0 | 0 | 0 | 0 | 0 | 0 | 0 | 0 | 0 | 0 | 0 | 2 | 0 | 0 | 0 | 0 |
| C92 | .0 Acute myeloid leukaemia                                     | 0 | 0 | 0 | 0 | 0 | 0 | 0 | 0 | 0 | 0 | 0 | 0 | 0 | 2 | 0 | 0 | 0 | 0 |



|     |    |                                         |   |   |   |   |   |   |   |   |   |   |   |   |   |   |   |   |   |   |
|-----|----|-----------------------------------------|---|---|---|---|---|---|---|---|---|---|---|---|---|---|---|---|---|---|
| C92 | .1 | Chronic myeloid leukaemia               | 0 | 0 | 0 | 0 | 0 | 0 | 0 | 0 | 0 | 0 | 0 | 0 | 0 | 2 | 0 | 0 | 0 | 0 |
| C92 | .2 | Subacute myeloid leukaemia              | 0 | 0 | 0 | 0 | 0 | 0 | 0 | 0 | 0 | 0 | 0 | 0 | 0 | 2 | 0 | 0 | 0 | 0 |
| C92 | .3 | Myeloid sarcoma                         | 0 | 0 | 0 | 0 | 0 | 0 | 0 | 0 | 0 | 0 | 0 | 0 | 0 | 2 | 0 | 0 | 0 | 0 |
| C92 | .4 | Acute promyelocytic leukaemia           | 0 | 0 | 0 | 0 | 0 | 0 | 0 | 0 | 0 | 0 | 0 | 0 | 0 | 2 | 0 | 0 | 0 | 0 |
| C92 | .5 | Acute myelomonocytic leukaemia          | 0 | 0 | 0 | 0 | 0 | 0 | 0 | 0 | 0 | 0 | 0 | 0 | 0 | 2 | 0 | 0 | 0 | 0 |
| C92 | .7 | Other myeloid leukaemia                 | 0 | 0 | 0 | 0 | 0 | 0 | 0 | 0 | 0 | 0 | 0 | 0 | 0 | 2 | 0 | 0 | 0 | 0 |
| C92 | .9 | Myeloid leukaemia, unspecified          | 0 | 0 | 0 | 0 | 0 | 0 | 0 | 0 | 0 | 0 | 0 | 0 | 0 | 2 | 0 | 0 | 0 | 0 |
| C93 |    | Monocytic leukaemia                     | 0 | 0 | 0 | 0 | 0 | 0 | 0 | 0 | 0 | 0 | 0 | 0 | 0 | 2 | 0 | 0 | 0 | 0 |
| C93 | .0 | Acute monocytic leukaemia               | 0 | 0 | 0 | 0 | 0 | 0 | 0 | 0 | 0 | 0 | 0 | 0 | 0 | 2 | 0 | 0 | 0 | 0 |
| C93 | .1 | Chronic monocytic leukaemia             | 0 | 0 | 0 | 0 | 0 | 0 | 0 | 0 | 0 | 0 | 0 | 0 | 0 | 2 | 0 | 0 | 0 | 0 |
| C93 | .2 | Subacute monocytic leukaemia            | 0 | 0 | 0 | 0 | 0 | 0 | 0 | 0 | 0 | 0 | 0 | 0 | 0 | 2 | 0 | 0 | 0 | 0 |
| C93 | .7 | Other monocytic leukaemia               | 0 | 0 | 0 | 0 | 0 | 0 | 0 | 0 | 0 | 0 | 0 | 0 | 0 | 2 | 0 | 0 | 0 | 0 |
| C93 | .9 | Monocytic leukaemia, unspecified        | 0 | 0 | 0 | 0 | 0 | 0 | 0 | 0 | 0 | 0 | 0 | 0 | 0 | 2 | 0 | 0 | 0 | 0 |
| C94 |    | Other leukaemias of specified cell type | 0 | 0 | 0 | 0 | 0 | 0 | 0 | 0 | 0 | 0 | 0 | 0 | 0 | 2 | 0 | 0 | 0 | 0 |
| C94 | .0 | Acute erythraemia & erythroleukaemia    | 0 | 0 | 0 | 0 | 0 | 0 | 0 | 0 | 0 | 0 | 0 | 0 | 0 | 2 | 0 | 0 | 0 | 0 |
| C94 | .1 | Chronic erythraemia                     | 0 | 0 | 0 | 0 | 0 | 0 | 0 | 0 | 0 | 0 | 0 | 0 | 0 | 2 | 0 | 0 | 0 | 0 |
| C94 | .2 | Acute megakaryoblastic leukaemia        | 0 | 0 | 0 | 0 | 0 | 0 | 0 | 0 | 0 | 0 | 0 | 0 | 0 | 2 | 0 | 0 | 0 | 0 |
| C94 | .3 | Mast cell leukaemia                     | 0 | 0 | 0 | 0 | 0 | 0 | 0 | 0 | 0 | 0 | 0 | 0 | 0 | 2 | 0 | 0 | 0 | 0 |
| C94 | .4 | Acute panmyelosis                       | 0 | 0 | 0 | 0 | 0 | 0 | 0 | 0 | 0 | 0 | 0 | 0 | 0 | 2 | 0 | 0 | 0 | 0 |
| C94 | .5 | Acute myelofibrosis                     | 0 | 0 | 0 | 0 | 0 | 0 | 0 | 0 | 0 | 0 | 0 | 0 | 0 | 2 | 0 | 0 | 0 | 0 |
| C94 | .7 | Other specified leukaemias              | 0 | 0 | 0 | 0 | 0 | 0 | 0 | 0 | 0 | 0 | 0 | 0 | 0 | 2 | 0 | 0 | 0 | 0 |
| C95 |    | Leukaemia of unspecified cell type      | 0 | 0 | 0 | 0 | 0 | 0 | 0 | 0 | 0 | 0 | 0 | 0 | 0 | 2 | 0 | 0 | 0 | 0 |
| C95 | .0 | Acute leukaemia of unsp cell type       | 0 | 0 | 0 | 0 | 0 | 0 | 0 | 0 | 0 | 0 | 0 | 0 | 0 | 2 | 0 | 0 | 0 | 0 |
| C95 | .1 | Chronic leukaemia unsp cell type        | 0 | 0 | 0 | 0 | 0 | 0 | 0 | 0 | 0 | 0 | 0 | 0 | 0 | 2 | 0 | 0 | 0 | 0 |

|     |                                                                |   |   |   |   |   |   |   |   |   |   |   |   |   |   |   |   |   |   |
|-----|----------------------------------------------------------------|---|---|---|---|---|---|---|---|---|---|---|---|---|---|---|---|---|---|
| C95 | .2 Subacute leukaemia unsp cell type                           | 0 | 0 | 0 | 0 | 0 | 0 | 0 | 0 | 0 | 0 | 0 | 0 | 0 | 2 | 0 | 0 | 0 | 0 |
| C95 | .7 Other leukaemia unspecified cell type                       | 0 | 0 | 0 | 0 | 0 | 0 | 0 | 0 | 0 | 0 | 0 | 0 | 0 | 2 | 0 | 0 | 0 | 0 |
| C95 | .9 Leukaemia, unspecified                                      | 0 | 0 | 0 | 0 | 0 | 0 | 0 | 0 | 0 | 0 | 0 | 0 | 0 | 2 | 0 | 0 | 0 | 0 |
| C81 | Hodgkin's disease                                              | 0 | 0 | 0 | 0 | 0 | 0 | 0 | 0 | 0 | 0 | 0 | 0 | 0 | 0 | 2 | 0 | 0 | 0 |
| C81 | .0 Hodgkin's disease, lymphocytic predominance                 | 0 | 0 | 0 | 0 | 0 | 0 | 0 | 0 | 0 | 0 | 0 | 0 | 0 | 0 | 2 | 0 | 0 | 0 |
| C81 | .1 Hodgkin's disease, nodular sclerosis                        | 0 | 0 | 0 | 0 | 0 | 0 | 0 | 0 | 0 | 0 | 0 | 0 | 0 | 0 | 2 | 0 | 0 | 0 |
| C81 | .2 Hodgkin's disease, mixed cellularity                        | 0 | 0 | 0 | 0 | 0 | 0 | 0 | 0 | 0 | 0 | 0 | 0 | 0 | 0 | 2 | 0 | 0 | 0 |
| C81 | .3 Hodgkin's disease, lymphocytic depletion                    | 0 | 0 | 0 | 0 | 0 | 0 | 0 | 0 | 0 | 0 | 0 | 0 | 0 | 0 | 2 | 0 | 0 | 0 |
| C81 | .7 Hodgkin's disease, other Hodgkin's disease                  | 0 | 0 | 0 | 0 | 0 | 0 | 0 | 0 | 0 | 0 | 0 | 0 | 0 | 0 | 2 | 0 | 0 | 0 |
| C81 | .9 Hodgkin's disease, Hodgkin's disease, unspecified           | 0 | 0 | 0 | 0 | 0 | 0 | 0 | 0 | 0 | 0 | 0 | 0 | 0 | 0 | 2 | 0 | 0 | 0 |
| C82 | Follicular [nodular] non-Hodgkin's lymphoma                    | 0 | 0 | 0 | 0 | 0 | 0 | 0 | 0 | 0 | 0 | 0 | 0 | 0 | 0 | 2 | 0 | 0 | 0 |
| C82 | .0 Follicular non-Hodgkin's small cleaved cell lymphoma        | 0 | 0 | 0 | 0 | 0 | 0 | 0 | 0 | 0 | 0 | 0 | 0 | 0 | 0 | 2 | 0 | 0 | 0 |
| C82 | .1 Follicular non-Hodg mixed sml cleavd & lge cell lymphoma    | 0 | 0 | 0 | 0 | 0 | 0 | 0 | 0 | 0 | 0 | 0 | 0 | 0 | 0 | 2 | 0 | 0 | 0 |
| C82 | .2 Follicular non-Hodgkin's large cell lymphoma                | 0 | 0 | 0 | 0 | 0 | 0 | 0 | 0 | 0 | 0 | 0 | 0 | 0 | 0 | 2 | 0 | 0 | 0 |
| C82 | .7 Follicular non-Hodgkin's other types of lymphoma            | 0 | 0 | 0 | 0 | 0 | 0 | 0 | 0 | 0 | 0 | 0 | 0 | 0 | 0 | 2 | 0 | 0 | 0 |
| C82 | .9 Follicular non-Hodgkin's unspecified lymphoma               | 0 | 0 | 0 | 0 | 0 | 0 | 0 | 0 | 0 | 0 | 0 | 0 | 0 | 0 | 2 | 0 | 0 | 0 |
| C83 | Diffuse non-Hodgkin's lymphoma                                 | 0 | 0 | 0 | 0 | 0 | 0 | 0 | 0 | 0 | 0 | 0 | 0 | 0 | 0 | 2 | 0 | 0 | 0 |
| C83 | .0 Diffuse non-Hodgkin's small cell (diffuse)lymphoma          | 0 | 0 | 0 | 0 | 0 | 0 | 0 | 0 | 0 | 0 | 0 | 0 | 0 | 0 | 2 | 0 | 0 | 0 |
| C83 | .1 Diffuse non-Hodgkin's small cleaved cell (diffuse) lymphoma | 0 | 0 | 0 | 0 | 0 | 0 | 0 | 0 | 0 | 0 | 0 | 0 | 0 | 0 | 2 | 0 | 0 | 0 |
| C83 | .2 Diffuse non-Hodgkin mixed sml & lge cell (diffuse) lymphoma | 0 | 0 | 0 | 0 | 0 | 0 | 0 | 0 | 0 | 0 | 0 | 0 | 0 | 0 | 2 | 0 | 0 | 0 |
| C83 | .3 Diffuse non-Hodgkin's large cell (diffuse) lymphoma         | 0 | 0 | 0 | 0 | 0 | 0 | 0 | 0 | 0 | 0 | 0 | 0 | 0 | 0 | 2 | 0 | 0 | 0 |
| C83 | .4 Diffuse non-Hodgkin's immunoblastic (diffuse) lymphoma      | 0 | 0 | 0 | 0 | 0 | 0 | 0 | 0 | 0 | 0 | 0 | 0 | 0 | 0 | 2 | 0 | 0 | 0 |
| C83 | .5 Diffuse non-Hodgkin's lymphoblastic (diffuse) lymphoma      | 0 | 0 | 0 | 0 | 0 | 0 | 0 | 0 | 0 | 0 | 0 | 0 | 0 | 0 | 2 | 0 | 0 | 0 |
| C83 | .6 Diffuse non-Hodgkin's lymphoma undifferentiated (diffuse)   | 0 | 0 | 0 | 0 | 0 | 0 | 0 | 0 | 0 | 0 | 0 | 0 | 0 | 0 | 2 | 0 | 0 | 0 |

|     |                                                              |   |   |   |   |   |   |   |   |   |   |   |   |   |   |   |   |   |   |
|-----|--------------------------------------------------------------|---|---|---|---|---|---|---|---|---|---|---|---|---|---|---|---|---|---|
| C83 | Diffuse non-Hodgkin's lymphoma, Burkitt's tumour             | 0 | 0 | 0 | 0 | 0 | 0 | 0 | 0 | 0 | 0 | 0 | 0 | 0 | 0 | 2 | 0 | 0 | 0 |
| C83 | Other types of diffuse non-Hodgkin's lymphoma                | 0 | 0 | 0 | 0 | 0 | 0 | 0 | 0 | 0 | 0 | 0 | 0 | 0 | 0 | 2 | 0 | 0 | 0 |
| C83 | Diffuse non-Hodgkin's lymphoma, unspecified                  | 0 | 0 | 0 | 0 | 0 | 0 | 0 | 0 | 0 | 0 | 0 | 0 | 0 | 0 | 2 | 0 | 0 | 0 |
| C84 | Peripheral and cutaneous T-cell lymphomas                    | 0 | 0 | 0 | 0 | 0 | 0 | 0 | 0 | 0 | 0 | 0 | 0 | 0 | 0 | 2 | 0 | 0 | 0 |
| C84 | Peripheral and cutaneous T-cell lymphomas, mycosis fungoides | 0 | 0 | 0 | 0 | 0 | 0 | 0 | 0 | 0 | 0 | 0 | 0 | 0 | 0 | 2 | 0 | 0 | 0 |
| C84 | Peripheral and cutaneous T-cell lymphomas, Sezary's disease  | 0 | 0 | 0 | 0 | 0 | 0 | 0 | 0 | 0 | 0 | 0 | 0 | 0 | 0 | 2 | 0 | 0 | 0 |
| C84 | Peripheral and cutaneous T-cell lymphomas, T-zone lymphoma   | 0 | 0 | 0 | 0 | 0 | 0 | 0 | 0 | 0 | 0 | 0 | 0 | 0 | 0 | 2 | 0 | 0 | 0 |
| C84 | Periph & cutan T-cell lymphomas, lymphoepithelioid lymphoma  | 0 | 0 | 0 | 0 | 0 | 0 | 0 | 0 | 0 | 0 | 0 | 0 | 0 | 0 | 2 | 0 | 0 | 0 |
| C84 | Periph & cutan T-cell lymphomas, peripheral T-cell lymphoma  | 0 | 0 | 0 | 0 | 0 | 0 | 0 | 0 | 0 | 0 | 0 | 0 | 0 | 0 | 2 | 0 | 0 | 0 |
| C84 | Periph & cutan T-cell lymphomas, oth & unsp T-cell lymphomas | 0 | 0 | 0 | 0 | 0 | 0 | 0 | 0 | 0 | 0 | 0 | 0 | 0 | 0 | 2 | 0 | 0 | 0 |
| C85 | Other and unspecified types of non-Hodgkin's lymphoma        | 0 | 0 | 0 | 0 | 0 | 0 | 0 | 0 | 0 | 0 | 0 | 0 | 0 | 0 | 2 | 0 | 0 | 0 |
| C85 | Oth & unspec types of non-Hodgkin's lymphoma, lymphosarcoma  | 0 | 0 | 0 | 0 | 0 | 0 | 0 | 0 | 0 | 0 | 0 | 0 | 0 | 0 | 2 | 0 | 0 | 0 |
| C85 | Oth & unsp types non-Hodgkin's B-cell lymphoma, unsp         | 0 | 0 | 0 | 0 | 0 | 0 | 0 | 0 | 0 | 0 | 0 | 0 | 0 | 0 | 2 | 0 | 0 | 0 |
| C85 | Oth specified types of non-Hodgkin's lymphoma                | 0 | 0 | 0 | 0 | 0 | 0 | 0 | 0 | 0 | 0 | 0 | 0 | 0 | 0 | 2 | 0 | 0 | 0 |
| C85 | Non-Hodgkin's lymphoma, unspecified type                     | 0 | 0 | 0 | 0 | 0 | 0 | 0 | 0 | 0 | 0 | 0 | 0 | 0 | 0 | 2 | 0 | 0 | 0 |
| C88 | Malignant immunoproliferative diseases                       | 0 | 0 | 0 | 0 | 0 | 0 | 0 | 0 | 0 | 0 | 0 | 0 | 0 | 0 | 2 | 0 | 0 | 0 |
| C88 | .0 Waldenstrom's macroglobulinaemia                          | 0 | 0 | 0 | 0 | 0 | 0 | 0 | 0 | 0 | 0 | 0 | 0 | 0 | 0 | 2 | 0 | 0 | 0 |
| C88 | .1 Alpha heavy chain disease                                 | 0 | 0 | 0 | 0 | 0 | 0 | 0 | 0 | 0 | 0 | 0 | 0 | 0 | 0 | 2 | 0 | 0 | 0 |
| C88 | .2 Gamma heavy chain disease                                 | 0 | 0 | 0 | 0 | 0 | 0 | 0 | 0 | 0 | 0 | 0 | 0 | 0 | 0 | 2 | 0 | 0 | 0 |
| C88 | Malignant immunoproliferative small intestinal disease       | 0 | 0 | 0 | 0 | 0 | 0 | 0 | 0 | 0 | 0 | 0 | 0 | 0 | 0 | 2 | 0 | 0 | 0 |
| C88 | Other malignant immunoproliferative diseases                 | 0 | 0 | 0 | 0 | 0 | 0 | 0 | 0 | 0 | 0 | 0 | 0 | 0 | 0 | 2 | 0 | 0 | 0 |
| C88 | Malignant immunoproliferative disease, unspecified           | 0 | 0 | 0 | 0 | 0 | 0 | 0 | 0 | 0 | 0 | 0 | 0 | 0 | 0 | 2 | 0 | 0 | 0 |
| C96 | Oth & unspec malig neop lymphoid, haematopoietic & rel tiss  | 0 | 0 | 0 | 0 | 0 | 0 | 0 | 0 | 0 | 0 | 0 | 0 | 0 | 0 | 2 | 0 | 0 | 0 |
| C96 | .0 Letterer-Siwe disease                                     | 0 | 0 | 0 | 0 | 0 | 0 | 0 | 0 | 0 | 0 | 0 | 0 | 0 | 0 | 2 | 0 | 0 | 0 |







|           |                                                          |   |   |   |   |   |   |   |   |   |   |   |   |   |   |   |   |   |   |
|-----------|----------------------------------------------------------|---|---|---|---|---|---|---|---|---|---|---|---|---|---|---|---|---|---|
| B22<br>.2 | HIV disease resulting in wasting syndrome                | 0 | 0 | 0 | 0 | 0 | 0 | 0 | 0 | 0 | 0 | 0 | 0 | 0 | 0 | 0 | 0 | 0 | 6 |
| B22<br>.7 | HIV dis resulting in multiple diseases classif elsewhere | 0 | 0 | 0 | 0 | 0 | 0 | 0 | 0 | 0 | 0 | 0 | 0 | 0 | 0 | 0 | 0 | 0 | 6 |
| B23       | Human immunodef virus dis resulting in other conditions  | 0 | 0 | 0 | 0 | 0 | 0 | 0 | 0 | 0 | 0 | 0 | 0 | 0 | 0 | 0 | 0 | 0 | 6 |
| B23<br>.0 | Acute HIV infection syndrome                             | 0 | 0 | 0 | 0 | 0 | 0 | 0 | 0 | 0 | 0 | 0 | 0 | 0 | 0 | 0 | 0 | 0 | 6 |
| B23<br>.1 | HIV dis result (persistent) generalized lymphadenopathy  | 0 | 0 | 0 | 0 | 0 | 0 | 0 | 0 | 0 | 0 | 0 | 0 | 0 | 0 | 0 | 0 | 0 | 6 |
| B23<br>.2 | HIV dis result haematologic / immunologic abnorm NEC     | 0 | 0 | 0 | 0 | 0 | 0 | 0 | 0 | 0 | 0 | 0 | 0 | 0 | 0 | 0 | 0 | 0 | 6 |
| B23<br>.8 | HIV disease resulting in other specified conditions      | 0 | 0 | 0 | 0 | 0 | 0 | 0 | 0 | 0 | 0 | 0 | 0 | 0 | 0 | 0 | 0 | 0 | 6 |
| B24       | Unspecified human immunodeficiency virus [HIV] disease   | 0 | 0 | 0 | 0 | 0 | 0 | 0 | 0 | 0 | 0 | 0 | 0 | 0 | 0 | 0 | 0 | 0 | 6 |
| F02<br>.4 | Dementia in human immunodef virus [HIV] disease          | 0 | 0 | 0 | 0 | 0 | 0 | 0 | 0 | 0 | 0 | 0 | 0 | 0 | 0 | 0 | 0 | 0 | 6 |
| Z21       | Asymptomatic human immunodef virus [HIV] infect status   | 0 | 0 | 0 | 0 | 0 | 0 | 0 | 0 | 0 | 0 | 0 | 0 | 0 | 0 | 0 | 0 | 0 | 6 |

| opcs | description                                                                          | cci_1pad | cci_2renal | cci_3liver |
|------|--------------------------------------------------------------------------------------|----------|------------|------------|
| L222 | Revision of prosthesis of bifurcation of aorta                                       | 1        | 0          | 0          |
| L223 | Revision of prosthesis of abdominal aorta NEC                                        | 1        | 0          | 0          |
| L224 | Removal of prosthesis from aorta                                                     | 1        | 0          | 0          |
| L235 | Revision of plastic repair of aorta                                                  | 1        | 0          | 0          |
| L16  | Extra-anatomic bypass of aorta                                                       | 1        | 0          | 0          |
| L168 | Other specified extra-anatomic bypass of aorta                                       | 1        | 0          | 0          |
| L169 | Unspecified extra-anatomic bypass of aorta                                           | 1        | 0          | 0          |
| L208 | Other specified other emergency bypass of segment of aorta                           | 1        | 0          | 0          |
| L209 | Unspecified other emergency bypass of segment of aorta                               | 1        | 0          | 0          |
| L21  | Other bypass of segment of aorta                                                     | 1        | 0          | 0          |
| L213 | Bypass of segment of suprarenal abdominal aorta by anastomosis of aorta to aorta NEC | 1        | 0          | 0          |
| L214 | Bypass of segment of infrarenal abdominal aorta by anastomosis of aorta to aorta NEC | 1        | 0          | 0          |
| L215 | Bypass of segment of abdominal aorta by anastomosis of aorta to aorta NEC            | 1        | 0          | 0          |
| L218 | Other specified other bypass of segment of aorta                                     | 1        | 0          | 0          |
| L219 | Unspecified other bypass of segment of aorta                                         | 1        | 0          | 0          |

|      |                                                                                                            |   |   |   |
|------|------------------------------------------------------------------------------------------------------------|---|---|---|
| L23  | Plastic repair of aorta                                                                                    | 1 | 0 | 0 |
| L231 | Plastic repair of aorta and end to end anastomosis of aorta                                                | 1 | 0 | 0 |
| L232 | Plastic repair of aorta using subclavian flap                                                              | 1 | 0 | 0 |
| L233 | Plastic repair of aorta using patch graft                                                                  | 1 | 0 | 0 |
| L236 | Plastic repair of aorta and insertion of tube graft                                                        | 1 | 0 | 0 |
| L25  | Other open operations on aorta                                                                             | 1 | 0 | 0 |
| L251 | Endarterectomy of aorta and patch repair of aorta                                                          | 1 | 0 | 0 |
| L252 | Endarterectomy of aorta NEC                                                                                | 1 | 0 | 0 |
| L258 | Other specified other open operations on aorta                                                             | 1 | 0 | 0 |
| L259 | Unspecified other open operations on aorta                                                                 | 1 | 0 | 0 |
| L26  | Transluminal operations on aorta                                                                           | 1 | 0 | 0 |
| L261 | Percutaneous transluminal balloon angioplasty of aorta                                                     | 1 | 0 | 0 |
| L262 | Percutaneous transluminal angioplasty of aorta NEC                                                         | 1 | 0 | 0 |
| L263 | Percutaneous transluminal embolectomy of bifurcation of aorta                                              | 1 | 0 | 0 |
| L265 | Percutaneous transluminal insertion of stent into aorta                                                    | 1 | 0 | 0 |
| L266 | Transluminal aortic stent graft with fenestration NEC                                                      | 1 | 0 | 0 |
| L267 | Transluminal aortic branched stent graft NEC                                                               | 1 | 0 | 0 |
| L268 | Other specified transluminal operations on aorta                                                           | 1 | 0 | 0 |
| L269 | Unspecified transluminal operations on aorta                                                               | 1 | 0 | 0 |
| L288 | Other specified transluminal operations on aneurysmal segment of aorta                                     | 1 | 0 | 0 |
| L289 | Unspecified transluminal operations on aneurysmal segment of aorta                                         | 1 | 0 | 0 |
| L18  | Emergency replacement of aneurysmal segment of aorta                                                       | 1 | 0 | 0 |
| L183 | Emergency replacement of aneurysmal segment of suprarenal abdominal aorta by anastomosis of aorta to aorta | 1 | 0 | 0 |
| L184 | Emergency replacement of aneurysmal segment of infrarenal abdominal aorta by anastomosis of aorta to aorta | 1 | 0 | 0 |
| L185 | Emergency replacement of aneurysmal segment of abdominal aorta by anastomosis of aorta to aorta NEC        | 1 | 0 | 0 |
| L186 | Emergency replacement of aneurysmal bifurcation of aorta by anastomosis of aorta to iliac artery           | 1 | 0 | 0 |
| L188 | Other specified emergency replacement of aneurysmal segment of aorta                                       | 1 | 0 | 0 |
| L189 | Unspecified emergency replacement of aneurysmal segment of aorta                                           | 1 | 0 | 0 |
| L20  | Other emergency bypass of segment of aorta                                                                 | 1 | 0 | 0 |
| L203 | Emergency bypass of segment of suprarenal abdominal aorta by anastomosis of aorta to aorta NEC             | 1 | 0 | 0 |
| L204 | Emergency bypass of segment of infrarenal abdominal aorta by anastomosis of aorta to aorta NEC             | 1 | 0 | 0 |



|      |                                                                                                      |   |   |   |
|------|------------------------------------------------------------------------------------------------------|---|---|---|
| L205 | Emergency bypass of segment of abdominal aorta by anastomosis of aorta to aorta NEC                  | 1 | 0 | 0 |
| L206 | Emergency bypass of bifurcation of aorta by anastomosis of aorta to iliac artery NEC                 | 1 | 0 | 0 |
| L19  | Other replacement of aneurysmal segment of aorta                                                     | 1 | 0 | 0 |
| L193 | Replacement of aneurysmal segment of suprarenal abdominal aorta by anastomosis of aorta to aorta NEC | 1 | 0 | 0 |
| L194 | Replacement of aneurysmal segment of infrarenal abdominal aorta by anastomosis of aorta to aorta NEC | 1 | 0 | 0 |
| L195 | Replacement of aneurysmal segment of abdominal aorta by anastomosis of aorta to aorta NEC            | 1 | 0 | 0 |
| L196 | Replacement of aneurysmal bifurcation of aorta by anastomosis of aorta to iliac artery NEC           | 1 | 0 | 0 |
| L198 | Other specified other replacement of aneurysmal segment of aorta                                     | 1 | 0 | 0 |
| L199 | Unspecified other replacement of aneurysmal segment of aorta                                         | 1 | 0 | 0 |
| L254 | Operations on aneurysm of aorta NEC                                                                  | 1 | 0 | 0 |
| L27  | Transluminal insertion of stent graft for aneurysmal segment of aorta                                | 1 | 0 | 0 |
| L271 | Endovascular insertion of stent graft for infrarenal abdominal aortic aneurysm                       | 1 | 0 | 0 |
| L272 | Endovascular insertion of stent graft for suprarenal aortic aneurysm                                 | 1 | 0 | 0 |
| L275 | Endovascular insertion of stent graft for aortic aneurysm of bifurcation NEC                         | 1 | 0 | 0 |
| L276 | Endovascular insertion of stent graft for aorto-uniliac aneurysm                                     | 1 | 0 | 0 |
| L278 | Other specified transluminal insertion of stent graft for aneurysmal segment of aorta                | 1 | 0 | 0 |
| L279 | Unspecified transluminal insertion of stent graft for aneurysmal segment of aorta                    | 1 | 0 | 0 |
| L28  | Transluminal operations on aneurysmal segment of aorta                                               | 1 | 0 | 0 |
| L281 | Endovascular insertion of stent for infrarenal abdominal aortic aneurysm                             | 1 | 0 | 0 |
| L282 | Endovascular insertion of stent for suprarenal aortic aneurysm                                       | 1 | 0 | 0 |
| L285 | Endovascular insertion of stent for aortic aneurysm of bifurcation NEC                               | 1 | 0 | 0 |
| L286 | Endovascular insertion of stent for aorto-uniliac aneurysm                                           | 1 | 0 | 0 |
| L50  | Other emergency bypass of iliac artery                                                               | 1 | 0 | 0 |
| L501 | Emergency bypass of common iliac artery by anastomosis of aorta to common iliac artery NEC           | 1 | 0 | 0 |
| L502 | Emergency bypass of iliac artery by anastomosis of aorta to external iliac artery NEC                | 1 | 0 | 0 |
| L503 | Emergency bypass of artery of leg by anastomosis of aorta to common femoral artery NEC               | 1 | 0 | 0 |
| L504 | Emergency bypass of artery of leg by anastomosis of aorta to deep femoral artery NEC                 | 1 | 0 | 0 |
| L505 | Emergency bypass of iliac artery by anastomosis of iliac artery to iliac artery NEC                  | 1 | 0 | 0 |
| L506 | Emergency bypass of artery of leg by anastomosis of iliac artery to femoral artery NEC               | 1 | 0 | 0 |
| L508 | Other specified other emergency bypass of iliac artery                                               | 1 | 0 | 0 |
| L509 | Unspecified other emergency bypass of iliac artery                                                   | 1 | 0 | 0 |

|      |                                                                                                              |   |   |   |
|------|--------------------------------------------------------------------------------------------------------------|---|---|---|
| L51  | Other bypass of iliac artery                                                                                 | 1 | 0 | 0 |
| L511 | Bypass of common iliac artery by anastomosis of aorta to common iliac artery NEC                             | 1 | 0 | 0 |
| L512 | Bypass of iliac artery by anastomosis of aorta to external iliac artery NEC                                  | 1 | 0 | 0 |
| L513 | Bypass of artery of leg by anastomosis of aorta to common femoral artery NEC                                 | 1 | 0 | 0 |
| L514 | Bypass of artery of leg by anastomosis of aorta to deep femoral artery NEC                                   | 1 | 0 | 0 |
| L515 | Bypass of iliac artery by anastomosis of iliac artery to iliac artery NEC                                    | 1 | 0 | 0 |
| L516 | Bypass of artery of leg by anastomosis of iliac artery to femoral artery NEC                                 | 1 | 0 | 0 |
| L518 | Other specified other bypass of iliac artery                                                                 | 1 | 0 | 0 |
| L519 | Unspecified other bypass of iliac artery                                                                     | 1 | 0 | 0 |
| L52  | Reconstruction of iliac artery                                                                               | 1 | 0 | 0 |
| L521 | Endarterectomy of iliac artery and patch repair of iliac artery                                              | 1 | 0 | 0 |
| L522 | Endarterectomy of iliac artery NEC                                                                           | 1 | 0 | 0 |
| L528 | Other specified reconstruction of iliac artery                                                               | 1 | 0 | 0 |
| L529 | Unspecified reconstruction of iliac artery                                                                   | 1 | 0 | 0 |
| L531 | Repair of iliac artery NEC                                                                                   | 1 | 0 | 0 |
| L532 | Open embolectomy of iliac artery                                                                             | 1 | 0 | 0 |
| L538 | Other specified other open operations on iliac artery                                                        | 1 | 0 | 0 |
| L539 | Unspecified other open operations on iliac artery                                                            | 1 | 0 | 0 |
| L54  | Transluminal operations on iliac artery                                                                      | 1 | 0 | 0 |
| L541 | Percutaneous transluminal angioplasty of iliac artery                                                        | 1 | 0 | 0 |
| L542 | Percutaneous transluminal embolectomy of iliac artery                                                        | 1 | 0 | 0 |
| L544 | Percutaneous transluminal insertion of stent into iliac artery                                               | 1 | 0 | 0 |
| L548 | Other specified transluminal operations on iliac artery                                                      | 1 | 0 | 0 |
| L549 | Unspecified transluminal operations on iliac artery                                                          | 1 | 0 | 0 |
| L58  | Other emergency bypass of femoral artery                                                                     | 1 | 0 | 0 |
| L581 | Emergency bypass of femoral artery by anastomosis of femoral artery to femoral artery NEC                    | 1 | 0 | 0 |
| L582 | Emergency bypass of femoral artery by anastomosis of femoral artery to popliteal artery using prosthesis NEC | 1 | 0 | 0 |
| L583 | Emergency bypass of femoral artery by anastomosis of femoral artery to popliteal artery using vein graft NEC | 1 | 0 | 0 |
| L584 | Emergency bypass of femoral artery by anastomosis of femoral artery to tibial artery using prosthesis NEC    | 1 | 0 | 0 |
| L585 | Emergency bypass of femoral artery by anastomosis of femoral artery to tibial artery using vein graft NEC    | 1 | 0 | 0 |
| L586 | Emergency bypass of femoral artery by anastomosis of femoral artery to peroneal artery using prosthesis NEC  | 1 | 0 | 0 |

|      |                                                                                                             |   |   |   |
|------|-------------------------------------------------------------------------------------------------------------|---|---|---|
| L587 | Emergency bypass of femoral artery by anastomosis of femoral artery to peroneal artery using vein graft NEC | 1 | 0 | 0 |
| L588 | Other specified other emergency bypass of femoral artery                                                    | 1 | 0 | 0 |
| L589 | Unspecified other emergency bypass of femoral artery                                                        | 1 | 0 | 0 |
| L59  | Other bypass of femoral artery                                                                              | 1 | 0 | 0 |
| L591 | Bypass of femoral artery by anastomosis of femoral artery to femoral artery NEC                             | 1 | 0 | 0 |
| L592 | Bypass of femoral artery by anastomosis of femoral artery to popliteal artery using prosthesis NEC          | 1 | 0 | 0 |
| L593 | Bypass of femoral artery by anastomosis of femoral artery to popliteal artery using vein graft NEC          | 1 | 0 | 0 |
| L594 | Bypass of femoral artery by anastomosis of femoral artery to tibial artery using prosthesis NEC             | 1 | 0 | 0 |
| L595 | Bypass of femoral artery by anastomosis of femoral artery to tibial artery using vein graft NEC             | 1 | 0 | 0 |
| L596 | Bypass of femoral artery by anastomosis of femoral artery to peroneal artery using prosthesis NEC           | 1 | 0 | 0 |
| L597 | Bypass of femoral artery by anastomosis of femoral artery to peroneal artery using vein graft NEC           | 1 | 0 | 0 |
| L598 | Other specified other bypass of femoral artery                                                              | 1 | 0 | 0 |
| L599 | Unspecified other bypass of femoral artery                                                                  | 1 | 0 | 0 |
| L60  | Reconstruction of femoral artery                                                                            | 1 | 0 | 0 |
| L601 | Endarterectomy of femoral artery and patch repair of femoral artery                                         | 1 | 0 | 0 |
| L602 | Endarterectomy of femoral artery NEC                                                                        | 1 | 0 | 0 |
| L603 | Profundoplasty of femoral artery and patch repair of deep femoral artery                                    | 1 | 0 | 0 |
| L604 | Profundoplasty of femoral artery NEC                                                                        | 1 | 0 | 0 |
| L608 | Other specified reconstruction of femoral artery                                                            | 1 | 0 | 0 |
| L609 | Unspecified reconstruction of femoral artery                                                                | 1 | 0 | 0 |
| L621 | Repair of femoral artery NEC                                                                                | 1 | 0 | 0 |
| L622 | Open embolectomy of femoral artery                                                                          | 1 | 0 | 0 |
| L628 | Other specified other open operations on femoral artery                                                     | 1 | 0 | 0 |
| L629 | Unspecified other open operations on femoral artery                                                         | 1 | 0 | 0 |
| L631 | Percutaneous transluminal angioplasty of femoral artery                                                     | 1 | 0 | 0 |
| L632 | Percutaneous transluminal embolectomy of femoral artery                                                     | 1 | 0 | 0 |
| L633 | Percutaneous transluminal embolisation of femoral artery                                                    | 1 | 0 | 0 |
| L635 | Percutaneous transluminal insertion of stent into femoral artery                                            | 1 | 0 | 0 |
| L638 | Other specified transluminal operations on femoral artery                                                   | 1 | 0 | 0 |
| L639 | Unspecified transluminal operations on femoral artery                                                       | 1 | 0 | 0 |
| L651 | Revision of reconstruction involving aorta                                                                  | 1 | 0 | 0 |

|      |                                                                      |   |   |   |
|------|----------------------------------------------------------------------|---|---|---|
| L652 | Revision of reconstruction involving iliac artery                    | 1 | 0 | 0 |
| L653 | Revision of reconstruction involving femoral artery                  | 1 | 0 | 0 |
| L742 | creation of arteriovenous fistula nec                                | 0 | 2 | 0 |
| L746 | creation of graft fistula for dialysis                               | 0 | 2 | 0 |
| M01  | Transplantation of kidney                                            | 0 | 2 | 0 |
| M011 | Autotransplantation of kidney                                        | 0 | 2 | 0 |
| M012 | Allotransplantation of kidney from live donor                        | 0 | 2 | 0 |
| M013 | Allotransplantation of kidney from cadaver NEC                       | 0 | 2 | 0 |
| M014 | Allotransplantation of kidney from cadaver heart beating             | 0 | 2 | 0 |
| M015 | Allotransplantation of kidney from cadaver heart non-beating         | 0 | 2 | 0 |
| M018 | Other specified transplantation of kidney                            | 0 | 2 | 0 |
| M019 | Unspecified transplantation of kidney                                | 0 | 2 | 0 |
| M026 | Excision of rejected transplanted kidney                             | 0 | 2 | 0 |
| M027 | excision of transplanted kidney nec                                  | 0 | 2 | 0 |
| M084 | Exploration of transplanted kidney                                   | 0 | 2 | 0 |
| M172 | Pre-transplantation of kidney work-up - recipient                    | 0 | 2 | 0 |
| M174 | Post-transplantation of kidney examination - recipient               | 0 | 2 | 0 |
| X401 | Renal dialysis                                                       | 0 | 2 | 0 |
| X402 | Peritoneal dialysis NEC                                              | 0 | 2 | 0 |
| X403 | Haemodialysis NEC                                                    | 0 | 2 | 0 |
| X404 | Haemofiltration                                                      | 0 | 2 | 0 |
| X405 | Automated peritoneal dialysis                                        | 0 | 2 | 0 |
| X406 | Continuous ambulatory peritoneal dialysis                            | 0 | 2 | 0 |
| X41  | Placement of ambulatory apparatus for compensation for renal failure | 0 | 2 | 0 |
| X411 | Insertion of ambulatory peritoneal dialysis catheter                 | 0 | 2 | 0 |
| X412 | Removal of ambulatory peritoneal dialysis catheter                   | 0 | 2 | 0 |
| X421 | Insertion of temporary peritoneal dialysis catheter                  | 0 | 2 | 0 |
| G10  | Open operations on varices of oesophagus                             | 0 | 0 | 3 |
| G101 | Disconnection of azygos vein                                         | 0 | 0 | 3 |
| G102 | Transection of oesophagus using staple gun                           | 0 | 0 | 3 |
| G103 | Transection of oesophagus NEC                                        | 0 | 0 | 3 |

|      |                                                                                        |   |   |   |
|------|----------------------------------------------------------------------------------------|---|---|---|
| G104 | Local ligation of varices of oesophagus                                                | 0 | 0 | 3 |
| G105 | Open injection sclerotherapy to varices of oesophagus                                  | 0 | 0 | 3 |
| G108 | Other specified open operations on varices of oesophagus                               | 0 | 0 | 3 |
| G109 | Unspecified open operations on varices of oesophagus                                   | 0 | 0 | 3 |
| G144 | Fibreoptic endoscopic injection sclerotherapy to varices of oesophagus                 | 0 | 0 | 3 |
| G174 | Endoscopic injection sclerotherapy to varices of oesophagus using rigid oesophagoscope | 0 | 0 | 3 |
| G437 | Fibreoptic endoscopic rubber band ligation of upper gastrointestinal tract varices     | 0 | 0 | 3 |
| J111 | Transjugular intrahepatic angioplasty of portal vein                                   | 0 | 0 | 3 |
| J114 | Transjugular intrahepatic creation of portosystemic shunt                              | 0 | 0 | 3 |
| J118 | Other specified transjugular intrahepatic operations on blood vessel of liver          | 0 | 0 | 3 |
| J119 | Unspecified transjugular intrahepatic operations on blood vessel of liver              | 0 | 0 | 3 |
